# Supplementary material for: Quantitative proteomics reveals the selectivity of ubiquitin-binding autophagy receptors in the turnover of damaged lysosomes by lysophagy
Source: PubMed Central journal article supplement (PMC8523161; doi:10.7554/elife.72328), 2021-09-29

FIGURE S2A / FIGURE S3A / FIGURE S4B

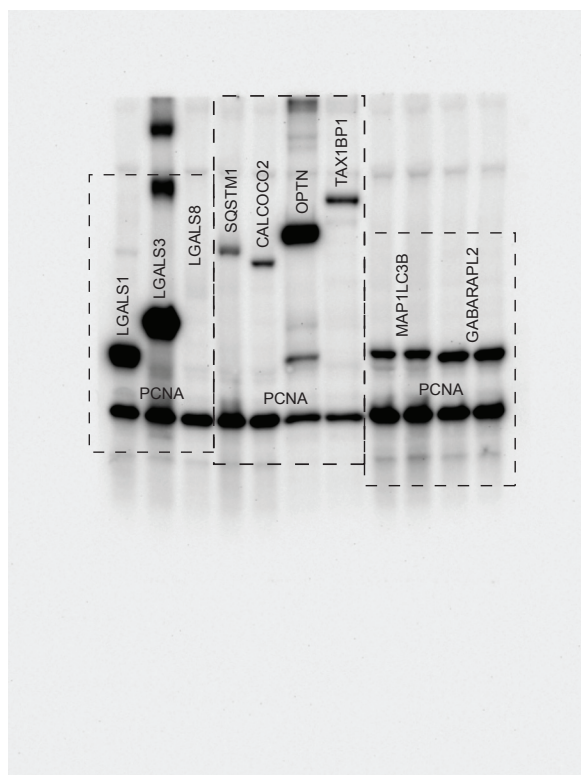

Supplement: elife-72328-fig2-figsupp1-data1.pdf [file elife-72328-fig2-figsupp1-data1.pdf]
