# Supplementary material for: Quantitative proteomics reveals the selectivity of ubiquitin-binding autophagy receptors in the turnover of damaged lysosomes by lysophagy
Source: PubMed Central journal article supplement (PMC8523161; doi:10.7554/elife.72328), 2021-09-29

Figure 5 - source data 4. Uncropped blots for panel H.

5F  
Keima

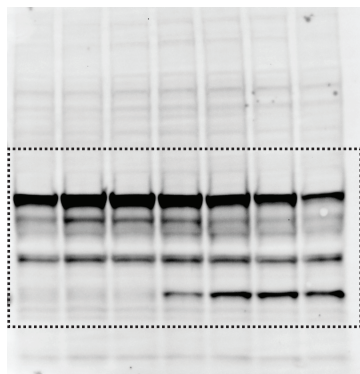

5H  
Keima

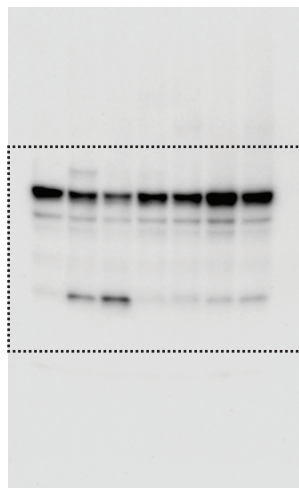

5F  
pTbk1

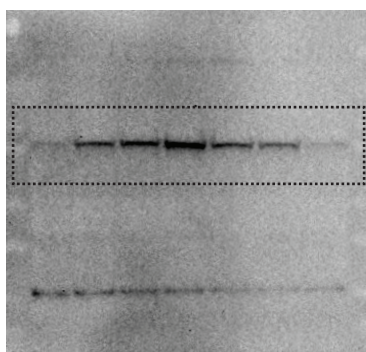

5H  
p-Tbk1

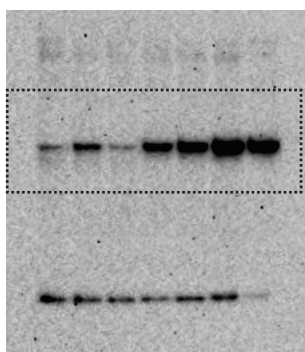

5F  
Tbk1

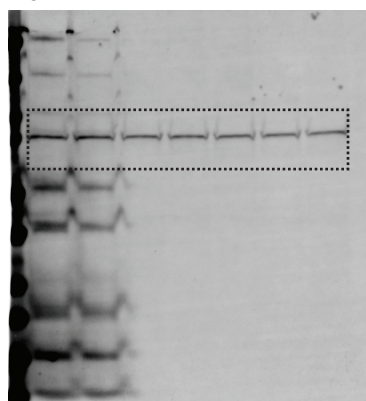

5H  
Tbk1

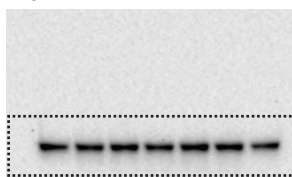

5H  
Actin

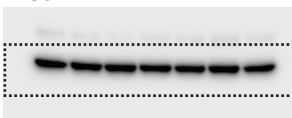

Supplement: elife-72328-fig5-data4.pdf [file elife-72328-fig5-data4.pdf]
