# Supplementary material for: Quantitative proteomics reveals the selectivity of ubiquitin-binding autophagy receptors in the turnover of damaged lysosomes by lysophagy
Source: eLife journal article supplement (doi:10.7554/elife.72328), 2021-09-29

FIGURE S1B / FIGURE S1D / FIGURE S1H

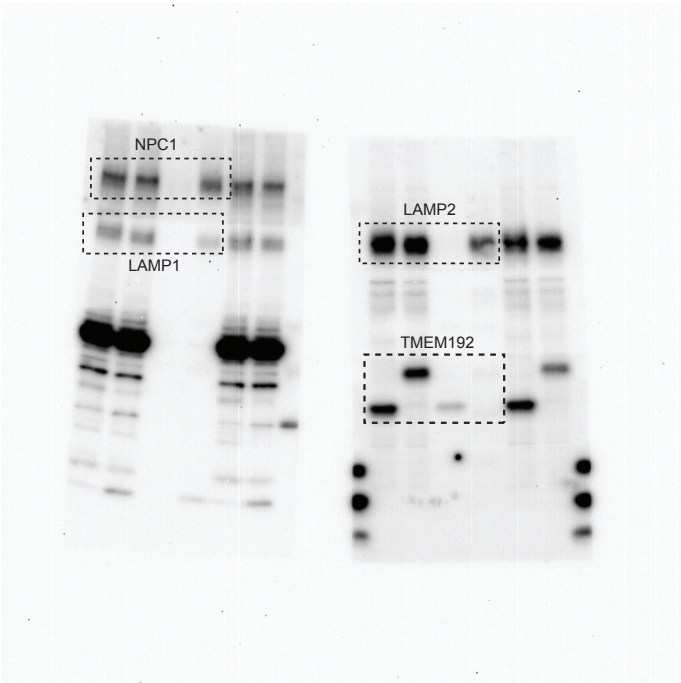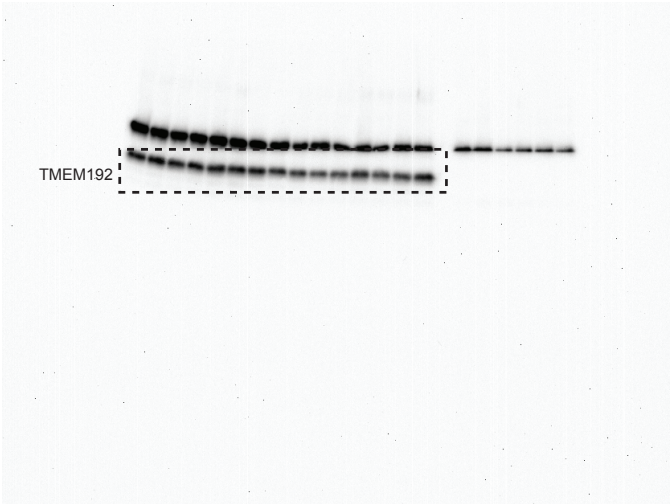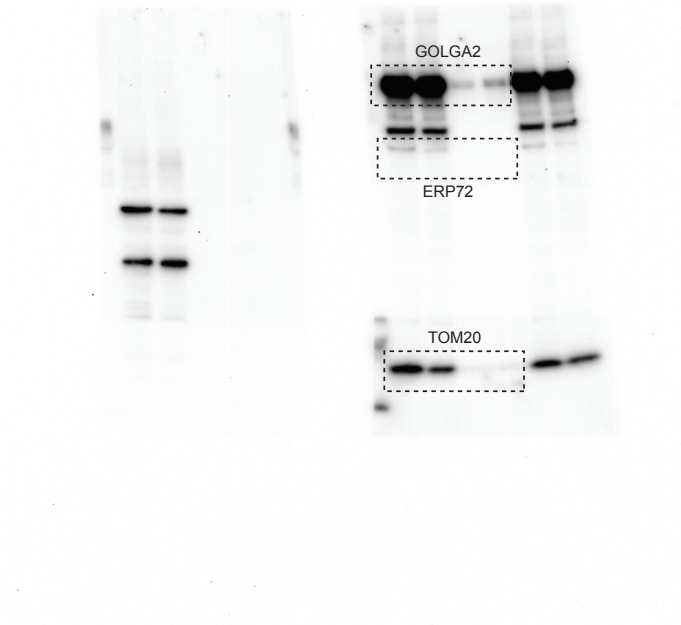

Supplement: fig1-figsupp1-data1 [file elife-72328-fig1-figsupp1-data1-v2.pdf]
