# Supplementary material for: Quantitative proteomics reveals the selectivity of ubiquitin-binding autophagy receptors in the turnover of damaged lysosomes by lysophagy
Source: eLife journal article supplement (doi:10.7554/elife.72328), 2021-09-29

Figure 5-figure supplement 1B-source data 1

S5B  
Keima

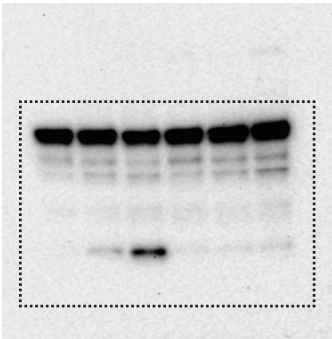

S5B  
p-Tbk1

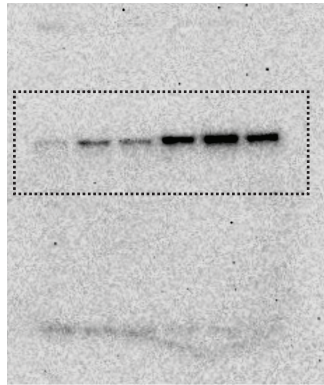

S5B  
FK2 (ub)

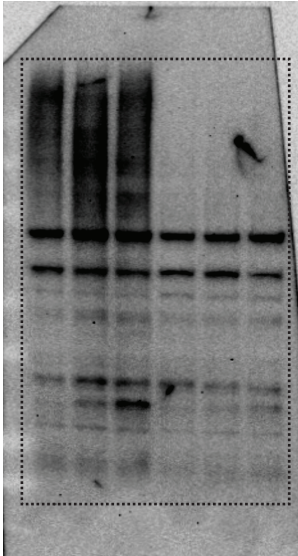

S5B  
Tbk1

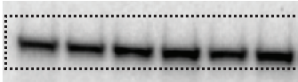

S5B  
FK2 (Actin)

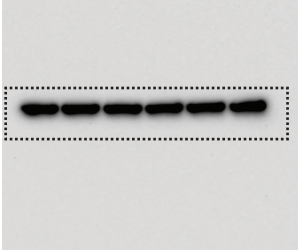

Supplement: fig5-figsupp1-data1 [file elife-72328-fig5-figsupp1-data1-v2.pdf]
