# Supplementary material for: Quantitative proteomics reveals the selectivity of ubiquitin-binding autophagy receptors in the turnover of damaged lysosomes by lysophagy
Source: eLife journal article supplement (doi:10.7554/elife.72328), 2021-09-29

Figure 6-source data 5. Uncropped blots for panel 6C.

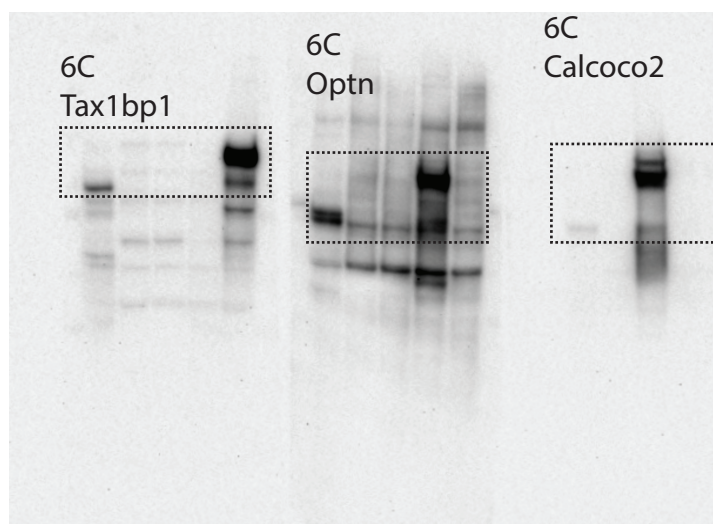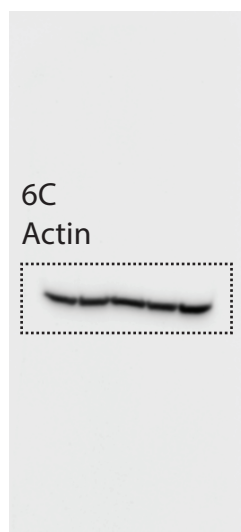

Supplement: fig6-data5 [file elife-72328-fig6-data5-v2.pdf]
