# Supplementary material for: Quantitative proteomics reveals the selectivity of ubiquitin-binding autophagy receptors in the turnover of damaged lysosomes by lysophagy
Source: eLife journal article supplement (doi:10.7554/elife.72328), 2021-09-29

Figure S7. Analysis of LGALS3R186S recruitment to damaged lysosomes in iNeurons.

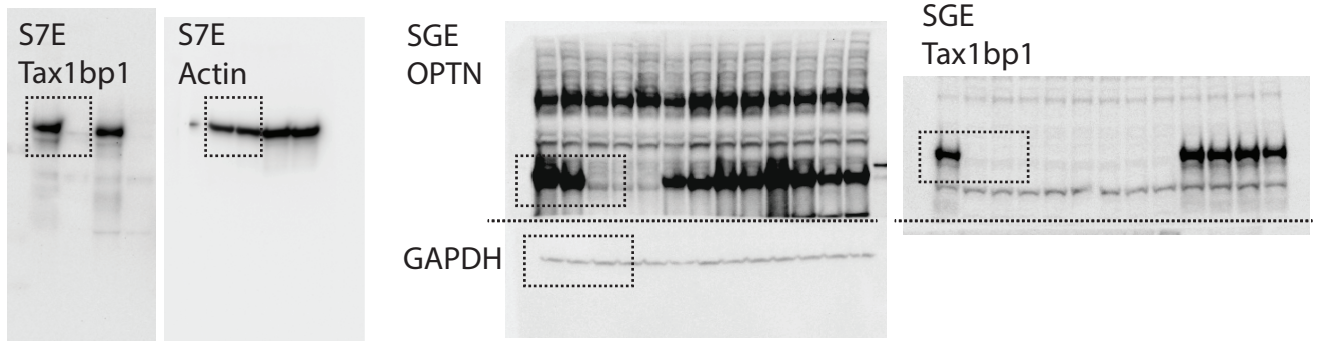

Supplement: fig7-figsupp1-data2 [file elife-72328-fig7-figsupp1-data2-v2.pdf]
