# Supplementary material for: Quantitative proteomics reveals the selectivity of ubiquitin-binding autophagy receptors in the turnover of damaged lysosomes by lysophagy
Source: eLife journal article supplement (doi:10.7554/elife.72328), 2021-09-29

Figure 8. Structure-function analysis of TAX1BP1 and OPTN for lysophagy.

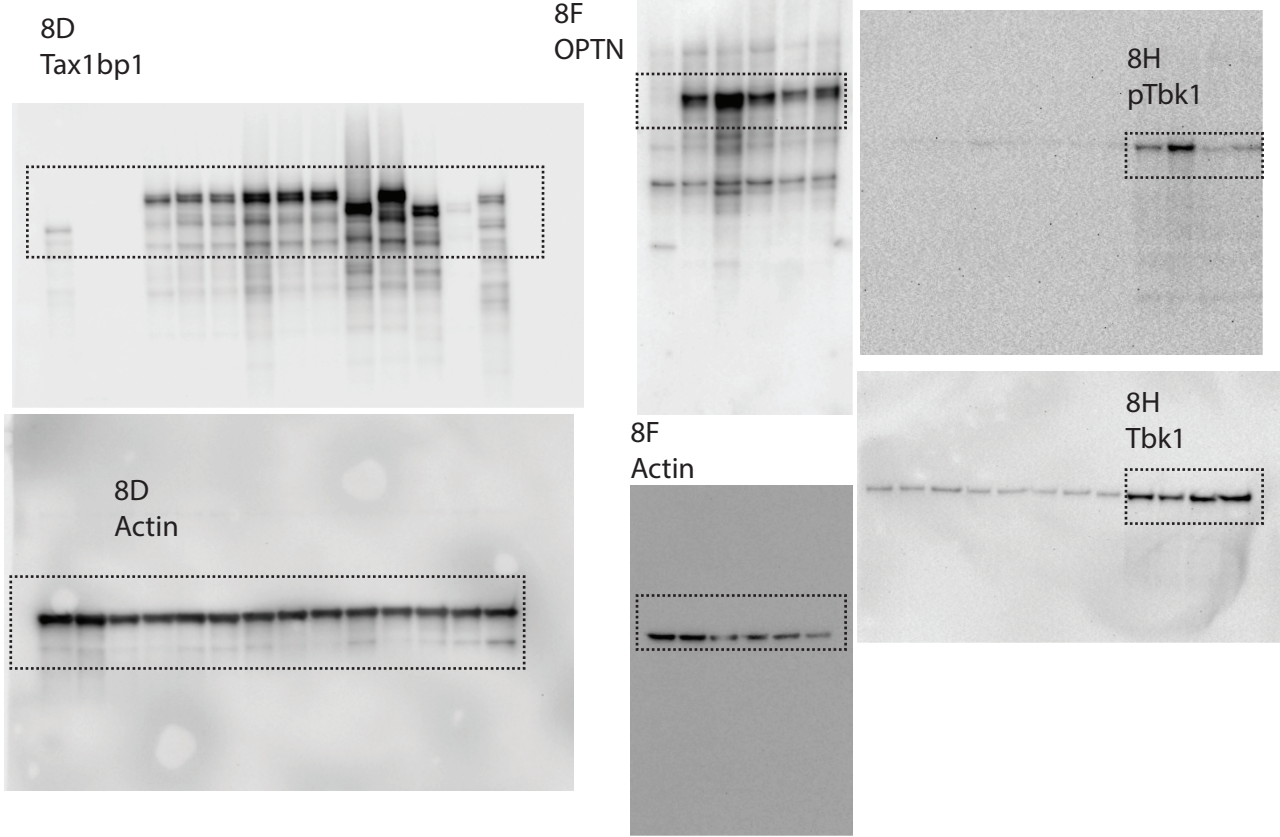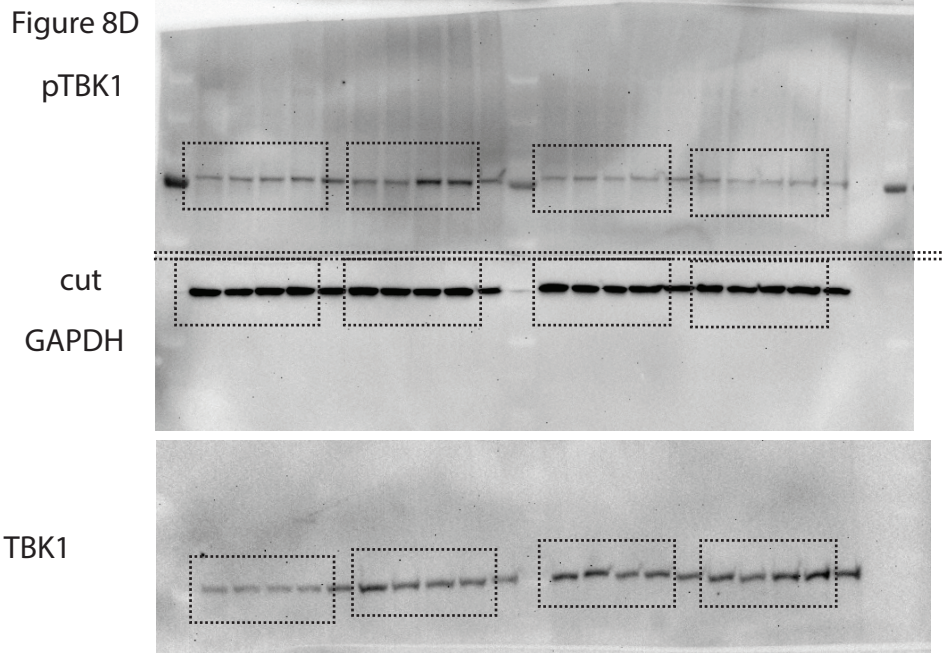

Supplement: fig8-data3 [file elife-72328-fig8-data3-v2.pdf]
