# Supplementary material for: Quantitative proteomics reveals the selectivity of ubiquitin-binding autophagy receptors in the turnover of damaged lysosomes by lysophagy
Source: eLife. 2021 Sep 29;10:e72328. doi: 10.7554/eLife.72328 (PMC8523161; doi:10.7554/eLife.72328)
Supplement: Figure 1—source data 2. [file elife-72328-fig1-data2.xlsx]

## Sheet: 1E_GPN_Timecourse
GABARAPL2		GABARAPL1		MAP1LC3B		LGALS1		LGALS3		CALCOCO2		MTOR		MLST8		RPTOR
0.170398	-0.193254	0.0445892	-0.0460115	0.123673	-0.135278	0.0255029	-0.0259619	-0.0129879	0.0128721	0.0561723	-0.0584483	-0.0585326	0.0562502	-0.0422808	0.0410769	-0.0616736	0.0591449
1.99219	2.15185	1.68358	1.82778	1.68937	1.79403	1.83169	1.78388	1.60559	1.56625	1.35203	1.36467	-1.11297	-1.25781	-1.14919	-1.23112	-1.19171	-1.26496
1.80506	1.62899	1.39571	1.3385	1.44708	1.23033	1.7132	1.92337	1.53885	1.75753	1.86436	1.87227	-0.768016	-0.900398	-0.649739	-0.733548	-0.799419	-0.932684
1.29943	1.67643	1.10189	1.15868	0.910647	1.19193	2.0665	2.12818	2.0705	2.13595	1.34268	1.50655	-0.567493	-0.543432	-0.519803	-0.506417	-0.574572	-0.592335
1.01095	0.539717	0.682585	0.544924	0.597673	0.407055	2.24444	2.60288	2.5586	2.1399	0.636012	1.00848	-0.655124	-0.291995	-0.575181	-0.13266	-0.672003	-0.215851
