# Supplementary material for: Quantitative proteomics reveals the selectivity of ubiquitin-binding autophagy receptors in the turnover of damaged lysosomes by lysophagy
Source: eLife. 2021 Sep 29;10:e72328. doi: 10.7554/eLife.72328 (PMC8523161; doi:10.7554/eLife.72328)
Supplement: Figure 2—figure supplement 1—source data 2. [file elife-72328-fig2-figsupp1-data2.xlsx]

## Sheet: S2D_graph
WT _1	WT_2	WT_avg	WT_stdev	WT-LLOME_1	WT-LLOME_2	WT-LLOME_3	WT-LLOME_avg	WT-LLOME_stdev	K51A_1	K51A_2	K51A_avg	K51A_stdev	K51A-LLOME_1	K51A-LLOME_2	K51A-LLOME_3	K51A-LLOME_avg	K51A-LLOME_stdev	AUTOPHAGY (24)
1.04614	0.953858	1	0.0652551	5.73033	6.06363	5.89049	5.89482	0.166692	0.824461	1.17554	1	0.248249	4.32853	3.94256	4.01693	4.09601	0.204776	LGALS8
1.18212	0.817883	1	0.257553	5.79343	5.43915	5.83295	5.68851	0.216854	0.920178	1.07982	1	0.112885	4.82584	4.03971	3.87693	4.24749	0.50743	LAMP2
1.09662	0.903385	1	0.136634	4.66857	4.86484	4.84216	4.79186	0.107372	0.767896	1.2321	1	0.328244	3.52418	3.043	2.99337	3.18685	0.293186	LGALS3
1.05676	0.943242	1	0.0802683	3.50643	3.43407	3.22451	3.38834	0.146417	0.943647	1.05635	1	0.0796949	3.40639	2.9216	2.97963	3.10254	0.264735	OPTN
1.08257	0.917431	1	0.11677	3.70358	3.08717	2.84159	3.21078	0.44409	0.881839	1.11816	1	0.167105	1.95971	1.95145	1.76581	1.89232	0.109645	MAP1LC3B2
1.07983	0.920171	1	0.112895	3.06021	3.33936	2.91133	3.10363	0.217293	0.929424	1.07058	1	0.0998101	2.68672	2.6441	2.51849	2.61644	0.0874589	GABARAPL2
1.07741	0.922594	1	0.109468	2.94108	3.02881	2.74748	2.90579	0.143946	0.978694	1.02131	1	0.0301317	2.80193	2.64022	2.57837	2.67351	0.115433	CALCOCO2
1.08049	0.919508	1	0.113833	2.43897	2.40077	2.46435	2.43469	0.0320024	0.986124	1.01388	1	0.0196243	1.98058	1.81364	1.70532	1.83318	0.138668	LGALS1
0.995573	1.00443	1	0.00626039	2.04765	1.49948	1.71999	1.7557	0.275826	0.929182	1.07082	1	0.100152	1.19228	1.4618	1.24026	1.29811	0.143775	ATG4B
1.08078	0.919222	1	0.114237	1.66705	1.88059	1.64991	1.73252	0.128521	0.892079	1.10792	1	0.152624	1.77203	1.63392	1.64444	1.68346	0.0768816	SQSTM1
1.03037	0.969633	1	0.0429455	1.6976	1.68179	1.78768	1.72236	0.0571193	0.896542	1.10346	1	0.146312	1.72177	1.72691	1.46498	1.63788	0.149764	VAPB
1.13326	0.866742	1	0.188455	1.66417	1.78957	1.6045	1.68608	0.0944603	1.17335	0.826645	1	0.245161	1.20831	0.950211	1.12317	1.0939	0.131515	TBK1
1.062	0.938	1	0.0876806	1.67391	1.6098	1.62978	1.63783	0.0328018	0.906547	1.09345	1	0.132162	1.70116	1.67669	1.52096	1.63293	0.0977429	VAPA
0.979873	1.02013	1	0.0284645	1.55784	1.63687	1.62495	1.60656	0.0426037	0.961256	1.03874	1	0.0547919	1.56688	1.29341	1.29281	1.38436	0.158065	TOLLIP
1.02911	0.970895	1	0.0411612	1.63372	1.50579	1.60318	1.5809	0.0668151	0.930915	1.06908	1	0.0977002	1.54539	1.49718	1.42456	1.48904	0.0608254	FKBP8
1.01995	0.980047	1	0.0282181	1.36188	1.60379	1.32667	1.43078	0.150859	0.998581	1.00142	1	0.00200727	1.77956	1.62352	1.65499	1.68602	0.0825187	ATG9A
1.04246	0.957544	1	0.0600419	1.36018	1.25178	1.33567	1.31588	0.0568475	0.937868	1.06213	1	0.0878679	1.49775	1.47555	1.36926	1.44752	0.0686779	ATL3
1.0857	0.914302	1	0.121195	1.35264	1.24732	1.19293	1.2643	0.0811987	0.922274	1.07773	1	0.109922	1.79193	1.83472	1.55164	1.72609	0.152592	WIPI2
1.10552	0.894482	1	0.149225	1.26586	1.33321	1.16733	1.25546	0.083427	0.892023	1.10798	1	0.152702	1.85508	1.79897	1.85442	1.83616	0.0322065	TAX1BP1
