# Supplementary material for: Quantitative proteomics reveals the selectivity of ubiquitin-binding autophagy receptors in the turnover of damaged lysosomes by lysophagy
Source: eLife. 2021 Sep 29;10:e72328. doi: 10.7554/eLife.72328 (PMC8523161; doi:10.7554/eLife.72328)
Supplement: Figure 2—figure supplement 1—source data 3. [file elife-72328-fig2-figsupp1-data3.xlsx]

## Sheet: S2E_graph
WT _1	WT_2	WT_avg	WT_stdev	WT-LLOME_1	WT-LLOME_2	WT-LLOME_3	WT-LLOME_avg	WT-LLOME_stdev	Y49A_1	Y49A_2	Y49A_avg	Y49A_stdev	Y49A-LLOME_1	Y49A-LLOME_2	Y49A-LLOME_3	Y49A-LLOME_avg	Y49A-LLOME_stdev	AUTOPHAGY (20)
1.11846	0.881544	1	0.167523	10.628	11.9357	10.3573	10.9737	0.844081	0.647059	1.35294	1	0.499135	4.87205	5.55744	4.12871	4.85273	0.71456	LAMP2
1.06705	0.932951	1	0.0948209	7.79245	8.09884	7.35155	7.74762	0.375657	0.788147	1.21185	1	0.299606	4.23671	5.30326	5.85077	5.13025	0.820822	LGALS3
1.01619	0.983811	1	0.0228948	5.128	4.43455	5.39936	4.9873	0.497557	0.892045	1.10795	1	0.152671	3.42706	3.86287	3.73321	3.67438	0.22378	LGALS8
1.08337	0.916627	1	0.117908	3.33306	3.19946	3.15623	3.22958	0.0921849	0.938218	1.06178	1	0.0873723	1.46786	1.61861	1.59304	1.55984	0.0806751	GABARAPL2
1.06768	0.932323	1	0.0957091	3.10388	2.79053	3.06157	2.98533	0.170018	0.941849	1.05815	1	0.0822386	2.24143	2.4925	2.11067	2.28153	0.194051	CALCOCO2
1.07307	0.926929	1	0.103338	2.73972	3.01681	3.02904	2.92852	0.163623	0.940848	1.05915	1	0.083653	1.86068	1.87817	1.69806	1.8123	0.099323	OPTN
0.966449	1.03355	1	0.0474487	2.74609	3.02985	2.3668	2.71425	0.332669	0.928659	1.07134	1	0.100892	1.78845	2.32535	2.29187	2.13522	0.300779	LGALS1
1.10198	0.898017	1	0.144226	1.56307	1.59455	1.63356	1.59706	0.0353091	1.01661	0.983392	1	0.0234873	1.08483	1.21689	1.17685	1.15952	0.0677118	VAPB
1.09991	0.900093	1	0.14129	1.46456	1.31652	1.5355	1.43886	0.111731	1.01483	0.985167	1	0.0209777	1.05007	1.13858	1.01808	1.06891	0.0624176	CCPG1
1.06995	0.930052	1	0.0989208	1.45723	1.38578	1.44496	1.42932	0.0382043	0.982393	1.01761	1	0.0248999	1.07994	1.19281	1.14331	1.13869	0.056576	VAPA
1.05813	0.941874	1	0.0822022	1.42134	1.37733	1.45036	1.41635	0.0367701	0.94602	1.05398	1	0.076339	1.11497	1.09354	1.01605	1.07485	0.0520401	SQSTM1
1.05474	0.945259	1	0.0774154	1.44896	1.33036	1.33542	1.37158	0.0670646	0.988086	1.01191	1	0.0168496	1.13106	1.1619	1.17721	1.15672	0.0235075	FKBP8
1.14124	0.858755	1	0.19975	1.37937	1.25553	1.29844	1.31111	0.0628871	0.978886	1.02111	1	0.0298595	1.05853	1.24297	0.97852	1.09334	0.135619	RTN3
