# Supplementary material for: Quantitative proteomics reveals the selectivity of ubiquitin-binding autophagy receptors in the turnover of damaged lysosomes by lysophagy
Source: eLife. 2021 Sep 29;10:e72328. doi: 10.7554/eLife.72328 (PMC8523161; doi:10.7554/eLife.72328)
Supplement: Figure 2—source data 1. [file elife-72328-fig2-data1.xlsx]

## Sheet: 2D_APEXLC3B_Organelle_Enrichmen
ER	Golgi	Lysosome	Mitochondria	Plasma Membrane	Endosome	Nucleus	Cytoplasm
0.042	0.709	1.705	-0.172	-0.164	-0.198	-0.29	-0.784
-0.415	-0.102	1.129	-0.113	-0.42	-0.015	0.1	-0.161
0.369	0.39	1.316	-0.258	-0.126	0.32	0.322	-0.124
0.396	-0.196	0.84	0.888	0.982	0.092	-0.4	-0.058
0.352	-0.05	1.313	-0.123	0.063	0.388	0.189	-0.186
0.191	-0.172	1.346	0.08	-0.103	0.284	-0.249	-0.144
0.427	-0.668	0.974	0.313	0.834	0.48	-0.299	-0.278
0.367	0.105	1.173	-0.237	-0.653	0.124	0.153	-0.187
-0.305	0.118	0.984	-0.002	0.269	0.45	0.168	-0.131
-0.575	-0.345	2.034	-0.09	0.001	0.373	-0.544	-0.038
-0.039	-0.058	1.766	0.331	-0.236	0.418	1.356	0.057
-0.036	0.353	3.156	-0.262	-0.785	0.66	0.502	-0.066
0.262	-0.276	2.583	-0.084	0.97	0.383	-0.285	0.249
-0.196	-0.044	1.388	-0.016	0.393	0.892	-0.493	-0.114
0.032	0.28	1.632	-0.223	-0.25	0.542	-0.059	0.045
0.087	0.884	2.954	0.114	-0.458	0.129	-1.197	0.262
0.139	0.597	2.508	0.38	-0.217	0.567	-0.493	0.812
0.381	0.337	2.305	-0.378	-0.155	-0.033	-0.229	0.822
-0.018	-0.326	1.624	0.203	-0.079	0.501	-0.179	-0.111
0.012	-0.394	1.875	0.251	-0.17	0.076	0.067	-0.093
-0.059	0.004	2.338	-0.071	1.531	0.368	-0.473	-0.174
-0.464	0.092	1.843	0.667	1.102	-0.257	0.042	0.144
-0.207		3.029	-0.061		-0.233	-0.107	-0.109
0.061		0.61	-0.211		-0.152	-0.266	-0.135
-0.095		1.871	-0.564		-0.172	-1.356	-0.203
-0.107			0.076		0.647	-0.247	-0.082
-0.464			-0.005		0.709	-1.931	0.31
-0.442			-0.49		1.582	-0.417	-0.172
0.067			-0.253		1.335	-0.097	0.085
-0.385			-0.201			-0.392	-0.164
0.401			0.273			-0.98	0.119
0.286			0.17			-1.148	0.604
0.548			-0.243			-1.009	-0.215
0.335			-0.286			-0.886	-0.162
0.121			-0.155			-1.507	-0.305
0.594			-0.655			-1.191	-0.384
0.38			-0.582			-0.361	-0.52
0.033			-0.175			-0.793	-0.284
0.39			-0.093			-0.777	-0.048
0.396			0.425			-0.607	-0.295
0.097			-0.095			-0.585	0.069
0.73			-0.159			-0.992	-0.304
-0.176			-0.05			-0.746	-0.685
0.339			-0.29			-0.112	-0.151
0.117			-0.211			-0.384	-0.218
-0.179			-0.391			-0.478	-0.161
0.784			-0.082			-0.302	-0.134
			-0.269			-0.476	-0.225
			-0.111			0.01	0.292
			0.006			0.696	-0.243
			0.373			-0.356	-0.337
			0.351			-0.86	-0.107
						-1.114	-0.013
						-0.83	-0.003
						-0.588	-0.544
						-0.454	-0.401
						0.1	0.034
						-0.353	-0.148
						-0.92	0.186
						-0.013	-0.315
						-0.336	0.246
						-0.677	-0.028
						-0.019	-0.166
						0.374	-0.197
						-0.222	-0.184
						-0.285	-0.151
						0.122	-0.175
						0.305	-0.149
						-0.207	-0.306
						-0.544	0.053
						-0.005	-0.32
						-0.296	-0.155
						-0.25	-0.152
						-0.261	0.684
						-0.283	-0.541
						-0.276	0.024
						-0.546	-0.047
						-0.49	-0.201
						0.74	-0.005
						-0.3	-0.031
						-0.218	-0.261
						-0.517	-0.172
						-2.291	-0.045
						-0.308	-0.138
						-0.896	0.107
						-0.558	0.095
						-0.356	-0.237
						-0.225	0.399
						-0.434	-0.38
						-0.486	-0.322
						-0.582	0.436
						-0.259	-0.337
						-0.325	-0.382
						-0.623	-0.283
						-0.475	-0.23
						-1.032	0.081
						-0.034	-0.162
						-0.675	0.06
						0.588	-0.283
						-0.488	0.011
						-0.633	1.377
						-1.175	1.345
						-0.19	0.818
						-0.753	0.754
						0.005	-0.027
						-1.948	0.067
						0.013	0.262
						-0.46	0.684
						-0.027	-0.261
						-1.009	-0.189
						-1.15	0.239
						-0.864	-0.297
						0.116	-0.013
						-0.545	-0.11
						-0.44	-0.088
						-0.429	-0.142
						-0.315
						-0.089
						0.048
						-0.132
						-0.223
						-0.417
						-0.886
						-0.135
						-0.089
						0.593
						0.151
						-1.152
