# Supplementary material for: Quantitative proteomics reveals the selectivity of ubiquitin-binding autophagy receptors in the turnover of damaged lysosomes by lysophagy
Source: eLife. 2021 Sep 29;10:e72328. doi: 10.7554/eLife.72328 (PMC8523161; doi:10.7554/eLife.72328)
Supplement: Figure 2—source data 2. [file elife-72328-fig2-data2.xlsx]

## Sheet: 2F_APEX2_GL2_Organelles
WT LLOME/WT-ER	WT LLOME/WT-Golgi	WT LLOME/WT-Lysosome	WT LLOME/WT-Mitochondria	WT LLOME/WT-Plasma Membrane	WT LLOME/WT-Endosome	WT LLOME/WT-Nucleus	WT LLOME/WT-Cytoplasm
-0.108	0.771	1.546	-0.062	-0.033	-0.27	-0.336	-0.542
0.154	-0.204	1.426	-0.106	-0.297	0.276	-0.299	-0.068
0.131	0.022	0.632	0.539	-0.325	0.418	-0.122	-0.06
0.254	-0.175	0.822	0.802	0.92	0.391	-0.464	-0.309
0.33	-0.051	0.546	-0.085	-0.089	0.834	-0.462	0.501
0.057	-0.173	1.139	-0.704	0.052	0.221	-0.197	-0.305
-0.113	0.285	2.64	-0.051	-0.268	0.471	0.067	1.15
-0.221	-0.222	1.773	-0.42	0.429	0.387	-0.296	-0.199
-0.324	-0.163	2.067	0.058	-0.792	0.395	-0.066	-0.9
0.355	-0.582	1.293	-0.445	-0.295	0.451	-0.182	-0.843
0.087	0.002	4.292	-0.07	-0.106	0.59	-0.47	0.406
0.108	-0.084	3.286	-0.106	-0.337	0.703	0.006	-0.777
0.19	0.063	2.709	-0.002	-1.942	0.383	0.974	-0.404
0.024	-0.263	1.35	0.215	1.605	0.282	-0.38	0.099
0.142	-0.078	0.715	0.476	-0.234	0.343	-0.154	0.23
-0.09	0.347	2.95	0.514	0.001	0.634	-0.084	-0.296
-0.092	0.576	2.822	-0.177	-0.319	0.14	-0.431	-0.186
0.039	-0.055	3.456	-0.295	-0.199	-0.358	-0.219	-0.316
-0.218	0.202	2.815	-0.184	-0.001	1.222	-0.347	1.244
-0.068	-0.197	2.524	0.04	-0.159	-0.311	-1.349	-0.187
-0.295	-0.315	1.108	-0.378		0.107	-0.297	-0.327
-0.086	-0.035	2.034	-0.202		0.771	-0.444	0.25
0.109	-0.125	1.555	0.063			-0.305	-0.065
-0.102		4.299	0.141			1.267	-0.03
-0.086		1.041	0.403			-0.227	-0.14
-0.139			-0.109			-0.593	0.073
0.423			-0.065			-0.33	0.169
0.141			-0.017			-0.243	-0.252
-0.255			-0.464			-0.184	0.429
-0.009			-0.347			-0.258	-0.527
-0.025			-0.172			-1.197	0.537
-0.318			-0.531			-0.627	-0.706
0.115			-0.349			-1.897	-0.523
-0.349			-0.108			-0.429	-0.436
0.391			-0.041			-0.032	-0.831
0.364			-0.061			-0.414	-0.418
0.652			0.06			-0.32	-0.064
0.223			0.124			-1.205	-0.595
-0.07			0.331			-0.436	-0.752
0.602			0.143			-1.064	-0.173
0.145			0.081			-0.922	-0.52
0.178			-0.36			-0.512	-0.27
0.527			-0.42			-0.817	0.307
0.083			-0.023			-0.952	-0.284
-0.394			-0.241			-0.419	-0.272
0.036			-0.335			-1.098	0.037
0.352			-0.282			-1.238	-0.317
0.202			-0.624			-0.644	-0.41
-0.544			0.354			-0.608	-0.344
0.087			0.092			-0.355	-0.047
0.675						-0.41	0.038
						0.025	-0.569
						-1.142	-1.049
						-0.821	-0.223
						-0.636	0.142
						-0.875	-0.205
						-0.55	-0.038
						0.038	0.341
						-0.681	-0.009
						0.202	-0.598
						-1.098	-0.126
						-1.088	-0.137
						-0.422	0.004
						-0.133	-0.07
						0.135	-0.796
						-0.146	-0.408
						-0.377	0.905
						-0.107	-0.215
						-0.938	-0.048
						0.375	0.552
						-0.315	0.202
						0.242	-0.508
						0.199	0.164
						-0.578	-0.124
						-0.073	0.725
						-0.045	-0.836
						-0.224	0.243
						-0.152	0.062
						-0.248	-0.393
						-0.031	-0.318
						-0.18	-0.531
						-0.059	0.213
						-0.275	-0.024
						1.176	-0.12
						-0.062	-0.118
						-0.772	0.078
						-1.78	0.041
						-0.319	-0.246
						-1.139	0.029
						1.042	0.133
						-0.546	0.062
						-0.021	-0.28
						0.054	-0.263
						-0.086	-0.27
						-0.175	-0.317
						-0.638	0.641
						-0.618	-0.228
						-0.433	-0.311
						-0.421	0.026
						-0.987	-0.102
						0.045	0.322
						-0.614	-0.269
						-0.433	-0.032
						-0.297	0.243
						-0.868	-0.738
						-0.773	-0.267
						-0.644	0.083
						-0.032	2.042
						-0.482	0.204
						-0.906	0.332
						-0.978	0.374
						-0.24	-0.061
						-0.573	-0.825
						-0.212	0.348
						-2.308	0.045
						-0.235	0.504
						-0.194	-0.249
						-0.379	-0.129
						-0.039	-0.067
						-0.086
						-0.091
						-1.099
						-0.942
						-0.354
						-0.232
						-0.137
						-0.172
						-0.192
						-0.328
						-0.557
						-0.339
						-0.291
						-0.747
						-0.518
						0.038
						0.178
						-0.261
						-0.922
