# Supplementary material for: Quantitative proteomics reveals the selectivity of ubiquitin-binding autophagy receptors in the turnover of damaged lysosomes by lysophagy
Source: eLife. 2021 Sep 29;10:e72328. doi: 10.7554/eLife.72328 (PMC8523161; doi:10.7554/eLife.72328)
Supplement: Figure 2—source data 3. [file elife-72328-fig2-data3.xlsx]

## Sheet: 2H_APEX2_GL2_LIR_Interactome
	WT-LLoMe	Y49A-LLoMe
SCARB2	4.29366	3.41186
CTSZ	4.28611	3.94499
LAMP2	3.4532	2.26821
GBA	3.28408	2.74297
LGALS3	2.95261	2.34615
HEXB	2.94884	2.59454
LAMTOR1	2.81511	1.90192
CDKN2A	2.86599	2.60926
LAMP1	2.82164	1.9013
GLB1	2.70454	2.19131
CRADD	2.67835	2.54292
NPC1	2.52345	1.51261
CTSA	2.6325	2.4083
SDCBP	2.49107	1.54754
VAMP7	2.38539	1.33573
LGALS8	2.31332	1.87569
TAGLN	2.04115	1.84669
IST1	2.08881	0.901469
PSAP	2.03301	2.0049
CTSD	2.0655	1.93753
HPCAL1	1.9352	1.64737
PLD3	2.02546	1.75805
TSPAN6	2.07935	1.25081
SRA1	1.77474	1.41776
EIF5A	1.7979	1.41287
YKT6	1.75445	1.42612
CTSC	1.77124	1.83891
GABARAPL2	1.69096	0.640084
EDIL3	1.72717	1.58756
SERPINB5	1.63576	1.56655
SCYL2	1.76383	1.7408
NAPA	1.60437	1.55585
TRMT112	1.73711	1.70671
CALCOCO2	1.57629	1.18657
PDCD6	1.63785	1.42821
SNCA	1.57768	1.09259
RRAGC	1.5538	0.969856
CDK1	1.56612	1.93042
MTPN	1.50929	1.30876
CLINT1	1.66747	1.21645
CDKN2C	1.53518	1.32116
ACP2	1.54568	0.957975
LRRC57	1.51771	1.43794
NECAP2	1.40126	1.22597
LGALS1	1.43319	1.08423
OPTN	1.54864	0.856348
ARL8B	1.4261	0.998573
NAPG	1.45249	1.52593
C14orf166	1.3268	0.952786
CNN2	1.43645	1.18778
SRI	1.34781	1.08996
NUDCD2	1.41489	1.37165
PBK	1.41923	1.27954
ARFGAP1	1.32721	1.30632
ANXA1	1.29777	1.01553
GNS	1.34618	1.32813
NEDD4	1.2431	0.389565
TAGLN2	1.26173	1.06362
CRIP2	1.12205	0.86086
DUSP3	1.26644	1.26156
ANXA7	1.1303	1.09561
AIP	1.14945	0.769844
PCBP1	1.18786	1.05508
XIAP	1.16728	0.847761
BAG4	1.24375	1.12521
CTSL	1.28613	1.27435
UBC	1.2722	1.09622
SNX3	1.21994	1.44792
RAB34	1.17531	0.87153
FLOT2	1.19963	0.498299
PARK7	1.064	0.839555
C12orf23	1.01326	0.992528
NUBP2	1.12292	1.22666
BZW1	1.08947	1.17561
CSTB	1.14901	0.739361
PCBP2	1.10011	1.07187
NEK7	1.02695	1.47133
CHMP5	1.1423	0.455605
CLCN3	1.13708	0.623011
TXN	0.98212	0.71982
AGTRAP	1.06431	0.507917
SCPEP1	1.03953	1.01714
RNASEH2A	1.03662	1.0421
VPS25	1.00571	1.44128
NECAP1	1.03038	0.682938
PPT1	1.09395	1.18788
