# Supplementary material for: Quantitative proteomics reveals the selectivity of ubiquitin-binding autophagy receptors in the turnover of damaged lysosomes by lysophagy
Source: eLife. 2021 Sep 29;10:e72328. doi: 10.7554/eLife.72328 (PMC8523161; doi:10.7554/eLife.72328)
Supplement: Figure 2—source data 4. [file elife-72328-fig2-data4.xlsx]

## Sheet: 2I_LC3B_LIR_Interactome
	WT-LLoMe	K51A-LLoMe
CTSZ	3.15397	2.35948
SCARB2	3.02865	2.70514
TBCEL	2.98459	2.35393
LAMP1	2.95352	2.66399
GBA	2.58145	1.99228
LGALS8	2.55906	2.03303
LAMP2	2.50734	2.07998
PSAP	2.33593	1.81916
LAMTOR1	2.30482	1.98717
LGALS3	2.26034	1.66818
IST1	2.18417	1.96554
CDKN2A	2.12575	1.28418
CTSA	2.02543	1.5545
TMEM55B	1.87037	1.83552
NPC1	1.8724	1.9378
RRAGC	1.84248	1.91839
FIS1	1.81482	1.42215
CTSD	1.76486	1.37578
PLD3	1.75944	1.2045
OPTN	1.75967	1.63004
ACP2	1.70493	1.55917
UBC	1.69151	1.29004
MAP1LC3B2	1.67397	0.918507
TMEM184C	1.62932	1.20591
GABARAPL2	1.63163	1.38706
HEXB	1.63023	1.48547
LAMTOR2	1.6236	1.33466
VPS4B	1.58218	1.05756
CALCOCO2	1.53774	1.41785
TM7SF3	1.53068	1.09789
FLOT1	1.45764	0.955616
CHMP5	1.38944	1.05926
STK11IP	1.36083	1.36379
GLB1	1.38055	1.03737
PI4K2A	1.35297	1.31481
CHD6	1.35114	1.1638
ATP6V1E1	1.34578	1.15354
TAGLN	1.34524	0.848734
VTA1	1.33226	1.14699
ATP6V0D1	1.31547	1.04815
ATP6V1B2	1.31267	1.16345
LGALS1	1.28366	0.871617
NEK7	1.26193	0.505931
UBE2C	1.24301	1.15747
NEDD4	1.2082	0.953474
AGTRAP	1.21309	1.0365
EDIL3	1.20499	0.860895
SDCBP	1.18914	0.526411
CD63	1.14033	0.841708
ARL8B	1.129	1.12208
OSBP	1.12986	0.868992
TPBG	1.10215	0.792881
TRMT112	1.09469	0.548327
SERPINB5	1.09125	0.985086
EIF5A	1.07929	0.827235
AGFG2	1.02347	0.737512
