# Supplementary material for: Quantitative proteomics reveals the selectivity of ubiquitin-binding autophagy receptors in the turnover of damaged lysosomes by lysophagy
Source: eLife. 2021 Sep 29;10:e72328. doi: 10.7554/eLife.72328 (PMC8523161; doi:10.7554/eLife.72328)
Supplement: Figure 3—source data 1. [file elife-72328-fig3-data1.xlsx]

## Sheet: 3F_Lysosome_Enrichment
APEX2-LGALS1	APEX2-LGALS3	APEX2-LGALS8
1.29647	2.1306	2.90204
2.60127	3.28112
		2.09338
4.05896	4.25104
2.54534	2.38742	3.22125
1.31444	2.04976
3.48707	3.50749	2.80585
2.68546	3.56156	2.32137
		0.230788
2.11502	2.97781	2.94369
0.602911	1.42532
1.99928	2.27294	3.46908
1.94406	2.49887	2.56956
2.39796	2.92019	3.23831
3.99098	3.72953	2.86196
2.84184	3.02327	1.9495
2.21855	2.51665	0.566083
3.5299	3.56485	2.39269
1.47638	2.11971	3.9065
2.79706	2.72113	3.71243
1.64746	1.65905	0.896809
2.17929	2.98569
2.36819	2.65398	2.15511
3.43338	3.55136	2.65801
3.90599	4.03219	3.44795
		1.78648
-0.133111	0.301895	1.99517
1.33093	2.18213
-0.166644	-0.625027	-1.62567
0.853559	1.17765	3.33522
0.770911	1.08532	2.63688
		3.51327
2.0793	3.13332
2.87443	3.02276
2.72653	3.03686
