# Supplementary material for: Quantitative proteomics reveals the selectivity of ubiquitin-binding autophagy receptors in the turnover of damaged lysosomes by lysophagy
Source: eLife. 2021 Sep 29;10:e72328. doi: 10.7554/eLife.72328 (PMC8523161; doi:10.7554/eLife.72328)
Supplement: Figure 3—source data 2. [file elife-72328-fig3-data2.xlsx]

## Sheet: 3G_GOProcess_Enrichment"Positiv
Positive regulation of TOR signaling	Regulation of TOR Signaling	Lysosome organization	Regulation of Autophagy
16.24	13.53	15.47	5
