# Supplementary material for: Quantitative proteomics reveals the selectivity of ubiquitin-binding autophagy receptors in the turnover of damaged lysosomes by lysophagy
Source: eLife. 2021 Sep 29;10:e72328. doi: 10.7554/eLife.72328 (PMC8523161; doi:10.7554/eLife.72328)
Supplement: Figure 4—source data 1. [file elife-72328-fig4-data1.xlsx]

## Sheet: figure 4 and 5 receptor MOC
TAX1BP1: 0hr	TAX1BP1: 1hr	TAX1BP1: 5hr	CALCOCO2: 0hr	CALCOCO2: 1hr	CALCOCO2: 4hr	OPTN: 0hr	OPTN: 1hr	OPTN: 5hr
0	0.363	0.749	0.006	0.024	0.042	0.001	0.022	0.062
0.004	0.469	0.451	0	0.024	0.12	0.001	0.073	0.052
0.001	0.452	0.734	0	0.038	0.058	0.002	0.021	0.028
0.003	0.547	0.638	0.001	0.039	0.062	0.008	0.047	0.03
0.007	0.281	0.43	0.005	0.088	0.031	0.001	0.045	0.041
0.01	0.564	0.443	0.003	0.071	0.029	0.006	0.026	0.047
0.002	0.225	0.422	0.005	0.066	0.034	0.008	0.023	0.039
0.007	0.444	0.648	0.011	0.054	0.044	0.004	0.038	0.021
0.014	0.373	0.11	0.004	0.029	0.116	0.003	0.043	0.015
0.002	0.246	0.627	0.002	0.019	0.093	0	0.013	0.021
0	0.542	0.563	0.003	0.165	0.137	0	0.016	0.016
0.004	0.044	0.402	0.001	0.045	0.275	0.001	0.018	0.013
0	0.025	0.389	0.015	0.054	0.219	0.006	0.022	0.038
0.028	0.081	0.435	0.013	0.026	0.381	0	0.01	0.021
0.011	0.288	0.526	0.022	0.051	0.303	0.002	0.013	0.044
0	0.157	0.473	0.016	0.036	0.344	0.001	0.024	0.011
0.006	0.083	0.493	0.011	0.058	0.29	0.002	0.035	0.025
0.004		0.459	0.005	0.048	0.304	0.011	0.009	0.046
0.006		0.449		0.065	0.277	0.016	0.004	0.049
0.011		0.585		0.07	0.228	0.003		0.013
		0.521			0.302	0.002		0.022
		0.683				0.003		0.024
						0.004
