# Supplementary material for: Quantitative proteomics reveals the selectivity of ubiquitin-binding autophagy receptors in the turnover of damaged lysosomes by lysophagy
Source: eLife. 2021 Sep 29;10:e72328. doi: 10.7554/eLife.72328 (PMC8523161; doi:10.7554/eLife.72328)
Supplement: Figure 5—source data 1. [file elife-72328-fig5-data1.xlsx]

## Sheet: figure 5 acidic keima puncta
12hr washout	12hr washout w BAFA	12hr washout w TBKi
5	0	2
0	0	0
0	0	2
0	0	5
6	0	0
21	0	2
10	0	0
0	0	0
3	0	2
0	0	0
1	0	0
0	0	2
0	0	1
13	0	1
43	0	1
30	0	0
10	0	1
34	0	2
39	0	4
5	0	0
0	0	0
21	0	0
10	0	1
3	0	0
39	0	0
0	0	0
0	0	2
26	0	0
22	0	1
24	0	0
13	0	1
27	0	2
33	0	0
42	0	2
0	0	0
0	0	0
16	0	0
5	0	0
25	0	0
44	0	0
1	0	0
1	0	0
9	0	0
0	0	0
0	0	0
1	0	0
0	0	0
30	0	0
10	0	0
16	0	0
8	0	1
0	0	0
8	0	0
4	0	0
12	0	0
0	0	5
1	0	0
0	0	0
3	0	3
4	0	2
1	0	1
1	0	0
2	0	0
0	0	0
17	0	0
5	0	3
0	0
9	0
43	0
	0
	0
	0
	0
	0
	0
	0
	0
	0
	0
	0
	0
	0
	0
