# Supplementary material for: Quantitative proteomics reveals the selectivity of ubiquitin-binding autophagy receptors in the turnover of damaged lysosomes by lysophagy
Source: eLife. 2021 Sep 29;10:e72328. doi: 10.7554/eLife.72328 (PMC8523161; doi:10.7554/eLife.72328)
Supplement: Figure 5—source data 2. [file elife-72328-fig5-data2.xlsx]

## Sheet: 5E_FACS
UT	LLoMe	LLoMe +Baf
1.02835	1.99485	1.09794
1.00515	1.92526	1.03608
0.966495	1.97165	1.02835
