# Supplementary material for: Quantitative proteomics reveals the selectivity of ubiquitin-binding autophagy receptors in the turnover of damaged lysosomes by lysophagy
Source: eLife. 2021 Sep 29;10:e72328. doi: 10.7554/eLife.72328 (PMC8523161; doi:10.7554/eLife.72328)
Supplement: Figure 5—source data 3. [file elife-72328-fig5-data3.xlsx]

## Sheet: 5F_FACS
UT	LLoMe	LLoMe +Tbk1i	LLoMe +Ulk1i	LLoMe+ E1i	LLoMe+p97i
0.981481	3.11111	1.71296	1.37963	1.09259	1.52778
1.02778	3.12037	1.75926	1.37037	1.02778	1.57407
0.990741	3	1.69444	1.46296	1.05556	1.55556
