# Supplementary material for: Quantitative proteomics reveals the selectivity of ubiquitin-binding autophagy receptors in the turnover of damaged lysosomes by lysophagy
Source: eLife. 2021 Sep 29;10:e72328. doi: 10.7554/eLife.72328 (PMC8523161; doi:10.7554/eLife.72328)
Supplement: Figure 5—source data 5. [file elife-72328-fig5-data5.xlsx]

## Sheet: Sheet1
TBK1: 0hr	TBK1: 1hr	TBK1: 5hr
0.006	0.233	0.414
0.001	0.128	0.366
0.002	0.104	0.304
0.001	0.172	0.357
0.043	0.051	0.531
0.008	0.226	0.495
0	0.292	0.477
0.001	0.333	0.458
0.041	0.202	0.129
0.001	0.142	0.431
0.004	0.183	0.157
0.004	0.148	0.233
0.038	0.104	0.056
0.005	0.049	0.056
0	0.064	0.15
0.002	0.1	0.165
0.013	0.051	0.089
0.015	0.028	0.153
0.001	0.106
0.004	0.054
0.037	0.002
0.011
0.005
