# Supplementary material for: Quantitative proteomics reveals the selectivity of ubiquitin-binding autophagy receptors in the turnover of damaged lysosomes by lysophagy
Source: eLife. 2021 Sep 29;10:e72328. doi: 10.7554/eLife.72328 (PMC8523161; doi:10.7554/eLife.72328)
Supplement: Figure 5—source data 6. [file elife-72328-fig5-data6.xlsx]

## Sheet: 5J_FACS
WT-UT	WT-LLoMe	ATG5-/- UT	ATG5-/- LLoMe	TBK1-/- UT	TBK1-/- LLoMe
0.996289	2.17625	1.00195	1.125	1.01508	1.15578
0.979592	2.13173	0.990234	1.11328	0.994975	1.13568
1.02412	2.26531	1.00781	1.07227	0.98995	1.13568
