# Supplementary material for: Quantitative proteomics reveals the selectivity of ubiquitin-binding autophagy receptors in the turnover of damaged lysosomes by lysophagy
Source: eLife. 2021 Sep 29;10:e72328. doi: 10.7554/eLife.72328 (PMC8523161; doi:10.7554/eLife.72328)
Supplement: Figure 6—source data 1. [file elife-72328-fig6-data1.xlsx]

## Sheet: 6A_FACS
WT UT	WT LLoMe	ATG5-/- UT	ATG5-/ +LLoMe	TKO UT	TKO LLoMe
0.996289	2.17625	1.00195	1.125	0.99811	1.1569
0.979592	2.13173	0.990234	1.11328	1.01512	1.17391
1.02412	2.26531	1.00781	1.07227	0.986767	1.13422
