# Supplementary material for: Quantitative proteomics reveals the selectivity of ubiquitin-binding autophagy receptors in the turnover of damaged lysosomes by lysophagy
Source: eLife. 2021 Sep 29;10:e72328. doi: 10.7554/eLife.72328 (PMC8523161; doi:10.7554/eLife.72328)
Supplement: Figure 6—source data 2. [file elife-72328-fig6-data2.xlsx]

## Sheet: 6B_FACS
WT			GFP		GFP CALCOCO2		GFP OPTN		GFP TAX1BP1
UT	LLoMe	LLoMe +Baf	UT	+LLoMe	UT	LLoMe	UT	LLoMe	UT	LLoMe
0.977444	2.54887	0.947368	1.00532	1.17287	1	1.27083	1.01828	1.69974	1.02145	2.10724
1.01504	2.6015	0.954887	0.99734	1.17287	0.989583	1.25	1.00261	1.75457	0.97319	2.0429
1.00752	2.55639	0.969925	0.99734	1.17287	1.01042	1.3125	0.979112	1.69974	1.00536	1.99464
