# Supplementary material for: Quantitative proteomics reveals the selectivity of ubiquitin-binding autophagy receptors in the turnover of damaged lysosomes by lysophagy
Source: eLife. 2021 Sep 29;10:e72328. doi: 10.7554/eLife.72328 (PMC8523161; doi:10.7554/eLife.72328)
Supplement: Figure 6—source data 3. [file elife-72328-fig6-data3.xlsx]

## Sheet: 6D_FACS
WT		ATG7-/-		TAX1BP1-/-		OPTN-/-		CALCOCO2		SQSTM1
UT	LLoMe	UT	LLoMe	UT	LLoMe	UT	LLoMe	UT	LLoMe	UT	LLoMe
1.01156	1.59538	0.992908	1.01418	0.991935	1.05847	0.981595	1.46626	0.990458	1.32252	0.997908	1.58159
0.971098	1.5896	1.0106	1.01418	1.00403	1.04032	1.04294	1.45399	1.01336	1.26527	1.02301	1.60669
1.01734	1.45665	1	1.01418	1.00403	1.03427	0.97546	1.47239	0.996183	1.26527	0.979079	1.58787
