# Supplementary material for: Quantitative proteomics reveals the selectivity of ubiquitin-binding autophagy receptors in the turnover of damaged lysosomes by lysophagy
Source: eLife. 2021 Sep 29;10:e72328. doi: 10.7554/eLife.72328 (PMC8523161; doi:10.7554/eLife.72328)
Supplement: Figure 6—source data 4. [file elife-72328-fig6-data4.xlsx]

## Sheet: figure 6 gal3 clearance
WT	TAX1BP1 -/-	OTPN -/-	NDP52 -/-	p62 -/-				TAX1BP1 -/-	TAX1BP1 -/-
1	16	4	3	0			WT	plus GFP	plus GFP-TAX1BP1
8	19	2	1	5			2	23	1
0	22	4	5	7			5	32	1
0	19	3	1	2			3	2	2
2	51	6	6	10			0	17	0
0	35	3	13	0			3	7	0
0	34	6	3	5			0	8	0
0	29	6	3	2			16	12	2
5	17	6	2	6			3	0	0
1	32	4	3	4			5	25	13
0	63	2	4	0			2	6	9
2	24	2	11	5			3	3	0
1	11	5	0	7			0	20	1
1	16	5	1	8			1	7	6
2	9	1	5	10			2	23	1
2	4	1	2	8			2	2	2
3	9	0	1	1			3	52	5
5	6	9	3	13			5	73	8
7	9	1	1	2			9	14	14
5	0	2	4	2			3	41	0
7	22	0	1	2			2	20	5
5		14		3			1	4	1
1		3		2			1	17	0
9		7		11			31	14	24
10		10		0			2	6	8
4				10			2	37	20
3				3			3	14	7
6							5	49	6
5							7	21	4
							5		1
									27
									9
									5
