# Supplementary material for: Quantitative proteomics reveals the selectivity of ubiquitin-binding autophagy receptors in the turnover of damaged lysosomes by lysophagy
Source: eLife. 2021 Sep 29;10:e72328. doi: 10.7554/eLife.72328 (PMC8523161; doi:10.7554/eLife.72328)
Supplement: Figure 7—figure supplement 1—source data 1. [file elife-72328-fig7-figsupp1-data1.xlsx]

## Sheet: figure s7 r186s
	GFP puncta			RFP puncta	RFP puncta
R186S_0hr	R186S_1hr	R186S_1hr_12hr wo		WT_0hr	R186S_0hr
0	0	2		28	13
1	1	1		12	30
1	0	0		0	8
0	1	1		13	31
0	1	1		23	1
0	0	1		3	13
0	0	0		31	8
1	0	0		22	28
0	0	0		19	18
0	1	0		11	4
0	0	1		11	18
1	0	1		19	26
1	0	0		43	32
1	2	0		43	6
2	1	0		54	25
0	1	0		34	38
0	0	0		28	5
0	1	0		57	11
1	1			23	45
0				40	27
0				32	37
0				54	42
				39
				22
