# Supplementary material for: Quantitative proteomics reveals the selectivity of ubiquitin-binding autophagy receptors in the turnover of damaged lysosomes by lysophagy
Source: eLife. 2021 Sep 29;10:e72328. doi: 10.7554/eLife.72328 (PMC8523161; doi:10.7554/eLife.72328)
Supplement: Figure 7—source data 1. [file elife-72328-fig7-data1.xlsx]

## Sheet: figure 7 iN
WT 0Hr	WT 1hr	WT 1hr_12hr wo
0	12	1
0	5	0
0	3	1
0	13	2
0	14	0
0	0	1
1	3	0
0	1	0
0	15	1
0	7	0
0	5	0
0	13	2
1	2	0
1	10	4
0	8	0
1	0	1
0	4	0
0	0	1
1	3	0
0	18	0
0	5	0
0	5	0
0	8	2
1	5	0
1	2	1
0	2	1
0	12	3
0	5	0
1	10	1
1	0	0
0	4	0
1	9	0
0	2	1
1	2	0
1	2	0
0	0	0
0	0	0
0	5	1
0	11	1
0	3	1
0	16	1
0	18	0
0	22	0
1	10	0
0	5	0
	2	1
	0	0
	0	2
	11	1
	9	2
	1	0
	18	0
	5	0
	10	0
		0
	0	0
		0
		0
		0
		0
		1
		0
		5
		1
		0
		3
