# Supplementary material for: Quantitative proteomics reveals the selectivity of ubiquitin-binding autophagy receptors in the turnover of damaged lysosomes by lysophagy
Source: eLife. 2021 Sep 29;10:e72328. doi: 10.7554/eLife.72328 (PMC8523161; doi:10.7554/eLife.72328)
Supplement: Figure 7—source data 2. [file elife-72328-fig7-data2.xlsx]

## Sheet: figure 7 inhibitors
WT 1hr_12hr wo	WT 1hr_12hr wowTBKi	WT 1hr_12hr wo w vps34i	WT 1hr_12hr wo w vBAFA
1	0	7	16
0	0	25
1	1	36	2
2	0	11	4
0	0	12	1
1	0	0	6
0	19	36	4
0	2	13	2
1	7	26	1
0	9	1	10
0	2	0	4
2	5	2	3
0	4	0	7
4	21	15	1
0	7	6	16
1	20	19	1
0	0	6	4
1	1	16	0
0	0	5	6
0	2	3	1
0	2	14	3
0	0	2	4
2	1	0	15
0	0	36	8
1	2	3	2
1	2	9	13
3	13	11	11
0	16	29	2
1	5	10	8
0	4	13	5
0	7	29	0
0	6	1	9
1	10	29	0
0	19	3	17
0	2	1	8
0	4	3	1
0	15	18	9
1	6	2	5
1	3	3	5
1	3	17	6
1	1	15	4
0	13	4	0
0	1	10	0
0	0	25	11
0	3		5
1	21		0
0	7		2
2	8		6
1	18		4
2	0		0
0	1
0	1
0	22
0	0
0	16
0	4
0	13
0	1
0	0
0	2
1	3
0	2
5	11
1
0
3
