# Supplementary material for: Quantitative proteomics reveals the selectivity of ubiquitin-binding autophagy receptors in the turnover of damaged lysosomes by lysophagy
Source: eLife. 2021 Sep 29;10:e72328. doi: 10.7554/eLife.72328 (PMC8523161; doi:10.7554/eLife.72328)
Supplement: Figure 7—source data 3. [file elife-72328-fig7-data3.xlsx]

## Sheet: figure 7 tax1bp1optn ko (
WT 1hr_12hr	TAX1ko_1hr_12hr wo	TAX1OPTNko_1hr_12hr wo
1	4	5
1	2	0
0	11	16
1	5	5
0	6	0
1	0	1
0	0	9
0	1	1
0	12	0
0	1	10
1	0	3
1	0	6
1	2	2
0	0	6
0	14	1
0	1	4
0	1	0
0	4	0
0	0	3
0	0	0
1	2	5
0	0	16
0	10	7
2	0	0
0	5	3
0	19	0
1	1	0
3	9	16
3	0	0
0	0	10
0	0	0
0	0	2
0	8	2
0	5	2
0	10	0
0	1	1
0	0	13
	0	3
	0	5
	16
	3
	11
	0
	5
	3
	2
	1
	3
	13
	17
	16
	2
	16
	1
