# Supplementary material for: Quantitative proteomics reveals the selectivity of ubiquitin-binding autophagy receptors in the turnover of damaged lysosomes by lysophagy
Source: eLife. 2021 Sep 29;10:e72328. doi: 10.7554/eLife.72328 (PMC8523161; doi:10.7554/eLife.72328)
Supplement: Figure 8—figure supplement 1—source data 1. [file elife-72328-fig8-figsupp1-data1.xlsx]

## Sheet: figure s8 MOC receptor inhib.
TAX1BP1: LLoMe	TAX1BP1: LLoMe E1i	TAX1BP1: TBKi	TAX1BP1: p97i
0.638367	0	0.68047	0.707097
0.675616	0.133368	0.214654	0.794169
0.54162	0	1	0.734214
0.686781	0.0478413	0.965954	0.599731
0.881674	0.0848887	0.51519	0.404492
0.258826	0	0	0.32449
0.251182	0.0860048	0.763191	0.691825
0.53916	0	0.683051	0.473765
0.721344	0	0.16886	0.785902
0.688517	0	0.772895	0.568999
0.64612	0.135144	0.51203	0.512872
0.578346	0	0	0.492596
0.261884	0	0.588357	0.68995
0.193619	0.132575	0.53617	0.517751
0.499103	0.00701128	0.677145	0.308737
0.342857	0.0236749	0.0997285	0.44434
0.138074	0.0637346	0.84619	0.175594
0.608563	0	0.673703	0.376719
0.524288	0.0535512	0.783437	0.630718
0.471081	0	0.605917	0.50525
0.458038	0.0312202	0.64254	0.651182
0.332761	0	0.631579	0.3962
0.441699	0.265543	0.68489	0.341965
0.150883	0.0164319	0.456379	0.479977
	0.194313	0	0.259532
