# Supplementary material for: Quantitative proteomics reveals the selectivity of ubiquitin-binding autophagy receptors in the turnover of damaged lysosomes by lysophagy
Source: eLife. 2021 Sep 29;10:e72328. doi: 10.7554/eLife.72328 (PMC8523161; doi:10.7554/eLife.72328)
Supplement: Figure 8—source data 1. [file elife-72328-fig8-data1.xlsx]

## Sheet: 8C_FACS
	TKO
	GFP-TAX1BP1		GFP		632-639		Y635A		N637A		V192S		Q770A E774K		1-140		A114Q		CC1		CC2		CC3
	UT	LLoMe	UT	LLoMe	UT	LLoMe	UT	LLoMe	UT	LLoMe	UT	LLoMe	UT	LLoMe	UT	LLoMe	UT	LLoMe	UT	LLoMe	UT	LLoMe	UT	LLoMe
	0.991304	2.33478	1.02391	1.29783	0.978261	2.96739	0.971739	2.91522	1.01739	3.11087	1.10217	2.17174	1.08261	1.86522	1.04348	1.06304	1.06304	1.45435	1.16739	2.36739	1.22609	2.71304	1.21304	3.23478
	1.00435	2.38043	1.06304	1.32391	0.965217	2.85	0.971739	2.98043	1.04348	3.10435	1.1087	2.20435	1.06304	1.85217	1.06304	1.05652	1.07609	1.52609	1.21304	2.33478	1.25217	2.63478	1.19348	3.13696
	1.00435	2.42609	1.10217	1.30435	0.984783	2.96087	0.965217	2.92826	1.05	3.07826	1.12826	2.26957	1.08913	1.84565	1.03696	1.05	1.07609	1.53913	1.18043	2.46522	1.25217	2.77174	1.22609	3.25435
