# Supplementary material for: Quantitative proteomics reveals the selectivity of ubiquitin-binding autophagy receptors in the turnover of damaged lysosomes by lysophagy
Source: eLife. 2021 Sep 29;10:e72328. doi: 10.7554/eLife.72328 (PMC8523161; doi:10.7554/eLife.72328)
Supplement: Figure 8—source data 2. [file elife-72328-fig8-data2.xlsx]

## Sheet: 8E_FACS
TKO
GFP OPTN		GFP		S513A		S473A S513A		E50K
UT	LLoMe	UT	LLoMe	UT	LLoMe	UT	LLoMe	UT	LLoMe
0.995192	2.49038	0.984127	0.973545	0.983607	2.75956	0.994709	2.77778	1.04444	2.58889
1	2.5625	0.994709	0.957672	0.989071	2.74317	1.03175	2.7672	0.988889	2.53333
1.00481	2.5625	1.02116	0.994709	1.02732	2.74317	0.973545	2.7037	0.966667	2.6
