# Supplementary material for: Quantitative proteomics reveals the selectivity of ubiquitin-binding autophagy receptors in the turnover of damaged lysosomes by lysophagy
Source: eLife. 2021 Sep 29;10:e72328. doi: 10.7554/eLife.72328 (PMC8523161; doi:10.7554/eLife.72328)
Supplement: Supplementary file 1. — See Supplementary file 6 for details. [file elife-72328-supp1.xlsx]

## Sheet: Experiment info
			Category	Settings
			mass spectrometer	Orbitrap Fusion
			quantification mode	SPS-MS3
			LC
			Model	nLC-1000
			Column	Accucore150 resin (2.6 μm, 150 Å)
			Flow rate	475 nL/min
			Gradient	5-24%
			Method length	150 min
			FAIMS
			CVs	none
			Mono. Peak assignment	yes
			MS1
			Detector	Orbitrap
			Resolution at 200Th	120000
			Mass range	350-1400
			AGC target	400000
			Max. ion time	50
			Dynamic Exclusion	7ppm, 120 ms
			MS2
			No. Dependnet Scans	10
			Detector	ion trap
			Scan rate	turbo
			Collision Energy	CID, 35%
			AGC target	10000
			Max. ion time	60 ms
			isolaton window	0.7
			MS3
			No. SPS ions	10
			Detector	Orbitrap
			Resolution	17500
			Collision Energy	HCD 65
			AGC target	100K
			Max. ion time	150ms

## Sheet: LysoIP-TMEM192 3xHA-NegControl
Protein Id	Gene Symbol (3849)	Description	Number of peptides	CONTROL	CONTROL	CONTROL	CONTROL avg	TMEM192	TMEM192	TMEM192	TMEM192 avg	TMEM192:Control	p-value	log2 TMEM192:Control	log10 p-value		ER (551)	ERGIC (42)	Golgi (357)	Lysosome (179)	Mitochondria (803)	Plasma Membrane (1976)	Endosome (166)	Peroxisome (63)	Nucleus (2975)	Cytoplasm (886)	AUTOPHAGY (79)	mTOR/AMPK (78)	ESCRT (31)
sp|Q13093|PAFA_HUMAN	PLA2G7	PAFA_HUMAN Platelet-activating factor acetylhydrolase	1	0	3.20814	4.41318	2.54044	85.2786	98.5367	89.0263	90.9472	35.7998	2.89847e-05	5.16188	4.53783										ZCCHC8
sp|Q06033|ITIH3_HUMAN	ITIH3	ITIH3_HUMAN Inter-alpha-trypsin inhibitor heavy chain H3	3	11.9859	9.90998	13.6107	11.8355	366.712	394.6	351.349	370.887	31.3367	9.32545e-06	4.96978	5.03033							SLC1A3			PRAC1
sp|P07093|GDN_HUMAN	SERPINE2	GDN_HUMAN Glia-derived nexin	1	4.35597	3.20021	3.8112	3.78913	83.2698	90.6589	82.5616	85.4968	22.5637	6.21035e-06	4.49593	5.20688
sp|Q14956|GPNMB_HUMAN	GPNMB	GPNMB_HUMAN Transmembrane glycoprotein NMB	4	22.2563	18.148	15.1805	18.5283	364.906	458.681	402.154	408.58	22.0517	0.000140158	4.46282	3.85338							OTOP1			NPAT
sp|O60637|TSN3_HUMAN	TSPAN3	TSN3_HUMAN Tetraspanin-3	6	40.7197	36.7914	41.8538	39.7883	669.572	1065.97	865.145	866.896	21.7877	0.00194437	4.44544	2.71122
sp|P32320|CDD_HUMAN	CDA	CDD_HUMAN Cytidine deaminase	2	5.95693	12.6778	8.74903	9.12791	150.112	210.954	175.386	178.817	19.5902	0.000669452	4.29206	3.17428		UGT1A9				NDUFS7	GPR156			FAM118B	NFKBIE
sp|Q9NY33|DPP3_HUMAN	DPP3	DPP3_HUMAN Dipeptidyl peptidase 3	1	0	2.43178	1.46472	1.29883	24.089	20.5372	23.0158	22.5473	17.3597	7.41339e-05	4.11767	4.12998							OR10A7			JARID2
sp|P08697|A2AP_HUMAN	SERPINF2	A2AP_HUMAN Alpha-2-antiplasmin	2	11.2218	10.2253	10.2496	10.5656	191.322	161.666	182.55	178.513	16.8957	4.44483e-05	4.07858	4.35214
sp|P07093-3|GDN_HUMAN	SERPINE2	GDN_HUMAN Isoform 3 of Glia-derived nexin	28	176.567	196.316	187.212	186.698	2498.44	2986.17	2839.13	2774.58	14.8613	5.72262e-05	3.89349	4.2424
sp|P08962|CD63_HUMAN	CD63	CD63_HUMAN CD63 antigen	5	13.8213	23.0913	16.6606	17.8578	329.41	199.342	248.551	259.101	14.5091	0.00315852	3.85889	2.50052		UBE2J1				NDUFB8	GPR139			ETV6	NBPF9
sp|P04406|G3P_HUMAN	GAPDH	G3P_HUMAN Glyceraldehyde-3-phosphate dehydrogenase	203	1410.26	1536.21	1417	1454.49	19028.3	18682	21150.3	19620.2	13.4894	1.94039e-05	3.75375	4.71211							OR5H1			NAT10
sp|P02792|FRIL_HUMAN	FTL	FRIL_HUMAN Ferritin light chain	3	25.088	30.6328	22.8948	26.2052	305.93	395.216	296.124	332.424	12.6854	0.000635279	3.6651	3.19704							OR52W1			MYCL
sp|Q13867|BLMH_HUMAN	BLMH	BLMH_HUMAN Bleomycin hydrolase	23	230.573	230.588	221.602	227.588	2670.59	3011.88	2893.76	2858.74	12.5611	1.24531e-05	3.65089	4.90472		PTPN2		ZFPL1		MIPEP	DRP2			DHX16	GSTM5
sp|P48637|GSHB_HUMAN	GSS	GSHB_HUMAN Glutathione synthetase	5	60.6831	49.4544	49.9509	53.3628	604.338	775.092	605.391	661.607	12.3983	0.000432732	3.63207	3.36378							PCDH10			NSMCE2
sp|P25774|CATS_HUMAN	CTSS	CATS_HUMAN Cathepsin S	6	54.8883	51.8375	53.122	53.2826	597.684	679.489	616.965	631.38	11.8496	1.97746e-05	3.56677	4.70389						TSPO	LRP4			HIST1H2BB	SPSB4
sp|Q9BXW9|FACD2_HUMAN	FANCD2	FACD2_HUMAN Fanconi anemia group D2 protein	1	6.79146	5.04015	4.40076	5.41079	55.2179	68.5833	68.1474	63.9829	11.8251	0.000191111	3.56378	3.71871							OR4K13			MESP2
sp|Q8N682|DRAM1_HUMAN	DRAM1	DRAM1_HUMAN DNA damage-regulated autophagy modulator protein 1	2	13.9688	11.5781	14.0634	13.2034	141.258	162.525	162.748	155.511	11.7781	3.80758e-05	3.55803	4.41935							OR10D4P			JUN
sp|P00441|SODC_HUMAN	SOD1	SODC_HUMAN Superoxide dismutase [Cu-Zn]	10	117.437	134.136	103.6	118.391	1329.65	1372.44	1418.46	1373.52	11.6015	1.30378e-06	3.53624	5.8848
sp|Q5JS37|NHLC3_HUMAN	NHLRC3	NHLC3_HUMAN NHL repeat-containing protein 3	7	73.4552	64.6292	61.065	66.3832	684.437	757.339	747.224	729.667	10.9917	8.75277e-06	3.45835	5.05785										TCOF1
sp|O43934|MFS11_HUMAN	MFSD11	MFS11_HUMAN UNC93-like protein MFSD11	2	20.3827	16.0954	13.8023	16.7601	168.871	215.497	166.578	183.649	10.9575	0.000483567	3.45384	3.31554							TRBC2			SCRT1
sp|Q9UGQ3|GTR6_HUMAN	SLC2A6	GTR6_HUMAN Solute carrier family 2, facilitated glucose transporter member 6	4	45.1004	52.451	50.4589	49.3368	520.573	581.099	515.147	538.94	10.9237	2.1033e-05	3.44939	4.6771
sp|O43653|PSCA_HUMAN	PSCA	PSCA_HUMAN Prostate stem cell antigen	1	8.22064	8.71723	8.96529	8.63439	87.6873	102.725	89.0394	93.1504	10.7883	6.15055e-05	3.4314	4.21109										ZNF266
sp|Q9H6D7|HAUS4_HUMAN	HAUS4	HAUS4_HUMAN HAUS augmin-like complex subunit 4	1	18.3452	7.75957	7.35263	11.1525	109.222	131.73	114.977	118.643	10.6383	0.000148875	3.41119	3.82718							PCDHB13			OLIG1
sp|P80188|NGAL_HUMAN	LCN2	NGAL_HUMAN Neutrophil gelatinase-associated lipocalin	1	5.46161	3.84563	3.43866	4.24863	40.0884	50.347	44.3513	44.9289	10.5749	0.000180096	3.40257	3.7445							SLCO2A1			RBL1
sp|Q9NS93|TM7S3_HUMAN	TM7SF3	TM7S3_HUMAN Transmembrane 7 superfamily member 3	10	105.139	123.209	112.411	113.587	1152.51	1266.55	1172.87	1197.31	10.5409	6.86318e-06	3.39793	5.16347
sp|P13473-2|LAMP2_HUMAN	LAMP2	LAMP2_HUMAN Isoform LAMP-2B of Lysosome-associated membrane glycoprotein 2	17	96.7267	97.3573	90.6527	94.9122	961.407	1046.02	950.965	986.129	10.3899	7.82046e-06	3.37711	5.10677							SLC6A3			RAD54B
sp|P01008|ANT3_HUMAN	SERPINC1	ANT3_HUMAN Antithrombin-III	6	63.4313	37.3906	37.9473	46.2564	480.972	485.534	454.479	473.662	10.2399	5.0137e-06	3.35613	5.29984
sp|O43504|LTOR5_HUMAN	LAMTOR5	LTOR5_HUMAN Ragulator complex protein LAMTOR5	3	19.8488	18.6201	16.467	18.312	156.896	206.207	194.584	185.895	10.1516	0.000357458	3.34363	3.44678							SLC7A6			RALY
sp|P01023|A2MG_HUMAN	A2M	A2MG_HUMAN Alpha-2-macroglobulin	25	256.227	246.532	240.847	247.869	2275.07	2728.6	2506.41	2503.36	10.0995	6.67861e-05	3.33622	4.17531		AADAC	ATP6AP1	A3GALT2	ABCA3	AADAT	AAK1	ABHD17C	ABCD2	AATF	AACS	ALFY	AKT1S1	CHMP1A
sp|O00560|SDCB1_HUMAN	SDCBP	SDCB1_HUMAN Syntenin-1	15	99.9428	87.4461	89.6124	92.3337	856.558	995.898	942.022	931.493	10.0883	3.28461e-05	3.33461	4.48352										ZNF93
sp|P35237|SPB6_HUMAN	SERPINB6	SPB6_HUMAN Serpin B6	32	256.764	260.183	233.903	250.283	2201.37	2707.89	2507.24	2472.17	9.87749	0.000113181	3.30414	3.94623
sp|Q86T03-2|TM55B_HUMAN	TMEM55B	TM55B_HUMAN Isoform 2 of Type 1 phosphatidylinositol 4,5-bisphosphate 4-phosphatase	10	61.3808	60.7799	70.4456	64.2021	507.468	713.801	679.883	633.717	9.87066	0.000879014	3.30315	3.056
sp|P04062|GLCM_HUMAN	GBA	GLCM_HUMAN Glucosylceramidase	40	445.917	460.291	431.293	445.834	4137.25	4314.35	4396.72	4282.77	9.60621	9.70671e-07	3.26397	6.01293							OR5I1			NCAPH2
sp|Q7Z2H8|S36A1_HUMAN	SLC36A1	S36A1_HUMAN Proton-coupled amino acid transporter 1	1	6.46634	8.48182	8.80212	7.91676	75.1547	80.838	70.4924	75.495	9.5361	2.55148e-05	3.2534	4.59321
sp|Q8IZP9|GPR64_HUMAN	GPR64	GPR64_HUMAN G-protein coupled receptor 64	2	11.2821	14.4014	11.4609	12.3815	109.792	124.618	110.459	114.956	9.28453	3.17683e-05	3.21483	4.49801							P2RX2			NR1I2
sp|O60287|NPA1P_HUMAN	URB1	NPA1P_HUMAN Nucleolar pre-ribosomal-associated protein 1	1	14.8728	12.4355	14.8658	14.058	117.124	132.3	136.675	128.699	9.15488	4.36112e-05	3.19454	4.3604
sp|O43657|TSN6_HUMAN	TSPAN6	TSN6_HUMAN Tetraspanin-6	7	52.3429	55.6628	41.1054	49.7037	474.298	450.165	436.612	453.692	9.12793	4.44376e-06	3.19029	5.35225
sp|P04440|DPB1_HUMAN	HLA-DPB1	DPB1_HUMAN HLA class II histocompatibility antigen, DP beta 1 chain	2	13.1692	15.6849	11.839	13.5644	116.951	119.391	122.884	119.742	8.82767	8.44883e-07	3.14203	6.0732							PERP			PAX6
sp|Q9H6Y7|RN167_HUMAN	RNF167	RN167_HUMAN E3 ubiquitin-protein ligase RNF167	1	2.76514	4.44352	1.97847	3.06238	25.8074	29.3312	25.3291	26.8225	8.75874	8.26019e-05	3.13072	4.08301										ZNF624
sp|Q6UX65|DRAM2_HUMAN	DRAM2	DRAM2_HUMAN DNA damage-regulated autophagy modulator protein 2	2	49.1779	43.9214	39.7085	44.2693	398.256	364.31	392.344	384.97	8.69609	6.06812e-06	3.12037	5.21695							OR10G2			JUNB
sp|P60174|TPIS_HUMAN	TPI1	TPIS_HUMAN Triosephosphate isomerase	25	288.998	271.136	266.227	275.454	2071.86	2681.15	2268.48	2340.5	8.49688	0.000327141	3.08693	3.48526
sp|Q9NUN5|LMBD1_HUMAN	LMBRD1	LMBD1_HUMAN Probable lysosomal cobalamin transporter	1	9.74798	8.77139	8.30672	8.94203	75.4298	79.2107	71.8819	75.5074	8.4441	6.58399e-06	3.07794	5.18151							SUSD2			RBMY1D
sp|Q9H2V7|SPNS1_HUMAN	SPNS1	SPNS1_HUMAN Protein spinster homolog 1	8	88.4538	88.6362	83.0013	86.6971	690.757	808.726	695.149	731.544	8.43793	7.5658e-05	3.07689	4.12115
sp|Q13286|CLN3_HUMAN	CLN3	CLN3_HUMAN Battenin	6	77.0359	78.9751	71.3582	75.7897	615.623	663.081	624.691	634.465	8.37139	2.88135e-06	3.06547	5.5404						RHOT1	HLA-H			FSBP	PITPNA
sp|Q96SL1|DIRC2_HUMAN	DIRC2	DIRC2_HUMAN Disrupted in renal carcinoma protein 2	4	24.0849	23.3497	25.5192	24.3179	193.701	221.896	191.642	202.413	8.32361	5.34912e-05	3.05721	4.27172							NLGN3			ID3	YARS1
sp|Q15012|LAP4A_HUMAN	LAPTM4A	LAP4A_HUMAN Lysosomal-associated transmembrane protein 4A	2	16.5221	12.8826	16.2253	15.21	97.521	138.651	138.94	125.037	8.22075	0.00135327	3.03927	2.86862							SLC8A1			RASL11A
sp|Q6NT16|S18B1_HUMAN	SLC18B1	S18B1_HUMAN MFS-type transporter SLC18B1	3	35.1802	34.3606	35.1519	34.8976	253.324	309.091	290.655	284.357	8.14832	0.000109079	3.0265	3.96226
sp|P13798|ACPH_HUMAN	APEH	ACPH_HUMAN Acylamino-acid-releasing enzyme	30	259.652	278.609	233.171	257.144	2041.47	2090.03	2137.99	2089.83	8.12708	4.79041e-07	3.02274	6.31963		FKBP7		GPR89B		CYC1	CD47			CCNB1IP1	CLNK
sp|O60931-2|CTNS_HUMAN	CTNS	CTNS_HUMAN Isoform 2 of Cystinosin	1	10.3191	7.95967	7.90382	8.72753	74.4848	72.4608	65.0064	70.6506	8.09514	3.21097e-05	3.01706	4.49336						TOP3A	LMBRD2			HIC1	SPRR1B
sp|Q13501|SQSTM_HUMAN	SQSTM1	SQSTM_HUMAN Sequestosome-1	24	190.839	149.458	158.343	166.214	1198.7	1258.41	1552.31	1336.47	8.04069	0.000442154	3.00732	3.35443
sp|P04114|APOB_HUMAN	APOB	APOB_HUMAN Apolipoprotein B-100	13	117.324	102.816	104.26	108.133	900.293	865.819	831.73	865.948	8.00814	3.08883e-06	3.00147	5.51021		FMO5		HS3ST4		CYP27B1	CD79B			CCNK	CPEB2
sp|Q9BZH6|WDR11_HUMAN	WDR11	WDR11_HUMAN WD repeat-containing protein 11	3	27.751	25.9881	27.2514	26.9968	240.797	186.93	220.614	216.114	8.00517	0.000273762	3.00093	3.56263
sp|Q13228|SBP1_HUMAN	SELENBP1	SBP1_HUMAN Selenium-binding protein 1	15	151.563	142.654	136.124	143.447	1115.79	1133.59	1185.32	1144.9	7.98134	1.23065e-06	2.99663	5.90986										ZSCAN5DP
sp|P07339|CATD_HUMAN_contaminant	CTSD	CATD_HUMAN_contaminant Cathepsin D	56	636.702	721.049	662.38	673.377	5058.09	5610.65	5088.24	5252.33	7.79998	1.45299e-05	2.96347	4.83774						TRNT1	LRFN2			HIST1H2AA	SPRR3
sp|O15118|NPC1_HUMAN	NPC1	NPC1_HUMAN Niemann-Pick C1 protein	26	246.202	260.955	255.709	254.289	1876.72	2122.32	1918.02	1972.35	7.75634	2.27365e-05	2.95538	4.64328										TIAF1
sp|O00560-2|SDCB1_HUMAN	SDCBP	SDCB1_HUMAN Isoform 2 of Syntenin-1	1	7.86117	5.48217	6.7916	6.71165	51.0148	55.4135	49.5091	51.9791	7.74461	1.84137e-05	2.95319	4.73486										ZNF98
sp|Q6P1K1|HRG1_HUMAN	SLC48A1	HRG1_HUMAN Heme transporter HRG1	2	25.0474	31.0978	26.8583	27.6679	197.627	227.795	216.587	214.003	7.73472	3.19407e-05	2.95135	4.49566
sp|O15162|PLS1_HUMAN	PLSCR1	PLS1_HUMAN Phospholipid scramblase 1	2	21.7797	28.587	22.2464	24.2044	183.507	193.878	183.237	186.874	7.72068	2.4923e-06	2.94873	5.6034										ZFP69
sp|P15144|AMPN_HUMAN	ANPEP	AMPN_HUMAN Aminopeptidase N	57	485.228	509.412	476.657	490.432	3629.45	3896.28	3828.46	3784.73	7.71713	2.14878e-06	2.94806	5.66781		ERMARD		GOLGA3	TM6SF1	COX6A2	CCRL2	ZFYVE9		CAND2	CCT7
sp|P38571|LICH_HUMAN	LIPA	LICH_HUMAN Lysosomal acid lipase/cholesteryl ester hydrolase	10	116.065	131.702	124.154	123.973	898.134	1049.38	912.769	953.428	7.69058	6.78599e-05	2.94309	4.16839							STK32A			RBMXL1
sp|Q14108|SCRB2_HUMAN	SCARB2	SCRB2_HUMAN Lysosome membrane protein 2	36	561.23	566.818	529.408	552.485	4058.67	4323.53	4220.05	4200.75	7.60337	1.24615e-06	2.92664	5.90443										ZNF852
sp|O14494-2|LPP1_HUMAN	PPAP2A	LPP1_HUMAN Isoform 2 of Lipid phosphate phosphohydrolase 1	2	28.0637	25.905	29.701	27.8899	182.575	226.494	226.36	211.81	7.5945	0.000232192	2.92495	3.63415										ZNF106
sp|P30740|ILEU_HUMAN	SERPINB1	ILEU_HUMAN Leukocyte elastase inhibitor	12	104.414	98.3157	91.5074	98.079	714.668	807.693	712.037	744.799	7.59387	3.39854e-05	2.92484	4.46871
sp|Q9BTU6|P4K2A_HUMAN	PI4K2A	P4K2A_HUMAN Phosphatidylinositol 4-kinase type 2-alpha	22	169.506	155.853	163.655	163.005	1123.03	1332.44	1245.79	1233.76	7.56883	6.13715e-05	2.92007	4.21203										ZBTB45
sp|Q8IV08|PLD3_HUMAN	PLD3	PLD3_HUMAN Phospholipase D3	17	120.557	142.705	130.02	131.094	921.489	1067.01	980.253	989.583	7.54866	3.62928e-05	2.91622	4.44018										ZFP1
sp|P01903|DRA_HUMAN	HLA-DRA	DRA_HUMAN HLA class II histocompatibility antigen, DR alpha chain	8	108.853	112.582	97.2322	106.223	805.086	775.769	814.284	798.379	7.5161	6.36664e-07	2.90999	6.19609							PHEX			PAX7
sp|Q9NVA4|T184C_HUMAN	TMEM184C	T184C_HUMAN Transmembrane protein 184C	2	27.387	21.1176	22.7736	23.7594	169.538	188.034	177.338	178.303	7.50453	1.0847e-05	2.90776	4.96469
sp|Q95IE3|2B1C_HUMAN	HLA-DRB1	2B1C_HUMAN HLA class II histocompatibility antigen, DRB1-12 beta chain	3	23.5982	26.5726	26.4384	25.5364	182.577	198.291	188.018	189.629	7.42581	4.04501e-06	2.89255	5.39308							PKD1L1			PAX9
sp|Q04756|HGFA_HUMAN	HGFAC	HGFA_HUMAN Hepatocyte growth factor activator	4	47.1013	41.9446	44.2826	44.4428	307.014	347.166	330.054	328.078	7.38203	1.73401e-05	2.88402	4.76095							PCDHGA2			OVOL1
sp|Q9Y2Q5|LTOR2_HUMAN	LAMTOR2	LTOR2_HUMAN Ragulator complex protein LAMTOR2	8	76.7446	51.3214	65.146	64.404	364.93	506.93	545.243	472.368	7.33445	0.00180392	2.87469	2.74378							SLC7A1			RAD9A
sp|Q9NVC3|S38A7_HUMAN	SLC38A7	S38A7_HUMAN Putative sodium-coupled neutral amino acid transporter 7	2	7.63727	8.47566	8.21087	8.10793	62.029	57.3381	58.6988	59.3553	7.32065	3.47119e-06	2.87197	5.45952
sp|O15431|COPT1_HUMAN	SLC31A1	COPT1_HUMAN High affinity copper uptake protein 1	5	30.8898	35.7453	43.6786	36.7713	178.647	363.474	247.345	263.155	7.15655	0.0138377	2.83927	1.85893
sp|O43567|RNF13_HUMAN	RNF13	RNF13_HUMAN E3 ubiquitin-protein ligase RNF13	6	52.9557	48.5058	50.5186	50.66	378.778	372.847	334.435	362.02	7.14606	2.39103e-05	2.83715	4.62141										ZNF621
sp|Q9C0H2-4|TTYH3_HUMAN	TTYH3	TTYH3_HUMAN Isoform 4 of Protein tweety homolog 3	7	53.6838	53.8026	47.1664	51.5509	351.64	395.754	356.313	367.902	7.13668	2.3777e-05	2.83525	4.62384
sp|Q9NRA2|S17A5_HUMAN	SLC17A5	S17A5_HUMAN Sialin	5	45.2909	52.0891	49.4811	48.9537	331.71	365.17	351.177	349.352	7.13638	7.03252e-06	2.83519	5.15289
sp|Q16881|TRXR1_HUMAN	TXNRD1	TRXR1_HUMAN Thioredoxin reductase 1, cytoplasmic	27	269.812	267.443	233.029	256.761	1825.85	1745.88	1845.99	1805.9	7.0334	1.20214e-06	2.81422	5.92005
sp|Q6ZNA5-2|FRRS1_HUMAN	FRRS1	FRRS1_HUMAN Isoform 2 of Ferric-chelate reductase 1	2	55.3541	51.5574	46.2814	51.0643	345.666	365.491	362.412	357.856	7.00795	1.35875e-06	2.80899	5.86686							OR52N4			MYB
sp|Q9Y2T3-3|GUAD_HUMAN	GDA	GUAD_HUMAN Isoform 3 of Guanine deaminase	5	64.857	59.2901	44.5922	56.2464	379.465	417.687	373.407	390.186	6.93708	2.48874e-05	2.79433	4.60402							OR5M10			NDC1
sp|Q6P4A8|PLBL1_HUMAN	PLBD1	PLBL1_HUMAN Phospholipase B-like 1	10	103.759	123.4	120.49	115.883	785.595	779.911	838.924	801.477	6.91627	4.12304e-06	2.78999	5.38478										ZEB1
sp|Q9BT67|NFIP1_HUMAN	NDFIP1	NFIP1_HUMAN NEDD4 family-interacting protein 1	2	7.39428	11.6843	10.9214	10	70.9784	69.6068	65.7435	68.7762	6.87761	8.8058e-06	2.78191	5.05523										TAF1D
sp|Q9HCN3|TMM8A_HUMAN	TMEM8A	TMM8A_HUMAN Transmembrane protein 8A	4	21.8524	29.4764	29.4547	26.9278	177.251	190.834	181.713	183.266	6.80583	5.0168e-06	2.76677	5.29957
sp|O75509|TNR21_HUMAN	TNFRSF21	TNR21_HUMAN Tumor necrosis factor receptor superfamily member 21	1	3.28092	3.23653	5.75449	4.09064	28.3538	27.2958	27.8298	27.8265	6.80247	1.15569e-05	2.76606	4.93716
sp|Q9HB90|RRAGC_HUMAN	RRAGC	RRAGC_HUMAN Ras-related GTP-binding protein C	10	143.469	129.617	122.882	131.99	869.026	954.235	862.609	895.29	6.78304	1.44473e-05	2.76193	4.84021										ZNF766
sp|P11279|LAMP1_HUMAN	LAMP1	LAMP1_HUMAN Lysosome-associated membrane glycoprotein 1	13	167.846	171.953	165.368	168.389	1078.79	1226.58	1101.41	1135.59	6.74386	3.0244e-05	2.75358	4.51936							SLC6A20			RAD52
sp|Q86WC4|OSTM1_HUMAN	OSTM1	OSTM1_HUMAN Osteopetrosis-associated transmembrane protein 1	9	98.5604	105.253	102.27	102.028	650.42	719.693	679.686	683.266	6.69688	8.63229e-06	2.74349	5.06387										UBE2V1
sp|P30838|AL3A1_HUMAN	ALDH3A1	AL3A1_HUMAN Aldehyde dehydrogenase, dimeric NADP-preferring	1	4.72049	3.66609	5.2385	4.54169	28.0064	32.3703	30.7005	30.3591	6.68453	4.44211e-05	2.74083	4.35241		DNAJC14		GALNT4	PPT2	CMC4	CACNG4	VPS29		BMS1	CA1
sp|Q9H0W9|CK054_HUMAN	C11orf54	CK054_HUMAN Ester hydrolase C11orf54	1	10.2756	8.56287	7.39382	8.74408	54.326	62.0134	56.0228	57.4541	6.57063	3.94594e-05	2.71603	4.40385		RTN4				MRPL30	EPHB4			DONSON	HSF2BP
sp|Q96QD8|S38A2_HUMAN	SLC38A2	S38A2_HUMAN Sodium-coupled neutral amino acid transporter 2	10	114.775	131.499	118.85	121.708	748.989	847.019	791.947	795.985	6.54012	1.97672e-05	2.70932	4.70406
sp|O00754|MA2B1_HUMAN	MAN2B1	MA2B1_HUMAN Lysosomal alpha-mannosidase	28	347.94	385.373	387.806	373.707	2284.95	2406.57	2572.28	2421.27	6.47906	1.70171e-05	2.69579	4.76911							TMEM88			RPA1
sp|P02794|FRIH_HUMAN	FTH1	FRIH_HUMAN Ferritin heavy chain	16	276.133	243.64	236.155	251.976	1562.17	1565.9	1767.5	1631.86	6.47624	3.67493e-05	2.69516	4.43475							OR52R1			MYC
sp|P04075-2|ALDOA_HUMAN	ALDOA	ALDOA_HUMAN Isoform 2 of Fructose-bisphosphate aldolase A	24	316.635	216.34	206.551	246.509	1564.7	1567.65	1642	1591.45	6.45596	6.41554e-06	2.69063	5.19277		DPM3		GASK1B	RRAGD	COASY	CALCR	VPS39		BRD8	CAPSL
sp|O15455|TLR3_HUMAN	TLR3	TLR3_HUMAN Toll-like receptor 3	11	108.751	112.9	96.747	106.133	689.979	604.899	759.677	684.852	6.4528	0.000211057	2.68993	3.6756
sp|P05121|PAI1_HUMAN	SERPINE1	PAI1_HUMAN Plasminogen activator inhibitor 1	4	12.7404	20.6373	19.3209	17.5662	108.923	118.284	111.159	112.789	6.4208	1.40237e-05	2.68275	4.85314
sp|P32970|CD70_HUMAN	CD70	CD70_HUMAN CD70 antigen	6	65.5075	71.874	69.4918	68.9577	428.673	449.264	429.368	435.769	6.31936	7.94581e-07	2.65978	6.09986		UBE2J2				NDUFB9	GPR141			ETV7	NCCRP1
sp|Q8TDD5|MCLN3_HUMAN	MCOLN3	MCLN3_HUMAN Mucolipin-3	1	3.66179	4.08415	2.21552	3.32049	21.3983	21.5001	19.2829	20.7271	6.24219	4.55356e-05	2.64205	4.34165							TRAV3			SALL2
sp|P50395|GDIB_HUMAN	GDI2	GDIB_HUMAN Rab GDP dissociation inhibitor beta	14	172.686	137.948	123.301	144.645	887.693	954.992	834.231	892.306	6.16893	3.88742e-05	2.62502	4.41034							OR5P3			NEK11
sp|P40189|IL6RB_HUMAN	IL6ST	IL6RB_HUMAN Interleukin-6 receptor subunit beta	27	244.238	277.205	255.768	259.07	1534.15	1675.83	1540.87	1583.62	6.1127	9.551e-06	2.61181	5.01995							SDK2			POLR2H
sp|Q68CP4|HGNAT_HUMAN	HGSNAT	HGNAT_HUMAN Heparan-alpha-glucosaminide N-acetyltransferase	3	24.2821	33.4509	33.3274	30.3534	172.012	201.111	180.27	184.464	6.07721	7.36212e-05	2.60341	4.133							PCDHGA4			OVOL3
sp|Q12884|SEPR_HUMAN	FAP	SEPR_HUMAN Seprase	21	276.046	187.372	286.342	249.92	1544.5	1490.46	1513.84	1516.27	6.06702	3.52204e-06	2.60099	5.45321							OR4K15			METTL11B
sp|Q9BSA9|TM175_HUMAN	TMEM175	TM175_HUMAN Transmembrane protein 175	1	9.22621	10.9517	11.4181	10.532	53.6283	72.4397	65.0187	63.6956	6.0478	0.00064585	2.59641	3.18987
sp|Q9UBX1|CATF_HUMAN	CTSF	CATF_HUMAN Cathepsin F	4	54.3901	53.1678	49.4243	52.3274	288.242	345.115	307.821	313.726	5.99544	9.83998e-05	2.58387	4.00701						TRUB2	LRFN3			HIST1H2AC	SPSB1
sp|Q8WTV0-2|SCRB1_HUMAN	SCARB1	SCRB1_HUMAN Isoform 1 of Scavenger receptor class B member 1	17	207.483	244.923	238.658	230.354	1363.1	1420.05	1357.13	1380.09	5.99117	9.84431e-07	2.58284	6.00681										ZNF850
sp|Q29974|2B1G_HUMAN	HLA-DRB1	2B1G_HUMAN HLA class II histocompatibility antigen, DRB1-16 beta chain	4	60.8416	57.8428	53.0859	57.2568	341.199	363.795	323.552	342.849	5.98792	1.76597e-05	2.58205	4.75302							PIK3IP1			PAX8
sp|P12429|ANXA3_HUMAN	ANXA3	ANXA3_HUMAN Annexin A3	19	379.155	218.52	197.4	265.025	1555.66	1684.71	1519.78	1586.72	5.98705	6.47437e-05	2.58185	4.1888		ERP27		GOLGA8B	TPCN1	COX7A2L	CD22			CBX1	CDC42BPG
sp|P27105|STOM_HUMAN	STOM	STOM_HUMAN Erythrocyte band 7 integral membrane protein	42	439.23	490.662	454.773	461.555	2303.02	2958.86	2994.32	2752.07	5.96261	0.000526925	2.57594	3.27825
sp|O75955|FLOT1_HUMAN	FLOT1	FLOT1_HUMAN Flotillin-1	50	539.523	638.939	583.459	587.307	3303.89	3562.64	3598.6	3488.38	5.93961	7.49865e-06	2.57037	5.12502							OR52D1			MSH6
sp|O14763|TR10B_HUMAN	TNFRSF10B	TR10B_HUMAN Tumor necrosis factor receptor superfamily member 10B	2	10.7105	17.222	15.3475	14.4267	87.8436	81.024	85.3763	84.7479	5.8744	1.44704e-05	2.55444	4.83952
sp|Q99758|ABCA3_HUMAN	ABCA3	ABCA3_HUMAN ATP-binding cassette sub-family A member 3	2	23.9992	28.4062	27.9998	26.8017	141.472	173.259	156.12	156.95	5.85598	0.000150772	2.54991	3.82168		AGR3	ERGIC3	AP4S1	ARSB	ACAA2	ABCG5	CCDC154	ACOX2	ACTR8	ABTB1	ATG2A	ATP6V0E1	CHMP5
sp|Q6IAA8|LTOR1_HUMAN	LAMTOR1	LTOR1_HUMAN Ragulator complex protein LAMTOR1	21	266.14	253.682	284.773	268.198	1365.16	1833.32	1467.82	1555.43	5.79957	0.000828702	2.53595	3.0816							SLC6A6			RAD54L2
sp|Q9NY26|S39A1_HUMAN	SLC39A1	S39A1_HUMAN Zinc transporter ZIP1	2	11.4948	9.3971	12.3016	11.0645	61.936	70.863	59.6463	64.1484	5.79767	0.000113889	2.53547	3.94352
sp|P21281|VATB2_HUMAN	ATP6V1B2	VATB2_HUMAN V-type proton ATPase subunit B, brain isoform	26	261.932	240.792	240.542	247.755	1394.69	1481.61	1417.02	1431.1	5.77628	1.62287e-06	2.53014	5.78972		OSBPL5		SYS1		HSD17B8	CLRN1			CSTF2T	FARSA
sp|P15586|GNS_HUMAN	GNS	GNS_HUMAN N-acetylglucosamine-6-sulfatase	35	508.888	574.08	543.115	542.028	2982.66	3223.38	3177.12	3127.72	5.77041	4.47973e-06	2.52867	5.34875							OR8G2P			NOB1
sp|Q96B67|ARRD3_HUMAN	ARRDC3	ARRD3_HUMAN Arrestin domain-containing protein 3	5	42.6905	45.0128	48.1471	45.2834	264.114	261.675	257.537	261.109	5.76609	1.05677e-07	2.52759	6.97602		JSRP1		RHBDD2		FDX1	CHRNA1			CHAF1A	DPYSL4
sp|P51798|CLCN7_HUMAN	CLCN7	CLCN7_HUMAN H(+)/Cl(-) exchange transporter 7	11	152.953	148.129	146.556	149.213	856.826	851.713	864.378	857.639	5.74776	7.07555e-09	2.523	8.15024						PTCD2	HCAR2			FOXP1	PGLS
sp|Q9NUM4|T106B_HUMAN	TMEM106B	T106B_HUMAN Transmembrane protein 106B	11	149.989	168.932	169.393	162.771	884.007	936.523	977.24	932.59	5.72945	1.00183e-05	2.5184	4.9992
sp|P15260|INGR1_HUMAN	IFNGR1	INGR1_HUMAN Interferon gamma receptor 1	6	72.3647	76.2722	74.199	74.2786	407.999	430.206	428.648	422.284	5.68514	1.12396e-06	2.5072	5.94925							SCARB1			POLL
sp|A6NCE7|MP3B2_HUMAN	MAP1LC3B2	MP3B2_HUMAN Microtubule-associated proteins 1A/1B light chain 3 beta 2	4	55.5227	53.186	64.2406	57.6498	294.399	386.905	289.315	323.54	5.61216	0.0011315	2.48856	2.94634							TNFRSF10C			RPP14
sp|P04179|SODM_HUMAN	SOD2	SODM_HUMAN Superoxide dismutase [Mn], mitochondrial	20	313.295	424.96	397.426	378.56	1935.2	2238.41	2197.43	2123.68	5.60989	6.51813e-05	2.48797	4.18588
sp|Q9Y2E5|MA2B2_HUMAN	MAN2B2	MA2B2_HUMAN Epididymis-specific alpha-mannosidase	12	114.146	132.942	120.453	122.514	627.844	702.287	687.431	672.521	5.48935	1.94464e-05	2.45664	4.71116							TMIGD2			RPA2
sp|P0C0L4|CO4A_HUMAN	C4A	CO4A_HUMAN Complement C4-A	7	197.619	176.482	171.166	181.756	953.125	1042.51	995.372	997.002	5.4854	7.22004e-06	2.4556	5.14146		SERPINA2				MRPL9	FCGR1A			DUX4L9	ITPA
sp|Q16719|KYNU_HUMAN	KYNU	KYNU_HUMAN Kynureninase	11	210.084	191.209	164.754	188.682	1035.27	1064.11	1000.71	1033.36	5.47674	3.03512e-06	2.45332	5.51782							SLC52A1			PYHIN1
sp|Q9H3Z4|DNJC5_HUMAN	DNAJC5	DNJC5_HUMAN DnaJ homolog subfamily C member 5	10	192.28	210.558	212.079	204.972	1005.48	1213.77	1139.93	1119.73	5.46283	0.000117472	2.44965	3.93007							NTSR1			IPMK
sp|P42785|PCP_HUMAN	PRCP	PCP_HUMAN Lysosomal Pro-X carboxypeptidase	17	272.551	316.291	309.061	299.301	1569.33	1695.7	1638.81	1634.62	5.46144	4.32626e-06	2.44928	5.36389										ZNF20
sp|P58335|ANTR2_HUMAN	ANTXR2	ANTR2_HUMAN Anthrax toxin receptor 2	3	38.5624	34.1627	29.9846	34.2366	175.353	168.717	210.358	184.809	5.39801	0.000332218	2.43243	3.47858		ERN1		GOLGA5	TMEM175	COX6B2	CD180			CARF	CCT8L2
sp|Q8N697|S15A4_HUMAN	SLC15A4	S15A4_HUMAN Solute carrier family 15 member 4	8	153.848	160.607	162.464	158.973	840.853	886.515	840.905	856.091	5.38513	1.4375e-06	2.42898	5.84239
sp|O95166|GBRAP_HUMAN	GABARAP	GBRAP_HUMAN Gamma-aminobutyric acid receptor-associated protein	1	67.8406	57.5565	69.9447	65.1139	343.145	378.621	327.51	349.759	5.37149	5.30299e-05	2.42532	4.27548							OR5AS1			NAB1
sp|O14786|NRP1_HUMAN	NRP1	NRP1_HUMAN Neuropilin-1	3	20.4287	28.9558	22.7575	24.0473	126.735	132.857	126.952	128.848	5.3581	5.44581e-06	2.42172	5.26394										TIPARP
sp|Q8NC42|RN149_HUMAN	RNF149	RN149_HUMAN E3 ubiquitin-protein ligase RNF149	6	55.6488	64.8685	56.7739	59.0971	338.185	281.583	329.16	316.31	5.35237	0.000133214	2.42018	3.87545										ZNF623
sp|P11117|PPAL_HUMAN	ACP2	PPAL_HUMAN Lysosomal acid phosphatase	22	211.728	251.698	215.786	226.404	1180.73	1160	1286.87	1209.2	5.34089	1.84854e-05	2.41708	4.73317		COLGALT1		CHST2	CYB561A3	ARMCX2	ANO2	RAB27A	ZADH2	ARNT2	AOX1	TEX264	RRAGD
sp|Q6P9B6|TLDC1_HUMAN	TLDC1	TLDC1_HUMAN TLD domain-containing protein 1	3	49.9665	56.5241	51.4482	52.6462	262.405	287.147	284.276	277.943	5.27944	9.75047e-06	2.40038	5.01097
sp|Q6PCB8|EMB_HUMAN	EMB	EMB_HUMAN Embigin	1	17.2323	14.9512	14.9463	15.7099	80.8727	84.0866	81.5204	82.1599	5.2298	7.30368e-07	2.38676	6.13646							OR2A2			LMNB1
sp|P23458|JAK1_HUMAN	JAK1	JAK1_HUMAN Tyrosine-protein kinase JAK1	3	36.8319	48.8209	36.5975	40.7501	197.907	232.245	206.532	212.228	5.20803	0.000101562	2.38074	3.99327							SLC22A6			PRDM5
sp|Q9Y646|CBPQ_HUMAN	CPQ	CBPQ_HUMAN Carboxypeptidase Q	1	16.6054	18.1307	14.5651	16.4337	82.3046	84.4617	87.566	84.7774	5.15875	3.16129e-06	2.36702	5.50013						TARS2	KIR2DL5A			H2BC1	SARG
sp|P15328|FOLR1_HUMAN	FOLR1	FOLR1_HUMAN Folate receptor alpha	12	157.444	158.219	157.702	157.788	795.313	810.125	830.998	812.145	5.14707	3.75405e-07	2.36375	6.4255							OR52K1			MTREX
sp|Q14849-3|STAR3_HUMAN	STARD3	STAR3_HUMAN Isoform 3 of StAR-related lipid transfer protein 3	3	17.0228	23.395	21.7274	20.7151	103.737	103.715	109.711	105.721	5.10359	6.62397e-06	2.35151	5.17888
sp|P61970|NTF2_HUMAN	NUTF2	NTF2_HUMAN Nuclear transport factor 2	2	26.557	19.5841	21.5655	22.5689	85.0142	133.629	125.694	114.779	5.08572	0.00372865	2.34645	2.42845										TSEN15
sp|P61916|NPC2_HUMAN	NPC2	NPC2_HUMAN Epididymal secretory protein E1	8	108.722	134.433	108.418	117.191	614.921	596.585	575.421	595.642	5.08265	4.7632e-06	2.34558	5.3221										TICRR
sp|Q9BXP2|S12A9_HUMAN	SLC12A9	S12A9_HUMAN Solute carrier family 12 member 9	3	38.5322	38.7044	35.7634	37.6667	183.905	203.44	185.906	191.084	5.07302	1.66371e-05	2.34284	4.77892
sp|P46926|GNPI1_HUMAN	GNPDA1	GNPI1_HUMAN Glucosamine-6-phosphate isomerase 1	1	5.60277	7.05277	6.79315	6.48289	32.5169	36.9582	29.0113	32.8288	5.06391	0.000355892	2.34025	3.44868							OR8D2			NLE1
sp|O00462|MANBA_HUMAN	MANBA	MANBA_HUMAN Beta-mannosidase	39	616.819	687.545	594.166	632.843	3091.98	3228.61	3201.44	3174.01	5.01548	9.21988e-07	2.32639	6.03527							TMPRSS11B			RPA3
sp|P20036|DPA1_HUMAN	HLA-DPA1	DPA1_HUMAN HLA class II histocompatibility antigen, DP alpha 1 chain	3	54.7986	60.4252	54.2778	56.5005	278.533	277.705	292.884	283.041	5.00952	1.7988e-06	2.32467	5.74502							PECAM1			PAX5
sp|Q9NQ11|AT132_HUMAN	ATP13A2	AT132_HUMAN Probable cation-transporting ATPase 13A2	19	152.356	172.674	168.565	164.532	781.945	825.074	850.853	819.291	4.97953	6.34944e-06	2.31601	5.19726		MARCH6		SLC35C1		GHITM	CLDN11			CLK2	EIF2AK4
sp|Q5SYB0|FRPD1_HUMAN	FRMPD1	FRPD1_HUMAN FERM and PDZ domain-containing protein 1	1	35.5866	36.8059	39.7609	37.3845	175.308	198.449	179.958	184.572	4.93713	3.33515e-05	2.30367	4.47688							OR52N2			MXI1
sp|Q13510-2|ASAH1_HUMAN	ASAH1	ASAH1_HUMAN Isoform 2 of Acid ceramidase	38	572.695	614.313	585.997	591.002	2772.24	3027.39	2942.15	2913.93	4.93049	6.82283e-06	2.30173	5.16604		KDELR3		RNF24		FMC1	CHRNA4			CHD6	DTX3
sp|P20933|ASPG_HUMAN	AGA	ASPG_HUMAN N(4)-(beta-N-acetylglucosaminyl)-L-asparaginase	6	95.519	89.6372	96.898	94.0181	460.051	389.782	539.81	463.215	4.92687	0.00104693	2.30067	2.98008		CYP3A7		DOP1A	LAMP1	BCKDHB	ATP2B1	SLC9A6		ATXN1L	ASS1
sp|Q9NY64|GTR8_HUMAN	SLC2A8	GTR8_HUMAN Solute carrier family 2, facilitated glucose transporter member 8	2	9.39707	9.91774	6.54372	8.61951	37.8193	48.6823	40.8458	42.4491	4.92477	0.000574594	2.30006	3.24064
sp|Q9Y5K8|VATD_HUMAN	ATP6V1D	VATD_HUMAN V-type proton ATPase subunit D	7	102.218	95.761	118.69	105.556	503.238	590.672	464.582	519.498	4.92151	0.00039972	2.2991	3.39824		OSTC		TBC1D14		HSPD1	CMKLR1			CTBP2	FASN
sp|Q9BQD3|KXDL1_HUMAN	KXD1	KXDL1_HUMAN KxDL motif-containing protein 1	3	41.5574	40.96	44.3048	42.274	200.65	220.514	202.201	207.788	4.91526	1.37919e-05	2.29727	4.86038							SLC51B			PYGO2
sp|Q96GS4|CQ059_HUMAN	C17orf59	CQ059_HUMAN Uncharacterized protein C17orf59	10	126.842	130.803	119.677	125.774	630.2	609.513	610.5	616.738	4.90353	3.23245e-07	2.29382	6.49047		SEC22A				MRPL41	ERVK-9			DSCC1	HYKK
sp|P26639-2|SYTC_HUMAN	TARS	SYTC_HUMAN Isoform 2 of Threonine--tRNA ligase, cytoplasmic	27	624.369	414.741	426.913	488.674	2248.25	2487.34	2439.95	2391.84	4.89456	4.45303e-05	2.29118	4.35134
sp|P38606|VATA_HUMAN	ATP6V1A	VATA_HUMAN V-type proton ATPase catalytic subunit A	64	1113.33	995.003	1024.84	1044.39	4834.44	5128.98	5110.97	5024.8	4.81122	2.54868e-06	2.2664	5.59368		OS9		SYNDIG1L		HSD17B10	CLMP			CSTF2	FAM83A
sp|Q969W9|PMEPA_HUMAN	PMEPA1	PMEPA_HUMAN Transmembrane prostate androgen-induced protein	2	9.82841	9.67203	7.88816	9.12953	43.7186	44.5556	43.3961	43.8901	4.80749	1.05213e-06	2.26528	5.97793										ZFP92
sp|Q96CS7-2|PKHB2_HUMAN	PLEKHB2	PKHB2_HUMAN Isoform 2 of Pleckstrin homology domain-containing family B member 2	2	50.6704	38.6944	38.3045	42.5564	201.853	209.444	199.811	203.703	4.78665	5.55176e-06	2.25902	5.25557										ZFP28
sp|Q86VP1|TAXB1_HUMAN	TAX1BP1	TAXB1_HUMAN Tax1-binding protein 1	7	78.1219	76.1922	83.3629	79.2257	346.198	412.979	378.15	379.109	4.78518	0.000102272	2.25857	3.99024
sp|Q99519|NEUR1_HUMAN	NEU1	NEUR1_HUMAN Sialidase-1	12	173.362	167.118	170.658	170.379	797.047	778.507	851.894	809.149	4.74911	8.5385e-06	2.24766	5.06862										TCF21
sp|P04233-2|HG2A_HUMAN	CD74	HG2A_HUMAN Isoform 2 of HLA class II histocompatibility antigen gamma chain	6	100.203	124.098	85.5525	103.285	488.121	472.601	510.06	490.261	4.7467	1.57916e-05	2.24692	4.80157		UBXN8				NDUFC1	GPR142			EVX1	NCF1B
sp|O43854|EDIL3_HUMAN	EDIL3	EDIL3_HUMAN EGF-like repeat and discoidin I-like domain-containing protein 3	18	244.342	201.815	187.652	211.269	963.014	1016.92	991.25	990.395	4.68783	4.58997e-06	2.22892	5.33819							OR11L1			KLF14
sp|P53801|PTTG_HUMAN	PTTG1IP	PTTG_HUMAN Pituitary tumor-transforming gene 1 protein-interacting protein	1	12.1049	10.5218	8.9109	10.5125	46.8356	51.4974	49.0826	49.1385	4.67429	1.88747e-05	2.22475	4.72412										ZNF407
sp|Q8NE00|TM104_HUMAN	TMEM104	TM104_HUMAN Transmembrane protein 104	1	6.10761	7.35569	6.688	6.7171	34.9272	29.5316	29.0993	31.186	4.64278	0.000213594	2.21499	3.67041
sp|Q6J4K2|NCKX6_HUMAN	SLC8B1	NCKX6_HUMAN Sodium/potassium/calcium exchanger 6, mitochondrial	1	12.9292	9.07711	10.2794	10.7619	49.2452	52.2948	48.1578	49.8993	4.63667	2.0201e-05	2.21309	4.69463
sp|P00492|HPRT_HUMAN	HPRT1	HPRT_HUMAN Hypoxanthine-guanine phosphoribosyltransferase	4	76.3356	59.0629	62.4499	65.9495	262.389	346.764	306.214	305.123	4.62661	0.000659707	2.20996	3.18065							PTGDR2			PHF5A
sp|P00491|PNPH_HUMAN	PNP	PNPH_HUMAN Purine nucleoside phosphorylase	2	94.6365	47.4442	75.4014	72.494	319.886	368.911	313.835	334.211	4.61018	0.000295031	2.20482	3.53013										ZHX2
sp|Q14254|FLOT2_HUMAN	FLOT2	FLOT2_HUMAN Flotillin-2	42	777.207	870.105	824.785	824.033	3548.73	4197.57	3640.43	3795.58	4.6061	0.000130434	2.20355	3.88461							OR52E1			MSL1
sp|Q99538|LGMN_HUMAN	LGMN	LGMN_HUMAN Legumain	7	96.7787	104.147	90.8055	97.2436	429.333	491.543	421.435	447.437	4.6012	9.95559e-05	2.20201	4.00193							SPRN			RBM5
sp|P07602-3|SAP_HUMAN	PSAP	SAP_HUMAN Isoform Sap-mu-9 of Prosaposin	27	538.905	702.252	651.059	630.739	3139.76	3002.81	2547.97	2896.85	4.59278	0.00025643	2.19937	3.59103										ZNF263
sp|P56817|BACE1_HUMAN	BACE1	BACE1_HUMAN Beta-secretase 1	1	9.61615	12.5732	9.07934	10.4229	46.9207	50.8746	45.5323	47.7759	4.58374	4.23772e-05	2.19653	4.37287		PIGO		TRAPPC3L		LIPT2	CSPG4			DCAF6	GGPS1
sp|P36543|VATE1_HUMAN	ATP6V1E1	VATE1_HUMAN V-type proton ATPase subunit E 1	17	351.978	313.531	332.539	332.683	1436.13	1828.34	1305.58	1523.35	4.57898	0.0016399	2.19503	2.78518		P3H3		TBC1D23		HSPE1	CNGA1			CTC1	FBXL14
sp|Q8NHS3|MFSD8_HUMAN	MFSD8	MFSD8_HUMAN Major facilitator superfamily domain-containing protein 8	2	21.5094	21.2318	18.2573	20.3328	93.8937	91.4252	93.1145	92.8111	4.5646	5.65377e-07	2.19049	6.24766							TRBJ1-3			SDE2
sp|P07686|HEXB_HUMAN	HEXB	HEXB_HUMAN Beta-hexosaminidase subunit beta	40	840.946	870.858	792.524	834.776	3482.63	4099.24	3831.56	3804.48	4.55748	7.89776e-05	2.18824	4.1025							PCDHGA12			OTX2
sp|P10155|RO60_HUMAN	TROVE2	RO60_HUMAN 60 kDa SS-A/Ro ribonucleoprotein	2	21.3136	18.1304	19.4999	19.648	81.1088	101.173	83.5595	88.6139	4.51008	0.000417065	2.17315	3.3798
sp|Q93050|VPP1_HUMAN	ATP6V0A1	VPP1_HUMAN V-type proton ATPase 116 kDa subunit a isoform 1	33	550.973	586.982	518.391	552.115	2287.11	2685.4	2493.78	2488.76	4.50769	7.72275e-05	2.17239	4.11223		ORMDL1		STX11		HMGCS2	CLEC4G			CSRP1	FABP9
sp|Q8NBW4|S38A9_HUMAN	SLC38A9	S38A9_HUMAN Putative sodium-coupled neutral amino acid transporter 9	4	75.3289	89.6822	75.8315	80.2809	335.441	380.948	364.699	360.363	4.48877	3.81138e-05	2.16632	4.41892
sp|Q04828|AK1C1_HUMAN	AKR1C1	AK1C1_HUMAN Aldo-keto reductase family 1 member C1	4	46.1742	28.6661	30.8328	35.2243	148.275	166.215	158.2	157.563	4.47314	8.57013e-05	2.16129	4.06701		DHRS7B		GALNT12	NPC2	CISD3	C2orf88	TMEM163		BEND3	BOLL
sp|Q9NQW7-3|XPP1_HUMAN	XPNPEP1	XPP1_HUMAN Isoform 3 of Xaa-Pro aminopeptidase 1	5	51.7658	49.4219	41.359	47.5156	218.284	197.808	218.607	211.566	4.45257	2.67838e-05	2.15464	4.57213
sp|Q9HB40|RISC_HUMAN	SCPEP1	RISC_HUMAN Retinoid-inducible serine carboxypeptidase	24	459.228	431.531	466.703	452.487	1863.79	1950	2139.69	1984.49	4.38574	4.87703e-05	2.13282	4.31184										ZNF879
sp|Q9NU53|GINM1_HUMAN	GINM1	GINM1_HUMAN Glycoprotein integral membrane protein 1	2	26.6732	28.1857	25.2568	26.7052	117.657	112.837	119.363	116.619	4.3669	1.88021e-06	2.12661	5.72579							OR6C70			NFIA
sp|O60282-2|KIF5C_HUMAN	KIF5C	KIF5C_HUMAN Isoform 2 of Kinesin heavy chain isoform 5C	1	19.5409	18.3724	14.0577	17.3237	74.4984	75.0674	73.1942	74.2534	4.28624	5.41204e-06	2.09971	5.26664							SLC39A6			PTBP1
sp|Q8NBI2-2|CYAC3_HUMAN	CYB561A3	CYAC3_HUMAN Isoform 2 of Cytochrome b ascorbate-dependent protein 3	3	49.6632	56.2884	44.4743	50.142	228.093	210.399	205.94	214.811	4.28405	2.65576e-05	2.09897	4.57581						UQCC3	LSAMP			HIST2H3A	STXBP4
sp|P06280|AGAL_HUMAN	GLA	AGAL_HUMAN Alpha-galactosidase A	14	471.532	543.031	494.533	503.032	1976.99	2248.24	2237.27	2154.17	4.28237	5.45243e-05	2.09841	4.26341							OR6K3			NFKBIZ
sp|Q8N357|S35F6_HUMAN	SLC35F6	S35F6_HUMAN Solute carrier family 35 member F6	3	49.1052	48.5001	39.3183	45.6412	184.493	213.988	185.758	194.746	4.2669	0.000124236	2.09319	3.90575
sp|P13284|GILT_HUMAN	IFI30	GILT_HUMAN Gamma-interferon-inducible lysosomal thiol reductase	5	108.609	127.931	125.02	120.52	480.62	551.246	510.581	514.149	4.26608	5.07488e-05	2.09291	4.29457							S1PR5			POLI
sp|P50897|PPT1_HUMAN	PPT1	PPT1_HUMAN Palmitoyl-protein thioesterase 1	16	290.64	299.226	303.601	297.822	1176.49	1342.84	1291.04	1270.12	4.2647	3.89675e-05	2.09244	4.4093										ZNF184
sp|Q9H6B4|CLMP_HUMAN	CLMP	CLMP_HUMAN CXADR-like membrane protein	1	11.9871	14.3009	12.4322	12.9067	51.0577	58.7739	54.354	54.7285	4.24032	5.80859e-05	2.08417	4.23593						RDH13	HJV			FRG2C	PITHD1
sp|Q96DM3|MIC1_HUMAN	C18orf8	MIC1_HUMAN Uncharacterized protein C18orf8	7	110.582	115.366	122.143	116.03	491.155	503.786	479.37	491.437	4.23542	1.11883e-06	2.08251	5.95124		SEC61A2				MRPL45	ERVW-1			DUSP2	IFI44L
sp|P06744|G6PI_HUMAN	GPI	G6PI_HUMAN Glucose-6-phosphate isomerase	14	272.029	231.066	187.882	230.326	906.871	976.23	1042.28	975.127	4.23369	8.53207e-05	2.08191	4.06895							ORAI1			NPAS3
sp|Q8TCT8|SPP2A_HUMAN	SPPL2A	SPP2A_HUMAN Signal peptide peptidase-like 2A	4	105.486	96.2986	93.9826	98.5892	437.374	345.518	458.575	413.822	4.19744	0.000829827	2.06951	3.08101
sp|P08473|NEP_HUMAN	MME	NEP_HUMAN Neprilysin	5	76.7949	65.3348	64.4888	68.8728	291.022	273.568	301.714	288.768	4.19277	1.74939e-05	2.0679	4.75711							TRBV19			SFMBT2
sp|Q13137-4|CACO2_HUMAN	CALCOCO2	CACO2_HUMAN Isoform 4 of Calcium-binding and coiled-coil domain-containing protein 2	5	88.8543	83.5733	79.463	83.9635	331.25	375.781	349.006	352.012	4.19244	3.49814e-05	2.06779	4.45616		SOAT2				MRPS31	FREM2			EBF4	KRT7
sp|Q86WA9|S2611_HUMAN	SLC26A11	S2611_HUMAN Sodium-independent sulfate anion transporter	1	8.26119	4.21981	7.49716	6.65939	27.4217	27.3371	28.7127	27.8239	4.17814	8.77023e-05	2.06286	4.05699
sp|O95832|CLD1_HUMAN	CLDN1	CLD1_HUMAN Claudin-1	2	15.9107	13.2129	21.969	17.0309	52.2434	70.2417	90.5051	70.9968	4.16871	0.0089423	2.0596	2.04855						PTCD3	HCAR3			FOXP2	PGM1
sp|Q8NHX9|TPC2_HUMAN	TPCN2	TPC2_HUMAN Two pore calcium channel protein 2	2	9.56973	11.864	17.3667	12.9335	66.7337	40.3618	54.5921	53.8959	4.16716	0.00677601	2.05906	2.16903
tr|H3BT12|H3BT12_HUMAN	FEM1B	H3BT12_HUMAN Protein fem-1 homolog B (Fragment)	1	18.5291	23.4039	21.1264	21.0198	86.8854	90.6504	85.0538	87.5299	4.16416	6.71758e-06	2.05803	5.17279							OR51B6			MLLT6
sp|P17405|ASM_HUMAN	SMPD1	ASM_HUMAN Sphingomyelin phosphodiesterase	11	143.009	158.926	136.325	146.087	573.693	558.808	680.742	604.415	4.13737	0.0002995	2.04871	3.5236
sp|Q13126-2|MTAP_HUMAN	MTAP	MTAP_HUMAN Isoform 2 of S-methyl-5'-thioadenosine phosphorylase	2	14.1588	15.6048	13.951	14.5715	66.9663	50.8666	62.8286	60.2205	4.13274	0.000713073	2.0471	3.14687										SPIN1
sp|P06865|HEXA_HUMAN	HEXA	HEXA_HUMAN Beta-hexosaminidase subunit alpha	43	778.783	818.987	778.811	792.194	3158.25	3293.75	3366.37	3272.79	4.1313	2.39862e-06	2.0466	5.62004							PCDHGA11			OTX1
sp|P21283|VATC1_HUMAN	ATP6V1C1	VATC1_HUMAN V-type proton ATPase subunit C 1	25	698.153	601.903	674.681	658.246	2751.95	2949.67	2434.78	2712.13	4.12024	0.000176923	2.04273	3.75222		OST4		TANGO2		HSDL1	CLTRN			CSTF3	FARSB
sp|P17174|AATC_HUMAN	GOT1	AATC_HUMAN Aspartate aminotransferase, cytoplasmic	9	78.053	72.4337	80.6277	77.0381	310.642	327.862	313.56	317.354	4.11944	2.09139e-06	2.04245	5.67957							OR9A2			NOP16
sp|Q9HB07|MYG1_HUMAN	C12orf10	MYG1_HUMAN UPF0160 protein MYG1, mitochondrial	1	30.4121	31.6368	30.9465	30.9985	121.318	133.79	126.961	127.356	4.10848	1.18816e-05	2.0386	4.92512		SACM1L				MRPL33	ERVFRD-1			DPF3	HSP90AA4P
sp|P10619|PPGB_HUMAN	CTSA	PPGB_HUMAN Lysosomal protective protein	12	420.986	433.743	445.619	433.449	1866.54	1698.15	1770.96	1778.55	4.10324	1.07082e-05	2.03677	4.97028						TRMT10C	LPAR5			HIRA	SPRR2E
sp|Q13641|TPBG_HUMAN	TPBG	TPBG_HUMAN Trophoblast glycoprotein	6	130.213	131.537	123.282	128.344	564.086	438.173	572.566	524.942	4.09012	0.000804934	2.03214	3.09424
sp|P22304|IDS_HUMAN	IDS	IDS_HUMAN Iduronate 2-sulfatase	4	58.8417	64.4863	59.0503	60.7928	242.502	253.295	250.025	248.607	4.08942	8.9261e-07	2.0319	6.04934							S1PR2			POLE3
sp|P52209|6PGD_HUMAN	PGD	6PGD_HUMAN 6-phosphogluconate dehydrogenase, decarboxylating	8	148.07	106.735	98.9882	117.931	496.069	449.427	500.089	481.862	4.08596	8.22307e-05	2.03068	4.08497										ZBTB21
sp|Q9Y617|SERC_HUMAN	PSAT1	SERC_HUMAN Phosphoserine aminotransferase	8	174.473	141.161	134.564	150.066	581.282	654.08	601.668	612.343	4.08049	4.99645e-05	2.02874	4.30134										ZNF264
sp|P29144|TPP2_HUMAN	TPP2	TPP2_HUMAN Tripeptidyl-peptidase 2	1	15.5707	13.4768	12.6435	13.897	57.8961	56.5303	55.5034	56.6433	4.07594	2.74382e-06	2.02713	5.56165
sp|Q9BQS8|FYCO1_HUMAN	FYCO1	FYCO1_HUMAN FYVE and coiled-coil domain-containing protein 1	3	21.3114	20.2359	17.7971	19.7815	80.9693	80.5271	79.6008	80.3657	4.06268	6.86963e-07	2.02243	6.16307							OR5AC2			MYPOP
sp|Q96BI3|APH1A_HUMAN	APH1A	APH1A_HUMAN Gamma-secretase subunit APH-1A	2	29.8698	29.2016	27.0571	28.7095	110.743	110.357	127.346	116.149	4.04565	0.000102711	2.01637	3.98838		FLT3		HS2ST1		CYP11A1	CD5			CCNC	CNBD2
sp|Q9UKK9|NUDT5_HUMAN	NUDT5	NUDT5_HUMAN ADP-sugar pyrophosphatase	7	101.867	64.8296	77.6027	81.4331	292.111	363.912	332.058	329.36	4.04455	0.000452061	2.01598	3.3448										TOR1AIP1
sp|O95164|UBL3_HUMAN	UBL3	UBL3_HUMAN Ubiquitin-like protein 3	1	39.9748	27.8569	35.9499	34.5939	127.455	146.363	144.709	139.509	4.03277	0.000116621	2.01177	3.93322
sp|Q96A54|ADR1_HUMAN	ADIPOR1	ADR1_HUMAN Adiponectin receptor protein 1	1	9.88165	12.449	11.0075	11.1127	42.8941	45.4812	45.5889	44.6547	4.01834	8.29437e-06	2.0066	5.08122		CYP2U1		CSGALNACT2	IFI30	ATPSCKMT	ATP1A3	SGK3		ATOH7	ASAP3
sp|Q7L1V2|MON1B_HUMAN	MON1B	MON1B_HUMAN Vacuolar fusion protein MON1 homolog B	4	51.99	53.1704	64.5957	56.5854	227.07	225.064	224.513	225.549	3.98599	2.06012e-06	1.99494	5.68611							TRBV3-1			SHOX
sp|P34059|GALNS_HUMAN	GALNS	GALNS_HUMAN N-acetylgalactosamine-6-sulfatase	17	341.797	328.424	316.722	328.981	1236.22	1382.41	1301.36	1306.66	3.97184	2.19624e-05	1.98981	4.65832							OR5B21			NAIF1
sp|Q9UM22|EPDR1_HUMAN	EPDR1	EPDR1_HUMAN Mammalian ependymin-related protein 1	3	66.1746	81.1599	69.596	72.3102	270.469	299.621	288.52	286.203	3.958	2.43145e-05	1.98477	4.61414							OR2D2			LUC7L3
sp|Q9HD67|MYO10_HUMAN	MYO10	MYO10_HUMAN Unconventional myosin-X	2	50.7371	53.8803	54.9513	53.1896	133.843	414.018	81.8017	209.888	3.94603	0.203433	1.9804	0.691579										STK19
sp|Q9H0R8-2|GBRL1_HUMAN	GABARAPL1	GBRL1_HUMAN Isoform 2 of Gamma-aminobutyric acid receptor-associated protein-like 1	3	78.1888	62.3093	71.7478	70.7486	269.494	295.761	265.677	276.977	3.91495	3.99422e-05	1.96899	4.39857							OR5AU1			NAB2
sp|Q9BXS4|TMM59_HUMAN	TMEM59	TMM59_HUMAN Transmembrane protein 59	11	146.722	149.611	156.69	151.008	567.353	618.454	585.817	590.541	3.91067	8.58136e-06	1.96741	5.06644
sp|Q9UI12|VATH_HUMAN	ATP6V1H	VATH_HUMAN V-type proton ATPase subunit H	18	253.108	515.668	221.785	330.187	1250.17	1361.59	1249.87	1287.21	3.89842	0.000674514	1.96289	3.17101		P4HA2		TMED1		IBA57	CNNM2			CTDSP2	FBXO10
sp|P11766|ADHX_HUMAN	ADH5	ADHX_HUMAN Alcohol dehydrogenase class-3	1	28.4902	16.244	15.3462	20.0268	74.3558	78.3918	80.8658	77.8711	3.88835	0.000239067	1.95916	3.62148		CYP2S1		CSGALNACT1	IDUA	ATPAF2	ATP1A2	SCAMP5		ATOH1	AS3MT
sp|Q9NRY6|PLS3_HUMAN	PLSCR3	PLS3_HUMAN Phospholipid scramblase 3	3	46.9397	50.0579	45.7228	47.5735	177.62	193.291	183.77	184.894	3.88649	8.43452e-06	1.95847	5.07394										ZFP69B
sp|Q8N122|RPTOR_HUMAN	RPTOR	RPTOR_HUMAN Regulatory-associated protein of mTOR	10	222.129	223.338	212.862	219.443	838.77	852.946	829.002	840.24	3.82896	1.41744e-07	1.93695	6.8485										ZNF761
sp|P07858|CATB_HUMAN	CTSB	CATB_HUMAN Cathepsin B	14	224.325	213.042	211.862	216.41	803.848	840.284	837.664	827.265	3.82268	1.01187e-06	1.93459	5.99488						TRMT61B	LPAR6			HIRIP3	SPRR2F
sp|P31150|GDIA_HUMAN	GDI1	GDIA_HUMAN Rab GDP dissociation inhibitor alpha	9	130.507	95.8513	96.1038	107.487	406.981	436.933	378.805	407.573	3.79182	0.000123108	1.92289	3.90972							OR5P2			NEIL3
sp|O95772|MENTO_HUMAN	STARD3NL	MENTO_HUMAN MLN64 N-terminal domain homolog	3	42.2773	37.0802	34.2971	37.8848	132.943	152.384	145.501	143.609	3.79068	6.73116e-05	1.92246	4.17191
sp|Q0VGL1|LTOR4_HUMAN	LAMTOR4	LTOR4_HUMAN Ragulator complex protein LAMTOR4	2	41.431	25.7097	32.6531	33.2646	98.8421	140.865	137.803	125.837	3.78291	0.00291167	1.91949	2.53586							SLC7A3			RAG2
sp|Q4G0F5|VP26B_HUMAN	VPS26B	VP26B_HUMAN Vacuolar protein sorting-associated protein 26B	2	64.6877	48.4681	47.0767	53.4108	195.147	220.804	186.377	200.776	3.75909	0.000234498	1.91038	3.62986
sp|Q9UNK0|STX8_HUMAN	STX8	STX8_HUMAN Syntaxin-8	8	137.837	132.721	150.47	140.343	483.186	600.787	498.547	527.507	3.75871	0.00048552	1.91024	3.31379
sp|P29317|EPHA2_HUMAN	EPHA2	EPHA2_HUMAN Ephrin type-A receptor 2	22	462.032	577.265	500.759	513.352	1977.81	1858.67	1939.86	1925.45	3.75073	8.48633e-06	1.90717	5.07128							OR2D3			LUZP1
sp|Q5VST6|AB17B_HUMAN	ABHD17B	AB17B_HUMAN Alpha/beta hydrolase domain-containing protein 17B	6	110.108	96.635	101.198	102.647	371.432	407.822	369.53	382.928	3.73053	2.7984e-05	1.89938	4.55309		ATP2A1	TMED2	B3GNT6	ATP6V1F	ACSM4	ADGRL1	FIG4	LONP2	ALKBH5	AFTPH	FUNDC1	FLCN	VTA1
sp|O75558|STX11_HUMAN	STX11	STX11_HUMAN Syntaxin-11	1	8.38494	10.0936	11.7654	10.0813	39.6134	37.6738	35.0911	37.4594	3.71573	7.4249e-05	1.89365	4.12931
sp|Q9UEU0|VTI1B_HUMAN	VTI1B	VTI1B_HUMAN Vesicle transport through interaction with t-SNAREs homolog 1B	10	141.27	131.371	146.043	139.561	470.002	566.802	516.476	517.76	3.70991	0.000180867	1.89138	3.74264
sp|Q567U6|CCD93_HUMAN	CCDC93	CCD93_HUMAN Coiled-coil domain-containing protein 93	11	170.038	158.389	149.216	159.214	541	620.771	604.366	588.712	3.69761	6.79541e-05	1.88659	4.16778		TMEM38B				NDUFA3	GLP1R			ERCC8	MYO5B
sp|P17900|SAP3_HUMAN	GM2A	SAP3_HUMAN Ganglioside GM2 activator	9	192.137	212.558	213.829	206.175	770.042	735.871	772.874	759.596	3.68423	2.31851e-06	1.88136	5.63479							OR7A2P			NKAP
sp|Q92542|NICA_HUMAN	NCSTN	NICA_HUMAN Nicastrin	26	631.473	730.34	657.384	673.066	2439.67	2549.1	2440.44	2476.4	3.67929	2.72702e-06	1.87943	5.56431										TAF13
sp|Q13488|VPP3_HUMAN	TCIRG1	VPP3_HUMAN V-type proton ATPase 116 kDa subunit a isoform 3	33	548.507	527.731	553.089	543.109	1991.34	1845.98	2143.12	1993.48	3.6705	7.29306e-05	1.87598	4.13709
sp|Q9Y251|HPSE_HUMAN	HPSE	HPSE_HUMAN Heparanase	2	27.2634	22.4736	30.3878	26.7083	79.8311	111.006	103.121	97.986	3.66875	0.00178238	1.87529	2.749							PTGER1			PHF6
sp|Q92820|GGH_HUMAN	GGH	GGH_HUMAN Gamma-glutamyl hydrolase	22	654.178	691.149	618.172	654.5	2219.41	2552.01	2421.75	2397.72	3.66344	6.11699e-05	1.8732	4.21346							OR6C1			NEUROD6
sp|Q16658|FSCN1_HUMAN	FSCN1	FSCN1_HUMAN Fascin	12	435.416	339.849	301.234	358.833	1297.44	1365.76	1273.47	1312.22	3.65691	3.95891e-05	1.87063	4.40242							OR52N5			MYBL1
sp|P35475|IDUA_HUMAN	IDUA	IDUA_HUMAN Alpha-L-iduronidase	9	144.962	166.413	145.904	152.426	515.087	604.594	551.543	557.075	3.65472	0.000114	1.86976	3.94309							S1PR3			POLE4
sp|Q8WWB7|NCUG1_HUMAN	C1orf85	NCUG1_HUMAN Lysosomal protein NCU-G1	3	108.527	109.629	107.23	108.462	412.653	367.47	408.361	396.161	3.65254	3.7199e-05	1.8689	4.42947		SELENOS				MRPL53	FAM171A1			DUX4L3	IQSEC2
sp|Q7Z3J2|CP062_HUMAN	C16orf62	CP062_HUMAN UPF0505 protein C16orf62	12	180.1	172.014	159.294	170.469	617.454	626.568	622.51	622.177	3.64979	2.73853e-07	1.86781	6.56248		SEC11C				MRPL40	ERVK-8			DROSHA	HSPH1
sp|Q08380|LG3BP_HUMAN	LGALS3BP	LG3BP_HUMAN Galectin-3-binding protein	21	405.763	462.473	451.355	439.864	1532.47	1679.12	1592.58	1601.39	3.64065	1.45608e-05	1.8642	4.83682							SNAP23			RBM47
sp|P30408|T4S1_HUMAN	TM4SF1	T4S1_HUMAN Transmembrane 4 L6 family member 1	2	91.2008	102.149	111.128	101.493	327.436	424.015	356.874	369.442	3.64008	0.000778451	1.86397	3.10877
sp|Q9BVX2|T106C_HUMAN	TMEM106C	T106C_HUMAN Transmembrane protein 106C	1	12.9139	17.2283	12.969	14.3704	50.4692	52.528	53.1141	52.0371	3.62113	2.1227e-05	1.85644	4.67311
sp|Q02083|NAAA_HUMAN	NAAA	NAAA_HUMAN N-acylethanolamine-hydrolyzing acid amidase	10	271.985	290.77	266.453	276.403	956.168	991.139	1053.96	1000.42	3.61943	1.64435e-05	1.85576	4.78401										SUN1
sp|Q7Z7N9|T179B_HUMAN	TMEM179B	T179B_HUMAN Transmembrane protein 179B	2	21.6647	26.7373	21.7619	23.388	84.2967	90.3967	79.1785	84.624	3.61827	7.39387e-05	1.8553	4.13113
sp|O00584|RNT2_HUMAN	RNASET2	RNT2_HUMAN Ribonuclease T2	10	188.744	194.746	181.805	188.432	618.9	705.917	718.734	681.184	3.61501	9.85495e-05	1.854	4.00635										ZNF619
sp|Q9BZQ8|NIBAN_HUMAN	FAM129A	NIBAN_HUMAN Protein Niban	8	119.695	120.907	112.451	117.684	422.767	449.789	402.47	425.008	3.61143	2.51808e-05	1.85257	4.59893							OR4C45			MED25
sp|P54803|GALC_HUMAN	GALC	GALC_HUMAN Galactocerebrosidase	10	350.279	229.638	234.763	271.56	948.898	1046.87	939.864	978.543	3.60342	0.000172067	1.84937	3.7643							OR5B2			NACC2
sp|Q9NP58|ABCB6_HUMAN	ABCB6	ABCB6_HUMAN ATP-binding cassette sub-family B member 6, mitochondrial	25	310.869	320.683	290.577	307.376	1076.62	1165.91	1066.82	1103.12	3.58882	1.70175e-05	1.84351	4.7691		ALG12	LMAN2	ARL17A	ATP6V0A1	ACADM	ACVRL1	CHMP2A	DAO	ADIRF	ACO1	ATG4C	ATP6V1C1	MVB12A
sp|P42345|MTOR_HUMAN	MTOR	MTOR_HUMAN Serine/threonine-protein kinase mTOR	32	589.272	527.889	507.16	541.44	1873.56	1972	1927.08	1924.21	3.55388	3.28114e-06	1.82939	5.48397										SRSF6
sp|P53634|CATC_HUMAN	CTSC	CATC_HUMAN Dipeptidyl peptidase 1	14	422.835	405.246	375.574	401.218	1096.03	1683.7	1496.28	1425.34	3.55252	0.00415368	1.82884	2.38157						TRMU	LRFN1			HIST1H1T	SPRR2G
sp|Q13332|PTPRS_HUMAN	PTPRS	PTPRS_HUMAN Receptor-type tyrosine-protein phosphatase S	10	110.683	136.799	124.093	123.858	422.323	447.941	447.077	439.114	3.54529	9.77478e-06	1.8259	5.00989										ZNF385D
sp|P14543|NID1_HUMAN	NID1	NID1_HUMAN Nidogen-1	5	37.3394	38.4798	35.0988	36.9727	129.511	131.062	132.11	130.894	3.5403	1.86559e-07	1.82387	6.72918										TEAD1
sp|Q96PQ0|SORC2_HUMAN	SORCS2	SORC2_HUMAN VPS10 domain-containing receptor SorCS2	15	251.538	237.013	216.605	235.052	806.578	856.602	822.895	828.692	3.52557	4.90486e-06	1.81786	5.30937
sp|P51688|SPHM_HUMAN	SGSH	SPHM_HUMAN N-sulphoglucosamine sulphohydrolase	14	108.143	129.678	131.448	123.09	434.25	400.78	466.744	433.924	3.52528	0.000109515	1.81774	3.96052
sp|P41273|TNFL9_HUMAN	TNFSF9	TNFL9_HUMAN Tumor necrosis factor ligand superfamily member 9	1	18.7969	12.8965	12.822	14.8385	48.0856	55.7274	53.0548	52.2892	3.5239	0.000233269	1.81717	3.63214
sp|Q9NV92|NFIP2_HUMAN	NDFIP2	NFIP2_HUMAN NEDD4 family-interacting protein 2	1	11.9089	12.6582	15.0287	13.1986	43.6687	47.943	47.8923	46.5013	3.5232	4.00523e-05	1.81689	4.39737										TAF1L
sp|P07711|CATL1_HUMAN	CTSL	CATL1_HUMAN Cathepsin L1	8	114.038	135.661	117.699	122.466	421.114	448.771	424.456	431.447	3.523	9.49513e-06	1.8168	5.0225						TSFM	LRIG1			HIST1H2AH	SPSB2
sp|P16278|BGAL_HUMAN	GLB1	BGAL_HUMAN Beta-galactosidase	24	535.833	617.807	592.245	581.962	1927.34	2100.34	2062.64	2030.11	3.48839	1.51034e-05	1.80256	4.82093							OR6K6			NFRKB
sp|P49281-3|NRAM2_HUMAN	SLC11A2	NRAM2_HUMAN Isoform 3 of Natural resistance-associated macrophage protein 2	1	11.3841	13.3617	11.6003	12.1154	41.0846	45.8391	39.6528	42.1922	3.48254	0.000107732	1.80014	3.96765
sp|P08236|BGLR_HUMAN	GUSB	BGLR_HUMAN Beta-glucuronidase	22	527.518	679.962	580.158	595.879	1970.5	2214.14	2030.14	2071.59	3.47653	6.72764e-05	1.79765	4.17214							PCDHA13			NUP160
sp|O75223|GGCT_HUMAN	GGCT	GGCT_HUMAN Gamma-glutamylcyclotransferase	2	29.6426	19.8727	24.928	24.8144	91.1214	85.3227	81.3786	85.9409	3.46335	0.000106464	1.79217	3.9728							OR6B2			NEUROD2
sp|Q9UHA4|LTOR3_HUMAN	LAMTOR3	LTOR3_HUMAN Ragulator complex protein LAMTOR3	8	165.171	137.794	132.563	145.176	433.223	558.708	512.18	501.37	3.45353	0.000721251	1.78807	3.14191							SLC7A2			RAG1
sp|Q9H3U5-6|MFSD1_HUMAN	MFSD1	MFSD1_HUMAN Isoform 6 of Major facilitator superfamily domain-containing protein 1	1	18.3295	14.6842	18.6602	17.2246	56.798	60.523	60.966	59.429	3.45023	2.12028e-05	1.78669	4.67361							TRB			SCML4
sp|O14773|TPP1_HUMAN	TPP1	TPP1_HUMAN Tripeptidyl-peptidase 1	20	294.783	327.446	288.909	303.713	991.794	1076.57	1073.85	1047.41	3.44867	1.63299e-05	1.78604	4.78702
sp|P23526|SAHH_HUMAN	AHCY	SAHH_HUMAN Adenosylhomocysteinase	9	243.84	192.75	190.838	209.143	714.42	750.98	685.327	716.909	3.42785	3.88908e-05	1.7773	4.41015		CYP4V2		FNDC3A	LGMN	C12orf65	BASP1	SNX20		BARHL2	BAG4
sp|P00558|PGK1_HUMAN	PGK1	PGK1_HUMAN Phosphoglycerate kinase 1	25	601.55	445.082	403.356	483.329	1600.22	1703.58	1641.1	1648.3	3.4103	6.57358e-05	1.7699	4.1822										ZBTB22
sp|P11413-2|G6PD_HUMAN	G6PD	G6PD_HUMAN Isoform Long of Glucose-6-phosphate 1-dehydrogenase	20	562.391	460.246	454.634	492.424	1614.96	1720.19	1691.56	1675.57	3.4027	1.48407e-05	1.76668	4.82854							OR5AP2			N4BP1
sp|Q9HAB3|S52A2_HUMAN	SLC52A2	S52A2_HUMAN Solute carrier family 52, riboflavin transporter, member 2	2	30.398	32.5674	27.3992	30.1215	99.9125	106.373	98.1917	101.493	3.36943	1.63195e-05	1.75251	4.78729
sp|O15554|KCNN4_HUMAN	KCNN4	KCNN4_HUMAN Intermediate conductance calcium-activated potassium channel protein 4	5	86.3963	120.799	116.986	108.06	355.175	368.729	367.726	363.877	3.36735	2.61424e-05	1.75161	4.58265							SLC23A1			PRDM9
sp|Q7Z3F1|GP155_HUMAN	GPR155	GP155_HUMAN Integral membrane protein GPR155	3	51.8314	49.3761	52.8148	51.3408	156.246	192.027	170.232	172.835	3.36643	0.000314062	1.75122	3.50298							OXGR1			NR1H2
sp|A8MQ03|CI169_HUMAN	C9orf169	CI169_HUMAN UPF0574 protein C9orf169	2	11.9009	15.9274	14.555	14.1277	48.2537	47.3631	46.8177	47.4782	3.36063	1.18701e-05	1.74873	4.92555		SLC33A1				MRPS18C	FER1L5			E2F4	KIAA1217
sp|Q14679|TTLL4_HUMAN	TTLL4	TTLL4_HUMAN Tubulin polyglutamylase TTLL4	1	20.9653	22.3337	15.0642	19.4544	63.8538	65.43	66.4948	65.2595	3.35448	4.14455e-05	1.74609	4.38252
sp|Q5VZI3-3|CI091_HUMAN	C9orf91	CI091_HUMAN Isoform 3 of Transmembrane protein C9orf91	2	18.1308	20.4835	15.9502	18.1882	52.8122	75.582	53.0413	60.4785	3.32516	0.00526705	1.73342	2.27843		SLC37A1				MRPS22	FFAR3			E2F7	KPNA5
sp|O75348|VATG1_HUMAN	ATP6V1G1	VATG1_HUMAN V-type proton ATPase subunit G 1	6	137.955	126.449	134.943	133.116	427.782	510.245	388.248	442.092	3.32111	0.00102337	1.73167	2.98997		P4HA1		TMBIM4		IARS2	CNNM1			CTDSP1	FBXL20
sp|O75368|SH3L1_HUMAN	SH3BGRL	SH3L1_HUMAN SH3 domain-binding glutamic acid-rich-like protein	2	41.2577	32.5292	27.0948	33.6273	106.489	116.878	111.442	111.603	3.31882	0.000106804	1.73067	3.97141
sp|Q9Y5W9|SNX11_HUMAN	SNX11	SNX11_HUMAN Sorting nexin-11	2	30.9829	35.9757	33.7531	33.5706	109.937	106.836	115.265	110.679	3.29691	1.11559e-05	1.72111	4.95249
sp|Q9UK23|NAGPA_HUMAN	NAGPA	NAGPA_HUMAN N-acetylglucosamine-1-phosphodiester alpha-N-acetylglucosaminidase	1	16.6898	18.7632	16.8339	17.429	59.0075	60.0471	53.1746	57.4097	3.29393	5.79805e-05	1.71981	4.23672										SUPT4H1
sp|P68402|PA1B2_HUMAN	PAFAH1B2	PA1B2_HUMAN Platelet-activating factor acetylhydrolase IB subunit beta	1	14.7466	12.477	10.2053	12.4763	36.6397	46.6297	39.8952	41.0548	3.29062	0.000890789	1.71836	3.05023										USF2
sp|Q01628|IFM3_HUMAN	IFITM3	IFM3_HUMAN Interferon-induced transmembrane protein 3	8	208.338	130.69	201.485	180.171	396.86	695.146	681.817	591.274	3.28174	0.0149179	1.71446	1.82629							SCARA5			POLK
sp|Q3SXY8|AR13B_HUMAN	ARL13B	AR13B_HUMAN ADP-ribosylation factor-like protein 13B	1	30.2344	28.584	29.3483	29.3889	80.5329	104.656	99.6486	94.9459	3.23067	0.000880632	1.69183	3.05521		HSD11B2		MMD2		ECHDC3	CDH8			CEBPA	DDIT4L
sp|P15848|ARSB_HUMAN	ARSB	ARSB_HUMAN Arylsulfatase B	15	353.682	376.111	383.39	371.061	1183.12	1142.76	1266.58	1197.49	3.2272	2.51939e-05	1.69028	4.59871		KDELR1		RND3		FDXR	CHRNA2			CHD2	DTD2
sp|Q9UM54|MYO6_HUMAN	MYO6	MYO6_HUMAN Unconventional myosin-VI	1	10.1656	6.33921	8.73444	8.41309	24.0504	35.2462	22.1499	27.1488	3.22697	0.0114789	1.69018	1.9401										SUGP1
sp|O60826|CCD22_HUMAN	CCDC22	CCD22_HUMAN Coiled-coil domain-containing protein 22	11	208.278	175.844	181.886	188.67	556.517	650.118	614.561	607.065	3.21761	0.00013488	1.68599	3.87005		TMEM129				MTX2	GJB4			EP400	MOCS2
sp|P10253|LYAG_HUMAN	GAA	LYAG_HUMAN Lysosomal alpha-glucosidase	26	654.882	658.169	578.298	630.449	1979.53	2064.64	2036.05	2026.74	3.21476	2.68094e-06	1.68471	5.57171							OR5AR1			N6AMT1
sp|Q8WWI5|CTL1_HUMAN	SLC44A1	CTL1_HUMAN Choline transporter-like protein 1	4	62.7925	73.9778	75.8923	70.8875	214.151	240.481	224.021	226.218	3.19122	5.78038e-05	1.67411	4.23804
sp|Q9UJ68|MSRA_HUMAN	MSRA	MSRA_HUMAN Mitochondrial peptide methionine sulfoxide reductase	1	16.5358	18.0047	15.344	16.6282	52.5397	53.8052	52.397	52.914	3.18219	2.1643e-06	1.67002	5.66468							ZDHHC5			SPDEF
sp|P86791|CCZ1_HUMAN	CCZ1	CCZ1_HUMAN Vacuolar fusion protein CCZ1 homolog	7	129.121	134.039	121.062	128.074	391.286	447.431	382.391	407.036	3.17813	0.0001757	1.66818	3.75523		TPTE2				NDUFAF5	GNRHR			ESRG	NBPF11
sp|Q8NHP8|PLBL2_HUMAN	PLBD2	PLBL2_HUMAN Putative phospholipase B-like 2	17	389.995	425.646	538.571	451.404	1297.29	1481.51	1496.58	1425.13	3.1571	0.000238807	1.6586	3.62195										ZEB2
sp|Q9NVJ2|ARL8B_HUMAN	ARL8B	ARL8B_HUMAN ADP-ribosylation factor-like protein 8B	24	657.723	580.802	553.313	597.279	1781.25	1977.52	1889.1	1882.62	3.15199	3.8075e-05	1.65626	4.41936		HSPA5		NUCB1		ETFB	CEACAM5			CENPC	DHX29
sp|Q14764|MVP_HUMAN	MVP	MVP_HUMAN Major vault protein	20	488.376	396.362	373.87	419.536	1271.88	1386.43	1289.1	1315.8	3.13633	5.68659e-05	1.64908	4.24515										SSRP1
sp|O14684|PTGES_HUMAN	PTGES	PTGES_HUMAN Prostaglandin E synthase	1	18.5046	14.6502	15.5868	16.2472	43.0068	54.3318	55.4287	50.9224	3.13422	0.00110798	1.64811	2.95547										ZNF341
sp|P61225|RAP2B_HUMAN	RAP2B	RAP2B_HUMAN Ras-related protein Rap-2b	6	104.128	101.552	97.9522	101.211	312.795	319.317	310.386	314.166	3.10408	3.10541e-07	1.63416	6.50788										ZNF542P
sp|Q9NRX5|SERC1_HUMAN	SERINC1	SERC1_HUMAN Serine incorporator 1	4	63.7047	55.4739	57.0824	58.7537	166.751	190.292	185.748	180.93	3.07947	8.92747e-05	1.62268	4.04927
sp|Q08334|I10R2_HUMAN	IL10RB	I10R2_HUMAN Interleukin-10 receptor subunit beta	1	32.8782	35.3725	36.2361	34.8289	101.666	106.483	112.409	106.853	3.06793	2.50223e-05	1.61726	4.60167							SDC3			POLR2F
sp|O43396|TXNL1_HUMAN	TXNL1	TXNL1_HUMAN Thioredoxin-like protein 1	1	30.4638	19.9613	20.5246	23.6499	72.4568	71.8464	71.8495	72.0509	3.04656	0.000144194	1.60718	3.84105
sp|Q6NUT3-3|MFS12_HUMAN	MFSD12	MFS12_HUMAN Isoform 3 of Major facilitator superfamily domain-containing protein 12	2	38.7512	43.5145	47.0374	43.101	110.166	139.979	142.946	131.031	3.04008	0.00121195	1.60411	2.91651							TRBD1			SCRT2
sp|O94886|TM63A_HUMAN	TMEM63A	TM63A_HUMAN Transmembrane protein 63A	6	57.1062	63.0329	54.2742	58.1377	176.481	182.285	170.998	176.588	3.03741	9.02451e-06	1.60284	5.04458
sp|P33947|ERD22_HUMAN	KDELR2	ERD22_HUMAN ER lumen protein retaining receptor 2	1	25.7993	20.6765	29.0123	25.1627	76.0896	82.717	69.1535	75.9867	3.01981	0.000383851	1.59446	3.41584							SLC26A3			PRM1
sp|Q13393|PLD1_HUMAN	PLD1	PLD1_HUMAN Phospholipase D1	21	421.861	410.015	427.22	419.699	1226.56	1291.51	1278.79	1265.62	3.01555	2.06599e-06	1.59242	5.68487										ZFHX2
sp|Q8N3Z6|ZCHC7_HUMAN	ZCCHC7	ZCHC7_HUMAN Zinc finger CCHC domain-containing protein 7	1	7.43083	8.35138	7.33728	7.7065	21.6537	23.3406	24.5522	23.1822	3.00813	6.72945e-05	1.58887	4.17202
sp|P29323|EPHB2_HUMAN	EPHB2	EPHB2_HUMAN Ephrin type-B receptor 2	7	74.027	83.9515	67.1397	75.0394	238.951	219.782	217.572	225.435	3.00423	5.61195e-05	1.58699	4.25089							OR2F2			LYRM1
sp|O43688-2|LPP2_HUMAN	PPAP2C	LPP2_HUMAN Isoform 2 of Lipid phosphate phosphohydrolase 2	2	39.2574	48.8784	46.3045	44.8134	126.827	143.397	133.503	134.576	3.00302	8.90097e-05	1.58641	4.05056										ZNF112
sp|P14618|KPYM_HUMAN	PKM	KPYM_HUMAN Pyruvate kinase PKM	3	84.9603	58.297	53.5091	65.5888	193.548	210.995	185.981	196.842	3.00114	0.000432871	1.58551	3.36364										ZC3H8
sp|O75503|CLN5_HUMAN	CLN5	CLN5_HUMAN Ceroid-lipofuscinosis neuronal protein 5	8	243.824	262.556	235.319	247.233	772.131	607.758	842.708	740.866	2.99663	0.0021398	1.58334	2.66963						RHOT2	HPN			FTSJ3	PITPNC1
sp|P36639|8ODP_HUMAN	NUDT1	8ODP_HUMAN 7,8-dihydro-8-oxoguanine triphosphatase	1	13.7065	13.301	11.353	12.7868	36.8817	41.4312	36.5097	38.2742	2.99325	0.000126647	1.58171	3.89741										TOE1
sp|Q86SJ2|AMGO2_HUMAN	AMIGO2	AMGO2_HUMAN Amphoterin-induced protein 2	2	49.0698	40.7286	44.4383	44.7456	127.37	131.979	141.854	133.734	2.98877	5.43443e-05	1.57955	4.26485		ELOVL7		GGA3	SLC36A1	COX14	CCKBR	WASHC2A		BUD13	CASTOR2
sp|Q9H1C4|UN93B_HUMAN	UNC93B1	UN93B_HUMAN Protein unc-93 homolog B1	6	102.499	118.005	116.537	112.347	337.242	326.226	342.074	335.181	2.98343	5.21019e-06	1.57697	5.28315
sp|Q96QK1|VPS35_HUMAN	VPS35	VPS35_HUMAN Vacuolar protein sorting-associated protein 35	7	114.751	84.7047	90.9341	96.7966	267.538	309.104	288.611	288.417	2.97963	0.000221706	1.57513	3.65422
sp|P78382|S35A1_HUMAN	SLC35A1	S35A1_HUMAN CMP-sialic acid transporter	2	21.9272	19.4662	17.9557	19.783	48.8451	68.0843	59.5376	58.8224	2.97338	0.00235439	1.5721	2.62812
sp|P78552|I13R1_HUMAN	IL13RA1	I13R1_HUMAN Interleukin-13 receptor subunit alpha-1	3	67.9413	68.165	62.3753	66.1605	197.473	194.981	194.094	195.516	2.95518	4.54441e-07	1.56325	6.34252							SDK1			POLR2G
sp|P16870|CBPE_HUMAN	CPE	CBPE_HUMAN Carboxypeptidase E	1	10.5613	11.1991	8.4603	10.0735	26.8745	37.9859	24.1162	29.6589	2.94423	0.0105393	1.55789	1.97719						SURF1	KCTD8			H2AFX	S100A3
sp|Q8IWA5-2|CTL2_HUMAN	SLC44A2	CTL2_HUMAN Isoform 2 of Choline transporter-like protein 2	2	37.6366	51.8351	46.7718	45.4145	128.46	141.367	130.684	133.503	2.93967	0.000106326	1.55565	3.97336
sp|P30464|1B15_HUMAN	HLA-B	1B15_HUMAN HLA class I histocompatibility antigen, B-15 alpha chain	21	522.595	574.199	557.445	551.413	1681.36	1577.14	1591.13	1616.54	2.93164	7.78977e-06	1.55171	5.10848							PDZK1			PAX3
sp|P51809|VAMP7_HUMAN	VAMP7	VAMP7_HUMAN Vesicle-associated membrane protein 7	12	216.725	179.506	197.776	198.002	495.633	696.956	548.21	580.266	2.9306	0.00335639	1.5512	2.47413
sp|P55786|PSA_HUMAN	NPEPPS	PSA_HUMAN Puromycin-sensitive aminopeptidase	24	591.903	603.419	577.185	590.836	1734.89	1676.94	1780.55	1730.8	2.9294	3.23431e-06	1.55061	5.49022										TIGD2
sp|Q6UWY0|ARSK_HUMAN	ARSK	ARSK_HUMAN Arylsulfatase K	1	101.35	98.6082	113.748	104.568	299.474	310.983	308.016	306.158	2.92782	4.07717e-06	1.54983	5.38964		KDELR2		RNF125		FECH	CHRNA3			CHD5	DTNB
sp|Q96NT5|PCFT_HUMAN	SLC46A1	PCFT_HUMAN Proton-coupled folate transporter	3	66.4098	69.7639	66.4149	67.5295	191.725	209.114	191.709	197.516	2.92488	2.52151e-05	1.54838	4.59834
sp|P61158|ARP3_HUMAN	ACTR3	ARP3_HUMAN Actin-related protein 3	4	91.3081	87.08	78.3885	85.5922	231.49	273.105	243.784	249.459	2.91451	0.000222329	1.54325	3.653		CYP26B1		COG4	GGH	ATP5MC2	AQP1	RAP2B		ASH1L	ARHGAP18	VPS34	TSC2
sp|Q13277|STX3_HUMAN	STX3	STX3_HUMAN Syntaxin-3	6	187.01	178.119	191.637	185.588	556.977	546.532	517.277	540.262	2.91108	9.25748e-06	1.54155	5.03351
sp|Q562E7|WDR81_HUMAN	WDR81	WDR81_HUMAN WD repeat-containing protein 81	3	56.2551	47.5116	45.309	49.6919	139.077	147.511	146.32	144.303	2.90395	2.4256e-05	1.53801	4.61518
sp|O14972|DSCR3_HUMAN	DSCR3	DSCR3_HUMAN Down syndrome critical region protein 3	3	43.8555	31.3053	36.3256	37.1621	98.0342	116.854	108.022	107.637	2.89641	0.000422106	1.53427	3.37458							OR10G7			KANSL3
sp|Q5VW32|BROX_HUMAN	BROX	BROX_HUMAN BRO1 domain-containing protein BROX	5	80.4522	68.5778	71.2946	73.4415	206.227	220.919	210.538	212.562	2.8943	1.61359e-05	1.53321	4.79221		RETSAT				MRPL13	EFNA2			DMRT2	HEBP1
sp|P19438|TNR1A_HUMAN	TNFRSF1A	TNR1A_HUMAN Tumor necrosis factor receptor superfamily member 1A	3	29.6608	33.6669	37.5128	33.6135	116.309	69.0427	106.039	97.1302	2.88962	0.0119582	1.53088	1.92234
sp|P30086|PEBP1_HUMAN	PEBP1	PEBP1_HUMAN Phosphatidylethanolamine-binding protein 1	5	161.493	118.672	118.813	132.993	374.209	398.395	376.798	383.134	2.88087	0.000102216	1.5265	3.99048										YEATS2
sp|P49588|SYAC_HUMAN	AARS	SYAC_HUMAN Alanine--tRNA ligase, cytoplasmic	9	166.609	135.817	117.547	139.991	396.089	421.641	389.785	402.505	2.87522	0.000110338	1.52367	3.95727		ACER1	COPZ2	ABO	ACP5	ABAT	ABCB5	AMOTL2	ACAA1	ABT1	AARS1	ATG101	ATP6V0A4	CHMP2B
sp|Q9UMR5|PPT2_HUMAN	PPT2	PPT2_HUMAN Lysosomal thioesterase PPT2	5	121.639	114.847	112.094	116.193	304.757	357.209	340.164	334.043	2.87489	0.000156628	1.52351	3.80513										ZNF189
sp|Q8IYL3|CA174_HUMAN	C1orf174	CA174_HUMAN UPF0688 protein C1orf174	1	17.276	12.0357	13.1601	14.1573	35.7979	44.6698	41.4653	40.6443	2.87092	0.000960255	1.52151	3.01761		SELENOF				MRPL51	F2RL3			DUX4	INMT
sp|Q8TCT7|SPP2B_HUMAN	SPPL2B	SPP2B_HUMAN Signal peptide peptidase-like 2B	3	42.962	50.11	45.8387	46.3036	127.815	142.289	128.521	132.875	2.86965	7.3326e-05	1.52087	4.13474
sp|Q969J3|L12R1_HUMAN	LOH12CR1	L12R1_HUMAN Loss of heterozygosity 12 chromosomal region 1 protein	6	141.012	91.9836	105.757	112.917	293.597	368.937	305.115	322.55	2.85651	0.00161349	1.51425	2.79223							TACR1			REL
sp|P28799|GRN_HUMAN	GRN	GRN_HUMAN Granulins	4	169.986	229.241	194.779	198.002	627.546	555.123	513.898	565.522	2.85615	0.000601145	1.51407	3.22102							PANX2			NRIP1
sp|Q9Y2D2-2|S35A3_HUMAN	SLC35A3	S35A3_HUMAN Isoform 2 of UDP-N-acetylglucosamine transporter	1	19.1433	18.5963	19.1513	18.9636	47.5407	56.8312	57.939	54.1036	2.85302	0.000441548	1.51249	3.35502
sp|Q8NCC3|PAG15_HUMAN	PLA2G15	PAG15_HUMAN Group XV phospholipase A2	5	92.5964	101.753	93.4015	95.9169	255.297	281.774	279.889	272.32	2.83913	4.026e-05	1.50545	4.39513										ZCCHC17
sp|P08758|ANXA5_HUMAN	ANXA5	ANXA5_HUMAN Annexin A5	18	675.822	404.961	364.151	481.645	1291.43	1531.21	1259.94	1360.86	2.82545	0.0024939	1.49848	2.60312		ERP44		GOLGB1	TPP1	COX7B	CD24			CBX3	CDKL3
sp|O00115|DNS2A_HUMAN	DNASE2	DNS2A_HUMAN Deoxyribonuclease-2-alpha	6	127.745	139.765	124.688	130.733	357.012	398.968	351.526	369.169	2.82384	0.000108896	1.49766	3.96299							OPCML			IRX1
sp|P13693|TCTP_HUMAN	TPT1	TCTP_HUMAN Translationally-controlled tumor protein	1	91.064	61.0624	63.8675	71.998	170.538	236.531	201.044	202.704	2.81542	0.00359594	1.49335	2.44419
sp|P00338-3|LDHA_HUMAN	LDHA	LDHA_HUMAN Isoform 3 of L-lactate dehydrogenase A chain	20	758.773	563.181	578.103	633.352	1693.26	1904.91	1739.47	1779.21	2.8092	0.000218137	1.49016	3.66127							SLCO2B1			RBL2
sp|Q13637|RAB32_HUMAN	RAB32	RAB32_HUMAN Ras-related protein Rab-32	15	354.333	357.708	344.715	352.252	952.154	1024.02	981.648	985.939	2.79896	7.4823e-06	1.48489	5.12596										ZNF484
sp|P25106|ACKR3_HUMAN	ACKR3	ACKR3_HUMAN Atypical chemokine receptor 3	2	52.1544	47.4711	41.7356	47.1203	133.131	130.145	132.007	131.761	2.79627	1.12054e-05	1.4835	4.95057		CERS4		CASD1	CTSA	ALDH2	AKAP7	PLIN3	PEX5	ARHGAP39	AKT1S1	PEX14	PRKAB2
sp|P34932|HSP74_HUMAN	HSPA4	HSP74_HUMAN Heat shock 70 kDa protein 4	9	187.038	145.366	131.961	154.788	419.069	443.998	431.237	431.435	2.78725	0.000106339	1.47884	3.97331							RELL1			PKNOX2
sp|Q9H3G5|CPVL_HUMAN	CPVL	CPVL_HUMAN Probable serine carboxypeptidase CPVL	2	38.419	40.2277	32.7213	37.1227	102.678	95.2309	111.597	103.169	2.77913	0.000228714	1.47463	3.64071						THEM5	KIR3DL2			H2BFWT	SDS
sp|Q9HD42|CHM1A_HUMAN	CHMP1A	CHM1A_HUMAN Charged multivesicular body protein 1a	4	109.397	87.3589	89.2316	95.3293	245.799	317.815	230.561	264.725	2.77696	0.00367656	1.4735	2.43456						PDPR	GRIA4			FOXC1	PAFAH1B2
sp|O95295|SNAPN_HUMAN	SNAPIN	SNAPN_HUMAN SNARE-associated protein Snapin	3	100.548	65.1283	72.7553	79.4772	199.108	261.192	200.208	220.169	2.77022	0.00371352	1.47	2.43021
sp|Q9BY89|K1671_HUMAN	KIAA1671	K1671_HUMAN Uncharacterized protein KIAA1671	1	4.73439	6.32063	7.96666	6.34056	17.2695	18.2685	17.0256	17.5212	2.76335	0.000375244	1.46642	3.42569							SLC35G2			PRR12
sp|P08133|ANXA6_HUMAN	ANXA6	ANXA6_HUMAN Annexin A6	8	127.627	100.723	96.4111	108.254	284.061	322.697	286.348	297.702	2.75003	0.00028246	1.45945	3.54904		EXTL1		GOLIM4	TSPAN1	COX7B2	CD244			CBX4	CDKL4
sp|P0CG48|UBC_HUMAN	UBC	UBC_HUMAN Polyubiquitin-C	28	789.475	753.033	780.685	774.398	2201.48	1989.64	2189.86	2126.99	2.74664	4.14038e-05	1.45767	4.38296
sp|P52565|GDIR1_HUMAN	ARHGDIA	GDIR1_HUMAN Rho GDP-dissociation inhibitor 1	3	43.517	41.1125	35.5063	40.0453	113.27	112.242	102.443	109.318	2.72987	7.82186e-05	1.44883	4.10669		HHATL		MGAT4A		DNAJC19	CDH3			CDX4	CUL9
sp|P10586|PTPRF_HUMAN	PTPRF	PTPRF_HUMAN Receptor-type tyrosine-protein phosphatase F	15	227.33	251.529	230.213	236.357	644.974	649.717	637.059	643.917	2.72433	1.12005e-06	1.4459	5.95076										ZNF382
sp|Q9Y487|VPP2_HUMAN	ATP6V0A2	VPP2_HUMAN V-type proton ATPase 116 kDa subunit a isoform 2	16	306.808	343.204	339.608	329.873	869.213	932.772	885.913	895.966	2.71609	1.42254e-05	1.44153	4.84694		ORMDL2		STX6		HOGA1	CLEC5A			CSRP2	FAIM
sp|P07195|LDHB_HUMAN	LDHB	LDHB_HUMAN L-lactate dehydrogenase B chain	18	474.527	419.596	402.713	432.279	1166.91	1186.6	1165.96	1173.15	2.71389	5.25364e-06	1.44036	5.27954							SLCO3A1			RBM10
sp|P78417|GSTO1_HUMAN	GSTO1	GSTO1_HUMAN Glutathione S-transferase omega-1	4	72.4711	66.6591	64.5044	67.8782	179.015	203.249	168.439	183.567	2.70436	0.00039646	1.43529	3.4018							PCDH11Y			NSRP1
sp|P17931|LEG3_HUMAN	LGALS3	LEG3_HUMAN Galectin-3	5	128.975	99.751	124.688	117.805	289.737	349.86	307.63	315.742	2.68022	0.000586985	1.42235	3.23137							SMIM9			RBM39
sp|Q96C24|SYTL4_HUMAN	SYTL4	SYTL4_HUMAN Synaptotagmin-like protein 4	6	87.4954	99.4128	95.8059	94.238	277.033	236.759	242.755	252.182	2.67601	0.000265895	1.42009	3.57529
sp|P04004|VTNC_HUMAN	VTN	VTNC_HUMAN Vitronectin	2	107.681	101.496	69.0768	92.7515	231.553	262.476	249.77	247.933	2.67309	0.000487779	1.41851	3.31178
sp|Q99650|OSMR_HUMAN	OSMR	OSMR_HUMAN Oncostatin-M-specific receptor subunit beta	10	149.506	175.373	148.842	157.907	406.251	437.365	420.768	421.462	2.66905	3.02322e-05	1.41633	4.51953										UBE2T
sp|Q9UHL4|DPP2_HUMAN	DPP7	DPP2_HUMAN Dipeptidyl peptidase 2	17	432.721	439.843	438.672	437.079	1129.66	1232.12	1134.19	1165.32	2.66616	2.64824e-05	1.41476	4.57704							OR10AC1			JAZF1
sp|O15400|STX7_HUMAN	STX7	STX7_HUMAN Syntaxin-7	13	336.651	302.164	315.835	318.217	768.763	898.019	874.751	847.178	2.66227	0.000208608	1.41266	3.68067
sp|P51790|CLCN3_HUMAN	CLCN3	CLCN3_HUMAN H(+)/Cl(-) exchange transporter 3	7	187.685	196.293	185.758	189.912	544.18	427.458	543.371	505.003	2.65914	0.00126377	1.41096	2.89833						PTCD1	HCAR1			FOXN4	PGK2
sp|P06733|ENOA_HUMAN	ENO1	ENOA_HUMAN Alpha-enolase	42	1045.72	1027.46	914.426	995.867	2595.48	2665.36	2619.57	2626.8	2.6377	3.74116e-06	1.39928	5.42699							OR2B3			LSM5
sp|P04083|ANXA1_HUMAN	ANXA1	ANXA1_HUMAN Annexin A1	12	480.171	244.018	265.373	329.854	839.463	975.387	793.689	869.513	2.63606	0.00440061	1.39838	2.35649		ERN2		GOLGA7	TMEM192	COX6C	CD19			CASZ1	CDC123
sp|Q6RW13|ATRAP_HUMAN	AGTRAP	ATRAP_HUMAN Type-1 angiotensin II receptor-associated protein	4	112.097	92.2886	87.8969	97.4275	245.948	257.109	266.642	256.566	2.63341	7.59211e-05	1.39693	4.11964		CYP4F22		FAM91A1	LAPTM4A	BOLA3	AVPR1B	SNX18		BANP	ATXN8OS
sp|P26374|RAE2_HUMAN	CHML	RAE2_HUMAN Rab proteins geranylgeranyltransferase component A 2	1	9.20507	8.11379	9.14582	8.82156	22.2432	24.0372	23.3722	23.2175	2.6319	2.20338e-05	1.39611	4.65691						PDP2	GRIA3			FOXB2	PADI3
sp|Q96B36-3|AKTS1_HUMAN	AKT1S1	AKTS1_HUMAN Isoform 3 of Proline-rich AKT1 substrate 1	2	63.7931	52.2998	53.9757	56.6895	150.881	147.914	148.804	149.2	2.63188	1.5041e-05	1.39609	4.82272		DIO1		GALNT14	NPRL3	CKMT2	C5AR2	VIPAS39		BHLHA15	BRINP1
sp|Q99732|LITAF_HUMAN	LITAF	LITAF_HUMAN Lipopolysaccharide-induced tumor necrosis factor-alpha factor	1	36.4003	28.6976	32.077	32.3916	80.0794	91.6589	83.5915	85.1099	2.62753	0.000208697	1.39371	3.68048							STOML3			RBMXL2
sp|Q9NZ08-2|ERAP1_HUMAN	ERAP1	ERAP1_HUMAN Isoform 2 of Endoplasmic reticulum aminopeptidase 1	17	304.486	399.288	339.639	347.804	969.37	813.45	958.521	913.78	2.62728	0.000592502	1.39357	3.22731							OR2K2			MAGEA10
sp|Q13873|BMPR2_HUMAN	BMPR2	BMPR2_HUMAN Bone morphogenetic protein receptor type-2	1	6.173	4.84353	4.4096	5.14204	14.4274	13.6846	12.3951	13.5024	2.62588	0.000465035	1.3928	3.33251		RCN1				MMUT	DSC3			DIEXF	GSTT2
sp|Q9HAT2|SIAE_HUMAN	SIAE	SIAE_HUMAN Sialate O-acetylesterase	12	260.657	289.181	267.271	272.369	687.643	687.453	765.919	713.672	2.62023	8.82974e-05	1.3897	4.05405
sp|Q9Y3E7|CHMP3_HUMAN	CHMP3	CHMP3_HUMAN Charged multivesicular body protein 3	2	33.754	28.6837	30.4978	30.9785	71.9866	95.8924	75.2229	81.0339	2.61581	0.00279692	1.38726	2.55332						PET117	GRIK1			FOXD3	PAK3
sp|P08842|STS_HUMAN	STS	STS_HUMAN Steryl-sulfatase	9	161.257	185.134	169.224	171.872	452.875	454.819	441.02	449.571	2.61574	4.61855e-06	1.38722	5.33549
sp|O75882|ATRN_HUMAN	ATRN	ATRN_HUMAN Attractin	2	18.9173	24.6239	21.7406	21.7606	54.7811	57.8848	58.0792	56.915	2.61551	5.72024e-05	1.38709	4.24259		PDIA3		TMEM115		IMMP1L	CNTN3			CUX2	FEM1A
sp|Q12830|BPTF_HUMAN	BPTF	BPTF_HUMAN Nucleosome-remodeling factor subunit BPTF	1	33.7301	39.84	34.5715	36.0472	75.3013	149.39	57.9748	94.2219	2.61385	0.107186	1.38617	0.969862		RDH5				MRM3	DUOX2			DLX5	GUCY1A2
sp|Q96FH0|MF2NB_HUMAN	MEF2BNB	MF2NB_HUMAN Protein MEF2BNB	2	44.4478	37.4483	43.9176	41.9379	84.4661	146.084	98.0102	109.52	2.61149	0.0229823	1.38487	1.63861							TRAV4			SARNP
sp|O00214-2|LEG8_HUMAN	LGALS8	LEG8_HUMAN Isoform 2 of Galectin-8	3	89.8241	117.122	112.898	106.615	278.612	278.137	277.178	277.976	2.60729	3.56322e-05	1.38255	4.44816							SPAM1			RBM4B
sp|P04066|FUCO_HUMAN	FUCA1	FUCO_HUMAN Tissue alpha-L-fucosidase	12	517.772	533.305	539.65	530.242	1324.1	1395.37	1419.28	1379.58	2.6018	8.45111e-06	1.37951	5.07309							OR56A4			MYEF2
sp|Q15262-2|PTPRK_HUMAN	PTPRK	PTPRK_HUMAN Isoform 2 of Receptor-type tyrosine-protein phosphatase kappa	5	85.5795	102.65	88.781	92.3367	253.192	220.72	244.944	239.619	2.59505	0.000184066	1.37576	3.73503										ZNF385B
sp|P49773|HINT1_HUMAN	HINT1	HINT1_HUMAN Histidine triad nucleotide-binding protein 1	2	53.0209	33.9566	31.0104	39.3293	94.7027	100.404	110.566	101.891	2.5907	0.00166934	1.37334	2.77745							PCDHGA7			PAK1IP1
sp|Q9H444|CHM4B_HUMAN	CHMP4B	CHM4B_HUMAN Charged multivesicular body protein 4b	13	365.544	239.617	280.171	295.111	690.176	837.295	756.968	761.48	2.58032	0.00117076	1.36755	2.93153						PGS1	GRIK2			FOXD4	PAK4
sp|P40925-3|MDHC_HUMAN	MDH1	MDHC_HUMAN Isoform 3 of Malate dehydrogenase, cytoplasmic	11	185.661	168.703	183.092	179.152	450.674	475.005	458.675	461.452	2.57575	5.87275e-06	1.36499	5.23116							TRAV35			SAMHD1
sp|P26572|MGAT1_HUMAN	MGAT1	MGAT1_HUMAN Alpha-1,3-mannosyl-glycoprotein 2-beta-N-acetylglucosaminyltransferase	1	19.3843	17.1544	22.0627	19.5338	45.1459	57.1817	48.4025	50.2434	2.57213	0.00135765	1.36296	2.86721							TRBJ1-4			SEBOX
sp|P18669|PGAM1_HUMAN	PGAM1	PGAM1_HUMAN Phosphoglycerate mutase 1	8	167.657	142.599	127.473	145.91	367.142	400.258	354.939	374.113	2.56401	0.000218355	1.3584	3.66084										ZBTB2
sp|P26038|MOES_HUMAN	MSN	MOES_HUMAN Moesin	48	1318.87	1231.34	1269.85	1273.35	3168.75	3389.06	3187.36	3248.39	2.55105	1.23242e-05	1.35109	4.90924							ZAN			SPC25
sp|O60701|UGDH_HUMAN	UGDH	UGDH_HUMAN UDP-glucose 6-dehydrogenase	6	116.746	66.8707	75.5403	86.3857	200.679	234.789	224.514	219.994	2.54665	0.00191242	1.3486	2.71842
sp|Q99988|GDF15_HUMAN	GDF15	GDF15_HUMAN Growth/differentiation factor 15	1	6.00568	8.26278	7.00129	7.08992	18.0429	18.9455	16.9285	17.9723	2.53491	0.000241041	1.34193	3.61791							OR5M9			NEIL2
sp|Q8WUM4|PDC6I_HUMAN	PDCD6IP	PDC6I_HUMAN Programmed cell death 6-interacting protein	36	1036.8	853.044	867.306	919.049	2150.96	2523.17	2289.73	2321.29	2.52575	0.000344183	1.33671	3.46321										WDR4
sp|P51149|RAB7A_HUMAN	RAB7A	RAB7A_HUMAN Ras-related protein Rab-7a	22	544.946	520.289	468.075	511.103	1050.59	1442.55	1366.75	1286.63	2.51735	0.00315318	1.33191	2.50125										ZNF501
sp|P61421|VA0D1_HUMAN	ATP6V0D1	VA0D1_HUMAN V-type proton ATPase subunit d 1	14	602.652	564.266	585.398	584.105	1198.31	1766.9	1411.45	1458.89	2.49764	0.00624184	1.32057	2.20469		ORMDL3		SYN1		HRK	CLECL1			CSTF1	FAM114A1
sp|P31431|SDC4_HUMAN	SDC4	SDC4_HUMAN Syndecan-4	6	164.5	211.735	187.485	187.907	488.043	399.093	520.052	469.063	2.49625	0.00190076	1.31976	2.72107										ZNF92
sp|P25787|PSA2_HUMAN	PSMA2	PSA2_HUMAN Proteasome subunit alpha type-2	5	154.678	131.898	122.761	136.446	339.712	349.702	330.269	339.894	2.49106	5.07352e-05	1.31676	4.29469										ZNF276
sp|P63313|TYB10_HUMAN	TMSB10	TYB10_HUMAN Thymosin beta-10	4	223.254	206.24	174.403	201.299	482.251	581.861	439.953	501.355	2.4906	0.00250747	1.31649	2.60076
sp|Q9UQV4|LAMP3_HUMAN	LAMP3	LAMP3_HUMAN Lysosome-associated membrane glycoprotein 3	2	40.0903	45.3093	41.3002	42.2332	106.139	113.934	95.1979	105.09	2.48833	0.000373541	1.31518	3.42766							SLC6A5			RAD54L
sp|Q9BVC4|LST8_HUMAN	MLST8	LST8_HUMAN Target of rapamycin complex subunit LST8	6	74.9028	62.6564	51.6382	63.0658	157.379	154.277	159.006	156.887	2.48768	0.000165617	1.3148	3.7809							TRBV13			SF3B4
sp|Q15149-4|PLEC_HUMAN	PLEC	PLEC_HUMAN Isoform 4 of Plectin	1	6.03214	6.6467	6.84711	6.50865	14.2274	17.8199	16.3364	16.1279	2.47792	0.000849723	1.30913	3.07072										ZFP2
sp|Q13530|SERC3_HUMAN	SERINC3	SERC3_HUMAN Serine incorporator 3	4	111.675	116.401	116.642	114.906	292.131	291.715	269.825	284.557	2.47643	2.31364e-05	1.30826	4.6357
sp|Q8N726|CD2A2_HUMAN	CDKN2A	CD2A2_HUMAN Cyclin-dependent kinase inhibitor 2A, isoform 4	2	41.5675	39.9412	34.7611	38.7566	113.591	65.7289	108.242	95.854	2.47323	0.020178	1.3064	1.69512		ZNRF4				OSGEPL1	GPR31			FANCM	NREP
sp|Q9P2R3-4|ANFY1_HUMAN	ANKFY1	ANFY1_HUMAN Isoform 4 of Ankyrin repeat and FYVE domain-containing protein 1	3	25.8292	25.3523	27.2934	26.1583	60.3853	68.9965	64.6777	64.6865	2.47288	0.00011246	1.30619	3.949		EPHX1		GKAP1	SLC38A9	COX16	CCR10	WASHC3		C11orf1	CBR3
sp|Q92484|ASM3A_HUMAN	SMPDL3A	ASM3A_HUMAN Acid sphingomyelinase-like phosphodiesterase 3a	9	220.253	224.312	204.067	216.211	510.699	543.238	546.218	533.385	2.46697	1.64788e-05	1.30274	4.78307
sp|P09525|ANXA4_HUMAN	ANXA4	ANXA4_HUMAN Annexin A4	2	27.7273	21.4682	17.3661	22.1872	53.7269	59.7538	50.6408	54.7071	2.4657	0.00128035	1.302	2.89267		ERP29		GOLGA8IP	TPCN2	COX7A2P2	CD226			CBX2	CDCA3
sp|Q7Z4F1|LRP10_HUMAN	LRP10	LRP10_HUMAN Low-density lipoprotein receptor-related protein 10	4	76.9355	84.8898	116.148	92.6577	242.833	197.455	245.09	228.46	2.46563	0.0022756	1.30196	2.6429							TBC1D3B			RFX1
sp|P11233|RALA_HUMAN	RALA	RALA_HUMAN Ras-related protein Ral-A	7	294.472	372.08	344.133	336.895	847.169	830.144	812.422	829.912	2.46341	3.78492e-05	1.30066	4.42194										ZNF524
sp|O14939|PLD2_HUMAN	PLD2	PLD2_HUMAN Phospholipase D2	1	12.4413	16.0012	11.5495	13.3307	23.9838	57.115	17.0381	32.7123	2.45391	0.194218	1.29508	0.711711										ZFHX4
sp|Q96B45|CJ032_HUMAN	C10orf32	CJ032_HUMAN UPF0693 protein C10orf32	2	23.3378	13.0311	17.8257	18.0649	37.017	54.561	41.2022	44.2601	2.45006	0.0124963	1.29282	1.90322		RTN3				MRPL3	EPHB3			DNTTIP2	HSD17B14
sp|Q9BTY2|FUCO2_HUMAN	FUCA2	FUCO2_HUMAN Plasma alpha-L-fucosidase	16	427.073	466.037	441.982	445.031	1038.18	1114.34	1114.92	1089.15	2.44735	2.08535e-05	1.29122	4.68082							OR56A5			MYF5
sp|P59998-3|ARPC4_HUMAN	ARPC4	ARPC4_HUMAN Isoform 3 of Actin-related protein 2/3 complex subunit 4	1	51.2783	37.8981	33.9508	41.0424	74.1814	166.51	60.3641	100.352	2.44508	0.153499	1.28988	0.813895		JAGN1		QSOX1		FASTKD2	CHRM3			CENPW	DPP8
sp|P61073-2|CXCR4_HUMAN	CXCR4	CXCR4_HUMAN Isoform 2 of C-X-C chemokine receptor type 4	4	85.1872	114.167	95.6497	98.3346	237.227	229.198	249.569	238.665	2.42707	0.000170539	1.27921	3.76818						UQCC2	LRRTM4			HIST2H2BF	STK11IP
sp|Q9Y5Z0|BACE2_HUMAN	BACE2	BACE2_HUMAN Beta-secretase 2	2	41.7971	51.2181	42.3204	45.1119	114.148	107.55	106.711	109.47	2.42663	7.55526e-05	1.27895	4.12175		PIGS		TRAPPC4		LONP1	CT83			DCK	GIMAP4
sp|P09211|GSTP1_HUMAN	GSTP1	GSTP1_HUMAN Glutathione S-transferase P	5	97.9057	72.0953	77.7154	82.5722	157.367	240.774	200.463	199.535	2.41649	0.00989243	1.27291	2.0047							PCDH17			NTMT1
sp|P06737|PYGL_HUMAN	PYGL	PYGL_HUMAN Glycogen phosphorylase, liver form	6	128.725	110.022	121.469	120.072	294.198	303.496	271.313	289.669	2.41245	0.000103401	1.2705	3.98547										ZNF431
sp|P15121|ALDR_HUMAN	AKR1B1	ALDR_HUMAN Aldose reductase	4	96.3705	104.488	98.2733	99.7107	228.568	266.631	225.604	240.268	2.40965	0.000471697	1.26882	3.32634		DHDDS		GALNT11	NPC1	CISD1	BTN3A3	TMEM108		BDP1	BMX
sp|P51151|RAB9A_HUMAN	RAB9A	RAB9A_HUMAN Ras-related protein Rab-9A	14	333.298	335.587	310.834	326.573	777.465	802.116	777.721	785.767	2.4061	2.24317e-06	1.2667	5.64914										ZNF506
sp|Q8WUM9|S20A1_HUMAN	SLC20A1	S20A1_HUMAN Sodium-dependent phosphate transporter 1	4	67.9389	77.826	70.4988	72.0879	178.686	170.046	170.865	173.199	2.40261	1.52026e-05	1.2646	4.81808
sp|P45844|ABCG1_HUMAN	ABCG1	ABCG1_HUMAN ATP-binding cassette sub-family G member 1	1	5.90971	7.16987	6.04496	6.37485	16.3333	15.3563	14.2359	15.3085	2.40139	0.00025021	1.26387	3.6017		ATL1	STX5	B3GAT3	ATP6V1C1	ACSF3	ADGRF5	EHBP1L1	HSD17B4	AKAP17A	ADH5	CCPG1	C12ORF66	VPS37B
tr|H0YNA2|H0YNA2_HUMAN	SPPL2A	H0YNA2_HUMAN Signal peptide peptidase-like 2A (Fragment)	1	11.923	11.9443	14.9018	12.9231	30.6026	28.0219	34.2632	30.9626	2.39592	0.000943201	1.26058	3.0254
sp|Q99985|SEM3C_HUMAN	SEMA3C	SEM3C_HUMAN Semaphorin-3C	2	17.0232	17.3595	20.211	18.1979	45.1668	43.0769	42.5057	43.5831	2.39496	3.99287e-05	1.26	4.39872										ZSWIM7
sp|Q8N1F8|S11IP_HUMAN	STK11IP	S11IP_HUMAN Serine/threonine-protein kinase 11-interacting protein	8	122.573	118.922	123.496	121.663	282.267	301.893	289.713	291.291	2.39424	8.64266e-06	1.25957	5.06335
sp|A4D1P6|WDR91_HUMAN	WDR91	WDR91_HUMAN WD repeat-containing protein 91	4	93.5385	88.5986	81.0253	87.7208	205.585	206.48	217.813	209.959	2.3935	2.18937e-05	1.25912	4.65968
sp|Q96IU4|ABHEB_HUMAN	ABHD14B	ABHEB_HUMAN Alpha/beta hydrolase domain-containing protein 14B	1	10.6007	8.12913	10.2441	9.65796	20.105	24.3634	24.6222	23.0302	2.38458	0.00127535	1.25374	2.89437		ATP13A1	TMED10	B3GNT5	ATP6V1E2	ACSM3	ADGRG6	EHD4	LACC1	ALKBH2	AFAP1L2	FKBP8	DEPTOR	VPS4B
sp|P40123|CAP2_HUMAN	CAP2	CAP2_HUMAN Adenylyl cyclase-associated protein 2	1	36.3315	32.9063	28.8886	32.7088	77.7657	84.6628	71.166	77.8648	2.38054	0.000531368	1.25129	3.2746		SRD5A1				MSRB2	GABBR2			EGR4	LIMS3
sp|O75379|VAMP4_HUMAN	VAMP4	VAMP4_HUMAN Vesicle-associated membrane protein 4	1	10.8298	11.1962	16.7634	12.9298	24.9412	36.1821	31.2098	30.7777	2.38037	0.00913055	1.25118	2.0395
sp|P11166|GTR1_HUMAN	SLC2A1	GTR1_HUMAN Solute carrier family 2, facilitated glucose transporter member 1	13	321.656	390.315	322.658	344.876	884.306	767.619	808.122	820.016	2.37771	0.000318709	1.24957	3.49661
sp|P15289|ARSA_HUMAN	ARSA	ARSA_HUMAN Arylsulfatase A	8	124.572	155.363	130.182	136.706	316.222	323.685	330.34	323.416	2.36578	5.46434e-05	1.24232	4.26246		KCNRG		RHOBTB3		FDX2	CHRNA10			CHD1L	DPYSL5
sp|P10599|THIO_HUMAN	TXN	THIO_HUMAN Thioredoxin	8	282.011	191.698	202.351	225.353	535.019	493.567	560.436	529.674	2.35042	0.000913756	1.23292	3.03917
sp|P11047|LAMC1_HUMAN	LAMC1	LAMC1_HUMAN Laminin subunit gamma-1	20	434.65	550.851	480.142	488.548	1180.45	1094.77	1164.02	1146.42	2.34658	0.000104549	1.23056	3.98068							SLC6A2			RAD51B
sp|Q14031|CO4A6_HUMAN	COL4A6	CO4A6_HUMAN Collagen alpha-6(IV) chain	1	15.3439	21.6718	16.6463	17.8873	49.0481	19.2643	57.5976	41.97	2.34636	0.110331	1.23042	0.957302						SLC25A28	ITGB2			GRHL3	PYDC1
sp|P17050|NAGAB_HUMAN	NAGA	NAGAB_HUMAN Alpha-N-acetylgalactosaminidase	9	233.059	275.077	242.642	250.259	544.57	629.427	585.944	586.647	2.34416	0.000260165	1.22907	3.58475										SUPT20H
sp|P48739-2|PIPNB_HUMAN	PITPNB	PIPNB_HUMAN Isoform 2 of Phosphatidylinositol transfer protein beta isoform	1	44.6616	32.6113	31.2434	36.1721	83.5074	87.3953	83.3726	84.7585	2.3432	0.000403984	1.22848	3.39364										ZC3H18
sp|Q9UNE7|CHIP_HUMAN	STUB1	CHIP_HUMAN E3 ubiquitin-protein ligase CHIP	3	66.0668	68.2107	71.9436	68.7404	149.185	171.54	158.617	159.781	2.32441	0.000170111	1.21686	3.76927
sp|Q9NQ34|TMM9B_HUMAN	TMEM9B	TMM9B_HUMAN Transmembrane protein 9B	4	229.59	231.194	216.522	225.769	512.403	542.4	518.772	524.525	2.32328	8.21514e-06	1.21616	5.08538
sp|Q0P6H9|TMM62_HUMAN	TMEM62	TMM62_HUMAN Transmembrane protein 62	2	64.4359	62.3705	67.3294	64.7119	144.875	151.082	152.634	149.53	2.31071	6.8018e-06	1.20834	5.16738
sp|P32119|PRDX2_HUMAN	PRDX2	PRDX2_HUMAN Peroxiredoxin-2	7	385.876	281.487	297.949	321.77	697.012	784.715	743.24	741.655	2.30492	0.000518722	1.20472	3.28507										ZNF205
sp|P22059|OSBP1_HUMAN	OSBP	OSBP1_HUMAN Oxysterol-binding protein 1	16	427.094	423.351	439.36	429.935	961.796	929.161	1071.86	987.606	2.2971	0.000212201	1.19982	3.67325										U2AF1
sp|Q9UBQ0-2|VPS29_HUMAN	VPS29	VPS29_HUMAN Isoform 2 of Vacuolar protein sorting-associated protein 29	2	89.787	83.6146	82.8053	85.4023	177.878	223.301	187.219	196.133	2.29657	0.00139135	1.19948	2.85656
sp|P05067|A4_HUMAN	APP	A4_HUMAN Amyloid beta A4 protein	23	854.083	899.808	900.544	884.812	1999.39	2098.18	1977.22	2024.93	2.28854	9.22435e-06	1.19443	5.03506		G6PC2		JAKMIP2		DBT	CD86			CD3EAP	CRACR2A
sp|P17301|ITA2_HUMAN	ITGA2	ITA2_HUMAN Integrin alpha-2	25	677.152	749.659	636.853	687.888	1621.98	1502.48	1597.39	1573.95	2.28809	5.57018e-05	1.19414	4.25413							SLC16A4			PPIG
sp|P56749|CLD12_HUMAN	CLDN12	CLD12_HUMAN Claudin-12	1	10.9707	10.2426	9.61443	10.2759	23.5659	25.0782	21.8918	23.512	2.28806	0.000188426	1.19413	3.72486						PTPMT1	HCN1			FOXP4	PGM2
sp|P67775|PP2AA_HUMAN	PPP2CA	PP2AA_HUMAN Serine/threonine-protein phosphatase 2A catalytic subunit alpha isoform	1	29.1701	23.8802	24.2362	25.7622	57.3177	63.379	55.2768	58.6578	2.2769	0.000378943	1.18707	3.42143										ZNF16
sp|P25788|PSA3_HUMAN	PSMA3	PSA3_HUMAN Proteasome subunit alpha type-3	7	120.765	114.822	108.171	114.586	263.98	270.751	247.263	260.665	2.27484	4.96065e-05	1.18576	4.30446										ZNF277
sp|P04080|CYTB_HUMAN	CSTB	CYTB_HUMAN Cystatin-B	1	14.2072	12.071	17.6129	14.6304	29.9349	39.4916	30.3785	33.2683	2.27392	0.0060311	1.18518	2.2196						TMEM70	LHCGR			HES2	SIKE1
sp|Q5W0Z9|ZDH20_HUMAN	ZDHHC20	ZDH20_HUMAN Probable palmitoyltransferase ZDHHC20	2	15.3865	14.875	18.2359	16.1658	34.5578	38.8612	36.597	36.672	2.26849	0.000226549	1.18173	3.64484
sp|Q9UIJ5|ZDHC2_HUMAN	ZDHHC2	ZDHC2_HUMAN Palmitoyltransferase ZDHHC2	1	59.2728	56.3707	54.8449	56.8295	125.358	128.64	132.391	128.797	2.26637	7.50383e-06	1.18038	5.12472
sp|P09972|ALDOC_HUMAN	ALDOC	ALDOC_HUMAN Fructose-bisphosphate aldolase C	2	31.7924	28.4481	27.8232	29.3546	69.0879	66.4134	64.0477	66.5163	2.26596	4.09144e-05	1.18012	4.38812		DUOXA2		GBF1	SCARB2	COQ10A	CALCRL	VPS41		BRDT	CARD10
sp|Q9UHG3|PCYOX_HUMAN	PCYOX1	PCYOX_HUMAN Prenylcysteine oxidase 1	36	924.497	1127.2	1052.97	1034.89	2421.54	2227.96	2383.74	2344.41	2.26538	9.77256e-05	1.17975	4.00999										VSX1
sp|P07355-2|ANXA2_HUMAN	ANXA2	ANXA2_HUMAN Isoform 2 of Annexin A2	46	1727.21	1368.89	1395.29	1497.13	3365.63	3602.94	3188.95	3385.84	2.26156	0.000343236	1.17732	3.46441		ERO1B		GOLGA8A	TMEM63A	COX7A2	CD200			CBFB	CDC37L1
sp|P11234|RALB_HUMAN	RALB	RALB_HUMAN Ras-related protein Ral-B	6	125.112	148.258	137.564	136.978	307.988	312.719	307.607	309.438	2.25903	1.50992e-05	1.1757	4.82104										ZNF525
sp|Q5T3U5|MRP7_HUMAN	ABCC10	MRP7_HUMAN Multidrug resistance-associated protein 7	3	37.0253	35.9693	38.8476	37.2807	77.6327	91.0737	83.3884	84.0316	2.25402	0.000301402	1.1725	3.52085		ALG8	NAT8B	B3GALNT2	ATP6V0C	ACAT1	ADCY9	CLCN4	EPHX2	AEN	ACOT7L	ATG9A	ATP6V1E2	STAM
sp|O75083|WDR1_HUMAN	WDR1	WDR1_HUMAN WD repeat-containing protein 1	6	139.659	112.097	108.147	119.968	278.185	261.189	271.326	270.233	2.25255	0.000170682	1.17156	3.76781
sp|O14495|LPP3_HUMAN	PPAP2B	LPP3_HUMAN Lipid phosphate phosphohydrolase 3	1	20.043	19.2946	17.9024	19.08	42.927	44.1929	41.7123	42.9441	2.25074	1.50316e-05	1.1704	4.82299										ZNF107
sp|O15067|PUR4_HUMAN	PFAS	PUR4_HUMAN Phosphoribosylformylglycinamidine synthase	6	97.944	71.455	84.3809	84.5933	192.39	187.734	190.83	190.318	2.2498	0.000168811	1.1698	3.7726										ZBTB1
sp|P00533|EGFR_HUMAN	EGFR	EGFR_HUMAN Epidermal growth factor receptor	28	1031.88	1300.99	1101.8	1144.89	2706.12	2503.24	2506.87	2572.08	2.24657	0.000168624	1.16772	3.77308							OR13C9			KLF9
sp|O00299|CLIC1_HUMAN	CLIC1	CLIC1_HUMAN Chloride intracellular channel protein 1	3	44.4316	33.4034	33.8997	37.2449	78.5787	96.8502	75.2456	83.5582	2.24348	0.00369886	1.16574	2.43193						PYURF	HCN4			FOXR2	PID1
sp|Q06830|PRDX1_HUMAN	PRDX1	PRDX1_HUMAN Peroxiredoxin-1	13	707.343	377.024	498.34	527.569	1290.35	901.138	1342.11	1177.87	2.23263	0.0184543	1.15874	1.7339										ZNF202
sp|Q96J84-2|KIRR1_HUMAN	KIRREL	KIRR1_HUMAN Isoform 2 of Kin of IRRE-like protein 1	2	13.6862	25.9187	18.3534	19.3194	43.1478	42.0448	44.1344	43.109	2.23138	0.0027599	1.15794	2.55911							SLC40A1			PTBP2
sp|P30508|1C12_HUMAN	HLA-C	1C12_HUMAN HLA class I histocompatibility antigen, Cw-12 alpha chain	19	479.988	585.904	536.305	534.066	1221.91	1152.23	1198.56	1190.9	2.22988	5.79915e-05	1.15696	4.23664							PEAR1			PAX4
sp|Q96BM9|ARL8A_HUMAN	ARL8A	ARL8A_HUMAN ADP-ribosylation factor-like protein 8A	5	286.46	192.385	203.911	227.585	424.832	597.212	499.988	507.344	2.22925	0.00851686	1.15656	2.06972		HSPA13		NECAB3		ETFA	CEACAM20			CENPBD1	DGKB
sp|P14618-2|KPYM_HUMAN	PKM	KPYM_HUMAN Isoform M1 of Pyruvate kinase PKM	44	1923.68	1128.83	1184.88	1412.47	2873.77	3174.35	3397.09	3148.4	2.22901	0.00430624	1.15641	2.3659										ZC3H7B
sp|P26006-1|ITA3_HUMAN	ITGA3	ITA3_HUMAN Isoform 2 of Integrin alpha-3	23	571.956	722.898	645.644	646.833	1506.04	1379.27	1440.01	1441.78	2.22898	0.000152374	1.15638	3.81709							SLC16A6			PPIL4
sp|Q9NXN4|GDAP2_HUMAN	GDAP2	GDAP2_HUMAN Ganglioside-induced differentiation-associated protein 2	3	68.9443	60.356	59.4188	62.9064	144.986	141.732	131.311	139.343	2.21509	0.000117112	1.14736	3.9314							OR5M3			NDN
sp|Q8NB49|AT11C_HUMAN	ATP11C	AT11C_HUMAN Probable phospholipid-transporting ATPase IG	7	149.793	183.199	178.924	170.639	379.994	378.118	374.519	377.544	2.21253	4.08915e-05	1.1457	4.38837		LSS		SLC35B3		GFM1	CLDN1			CLASRP	EFHB
sp|Q9BU76|MMTA2_HUMAN	MMTAG2	MMTA2_HUMAN Multiple myeloma tumor-associated protein 2	2	29.742	20.0872	23.3467	24.392	50.0378	50.9679	60.2277	53.7445	2.20337	0.00244045	1.13971	2.61253							TRBV24-1			SGF29
sp|O75369-8|FLNB_HUMAN	FLNB	FLNB_HUMAN Isoform 8 of Filamin-B	99	3980.13	2992.59	2883.55	3285.43	7334.16	7352.39	7024.78	7237.11	2.20279	0.000411252	1.13933	3.38589							OR52B6			MSH2
sp|Q8IVT2|MISP_HUMAN	MISP	MISP_HUMAN Mitotic interactor and substrate of PLK1	8	201.139	234.474	234.022	223.212	483.816	498.107	491.901	491.275	2.20093	2.2144e-05	1.13812	4.65474							TRBV11-1			SF1
sp|P12814-3|ACTN1_HUMAN	ACTN1	ACTN1_HUMAN Isoform 3 of Alpha-actinin-1	48	1867.55	1633.54	2015.04	1838.71	3900.73	4165.52	4072.55	4046.27	2.2006	8.29955e-05	1.1379	4.08095		CYP19A1		CHSY3	GAA	ATP5F1E	APCDD1	RABEP1		ASCL4	APRT	VAMP8	SZT2
sp|Q9Y6N5|SQRD_HUMAN	SQRDL	SQRD_HUMAN Sulfide:quinone oxidoreductase, mitochondrial	31	807.706	950.141	907.442	888.43	1932.13	1901.1	2026.81	1953.35	2.19865	4.71926e-05	1.13662	4.32613
sp|Q709C8|VP13C_HUMAN	VPS13C	VP13C_HUMAN Vacuolar protein sorting-associated protein 13C	29	695.178	710.396	537.199	647.591	1468.88	1312.45	1433.23	1404.85	2.16935	0.000483529	1.11726	3.31558
sp|P35241-5|RADI_HUMAN	RDX	RADI_HUMAN Isoform 5 of Radixin	24	778.013	702.836	738.266	739.705	1552.18	1683.33	1574.4	1603.3	2.16749	4.7296e-05	1.11603	4.32518										ZNF581
sp|Q9UPY5|XCT_HUMAN	SLC7A11	XCT_HUMAN Cystine/glutamate transporter	8	328.23	386.629	351.551	355.47	763.373	768.813	778.53	770.239	2.16682	1.89674e-05	1.11558	4.72199
sp|O75581|LRP6_HUMAN	LRP6	LRP6_HUMAN Low-density lipoprotein receptor-related protein 6	2	25.2263	32.622	29.8206	29.223	64.9312	63.9642	60.7267	63.2074	2.16294	0.000170273	1.11299	3.76885							TBC1D3E			RFX5
sp|O15230|LAMA5_HUMAN	LAMA5	LAMA5_HUMAN Laminin subunit alpha-5	22	467.922	618.505	528.04	538.156	1147.43	1144.86	1198.17	1163.49	2.16199	0.000185699	1.11236	3.73119							SLC5A8			RAD21L1
sp|P15311|EZRI_HUMAN	EZR	EZRI_HUMAN Ezrin	20	587.505	517.072	537.411	547.329	1230.93	1186.95	1124.11	1180.66	2.15713	7.13044e-05	1.10911	4.14688							OR3A3			MED11
sp|Q8WYP5-2|ELYS_HUMAN	AHCTF1	ELYS_HUMAN Isoform 2 of Protein ELYS	6	138.694	113.347	161.983	138.008	348.13	262.727	280.939	297.265	2.15398	0.00571465	1.107	2.24301		CYP4F8		FKTN	LAPTM5	C10orf67	AXL	SNX2		BARHL1	AZI2
sp|Q68CQ7|GL8D1_HUMAN	GLT8D1	GL8D1_HUMAN Glycosyltransferase 8 domain-containing protein 1	6	115.954	136.124	125.491	125.856	285.274	255.238	272.738	271.084	2.15391	0.000157114	1.10696	3.80379							OR6Y1			NIFK
sp|Q9ULQ1-3|TPC1_HUMAN	TPCN1	TPC1_HUMAN Isoform 3 of Two pore calcium channel protein 1	11	247.378	314.987	264.33	275.565	564.056	600.241	614.079	592.792	2.15119	0.000229086	1.10513	3.64
sp|Q6ZRP7|QSOX2_HUMAN	QSOX2	QSOX2_HUMAN Sulfhydryl oxidase 2	23	908.868	982.207	904.135	931.737	2039.45	1962.8	1994.24	1998.83	2.14527	5.90628e-06	1.10116	5.22869										ZNF442
sp|Q99747|SNAG_HUMAN	NAPG	SNAG_HUMAN Gamma-soluble NSF attachment protein	11	421.971	395.837	395.831	404.546	829.963	932.461	840.35	867.591	2.1446	0.000162899	1.10071	3.78808										SUV39H1
sp|Q08722|CD47_HUMAN	CD47	CD47_HUMAN Leukocyte surface antigen CD47	4	159.545	173.8	149.019	160.788	347.337	343.679	341.871	344.296	2.14131	1.53458e-05	1.09849	4.81401		TXNDC11				NDUFB4	GPR101			ETV3	NBPF5P
sp|Q9Y281|COF2_HUMAN	CFL2	COF2_HUMAN Cofilin-2	4	116.402	87.1625	97.6612	100.409	203.999	234.87	205.684	214.851	2.13977	0.000966665	1.09746	3.01472						PCK2	GPR63			FHL5	NUDT4B
sp|Q96J02|ITCH_HUMAN	ITCH	ITCH_HUMAN E3 ubiquitin-protein ligase Itchy homolog	2	60.0539	51.3011	51.9536	54.4362	106.157	125.216	117.667	116.347	2.1373	0.000570625	1.09579	3.24365							SLC16A10			PPAN
sp|Q01459|DIAC_HUMAN	CTBS	DIAC_HUMAN Di-N-acetylchitobiase	3	86.3923	79.1674	82.1087	82.5561	163.147	184.661	181.017	176.275	2.13522	0.000177073	1.09438	3.75185						TOMM5	LIME1			HEXIM2	SPATA5L1
sp|P10114|RAP2A_HUMAN	RAP2A	RAP2A_HUMAN Ras-related protein Rap-2a	1	41.4105	38.5209	33.9329	37.9548	72.9336	87.9615	82.1832	81.0261	2.13481	0.000915343	1.09411	3.03842										ZNF541
sp|Q6WCQ1-2|MPRIP_HUMAN	MPRIP	MPRIP_HUMAN Isoform 2 of Myosin phosphatase Rho-interacting protein	3	63.8005	56.0475	56.4444	58.7642	129.099	127.767	119.419	125.428	2.13444	7.16063e-05	1.09385	4.14505							TRBV5-8			SIX3
sp|P63000-2|RAC1_HUMAN	RAC1	RAC1_HUMAN Isoform B of Ras-related C3 botulinum toxin substrate 1	8	334.121	313.137	277.218	308.159	476.631	788.852	705.448	656.977	2.13194	0.0212125	1.09217	1.67341										ZNF514
sp|Q9H8J5|MANS1_HUMAN	MANSC1	MANS1_HUMAN MANSC domain-containing protein 1	2	47.3015	54.8698	48.6545	50.2753	107.813	106.028	106.627	106.823	2.12476	1.88754e-05	1.0873	4.7241							TMPRSS6			RPAP1
sp|Q8NCG7|DGLB_HUMAN	DAGLB	DGLB_HUMAN Sn1-specific diacylglycerol lipase beta	5	128.627	120.062	112.86	120.516	258.019	270.563	239.309	255.963	2.12389	0.000183032	1.08671	3.73747						YME1L1	LYPD6B			HMGXB3	TARS1
sp|O14734|ACOT8_HUMAN	ACOT8	ACOT8_HUMAN Acyl-coenzyme A thioesterase 8	4	101.731	121.963	107.685	110.46	229.763	222.995	249.295	234.018	2.11858	0.000237949	1.0831	3.62352		CLGN		CHST11	CTSL	APOO	ALPP	RAB12	PXT1	ARID5A	ALDH9A1	SQSTM1	RICTOR
sp|Q9NZD8|SPG21_HUMAN	SPG21	SPG21_HUMAN Maspardin	2	46.3066	41.3112	44.2663	43.9613	95.0622	98.7759	85.4244	93.0875	2.11749	0.000315486	1.08235	3.50102
sp|Q8N3V7|SYNPO_HUMAN	SYNPO	SYNPO_HUMAN Synaptopodin	2	44.7045	54.1854	61.1859	53.3586	111.301	111.408	115.499	112.736	2.1128	0.0002816	1.07916	3.55037
sp|O00194|RB27B_HUMAN	RAB27B	RB27B_HUMAN Ras-related protein Rab-27B	4	100.783	113.707	107.397	107.296	238.044	194.536	244.484	225.688	2.10342	0.00183175	1.07274	2.73713										ZNF479
sp|O96011|PX11B_HUMAN	PEX11B	PX11B_HUMAN Peroxisomal membrane protein 11B	1	32.5329	38.2165	36.4504	35.7333	59.3892	88.2885	77.5117	75.0631	2.10065	0.0102253	1.07084	1.99033										YPEL3
sp|Q9UHX3|EMR2_HUMAN	EMR2	EMR2_HUMAN EGF-like module-containing mucin-like hormone receptor-like 2	1	10.601	11.525	13.2037	11.7766	23.6971	25.0677	25.4477	24.7375	2.10056	0.000153068	1.07078	3.81512							OR2AK2			LSM10
sp|Q13740|CD166_HUMAN	ALCAM	CD166_HUMAN CD166 antigen	14	312.351	430.289	363.792	368.811	843.68	738.303	740.219	774.067	2.09882	0.00114438	1.06958	2.94143		DIPK1A		GALNT15	OSTM1	CLPB	CA12	VPS11		BHLHE22	C11orf21
sp|Q06418|TYRO3_HUMAN	TYRO3	TYRO3_HUMAN Tyrosine-protein kinase receptor TYRO3	1	12.9481	17.6672	16.7734	15.7962	33.4835	33.419	32.4726	33.125	2.09702	0.00030725	1.06834	3.51251
sp|O75312|ZPR1_HUMAN	ZNF259	ZPR1_HUMAN Zinc finger protein ZPR1	2	42.7407	40.3234	35.1419	39.402	83.6616	89.6109	73.5699	82.2808	2.08824	0.00117167	1.06229	2.93119
sp|Q9HC38|GLOD4_HUMAN	GLOD4	GLOD4_HUMAN Glyoxalase domain-containing protein 4	1	56.7493	58.0669	60.805	58.5404	115.267	133.942	117.508	122.239	2.08811	0.000447647	1.0622	3.34906							OR6Q1			NHEJ1
sp|Q9H5V8|CDCP1_HUMAN	CDCP1	CDCP1_HUMAN CUB domain-containing protein 1	13	368.261	442.661	381.424	397.448	870.396	807.412	811.586	829.798	2.08781	0.000146462	1.06199	3.83427		USP19				NOA1	GPR179			FAM53B	NLRP14
sp|Q56VL3|OCAD2_HUMAN	OCIAD2	OCAD2_HUMAN OCIA domain-containing protein 2	4	254.603	294.52	312.772	287.298	552.776	642.104	602.74	599.207	2.08566	0.000551125	1.0605	3.25875										TSHZ1
sp|P31153|METK2_HUMAN	MAT2A	METK2_HUMAN S-adenosylmethionine synthase isoform type-2	4	199.736	162.048	182.289	181.358	358.184	394.577	379.73	377.497	2.08151	0.000206529	1.05763	3.68502							TRAV12-2			RRP9
sp|Q9H1C7|CYTM1_HUMAN	CYSTM1	CYTM1_HUMAN Cysteine-rich and transmembrane domain-containing protein 1	2	47.8138	45.683	52.3648	48.6205	99.6688	98.4459	104.628	100.914	2.07555	4.38065e-05	1.05349	4.35846						VDAC3	LYPD2			HMGB4	TAGLN
sp|P36952|SPB5_HUMAN	SERPINB5	SPB5_HUMAN Serpin B5	11	436.565	313.153	317.028	355.582	632.875	875.307	704.258	737.48	2.07401	0.00983478	1.05242	2.00724
sp|Q5T8D3|ACBD5_HUMAN	ACBD5	ACBD5_HUMAN Acyl-CoA-binding domain-containing protein 5	3	56.1911	80.8829	64.6478	67.2406	139.524	134.227	144.502	139.418	2.07342	0.000769077	1.05201	3.11403		CERS2		BICD1	CTBS	ALDH1B1	AJAP1	PIKFYVE	PEX26	ARGLU1	AKR1E2	NIPSNAP2	PRKAA2
sp|Q9UQ53-3|MGT4B_HUMAN	MGAT4B	MGT4B_HUMAN Isoform 3 of Alpha-1,3-mannosyl-glycoprotein 4-beta-N-acetylglucosaminyltransferase B	3	101.768	101.257	103.086	102.037	225.632	167.942	240.805	211.46	2.07238	0.00788131	1.05129	2.1034							TRBJ1-6			SENP6
sp|P16949-2|STMN1_HUMAN	STMN1	STMN1_HUMAN Isoform 2 of Stathmin	11	522.281	301.753	406.631	410.222	713.616	1001.22	827.226	847.355	2.0656	0.0141636	1.04656	1.84883
sp|Q9Y3L5|RAP2C_HUMAN	RAP2C	RAP2C_HUMAN Ras-related protein Rap-2c	2	47.5824	57.1857	49.2746	51.3476	106.482	103.455	108.028	105.989	2.06414	7.33663e-05	1.04554	4.1345										ZNF543
sp|Q8WWI1-3|LMO7_HUMAN	LMO7	LMO7_HUMAN Isoform 3 of LIM domain only protein 7	19	398.378	410.61	466.387	425.125	879.31	890.667	860.336	876.771	2.06238	3.78098e-05	1.04431	4.4224							TAAR5			RCOR2
sp|P47756-2|CAPZB_HUMAN	CAPZB	CAPZB_HUMAN Isoform 2 of F-actin-capping protein subunit beta	10	482.535	458.318	437.393	459.415	824.345	1059.64	956.225	946.735	2.06074	0.00215797	1.04316	2.66595		STIM2				MT-ND3	GABRG3			ELF4	LRTOMT
sp|O15144|ARPC2_HUMAN	ARPC2	ARPC2_HUMAN Actin-related protein 2/3 complex subunit 2	7	254.144	211.841	220.721	228.902	445.78	514.117	454.965	471.621	2.06036	0.000628848	1.0429	3.20145		ITPR2		PXYLP1		FASTK	CHRM1			CENPS	DOCK3
sp|Q9H2H9|S38A1_HUMAN	SLC38A1	S38A1_HUMAN Sodium-coupled neutral amino acid transporter 1	6	503.874	603.348	538.903	548.708	1183.06	1088.91	1104.05	1125.34	2.05089	0.000151743	1.03625	3.81889
sp|Q15819|UB2V2_HUMAN	UBE2V2	UB2V2_HUMAN Ubiquitin-conjugating enzyme E2 variant 2	3	53.6274	37.0962	33.855	41.5262	87.2141	89.2297	79.0086	85.1508	2.05053	0.00315827	1.036	2.50055
sp|Q8N668|COMD1_HUMAN	COMMD1	COMD1_HUMAN COMM domain-containing protein 1	1	40.5015	29.5424	32.972	34.3386	61.8475	87.0999	61.8179	70.2551	2.04595	0.0163929	1.03277	1.78534						SLC25A31	IZUMO1R			GSX1	RARS1
sp|Q96PY5-3|FMNL2_HUMAN	FMNL2	FMNL2_HUMAN Isoform 2 of Formin-like protein 2	1	8.1036	11.2849	10.2884	9.8923	20.9129	18.9963	20.7549	20.2214	2.04415	0.000774701	1.0315	3.11087							OR52E5			MSX1
sp|P55290-4|CAD13_HUMAN	CDH13	CAD13_HUMAN Isoform 4 of Cadherin-13	14	581.489	568.34	553.168	567.666	1237.53	1090.43	1151.83	1159.93	2.04333	0.000167479	1.03092	3.77604		VAPB				NSUN3	GPR182			FAM71B	NLRP2
sp|P53990-5|IST1_HUMAN	IST1	IST1_HUMAN Isoform 5 of IST1 homolog	8	273.792	268.547	235.811	259.383	550.895	535.314	493.161	526.457	2.02965	0.000217846	1.02123	3.66185							SLC15A2			POU6F1
sp|Q969X1|LFG3_HUMAN	TMBIM1	LFG3_HUMAN Protein lifeguard 3	2	34.5868	36.2996	35.7994	35.5619	69.5156	78.9474	67.4951	71.986	2.02424	0.000517495	1.01738	3.28609
sp|Q9UJ83|HACL1_HUMAN	HACL1	HACL1_HUMAN 2-hydroxyacyl-CoA lyase 1	9	251.851	299.522	314.353	288.576	612.762	563.683	567.098	581.181	2.01396	0.000286731	1.01004	3.54253							PCDHA7			NUP50
sp|Q969T9|WBP2_HUMAN	WBP2	WBP2_HUMAN WW domain-binding protein 2	2	25.8018	26.8981	23.6781	25.4593	51.2099	49.4219	53.1164	51.2494	2.01299	5.48347e-05	1.00934	4.26094
sp|Q14847|LASP1_HUMAN	LASP1	LASP1_HUMAN LIM and SH3 domain protein 1	5	156.659	118.576	114.953	130.062	265.034	274.589	244.955	261.526	2.01077	0.00117985	1.00775	2.92817							SLCO1B3			RBBP7
sp|Q96T17-2|MA7D2_HUMAN	MAP7D2	MA7D2_HUMAN Isoform 2 of MAP7 domain-containing protein 2	1	11.0588	6.28559	6.04421	7.79619	14.6398	17.1767	15.1723	15.6629	2.00905	0.0121065	1.00651	1.91698							TRABD2A			RPRD1B
sp|Q9H4G0|E41L1_HUMAN	EPB41L1	E41L1_HUMAN Band 4.1-like protein 1	6	129.219	124.902	135.801	129.974	264.64	268.402	249.942	260.995	2.00806	3.49386e-05	1.0058	4.45669							OR2C1			LTO1
sp|Q6QNY1|BL1S2_HUMAN	BLOC1S2	BL1S2_HUMAN Biogenesis of lysosome-related organelles complex 1 subunit 2	1	20.1282	17.0322	19.7567	18.9724	33.6212	46.2896	34.2341	38.0483	2.00546	0.0108159	1.00393	1.96594		RCE1				MMAB	DSC2			DHX8	GSTT1
sp|P54802|ANAG_HUMAN	NAGLU	ANAG_HUMAN Alpha-N-acetylglucosaminidase	18	458.821	527.666	487.962	491.483	927.986	1057.29	967.067	984.116	2.00234	0.000336577	1.00169	3.47292										SUPT3H
sp|O15145|ARPC3_HUMAN	ARPC3	ARPC3_HUMAN Actin-related protein 2/3 complex subunit 3	2	60.3211	49.7004	44.8886	51.6367	99.1192	113.507	97.3656	103.331	2.00111	0.00165234	1.0008	2.7819		ITPR3		QPCTL		FASTKD1	CHRM2			CENPT	DPP3
sp|Q7KYR7-1|BT2A1_HUMAN	BTN2A1	BT2A1_HUMAN Isoform 2 of Butyrophilin subfamily 2 member A1	3	53.4136	69.2768	61.2094	61.2999	111.232	133.55	123.155	122.646	2.00075	0.00148855	1.00054	2.82724		RNF26				MRPL20	ENPP6			DNAJC27	HNMT
sp|Q9H0E2|TOLIP_HUMAN	TOLLIP	TOLIP_HUMAN Toll-interacting protein	1	17.8532	18.3428	17.007	17.7344	33.47	37.9951	34.9646	35.4766	2.00044	0.00021533	1.00032	3.6669
sp|Q8WXH0-2|SYNE2_HUMAN	SYNE2	SYNE2_HUMAN Isoform 2 of Nesprin-2	22	478.242	567.268	569.668	538.393	1215.47	958.543	1055.03	1076.35	1.99919	0.00263664	0.999414	2.57895
sp|Q14914|PTGR1_HUMAN	PTGR1	PTGR1_HUMAN Prostaglandin reductase 1	4	121.981	91.7106	90.4101	101.367	184.259	226.237	196.952	202.482	1.99752	0.00332071	0.998207	2.47877										ZNF35
sp|Q5M775|CYTSB_HUMAN	SPECC1	CYTSB_HUMAN Cytospin-B	23	820.519	992.706	946.145	919.79	1865.84	1801.79	1842.95	1836.86	1.99704	7.43451e-05	0.997865	4.12875
sp|O43707|ACTN4_HUMAN	ACTN4	ACTN4_HUMAN Alpha-actinin-4	62	2042.5	2084.48	2236.04	2121	4238.24	4099.01	4364.74	4234	1.99622	2.59147e-05	0.997273	4.58645		CYP1A2		COG1	GALC	ATP5F1EP2	APLNR	RABEPK		ASCL5	ARAP2	VAPA	TBC1D7
sp|O75874|IDHC_HUMAN	IDH1	IDHC_HUMAN Isocitrate dehydrogenase [NADP] cytoplasmic	3	88.8284	67.7551	64.324	73.6358	144.294	141.505	155.046	146.948	1.99561	0.00108686	0.99683	2.96383							RTP1			POLD1
sp|P61221|ABCE1_HUMAN	ABCE1	ABCE1_HUMAN ATP-binding cassette sub-family E member 1	3	153.455	138.535	137.824	143.272	261.533	297.337	298.278	285.716	1.99423	0.000408956	0.995829	3.38832		ARMC10	RAB6B	B3GALT6	ATP6V1A	ACOT9	ADGRD1	DENND6B	HACL1	AHNAK	ADH1B	BNIP3L	ATP6V1H	VPS28
sp|Q9UBI1|COMD3_HUMAN	COMMD3	COMD3_HUMAN COMM domain-containing protein 3	4	316.004	239.064	227.702	260.924	450.884	631.779	476.677	519.78	1.99208	0.014694	0.994274	1.83286						SLC25A34	JAML			GTF2A1L	RBP2
sp|Q86VR2|F134C_HUMAN	FAM134C	F134C_HUMAN Protein FAM134C	2	84.5822	86.3424	77.9633	82.9626	177.223	180.149	137.99	165.121	1.9903	0.00402566	0.992988	2.39516							OR4D1			MED30
sp|Q9UBR2|CATZ_HUMAN	CTSZ	CATZ_HUMAN Cathepsin Z	10	206.837	237.103	207.141	217.027	465.783	369.016	451.643	428.814	1.97586	0.00264103	0.982478	2.57823						TST	LRRC32			HIST1H2BD	SRMS
sp|P49790|NU153_HUMAN	NUP153	NU153_HUMAN Nuclear pore complex protein Nup153	9	207.997	211.928	229.032	216.319	527.288	321.115	431.8	426.734	1.97271	0.0246358	0.980177	1.60843										TP63
sp|Q9Y6M4-2|KC1G3_HUMAN	CSNK1G3	KC1G3_HUMAN Isoform 2 of Casein kinase I isoform gamma-3	2	72.8058	82.8507	75.3456	77.0007	157.326	149.526	148.024	151.625	1.96914	5.74207e-05	0.977566	4.24093						TMEM126A	LCT			HELZ	SHMT1
sp|Q86Y82|STX12_HUMAN	STX12	STX12_HUMAN Syntaxin-12	12	364.158	336.405	356.499	352.354	625.953	756.361	696	692.772	1.96612	0.000910276	0.975353	3.04083
sp|O43776|SYNC_HUMAN	NARS	SYNC_HUMAN Asparagine--tRNA ligase, cytoplasmic	4	123.545	86.7848	94.7716	101.7	198.029	207.676	194.027	199.911	1.96568	0.00116651	0.975031	2.93311										SUV39H2
sp|O75976|CBPD_HUMAN	CPD	CBPD_HUMAN Carboxypeptidase D	29	797.227	884.373	897.842	859.814	1584.13	1918.46	1554.9	1685.83	1.96069	0.00239379	0.971364	2.62091						SUOX	KCTD3			H2AFV	S100A14
sp|P16144|ITB4_HUMAN	ITGB4	ITB4_HUMAN Integrin beta-4	33	1022.99	1215.04	1224.75	1154.26	2310.32	2122.6	2327.03	2253.31	1.95217	0.00029094	0.965079	3.5362							SLC19A1			PPP2R5C
sp|P09960|LKHA4_HUMAN	LTA4H	LKHA4_HUMAN Leukotriene A-4 hydrolase	1	8.67211	8.16785	7.25962	8.03319	15.4244	14.939	16.6817	15.6817	1.95211	0.000323642	0.965036	3.48994							TIGIT			RLIM
sp|Q9NV96|CC50A_HUMAN	TMEM30A	CC50A_HUMAN Cell cycle control protein 50A	6	229.84	241.913	249.528	240.427	438.345	496.21	472.296	468.95	1.95049	0.000209377	0.963836	3.67907
sp|Q96FL8-3|S47A1_HUMAN	SLC47A1	S47A1_HUMAN Isoform 3 of Multidrug and toxin extrusion protein 1	1	18.3864	22.7741	22.1339	21.0981	38.6175	42.3974	42.273	41.0959	1.94785	0.000412413	0.961881	3.38467
sp|Q16864-2|VATF_HUMAN	ATP6V1F	VATF_HUMAN Isoform 2 of V-type proton ATPase subunit F	3	271.232	173.179	196.866	213.759	295.915	516.022	436.358	416.098	1.94658	0.0460244	0.960938	1.33701		P3H4		TM9SF4		HTD2	CNIH3			CTCF	FBXL15
sp|O43795|MYO1B_HUMAN	MYO1B	MYO1B_HUMAN Unconventional myosin-Ib	3	54.6693	42.569	47.5329	48.2571	86.7246	95.41	99.1627	93.7658	1.94305	0.000865009	0.958321	3.06298										SUB1
sp|Q9NS00|C1GLT_HUMAN	C1GALT1	C1GLT_HUMAN Glycoprotein-N-acetylgalactosamine 3-beta-galactosyltransferase 1	3	42.5613	40.0614	43.8823	42.1683	81.8182	83.6874	80.2343	81.9133	1.94253	1.20701e-05	0.957937	4.91829		SEC62				MRPL48	F2R			DUSP5	ILKAP
sp|P63104|1433Z_HUMAN	YWHAZ	1433Z_HUMAN 14-3-3 protein zeta/delta	8	347.451	253.095	272.847	291.131	615.421	563.156	513.817	564.132	1.93772	0.00265708	0.954364	2.5756
sp|Q9NRX4|PHP14_HUMAN	PHPT1	PHP14_HUMAN 14 kDa phosphohistidine phosphatase	1	10.0301	8.48555	10.8411	9.7856	22.6251	12.2085	21.9568	18.9301	1.93449	0.056332	0.951954	1.24925										ZBTB43
sp|Q9UQN3|CHM2B_HUMAN	CHMP2B	CHM2B_HUMAN Charged multivesicular body protein 2b	4	151.664	100.189	98.8716	116.908	210.964	259.255	208.2	226.14	1.93433	0.0104363	0.951836	1.98146						PET100	GRID2IP			FOXD2	PAIP2
sp|P80723|BASP1_HUMAN	BASP1	BASP1_HUMAN Brain acid soluble protein 1	53	2564.58	3047.83	2643.7	2752.04	5487.66	5360.91	5107.69	5318.76	1.93266	0.000162329	0.95059	3.7896		PIGZ		USP32		MCCC1	CXCR6			DDX18	GNAT3
sp|Q9UQ80|PA2G4_HUMAN	PA2G4	PA2G4_HUMAN Proliferation-associated protein 2G4	4	60.9827	36.9957	47.4469	48.4751	87.1837	95.412	97.7687	93.4548	1.92789	0.00417913	0.947025	2.37891										UHRF2
sp|P15941-2|MUC1_HUMAN	MUC1	MUC1_HUMAN Isoform 2 of Mucin-1	4	128.977	124.107	125.121	126.068	279.632	190.265	259.135	243.011	1.92761	0.0124462	0.946812	1.90496										SSBP2
sp|Q86X83|COMD2_HUMAN	COMMD2	COMD2_HUMAN COMM domain-containing protein 2	2	30.8837	16.542	19.7275	22.3844	36.0975	51.7968	41.322	43.0721	1.9242	0.0310086	0.94426	1.50852						SLC25A33	JAM2			GTF2A1	RBMS3
sp|O14744|ANM5_HUMAN	PRMT5	ANM5_HUMAN Protein arginine N-methyltransferase 5	4	43.77	40.617	40.0673	41.4848	80.1866	79.5261	79.7449	79.8192	1.92406	5.17123e-06	0.944153	5.28641										ZNF233
sp|P28062|PSB8_HUMAN	PSMB8	PSB8_HUMAN Proteasome subunit beta type-8	5	107.468	94.6158	89.6279	97.2372	195.358	192.453	173.131	186.981	1.92293	0.000513846	0.943308	3.28917										ZNF286B
sp|P43487|RANG_HUMAN	RANBP1	RANG_HUMAN Ran-specific GTPase-activating protein	4	196.675	184.731	140.064	173.823	323.169	358.233	321.349	334.25	1.92293	0.00157635	0.943306	2.80235										ZNF528
sp|Q00653|NFKB2_HUMAN	NFKB2	NFKB2_HUMAN Nuclear factor NF-kappa-B p100 subunit	9	209.8	168.904	171.317	183.341	358.983	379.017	318.38	352.126	1.92061	0.00161097	0.941568	2.79291										TCF3
sp|P29400-2|CO4A5_HUMAN	COL4A5	CO4A5_HUMAN Isoform 2 of Collagen alpha-5(IV) chain	1	15.1279	15.6775	13.7129	14.8395	24.9152	36.0443	24.4831	28.4809	1.91927	0.0235248	0.940556	1.62847						SLC25A27	ITGAV			GRHL2	PYCR3
sp|P62070|RRAS2_HUMAN	RRAS2	RRAS2_HUMAN Ras-related protein R-Ras2	1	9.63027	12.5737	10.234	10.8127	21.4558	20.3832	20.3698	20.7363	1.91778	0.000508426	0.939435	3.29377										ZNF77
sp|P10316|1A69_HUMAN	HLA-A	1A69_HUMAN HLA class I histocompatibility antigen, A-69 alpha chain	17	533.318	681.581	624.432	613.11	1219.13	1150.7	1157.54	1175.79	1.91775	0.00031151	0.939415	3.50653							PCDHGC5			PAX1
sp|P52907|CAZA1_HUMAN	CAPZA1	CAZA1_HUMAN F-actin-capping protein subunit alpha-1	10	220.299	188.275	186.558	198.377	382.597	368.639	386.348	379.195	1.91148	0.000121577	0.934694	3.91515		SSR3				MT-ND1	GABRE			ELF1	LRRK1
sp|Q96B97|SH3K1_HUMAN	SH3KBP1	SH3K1_HUMAN SH3 domain-containing kinase-binding protein 1	5	190.014	145.698	132.239	155.984	291.189	330.858	271.65	297.899	1.9098	0.00451992	0.933425	2.34487
sp|Q15631|TSN_HUMAN	TSN	TSN_HUMAN Translin	2	42.9159	31.4237	30.5607	34.9668	63.2349	74.3624	62.565	66.7208	1.90812	0.00453479	0.932151	2.34344
sp|Q96QE2|MYCT_HUMAN	SLC2A13	MYCT_HUMAN Proton myo-inositol cotransporter	6	116.962	130.546	108.582	118.696	224.339	238.748	214.76	225.949	1.90359	0.00034555	0.92872	3.46149
sp|O75626|PRDM1_HUMAN	PRDM1	PRDM1_HUMAN PR domain zinc finger protein 1	1	55.4027	68.2666	64.7672	62.8122	115.024	120.839	122.494	119.453	1.90174	0.000221096	0.927323	3.65542										ZNF200
sp|Q96JC1|VPS39_HUMAN	VPS39	VPS39_HUMAN Vam6/Vps39-like protein	1	18.0293	13.501	16.1979	15.9094	30.3882	31.9819	28.3753	30.2485	1.9013	0.00103135	0.926984	2.9866
sp|P51659|DHB4_HUMAN	HSD17B4	DHB4_HUMAN Peroxisomal multifunctional enzyme type 2	43	1494	1886.34	1789.1	1723.14	3361.25	3110.34	3333.83	3268.47	1.89681	0.000407285	0.923573	3.3901							PTPRJ			PIAS2
sp|P18583-5|SON_HUMAN	SON	SON_HUMAN Isoform D of Protein SON	16	451.35	432.103	490.287	457.913	1049.78	701.605	852.387	867.923	1.89539	0.0159988	0.922492	1.79591
sp|Q9Y5Y5-2|PEX16_HUMAN	PEX16	PEX16_HUMAN Isoform 2 of Peroxisomal membrane protein PEX16	1	5.50483	9.70554	12.2557	9.15536	17.6066	17.5151	16.8787	17.3335	1.89326	0.0145243	0.920871	1.8379										YTHDC1
sp|Q9GZZ9|UBA5_HUMAN	UBA5	UBA5_HUMAN Ubiquitin-like modifier-activating enzyme 5	2	17.9938	18.5632	14.7796	17.1122	31.7314	30.8044	34.447	32.3276	1.88916	0.000693842	0.917743	3.15874
sp|P04003|C4BPA_HUMAN	C4BPA	C4BPA_HUMAN C4b-binding protein alpha chain	1	30.8294	40.5761	27.5396	32.9817	61.2003	65.5439	60.1183	62.2875	1.88855	0.00232073	0.917278	2.63438		SERPINH1				MRPS10	FCGR1B			DUX5	ITSN2
tr|E9PEB9|E9PEB9_HUMAN	DST	E9PEB9_HUMAN Dystonin	18	427.919	460.979	470.332	453.077	836.197	846.798	876.577	853.191	1.8831	2.24407e-05	0.913112	4.64896							OR10H1			KAT8
sp|Q68DH5|LMBD2_HUMAN	LMBRD2	LMBD2_HUMAN LMBR1 domain-containing protein 2	6	469.527	495.25	490.976	485.251	896.506	922.476	920.102	913.028	1.88156	3.10925e-06	0.911928	5.50734							SUSD3			RBMY1E
sp|Q96CV9|OPTN_HUMAN	OPTN	OPTN_HUMAN Optineurin	1	11.849	9.39831	8.53566	9.92766	18.0679	21.2493	16.5792	18.6321	1.87679	0.00685104	0.908267	2.16424										TWIST1
sp|P56589|PEX3_HUMAN	PEX3	PEX3_HUMAN Peroxisomal biogenesis factor 3	2	97.179	137.55	143.364	126.031	224.956	230.684	253.481	236.373	1.87552	0.00286488	0.907289	2.54289										YY2
sp|P48509|CD151_HUMAN	CD151	CD151_HUMAN CD151 antigen	3	280.188	265.456	384.598	310.081	587.612	528.334	626.972	580.973	1.87362	0.00456746	0.905827	2.34033		TRAM1L1				NDUFAF7	GP6			ESRP2	NBPF14
sp|P49768|PSN1_HUMAN	PSEN1	PSN1_HUMAN Presenilin-1	4	84.7418	104.996	103.529	97.7558	187.332	165.869	196.119	183.107	1.8731	0.00153936	0.905429	2.81266										ZNF267
sp|P19021-5|AMD_HUMAN	PAM	AMD_HUMAN Isoform 5 of Peptidyl-glycine alpha-amidating monooxygenase	3	56.5655	62.2704	61.6887	60.1749	108.722	119.332	109.607	112.554	1.87044	0.000169296	0.903379	3.77135										USPL1
sp|Q5JWF2|GNAS1_HUMAN	GNAS	GNAS1_HUMAN Guanine nucleotide-binding protein G(s) subunit alpha isoforms XLas	8	250.045	299.836	264.923	271.601	511.553	520.385	491.966	507.968	1.87027	0.000154377	0.903249	3.81142							OR7G3			NKX2-5
sp|Q969P0|IGSF8_HUMAN	IGSF8	IGSF8_HUMAN Immunoglobulin superfamily member 8	1	12.4841	11.9594	10.9767	11.8067	22.1185	22.2228	21.8546	22.0653	1.86888	2.29514e-05	0.90217	4.63919							SCN4B			POLR1D
sp|P07737|PROF1_HUMAN	PFN1	PROF1_HUMAN Profilin-1	9	362.395	246.713	229.662	279.59	491.39	480.477	591.943	521.27	1.86441	0.0115586	0.89872	1.93709										ZBTB18
sp|Q7L5N7|PCAT2_HUMAN	LPCAT2	PCAT2_HUMAN Lysophosphatidylcholine acyltransferase 2	5	94.9776	98.0047	104.517	99.1664	200.702	149.436	204.339	184.826	1.86379	0.0088228	0.898243	2.05439							TAS1R1			REV1
sp|Q5VYK3|ECM29_HUMAN	ECM29	ECM29_HUMAN Proteasome-associated protein ECM29 homolog	1	40.2137	30.1649	31.5747	33.9844	55.2523	71.181	62.8525	63.0952	1.85659	0.00639961	0.892657	2.19385							OR11H1			KHDRBS3
sp|Q24JP5-2|T132A_HUMAN	TMEM132A	T132A_HUMAN Isoform 2 of Transmembrane protein 132A	9	113.111	132.912	120.22	122.081	226.746	225.817	227.397	226.653	1.85658	5.59954e-05	0.89265	4.25185
sp|Q8NBX0|SCPDL_HUMAN	SCCPDH	SCPDL_HUMAN Saccharopine dehydrogenase-like oxidoreductase	3	89.421	110.464	117.341	105.742	171.836	203.017	213.18	196.011	1.85367	0.00384812	0.890385	2.41475										ZNF860
sp|P21399|ACOC_HUMAN	ACO1	ACOC_HUMAN Cytoplasmic aconitate hydratase	1	12.6961	14.0093	11.9043	12.8699	25.7518	23.5653	22.2169	23.8447	1.85275	0.000790805	0.889668	3.10193		CERS6		CERT	CTSC	ALDH5A1	ALK	PRAF2	PEX7	ARID1B	ALDH1A2	PLEKHM1	PRKAG2
sp|P61160|ARP2_HUMAN	ACTR2	ARP2_HUMAN Actin-related protein 2	8	174.391	148.218	139.279	153.963	269.302	294.28	292.127	285.236	1.85263	0.000578038	0.889577	3.23804		CYP26A1		COG3	GBA	ATP5MC1	APOLD1	RAP2A		ASF1B	ARHGAP1	VMP1	TSC1
sp|P52888|THOP1_HUMAN	THOP1	THOP1_HUMAN Thimet oligopeptidase	1	21.1592	11.1863	13.6281	15.3245	28.3576	30.888	25.9076	28.3844	1.85222	0.0171845	0.889256	1.76486
sp|Q96JI7|SPTCS_HUMAN	SPG11	SPTCS_HUMAN Spatacsin	2	29.2956	25.3722	25.0281	26.5653	47.2107	50.2989	50.0894	49.1997	1.85203	0.00018099	0.889106	3.74235
sp|Q9BRQ6|CHCH6_HUMAN	CHCHD6	CHCH6_HUMAN Coiled-coil-helix-coiled-coil-helix domain-containing protein 6, mitochondrial	2	52.1372	63.0051	59.1225	58.0883	96.1407	113.253	113.219	107.538	1.85128	0.00162614	0.888521	2.78884						PDK1	GPR84			FOSL1	OXSR1
sp|Q15833|STXB2_HUMAN	STXBP2	STXB2_HUMAN Syntaxin-binding protein 2	3	45.9982	37.9005	47.8268	43.9085	83.4179	86.3512	73.9117	81.227	1.84991	0.0015194	0.887458	2.81833
sp|Q9UDY2-7|ZO2_HUMAN	TJP2	ZO2_HUMAN Isoform 7 of Tight junction protein ZO-2	1	15.8748	16.3843	16.469	16.2427	29.9527	30.7503	29.256	29.9863	1.84614	8.13501e-06	0.884513	5.08964
sp|P60981|DEST_HUMAN	DSTN	DEST_HUMAN Destrin	1	19.0867	18.1803	14.9761	17.4144	28.6436	35.8742	31.8597	32.1259	1.84479	0.00378526	0.883457	2.4219							OR10H2			KCTD1
sp|Q03169|TNAP2_HUMAN	TNFAIP2	TNAP2_HUMAN Tumor necrosis factor alpha-induced protein 2	2	31.2502	24.8754	26.6037	27.5765	45.7429	54.4657	52.1959	50.8015	1.84221	0.00198801	0.881434	2.70158
sp|P28288|ABCD3_HUMAN	ABCD3	ABCD3_HUMAN ATP-binding cassette sub-family D member 3	9	254.777	287.422	273.686	271.961	491.452	468.44	538.581	499.491	1.83662	0.000557785	0.877057	3.25353		ARL6IP1	RAB2A	B3GALT5	ATP6V0E2	ACOT2	ADGRB3	DENND6A	GSTK1	AFF4	ADH1A	BNIP3	ATP6V1G3	VPS25
sp|P31947|1433S_HUMAN	SFN	1433S_HUMAN 14-3-3 protein sigma	6	232.524	165.74	175.733	191.332	332.831	383.687	337.022	351.18	1.83545	0.00376692	0.876131	2.42401
sp|Q9UIQ6|LCAP_HUMAN	LNPEP	LCAP_HUMAN Leucyl-cystinyl aminopeptidase	30	735.265	753.917	704.658	731.28	1337.47	1345.09	1332.5	1338.36	1.83016	2.12145e-06	0.871966	5.67337							TAAR9			RECQL
sp|P08243|ASNS_HUMAN	ASNS	ASNS_HUMAN Asparagine synthetase [glutamine-hydrolyzing]	4	165.209	116.404	118.575	133.396	232.409	260.828	238.765	244.001	1.82914	0.00362946	0.871168	2.44016		KRTCAP2		SDF4		FPGS	CHRNA6			CHD8	DUPD1
sp|P49754|VPS41_HUMAN	VPS41	VPS41_HUMAN Vacuolar protein sorting-associated protein 41 homolog	3	167.659	144.209	148.455	153.441	278.315	297.908	265.171	280.465	1.82784	0.000441694	0.870136	3.35488
sp|P05362|ICAM1_HUMAN	ICAM1	ICAM1_HUMAN Intercellular adhesion molecule 1	9	165.669	201.967	184.258	183.965	341.35	339.347	326.041	335.579	1.82415	0.00019305	0.867224	3.71433							RTN4R			PNRC1
sp|Q8NHG7|SVIP_HUMAN	SVIP	SVIP_HUMAN Small VCP/p97-interacting protein	1	29.2443	30.1354	28.0445	29.1414	47.4414	61.1815	50.7953	53.1394	1.8235	0.00456129	0.86671	2.34091
sp|Q5VV42|CDKAL_HUMAN	CDKAL1	CDKAL_HUMAN Threonylcarbamoyladenosine tRNA methylthiotransferase	2	25.0478	32.5938	30.7262	29.4559	54.1733	47.0036	59.8443	53.6738	1.82217	0.00511311	0.865658	2.29131		ZFAND2B				OPA3	GPR3			FANCI	NRBP2
sp|P23528|COF1_HUMAN	CFL1	COF1_HUMAN Cofilin-1	7	328.113	229.54	226.437	261.363	437.607	527.652	459.469	474.909	1.81705	0.00767928	0.861595	2.11468						PCCB	GPR6			FGF14	NUDT4
sp|Q15075|EEA1_HUMAN	EEA1	EEA1_HUMAN Early endosome antigen 1	15	375.77	322.206	362.625	353.534	627.925	659.325	638.523	641.924	1.81574	0.000100341	0.860556	3.99852							OR12D1			KLF15
sp|P52569-3|CTR2_HUMAN	SLC7A2	CTR2_HUMAN Isoform 3 of Low affinity cationic amino acid transporter 2	13	531.43	531.079	480.02	514.176	853.332	1032.89	908.022	931.415	1.81147	0.00171198	0.857161	2.7665
sp|Q9Y6M5|ZNT1_HUMAN	SLC30A1	ZNT1_HUMAN Zinc transporter 1	6	307.268	408.653	335.187	350.37	630.878	630.66	641.251	634.263	1.81027	0.000735477	0.856204	3.13343
sp|Q5T1M5|FKB15_HUMAN	FKBP15	FKB15_HUMAN FK506-binding protein 15	18	712.722	545.462	562.313	606.832	1039.75	1090.32	1164.15	1098.07	1.80952	0.00157465	0.855606	2.80282							OR51M1			MORF4L2
sp|Q6NUK4|REEP3_HUMAN	REEP3	REEP3_HUMAN Receptor expression-enhancing protein 3	1	42.5475	37.5695	40.4064	40.1745	68.3057	76.1266	73.0155	72.4826	1.8042	0.000276273	0.851355	3.55866										ZNF582
sp|Q5T3F8|TM63B_HUMAN	TMEM63B	TM63B_HUMAN Transmembrane protein 63B	3	62.4398	64.9029	59.1097	62.1508	111.595	107.05	117.559	112.068	1.80316	0.000136503	0.850526	3.86486
sp|Q9Y548|YIPF1_HUMAN	YIPF1	YIPF1_HUMAN Protein YIPF1	1	44.1883	56.0936	48.9102	49.7307	90.2826	92.4969	86.1095	89.6297	1.8023	0.000532759	0.84984	3.27347
sp|Q8TCG2|P4K2B_HUMAN	PI4K2B	P4K2B_HUMAN Phosphatidylinositol 4-kinase type 2-beta	1	62.4282	67.0704	80.4976	69.9987	124.23	121.74	132.488	126.153	1.80221	0.000884883	0.849768	3.05311										ZBTB46
sp|P05161|ISG15_HUMAN	ISG15	ISG15_HUMAN Ubiquitin-like protein ISG15	3	164.56	87.4589	100.641	117.553	208.299	206.119	220.492	211.636	1.80034	0.0177875	0.848273	1.74989							SLC13A5			POU3F4
sp|P41440|S19A1_HUMAN	SLC19A1	S19A1_HUMAN Folate transporter 1	2	34.0014	48.3979	44.8306	42.41	76.2777	76.5463	75.9685	76.2642	1.79826	0.00144675	0.846601	2.83961
sp|P31939|PUR9_HUMAN	ATIC	PUR9_HUMAN Bifunctional purine biosynthesis protein PURH	3	61.0783	111.171	60.9315	77.727	134.774	148.565	135.372	139.571	1.79565	0.0233505	0.844506	1.6317		LPCAT4		SLC35A2		GCDH	CHRNG			CIITA	EDARADD
sp|Q14697|GANAB_HUMAN	GANAB	GANAB_HUMAN Neutral alpha-glucosidase AB	6	195.079	231.817	192.975	206.624	252.714	410.304	448.38	370.466	1.79295	0.0554088	0.842333	1.25642							OR5G3			NARF
sp|P51511|MMP15_HUMAN	MMP15	MMP15_HUMAN Matrix metalloproteinase-15	2	14.1005	17.9712	12.2505	14.7741	26.9677	26.4158	25.9346	26.4394	1.78958	0.00242281	0.839619	2.61568							TRBV20-1			SFSWAP
sp|P21333|FLNA_HUMAN	FLNA	FLNA_HUMAN Filamin-A	161	7968.93	6304.08	5801.55	6691.52	12221.8	11954.2	11670.9	11948.9	1.78568	0.00145739	0.836476	2.83642							OR52B4			MSGN1
sp|Q86VZ5|SMS1_HUMAN	SGMS1	SMS1_HUMAN Phosphatidylcholine:ceramide cholinephosphotransferase 1	1	31.5637	37.4843	36.0533	35.0338	60.2012	61.0175	66.4443	62.5544	1.78554	0.000485024	0.836364	3.31424
sp|P08581-2|MET_HUMAN	MET	MET_HUMAN Isoform 2 of Hepatocyte growth factor receptor	12	443.748	561.855	519.65	508.418	911.316	905.471	905.93	907.572	1.78509	0.000322611	0.835998	3.49132							TRAV6			SCAF1
sp|P30154-2|2AAB_HUMAN	PPP2R1B	2AAB_HUMAN Isoform 2 of Serine/threonine-protein phosphatase 2A 65 kDa regulatory subunit A beta isoform	2	85.3171	70.1402	69.749	75.0688	126.111	148.565	127.073	133.916	1.78392	0.00276201	0.835048	2.55877										ZNF165
sp|Q12846|STX4_HUMAN	STX4	STX4_HUMAN Syntaxin-4	14	389.586	482.877	482.129	451.531	786.621	754.019	874.196	804.946	1.7827	0.00172893	0.834067	2.76222
sp|Q99720|SGMR1_HUMAN	SIGMAR1	SGMR1_HUMAN Sigma non-opioid intracellular receptor 1	4	201.662	150.09	165.333	172.361	261.597	334.854	324.762	307.071	1.78155	0.00811246	0.833135	2.09085
sp|Q9ULM0|PKHH1_HUMAN	PLEKHH1	PKHH1_HUMAN Pleckstrin homology domain-containing family H member 1	1	9.19713	11.9058	11.1348	10.7459	21.6194	22.1793	13.6255	19.1414	1.78127	0.043358	0.83291	1.36293										ZFP3
sp|P01891|1A68_HUMAN	HLA-A	1A68_HUMAN HLA class I histocompatibility antigen, A-68 alpha chain	4	132.715	164.421	152.405	149.847	288.459	251.052	260.993	266.835	1.78071	0.00128529	0.832456	2.891							PDCD1			PAX2
sp|O14818|PSA7_HUMAN	PSMA7	PSA7_HUMAN Proteasome subunit alpha type-7	11	348.281	251.811	269.255	289.782	518.596	569.014	459.777	515.796	1.77994	0.00644297	0.831831	2.19091										ZNF280C
sp|Q14435|GALT3_HUMAN	GALNT3	GALT3_HUMAN Polypeptide N-acetylgalactosaminyltransferase 3	5	134.227	159.871	174.962	156.354	280.272	281.219	272.978	278.156	1.77902	0.000560487	0.831082	3.25143							OR5D14			NANOGP8
sp|Q9UHK6-5|AMACR_HUMAN	AMACR	AMACR_HUMAN Isoform 4 of Alpha-methylacyl-CoA racemase	3	26.0224	31.7723	41.9076	33.2341	59.6921	61.186	56.2054	59.0278	1.77612	0.00611248	0.828732	2.21378		ELOVL5		GGA1	SLC2A6	COX10	CATSPERZ	WASH6P		BUB1	CASP8
sp|Q96MM7-4|H6ST2_HUMAN	HS6ST2	H6ST2_HUMAN Isoform 4 of Heparan-sulfate 6-O-sulfotransferase 2	1	51.9924	61.7463	50.3429	54.6938	92.1408	100.693	98.5293	97.1209	1.77572	0.000639953	0.828403	3.19385							PTGER4			PHIP
sp|P08572|CO4A2_HUMAN	COL4A2	CO4A2_HUMAN Collagen alpha-2(IV) chain	4	101.63	135.767	118.071	118.489	216.342	193.054	221.704	210.367	1.77541	0.00224518	0.82815	2.64875						SLC25A25	ITGAL			GPKOW	PTPN22
sp|Q8IZV5|RDH10_HUMAN	RDH10	RDH10_HUMAN Retinol dehydrogenase 10	1	17.9441	23.775	16.1987	19.306	34.2622	35.2876	33.2688	34.2729	1.77525	0.00318391	0.828022	2.49704										ZNF577
sp|Q6PJG9|LRFN4_HUMAN	LRFN4	LRFN4_HUMAN Leucine-rich repeat and fibronectin type-III domain-containing protein 4	2	55.6487	52.1124	47.5759	51.779	86.941	98.1897	90.5668	91.8992	1.77483	0.00058592	0.827684	3.23216							TAS2R46			RFC3
sp|Q15286|RAB35_HUMAN	RAB35	RAB35_HUMAN Ras-related protein Rab-35	8	485.862	574.984	505.512	522.119	902.801	914.021	962.841	926.554	1.7746	0.000246164	0.827496	3.60878										ZNF487
sp|P68036-3|UB2L3_HUMAN	UBE2L3	UB2L3_HUMAN Isoform 3 of Ubiquitin-conjugating enzyme E2 L3	2	56.2181	41.9632	40.5828	46.2547	82.7606	82.4247	81.0072	82.0642	1.77418	0.00205208	0.827153	2.68781
sp|Q9P0J1-2|PDP1_HUMAN	PDP1	PDP1_HUMAN Isoform 2 of [Pyruvate dehydrogenase [acetyl-transferring]]-phosphatase 1, mitochondrial	11	234.784	288.574	277.977	267.112	461.854	462.527	497.318	473.9	1.77416	0.000512579	0.827139	3.29024										XRCC4
sp|Q96SU4-6|OSBL9_HUMAN	OSBPL9	OSBL9_HUMAN Isoform 6 of Oxysterol-binding protein-related protein 9	5	164.001	116.069	146.532	142.201	238.552	265.662	252.463	252.225	1.77373	0.00236731	0.826785	2.62574										UBE2E1
sp|P13797|PLST_HUMAN	PLS3	PLST_HUMAN Plastin-3	31	1159.55	794.722	835.609	929.961	1643.29	1771.59	1526.95	1647.27	1.77134	0.00608194	0.824838	2.21596										ZFP64
sp|P30041|PRDX6_HUMAN	PRDX6	PRDX6_HUMAN Peroxiredoxin-6	8	319.163	241.831	224.923	261.972	489.68	394.704	507.541	463.975	1.77108	0.0113134	0.824632	1.9464										ZNF213
sp|Q02388|CO7A1_HUMAN	COL7A1	CO7A1_HUMAN Collagen alpha-1(VII) chain	32	537.645	708.82	561.805	602.757	1085.92	944.978	1167.72	1066.2	1.76888	0.00531768	0.822837	2.27428						SLC25A3	ITGB4			GSC	RAB3GAP1
sp|Q9BTC0|DIDO1_HUMAN	DIDO1	DIDO1_HUMAN Death-inducer obliterator 1	3	150.392	96.0693	127.022	124.495	203.111	236.991	220.104	220.069	1.7677	0.00670138	0.821871	2.17384							NLGN2			ICE2	XPNPEP1
sp|P28072|PSB6_HUMAN	PSMB6	PSB6_HUMAN Proteasome subunit beta type-6	3	121.67	87.5422	88.964	99.3921	169.382	181.171	176.321	175.624	1.76699	0.00282797	0.821291	2.54852										ZNF285
sp|O94925-3|GLSK_HUMAN	GLS	GLSK_HUMAN Isoform 3 of Glutaminase kidney isoform, mitochondrial	8	152.315	192.978	181.958	175.75	305.783	293.779	331.88	310.481	1.7666	0.00123897	0.820976	2.90694							OR6X1			NICN1
sp|P12277|KCRB_HUMAN	CKB	KCRB_HUMAN Creatine kinase B-type	2	28.3459	24.4526	21.1415	24.6467	42.8161	44.1901	43.5375	43.5146	1.76554	0.000880004	0.820106	3.05552						PRELID3A	GYPA			FOXM1	PFKM
sp|Q06481|APLP2_HUMAN	APLP2	APLP2_HUMAN Amyloid-like protein 2	13	737.41	714.175	699.47	717.018	1223.65	1298.3	1273.83	1265.26	1.76461	2.39615e-05	0.819353	4.62049		FMO2		HS3ST2		CYP11B2	CD53			CCNE2	CNTF
sp|Q9HC36|RMTL1_HUMAN	RNMTL1	RMTL1_HUMAN RNA methyltransferase-like protein 1	3	45.3349	41.4213	54.2069	46.9877	64.5171	91.3033	92.829	82.8831	1.76393	0.0225409	0.818796	1.64703										ZNF628
tr|H0Y830|H0Y830_HUMAN	AXIN1	H0Y830_HUMAN Axin-1 (Fragment)	2	53.2005	60.1044	64.5877	59.2975	111.489	101.065	101.008	104.52	1.76264	0.000711566	0.817739	3.14779		PIEZO1		TMEM79		L2HGDH	CPLX3			DACH2	FTSJ1
sp|P36871-2|PGM1_HUMAN	PGM1	PGM1_HUMAN Isoform 2 of Phosphoglucomutase-1	4	75.6426	71.4047	69.3942	72.1471	125.958	126.657	128.794	127.136	1.76218	1.10333e-05	0.817358	4.9573										ZBTB24
sp|P12259|FA5_HUMAN	F5	FA5_HUMAN Coagulation factor V	2	49.1259	41.0859	36.7422	42.318	67.8668	80.9393	74.5717	74.4593	1.75952	0.00356741	0.81518	2.44765							OR4A16			MED13
sp|Q53TN4|CYBR1_HUMAN	CYBRD1	CYBR1_HUMAN Cytochrome b reductase 1	3	95.5294	95.2312	95.4217	95.3941	154.542	189.626	158.761	167.643	1.75737	0.00283619	0.81342	2.54727						UQCRFS1	LY6G6C			HLF	SULT1C2
sp|Q8NFB2|T185A_HUMAN	TMEM185A	T185A_HUMAN Transmembrane protein 185A	1	19.2454	24.0548	18.9204	20.7402	34.0106	41.0381	34.1518	36.4002	1.75505	0.00536101	0.811516	2.27075
sp|O75436|VP26A_HUMAN	VPS26A	VP26A_HUMAN Vacuolar protein sorting-associated protein 26A	1	18.8003	23.0127	20.2298	20.6809	38.2236	36.01	34.6158	36.2831	1.75443	0.000654001	0.810999	3.18442
sp|P33897|ABCD1_HUMAN	ABCD1	ABCD1_HUMAN ATP-binding cassette sub-family D member 1	12	259.476	327.351	304.591	297.14	520.179	478.554	563.773	520.835	1.75283	0.00211978	0.809686	2.67371		ANKLE2	PTPN2	B3GALT4	ATP6V0E1	ACOT11	ADGRB2	DENND10P1	GNPAT	AFF3	ACY1	BECN1	ATP6V1G2	UBAP1
sp|P26447|S10A4_HUMAN	S100A4	S10A4_HUMAN Protein S100-A4	4	316.975	174.338	172.669	221.327	342.285	466.675	352.997	387.319	1.74998	0.0559319	0.80734	1.25234										ZNF808
sp|O94925|GLSK_HUMAN	GLS	GLSK_HUMAN Glutaminase kidney isoform, mitochondrial	27	1018.18	1276.62	1188.94	1161.25	2078.34	1825.85	2192.26	2032.15	1.74997	0.00275026	0.807331	2.56063							OR6V1			NHP2
sp|Q9H2X0|CHRD_HUMAN	CHRD	CHRD_HUMAN Chordin	2	51.5323	50.5864	46.8977	49.6721	93.4695	81.6669	85.3697	86.8354	1.74817	0.000588547	0.805847	3.23022						PNPLA4	GRIN3B			FOXF2	PCMTD2
sp|O15120|PLCB_HUMAN	AGPAT2	PLCB_HUMAN 1-acyl-sn-glycerol-3-phosphate acyltransferase beta	1	133.892	164.125	161.678	153.232	252.329	253.347	297.846	267.841	1.74794	0.00303423	0.805659	2.51795		CYP4B1		ENTPD4	LAMTOR2	BCS1L	ATP4A	SNX13		ATXN8	ATG4B
sp|Q14571|ITPR2_HUMAN	ITPR2	ITPR2_HUMAN Inositol 1,4,5-trisphosphate receptor type 2	9	236.008	296.683	269.185	267.292	452.046	444.198	505.078	467.108	1.74756	0.00153001	0.805338	2.81531							SLC22A1			PRDM12
sp|Q9NUQ9|FA49B_HUMAN	FAM49B	FA49B_HUMAN Protein FAM49B	4	91.7081	92.6787	85.303	89.8966	173.082	160.611	137.114	156.936	1.74574	0.00342114	0.803836	2.46583							OR4F5			MEN1
sp|Q99715|COCA1_HUMAN	COL12A1	COCA1_HUMAN Collagen alpha-1(XII) chain	12	202.948	229.599	209.348	213.965	383.334	363.782	372.276	373.13	1.74388	8.49908e-05	0.802304	4.07063						SLC25A20	INPP5A			GNL3L	PRUNE2
sp|O75934|SPF27_HUMAN	BCAS2	SPF27_HUMAN Pre-mRNA-splicing factor SPF27	2	34.6335	28.7873	38.2644	33.8951	56.6377	65.3147	54.7347	58.8957	1.73759	0.00424219	0.797086	2.37241		POGLUT1		VPS52		MDH2	DCST1			DDX5	GPCPD1
sp|O14657|TOR1B_HUMAN	TOR1B	TOR1B_HUMAN Torsin-1B	4	225.875	236.136	228.851	230.287	422.566	363.771	413.409	399.915	1.73659	0.000788337	0.79626	3.10329
sp|P05026|AT1B1_HUMAN	ATP1B1	AT1B1_HUMAN Sodium/potassium-transporting ATPase subunit beta-1	8	260.739	321.957	270.516	284.404	509.121	460.439	510.685	493.415	1.73491	0.00114526	0.794859	2.9411		MESD		SLC9A8		GLRX5	CLDN15			CLSPN	EIF3B
sp|O14967|CLGN_HUMAN	CLGN	CLGN_HUMAN Calmegin	17	599.162	748.997	733.808	693.989	1295.4	1082.21	1231.66	1203.09	1.73359	0.0029996	0.79376	2.52294						PYCR1	HCN3			FOXR1	PHPT1
sp|Q86YQ8|CPNE8_HUMAN	CPNE8	CPNE8_HUMAN Copine-8	3	68.2051	56.2733	48.0753	57.5179	97.842	103.379	97.3325	99.518	1.73021	0.00241401	0.790946	2.61726						TACO1	KIR2DL2			H2AFY2	SAMD5
sp|P01024|CO3_HUMAN	C3	CO3_HUMAN Complement C3	15	293.56	337.474	322.098	317.711	575.458	505.286	567.911	549.551	1.72972	0.000835404	0.790542	3.0781		SERP2				MRPL58	FCER1G			DUX4L7	ISYNA1
sp|Q00059|TFAM_HUMAN	TFAM	TFAM_HUMAN Transcription factor A, mitochondrial	11	324.232	376.242	356.416	352.297	516.852	668.768	641.802	609.141	1.72906	0.00642058	0.789984	2.19243
sp|Q9H3S7|PTN23_HUMAN	PTPN23	PTN23_HUMAN Tyrosine-protein phosphatase non-receptor type 23	2	24.8221	23.9251	23.7343	24.1605	40.5264	46.0595	38.7107	41.7656	1.72867	0.00140495	0.789665	2.85234										ZNF367
sp|Q14596|NBR1_HUMAN	NBR1	NBR1_HUMAN Next to BRCA1 gene 1 protein	3	54.0518	45.9197	45.7457	48.5724	83.0539	86.958	81.7694	83.9271	1.72788	0.000360311	0.789	3.44332										SYCE3
sp|Q9UKG9-3|OCTC_HUMAN	CROT	OCTC_HUMAN Isoform 3 of Peroxisomal carnitine O-octanoyltransferase	2	18.3697	21.7672	23.3225	21.1531	40.6754	32.6772	35.5537	36.3021	1.71616	0.00535729	0.779183	2.27106						TIMM23	KLRF2			HBP1	SERPINB8
sp|P31946|1433B_HUMAN	YWHAB	1433B_HUMAN 14-3-3 protein beta/alpha	11	466.682	308.043	333.852	369.526	601.84	673.863	625.396	633.7	1.7149	0.00784152	0.778124	2.1056
tr|E7ESP4|E7ESP4_HUMAN	ITGA2	E7ESP4_HUMAN Integrin alpha-2	1	24.7514	30.2741	22.0884	25.7046	57.4542	14.149	60.4443	44.0158	1.71237	0.29339	0.775995	0.532554							SLC16A5			PPIL1
sp|O75815|BCAR3_HUMAN	BCAR3	BCAR3_HUMAN Breast cancer anti-estrogen resistance protein 3	17	622.076	559.501	480.474	554.017	982.774	970.107	889.751	947.544	1.71032	0.00143741	0.774262	2.84242		POFUT1		VPS51		MCUR1	DCHS1			DDX47	GOT1L1
sp|O00186|STXB3_HUMAN	STXBP3	STXB3_HUMAN Syntaxin-binding protein 3	7	198.55	203.84	219.957	207.449	348.94	346.41	368.992	354.78	1.7102	0.000105853	0.774169	3.9753
sp|Q96RL7|VP13A_HUMAN	VPS13A	VP13A_HUMAN Vacuolar protein sorting-associated protein 13A	2	23.1989	21.845	26.7335	23.9258	38.589	42.9636	41.159	40.9039	1.70961	0.000925689	0.773671	3.03354
sp|P14324|FPPS_HUMAN	FDPS	FPPS_HUMAN Farnesyl pyrophosphate synthase	6	296.624	278.667	267.605	280.965	529.169	439.461	469.888	479.506	1.70664	0.0019959	0.771156	2.69986							OR51A4			MLH1
sp|P28074|PSB5_HUMAN	PSMB5	PSB5_HUMAN Proteasome subunit beta type-5	10	392.321	308.531	308.242	336.365	577.207	582.353	561.789	573.783	1.70584	0.00115797	0.770479	2.9363										ZNF284
sp|Q8NHP6|MSPD2_HUMAN	MOSPD2	MSPD2_HUMAN Motile sperm domain-containing protein 2	8	333.652	344.726	343.844	340.741	571.387	558.783	609.903	580.024	1.70225	0.000110294	0.767439	3.95745							TRBV4-1			SIM1
sp|P20618|PSB1_HUMAN	PSMB1	PSB1_HUMAN Proteasome subunit beta type-1	9	371.891	284.859	283.774	313.508	514.87	565.373	519.94	533.394	1.70137	0.00273107	0.766701	2.56367										ZNF280D
sp|P19623|SPEE_HUMAN	SRM	SPEE_HUMAN Spermidine synthase	1	24.7685	19.3284	17.3939	20.497	31.4706	38.846	34.2542	34.857	1.70059	0.00959197	0.766036	2.01809
sp|O60353|FZD6_HUMAN	FZD6	FZD6_HUMAN Frizzled-6	1	28.6074	34.5017	33.8508	32.32	58.3957	53.3619	53.0875	54.9484	1.70014	0.000879264	0.765651	3.05588							OR5AK2			MYSM1
sp|O43493|TGON2_HUMAN	TGOLN2	TGON2_HUMAN Trans-Golgi network integral membrane protein 2	7	327.597	330.027	325.07	327.565	601.588	463.038	605.194	556.607	1.69923	0.0080892	0.764879	2.09209
sp|Q9Y5P4-3|C43BP_HUMAN	COL4A3BP	C43BP_HUMAN Isoform 3 of Collagen type IV alpha-3-binding protein	3	69.1291	55.3604	58.5391	61.0095	104.273	111.332	95.0649	103.557	1.69738	0.00248464	0.763313	2.60474						SLC25A26	ITGAM			GRHL1	PTPN9
sp|Q8WUX1|S38A5_HUMAN	SLC38A5	S38A5_HUMAN Sodium-coupled neutral amino acid transporter 5	10	255.873	330.431	288.113	291.472	501.477	474.939	506.905	494.44	1.69636	0.00102746	0.762439	2.98823
sp|Q7L2J0|MEPCE_HUMAN	MEPCE	MEPCE_HUMAN 7SK snRNA methylphosphate capping enzyme	1	12.3983	13.3345	12.3977	12.7102	21.8598	19.6645	23.124	21.5494	1.69545	0.00112119	0.76167	2.95032							TRAV41			SATB1
sp|Q9BXS5-2|AP1M1_HUMAN	AP1M1	AP1M1_HUMAN Isoform 2 of AP-1 complex subunit mu-1	9	305.018	233.364	278.223	272.202	453.901	459.675	470.45	461.342	1.69485	0.000914099	0.76116	3.03901		FADS3		GOLT1B	WDR59	CPOX	CD300LB			CBX8	CHM
sp|P78537|BL1S1_HUMAN	BLOC1S1	BL1S1_HUMAN Biogenesis of lysosome-related organelles complex 1 subunit 1	5	202.608	156.293	171.026	176.642	242.037	372.594	281.283	298.638	1.69064	0.0409695	0.757568	1.38754		PTPN5				MMAA	DSC1			DHX38	GSTO1
sp|Q6RW13-2|ATRAP_HUMAN	AGTRAP	ATRAP_HUMAN Isoform 2 of Type-1 angiotensin II receptor-associated protein	1	30.8877	24.7033	24.7066	26.7659	52.0108	32.7354	50.9849	45.2437	1.69035	0.0486511	0.757321	1.31291		CYP4F3		FHDC1	LAPTM4B	BRI3BP	AVPR2	SNX19		BAP18	AXIN2
sp|O43592|XPOT_HUMAN	XPOT	XPOT_HUMAN Exportin-T	2	31.7672	26.2842	28.5425	28.8646	47.307	50.331	48.6086	48.7489	1.68888	0.000395274	0.756066	3.4031
sp|Q6YHK3|CD109_HUMAN	CD109	CD109_HUMAN CD109 antigen	41	1387.12	1574.13	1421.31	1460.85	2615.8	2303.95	2480.92	2466.89	1.68866	0.00071423	0.755882	3.14616		TRAM1				NDUFAF6	GNRHR2			ESRP1	NBPF12
sp|Q92747|ARC1A_HUMAN	ARPC1A	ARC1A_HUMAN Actin-related protein 2/3 complex subunit 1A	1	27.7646	22.0647	22.1304	23.9866	30.3124	48.3715	42.6456	40.4432	1.68608	0.0436342	0.75367	1.36017		INSIG2		POMGNT1		FAM210B	CEMIP2			CENPP	DNAJC12
sp|Q96CF2|CHM4C_HUMAN	CHMP4C	CHM4C_HUMAN Charged multivesicular body protein 4c	3	100.94	80.9281	80.4817	87.45	134.082	152.378	155.793	147.418	1.68574	0.00326695	0.75338	2.48586						PHYKPL	GRIK3			FOXD4L1	PALD1
sp|P60900|PSA6_HUMAN	PSMA6	PSA6_HUMAN Proteasome subunit alpha type-6	9	274.264	236.403	246.239	252.302	422.223	450.752	402.944	425.306	1.6857	0.000645324	0.75335	3.19022										ZNF280B
sp|Q96FV9|THOC1_HUMAN	THOC1	THOC1_HUMAN THO complex subunit 1	1	11.1419	11.5608	15.1479	12.6169	21.8583	19.2602	22.5868	21.2351	1.68307	0.00605119	0.751099	2.21816
sp|P20908|CO5A1_HUMAN	COL5A1	CO5A1_HUMAN Collagen alpha-1(V) chain	14	504.031	664.949	605.291	591.424	1003.5	933.99	1043.77	993.752	1.68027	0.0021065	0.748694	2.67644						SLC25A29	ITGB3			GRWD1	QARS1
sp|O43747-2|AP1G1_HUMAN	AP1G1	AP1G1_HUMAN Isoform 2 of AP-1 complex subunit gamma-1	9	287.081	243.82	251.74	260.88	432.816	447.931	434.266	438.337	1.68022	0.000232173	0.748654	3.63419		FADS2P1		GOLT1A	WDR24	COX8C	CD300E			CBX7	CHKA
sp|Q04721|NOTC2_HUMAN	NOTCH2	NOTC2_HUMAN Neurogenic locus notch homolog protein 2	7	251.102	262.566	251.348	255.005	431.932	403.675	448.669	428.092	1.67876	0.000223604	0.747395	3.65052										THYN1
sp|O43306|ADCY6_HUMAN	ADCY6	ADCY6_HUMAN Adenylate cyclase type 6	1	10.853	11.319	10.1525	10.7748	18.8789	17.6944	17.6769	18.0834	1.6783	0.000151697	0.746999	3.81902		CYP2D6		COPG1	HEXB	ATP5PD	ASIC1	SAMD9L		ATF3	ARMC5
sp|P07948|LYN_HUMAN	LYN	LYN_HUMAN Tyrosine-protein kinase Lyn	1	23.5252	21.2084	23.5309	22.7549	39.0386	37.456	37.9691	38.1546	1.67677	6.92971e-05	0.745681	4.15929							TLCD3A			RNASEH2A
sp|Q96GC9|VMP1_HUMAN	VMP1	VMP1_HUMAN Vacuole membrane protein 1	1	25.6619	7.84007	32.0551	21.8523	33.0833	35.6418	41.1814	36.6355	1.6765	0.124703	0.745455	0.904123
sp|Q10567|AP1B1_HUMAN	AP1B1	AP1B1_HUMAN AP-1 complex subunit beta-1	7	188.416	149.882	164.514	167.604	269.006	302.186	271.318	280.837	1.6756	0.00187123	0.744676	2.72787		FADS2		GOLPH3L	TSPAN6	COX8A	CD300C			CBX6	CHAC2
sp|Q2M389|WASH7_HUMAN	KIAA1033	WASH7_HUMAN WASH complex subunit 7	4	206.998	147.565	179.478	178.013	270.34	318.853	304.902	298.032	1.67421	0.00587645	0.74348	2.23088							SLC2A3			PRPF39
sp|O75970|MPDZ_HUMAN	MPDZ	MPDZ_HUMAN Multiple PDZ domain protein	1	7.14629	9.71431	5.00111	7.28724	12.4611	11.5163	12.5636	12.1803	1.67146	0.0251546	0.74111	1.59938							TRBV5-4			SINHCAF
sp|Q9UHW9-2|S12A6_HUMAN	SLC12A6	S12A6_HUMAN Isoform 2 of Solute carrier family 12 member 6	9	354.445	391.718	362.291	369.485	623.486	625.606	603.217	617.436	1.67107	5.02372e-05	0.740775	4.29897
sp|Q9Y6G5|COMDA_HUMAN	COMMD10	COMDA_HUMAN COMM domain-containing protein 10	1	49.386	32.4027	33.3039	38.3642	52.3496	82.0831	57.8827	64.1051	1.67096	0.0733106	0.740679	1.13483						SLC25A32	IZUMO3			GSX2	RASA1
sp|P46108|CRK_HUMAN	CRK	CRK_HUMAN Adapter molecule crk	1	18.3333	10.8062	14.7262	14.6219	25.3783	25.9454	21.9419	24.4219	1.67023	0.0174235	0.740044	1.75886						TIMM22	KLRD1			HAND2	SERPINB7
sp|P01033|TIMP1_HUMAN	TIMP1	TIMP1_HUMAN Metalloproteinase inhibitor 1	1	28.8344	38.6956	33.1732	33.5677	60.5789	52.5987	54.784	55.9872	1.66789	0.00380616	0.738022	2.41951
sp|Q5NDL2|EOGT_HUMAN	EOGT	EOGT_HUMAN EGF domain-specific O-linked N-acetylglucosamine transferase	2	44.8198	63.1272	56.5236	54.8236	97.1585	78.974	97.7829	91.3051	1.66544	0.0111006	0.7359	1.95465							OR2B8P			LSM8
sp|P78330|SERB_HUMAN	PSPH	SERB_HUMAN Phosphoserine phosphatase	1	40.2149	38.0597	32.3314	36.8687	60.3898	66.1025	57.4307	61.3077	1.66287	0.00213246	0.733673	2.67112										ZNF335
sp|Q9H3M7|TXNIP_HUMAN	TXNIP	TXNIP_HUMAN Thioredoxin-interacting protein	5	130.936	175.648	159.515	155.366	276.524	210.107	288.142	258.258	1.66225	0.0203341	0.733139	1.69178
sp|Q01813|K6PP_HUMAN	PFKP	K6PP_HUMAN 6-phosphofructokinase type C	2	42.5331	33.3962	30.8202	35.5832	54.9464	61.1544	61.2696	59.1235	1.66156	0.00464971	0.732536	2.33257										ZBTB17
sp|Q00169|PIPNA_HUMAN	PITPNA	PIPNA_HUMAN Phosphatidylinositol transfer protein alpha isoform	2	121.291	100.423	85.1917	102.302	174.561	173.561	161.604	169.909	1.66085	0.00387363	0.731925	2.41188										ZC3H13
sp|Q9Y5K6|CD2AP_HUMAN	CD2AP	CD2AP_HUMAN CD2-associated protein	6	250.198	185.942	185.98	207.373	329.546	395.469	307.569	344.195	1.65978	0.0158095	0.730995	1.80108		TRIM59				NDUFB1	GPC3			ESS2	NBPF19
sp|Q06787|FMR1_HUMAN	FMR1	FMR1_HUMAN Fragile X mental retardation protein 1	5	255.473	244.57	273.442	257.828	386.334	465.63	430.07	427.345	1.65748	0.00226443	0.72899	2.64504							OR52E6			MSX2
sp|Q6P4Q7|CNNM4_HUMAN	CNNM4	CNNM4_HUMAN Metal transporter CNNM4	7	129.456	176.437	142.519	149.471	249.478	237.393	255.476	247.449	1.6555	0.00282148	0.727266	2.54952						SFXN3	IFITM10			GCM1	PPIP5K2
sp|Q6UXD5-5|SE6L2_HUMAN	SEZ6L2	SE6L2_HUMAN Isoform 5 of Seizure 6-like protein 2	8	280.407	274.742	251.91	269.02	448.431	425.516	460.367	444.771	1.6533	0.000196978	0.725351	3.70558
sp|P18433|PTPRA_HUMAN	PTPRA	PTPRA_HUMAN Receptor-type tyrosine-protein phosphatase alpha	1	22.7676	28.3388	25.4051	25.5038	43.5005	41.7401	41.2419	42.1608	1.65312	0.000678412	0.72519	3.16851										ZNF37A
sp|O15143|ARC1B_HUMAN	ARPC1B	ARC1B_HUMAN Actin-related protein 2/3 complex subunit 1B	5	168.186	155.116	170.782	164.695	269.495	264.194	282.824	272.171	1.65258	0.000128133	0.724719	3.89234		ITPR1		PRRC1		FARS2	CFAP65			CENPQ	DNPEP
sp|Q9BXB4|OSB11_HUMAN	OSBPL11	OSB11_HUMAN Oxysterol-binding protein-related protein 11	3	121.774	97.9493	103.783	107.835	170.583	180.403	181.873	177.62	1.64714	0.000950297	0.719962	3.02214										U2AF2
sp|Q01082-3|SPTB2_HUMAN	SPTBN1	SPTB2_HUMAN Isoform 2 of Spectrin beta chain, non-erythrocytic 1	1	7.00093	10.8928	10.975	9.62292	13.4383	18.2665	15.7979	15.8342	1.64547	0.0315023	0.718502	1.50166
sp|P04899-4|GNAI2_HUMAN	GNAI2	GNAI2_HUMAN Isoform sGi2 of Guanine nucleotide-binding protein G(i) subunit alpha-2	11	382.258	454.656	431.478	422.797	690.095	720.069	676.149	695.438	1.64485	0.000399541	0.717955	3.39844							OR7D4			NKX2-1
sp|Q8TCE6|FA45A_HUMAN	FAM45A	FA45A_HUMAN Protein FAM45A	3	72.0593	52.1028	57.1008	60.421	91.0734	111.977	94.7147	99.255	1.64272	0.0115921	0.716089	1.93584							OR4F4			MEIS3P2
sp|P13747|HLAE_HUMAN	HLA-E	HLAE_HUMAN HLA class I histocompatibility antigen, alpha chain E	3	50.0002	54.9185	49.5284	51.4824	85.087	85.9024	82.7168	84.5687	1.64267	7.37407e-05	0.716046	4.13229							PKD1L3			PAXBP1
sp|O14828|SCAM3_HUMAN	SCAMP3	SCAM3_HUMAN Secretory carrier-associated membrane protein 3	15	555.943	465.812	488.527	503.427	805.799	759.235	913.89	826.308	1.64137	0.00372405	0.714896	2.42898										ZNF845
sp|P06703|S10A6_HUMAN	S100A6	S10A6_HUMAN Protein S100-A6	6	427.094	230.479	257.811	305.128	411.605	605.757	482.515	499.959	1.63852	0.0803473	0.712394	1.09503										ZNF81
sp|Q16851|UGPA_HUMAN	UGP2	UGPA_HUMAN UTP--glucose-1-phosphate uridylyltransferase	8	350.81	289.88	273.549	304.746	486.536	528.053	481.208	498.599	1.63611	0.00221908	0.710272	2.65383
sp|Q86VZ4|LRP11_HUMAN	LRP11	LRP11_HUMAN Low-density lipoprotein receptor-related protein 11	3	42.7343	48.8306	39.6125	43.7258	74.0742	66.8462	73.652	71.5241	1.63574	0.00148185	0.709945	2.8292							TBC1D3C			RFX3
sp|P12268|IMDH2_HUMAN	IMPDH2	IMDH2_HUMAN Inosine-5'-monophosphate dehydrogenase 2	18	707.01	411.038	615.35	577.799	771.716	1052.21	1010.08	944.669	1.63494	0.0412242	0.70924	1.38485							SHC4			POLR3F
sp|Q15036|SNX17_HUMAN	SNX17	SNX17_HUMAN Sorting nexin-17	2	24.1297	29.4727	25.1099	26.2374	42.3835	45.4341	40.7082	42.8419	1.63286	0.00150601	0.707397	2.82217
sp|Q96RL1|UIMC1_HUMAN	UIMC1	UIMC1_HUMAN BRCA1-A complex subunit RAP80	3	100.463	79.2113	88.6592	89.4444	135.675	156.416	145.76	145.95	1.63174	0.00275475	0.706415	2.55992
sp|Q99598|TSNAX_HUMAN	TSNAX	TSNAX_HUMAN Translin-associated protein X	1	35.0171	31.9426	33.2327	33.3974	51.6402	59.3721	51.8869	54.2997	1.62587	0.00147711	0.701208	2.83059
sp|O00159|MYO1C_HUMAN	MYO1C	MYO1C_HUMAN Unconventional myosin-Ic	9	260	249.611	210.236	239.949	385.878	383.76	400.647	390.095	1.62574	0.000728893	0.701098	3.13734										SUDS3
sp|Q9NZV1|CRIM1_HUMAN	CRIM1	CRIM1_HUMAN Cysteine-rich motor neuron 1 protein	2	30.7078	33.2363	30.298	31.414	49.086	50.2237	53.615	50.9749	1.62268	0.00028409	0.698377	3.54654						TIMM17A	KIRREL2			H3F3C	SERPINB12
sp|P60891|PRPS1_HUMAN	PRPS1	PRPS1_HUMAN Ribose-phosphate pyrophosphokinase 1	1	39.2867	25.1019	31.2614	31.8833	50.7068	56.9635	47.4223	51.6976	1.62146	0.0163032	0.697293	1.78773										ZNF256
sp|P29590|PML_HUMAN	PML	PML_HUMAN Protein PML	2	65.6919	64.9817	61.0426	63.9054	107.033	98.7573	104.562	103.451	1.61881	0.000155802	0.694934	3.80743										ZFPM2
sp|O15228|GNPAT_HUMAN	GNPAT	GNPAT_HUMAN Dihydroxyacetone phosphate acyltransferase	5	148.672	168.006	170.722	162.467	265.785	264.769	258.333	262.962	1.61856	0.000163365	0.694711	3.78684							OR8D1			NKX6-3
sp|P50579|MAP2_HUMAN	METAP2	MAP2_HUMAN Methionine aminopeptidase 2	2	54.9183	44.5781	51.1019	50.1994	74.2957	86.3843	82.911	81.197	1.61749	0.00272329	0.693756	2.56491							TRAV8-1			SCAF4
sp|O15438-4|MRP3_HUMAN	ABCC3	MRP3_HUMAN Isoform 4 of Canalicular multispecific organic anion transporter 2	21	694.613	827.914	762.62	761.716	1239.83	1202.87	1250.95	1231.22	1.61637	0.000336166	0.69276	3.47345		ALG9	PIEZO1	B3GALT1	ATP6V0D1	ACO2	ADCYAP1R1	CLCN6	FAR1	AFF1	ACP1	ATG9B	ATP6V1F	STAM2
sp|Q99816|TS101_HUMAN	TSG101	TS101_HUMAN Tumor susceptibility gene 101 protein	9	569.602	474.61	424.075	489.429	729.113	874.7	768.331	790.715	1.61559	0.00778584	0.692058	2.10869
sp|O43824|GTPB6_HUMAN	GTPBP6	GTPB6_HUMAN Putative GTP-binding protein 6	3	74.5295	77.7605	82.2044	78.1648	124.629	132.561	121.505	126.231	1.61494	0.000267515	0.691479	3.57265							PCDHA11			NUGGC
sp|Q96JA1|LRIG1_HUMAN	LRIG1	LRIG1_HUMAN Leucine-rich repeats and immunoglobulin-like domains protein 1	1	6.89282	7.97271	9.31969	8.06174	11.0055	14.0788	13.9224	13.0022	1.61283	0.0155357	0.689595	1.80867							TBC1D3			RFC4
sp|Q16798|MAON_HUMAN	ME3	MAON_HUMAN NADP-dependent malic enzyme, mitochondrial	7	169.945	190.536	195.305	185.262	297.156	286.237	312.948	298.78	1.61275	0.000494772	0.689519	3.30559							TRAV38-2DV8			SAP30BP
sp|Q5VW38|GP107_HUMAN	GPR107	GP107_HUMAN Protein GPR107	5	191.918	223.413	221.711	212.347	331.07	335.734	359.245	342.016	1.61064	0.000645285	0.687639	3.19025							OTOP2			NPIPA1
sp|Q16706|MA2A1_HUMAN	MAN2A1	MA2A1_HUMAN Alpha-mannosidase 2	16	459.813	503.487	475.175	479.492	832.177	733.865	750.152	772.065	1.61017	0.000894084	0.687216	3.04862							TMEM30B			RP9
sp|P41743|KPCI_HUMAN	PRKCI	KPCI_HUMAN Protein kinase C iota type	2	27.2362	29.4357	30.9299	29.2006	45.5281	47.9917	47.4427	46.9875	1.60913	0.00016882	0.68628	3.77258										ZNF226
sp|P54578|UBP14_HUMAN	USP14	UBP14_HUMAN Ubiquitin carboxyl-terminal hydrolase 14	4	112.336	82.6375	89.4311	94.8014	147.765	159.294	150.502	152.521	1.60884	0.00390257	0.686024	2.40865
sp|O75071|EFC14_HUMAN	EFCAB14	EFC14_HUMAN EF-hand calcium-binding domain-containing protein 14	1	17.1609	20.3106	24.6166	20.696	31.8752	34.1531	33.6864	33.2382	1.60602	0.0052394	0.683489	2.28072							OR13C4			KLF4
sp|P36405|ARL3_HUMAN	ARL3	ARL3_HUMAN ADP-ribosylation factor-like protein 3	1	9.25078	6.5723	7.90593	7.90967	13.2422	12.7776	12.0318	12.6839	1.60359	0.00493419	0.681306	2.30678		HSD17B13		NDST1		EFHD1	CDHR2			CEBPG	DDX60
sp|P46976|GLYG_HUMAN	GYG1	GLYG_HUMAN Glycogenin-1	2	98.1941	72.841	84.933	85.3227	132.337	150.424	127.494	136.752	1.60276	0.00705582	0.680557	2.15145							PCDHA2			NUP188
sp|Q96HE7|ERO1A_HUMAN	ERO1L	ERO1A_HUMAN ERO1-like protein alpha	19	585.962	883.646	748.096	739.235	1186.06	1030.55	1332.48	1183.03	1.60034	0.0222952	0.67838	1.65179							OR2S2			MAU2
sp|Q68D85|NR3L1_HUMAN	NCR3LG1	NR3L1_HUMAN Natural cytotoxicity triggering receptor 3 ligand 1	2	70.4538	76.9606	76.6144	74.6763	115.001	127.958	114.922	119.294	1.59748	0.000757448	0.675797	3.12065										TAF12
sp|P05023|AT1A1_HUMAN	ATP1A1	AT1A1_HUMAN Sodium/potassium-transporting ATPase subunit alpha-1	65	2232.55	2969.8	2659.07	2620.47	4330.67	3869.8	4354.8	4185.09	1.59707	0.00415483	0.675431	2.38145		MBOAT7		SLC39A13		GLOD4	CLDN14			CLP1	EIF3A
sp|Q16595|FRDA_HUMAN	FXN	FRDA_HUMAN Frataxin, mitochondrial	1	18.5946	26.7354	26.9713	24.1004	26.3901	53.7245	35.1602	38.4249	1.59437	0.167824	0.672983	0.775146							OR5A1			MYOD1
sp|Q687X5|STEA4_HUMAN	STEAP4	STEA4_HUMAN Metalloreductase STEAP4	5	156.994	189.982	189.232	178.736	269.631	287.186	297.801	284.873	1.59382	0.00146555	0.672487	2.834
sp|Q9BWD1|THIC_HUMAN	ACAT2	THIC_HUMAN Acetyl-CoA acetyltransferase, cytosolic	2	37.4292	25.6792	33.4091	32.1725	48.0979	57.2925	48.3871	51.2592	1.59326	0.0140816	0.671981	1.85135		CERCAM		BET1	CLN3	ALAS2	AGTR2	PIK3C3	PEX19	AQR	AKR1C8P	NCOA4	NPRL3
sp|Q5SRD1|TI23B_HUMAN	TIMM23B	TI23B_HUMAN Putative mitochondrial import inner membrane translocase subunit Tim23B	5	149.575	190.74	170.218	170.177	276.325	268.187	268.48	270.997	1.59244	0.00116204	0.671238	2.93478
sp|P51648-2|AL3A2_HUMAN	ALDH3A2	AL3A2_HUMAN Isoform 2 of Fatty aldehyde dehydrogenase	20	885.223	1039.38	1041.86	988.823	1528.97	1538.19	1653.67	1573.61	1.5914	0.000871368	0.670294	3.0598		DNAJC3		GALNT5	PRCP	CMPK2	CACNG5	VPS33A		BNC2	CA3
sp|Q7Z2K8|GRIN1_HUMAN	GPRIN1	GRIN1_HUMAN G protein-regulated inducer of neurite outgrowth 1	1	26.6358	30.8882	24.8968	27.4736	46.854	43.5332	40.771	43.7194	1.59132	0.00290059	0.670228	2.53751							P2RX7			NR2C2
sp|Q9NY35|CLDN1_HUMAN	CLDND1	CLDN1_HUMAN Claudin domain-containing protein 1	1	19.3661	28.5587	25.7137	24.5462	42.3034	36.5136	38.3312	39.0494	1.59085	0.0106754	0.669802	1.97161						PTRH2	HCN2			FOXQ1	PGPEP1
sp|Q96T23|RSF1_HUMAN	RSF1	RSF1_HUMAN Remodeling and spacing factor 1	2	26.9754	31.1556	33.9707	30.7006	53.5196	45.3002	47.4908	48.7702	1.58858	0.00478295	0.667734	2.3203										ZNF781
sp|P20020|AT2B1_HUMAN	ATP2B1	AT2B1_HUMAN Plasma membrane calcium-transporting ATPase 1	28	818.168	1078.77	929.906	942.28	1614.91	1280.59	1594.44	1496.65	1.58833	0.01367	0.667506	1.86423		MGST3		ST3GAL3		GLYAT	CLDN19			COIL	EIF3F
sp|P28827-2|PTPRM_HUMAN	PTPRM	PTPRM_HUMAN Isoform 2 of Receptor-type tyrosine-protein phosphatase mu	5	124.464	162.79	131.672	139.642	232.174	207.418	225.395	221.662	1.58736	0.00411243	0.666631	2.3859										ZNF385C
sp|Q9BYC5|FUT8_HUMAN	FUT8	FUT8_HUMAN Alpha-(1,6)-fucosyltransferase	2	32.1811	34.9228	30.7011	32.6017	49.421	58.4479	47.0485	51.6392	1.58394	0.00667733	0.66352	2.1754							OR56B4			MYOCD
sp|Q13557-11|KCC2D_HUMAN	CAMK2D	KCC2D_HUMAN Isoform Delta 11 of Calcium/calmodulin-dependent protein kinase type II subunit delta	1	23.4149	25.4391	21.9684	23.6075	33.3766	43.2673	35.5333	37.3924	1.58392	0.0121303	0.663503	1.91613		SPTLC2				MRPS6	FZD10			EFCAB6	LDHA
sp|P12074|CX6A1_HUMAN	COX6A1	CX6A1_HUMAN Cytochrome c oxidase subunit 6A1, mitochondrial	1	27.2147	10.7788	29.0237	22.3391	25.8953	42.3943	37.8422	35.3773	1.58365	0.161742	0.663254	0.791178						STARD7	KCNT1			H2AB1	RPL8
sp|P53041|PPP5_HUMAN	PPP5C	PPP5_HUMAN Serine/threonine-protein phosphatase 5	1	10.8795	8.03069	9.61046	9.50688	14.8487	15.3801	14.9379	15.0556	1.58365	0.00272487	0.663252	2.56465										ZNF18
sp|O14936|CSKP_HUMAN	CASK	CSKP_HUMAN Peripheral plasma membrane protein CASK	8	313.918	364.476	362.394	346.929	553.11	529.582	565.511	549.401	1.58361	0.000494648	0.663217	3.3057		SUMF2				MTERF1	GALR2			ELL3	LZTFL1
sp|Q6Y288|B3GLT_HUMAN	B3GALTL	B3GLT_HUMAN Beta-1,3-glucosyltransferase	1	17.7381	21.3704	18.588	19.2322	30.5966	28.1105	32.6444	30.4505	1.58331	0.0027878	0.662945	2.55474		PIGG		TRAPPC1		LETM1	CRB3			DBX1	GAS7
sp|Q8NAV1|PR38A_HUMAN	PRPF38A	PR38A_HUMAN Pre-mRNA-splicing factor 38A	2	67.0568	67.0147	68.9954	67.689	118.042	103.616	99.7896	107.149	1.58296	0.00213192	0.662628	2.67123										ZNF25
sp|O60443|DFNA5_HUMAN	DFNA5	DFNA5_HUMAN Non-syndromic hearing impairment protein 5	3	103.122	87.4685	69.3168	86.6356	138.742	133.71	138.814	137.089	1.58236	0.00703233	0.662077	2.1529							NAPA			HOXC6	UBL4B
sp|Q86XX4-2|FRAS1_HUMAN	FRAS1	FRAS1_HUMAN Isoform 2 of Extracellular matrix protein FRAS1	1	23.2431	25.2363	24.2318	24.2371	37.088	38.0543	39.7846	38.309	1.58059	0.00013469	0.660467	3.87066							OR52M1			MXD3
sp|Q9BXF6|RFIP5_HUMAN	RAB11FIP5	RFIP5_HUMAN Rab11 family-interacting protein 5	14	588.831	435.042	463.8	495.891	785.949	785.206	777.86	783.005	1.57899	0.0037138	0.658998	2.43018										ZNF45
sp|P22694-2|KAPCB_HUMAN	PRKACB	KAPCB_HUMAN Isoform 2 of cAMP-dependent protein kinase catalytic subunit beta	5	325.525	297.687	293.511	305.575	453.324	517.251	476.727	482.434	1.57878	0.00112951	0.658807	2.94711										ZNF222
sp|O95297|MPZL1_HUMAN	MPZL1	MPZL1_HUMAN Myelin protein zero-like protein 1	5	251.701	272.613	263.711	262.675	417.845	407.981	418.006	414.611	1.57842	2.52717e-05	0.658478	4.59736							TRBV6-3			SKOR1
sp|O14975|S27A2_HUMAN	SLC27A2	S27A2_HUMAN Very long-chain acyl-CoA synthetase	15	418.213	449.258	473.999	447.157	741.865	644.541	729.966	705.457	1.57765	0.00172823	0.657778	2.7624
sp|P84095|RHOG_HUMAN	RHOG	RHOG_HUMAN Rho-related GTP-binding protein RhoG	8	217.123	255.562	205.4	226.028	369.659	353.252	345.568	356.16	1.57573	0.00147397	0.656021	2.83151										ZNF606
sp|Q14344|GNA13_HUMAN	GNA13	GNA13_HUMAN Guanine nucleotide-binding protein subunit alpha-13	9	294.837	307.679	304.586	302.367	506.558	463.57	455.732	475.286	1.57188	0.000443261	0.652495	3.35334							OR7C2			NKX1-1
sp|Q96AJ9|VTI1A_HUMAN	VTI1A	VTI1A_HUMAN Vesicle transport through interaction with t-SNAREs homolog 1A	2	106.521	98.189	110.374	105.028	160.204	184.126	150.394	164.908	1.57013	0.00490909	0.650884	2.309
sp|Q9Y696|CLIC4_HUMAN	CLIC4	CLIC4_HUMAN Chloride intracellular channel protein 4	3	86.5707	74.6975	75.1898	78.8193	123.868	131.545	115.505	123.64	1.56865	0.00176131	0.64952	2.75416						QRSL1	HCRTR1			FOXS1	PIGH
sp|Q99487|PAFA2_HUMAN	PAFAH2	PAFA2_HUMAN Platelet-activating factor acetylhydrolase 2, cytoplasmic	1	8.1183	12.6814	10.9428	10.5808	17.7099	16.9392	15.0929	16.5807	1.56705	0.0175899	0.648052	1.75474										USF3
sp|Q13751|LAMB3_HUMAN	LAMB3	LAMB3_HUMAN Laminin subunit beta-3	1	8.33148	7.5881	9.57032	8.49663	13.643	12.6982	13.5307	13.2906	1.56422	0.00180564	0.645446	2.74337							SLC6A19			RAD51AP1
sp|Q8N4N8|KIF2B_HUMAN	KIF2B	KIF2B_HUMAN Kinesin-like protein KIF2B	1	159.406	107.455	118.813	128.558	199.811	220.666	182.554	201.011	1.56358	0.0196662	0.644852	1.70628							SLC38A6			PSIP1
sp|P60709|ACTB_HUMAN	ACTB	ACTB_HUMAN Actin, cytoplasmic 1	45	1079.31	1231.01	1045.83	1118.72	1553.43	1924.88	1768.25	1748.86	1.56327	0.00663741	0.644567	2.178		CYBC1		CHST9	EPDR1	ATP5F1C	ANTXR1	RAB8A		ASCL2	APOL5	ULK2	SLC3A2
sp|P53985|MOT1_HUMAN	SLC16A1	MOT1_HUMAN Monocarboxylate transporter 1	6	277.698	334.418	325.894	312.67	471.408	490.584	503.919	488.637	1.56279	0.000924262	0.644122	3.0342
sp|O00154|BACH_HUMAN	ACOT7	BACH_HUMAN Cytosolic acyl coenzyme A thioester hydrolase	1	26.4845	24.2994	23.9578	24.9139	42.13	36.0138	38.6152	38.9197	1.56217	0.00195548	0.643549	2.70875		CH25H		CHST10	CTSK	ANTKMT	ALPL	RAB11FIP1	PXMP4	ARID4A	ALDH8A1	SNAP29	RHEB
sp|Q04917|1433F_HUMAN	YWHAH	1433F_HUMAN 14-3-3 protein eta	6	256.574	184.448	196.017	212.346	333.314	340.206	321.421	331.647	1.56182	0.00660312	0.64323	2.18025
sp|O43570|CAH12_HUMAN	CA12	CAH12_HUMAN Carbonic anhydrase 12	1	48.5903	55.0549	44.5392	49.3948	80.587	76.8582	73.8177	77.0876	1.56064	0.0015926	0.642141	2.79789		SLC37A2				MRPS23	FFAR4			E2F8	KPRP
sp|P57678|GEMI4_HUMAN	GEMIN4	GEMI4_HUMAN Gem-associated protein 4	2	23.1612	21.6954	22.2587	22.3718	33.8774	36.027	34.7534	34.8859	1.55937	7.80523e-05	0.640963	4.10761							OR5T1			NELFB
sp|Q9Y3C5|RNF11_HUMAN	RNF11	RNF11_HUMAN RING finger protein 11	2	64.4784	55.6544	60.4068	60.1799	103.093	63.5851	114.418	93.6989	1.55698	0.098392	0.638751	1.00704										ZNF620
sp|Q7LGA3|HS2ST_HUMAN	HS2ST1	HS2ST_HUMAN Heparan sulfate 2-O-sulfotransferase 1	3	98.1515	120.358	120.067	112.859	167.424	181.889	175.684	174.999	1.5506	0.00183254	0.632826	2.73695							PTGER3			PHF8
sp|P83111|LACTB_HUMAN	LACTB	LACTB_HUMAN Serine beta-lactamase-like protein LACTB, mitochondrial	4	74.563	87.4919	92.767	84.9406	128.413	128.263	138.415	131.697	1.55046	0.00182998	0.632696	2.73755							SLC5A12			RAB34
sp|O43752|STX6_HUMAN	STX6	STX6_HUMAN Syntaxin-6	8	153.936	166.411	166.759	162.368	259.996	257.129	236.764	251.296	1.54769	0.000459379	0.630118	3.33783
sp|P27701|CD82_HUMAN	CD82	CD82_HUMAN CD82 antigen	2	44.6312	43.0936	42.3633	43.3627	68.4195	69.314	63.5873	67.1069	1.54757	0.000235887	0.630007	3.6273		UGT1A10				NDUFC2-KCTD14	GPR148			EXO1	NCF2
sp|P05141|ADT2_HUMAN	SLC25A5	ADT2_HUMAN ADP/ATP translocase 2	10	425.906	482.189	498.752	468.949	719.011	725.034	729.688	724.578	1.54511	0.000328327	0.627711	3.48369
sp|P29218-3|IMPA1_HUMAN	IMPA1	IMPA1_HUMAN Isoform 3 of Inositol monophosphatase 1	1	37.5906	33.4518	27.1917	32.7447	51.3859	54.8428	45.2795	50.5027	1.54232	0.0125167	0.625101	1.90251							SEMA6B			POLR3B
sp|P30511-3|HLAF_HUMAN	HLA-F	HLAF_HUMAN Isoform 3 of HLA class I histocompatibility antigen, alpha chain F	1	50.3573	54.1044	47.3913	50.6176	80.7448	55.5047	97.764	78.0045	1.54105	0.0922884	0.623917	1.03485							PLB1			PAXIP1
sp|O95379|TFIP8_HUMAN	TNFAIP8	TFIP8_HUMAN Tumor necrosis factor alpha-induced protein 8	3	39.5779	27.3272	30.9251	32.61	51.4056	56.1436	43.0941	50.2144	1.53985	0.028805	0.622786	1.54053
sp|O60502|NCOAT_HUMAN	MGEA5	NCOAT_HUMAN Bifunctional protein NCOAT	1	21.5018	24.2546	20.3487	22.035	35.9457	36.0279	29.7359	33.9032	1.53861	0.00760912	0.621623	2.11867							TRBJ2-1			SERTAD3
sp|P00390|GSHR_HUMAN	GSR	GSHR_HUMAN Glutathione reductase, mitochondrial	9	292.074	342.912	325.044	320.01	491.465	469.281	515.127	491.958	1.53732	0.000991052	0.620417	3.0039							PCDH1			NSMCE1
sp|O95571|ETHE1_HUMAN	ETHE1	ETHE1_HUMAN Persulfide dioxygenase ETHE1, mitochondrial	5	173.168	236.311	204.407	204.629	331.331	289.39	320.844	313.855	1.53378	0.00787827	0.617089	2.10357							OR2T34			MBTD1
sp|Q9BR76|COR1B_HUMAN	CORO1B	COR1B_HUMAN Coronin-1B	2	85.9581	67.1666	65.0988	72.7412	108.941	115.926	109.525	111.464	1.53234	0.0052249	0.615732	2.28192						SLC27A3	KCNK3			GTF3C5	RNF166
sp|P49189|AL9A1_HUMAN	ALDH9A1	AL9A1_HUMAN 4-trimethylaminobutyraldehyde dehydrogenase	8	251.701	300.641	286.12	279.487	415.941	452.979	415.505	428.142	1.53188	0.00146986	0.615307	2.83272		DPM2		GANAB	RRAGC	COA8	CADM3	VPS37D		BRD7	CAPS
sp|Q5W111|SPRY7_HUMAN	SPRYD7	SPRY7_HUMAN SPRY domain-containing protein 7	4	212.584	235.895	251.885	233.455	353.894	284.875	432.254	357.008	1.52924	0.0486534	0.612812	1.31289
sp|Q15758|AAAT_HUMAN	SLC1A5	AAAT_HUMAN Neutral amino acid transporter B(0)	14	666.425	881.817	768.373	772.205	1237.49	1136.37	1168.46	1180.77	1.52909	0.00407306	0.612674	2.39008
tr|F6UT28|F6UT28_HUMAN	GNB1	F6UT28_HUMAN Guanine nucleotide-binding protein G(I)/G(S)/G(T) subunit beta-1 (Fragment)	4	105.729	129.324	122.725	119.259	191.346	174.922	180.567	182.278	1.52843	0.00178271	0.612046	2.74892							OR8A1			NKX2-6
sp|P43251|BTD_HUMAN	BTD	BTD_HUMAN Biotinidase	4	53.2494	70.844	58.0049	60.6994	92.4249	93.9792	91.8849	92.763	1.52824	0.00374628	0.611867	2.4264		RNF170				MRPL18	ENG			DMRTC2	HIPK4
sp|P53396|ACLY_HUMAN	ACLY	ACLY_HUMAN ATP-citrate synthase	16	495.681	360.669	366.625	407.658	622.308	631.759	612.338	622.135	1.52612	0.00845807	0.609866	2.07273		CERS5		CCDC91	CTSB	ALDH4A1	ALG10B	PPP1R21	PEX6	ARID1A	ALDH1A1	PHB2	PRKAG1
sp|Q9ULG6-5|CCPG1_HUMAN	CCPG1	CCPG1_HUMAN Isoform 5 of Cell cycle progression protein 1	14	449.941	545.481	568.531	521.318	700.147	856.592	829.869	795.536	1.52601	0.0105169	0.609765	1.97811		TMEM64				NDUFA5	GLRA1			ERFL	NAA25
sp|Q15904|VAS1_HUMAN	ATP6AP1	VAS1_HUMAN V-type proton ATPase subunit S1	16	470.218	540.182	499.214	503.205	768.854	756.221	776.323	767.133	1.52449	0.000236129	0.608331	3.62685		NSDHL		STMN4		HIGD2A	CLEC4A			CSRNP2	FABP3
sp|Q06055-2|AT5G2_HUMAN	ATP5G2	AT5G2_HUMAN Isoform 2 of ATP synthase F(0) complex subunit C2, mitochondrial	3	102.949	133.906	126.548	121.134	150.739	201.448	201.799	184.662	1.52444	0.0304709	0.60828	1.51611		MOXD1		ST6GALNAC5		HADHA	CLDN5			CREBL2	ENGASE
sp|Q9Y2C4|EXOG_HUMAN	EXOG	EXOG_HUMAN Nuclease EXOG, mitochondrial	5	136.213	151.228	168.835	152.092	214.46	233.298	247.676	231.811	1.52415	0.00407955	0.608003	2.38939							OR2V2			MCM8
sp|P13726|TF_HUMAN	F3	TF_HUMAN Tissue factor	2	60.7986	60.4488	62.1464	61.1313	105.935	67.469	106.088	93.1641	1.524	0.0673928	0.607863	1.17139							OR4A15			MED12L
sp|P63244|GBLP_HUMAN	GNB2L1	GBLP_HUMAN Guanine nucleotide-binding protein subunit beta-2-like 1	7	221.756	133.928	145.919	167.201	249.795	254.528	259.32	254.548	1.52241	0.0341539	0.606352	1.46656							OR8B12			NKX2-8
sp|Q02338|BDH_HUMAN	BDH1	BDH_HUMAN D-beta-hydroxybutyrate dehydrogenase, mitochondrial	4	91.507	105.95	99.8446	99.1007	145.739	154.047	152.82	150.869	1.52238	0.000462107	0.606327	3.33526		PTDSS1		YIPF7		MIEF1	DPP10			DET1	GSTCD
sp|P40121|CAPG_HUMAN	CAPG	CAPG_HUMAN Macrophage-capping protein	7	175.83	128.33	126.718	143.626	233.191	220.432	201.557	218.393	1.52057	0.0157128	0.604609	1.80375		SRD5A2				MT-ATP6	GABRA3			EHF	LNX1
sp|P07225|PROS_HUMAN	PROS1	PROS_HUMAN Vitamin K-dependent protein S	4	129.142	134.608	134.252	132.667	204.37	203.859	196.944	201.725	1.52053	2.04166e-05	0.604575	4.69002										ZNF236
sp|Q9NPH0|PPA6_HUMAN	ACP6	PPA6_HUMAN Lysophosphatidic acid phosphatase type 6	1	16.9622	17.2977	17.9192	17.393	26.6244	24.1828	28.4748	26.4273	1.51942	0.00208894	0.60352	2.68007		COLGALT2		CHST3	DNAJC5	ARMCX6	ANO3	RAB27B		ARNTL2	APAF1	TMEM41	SEC13
sp|Q8WUN7|UBTD2_HUMAN	UBTD2	UBTD2_HUMAN Ubiquitin domain-containing protein 2	1	8.56895	9.22454	7.96908	8.58753	12.1076	14.0388	12.9693	13.0386	1.51831	0.00260452	0.602471	2.58427
sp|O60669|MOT2_HUMAN	SLC16A7	MOT2_HUMAN Monocarboxylate transporter 2	3	151.594	211.219	200.696	187.836	274.612	281.503	297.516	284.544	1.51485	0.00783131	0.599175	2.10617
sp|Q68D91|MBLC2_HUMAN	MBLAC2	MBLC2_HUMAN Metallo-beta-lactamase domain-containing protein 2	7	192.171	190.558	193.612	192.114	262.305	313.41	296.656	290.79	1.51364	0.00281037	0.598017	2.55124							TRAV14DV4			RSF1
sp|Q7L576|CYFP1_HUMAN	CYFIP1	CYFP1_HUMAN Cytoplasmic FMR1-interacting protein 1	1	21.8984	20.8482	20.5314	21.0927	29.6895	35.668	30.3832	31.9136	1.51302	0.00499437	0.597428	2.30152						UQCRQ	LY6H			HMG20B	SULT1E1
sp|Q16698|DECR_HUMAN	DECR1	DECR_HUMAN 2,4-dienoyl-CoA reductase, mitochondrial	20	763.753	953.723	852.631	856.702	1212.6	1333.4	1340.47	1295.49	1.51219	0.00310044	0.596635	2.50858							MUC21			HOXB9	TXNIP
sp|P08670|VIME_HUMAN	VIM	VIME_HUMAN Vimentin	66	2812.62	2353.35	2112.59	2426.19	3164.36	4056.75	3781.05	3667.38	1.51158	0.0206028	0.596062	1.68607
sp|Q9Y5Y0|FLVC1_HUMAN	FLVCR1	FLVC1_HUMAN Feline leukemia virus subgroup C receptor-related protein 1	4	106.259	127.149	117.716	117.042	173.248	173.072	184.377	176.899	1.51142	0.00108621	0.595902	2.96409							OR52E2			MSL3
sp|Q9C0B5|ZDHC5_HUMAN	ZDHHC5	ZDHC5_HUMAN Palmitoyltransferase ZDHHC5	5	50.7624	66.6812	60.5271	59.3235	95.6735	86.7614	86.2998	89.5783	1.51	0.00549615	0.594544	2.25994
sp|O15533-3|TPSN_HUMAN	TAPBP	TPSN_HUMAN Isoform 3 of Tapasin	3	40.5119	44.5134	45.0389	43.3547	68.8179	51.5611	75.9862	65.4551	1.50976	0.0402869	0.594315	1.39484
sp|Q6NYC8|PPR18_HUMAN	PPP1R18	PPR18_HUMAN Phostensin	2	111.615	92.8571	95.4235	99.9652	150.539	158.095	142.738	150.458	1.5051	0.00236091	0.589859	2.62692										ZNF155
sp|P43490|NAMPT_HUMAN	NAMPT	NAMPT_HUMAN Nicotinamide phosphoribosyltransferase	4	166.034	134.108	140.262	146.801	214.157	237.19	211.426	220.924	1.50492	0.00434928	0.58969	2.36158										SUPT5H
sp|Q99808|S29A1_HUMAN	SLC29A1	S29A1_HUMAN Equilibrative nucleoside transporter 1	3	72.5085	99.2195	95.7602	89.1627	136.923	133.106	132.238	134.089	1.50387	0.00617176	0.588677	2.20959
sp|P15104|GLNA_HUMAN	GLUL	GLNA_HUMAN Glutamine synthetase	1	45.0417	41.5225	37.2213	41.2618	53.3138	72.8905	59.894	62.0328	1.50339	0.0282811	0.588224	1.5485							OR7A17			NIPBL
sp|P23381|SYWC_HUMAN	WARS	SYWC_HUMAN Tryptophan--tRNA ligase, cytoplasmic	9	407.466	279.761	265.913	317.713	469.954	514.287	445.983	476.742	1.50054	0.0320991	0.585481	1.49351
sp|P20073|ANXA7_HUMAN	ANXA7	ANXA7_HUMAN Annexin A7	2	42.596	35.4061	30.0494	36.0171	54.1182	60.7999	47.1495	54.0225	1.49991	0.0283439	0.584877	1.54754		FA2H		GOLM1	TSPAN3	COX7C	CD300A			CBX5	CDV3
sp|P32189|GLPK_HUMAN	GK	GLPK_HUMAN Glycerol kinase	5	131.858	151.937	138.38	140.725	200.787	215.023	217.129	210.98	1.49923	0.000853921	0.584224	3.06858							OR6K2			NFKBIL1
sp|Q96CN7|ISOC1_HUMAN	ISOC1	ISOC1_HUMAN Isochorismatase domain-containing protein 1	1	19.964	21.6001	17.7032	19.7558	26.1587	31.83	30.694	29.5609	1.49632	0.00903194	0.581417	2.04422							SLC14A1			POU5F1B
sp|P52294|IMA5_HUMAN	KPNA1	IMA5_HUMAN Importin subunit alpha-5	1	51.4706	48.2149	47.6837	49.1231	66.261	99.0106	55.1131	73.4616	1.49546	0.139582	0.580589	0.855171							SLC47A1			PURG
sp|P09110|THIK_HUMAN	ACAA1	THIK_HUMAN 3-ketoacyl-CoA thiolase, peroxisomal	15	435.148	567.348	582.226	528.241	809.92	714.387	844.611	789.64	1.49485	0.0126779	0.579999	1.89695		AWAT1	TMED9	B4GALNT1	ATP6V1H	ACSS3	ADIPOR1	HGS	NUDT7	ALX4	AHCY	GABARAPL2	LAMTOR1
sp|Q86W42|THOC6_HUMAN	THOC6	THOC6_HUMAN THO complex subunit 6 homolog	2	52.0401	45.7345	58.7839	52.1862	84.5525	78.2438	71.1401	77.9788	1.49424	0.00882209	0.579415	2.05443
sp|Q8NBZ7-2|UXS1_HUMAN	UXS1	UXS1_HUMAN Isoform 2 of UDP-glucuronic acid decarboxylase 1	2	32.8298	35.9521	39.7716	36.1845	51.9699	52.7571	57.2292	53.9854	1.49195	0.00234995	0.577196	2.62894
sp|Q3SY69|AL1L2_HUMAN	ALDH1L2	AL1L2_HUMAN Mitochondrial 10-formyltetrahydrofolate dehydrogenase	4	50.2583	71.9517	62.2846	61.4982	97.8163	83.73	93.0343	91.5269	1.48828	0.0161861	0.57365	1.79086		DNAJB9		GALNT2	PLBD2	CMC1	CACNA1S	VPS26B		BLM	C20orf203
sp|Q01518|CAP1_HUMAN	CAP1	CAP1_HUMAN Adenylyl cyclase-associated protein 1	22	1528.01	1113.6	1117.85	1253.15	1806.77	2101.62	1681.63	1863.34	1.48692	0.0302017	0.572328	1.51997		SQLE				MRS2	FZD9			EGR3	LDLRAP1
sp|Q9P275-2|UBP36_HUMAN	USP36	UBP36_HUMAN Isoform 2 of Ubiquitin carboxyl-terminal hydrolase 36	3	148.894	166.847	165.018	160.253	246.675	234.972	232.286	237.978	1.48501	0.000420924	0.570476	3.3758
sp|P01130|LDLR_HUMAN	LDLR	LDLR_HUMAN Low-density lipoprotein receptor	6	220.194	207.798	202.607	210.2	302.993	323.782	309.414	312.063	1.4846	0.000225836	0.570075	3.64621							SLCO4A1			RBM11
sp|O00468-3|AGRIN_HUMAN	AGRN	AGRIN_HUMAN Isoform 3 of Agrin	9	281.711	348.839	320.906	317.152	472.468	457.51	482.472	470.817	1.48452	0.00178213	0.569992	2.74906		CYP4F2		FAM20B	LAMTOR5	BOLA1	AVPR1A	SNX17		BAHD1	ATXN7L3B
sp|P08754|GNAI3_HUMAN	GNAI3	GNAI3_HUMAN Guanine nucleotide-binding protein G(k) subunit alpha	11	223.865	267.56	251.176	247.534	367.288	380.903	353.973	367.388	1.48419	0.00130611	0.56968	2.88402							OR7E24			NKX2-2
sp|Q9NTJ5|SAC1_HUMAN	SACM1L	SAC1_HUMAN Phosphatidylinositide phosphatase SAC1	19	1035.19	1152.09	1170.72	1119.33	1580.02	1679.52	1719.99	1659.84	1.48289	0.00080885	0.568409	3.09213										ZNF813
sp|P60953|CDC42_HUMAN	CDC42	CDC42_HUMAN Cell division control protein 42 homolog	6	537.629	503.902	430.942	490.824	717.99	742.004	718.938	726.311	1.47978	0.00191425	0.565381	2.718		UGT2B11				NDUFV1	GPR158			FAM124B	NHLRC2
sp|Q9BXB5|OSB10_HUMAN	OSBPL10	OSB10_HUMAN Oxysterol-binding protein-related protein 10	4	107.76	96.1212	93.847	99.2426	151.115	133.983	155.193	146.764	1.47884	0.00366509	0.564463	2.43592										U2AF1L5
sp|Q8TB22-2|SPT20_HUMAN	SPATA20	SPT20_HUMAN Isoform 2 of Spermatogenesis-associated protein 20	1	17.4884	21.581	20.9658	20.0117	27.322	31.7058	29.7497	29.5925	1.47876	0.00596509	0.564385	2.22438
sp|Q92805|GOGA1_HUMAN	GOLGA1	GOGA1_HUMAN Golgin subfamily A member 1	9	317.95	258.075	322.356	299.46	439.81	452.979	435.106	442.632	1.4781	0.00260091	0.563742	2.58487							OR8G3P			NOBOX
sp|P67936-2|TPM4_HUMAN	TPM4	TPM4_HUMAN Isoform 2 of Tropomyosin alpha-4 chain	5	280.251	184.615	264.463	243.11	340.31	416.55	320.381	359.081	1.47703	0.0496038	0.562701	1.30448
sp|Q9HBM0|VEZA_HUMAN	VEZT	VEZA_HUMAN Vezatin	1	17.8873	20.0049	23.2523	20.3815	30.2303	29.893	30.1681	30.0971	1.47669	0.00341391	0.562367	2.46675
sp|Q96LZ7-2|RMD2_HUMAN	RMDN2	RMD2_HUMAN Isoform 2 of Regulator of microtubule dynamics protein 2	1	16.6169	23.4768	18.9024	19.6654	24.9335	30.861	31.2296	29.008	1.47508	0.0311726	0.560796	1.50623										ZNF615
sp|Q9Y6G9|DC1L1_HUMAN	DYNC1LI1	DC1L1_HUMAN Cytoplasmic dynein 1 light intermediate chain 1	1	53.5673	40.5837	39.4073	44.5194	60.5132	77.8431	58.6522	65.6695	1.47508	0.0498654	0.560788	1.3022							OR10J4			KDM2B
sp|Q7Z5G4|GOGA7_HUMAN	GOLGA7	GOGA7_HUMAN Golgin subfamily A member 7	4	72.891	89.8509	72.3162	78.3527	115.833	122.53	108.237	115.533	1.47453	0.00629081	0.560255	2.20129							OR8I2			NOL11
sp|P17612|KAPCA_HUMAN	PRKACA	KAPCA_HUMAN cAMP-dependent protein kinase catalytic subunit alpha	5	268.302	230.348	263.08	253.91	382.7	362.644	374.063	373.135	1.46956	0.000837441	0.555384	3.07705										ZNF221
sp|Q9NX57|RAB20_HUMAN	RAB20	RAB20_HUMAN Ras-related protein Rab-20	1	36.1463	37.6246	38.6017	37.4576	55.856	58.8742	50.0959	54.942	1.46678	0.00281926	0.552654	2.54987										ZNF468
sp|Q8WVX9|FACR1_HUMAN	FAR1	FACR1_HUMAN Fatty acyl-CoA reductase 1	1	26.2932	37.0572	37.1248	33.4917	53.0276	48.9756	45.3331	49.1121	1.46639	0.0209696	0.552273	1.67841							OR4K17			METTL14
sp|P18206|VINC_HUMAN	VCL	VINC_HUMAN Vinculin	53	2385.16	1961.66	1909.97	2085.6	3162.57	3163.39	2844.89	3056.95	1.46574	0.00618821	0.551634	2.20843
sp|Q15043|S39AE_HUMAN	SLC39A14	S39AE_HUMAN Zinc transporter ZIP14	6	187.734	211.703	190.254	196.564	300.171	270.343	293.455	287.989	1.46512	0.0014991	0.551018	2.82417
sp|Q9Y305-4|ACOT9_HUMAN	ACOT9	ACOT9_HUMAN Isoform 4 of Acyl-coenzyme A thioesterase 9, mitochondrial	25	1008.3	1305.3	1296.56	1203.39	1710.11	1761.22	1817.61	1762.98	1.46502	0.00545237	0.550917	2.26341		CLN6		CHST12	CTSO	APOOL	AMER2	RAB14	SLC25A17	ARID5B	ALOXE3	STBD1	RPTOR
sp|P62258|1433E_HUMAN	YWHAE	1433E_HUMAN 14-3-3 protein epsilon	22	1028.06	763.628	819.689	870.458	1231.47	1395.65	1197.07	1274.73	1.46444	0.0161575	0.550345	1.79163
sp|P11182|ODB2_HUMAN	DBT	ODB2_HUMAN Lipoamide acyltransferase component of branched-chain alpha-keto acid dehydrogenase complex, mitochondrial	9	252.341	272.342	249.544	258.076	348.743	384.531	399.738	377.67	1.46341	0.00202763	0.549335	2.69301							MC3R			HNRNPA0	TGM5
sp|Q15642|CIP4_HUMAN	TRIP10	CIP4_HUMAN Cdc42-interacting protein 4	1	41.3651	34.2695	31.2486	35.6277	55.4707	53.0921	47.7768	52.1132	1.46272	0.0118695	0.54865	1.92557
sp|Q16363|LAMA4_HUMAN	LAMA4	LAMA4_HUMAN Laminin subunit alpha-4	1	12.6592	15.7945	13.7752	14.0763	19.709	19.8782	22.1743	20.5872	1.46254	0.00583513	0.548479	2.23395							SLC5A7			RAD17
sp|Q9HC21|TPC_HUMAN	SLC25A19	TPC_HUMAN Mitochondrial thiamine pyrophosphate carrier	8	283.855	371.066	355.446	336.789	472.744	493.993	510.5	492.412	1.46208	0.00581228	0.548021	2.23565
sp|Q9UFN0|NPS3A_HUMAN	NIPSNAP3A	NPS3A_HUMAN Protein NipSnap homolog 3A	6	159.031	183.046	175.655	172.577	244.3	258.996	253.355	252.217	1.46147	0.000656707	0.547423	3.18263										TEP1
sp|P61769|B2MG_HUMAN	B2M	B2MG_HUMAN Beta-2-microglobulin	9	680.532	751.124	804.876	745.511	989.387	1204.6	1073.48	1089.15	1.46095	0.00892161	0.546906	2.04956		PIGC		TPST1		LARS2	CPO			DBP	GALM
sp|P16152|CBR1_HUMAN	CBR1	CBR1_HUMAN Carbonyl reductase [NADPH] 1	8	233.943	211.368	189.877	211.729	287.979	332.392	307.218	309.196	1.46034	0.00573678	0.546304	2.24133		TBXAS1				MTFP1	GFRA2			ELOA3B	MAP3K14
sp|Q8N4Q0|ZADH2_HUMAN	ZADH2	ZADH2_HUMAN Zinc-binding alcohol dehydrogenase domain-containing protein 2	5	186.169	206.037	181.463	191.223	297.178	235.886	304.473	279.179	1.45996	0.0187528	0.545931	1.72693
sp|Q8NBJ9-2|SIDT2_HUMAN	SIDT2	SIDT2_HUMAN Isoform 2 of SID1 transmembrane family member 2	3	62.3671	85.1488	50.2416	65.9191	91.0183	97.782	99.807	96.2024	1.4594	0.0457166	0.545376	1.33993
sp|O15269|SPTC1_HUMAN	SPTLC1	SPTC1_HUMAN Serine palmitoyltransferase 1	7	263.761	318.853	308.929	297.181	448.09	393.313	459.45	433.618	1.4591	0.0067862	0.545082	2.16837
sp|Q14517|FAT1_HUMAN	FAT1	FAT1_HUMAN Protocadherin Fat 1	7	153.558	180.481	164.676	166.238	247.654	243.882	236.063	242.533	1.45895	0.000862013	0.544931	3.06449							OR4P4			MIER3
sp|Q9NWT8|AKIP_HUMAN	AURKAIP1	AKIP_HUMAN Aurora kinase A-interacting protein	1	10.3592	11.0638	14.7398	12.0543	15.6128	18.7439	18.3901	17.5823	1.45859	0.0302375	0.544576	1.51945		PGRMC1		TMEM59L		KMO	CPD			DACH1	FRAT1
sp|Q99536|VAT1_HUMAN	VAT1	VAT1_HUMAN Synaptic vesicle membrane protein VAT-1 homolog	11	529.751	460.244	408.878	466.291	693.002	687.674	657.13	679.269	1.45675	0.00441351	0.542753	2.35522
sp|O14832|PAHX_HUMAN	PHYH	PAHX_HUMAN Phytanoyl-CoA dioxygenase, peroxisomal	1	46.0648	45.4254	55.9531	49.1478	67.9437	73.1147	73.1565	71.4049	1.45286	0.00433043	0.538898	2.36347										ZBTB44
sp|Q86TS9|RM52_HUMAN	MRPL52	RM52_HUMAN 39S ribosomal protein L52, mitochondrial	1	36.5706	74.6818	66.1025	59.1183	75.5208	100.537	80.321	85.4594	1.44557	0.130075	0.531636	0.885806							TTYH1			SNRPC
sp|Q13162|PRDX4_HUMAN	PRDX4	PRDX4_HUMAN Peroxiredoxin-4	16	840.372	1113.25	974.35	975.992	1360.31	1382.36	1489.26	1410.64	1.44534	0.00790589	0.531414	2.10205										ZNF211
sp|Q15843|NEDD8_HUMAN	NEDD8	NEDD8_HUMAN NEDD8	1	32.6875	26.3009	27.9444	28.9776	31.9895	50.6133	42.9808	41.8612	1.44461	0.0879633	0.530675	1.0557										TCEAL7
sp|Q9Y5S2|MRCKB_HUMAN	CDC42BPB	MRCKB_HUMAN Serine/threonine-protein kinase MRCK beta	1	8.74719	8.915	8.58569	8.7493	12.0489	14.4845	11.3664	12.6333	1.44392	0.015054	0.529988	1.82235		UGT2B15				NDUFV2	GPR160			FAM169A	NIT2
sp|Q04656-3|ATP7A_HUMAN	ATP7A	ATP7A_HUMAN Isoform 2 of Copper-transporting ATPase 1	12	371.538	438.3	419.491	409.777	642.234	512.417	620.171	591.607	1.44373	0.015318	0.529802	1.8148		P4HA3		TMED10		IDH2	CNNM3			CTDSPL	FBXO4
sp|Q96HH9-3|GRAM3_HUMAN	GRAMD3	GRAM3_HUMAN Isoform 3 of GRAM domain-containing protein 3	1	9.30663	10.8135	13.1406	11.0869	16.0679	15.0198	16.9177	16.0018	1.44331	0.0167579	0.529377	1.77578							P2RY4			NR5A1
sp|P61981|1433G_HUMAN	YWHAG	1433G_HUMAN 14-3-3 protein gamma	6	221.063	174.467	194.19	196.573	272.007	293.26	285.684	283.65	1.44298	0.00424033	0.529047	2.3726
sp|P07947|YES_HUMAN	YES1	YES_HUMAN Tyrosine-protein kinase Yes	8	189.62	200.708	200.482	196.937	280.99	287.138	281.166	283.098	1.43751	3.27127e-05	0.52357	4.48528
sp|Q8IW52|SLIK4_HUMAN	SLITRK4	SLIK4_HUMAN SLIT and NTRK-like protein 4	3	53.2722	65.5164	60.9068	59.8985	90.1294	86.6035	81.3128	86.0152	1.43602	0.00402061	0.522073	2.39571
sp|Q9UBQ6|EXTL2_HUMAN	EXTL2	EXTL2_HUMAN Exostosin-like 2	5	106.412	112.591	107.225	108.742	150.615	161.635	156.141	156.13	1.43578	0.000219989	0.521836	3.6576							OR3A1			MED1
sp|O60507|TPST1_HUMAN	TPST1	TPST1_HUMAN Protein-tyrosine sulfotransferase 1	1	43.1144	45.2395	43.7673	44.0404	63.4437	63.884	62.3088	63.2122	1.43532	1.66195e-05	0.521375	4.77938
sp|O15020|SPTN2_HUMAN	SPTBN2	SPTN2_HUMAN Spectrin beta chain, non-erythrocytic 2	13	323.388	376.371	379.826	359.862	493.925	533.755	521.046	516.242	1.43456	0.00197062	0.520605	2.7054
sp|Q96HY6|DDRGK_HUMAN	DDRGK1	DDRGK_HUMAN DDRGK domain-containing protein 1	8	229.722	262.235	316.797	269.585	359.948	392.669	406.635	386.418	1.43338	0.0156177	0.519421	1.80638							MFSD4B			HOMEZ	TPT1
sp|Q99436|PSB7_HUMAN	PSMB7	PSB7_HUMAN Proteasome subunit beta type-7	3	154.236	118.156	117.822	130.071	193.477	171.265	194.485	186.409	1.43313	0.0168155	0.51917	1.77429										ZNF286A
sp|Q9NRK6|ABCBA_HUMAN	ABCB10	ABCBA_HUMAN ATP-binding cassette sub-family B member 10, mitochondrial	5	162.321	189.464	191.138	180.974	261.256	248.41	266.153	258.606	1.42897	0.00193899	0.514973	2.71243		ALG1	GORASP1	ARFIP1	ARSG	ACAD8	ABHD2	CCDC93	AGPS	ADARB1	ACAT2	ATG3	ATP6V1A	CHMP7
sp|P09382|LEG1_HUMAN	LGALS1	LEG1_HUMAN Galectin-1	10	539.401	601.353	687.478	609.411	956.588	741.362	911.571	869.84	1.42735	0.0292732	0.513336	1.53353							SMIM23			RBM34
sp|O75381|PEX14_HUMAN	PEX14	PEX14_HUMAN Peroxisomal membrane protein PEX14	12	296.408	310.66	375.188	327.419	507.685	357.017	536.443	467.048	1.42646	0.0828686	0.512435	1.08161										YPEL4
sp|Q14141|SEPT6_HUMAN	SEPT6	SEPT6_HUMAN Septin-6	1	21.8583	17.77	19.562	19.7301	28.2622	27.7477	28.4196	28.1432	1.42641	0.00218245	0.512385	2.66105
sp|P43034|LIS1_HUMAN	PAFAH1B1	LIS1_HUMAN Platelet-activating factor acetylhydrolase IB subunit alpha	7	268.897	220.804	230.595	240.099	330.865	351.861	343.372	342.033	1.42455	0.00303506	0.510506	2.51783										USF1
sp|P62834|RAP1A_HUMAN	RAP1A	RAP1A_HUMAN Ras-related protein Rap-1A	9	428.092	531.121	475.035	478.083	752.629	620.781	669.472	680.961	1.42436	0.0140468	0.510311	1.85242										ZNF534
sp|P04156|PRIO_HUMAN	PRNP	PRIO_HUMAN Major prion protein	3	251.311	261.178	253.261	255.25	384.12	334.776	371.769	363.555	1.42431	0.00201491	0.510261	2.69574										ZNF234
sp|Q9BQE4|SELS_HUMAN	VIMP	SELS_HUMAN Selenoprotein S	3	86.4559	105.116	110.125	100.566	136.049	140.362	153.286	143.232	1.42427	0.00858497	0.51022	2.06626
sp|O75751|S22A3_HUMAN	SLC22A3	S22A3_HUMAN Solute carrier family 22 member 3	2	41.3381	54.4482	55.433	50.4064	71.802	74.1482	69.2972	71.7491	1.42341	0.0109112	0.509354	1.96213
sp|Q9Y4F4|F179B_HUMAN	FAM179B	F179B_HUMAN Protein FAM179B	1	53.5318	46.1813	18.3944	39.3692	70.8171	62.8885	34.239	55.9815	1.42196	0.342094	0.507884	0.465855							OR4D5			MED7
sp|Q5VIR6-4|VPS53_HUMAN	VPS53	VPS53_HUMAN Isoform 4 of Vacuolar protein sorting-associated protein 53 homolog	1	21.4446	22.1309	20.8184	21.4646	31.6998	29.9248	29.9338	30.5195	1.42185	0.000207647	0.507769	3.68267
sp|Q6UW02|CP20A_HUMAN	CYP20A1	CP20A_HUMAN Cytochrome P450 20A1	3	74.6148	89.8035	80.3741	81.5975	114.065	122.983	110.538	115.862	1.41992	0.00403661	0.505809	2.39398						VARS2	LY9			HMGA2	SULT4A1
sp|O75054|IGSF3_HUMAN	IGSF3	IGSF3_HUMAN Immunoglobulin superfamily member 3	14	435.801	579.76	522.049	512.537	748.938	699.995	731.676	726.87	1.41818	0.00835494	0.504042	2.07806							SCN4A			POLR1C
sp|Q9Y5U9|IR3IP_HUMAN	IER3IP1	IR3IP_HUMAN Immediate early response 3-interacting protein 1	2	81.8349	74.9093	98.4788	85.0743	98.4468	124.9	138.303	120.55	1.417	0.0599826	0.502836	1.22197							S1PR4			POLH
sp|P42356|PI4KA_HUMAN	PI4KA	PI4KA_HUMAN Phosphatidylinositol 4-kinase alpha	1	26.9808	30.077	25.1757	27.4112	39.2945	39.0082	38.2218	38.8415	1.41699	0.00146219	0.502834	2.835										ZBTB47
sp|Q9Y2V2|CHSP1_HUMAN	CARHSP1	CHSP1_HUMAN Calcium-regulated heat stable protein 1	1	32.1305	25.9104	18.3939	25.4783	36.0143	38.0883	34.1688	36.0905	1.41652	0.061989	0.502349	1.20769		STIMATE				MT-ND4	GABRP			ELF5	LTA4H
sp|Q9P2C4|TM181_HUMAN	TMEM181	TM181_HUMAN Transmembrane protein 181	4	118.894	126.426	112.366	119.228	168.269	165.187	172.924	168.793	1.41571	0.000436232	0.50153	3.36028
sp|Q9BY32|ITPA_HUMAN	ITPA	ITPA_HUMAN Inosine triphosphate pyrophosphatase	3	84.9028	77.2717	88.2051	83.4599	120.656	117.605	116.19	118.15	1.41565	0.000578768	0.501468	3.2375							SLC1A6			PRCC
sp|Q6NUQ1|RINT1_HUMAN	RINT1	RINT1_HUMAN RAD50-interacting protein 1	1	8.2061	10.6817	10.2736	9.72045	13.3705	12.0812	15.8278	13.7598	1.41556	0.0393518	0.501368	1.40504										ZNF613
sp|A0AVT1|UBA6_HUMAN	UBA6	UBA6_HUMAN Ubiquitin-like modifier-activating enzyme 6	3	48.5392	44.5975	46.6839	46.6069	71.9689	68.0598	57.806	65.9449	1.41492	0.0114988	0.500718	1.93935
sp|Q9NPF0|CD320_HUMAN	CD320	CD320_HUMAN CD320 antigen	5	260.049	274.636	254.756	263.147	362.302	381.693	372.725	372.24	1.41457	0.000181772	0.500364	3.74047		TRIQK				NDUFB10	GPIHBP1			ETAA1	NBPF20
sp|Q14244|MAP7_HUMAN	MAP7	MAP7_HUMAN Ensconsin	1	60.5907	46.2245	40.7969	49.204	74.1501	64.1512	70.3599	69.5537	1.41358	0.0365638	0.499351	1.43695							TRA			RPP40
sp|Q9P2W9|STX18_HUMAN	STX18	STX18_HUMAN Syntaxin-18	3	129.947	146.07	161.86	145.959	202.609	200.846	215.48	206.312	1.41349	0.00423833	0.499262	2.37281
sp|Q9ULV4-3|COR1C_HUMAN	CORO1C	COR1C_HUMAN Isoform 3 of Coronin-1C	4	218.809	170.897	202.899	197.535	280.595	285.423	269.965	278.661	1.41069	0.00540664	0.496403	2.26707						SLC8B1	KCNK4			GTF3C6	RNF213
sp|Q16563|SYPL1_HUMAN	SYPL1	SYPL1_HUMAN Synaptophysin-like protein 1	8	338.825	311.34	331.63	327.265	496.072	498.267	390.602	461.647	1.41062	0.0211137	0.496331	1.67544
sp|Q93008|USP9X_HUMAN	USP9X	USP9X_HUMAN Probable ubiquitin carboxyl-terminal hydrolase FAF-X	4	105.731	98.5477	90.455	98.2446	148.559	127.49	139.683	138.577	1.41053	0.00587358	0.49624	2.2311
sp|Q6UN15|FIP1_HUMAN	FIP1L1	FIP1_HUMAN Pre-mRNA 3'-end-processing factor FIP1	1	18.4354	16.3259	19.7366	18.166	30.1591	21.4321	25.2091	25.6001	1.40923	0.0520167	0.494909	1.28386							OR51H1			MNX1
sp|P62826|RAN_HUMAN	RAN	RAN_HUMAN GTP-binding nuclear protein Ran	4	167.071	161.046	157.005	161.707	226.408	229.618	227.617	227.881	1.40922	2.7422e-05	0.494896	4.5619										ZNF527
sp|Q9ULI3|HEG1_HUMAN	HEG1	HEG1_HUMAN Protein HEG homolog 1	2	56.2397	53.0782	53.93	54.416	84.6587	65.5699	79.7233	76.6507	1.40861	0.0185409	0.494269	1.73187							PCDHGA10			OTP
sp|Q13724|MOGS_HUMAN	MOGS	MOGS_HUMAN Mannosyl-oligosaccharide glucosidase	9	216.422	268.998	285.758	257.059	338.67	371.549	375.659	361.959	1.40808	0.0118629	0.493727	1.92581							TRBV29-1			SHLD2
sp|P25789|PSA4_HUMAN	PSMA4	PSA4_HUMAN Proteasome subunit alpha type-4	10	339.403	265.963	278.226	294.531	425.141	419.611	399.164	414.639	1.4078	0.00752029	0.493437	2.12377										ZNF28
sp|O00220|TR10A_HUMAN	TNFRSF10A	TR10A_HUMAN Tumor necrosis factor receptor superfamily member 10A	1	19.5505	26.1926	18.5311	21.4248	32.7156	29.8448	27.9204	30.1603	1.40773	0.0346522	0.49337	1.46027
sp|P17302|CXA1_HUMAN	GJA1	CXA1_HUMAN Gap junction alpha-1 protein	4	96.8427	105.158	97.9453	99.9819	135.063	143.141	143.423	140.543	1.40568	0.000428833	0.491269	3.36771							OR6J1			NFKBID
sp|Q15119|PDK2_HUMAN	PDK2	PDK2_HUMAN [Pyruvate dehydrogenase (acetyl-transferring)] kinase isozyme 2, mitochondrial	1	16.6696	17.6611	21.2972	18.5426	24.101	24.6007	29.4703	26.0573	1.40527	0.0275109	0.490843	1.56049										WWP2
sp|O43865|SAHH2_HUMAN	AHCYL1	SAHH2_HUMAN Putative adenosylhomocysteinase 2	6	260.479	269.026	242.906	257.47	369.948	382.86	332.455	361.755	1.40504	0.00354799	0.490606	2.45002		CYP4X1		FUT1	LIPA	C14orf119	BDKRB1	SNX21		BARX1	BBOX1
sp|P62937|PPIA_HUMAN	PPIA	PPIA_HUMAN Peptidyl-prolyl cis-trans isomerase A	14	566.346	591.859	528.069	562.091	828.158	683.637	856.128	789.308	1.40423	0.0159118	0.489783	1.79828										ZNF121
sp|P53701|CCHL_HUMAN	HCCS	CCHL_HUMAN Cytochrome c-type heme lyase	13	392.601	465.738	493.364	450.568	596.946	624.156	676.658	632.587	1.40398	0.00878463	0.48952	2.05628							PCDHB18P			ONECUT2
sp|P22102|PUR2_HUMAN	GART	PUR2_HUMAN Trifunctional purine biosynthetic protein adenosine-3	15	563.389	430.076	409.014	467.493	670.3	676.069	620.622	655.664	1.40251	0.0216129	0.488012	1.66529							OR5H6			NCAPD3
sp|Q9Y287|ITM2B_HUMAN	ITM2B	ITM2B_HUMAN Integral membrane protein 2B	3	89.497	84.9496	86.8747	87.1071	108.54	129.512	128.014	122.022	1.40083	0.00711417	0.486282	2.14788							SLC1A5			PRAC2
sp|Q8NFA0|UBP32_HUMAN	USP32	UBP32_HUMAN Ubiquitin carboxyl-terminal hydrolase 32	1	20.3114	18.5598	19.5318	19.4677	23.0316	29.8221	28.824	27.2259	1.39852	0.023495	0.483898	1.62903
sp|P67936|TPM4_HUMAN	TPM4	TPM4_HUMAN Tropomyosin alpha-4 chain	4	187.179	136.212	162.465	161.952	223.075	259.629	196.286	226.33	1.39751	0.0521053	0.482862	1.28312
sp|Q9P0T7|TMEM9_HUMAN	TMEM9	TMEM9_HUMAN Transmembrane protein 9	2	28.3108	35.8798	27.2214	30.4707	46.3304	41.8263	39.5056	42.5541	1.39656	0.0232816	0.481876	1.63299
sp|Q9NXU5|ARL15_HUMAN	ARL15	ARL15_HUMAN ADP-ribosylation factor-like protein 15	3	76.2712	83.1376	85.3436	81.5841	111.608	118.264	111.916	113.929	1.39647	0.000752344	0.48178	3.12358		HSD17B11		MPPE1		ECHS1	CDH9			CEBPD	DDT
sp|P48681|NEST_HUMAN	NES	NEST_HUMAN Nestin	2	43.5766	55.2491	59.2272	52.6843	77.1812	67.3181	76.16	73.5531	1.39611	0.0208886	0.481413	1.68009										TCF20
sp|P41250|SYG_HUMAN	GARS	SYG_HUMAN Glycine--tRNA ligase	22	1053.65	1285.74	1165.17	1168.19	1633.16	1580.25	1676.18	1629.86	1.39521	0.00312319	0.48048	2.5054							OR5H2			NBN
sp|A8MX76|CAN14_HUMAN	CAPN14	CAN14_HUMAN Calpain-14	2	85.3302	107.066	44.1903	78.862	130.814	134.006	65.1863	110.002	1.39487	0.343849	0.480127	0.463632		SRPRA				MT-CO1	GABRA5			EHMT2	LRCH1
sp|Q9ULH0|KDIS_HUMAN	KIDINS220	KDIS_HUMAN Kinase D-interacting substrate of 220 kDa	8	109.527	135.455	121.653	122.212	179.418	168.744	162.856	170.339	1.3938	0.00571277	0.479027	2.24315							SLC38A3			PRR14
sp|Q7Z2K6|ERMP1_HUMAN	ERMP1	ERMP1_HUMAN Endoplasmic reticulum metallopeptidase 1	30	1186.23	1451.94	1282.36	1306.85	1848.95	1717	1897.69	1821.21	1.39359	0.00555035	0.47881	2.25568							OR2M7			MATR3
sp|O96019|ACL6A_HUMAN	ACTL6A	ACL6A_HUMAN Actin-like protein 6A	1	31.2101	31.0553	33.0491	31.7715	50.4009	43.2834	39.1431	44.2758	1.39357	0.0202369	0.478785	1.69386		CYP17A1		CHSY1	FUCA1	ATP5F1D	AOC3	RAB9A		ASCL3	APOL6	UVRAG	SLC7A5
sp|Q6IBS0|TWF2_HUMAN	TWF2	TWF2_HUMAN Twinfilin-2	1	53.5908	33.2039	40.5115	42.4354	56.9198	66.9485	53.4809	59.1164	1.39309	0.081505	0.478291	1.08882
sp|P62745|RHOB_HUMAN	RHOB	RHOB_HUMAN Rho-related GTP-binding protein RhoB	4	99.8281	96.9712	93.8013	96.8668	135.388	138.269	130.972	134.876	1.39239	0.000157604	0.477564	3.80243										ZNF605
sp|O00161|SNP23_HUMAN	SNAP23	SNP23_HUMAN Synaptosomal-associated protein 23	16	574.316	609.91	599.163	594.463	831.934	834.005	815.386	827.108	1.39135	4.27788e-05	0.47649	4.36877
sp|P63010-2|AP2B1_HUMAN	AP2B1	AP2B1_HUMAN Isoform 2 of AP-2 complex subunit beta	25	1004.38	1068.52	1054.58	1042.49	1403.46	1480.31	1466.71	1450.16	1.39105	0.000184943	0.476173	3.73296		FITM1		GORASP1		CPT2	CD320			CCDC110	CIAO2A
sp|P50443|S26A2_HUMAN	SLC26A2	S26A2_HUMAN Sulfate transporter	2	46.4183	54.5382	53.4821	51.4795	66.894	74.3513	73.4613	71.5689	1.39024	0.00441437	0.475334	2.35513
sp|Q8NBJ5|GT251_HUMAN	COLGALT1	GT251_HUMAN Procollagen galactosyltransferase 1	31	1779.06	2574.3	2257.96	2203.78	2959.3	2747.4	3482.49	3063.07	1.38992	0.0539957	0.474999	1.26764						SLC25A30	ITGB8			GSC2	RALGAPA2
sp|P50148|GNAQ_HUMAN	GNAQ	GNAQ_HUMAN Guanine nucleotide-binding protein G(q) subunit alpha	2	48.8995	50.493	47.381	48.9245	70.9111	69.1971	63.8789	67.9957	1.38981	0.00115455	0.474887	2.93759							OR7G2			NKX2-4
sp|Q03519|TAP2_HUMAN	TAP2	TAP2_HUMAN Antigen peptide transporter 2	10	301.105	326.686	325.77	317.854	447.83	437.832	439.136	441.6	1.38932	0.000158387	0.474376	3.80028
sp|Q9HD26|GOPC_HUMAN	GOPC	GOPC_HUMAN Golgi-associated PDZ and coiled-coil motif-containing protein	1	66.5108	29.4831	50.5608	48.8516	66.2989	69.6174	67.4018	67.7727	1.38732	0.153707	0.4723	0.813308							OR8S1			NOL9
sp|Q9UHD1|CHRD1_HUMAN	CHORDC1	CHRD1_HUMAN Cysteine and histidine-rich domain-containing protein 1	1	17.7483	16.9914	14.5768	16.4388	23.2386	23.3078	21.7978	22.7814	1.38583	0.00413635	0.470748	2.38338						PLD6	GRIN1			FOXD4L5	PANK4
sp|Q9NRF8|PYRG2_HUMAN	CTPS2	PYRG2_HUMAN CTP synthase 2	1	7.55678	8.49277	8.98481	8.34479	12.4571	11.2546	10.9799	11.5639	1.38576	0.00645394	0.470677	2.19017						TRAP1	LPAR3			HILS1	SPRR2B
sp|Q08AM6|VAC14_HUMAN	VAC14	VAC14_HUMAN Protein VAC14 homolog	1	81.2251	63.0303	60.5913	68.2822	92.8643	104.573	86.4093	94.6155	1.38565	0.0350755	0.470566	1.455
sp|Q8NC60|NOA1_HUMAN	NOA1	NOA1_HUMAN Nitric oxide-associated protein 1	1	67.8769	47.3626	53.6203	56.2866	87.7161	71.02	75.1778	77.9713	1.38526	0.0511984	0.470152	1.29074										TFAP2D
sp|Q8TD30|ALAT2_HUMAN	GPT2	ALAT2_HUMAN Alanine aminotransferase 2	4	76.1348	91.9587	95.4425	87.8453	126.878	107.833	129.836	121.516	1.38329	0.0208421	0.468108	1.68106							P2RY11			NR2E3
sp|O15511-2|ARPC5_HUMAN	ARPC5	ARPC5_HUMAN Isoform 2 of Actin-related protein 2/3 complex subunit 5	5	268.221	167.552	194.444	210.072	280.666	298.599	292.13	290.465	1.38269	0.0580728	0.467481	1.23603		JKAMP		RER1		FASTKD3	CHRM4			CENPX	DPPA5
sp|O60518|RNBP6_HUMAN	RANBP6	RNBP6_HUMAN Ran-binding protein 6	6	292.275	321.919	300.355	304.85	415.731	418.713	429.881	421.442	1.38246	0.000290501	0.467235	3.53685										ZNF530
sp|Q9NVH0|EXD2_HUMAN	EXD2	EXD2_HUMAN Exonuclease 3'-5' domain-containing protein 2	3	79.475	96.4936	97.5628	91.1771	124.488	121.978	131.197	125.888	1.38069	0.00583774	0.465394	2.23375							OR2T4			MCM10
sp|Q9UG56|PISD_HUMAN	PISD	PISD_HUMAN Phosphatidylserine decarboxylase proenzyme	1	11.6089	16.6591	12.0599	13.4426	19.0337	19.5999	16.8946	18.5094	1.37692	0.0489717	0.461442	1.31006										ZC3H10
sp|Q9Y2A7-2|NCKP1_HUMAN	NCKAP1	NCKP1_HUMAN Isoform 2 of Nck-associated protein 1	4	123.867	102.204	101.289	109.12	150.344	162.135	138.185	150.221	1.37666	0.0152885	0.461174	1.81564										TADA2A
sp|Q8WVC6|DCAKD_HUMAN	DCAKD	DCAKD_HUMAN Dephospho-CoA kinase domain-containing protein	1	22.24	28.7149	27.2418	26.0656	36.8061	33.8153	37.0021	35.8745	1.37632	0.0114229	0.460814	1.94222							MCHR1			HNRNPCL1	THTPA
sp|Q04941|PLP2_HUMAN	PLP2	PLP2_HUMAN Proteolipid protein 2	1	107.115	77.6794	120.508	101.767	90.9834	160.119	169.05	140.051	1.37619	0.239436	0.460674	0.62081										ZFP62
sp|O00629|IMA3_HUMAN	KPNA4	IMA3_HUMAN Importin subunit alpha-3	3	102.903	89.6823	99.1677	97.2512	142.171	134.476	124.479	133.709	1.37488	0.00485053	0.459304	2.31421							SLC4A1			PUS7
sp|P62140|PP1B_HUMAN	PPP1CB	PP1B_HUMAN Serine/threonine-protein phosphatase PP1-beta catalytic subunit	4	92.4089	78.6252	76.656	82.5634	122.979	108.707	108.856	113.514	1.37487	0.0106849	0.459292	1.97123										ZNF146
sp|Q5JTJ3-2|COA6_HUMAN	COA6	COA6_HUMAN Isoform 2 of Cytochrome c oxidase assembly factor 6 homolog	3	168.065	247.218	207.024	207.436	188.983	399.985	266.568	285.178	1.37478	0.302328	0.459201	0.519521						SLC25A15	IL18RAP			GMCL2	PRDX2
sp|Q8IZL8-2|PELP1_HUMAN	PELP1	PELP1_HUMAN Isoform 2 of Proline-, glutamic acid- and leucine-rich protein 1	5	199.946	234.008	245.404	226.453	356.648	281.211	295.383	311.081	1.37371	0.0345527	0.458079	1.46152										YEATS4
sp|Q9NQS3|PVRL3_HUMAN	PVRL3	PVRL3_HUMAN Poliovirus receptor-related protein 3	1	21.2958	32.8687	29.9161	28.0268	37.0387	39.5903	38.8075	38.4788	1.37293	0.0423118	0.457256	1.37354										ZNF419
sp|Q92598|HS105_HUMAN	HSPH1	HS105_HUMAN Heat shock protein 105 kDa	2	51.4623	37.9842	38.2634	42.57	57.3182	61.6273	56.38	58.4418	1.37284	0.0284452	0.457166	1.54599							RHEX			PLSCR2
sp|Q8TDW0|LRC8C_HUMAN	LRRC8C	LRC8C_HUMAN Leucine-rich repeat-containing protein 8C	4	40.4717	53.6547	48.9986	47.7083	60.2958	65.9079	69.8351	65.3463	1.3697	0.0205933	0.453863	1.68627							TCAF2			RING1
sp|P01111|RASN_HUMAN	NRAS	RASN_HUMAN GTPase NRas	6	406.64	373.368	378.051	386.02	523.536	531.618	529.438	528.197	1.36832	0.000183717	0.452403	3.73585										TINF2
sp|P27348|1433T_HUMAN	YWHAQ	1433T_HUMAN 14-3-3 protein theta	6	315.066	244.594	225.72	261.794	355.742	374.616	343.746	358.035	1.36762	0.0282768	0.451668	1.54857
sp|Q10469|MGAT2_HUMAN	MGAT2	MGAT2_HUMAN Alpha-1,6-mannosyl-glycoprotein 2-beta-N-acetylglucosaminyltransferase	2	56.9429	62.4607	55.0327	58.1454	81.4177	80.0547	77.0073	79.4932	1.36714	0.00116524	0.451166	2.93358							TRBJ1-5			SENP5
sp|P21397|AOFA_HUMAN	MAOA	AOFA_HUMAN Amine oxidase [flavin-containing] A	6	103.188	117.526	107.885	109.533	159.532	136.768	152.645	149.648	1.36624	0.00725831	0.450215	2.13916							TMPRSS7			RPF1
sp|Q7L1W4|LRC8D_HUMAN	LRRC8D	LRC8D_HUMAN Leucine-rich repeat-containing protein 8D	2	54.9123	70.0726	69.8448	64.9432	91.3303	70.8345	104.013	88.726	1.36621	0.0943307	0.450178	1.02535							TDGF1P3			RIOX1
sp|Q9BXS9|S26A6_HUMAN	SLC26A6	S26A6_HUMAN Solute carrier family 26 member 6	3	71.7521	104.525	83.8314	86.7029	118.307	124.674	112.269	118.416	1.36577	0.0360843	0.449717	1.44268
sp|Q96AX1|VP33A_HUMAN	VPS33A	VP33A_HUMAN Vacuolar protein sorting-associated protein 33A	2	54.4398	47.307	49.8568	50.5345	66.9501	77.1586	62.938	69.0156	1.36571	0.0173069	0.449653	1.76178
sp|Q16822|PCKGM_HUMAN	PCK2	PCKGM_HUMAN Phosphoenolpyruvate carboxykinase [GTP], mitochondrial	28	1245.02	1630.8	1481.52	1452.45	2010.13	1770.74	2168.84	1983.24	1.36544	0.0301666	0.44937	1.52047										VGLL2
sp|Q8IY17-4|PLPL6_HUMAN	PNPLA6	PLPL6_HUMAN Isoform 4 of Neuropathy target esterase	11	394.219	501.563	448.613	448.132	647.229	553.829	631.754	610.937	1.3633	0.0184268	0.447102	1.73455										ZIC4
sp|Q8NE01|CNNM3_HUMAN	CNNM3	CNNM3_HUMAN Metal transporter CNNM3	9	234.312	273.03	251.841	253.061	335.306	350.879	348.522	344.902	1.36292	0.001666	0.4467	2.77833						SFXN2	IFITM1			GCFC2	PPIC
sp|Q14573|ITPR3_HUMAN	ITPR3	ITPR3_HUMAN Inositol 1,4,5-trisphosphate receptor type 3	48	2141.98	2657.95	2501.25	2433.73	3185.35	3185.69	3573.98	3315.01	1.36211	0.0116791	0.445843	1.93259							SLC22A11			PRDM13
sp|P46937-9|YAP1_HUMAN	YAP1	YAP1_HUMAN Isoform 9 of Yorkie homolog	4	108.785	67.725	79.7681	85.4259	116.736	119.498	112.696	116.31	1.36153	0.0666389	0.445229	1.17627
sp|Q8TAA9|VANG1_HUMAN	VANGL1	VANG1_HUMAN Vang-like protein 1	4	153.175	201.87	188.121	181.055	249.933	236.178	253.102	246.404	1.36093	0.0132179	0.444597	1.87884
sp|P10301|RRAS_HUMAN	RRAS	RRAS_HUMAN Ras-related protein R-Ras	5	370.697	423.185	357.864	383.915	565.891	449.97	550.129	521.997	1.35967	0.0290398	0.443253	1.53701										ZNF768
sp|Q86WA8|LONP2_HUMAN	LONP2	LONP2_HUMAN Lon protease homolog 2, peroxisomal	1	20.7288	16.9986	27.6737	21.8004	30.7632	26.2267	31.8532	29.6143	1.35843	0.0938802	0.441943	1.02743							TACR3			RERE
sp|Q7L4E1|FA73B_HUMAN	FAM73B	FA73B_HUMAN Protein FAM73B	1	23.8809	32.1449	35.1684	30.398	39.0904	40.1047	44.6785	41.2912	1.35835	0.0451415	0.441855	1.34542							OR4K1			MESP1
sp|Q9Y3B8|ORN_HUMAN	REXO2	ORN_HUMAN Oligoribonuclease, mitochondrial	5	161.536	194.758	205.728	187.341	248.985	269.203	245.143	254.444	1.35819	0.0116571	0.441683	1.93341										ZNF587
sp|P43353|AL3B1_HUMAN	ALDH3B1	AL3B1_HUMAN Aldehyde dehydrogenase family 3 member B1	3	38.5357	36.1339	34.8302	36.4999	52.4234	44.0964	52.0907	49.5368	1.35718	0.011255	0.440609	1.94866		DNASE1L1		GALNT6	PSAP	COA1	CACNG6	VPS33B		BOP1	CA7
sp|P49792|RBP2_HUMAN	RANBP2	RBP2_HUMAN E3 SUMO-protein ligase RanBP2	56	1975.97	2247.29	2435.23	2219.5	3401.06	2519.17	3103.56	3007.93	1.35523	0.0537368	0.438538	1.26973										ZNF529
sp|Q12888-2|TP53B_HUMAN	TP53BP1	TP53B_HUMAN Isoform 2 of Tumor suppressor p53-binding protein 1	3	41.5695	34.7664	43.0248	39.7869	53.1232	57.2479	51.2954	53.8888	1.35444	0.0103638	0.437693	1.98448
sp|O75521|ECI2_HUMAN	ECI2	ECI2_HUMAN Enoyl-CoA delta isomerase 2, mitochondrial	8	336.068	401.151	414.518	383.912	510.653	492.59	556.668	519.97	1.3544	0.0115832	0.437653	1.93617							OR11G2			KHDRBS2
sp|Q9P291|ARMX1_HUMAN	ARMCX1	ARMX1_HUMAN Armadillo repeat-containing X-linked protein 1	1	80.0474	82.7783	77.8665	80.2307	104.117	113.623	108.119	108.619	1.35384	0.0007895	0.437056	3.10265		IKBIP		PACS1		EXD2	CELSR1			CENPL	DLEC1
sp|Q8N0X4|CLYBL_HUMAN	CLYBL	CLYBL_HUMAN Citrate lyase subunit beta-like protein, mitochondrial	6	94.0527	125.606	112.37	110.676	147.747	160.155	141.606	149.836	1.35383	0.0212665	0.437042	1.6723						SDHAF3	HTR5A			GATA5	PPIAL4A
sp|P43007|SATT_HUMAN	SLC1A4	SATT_HUMAN Neutral amino acid transporter A	5	125.906	186.447	140.461	150.938	213.532	199.545	199.854	204.311	1.35361	0.0470523	0.436808	1.32742
sp|P12081|SYHC_HUMAN	HARS	SYHC_HUMAN Histidine--tRNA ligase, cytoplasmic	6	217.545	204.031	212.991	211.523	282.755	303.23	272.432	286.139	1.35276	0.00164873	0.435903	2.78285							PCDHB1			NVL
sp|A2RRP1|NBAS_HUMAN	NBAS	NBAS_HUMAN Neuroblastoma-amplified sequence	3	65.1393	80.2514	80.5726	75.3211	105.28	93.9306	106.298	101.836	1.35203	0.0147419	0.435123	1.83145										SYCE2
sp|Q96I59|SYNM_HUMAN	NARS2	SYNM_HUMAN Probable asparagine--tRNA ligase, mitochondrial	5	200.42	242.601	245.293	229.438	293.172	317.285	319.266	309.908	1.35073	0.00867029	0.433736	2.06197										SUZ12
sp|P01137|TGFB1_HUMAN	TGFB1	TGFB1_HUMAN Transforming growth factor beta-1	1	12.8198	19.7185	14.323	15.6204	23.2483	18.4522	21.5095	21.07	1.34887	0.0966451	0.431755	1.01482
sp|O95831|AIFM1_HUMAN	AIFM1	AIFM1_HUMAN Apoptosis-inducing factor 1, mitochondrial	51	2476.89	3233.89	2953.42	2888.07	4033.99	3576.43	4073.86	3894.76	1.34857	0.0209553	0.431429	1.67871		CYP7B1		FUT3	MANBA	CARS2	BEST3	SNX4		BAZ1A	BCDIN3D
sp|Q9UPN3|MACF1_HUMAN	MACF1	MACF1_HUMAN Microtubule-actin cross-linking factor 1, isoforms 1/2/3/5	12	316.607	317.002	304.862	312.824	419.542	427.428	413.062	420.011	1.34264	4.89001e-05	0.425076	4.31069							TMEM106A			RNF2
sp|Q9P246|STIM2_HUMAN	STIM2	STIM2_HUMAN Stromal interaction molecule 2	1	9.14266	9.48056	10.6324	9.75187	13.7149	11.5337	14.0226	13.0904	1.34235	0.0209568	0.424757	1.67867
sp|Q5T440|CAF17_HUMAN	IBA57	CAF17_HUMAN Putative transferase CAF17, mitochondrial	3	51.8405	62.3746	59.1008	57.772	74.5257	78.5427	79.4621	77.5102	1.34166	0.00467783	0.424016	2.32996							RTL8C			PNO1
sp|Q96QE5|TEFM_HUMAN	TEFM	TEFM_HUMAN Transcription elongation factor, mitochondrial	1	11.408	9.78181	15.4501	12.2133	16.0458	15.5383	17.484	16.356	1.3392	0.0808332	0.421366	1.09241
sp|O00116|ADAS_HUMAN	AGPS	ADAS_HUMAN Alkyldihydroxyacetonephosphate synthase, peroxisomal	33	1125.88	1451.64	1388.94	1322.15	1764.94	1702.34	1840.92	1769.4	1.33827	0.0141564	0.420372	1.84905		CYP4F12		EXTL3	LAMTOR4	BNIP3	ATP6V0A4	SNX16		BACH1	ATXN2
sp|Q9BUB7|TMM70_HUMAN	TMEM70	TMM70_HUMAN Transmembrane protein 70, mitochondrial	1	19.8157	20.7505	19.3768	19.981	27.8439	23.1406	29.2047	26.7297	1.33776	0.0230133	0.419814	1.63802
sp|Q9P2X0-2|DPM3_HUMAN	DPM3	DPM3_HUMAN Isoform 2 of Dolichol-phosphate mannosyltransferase subunit 3	2	24.7651	23.6683	29.4737	25.969	26.7912	36.8543	40.4789	34.7081	1.33652	0.121933	0.418482	0.913879							OR10A6			IWS1
sp|Q12792|TWF1_HUMAN	TWF1	TWF1_HUMAN Twinfilin-1	11	387.59	305.21	315.913	336.237	448.751	475.528	423.778	449.352	1.33641	0.0193155	0.418367	1.71409
sp|Q9BRJ2|RM45_HUMAN	MRPL45	RM45_HUMAN 39S ribosomal protein L45, mitochondrial	12	357.49	462.856	455.62	425.322	537.279	554.752	612.95	568.327	1.33623	0.0250972	0.418166	1.60037							TRPV1			SNRNP35
sp|O14656|TOR1A_HUMAN	TOR1A	TOR1A_HUMAN Torsin-1A	7	318.834	325.705	347.825	330.788	470.735	403.986	450.441	441.721	1.33536	0.00681751	0.417228	2.16637
sp|Q96AG3|S2546_HUMAN	SLC25A46	S2546_HUMAN Solute carrier family 25 member 46	6	329.016	383.005	392.916	368.312	477.851	469.717	527.373	491.647	1.33486	0.0100298	0.416693	1.99871
sp|P50995|ANX11_HUMAN	ANXA11	ANX11_HUMAN Annexin A11	2	58.0201	45.7073	43.9431	49.2235	66.2084	62.2331	68.646	65.6958	1.33464	0.0265971	0.416455	1.57517		ERO1A		GOLGA7B	TMEM55B	COX7A1	CD2			CBFA2T2	CDC37
sp|Q96JJ7|TMX3_HUMAN	TMX3	TMX3_HUMAN Protein disulfide-isomerase TMX3	24	1366.07	1725.52	1686.84	1592.81	2284.78	1906.65	2182.68	2124.7	1.33393	0.0294948	0.415687	1.53025
sp|Q13813|SPTN1_HUMAN	SPTAN1	SPTN1_HUMAN Spectrin alpha chain, non-erythrocytic 1	145	5416.82	6002.97	7396.91	6272.23	7758.42	8362.22	8972.22	8364.29	1.33354	0.0376847	0.415263	1.42383
sp|Q9Y3P9|RBGP1_HUMAN	RABGAP1	RBGP1_HUMAN Rab GTPase-activating protein 1	3	165.896	134.951	125.716	142.188	186.677	202.465	179.476	189.539	1.33302	0.0272241	0.414701	1.56505										ZNF511
sp|Q7L0Y3|MRRP1_HUMAN	TRMT10C	MRRP1_HUMAN Mitochondrial ribonuclease P protein 1	12	348.343	428.968	423.943	400.418	507.296	549.195	544.292	533.594	1.33259	0.0103811	0.414236	1.98376
sp|Q9BYD6|RM01_HUMAN	MRPL1	RM01_HUMAN 39S ribosomal protein L1, mitochondrial	8	498.824	625.414	654.646	592.961	738.644	787.172	840.334	788.717	1.33013	0.0251593	0.411569	1.5993							TRBV6-9			SLX1A; SLX1B
sp|P22307|NLTP_HUMAN	SCP2	NLTP_HUMAN Non-specific lipid-transfer protein	18	775.437	911.7	918.173	868.437	1142.95	1154.01	1167.05	1154.67	1.32959	0.00369206	0.410985	2.43273										ZNF878
sp|P35520-2|CBS_HUMAN	CBS	CBS_HUMAN Isoform 2 of Cystathionine beta-synthase	1	9.06299	8.94786	8.36928	8.79338	13.1642	12.293	9.6054	11.6875	1.32913	0.0570063	0.410481	1.24408		TECRL				MTFR2	GFRAL			ELOA3D	MAP4K4
sp|Q8N9F7|GDPD1_HUMAN	GDPD1	GDPD1_HUMAN Glycerophosphodiester phosphodiesterase domain-containing protein 1	1	19.7452	29.5479	24.6596	24.6509	34.3769	31.5701	32.3276	32.7582	1.32888	0.0515355	0.410215	1.28789							OR5R1			NELFA
sp|Q8NHV4|NEDD1_HUMAN	NEDD1	NEDD1_HUMAN Protein NEDD1	1	13.8735	11.1029	11.1646	12.047	16.3229	15.9482	15.7444	16.0052	1.32856	0.0130458	0.409863	1.88453										TCEAL6
sp|Q8N392|RHG18_HUMAN	ARHGAP18	RHG18_HUMAN Rho GTPase-activating protein 18	1	13.4496	9.37376	9.90072	10.908	14.7394	16.4597	12.2703	14.4898	1.32836	0.112336	0.409649	0.949482		HHAT		MGAT3		DNAJC15	CDH26			CDX2	CTU2
sp|Q6P161|RM54_HUMAN	MRPL54	RM54_HUMAN 39S ribosomal protein L54, mitochondrial	1	59.0279	77.1369	85.7692	73.978	92.8269	102.614	99.251	98.2307	1.32784	0.0444755	0.409077	1.35188							TTYH3			SNRPN
sp|Q9HAV0|GBB4_HUMAN	GNB4	GBB4_HUMAN Guanine nucleotide-binding protein subunit beta-4	5	702.724	870.259	739.277	770.754	1183.56	748.418	1138.02	1023.33	1.3277	0.161221	0.408933	0.792579							OR8B2			NKX3-1
sp|Q03518|TAP1_HUMAN	TAP1	TAP1_HUMAN Antigen peptide transporter 1	11	454.886	586.845	529.526	523.753	783.573	527.546	773.976	695.032	1.32702	0.136404	0.408193	0.865173
sp|Q5T160|SYRM_HUMAN	RARS2	SYRM_HUMAN Probable arginine--tRNA ligase, mitochondrial	10	249.707	321.008	329.945	300.22	402.702	395.216	397.083	398.334	1.32681	0.0183102	0.407958	1.73731										ZNF547
sp|Q13454|TUSC3_HUMAN	TUSC3	TUSC3_HUMAN Tumor suppressor candidate 3	5	365.174	467.357	541.923	458.151	572.975	608.906	640.781	607.554	1.3261	0.0527674	0.407189	1.27763
sp|Q9NV70|EXOC1_HUMAN	EXOC1	EXOC1_HUMAN Exocyst complex component 1	1	46.4533	38.5218	34.4281	39.8011	52.3258	54.1989	51.7863	52.7703	1.32585	0.0228019	0.40692	1.64203							OR2T5			MCM2
sp|Q15149|PLEC_HUMAN	PLEC	PLEC_HUMAN Plectin	252	9677.07	10334.1	11366.8	10459.4	11854.7	15171.6	14574.7	13867	1.3258	0.0396519	0.406861	1.40174										ZFP14
sp|Q96SZ6|CK5P1_HUMAN	CDK5RAP1	CK5P1_HUMAN CDK5 regulatory subunit-associated protein 1	5	168.762	265.679	250.557	228.333	289.156	301.91	316.451	302.506	1.32485	0.0756985	0.405825	1.12091		ZDHHC4				OMA1	GPR26			FANCE	NQO1
sp|Q16643-3|DREB_HUMAN	DBN1	DREB_HUMAN Isoform 3 of Drebrin	19	467.411	614.26	566.769	549.48	741.218	735.7	706.808	727.909	1.32472	0.0160736	0.405691	1.79389							MC1R			HNF4A	TEX44
sp|O43157|PLXB1_HUMAN	PLXNB1	PLXB1_HUMAN Plexin-B1	2	89.2695	112.519	108.255	103.348	140.409	127.878	142.229	136.839	1.32406	0.0166357	0.404965	1.77896										ZFP90
sp|Q9NX20|RM16_HUMAN	MRPL16	RM16_HUMAN 39S ribosomal protein L16, mitochondrial	1	14.3755	15.1271	17.428	15.6436	19.1998	22.0298	20.9001	20.7099	1.32386	0.0147336	0.40475	1.83169							TRBV9			SMARCAD1
sp|O43169|CYB5B_HUMAN	CYB5B	CYB5B_HUMAN Cytochrome b5 type B	7	424.104	500.202	503.028	475.778	605.445	617.271	666.809	629.842	1.32382	0.00852086	0.404702	2.06952						UQCR11	LTB4R			HIST3H2BB	SULT1A2
sp|P48507|GSH0_HUMAN	GCLM	GSH0_HUMAN Glutamate--cysteine ligase regulatory subunit	1	22.5431	15.9132	15.2191	17.8918	24.4219	24.403	22.1758	23.6669	1.32278	0.0779392	0.403573	1.10824							OR5L1			NCOA7
sp|Q9Y2H0|DLGP4_HUMAN	DLGAP4	DLGP4_HUMAN Disks large-associated protein 4	3	79.6973	68.7754	68.8695	72.4474	97.5038	94.6913	95.0595	95.7516	1.32167	0.00334887	0.402362	2.4751							NMUR2			IKZF5	YWHAZ
sp|Q8NBN3|TM87A_HUMAN	TMEM87A	TM87A_HUMAN Transmembrane protein 87A	6	455.571	523.384	530.45	503.135	667.661	672.995	653.377	664.678	1.32107	0.00277278	0.401709	2.55708
sp|P23634|AT2B4_HUMAN	ATP2B4	AT2B4_HUMAN Plasma membrane calcium-transporting ATPase 4	10	565.618	753.618	705.13	674.789	980.291	702.121	990.953	891.122	1.32059	0.120801	0.401187	0.91793		MIA2		ST3GAL4		GPAM	CLDN2			COPRS	EIF3H
sp|P47755|CAZA2_HUMAN	CAPZA2	CAZA2_HUMAN F-actin-capping protein subunit alpha-2	3	58.8581	58.6265	53.9678	57.1508	72.0867	82.2642	71.9655	75.4388	1.32	0.00830519	0.400533	2.08065		SSR4				MT-ND2	GABRG1			ELF2	LRSAM1
sp|P00403|COX2_HUMAN	MT-CO2	COX2_HUMAN Cytochrome c oxidase subunit 2	21	805.975	783.738	831.178	806.964	943.21	1083.95	1165.66	1064.27	1.31886	0.01791	0.399291	1.74691										SPIC
sp|Q9UK61|F208A_HUMAN	FAM208A	F208A_HUMAN Protein FAM208A	2	30.3132	37.2158	42.017	36.5153	51.26	44.4445	48.6923	48.1322	1.31814	0.0418887	0.398501	1.3779							OR4D9			MED9
sp|P27144|KAD4_HUMAN	AK4	KAD4_HUMAN Adenylate kinase 4, mitochondrial	19	854.287	975.702	962.626	930.872	1068.67	1431.99	1180.23	1226.97	1.31808	0.0604139	0.39844	1.21886		DERL2		GAL3ST1	MPO	CHCHD2P9	BRS3	STEAP1		BCL6	BIRC8
sp|Q9H936|GHC1_HUMAN	SLC25A22	GHC1_HUMAN Mitochondrial glutamate carrier 1	5	246.354	300.971	292.803	280.043	336.09	410.45	360.227	368.922	1.31738	0.0327404	0.39767	1.48492
sp|P12236|ADT3_HUMAN	SLC25A6	ADT3_HUMAN ADP/ATP translocase 3	23	1185.22	1423.15	1414.81	1341.06	1692.34	1800.66	1803.93	1765.64	1.3166	0.00788118	0.396822	2.10341
sp|Q9P0S9|TM14C_HUMAN	TMEM14C	TM14C_HUMAN Transmembrane protein 14C	1	52.0583	49.384	51.3624	50.9349	54.2214	72.9612	73.9772	67.0533	1.31645	0.0674616	0.396653	1.17094
sp|P29966|MARCS_HUMAN	MARCKS	MARCS_HUMAN Myristoylated alanine-rich C-kinase substrate	19	885.307	958.958	791.035	878.433	1382.41	1034.76	1051.02	1156.06	1.31605	0.087404	0.396216	1.05847							TRAV1-1			RRP1
sp|O00233|PSMD9_HUMAN	PSMD9	PSMD9_HUMAN 26S proteasome non-ATPase regulatory subunit 9	2	36.9016	31.9287	33.6277	34.1527	43.6786	47.2543	43.9001	44.9443	1.31598	0.00440821	0.396141	2.35574										ZNF329
sp|Q14156|EFR3A_HUMAN	EFR3A	EFR3A_HUMAN Protein EFR3 homolog A	1	38.3245	45.9622	43.2543	42.5137	58.0342	49.3942	60.4	55.9428	1.31588	0.0288906	0.396026	1.53924							OR13C6P			KLF6
sp|Q8NI60|ADCK3_HUMAN	ADCK3	ADCK3_HUMAN Chaperone activity of bc1 complex-like, mitochondrial	2	55.2188	67.2149	64.6567	62.3635	81.8799	77.2519	86.9788	82.0368	1.31546	0.0129189	0.395571	1.88878		CYP2C19		COPB1	GRN	ATP5MGL	ARRDC1	RIN3		ATAD2B	ARHGEF16
sp|P51649-2|SSDH_HUMAN	ALDH5A1	SSDH_HUMAN Isoform 2 of Succinate-semialdehyde dehydrogenase, mitochondrial	6	256.008	309.065	277.258	280.777	351.978	377.641	378.311	369.31	1.31531	0.00746076	0.395407	2.12722		DOLPP1		GALNT8	RPTOR	COA4	CACNG8	VPS35L		BRD2	CABP5
sp|Q9P0L0|VAPA_HUMAN	VAPA	VAPA_HUMAN Vesicle-associated membrane protein-associated protein A	27	1381.05	1498.13	1596.44	1491.88	1868.52	1870.71	2133.19	1957.47	1.31209	0.0124104	0.391866	1.90622
sp|P09493-5|TPM1_HUMAN	TPM1	TPM1_HUMAN Isoform 5 of Tropomyosin alpha-1 chain	1	39.6844	30.7025	41.3903	37.2591	51.3646	57.0187	38.2276	48.8703	1.31164	0.147558	0.391367	0.831037
sp|Q8NFJ5|RAI3_HUMAN	GPRC5A	RAI3_HUMAN Retinoic acid-induced protein 3	8	718.358	613.677	608.398	646.811	847.431	852.229	844.958	848.206	1.31137	0.00494514	0.391071	2.30582							P2RX3			NR2C1
sp|Q71RC2-4|LARP4_HUMAN	LARP4	LARP4_HUMAN Isoform 4 of La-related protein 4	1	18.4291	18.0391	15.0692	17.1791	22.8382	21.6692	23.0734	22.5269	1.3113	0.00955344	0.390994	2.01984							SLC9A3			RAX2
sp|O14732|IMPA2_HUMAN	IMPA2	IMPA2_HUMAN Inositol monophosphatase 2	1	52.5603	41.9497	38.7925	44.4342	55.8889	64.402	54.4731	58.2546	1.31103	0.0562709	0.390704	1.24972							SEMA6C			POLR3C
sp|Q07157|ZO1_HUMAN	TJP1	ZO1_HUMAN Tight junction protein ZO-1	6	314.523	237.595	266.254	272.791	354.946	360.749	356.645	357.447	1.31033	0.0197672	0.389935	1.70406
sp|Q8WVQ1|CANT1_HUMAN	CANT1	CANT1_HUMAN Soluble calcium-activated nucleotidase 1	10	318.554	347.148	354.28	339.994	456.227	420.972	459.199	445.466	1.31022	0.00302555	0.389805	2.5192		SPTSSA				MRPS9	FZD3			EGLN2	LDHB
sp|P61224|RAP1B_HUMAN	RAP1B	RAP1B_HUMAN Ras-related protein Rap-1b	6	397.119	430.538	393.052	406.903	452.993	600.757	543.236	532.329	1.30825	0.048246	0.387633	1.31654										ZNF536
sp|P55011|S12A2_HUMAN	SLC12A2	S12A2_HUMAN Solute carrier family 12 member 2	25	929.616	1292.64	1137.12	1119.79	1478.38	1401.41	1513.87	1464.56	1.30788	0.0353023	0.387229	1.4522
sp|O75911|DHRS3_HUMAN	DHRS3	DHRS3_HUMAN Short-chain dehydrogenase/reductase 3	1	17.9647	17.0702	18.1817	17.7389	20.897	23.606	25.0546	23.1859	1.30707	0.0125883	0.386332	1.90003							NECTIN2			HOXD13	UNC45B
sp|O75044|SRGP2_HUMAN	SRGAP2	SRGP2_HUMAN SLIT-ROBO Rho GTPase-activating protein 2	1	11.0225	12.2644	7.13367	10.1402	12.3352	15.2654	12.1145	13.2383	1.30553	0.169167	0.384638	0.771684
sp|O75251|NDUS7_HUMAN	NDUFS7	NDUS7_HUMAN NADH dehydrogenase [ubiquinone] iron-sulfur protein 7, mitochondrial	9	282.767	348.928	308.791	313.495	407.787	394.761	425.165	409.238	1.3054	0.0106251	0.384495	1.97367										TCEA1
sp|P07942|LAMB1_HUMAN	LAMB1	LAMB1_HUMAN Laminin subunit beta-1	22	660.086	910.253	771.278	780.539	1059.37	983.16	1014.02	1018.85	1.30532	0.0345409	0.384402	1.46167							SLC6A1			RAD23A
sp|P04040|CATA_HUMAN	CAT	CATA_HUMAN Catalase	29	1240.99	1651.53	1565.81	1486.11	2000.49	1812.19	2004.1	1938.93	1.3047	0.0319656	0.383718	1.49532		TAP2				MTERF4	GAS1			ELOA2	MAGEB4
sp|Q13136|LIPA1_HUMAN	PPFIA1	LIPA1_HUMAN Liprin-alpha-1	2	24.2836	20.7733	25.4527	23.5032	29.1322	31.9965	30.8651	30.6646	1.3047	0.0118557	0.383715	1.92607										ZNF114
sp|P42566|EPS15_HUMAN	EPS15	EPS15_HUMAN Epidermal growth factor receptor substrate 15	5	130.959	116.969	117.244	121.724	163.901	160.075	152.446	158.807	1.30465	0.002909	0.383665	2.53626							OR2J1			MAFF
sp|Q9BZE1|RM37_HUMAN	MRPL37	RM37_HUMAN 39S ribosomal protein L37, mitochondrial	8	312.374	394.174	387.444	364.664	455.937	462.252	507.282	475.157	1.303	0.0230151	0.381838	1.63799							TRGV8			SNAPC1
sp|Q92530|PSMF1_HUMAN	PSMF1	PSMF1_HUMAN Proteasome inhibitor PI31 subunit	1	34.2374	29.1298	27.6218	30.3296	41.2662	41.4578	35.7892	39.5044	1.3025	0.028333	0.381284	1.54771										ZNF334
sp|Q15599|NHRF2_HUMAN	SLC9A3R2	NHRF2_HUMAN Na(+)/H(+) exchange regulatory cofactor NHE-RF2	8	412.86	498.282	474.373	461.838	578.299	605.722	620.452	601.491	1.30239	0.00782923	0.381156	2.10628
sp|Q9NX62|IMPA3_HUMAN	IMPAD1	IMPA3_HUMAN Inositol monophosphatase 3	11	607.865	692.514	677.946	659.442	871.059	865.528	838.597	858.395	1.3017	0.00206889	0.380396	2.68426							SEMA7A			POLR3D
sp|P14314-2|GLU2B_HUMAN	PRKCSH	GLU2B_HUMAN Isoform 2 of Glucosidase 2 subunit beta	45	1671.86	2201.56	1907.07	1926.83	2522.73	2277.09	2719.25	2506.36	1.30077	0.043963	0.379362	1.35691										ZNF227
sp|Q8IWT6|LRC8A_HUMAN	LRRC8A	LRC8A_HUMAN Leucine-rich repeat-containing protein 8A	11	245.209	303.463	286.601	278.424	364.321	323.192	398.694	362.069	1.30042	0.0398233	0.37898	1.39986							TCAF1			RHOXF2B
sp|O95861-2|BPNT1_HUMAN	BPNT1	BPNT1_HUMAN Isoform 2 of 3'(2'),5'-bisphosphate nucleotidase 1	3	113.685	107.168	90.8426	103.898	131.083	146.582	127.118	134.927	1.29865	0.0263223	0.377012	1.57968		RDH16				MRM2	DUOX1			DLX4	GUCY1A1
sp|P46821|MAP1B_HUMAN	MAP1B	MAP1B_HUMAN Microtubule-associated protein 1B	6	185.242	140.317	154.011	159.857	215.683	218.481	188.283	207.482	1.29793	0.0440777	0.376208	1.35578							TMPRSS9			RPF2
sp|Q9BQE5|APOL2_HUMAN	APOL2	APOL2_HUMAN Apolipoprotein L2	3	97.0949	95.8552	92.2265	95.0589	129.782	134.638	105.636	123.352	1.29764	0.0357411	0.375887	1.44683		FMO6P		HS3ST5		D2HGDH	CD81			CCNL1	CPPED1
sp|Q6IAN0|DRS7B_HUMAN	DHRS7B	DRS7B_HUMAN Dehydrogenase/reductase SDR family member 7B	4	112.601	144.218	133.974	130.264	154.375	173.928	178.54	168.948	1.29696	0.0313539	0.375135	1.50371							NEO1			HOXD8	URM1
sp|Q14258|TRI25_HUMAN	TRIM25	TRI25_HUMAN E3 ubiquitin/ISG15 ligase TRIM25	6	469.58	279.397	356.307	368.428	463.389	545.915	423.015	477.44	1.29588	0.174055	0.373936	0.759314
sp|P82909|RT36_HUMAN	MRPS36	RT36_HUMAN 28S ribosomal protein S36, mitochondrial	7	293.2	344.886	339.658	325.915	278.118	539.782	448.503	422.134	1.29523	0.287099	0.373207	0.541968							VSIR			SP3
sp|P06753-5|TPM3_HUMAN	TPM3	TPM3_HUMAN Isoform 5 of Tropomyosin alpha-3 chain	9	229.866	139.152	196.801	188.606	242.691	283.259	206.419	244.123	1.29435	0.183563	0.37223	0.736215
sp|P55072|TERA_HUMAN	VCP	TERA_HUMAN Transitional endoplasmic reticulum ATPase	43	2003.22	2176.72	2216.49	2132.14	2753.61	2671.71	2853.27	2759.53	1.29425	0.0017116	0.372117	2.7666
sp|Q7Z3C6|ATG9A_HUMAN	ATG9A	ATG9A_HUMAN Autophagy-related protein 9A	11	793.861	837.74	728.777	786.793	1041.93	1008.97	1003.28	1018.06	1.29394	0.00240526	0.371769	2.61884		LPCAT3		SLC35A1		GATM	CHRNE			CIC	ECHDC1
sp|O43615|TIM44_HUMAN	TIMM44	TIM44_HUMAN Mitochondrial import inner membrane translocase subunit TIM44	34	2175.2	2780.51	2625.06	2526.93	3342.87	3208.3	3243.64	3264.94	1.29206	0.016543	0.369673	1.78139
sp|Q9Y639|NPTN_HUMAN	NPTN	NPTN_HUMAN Neuroplastin	5	266.093	337.386	292.494	298.658	396.285	385.752	373.631	385.223	1.28985	0.0165644	0.367201	1.78082										TIGD6
sp|Q6P1M0|S27A4_HUMAN	SLC27A4	S27A4_HUMAN Long-chain fatty acid transport protein 4	8	248.917	291.1	264.117	268.045	345.155	328.93	362.797	345.627	1.28944	0.00787976	0.366743	2.10349
sp|Q99714|HCD2_HUMAN	HSD17B10	HCD2_HUMAN 3-hydroxyacyl-CoA dehydrogenase type-2	24	696.841	745.863	773.365	738.69	927.965	975.819	953.597	952.46	1.28939	0.00124727	0.36669	2.90404							PTH1R			PHTF1
sp|Q14974|IMB1_HUMAN	KPNB1	IMB1_HUMAN Importin subunit beta-1	35	1360.79	1345.02	1318.69	1341.5	1793.2	1733.35	1659.87	1728.81	1.28871	0.000665625	0.365933	3.17677							SLC4A11			PWP2
sp|P19367-3|HXK1_HUMAN	HK1	HXK1_HUMAN Isoform 3 of Hexokinase-1	17	750.861	717.485	695.985	721.444	916.144	930.47	941.918	929.511	1.2884	0.000294354	0.365585	3.53113							PCDHGC4			PATZ1
sp|Q9NUP9|LIN7C_HUMAN	LIN7C	LIN7C_HUMAN Protein lin-7 homolog C	6	183.094	196.295	185	188.13	237.778	241.193	248.124	242.365	1.28829	0.000450206	0.365455	3.34659							SSTR5			RBMX
sp|Q9UII2|ATIF1_HUMAN	ATPIF1	ATIF1_HUMAN ATPase inhibitor, mitochondrial	9	469.779	609.884	550.695	543.452	544.362	839.326	715.821	699.836	1.28776	0.173914	0.364864	0.759664		PCYT1B		TMED7		IFI27L2	CNTN1			CUSTOS	FBXW5
sp|Q9NWV8|BABA1_HUMAN	BABAM1	BABA1_HUMAN BRISC and BRCA1-A complex member 1	2	55.0731	56.7891	52.6569	54.8397	64.4191	75.2239	71.9647	70.5359	1.28622	0.0100794	0.363137	1.99657		PIGN		TRAPPC3		LIPT1	CSMD3			DCAF17	GFAP
sp|O14966|RAB7L_HUMAN	RAB7L1	RAB7L_HUMAN Ras-related protein Rab-7L1	2	22.2916	27.0302	23.1935	24.1718	31.7449	28.3475	33.1685	31.087	1.28609	0.0274715	0.362988	1.56112										ZNF502
sp|O75695|XRP2_HUMAN	RP2	XRP2_HUMAN Protein XRP2	5	183.745	190.842	178.329	184.305	247.432	237.78	225.656	236.956	1.28567	0.00192636	0.362524	2.71526										ZNF641
sp|P30519|HMOX2_HUMAN	HMOX2	HMOX2_HUMAN Heme oxygenase 2	21	612.26	697.333	706.592	672.062	850.475	863.101	877.139	863.572	1.28496	0.00348444	0.361723	2.45787							PLXNA3			PCGF1
sp|P49841-2|GSK3B_HUMAN	GSK3B	GSK3B_HUMAN Isoform 2 of Glycogen synthase kinase-3 beta	2	32.6274	26.0291	26.9293	28.5286	36.7065	37.6179	35.6336	36.6527	1.28477	0.0192795	0.361511	1.7149							PAQR7			NSD1
sp|Q6NUK1|SCMC1_HUMAN	SLC25A24	SCMC1_HUMAN Calcium-binding mitochondrial carrier protein SCaMC-1	51	1966.69	2533.28	2390.34	2296.77	3017.1	2719.82	3108.08	2948.33	1.28369	0.0343922	0.360293	1.46354
sp|Q8N9E0|F133A_HUMAN	FAM133A	F133A_HUMAN Protein FAM133A	2	106.7	12.5548	25.3705	48.2083	49.7218	80.173	55.7161	61.8703	1.2834	0.681387	0.359966	0.166606							OR4C5			MED27
sp|Q9NXH8|TOR4A_HUMAN	TOR4A	TOR4A_HUMAN Torsin-4A	6	171.337	195.538	193.781	186.885	229.384	232.809	257.208	239.8	1.28314	0.0107093	0.359682	1.97024
sp|P54577|SYYC_HUMAN	YARS	SYYC_HUMAN Tyrosine--tRNA ligase, cytoplasmic	22	1159.36	885.784	984.823	1009.99	1268.96	1441.37	1174.71	1295.01	1.2822	0.0632887	0.358624	1.19867
sp|O15427|MOT4_HUMAN	SLC16A3	MOT4_HUMAN Monocarboxylate transporter 4	9	722.899	911.36	791.835	808.698	1074.11	949.13	1082.82	1035.35	1.28027	0.0316948	0.35645	1.49901
sp|Q96FW1|OTUB1_HUMAN	OTUB1	OTUB1_HUMAN Ubiquitin thioesterase OTUB1	6	139.048	115.558	118.82	124.475	151.518	172.567	153.385	159.157	1.27862	0.0253131	0.354591	1.59665										UBE2W
sp|Q12913|PTPRJ_HUMAN	PTPRJ	PTPRJ_HUMAN Receptor-type tyrosine-protein phosphatase eta	15	598.191	550.983	531.412	560.195	749.191	695.757	703.433	716.127	1.27835	0.00383677	0.354287	2.41603										ZNF384
sp|Q8ND76|CCNY_HUMAN	CCNY	CCNY_HUMAN Cyclin-Y	1	33.0665	33.3356	30.5689	32.3236	42.0544	40.3334	41.5728	41.3202	1.27833	0.000908822	0.354258	3.04152		TMEM41B				NDUFA4	GLP2R			ERF	N4BP2
sp|Q9NUI1|DECR2_HUMAN	DECR2	DECR2_HUMAN Peroxisomal 2,4-dienoyl-CoA reductase	2	31.705	39.1289	35.369	35.4009	48.7311	37.3014	49.6891	45.2405	1.27795	0.0950534	0.353829	1.02203							MUSK			HOXC10	UBAC1
sp|Q96KB5|TOPK_HUMAN	PBK	TOPK_HUMAN Lymphokine-activated killer T-cell-originated protein kinase	1	82.7312	59.9256	61.2423	67.9664	86.3035	96.1025	78.033	86.813	1.27729	0.105748	0.35309	0.975729										UTP3
sp|O75351|VPS4B_HUMAN	VPS4B	VPS4B_HUMAN Vacuolar protein sorting-associated protein 4B	2	133.22	92.5411	95.7628	107.175	128.081	151.223	131.336	136.88	1.27717	0.117415	0.352949	0.930278
sp|Q9Y277|VDAC3_HUMAN	VDAC3	VDAC3_HUMAN Voltage-dependent anion-selective channel protein 3	29	1387.42	1808.66	1580.96	1592.35	1993.5	1980.28	2126.05	2033.28	1.2769	0.027704	0.35265	1.55746
sp|Q9Y672|ALG6_HUMAN	ALG6	ALG6_HUMAN Dolichyl pyrophosphate Man9GlcNAc2 alpha-1,3-glucosyltransferase	1	69.8645	89.2283	86.6123	81.9017	99.4271	107.678	106.558	104.554	1.27658	0.0263963	0.352287	1.57846		ELOVL1		GCNT3	SLC15A4	COQ6	CATSPER3	VTI1B		BTAF1	CASKIN2
sp|Q96RQ3|MCCA_HUMAN	MCCC1	MCCA_HUMAN Methylcrotonoyl-CoA carboxylase subunit alpha, mitochondrial	13	320.846	447.457	392.946	387.083	491.569	473.335	515.752	493.552	1.27505	0.0512021	0.350559	1.29071							TRAV20			RTL3
sp|Q9H1H9|KI13A_HUMAN	KIF13A	KI13A_HUMAN Kinesin-like protein KIF13A	1	58.0844	45.2481	45.5505	49.6277	60.7493	68.2433	60.7448	63.2458	1.27441	0.050214	0.349826	1.29917							SLC38A5			PRRX2
sp|P12004|PCNA_HUMAN	PCNA	PCNA_HUMAN Proliferating cell nuclear antigen	10	539.363	550.87	623.078	571.104	749.737	694.243	737.668	727.216	1.27335	0.00742883	0.348631	2.12908										VGLL4
sp|Q92626|PXDN_HUMAN	PXDN	PXDN_HUMAN Peroxidasin homolog	6	159.686	182.653	183.448	175.262	222.946	216.507	229.972	223.141	1.27319	0.00533394	0.348443	2.27295										ZNF423
sp|Q53EP0|FND3B_HUMAN	FNDC3B	FND3B_HUMAN Fibronectin type III domain-containing protein 3B	13	543.527	711.538	674.345	643.137	814.562	787.082	854.425	818.69	1.27296	0.0323734	0.348191	1.48981							OR52J3			MTMR8
sp|O95182|NDUA7_HUMAN	NDUFA7	NDUA7_HUMAN NADH dehydrogenase [ubiquinone] 1 alpha subcomplex subunit 7	4	214.437	260.78	243.641	239.619	269.358	341.452	303.61	304.807	1.27205	0.0584667	0.347152	1.23309										TAL1
sp|P41252|SYIC_HUMAN	IARS	SYIC_HUMAN Isoleucine--tRNA ligase, cytoplasmic	15	646.913	499.374	517.325	554.537	723.966	741.583	650.534	705.361	1.27198	0.0496777	0.347077	1.30384							ROS1			PNMA2
sp|O95757|HS74L_HUMAN	HSPA4L	HS74L_HUMAN Heat shock 70 kDa protein 4L	1	11.6099	7.94842	11.4389	10.3324	14.3731	9.55865	15.4853	13.139	1.27163	0.266473	0.346683	0.574347							RELL2			PKP1
sp|Q9UH65|SWP70_HUMAN	SWAP70	SWP70_HUMAN Switch-associated protein 70	10	335.019	280.143	293.137	302.767	394.562	435.498	324.579	384.88	1.27121	0.0869024	0.346203	1.06097
sp|P46736|BRCC3_HUMAN	BRCC3	BRCC3_HUMAN Lys-63-specific deubiquitinase BRCC36	2	105.826	86.6036	83.7315	92.0536	108.185	136.661	106.182	117.009	1.2711	0.106924	0.346076	0.970925		REEP3				MRPL1	DYTN			DLX6	GUCY1B1
sp|Q9NWR8|MCUB_HUMAN	CCDC109B	MCUB_HUMAN Mitochondrial calcium uniporter regulatory subunit MCUb	1	48.2303	55.4197	55.7253	53.1251	64.2391	71.7376	66.5965	67.5244	1.27105	0.0120457	0.346016	1.91917		TMCC2				MTO1	GJA8			EMX2	MICALCL
sp|Q96FZ7|CHMP6_HUMAN	CHMP6	CHMP6_HUMAN Charged multivesicular body protein 6	1	33.0764	22.025	27.089	27.3968	33.1589	38.5557	32.7223	34.8123	1.27067	0.115858	0.34559	0.936074						PITRM1	GRIK5			FOXD4L4	PANK3
sp|Q9HCL2|GPAT1_HUMAN	GPAM	GPAT1_HUMAN Glycerol-3-phosphate acyltransferase 1, mitochondrial	1	26.6959	31.5138	32.1945	30.1347	38.5106	36.1673	40.1179	38.2653	1.26981	0.0173054	0.344608	1.76182							OR9G4			NOTO
sp|P25786-2|PSA1_HUMAN	PSMA1	PSA1_HUMAN Isoform Long of Proteasome subunit alpha type-1	6	469.002	361.099	354.407	394.836	508.09	531.488	464.027	501.202	1.26939	0.0647866	0.344137	1.18851										ZNF275
sp|P07108-5|ACBP_HUMAN	DBI	ACBP_HUMAN Isoform 5 of Acyl-CoA-binding protein	3	69.6729	76.7182	72.0296	72.8069	85.8054	105.663	85.725	92.3977	1.26908	0.0478507	0.343781	1.32011							MAS1L			HNF1B	TDRG1
sp|Q16537|2A5E_HUMAN	PPP2R5E	2A5E_HUMAN Serine/threonine-protein phosphatase 2A 56 kDa regulatory subunit epsilon isoform	1	44.8445	42.8653	37.8802	41.8633	52.6752	57.4991	49.1862	53.1202	1.26889	0.023973	0.343573	1.62028										ZNF17
sp|P56181|NDUV3_HUMAN	NDUFV3	NDUV3_HUMAN NADH dehydrogenase [ubiquinone] flavoprotein 3, mitochondrial	1	65.6794	69.6969	68.1873	67.8545	79.0651	90.0361	89.1616	86.0876	1.26871	0.00796138	0.343361	2.09901										TCEAL3
sp|P09493-3|TPM1_HUMAN	TPM1	TPM1_HUMAN Isoform 3 of Tropomyosin alpha-1 chain	22	1206.28	755.371	1126.41	1029.35	1228.68	1494.26	1194.46	1305.8	1.26856	0.175518	0.343193	0.755678
sp|O95782|AP2A1_HUMAN	AP2A1	AP2A1_HUMAN AP-2 complex subunit alpha-1	17	635.721	696.158	703.813	678.564	801.684	872.313	908.149	860.715	1.26844	0.00866819	0.343052	2.06207		FDFT1		GOPC		CPT1A	CD300LD			CC2D1B	CHML
sp|Q9P0K7-2|RAI14_HUMAN	RAI14	RAI14_HUMAN Isoform 2 of Ankycorbin	2	70.1237	66.7619	70.4752	69.1202	87.294	92.4051	83.3098	87.6696	1.26836	0.00301344	0.342969	2.52094										ZNF521
sp|Q9H082|RB33B_HUMAN	RAB33B	RB33B_HUMAN Ras-related protein Rab-33B	3	134.312	146.416	140.997	140.575	181.728	173.087	180.033	178.282	1.26824	0.00100624	0.342825	2.9973										ZNF485
sp|Q14118|DAG1_HUMAN	DAG1	DAG1_HUMAN Dystroglycan	14	593.06	690.228	637.087	640.125	803.954	793.481	837.14	811.525	1.26776	0.00524036	0.342282	2.28064						YARS2	LYPD5			HMGN5	TAOK1
sp|Q8N4Q1-2|MIA40_HUMAN	CHCHD4	MIA40_HUMAN Isoform 2 of Mitochondrial intermembrane space import and assembly protein 40	5	215.589	307.806	286.943	270.113	356.636	320.964	349.263	342.288	1.2672	0.0736407	0.341647	1.13288						PDHX	GPR83			FOSB	OTULIN
sp|Q9UBH6|XPR1_HUMAN	XPR1	XPR1_HUMAN Xenotropic and polytropic retrovirus receptor 1	1	28.3759	32.5223	32.7141	31.2041	37.288	40.8003	40.4739	39.5207	1.26652	0.00997288	0.340875	2.00118
sp|O95071|UBR5_HUMAN	UBR5	UBR5_HUMAN E3 ubiquitin-protein ligase UBR5	2	77.6107	70.4192	79.9383	75.9894	98.0635	99.9418	90.472	96.1591	1.26543	0.00774871	0.339625	2.11077
sp|O75306|NDUS2_HUMAN	NDUFS2	NDUS2_HUMAN NADH dehydrogenase [ubiquinone] iron-sulfur protein 2, mitochondrial	17	861.124	1032.25	1038.19	977.187	1157.92	1226.73	1325.01	1236.55	1.26542	0.02656	0.339617	1.57577										TBX3
sp|Q9NVS9|PNPO_HUMAN	PNPO	PNPO_HUMAN Pyridoxine-5'-phosphate oxidase	3	50.297	55.3298	56.9472	54.1913	70.81	63.7531	71.0461	68.5364	1.26471	0.0100471	0.338808	1.99796										ZIK1
sp|P43155|CACP_HUMAN	CRAT	CACP_HUMAN Carnitine O-acetyltransferase	15	472.667	620.777	586.971	560.138	724.411	692.989	707.548	708.316	1.26454	0.0316482	0.33861	1.49965						TIMM10	KIR3DL3			H2BW2	SELENOW
sp|P50238|CRIP1_HUMAN	CRIP1	CRIP1_HUMAN Cysteine-rich protein 1	1	53.3494	42.1554	41.5152	45.6733	60.2048	60.0943	52.8879	57.729	1.26395	0.0567098	0.337944	1.24634						TIMM17B	KISS1R			H4C1	SERPINB13
sp|Q658P3-2|STEA3_HUMAN	STEAP3	STEA3_HUMAN Isoform 2 of Metalloreductase STEAP3	5	138.687	169.138	159.176	155.667	198.868	190.989	199.208	196.355	1.26138	0.012174	0.335002	1.91457
sp|Q9Y606|TRUA_HUMAN	PUS1	TRUA_HUMAN tRNA pseudouridine synthase A, mitochondrial	6	152.209	197.68	190.603	180.164	227.654	211.303	242.686	227.214	1.26115	0.0486392	0.334742	1.31301										ZNF414
sp|O75027-2|ABCB7_HUMAN	ABCB7	ABCB7_HUMAN Isoform 2 of ATP-binding cassette sub-family B member 7, mitochondrial	17	620.199	848.432	752.06	740.23	929.406	903.992	967.141	933.513	1.26111	0.0480417	0.334696	1.31838		ALG3	MCFD2	ARSE	ATP6V0A2	ACADS	ADAM22	CHMP2B	DDO	ADNP	ACOT1	ATG4D	ATP6V1C2	MVB12B
sp|O60503|ADCY9_HUMAN	ADCY9	ADCY9_HUMAN Adenylate cyclase type 9	3	64.6847	78.2767	65.6643	69.5419	86.759	89.7232	86.615	87.6991	1.2611	0.0155794	0.334679	1.80745		CYP2F1		COPG2	HGSNAT	ATP5PF	ASIC2	SBF2		ATF7IP	ARMS2
sp|P46459|NSF_HUMAN	NSF	NSF_HUMAN Vesicle-fusing ATPase	44	1684.78	1710.76	1717.06	1704.2	2088.04	2174.82	2180.55	2147.8	1.2603	0.00014782	0.333765	3.83027										TLE3
sp|Q7Z7F7-2|RM55_HUMAN	MRPL55	RM55_HUMAN Isoform 2 of 39S ribosomal protein L55, mitochondrial	3	112.845	133.127	141.397	129.123	134.97	185.538	167.596	162.701	1.26005	0.120406	0.333477	0.919352							TXNDC15			SNU13
sp|P30038|AL4A1_HUMAN	ALDH4A1	AL4A1_HUMAN Delta-1-pyrroline-5-carboxylate dehydrogenase, mitochondrial	2	54.6004	78.4065	76.2494	69.7521	90.6563	81.3445	91.6449	87.8819	1.25992	0.0937163	0.333329	1.02818		DOLK		GALNT7	RNF152	COA3	CACNG7	VPS35		BRD1	CAB39
sp|Q9H832|UBE2Z_HUMAN	UBE2Z	UBE2Z_HUMAN Ubiquitin-conjugating enzyme E2 Z	1	10.7103	8.4271	8.52438	9.22058	11.6217	11.6262	11.5938	11.6139	1.25957	0.0325684	0.332926	1.4872
sp|P98155|VLDLR_HUMAN	VLDLR	VLDLR_HUMAN Very low-density lipoprotein receptor	6	250.645	256.042	235.824	247.504	305.339	308.981	319.577	311.299	1.25775	0.000995537	0.330851	3.00194
sp|P17812|PYRG1_HUMAN	CTPS1	PYRG1_HUMAN CTP synthase 1	5	190.173	150.683	160.768	167.208	204.543	222.323	203.469	210.112	1.25659	0.0323268	0.329514	1.49044						TP53AIP1	LPAR2			HIC2	SPRR2A
sp|Q8N183|MIMIT_HUMAN	NDUFAF2	MIMIT_HUMAN Mimitin, mitochondrial	19	1212.45	1179.3	1247.94	1213.23	1319.1	1578.03	1673.68	1523.6	1.25582	0.0449954	0.328633	1.34683										TBC1D1
sp|P05556|ITB1_HUMAN	ITGB1	ITB1_HUMAN Integrin beta-1	39	2523.73	3211.07	2647.09	2793.96	3722.6	3247.75	3546.75	3505.7	1.25474	0.0481238	0.327388	1.31764							SLC17A4			PPP2R3B
sp|A2RU67|K1467_HUMAN	KIAA1467	K1467_HUMAN Uncharacterized protein KIAA1467	4	99.1439	105.118	97.4903	100.584	125.363	130.436	122.092	125.964	1.25232	0.00163759	0.324605	2.78579							SLC30A1			PRPF4B
sp|O14613|BORG1_HUMAN	CDC42EP2	BORG1_HUMAN Cdc42 effector protein 2	2	42.8894	29.6168	32.2348	34.9137	48.1365	45.6665	37.3198	43.7076	1.25188	0.166942	0.324093	0.777434		UGT2B28				NLN	GPR17			FAM192A	NKIRAS2
sp|Q96EU7|C1GLC_HUMAN	C1GALT1C1	C1GLC_HUMAN C1GALT1-specific chaperone 1	1	22.2551	18.3348	22.12	20.9033	25.8168	26.2378	26.4056	26.1534	1.25116	0.0154928	0.323267	1.80987		SEC63				MRPL49	F2RL1			DUX1	IMPA1
sp|Q9Y519|T184B_HUMAN	TMEM184B	T184B_HUMAN Transmembrane protein 184B	1	37.1455	36.0575	34.5409	35.9146	42.6518	49.2139	42.8837	44.9165	1.25065	0.016809	0.322673	1.77446
sp|P49662|CASP4_HUMAN	CASP4	CASP4_HUMAN Caspase-4	2	28.0406	18.4177	17.2963	21.2515	30.0312	27.8244	21.8759	26.5772	1.2506	0.272634	0.322622	0.56442		SYVN1				MTERF2	GALR3			ELMSAN1	M1AP
sp|Q5SW79|CE170_HUMAN	CEP170	CE170_HUMAN Centrosomal protein of 170 kDa	3	53.1634	42.3229	38.8847	44.7903	57.8036	57.8431	52.3496	55.9988	1.25024	0.0744915	0.322208	1.12789						PARL	GPR45			FEV	NUDT10
sp|Q15185|TEBP_HUMAN	PTGES3	TEBP_HUMAN Prostaglandin E synthase 3	2	75.2579	55.3093	54.1507	61.5726	74.0813	82.8233	73.8516	76.9187	1.24924	0.108812	0.321047	0.963322										ZNF345
sp|Q13813-3|SPTN1_HUMAN	SPTAN1	SPTN1_HUMAN Isoform 3 of Spectrin alpha chain, non-erythrocytic 1	2	19.2402	21.7946	25.7242	22.253	23.7564	36.7957	22.8063	27.7861	1.24865	0.321185	0.320366	0.493245
sp|P63279|UBC9_HUMAN	UBE2I	UBC9_HUMAN SUMO-conjugating enzyme UBC9	5	295.973	333.489	378.567	336.01	451.213	405.091	400.636	418.98	1.24693	0.0451316	0.318378	1.34552
sp|P22314|UBA1_HUMAN	UBA1	UBA1_HUMAN Ubiquitin-like modifier-activating enzyme 1	29	1649.41	1119.91	1209.81	1326.37	1592.09	1868.88	1500.65	1653.87	1.24691	0.17265	0.318361	0.762833
sp|P11717|MPRI_HUMAN	IGF2R	MPRI_HUMAN Cation-independent mannose-6-phosphate receptor	49	2877.52	3247.27	2935.53	3020.11	4098.57	3019	4170.04	3762.54	1.24583	0.129426	0.317105	0.887978							SCN2A			POLR1A
sp|Q9H223|EHD4_HUMAN	EHD4	EHD4_HUMAN EH domain-containing protein 4	2	28.1515	32.9299	25.7932	28.9582	36.4184	35.7979	36.0121	36.0761	1.2458	0.0278381	0.317072	1.55536							OR13H1			KMT2A
sp|O15320-5|CTGE5_HUMAN	CTAGE5	CTGE5_HUMAN Isoform 6 of cTAGE family member 5	18	669.202	776.335	823.667	756.402	892.33	923.198	1011.14	942.224	1.24567	0.0326398	0.316918	1.48625						TOMM40	LILRB3			HES7	SPAG1
sp|O15031|PLXB2_HUMAN	PLXNB2	PLXB2_HUMAN Plexin-B2	34	1149.98	1413.68	1313.17	1292.28	1636.84	1566.18	1621.47	1608.16	1.24444	0.0166838	0.315495	1.7777										ZFP91
sp|Q86SQ0|PHLB2_HUMAN	PHLDB2	PHLB2_HUMAN Pleckstrin homology-like domain family B member 2	1	8.38218	9.92991	11.68	9.99738	14.0237	12.5689	10.7225	12.4384	1.24416	0.144646	0.315173	0.839693										ZBTB41
sp|O76082-3|S22A5_HUMAN	SLC22A5	S22A5_HUMAN Isoform 3 of Solute carrier family 22 member 5	2	44.3131	52.9829	47.1876	48.1612	62.5154	55.5253	61.7004	59.9137	1.24402	0.0252304	0.315015	1.59808
sp|Q6ZVF9|GRIN3_HUMAN	GPRIN3	GRIN3_HUMAN G protein-regulated inducer of neurite outgrowth 3	1	76.4805	77.8704	73.9807	76.1105	91.7873	93.8343	98.3405	94.654	1.24364	0.00117283	0.314568	2.93077							P2RY1			NR2C2AP
sp|P20645|MPRD_HUMAN	M6PR	MPRD_HUMAN Cation-dependent mannose-6-phosphate receptor	3	130.813	134.992	134.504	133.437	166.137	160.773	170.714	165.874	1.2431	0.000508399	0.313938	3.29379							TMEM102			RNF169
sp|Q9UL26|RB22A_HUMAN	RAB22A	RB22A_HUMAN Ras-related protein Rab-22A	4	119.616	123.064	111.931	118.204	144.576	147.108	149.092	146.925	1.24298	0.00125547	0.313808	2.9012										ZNF470
sp|O95425|SVIL_HUMAN	SVIL	SVIL_HUMAN Supervillin	5	101.598	99.7831	87.9789	96.4534	127.357	109.819	121.616	119.597	1.23995	0.0259403	0.310283	1.58602
sp|Q6UWE0|LRSM1_HUMAN	LRSAM1	LRSM1_HUMAN E3 ubiquitin-protein ligase LRSAM1	4	94.0021	94.3724	84.1446	90.8397	124.49	99.0923	114.225	112.603	1.23958	0.054865	0.309846	1.2607							TGFBR1			RIPPLY1
sp|Q5SWX8|ODR4_HUMAN	ODR4	ODR4_HUMAN Protein odr-4 homolog	8	521.862	619.42	619.874	587.052	732.84	672.564	776.369	727.257	1.23883	0.0341738	0.308978	1.46631										TSHZ2
sp|P15559|NQO1_HUMAN	NQO1	NQO1_HUMAN NAD(P)H dehydrogenase [quinone] 1	9	588.458	428.336	516.191	510.995	658.378	488.194	752.183	632.918	1.2386	0.247289	0.30871	0.606794										TIGD7
sp|Q96A65|EXOC4_HUMAN	EXOC4	EXOC4_HUMAN Exocyst complex component 4	1	9.37955	10.2301	9.52016	9.70993	11.9313	13.0962	11.0389	12.0221	1.23813	0.0237827	0.30816	1.62374							OR2T7			MCM4
sp|Q9HCJ1|ANKH_HUMAN	ANKH	ANKH_HUMAN Progressive ankylosis protein homolog	2	64.0093	62.4379	63.1388	63.1953	72.9133	80.2242	81.549	78.2288	1.23789	0.00525774	0.307882	2.2792		EPHX3		GLCE	SLC44A2	COX17	CCR2	WASHC4		C11orf54	CCDC125
sp|Q9NZZ3|CHMP5_HUMAN	CHMP5	CHMP5_HUMAN Charged multivesicular body protein 5	3	128.618	82.3402	90.9195	100.626	115.341	129.487	128.844	124.557	1.23783	0.184521	0.307809	0.733955						PISD	GRIK4			FOXD4L3	PANK1
sp|O94776|MTA2_HUMAN	MTA2	MTA2_HUMAN Metastasis-associated protein MTA2	4	97.4663	86.8983	100.306	94.8903	114.804	121.631	115.538	117.324	1.23642	0.00828893	0.306168	2.0815										SPIDR
sp|Q4G0N4|NAKD2_HUMAN	NADK2	NAKD2_HUMAN NAD kinase 2, mitochondrial	17	802.89	1062.16	993.939	952.996	1180.42	1088.09	1264.19	1177.57	1.23565	0.0727114	0.30527	1.1384										SUPT16H
sp|Q8IWL3|HSC20_HUMAN	HSCB	HSC20_HUMAN Iron-sulfur cluster co-chaperone protein HscB, mitochondrial	4	89.7843	114.677	115.398	106.62	138.82	127.894	128.398	131.704	1.23527	0.0517036	0.304826	1.28648							PTGIR			PHOX2B
sp|Q7Z2Z2|ETUD1_HUMAN	EFTUD1	ETUD1_HUMAN Elongation factor Tu GTP-binding domain-containing protein 1	1	100.562	79.0049	77.943	85.8365	101.999	117.667	97.9232	105.863	1.23331	0.103078	0.302537	0.986835							OR13C7			KLF7
sp|Q9UKK3|PARP4_HUMAN	PARP4	PARP4_HUMAN Poly [ADP-ribose] polymerase 4	3	70.0046	57.5842	51.1272	59.572	85.1173	61.347	73.8774	73.4472	1.23292	0.190845	0.302074	0.719319										UTP18
sp|Q92896-2|GSLG1_HUMAN	GLG1	GSLG1_HUMAN Isoform 2 of Golgi apparatus protein 1	21	799.881	921.227	884.952	868.687	1095.93	1015.88	1100.91	1070.91	1.23279	0.011127	0.301926	1.95362							OR6N1			NFYA
sp|Q99570|PI3R4_HUMAN	PIK3R4	PI3R4_HUMAN Phosphoinositide 3-kinase regulatory subunit 4	1	26.2227	26.5514	19.3111	24.0284	33.3397	26.5775	28.9187	29.612	1.23237	0.144332	0.301441	0.840637										ZBTB9
sp|Q9P0M9|RM27_HUMAN	MRPL27	RM27_HUMAN 39S ribosomal protein L27, mitochondrial	3	329.386	419.174	449.473	399.344	436.089	508.741	529.788	491.539	1.23087	0.114908	0.299675	0.939649							TRGC1			SMC1B
sp|P82673|RT35_HUMAN	MRPS35	RT35_HUMAN 28S ribosomal protein S35, mitochondrial	12	507.425	663.772	663.504	611.567	702.796	734.371	821.034	752.734	1.23083	0.0883194	0.299629	1.05394							VNN2			SP2
sp|P50542-4|PEX5_HUMAN	PEX5	PEX5_HUMAN Isoform 4 of Peroxisomal targeting signal 1 receptor	1	11.4004	10.5301	9.80635	10.579	11.7852	14.1462	13.1309	13.0208	1.23082	0.0415013	0.299616	1.38194										ZBED1
sp|Q08378|GOGA3_HUMAN	GOLGA3	GOGA3_HUMAN Golgin subfamily A member 3	5	130.893	125.898	125.717	127.503	159.825	162.328	148.559	156.904	1.23059	0.00298246	0.299352	2.52542							OR8H1			NOC3L
sp|Q8WWV3|RT4I1_HUMAN	RTN4IP1	RT4I1_HUMAN Reticulon-4-interacting protein 1, mitochondrial	3	106.858	121.194	121.596	116.549	128.32	151.097	150.63	143.349	1.22995	0.040072	0.298594	1.39716										ZNF792
sp|P29401-2|TKT_HUMAN	TKT	TKT_HUMAN Isoform 2 of Transketolase	15	723.791	359.439	396.525	493.252	609.733	593.852	615.405	606.33	1.22925	0.384648	0.297779	0.414936
sp|Q9Y2Z9|COQ6_HUMAN	COQ6	COQ6_HUMAN Ubiquinone biosynthesis monooxygenase COQ6	4	213.327	213.4	208.493	211.74	242.548	293.655	244.626	260.276	1.22923	0.0444408	0.29775	1.35222						SLC25A53	KCNJ18			GTF3C3	RNF123
sp|P82930|RT34_HUMAN	MRPS34	RT34_HUMAN 28S ribosomal protein S34, mitochondrial	7	277.509	343.885	352.433	324.609	367.772	418.046	410.808	398.875	1.22879	0.0591445	0.297235	1.22809							VNN1			SP110
sp|Q8NFQ8|TOIP2_HUMAN	TOR1AIP2	TOIP2_HUMAN Torsin-1A-interacting protein 2	15	834.059	932.709	1044.83	937.2	1216.13	1051.52	1186.92	1151.52	1.22869	0.053822	0.297116	1.26904
sp|Q08257|QOR_HUMAN	CRYZ	QOR_HUMAN Quinone oxidoreductase	11	807.84	921.263	955.348	894.817	1086.87	1050.35	1160.83	1099.35	1.22858	0.0207073	0.296988	1.68388						TIMM44	KREMEN1			HDAC9	SESN3
sp|P48067-2|SC6A9_HUMAN	SLC6A9	SC6A9_HUMAN Isoform GlyT-1A of Sodium- and chloride-dependent glycine transporter 1	2	85.6759	110.725	91.838	96.0798	116.395	113.73	123.748	117.958	1.22771	0.0542154	0.295966	1.26588
sp|Q7L9L4-2|MOB1B_HUMAN	MOB1B	MOB1B_HUMAN Isoform 2 of MOB kinase activator 1B	3	136.367	122.264	118.043	125.558	160.412	161.288	140.717	154.139	1.22763	0.0304187	0.295876	1.51686							TRBV25-1			SGO2
sp|O15381|NVL_HUMAN	NVL	NVL_HUMAN Nuclear valosin-containing protein-like	4	95.0438	121.512	122.13	112.895	153.394	124.56	137.528	138.494	1.22675	0.104166	0.29484	0.982273										TSEN2
sp|P00966|ASSY_HUMAN	ASS1	ASSY_HUMAN Argininosuccinate synthase	4	216.163	176.205	153.381	181.917	214.425	236.643	218.072	223.046	1.22609	0.103765	0.294068	0.983951		LCLAT1		SGMS1		FUNDC1	CHRNA9			CHFR	DUSP6
sp|Q12959-2|DLG1_HUMAN	DLG1	DLG1_HUMAN Isoform 2 of Disks large homolog 1	6	315.006	452.542	349.062	372.203	492.811	432.865	443.297	456.325	1.22601	0.136878	0.29397	0.863668							NMUR1			IKZF4	YWHAG
sp|P56945-6|BCAR1_HUMAN	BCAR1	BCAR1_HUMAN Isoform 6 of Breast cancer anti-estrogen resistance protein 1	21	1080.64	896.319	755.9	910.952	1186.52	1164.6	999.033	1116.72	1.22588	0.137666	0.293816	0.861172		PNPLA6		VPS45		MCUB	DAGLB			DDX46	GOT1
sp|Q96EA4|SPDLY_HUMAN	SPDL1	SPDLY_HUMAN Protein Spindly	1	28.8958	25.9378	21.875	25.5695	33.0869	32.2865	28.6254	31.3329	1.2254	0.0787306	0.293254	1.10386
sp|Q9UNF0|PACN2_HUMAN	PACSIN2	PACN2_HUMAN Protein kinase C and casein kinase substrate in neurons protein 2	9	408.379	335.171	333.654	359.068	462.829	453.315	403.537	439.894	1.2251	0.0583236	0.292899	1.23416										URB2
sp|O94874|UFL1_HUMAN	UFL1	UFL1_HUMAN E3 UFM1-protein ligase 1	23	925.711	1171.25	1113.54	1070.17	1327.52	1218.01	1387.36	1310.96	1.22501	0.0540856	0.29279	1.26692
sp|P28290|SSFA2_HUMAN	SSFA2	SSFA2_HUMAN Sperm-specific antigen 2	5	209.189	215.651	218.326	214.389	282.133	256.789	248.96	262.627	1.225	0.00965551	0.292787	2.01522
sp|Q8IYB8|SUV3_HUMAN	SUPV3L1	SUV3_HUMAN ATP-dependent RNA helicase SUPV3L1, mitochondrial	15	431.195	590.693	537.448	519.778	671.989	571.521	665.992	636.501	1.22456	0.110269	0.292266	0.957545
sp|P61586|RHOA_HUMAN	RHOA	RHOA_HUMAN Transforming protein RhoA	6	228.976	199.844	206.304	211.708	276.885	250.952	248.761	258.866	1.22275	0.0202467	0.29013	1.69365										ZNF600
sp|Q8WVM8|SCFD1_HUMAN	SCFD1	SCFD1_HUMAN Sec1 family domain-containing protein 1	19	647.968	600.788	692.688	647.148	761.841	829.432	782.21	791.161	1.22254	0.0123217	0.289876	1.90933										ZNF865
sp|Q12904-2|AIMP1_HUMAN	AIMP1	AIMP1_HUMAN Isoform 2 of Aminoacyl tRNA synthase complex-interacting multifunctional protein 1	6	179.768	152.289	160.764	164.274	195.77	233.037	173.602	200.803	1.22237	0.129111	0.289679	0.889035		DAD1		FUT5	MCOLN2	CCDC51	BLK	SNX6		BAZ2A	BDH2
sp|P46940|IQGA1_HUMAN	IQGAP1	IQGA1_HUMAN Ras GTPase-activating-like protein IQGAP1	47	2814.02	1985.98	2116.01	2305.33	2553.54	3085.83	2812.74	2817.37	1.22211	0.162537	0.289372	0.789047							SLAMF6			POU1F1
sp|Q92990|GLMN_HUMAN	GLMN	GLMN_HUMAN Glomulin	2	23.6004	23.0547	25.1083	23.9212	30.063	32.4847	25.1434	29.2304	1.22195	0.0772817	0.289182	1.11192							OR6P1			NFYC
sp|P54709|AT1B3_HUMAN	ATP1B3	AT1B3_HUMAN Sodium/potassium-transporting ATPase subunit beta-3	15	766.888	930.399	811.471	836.253	953.403	1018.36	1091.41	1021.06	1.22099	0.0426924	0.288053	1.36965		MEST		SPATA16		GLS2	CLDN16			CLUAP1	EIF3C
sp|Q8N1G4|LRC47_HUMAN	LRRC47	LRC47_HUMAN Leucine-rich repeat-containing protein 47	1	73.6762	42.7541	55.2593	57.2299	64.1329	80.4117	64.9682	69.8376	1.2203	0.293076	0.287236	0.53302							TBC1D3K			RHNO1
sp|Q14432|PDE3A_HUMAN	PDE3A	PDE3A_HUMAN cGMP-inhibited 3',5'-cyclic phosphodiesterase A	7	514.848	515.014	497.489	509.117	640.823	617.121	605.691	621.212	1.22017	0.000700644	0.287088	3.1545										WDR46
sp|Q9Y6W5|WASF2_HUMAN	WASF2	WASF2_HUMAN Wiskott-Aldrich syndrome protein family member 2	4	116.803	87.4531	94.9996	99.7518	120.534	127.258	117.348	121.713	1.22016	0.0769271	0.287074	1.11392
sp|Q9NPR9|GP108_HUMAN	GPR108	GP108_HUMAN Protein GPR108	2	84.7878	101.968	95.6462	94.1341	115.793	110.381	118.34	114.838	1.21994	0.0201546	0.286811	1.69563							OTOP3			NPIPB2
sp|Q96DZ1|ERLEC_HUMAN	ERLEC1	ERLEC_HUMAN Endoplasmic reticulum lectin 1	2	95.2175	115.527	118.361	109.702	121.515	132.18	147.767	133.821	1.21986	0.0841393	0.286713	1.075							OR2M3			MAML3
sp|Q9BQP7|MGME1_HUMAN	MGME1	MGME1_HUMAN Mitochondrial genome maintenance exonuclease 1	10	421.865	568.161	541.732	510.586	573.845	610.115	684.206	622.722	1.21962	0.11346	0.286433	0.945159							TRBJ2-2			SETBP1
sp|O95470|SGPL1_HUMAN	SGPL1	SGPL1_HUMAN Sphingosine-1-phosphate lyase 1	10	380.705	446.882	435.841	421.143	468.063	519.628	552.464	513.385	1.21903	0.044791	0.285732	1.34881
sp|Q86UP2|KTN1_HUMAN	KTN1	KTN1_HUMAN Kinectin	115	4750.04	6253.91	6443.92	5815.96	6839.67	6915.85	7511.08	7088.87	1.21886	0.0917458	0.285538	1.03741							SLC4A7			PYGO1
sp|P29992|GNA11_HUMAN	GNA11	GNA11_HUMAN Guanine nucleotide-binding protein subunit alpha-11	7	326.804	358.254	341.408	342.155	417.735	431.776	400.944	416.819	1.21821	0.00421659	0.284768	2.37504							OR7C1			NKRF
sp|Q9UPT5|EXOC7_HUMAN	EXOC7	EXOC7_HUMAN Exocyst complex component 7	3	72.1135	63.3941	56.6887	64.0654	78.2718	83.3835	72.387	78.0141	1.21773	0.0636242	0.284189	1.19638							OR2T8			MCM6
sp|Q9NWU1|OXSM_HUMAN	OXSM	OXSM_HUMAN 3-oxoacyl-[acyl-carrier-protein] synthase, mitochondrial	4	238.876	305.707	298.416	280.999	359.665	312.041	354.594	342.1	1.21744	0.0785214	0.283851	1.10501										UBR2
sp|P48449|ERG7_HUMAN	LSS	ERG7_HUMAN Lanosterol synthase	21	867.719	968.817	986.083	940.873	1157.93	1115.51	1161.79	1145.08	1.21704	0.00682373	0.283372	2.16598							TIE1			RLF
sp|Q13438-7|OS9_HUMAN	OS9	OS9_HUMAN Isoform 7 of Protein OS-9	2	83.1576	94.3101	92.5002	89.9893	107.263	110.024	111.158	109.481	1.21661	0.00588945	0.282862	2.22993										TXNL4B
sp|Q9BW92|SYTM_HUMAN	TARS2	SYTM_HUMAN Threonine--tRNA ligase, mitochondrial	13	711.597	897.102	864.819	824.506	1000.34	951.487	1056.88	1002.9	1.21637	0.0512534	0.282578	1.29028
sp|Q13308-6|PTK7_HUMAN	PTK7	PTK7_HUMAN Isoform 6 of Inactive tyrosine-protein kinase 7	12	308.492	401.504	365.176	358.391	440.488	420.933	446.237	435.886	1.21623	0.0510972	0.282418	1.2916										ZNF354A
sp|Q96G97-4|BSCL2_HUMAN	BSCL2	BSCL2_HUMAN Isoform 3 of Seipin	1	31.6102	45.0503	35.558	37.4062	49.3889	44.3774	42.7057	45.4907	1.21613	0.144461	0.282294	0.84025		RNF103				MRPL14	EFNA3			DMRT3	HECW1
sp|P49915|GUAA_HUMAN	GMPS	GUAA_HUMAN GMP synthase [glutamine-hydrolyzing]	3	113.931	77.3871	84.4739	91.9306	103.084	124.835	107.464	111.794	1.21607	0.201562	0.282229	0.695592							OR7A5			NKAPL
sp|Q5JRX3-2|PREP_HUMAN	PITRM1	PREP_HUMAN Isoform 2 of Presequence protease, mitochondrial	46	2004.19	2488.3	2500.21	2330.9	2856.31	2642.75	2995.51	2831.52	1.21478	0.0603708	0.280692	1.21917										ZC3H3
sp|Q7Z3D6-2|CN159_HUMAN	C14orf159	CN159_HUMAN Isoform 2 of UPF0317 protein C14orf159, mitochondrial	2	148.851	158.945	164.931	157.576	188.934	181.203	203.847	191.328	1.21419	0.0142723	0.279998	1.8455		SDF2L1				MRPL38	ERVK-25			DR1	HSPA14
sp|Q9H553|ALG2_HUMAN	ALG2	ALG2_HUMAN Alpha-1,3/1,6-mannosyltransferase ALG2	3	134.039	152.373	161.576	149.33	183.299	172.141	188.467	181.302	1.21411	0.0274146	0.279898	1.56202		EDEM3		GCNT1	SLC11A1	COQ4	CATSPER1	VPS8		BRMS1L	CARS1
sp|Q92485|ASM3B_HUMAN	SMPDL3B	ASM3B_HUMAN Acid sphingomyelinase-like phosphodiesterase 3b	1	58.59	66.9089	62.0361	62.5116	74.1	76.5032	77.0339	75.879	1.21384	0.00656904	0.279576	2.1825
sp|Q8TC07-3|TBC15_HUMAN	TBC1D15	TBC15_HUMAN Isoform 3 of TBC1 domain family member 15	3	74.7616	65.7974	60.6045	67.0545	83.5186	85.3889	75.1428	81.3501	1.21319	0.0513685	0.27881	1.2893
sp|Q9Y2Q9|RT28_HUMAN	MRPS28	RT28_HUMAN 28S ribosomal protein S28, mitochondrial	3	219.82	246.419	282.106	249.448	265.935	336.972	304.66	302.522	1.21277	0.124156	0.2783	0.906033							VN1R3			SOX6
sp|O75197|LRP5_HUMAN	LRP5	LRP5_HUMAN Low-density lipoprotein receptor-related protein 5	2	75.1588	87.714	76.7192	79.864	97.6494	96.8512	95.9955	96.832	1.21246	0.0130139	0.277939	1.88559							TBC1D3D			RFX4
sp|O95359|TACC2_HUMAN	TACC2	TACC2_HUMAN Transforming acidic coiled-coil-containing protein 2	1	70.756	59.2443	57.6971	62.5658	87.0927	75.4421	64.9963	75.8437	1.21222	0.155371	0.277656	0.80863
sp|Q96IR7|HPDL_HUMAN	HPDL	HPDL_HUMAN 4-hydroxyphenylpyruvate dioxygenase-like protein	9	148.268	185.065	186.592	173.308	201.409	196.523	231.957	209.963	1.2115	0.0935855	0.276794	1.02879							PTGDR			PHF21A
sp|Q9UEY8|ADDG_HUMAN	ADD3	ADDG_HUMAN Gamma-adducin	2	63.2072	62.2619	62.6352	62.7014	74.9156	72.5084	80.4131	75.9457	1.21123	0.00491866	0.276469	2.30815		CYP2R1		COPZ2	IDS	ATPAF1	ATP1A1	SCAMP2		ATMIN	ARPP21
sp|P63241-2|IF5A1_HUMAN	EIF5A	IF5A1_HUMAN Isoform 2 of Eukaryotic translation initiation factor 5A-1	5	350.613	207.655	187.002	248.423	313.63	292.997	295.853	300.827	1.21094	0.3693	0.276133	0.432621							OR1N1			LHX6
sp|Q9BSE5|SPEB_HUMAN	AGMAT	SPEB_HUMAN Agmatinase, mitochondrial	3	95.4738	105.267	118.148	106.296	133.254	124.538	128.357	128.716	1.21092	0.0332925	0.276104	1.47765		CYP4A22		EIPR1	LAMTOR1	BCO2	ATP2B4	SNX11		ATXN7L3	ATG4A
sp|Q86VP6|CAND1_HUMAN	CAND1	CAND1_HUMAN Cullin-associated NEDD8-dissociated protein 1	16	888.763	729.624	698.75	772.379	905.9	1008.53	891.4	935.277	1.2109	0.0789298	0.276085	1.10276		SPTLC3				MRPS7	FZD2			EFTUD2	LDHAL6A
sp|P42765|THIM_HUMAN	ACAA2	THIM_HUMAN 3-ketoacyl-CoA thiolase, mitochondrial	36	1110.3	1464.73	1373.63	1316.22	1616.77	1477.93	1685.05	1593.25	1.21047	0.0865361	0.275572	1.0628		AWAT2	TMEM199	B4GALNT2	BORCS8	ADHFE1	ADIPOR2	INPP5F	PAOX	AMMECR1	AHSP	HDAC6	LAMTOR2
sp|P54920|SNAA_HUMAN	NAPA	SNAA_HUMAN Alpha-soluble NSF attachment protein	21	882.343	807.749	910.42	866.838	1007.61	1218.09	921.123	1048.94	1.21008	0.122858	0.275099	0.910596										SURF6
sp|P28066|PSA5_HUMAN	PSMA5	PSA5_HUMAN Proteasome subunit alpha type-5	10	799.899	548.362	580.614	642.958	750.374	846.277	735.51	777.387	1.20908	0.194337	0.273908	0.711444										ZNF280A
sp|Q96DV4|RM38_HUMAN	MRPL38	RM38_HUMAN 39S ribosomal protein L38, mitochondrial	11	400.495	497.742	500.482	466.24	519.057	558.929	611.848	563.278	1.20813	0.0843188	0.272775	1.07408							TRGV9			SNAPC2
sp|Q9BYC8|RM32_HUMAN	MRPL32	RM32_HUMAN 39S ribosomal protein L32, mitochondrial	2	37.3912	65.5793	61.5516	54.8407	66.712	68.5537	63.4605	66.2421	1.2079	0.270634	0.272501	0.567618							TRGV3			SMNDC1
sp|Q9NUQ7|UFSP2_HUMAN	UFSP2	UFSP2_HUMAN Ufm1-specific protease 2	5	264.738	306.498	315.696	295.644	358.911	347.557	364.832	357.1	1.20787	0.0203058	0.272466	1.69238
sp|Q9P003|CNIH4_HUMAN	CNIH4	CNIH4_HUMAN Protein cornichon homolog 4	8	186.76	132.032	157.291	158.694	156.56	205.727	212.49	191.592	1.2073	0.237077	0.271787	0.62511						SDHD	HYAL2			GATAD2B	PPIAL4F
sp|Q96TA2|YMEL1_HUMAN	YME1L1	YMEL1_HUMAN ATP-dependent zinc metalloprotease YME1L1	8	327.649	405.372	406.061	379.694	417.709	460.359	497.045	458.371	1.20721	0.0858568	0.271678	1.06623
sp|O43424|GRID2_HUMAN	GRID2	GRID2_HUMAN Glutamate receptor ionotropic, delta-2	1	8.78265	10.7022	9.97773	9.82085	10.075	12.9454	12.5243	11.8482	1.20644	0.127152	0.270751	0.895676							P2RY8			NR6A1
sp|Q08379|GOGA2_HUMAN	GOLGA2	GOGA2_HUMAN Golgin subfamily A member 2	38	1158	1169.99	1252.1	1193.36	1448.32	1505.58	1365.24	1439.71	1.20643	0.00808061	0.270747	2.09256							OR8G5			NOC2L
sp|Q06323-2|PSME1_HUMAN	PSME1	PSME1_HUMAN Isoform 2 of Proteasome activator complex subunit 1	20	1208.8	928.771	926.893	1021.49	1210.79	1399	1086.37	1232.05	1.20614	0.181923	0.270393	0.740113										ZNF330
sp|P54136|SYRC_HUMAN	RARS	SYRC_HUMAN Arginine--tRNA ligase, cytoplasmic	11	499.437	396.48	404.305	433.407	492.213	590.547	485.451	522.737	1.20611	0.132685	0.270362	0.877177										ZNF546
sp|Q9BXV9|CN142_HUMAN	C14orf142	CN142_HUMAN Uncharacterized protein C14orf142	1	43.7662	30.1031	32.1905	35.3532	47.5877	42.6227	37.6489	42.6198	1.20554	0.229381	0.269681	0.639443		SCD5				MRPL37	ERVK-24			DQX1	HSP90AB4P
sp|O75165|DJC13_HUMAN	DNAJC13	DJC13_HUMAN DnaJ homolog subfamily C member 13	14	418.243	404.195	395.115	405.851	500.957	468.045	498.732	489.245	1.20548	0.00267928	0.269605	2.57198							NRXN1			INTS14
sp|P08069|IGF1R_HUMAN	IGF1R	IGF1R_HUMAN Insulin-like growth factor 1 receptor	7	224.099	282.019	239.8	248.639	332.583	271.13	294.316	299.343	1.20392	0.111435	0.267745	0.952978							SCN11A			POLN
sp|O15397|IPO8_HUMAN	IPO8	IPO8_HUMAN Importin-8	8	200.458	169.038	159.97	176.488	225.545	198.964	212.725	212.411	1.20354	0.0680249	0.267288	1.16733							SIRPB1			POP5
sp|Q96TA1|NIBL1_HUMAN	FAM129B	NIBL1_HUMAN Niban-like protein 1	17	630.894	550.758	521.287	567.647	716.043	657.088	674.446	682.526	1.20238	0.0364244	0.265891	1.43861							OR4C46			MED26
tr|H7BZJ3|H7BZJ3_HUMAN	PDIA3	H7BZJ3_HUMAN Thioredoxin (Fragment)	3	37.9569	53.3343	44.5138	45.2683	49.19	67.5402	46.5565	54.4289	1.20236	0.314054	0.265871	0.502995										WEE2
sp|O60499|STX10_HUMAN	STX10	STX10_HUMAN Syntaxin-10	2	76.811	69.8396	78.288	74.9795	89.6855	99.6088	81.139	90.1444	1.20225	0.0630636	0.265742	1.20022
sp|P09471|GNAO_HUMAN	GNAO1	GNAO_HUMAN Guanine nucleotide-binding protein G(o) subunit alpha	2	36.2887	42.7585	41.1451	40.0641	51.4739	50.051	42.9584	48.1611	1.2021	0.0686903	0.265557	1.1631							OR7G1			NKX2-3
sp|Q8IXU6|S35F2_HUMAN	SLC35F2	S35F2_HUMAN Solute carrier family 35 member F2	2	137.332	87.0583	108.612	111.001	122.731	122.985	154.433	133.383	1.20164	0.280846	0.26501	0.551532
sp|Q6DKI1|RL7L_HUMAN	RPL7L1	RL7L_HUMAN 60S ribosomal protein L7-like 1	7	327.724	326.572	369.755	341.35	428.702	401.391	399.526	409.873	1.20074	0.0158818	0.263924	1.7991										ZNF701
sp|Q8TDX6|CGAT1_HUMAN	CSGALNACT1	CGAT1_HUMAN Chondroitin sulfate N-acetylgalactosaminyltransferase 1	3	47.4765	53.8612	49.4991	50.279	62.8623	57.7855	60.3607	60.3361	1.20003	0.0135473	0.263068	1.86815						TIMMDC1	LAT			HEATR1	SH2D2A
sp|Q6YP21|KAT3_HUMAN	CCBL2	KAT3_HUMAN Kynurenine--oxoglutarate transaminase 3	3	108.779	139.476	131.403	126.552	149.223	152.912	153.417	151.851	1.1999	0.0526845	0.26292	1.27832		TMCC1				MTLN	GJA5			EMSY	MFHAS1
sp|P61956|SUMO2_HUMAN	SUMO2	SUMO2_HUMAN Small ubiquitin-related modifier 2	2	140.375	162.427	148.825	150.543	217.164	147.22	177.193	180.526	1.19917	0.231151	0.262033	0.636104
sp|Q9H4K7|MTG2_HUMAN	MTG2	MTG2_HUMAN Mitochondrial ribosome-associated GTPase 2	2	73.3252	96.6506	98.1671	89.381	106.661	100.181	114.593	107.145	1.19874	0.121328	0.261524	0.91604										SRRM1
sp|Q9BYD2|RM09_HUMAN	MRPL9	RM09_HUMAN 39S ribosomal protein L9, mitochondrial	6	268.398	342.966	356.658	322.674	357.905	397.049	405.055	386.67	1.19833	0.108348	0.261024	0.965181							TYRO3			SNURF
sp|Q96LW7|BINCA_HUMAN	C9orf89	BINCA_HUMAN Bcl10-interacting CARD protein	1	33.7348	37.8849	37.5637	36.3945	38.9125	49.9706	41.8803	43.5878	1.19765	0.11365	0.260205	0.944431		SLC35D1				MRPS21	FFAR2			E2F6	KLHL10
sp|Q9UHQ9|NB5R1_HUMAN	CYB5R1	NB5R1_HUMAN NADH-cytochrome b5 reductase 1	8	434.08	559.486	545.87	513.145	622.975	538.433	681.91	614.439	1.1974	0.153195	0.259903	0.814756						UQCRB	LTB4R2			HIST3H3	SULT1A3
sp|P41223|BUD31_HUMAN	BUD31	BUD31_HUMAN Protein BUD31 homolog	1	7.26029	14.3	11.9666	11.1756	14.9497	12.8708	12.3181	13.3796	1.19721	0.377	0.259676	0.423659		RPN2				MRPL23	EPHA1			DNMT3B	HPRT1
sp|Q01082|SPTB2_HUMAN	SPTBN1	SPTB2_HUMAN Spectrin beta chain, non-erythrocytic 1	103	4279.17	5073.28	5261.82	4871.42	5633.99	5782.21	6073.52	5829.9	1.19676	0.042995	0.259129	1.36658
sp|P43003|EAA1_HUMAN	SLC1A3	EAA1_HUMAN Excitatory amino acid transporter 1	3	41.0579	45.1083	43.7143	43.2935	49.3737	55.7149	50.1187	51.7357	1.195	0.022207	0.257011	1.65351
sp|Q96HY7|DHTK1_HUMAN	DHTKD1	DHTK1_HUMAN Probable 2-oxoglutarate dehydrogenase E1 component DHKTD1, mitochondrial	4	148.073	154.083	144.086	148.748	172.135	179.913	181.199	177.749	1.19497	0.00202635	0.256976	2.69329							NEU3			HOXD9	UROD
sp|P49406|RM19_HUMAN	MRPL19	RM19_HUMAN 39S ribosomal protein L19, mitochondrial	12	421.053	548.745	524.941	498.246	590.186	567.77	627.943	595.3	1.19479	0.0867394	0.256757	1.06178							TRDD1			SMARCB1
sp|Q16891-2|IMMT_HUMAN	IMMT	IMMT_HUMAN Isoform 2 of Mitochondrial inner membrane protein	5	234.424	253.508	251.158	246.363	253.336	303.253	326.278	294.289	1.19453	0.098616	0.256447	1.00605							SEMA4G			POLR2M
sp|Q9NQW6|ANLN_HUMAN	ANLN	ANLN_HUMAN Actin-binding protein anillin	5	184.784	138.117	142.813	155.238	183.424	190.479	182.39	185.431	1.1945	0.115323	0.256403	0.938086		ERG28		GNPTAB	SLC7A14	COX4I2	CCR6	WDR81		C2CD4B	CCT2
sp|O43715|TRIA1_HUMAN	TRIAP1	TRIA1_HUMAN TP53-regulated inhibitor of apoptosis 1	1	26.336	36.6904	32.5207	31.849	37.8325	42.4473	33.8455	38.0418	1.19444	0.187671	0.256334	0.726603
sp|P62736|ACTA_HUMAN	ACTA2	ACTA_HUMAN Actin, aortic smooth muscle	76	5236.39	5648.53	4867.93	5250.95	5921.07	6433.28	6460.91	6271.75	1.1944	0.0233195	0.256291	1.63228		CYB5R4		CHST8	DRAM2	ATP5F1B	ANPEP	RAB7B		ASCL1	APOL3	ULK1	SLC38A9
sp|Q6PI48|SYDM_HUMAN	DARS2	SYDM_HUMAN Aspartate--tRNA ligase, mitochondrial	16	583.605	706.816	692.239	660.886	757.341	754.285	854.849	788.825	1.19359	0.0661688	0.255304	1.17935							MAS1			HNF1A	TBK1
sp|O95169|NDUB8_HUMAN	NDUFB8	NDUB8_HUMAN NADH dehydrogenase [ubiquinone] 1 beta subcomplex subunit 8, mitochondrial	5	97.764	126.668	122.776	115.736	121.347	141.089	151.882	138.106	1.19329	0.153591	0.254939	0.813634										TBX19
sp|O95202|LETM1_HUMAN	LETM1	LETM1_HUMAN LETM1 and EF-hand domain-containing protein 1, mitochondrial	36	1389.6	1775.67	1865.13	1676.8	1858.99	2016.05	2122.12	1999.06	1.19219	0.122043	0.253611	0.913486							SMIM1			RBM28
sp|Q14204|DYHC1_HUMAN	DYNC1H1	DYHC1_HUMAN Cytoplasmic dynein 1 heavy chain 1	78	3837.19	3185.93	3092.51	3371.88	3883.87	4273.27	3895.04	4017.39	1.19144	0.0728745	0.252709	1.13742							OR10J1			KDM1B
sp|Q9BZF1|OSBL8_HUMAN	OSBPL8	OSBL8_HUMAN Oxysterol-binding protein-related protein 8	13	307.946	413.33	367.334	362.87	446.14	398.482	452.356	432.326	1.19141	0.117654	0.252666	0.929393										U2SURP
sp|Q9H3P2|NELFA_HUMAN	NELFA	NELFA_HUMAN Negative elongation factor A	6	279.347	196.792	231.361	235.833	258.911	316.921	267.071	280.968	1.19138	0.207239	0.252636	0.683528										TCEANC2
sp|Q13439-5|GOGA4_HUMAN	GOLGA4	GOGA4_HUMAN Isoform 5 of Golgin subfamily A member 4	20	1157.22	1045.17	1054.28	1085.55	1346.15	1294.75	1238.39	1293.1	1.19119	0.0120003	0.252399	1.92081							OR8H2			NOC4L
sp|P22570-7|ADRO_HUMAN	FDXR	ADRO_HUMAN Isoform 7 of NADPH:adrenodoxin oxidoreductase, mitochondrial	11	552.357	661.937	651.402	621.899	711.412	711.243	799.634	740.763	1.19113	0.0598379	0.252332	1.22302							OR51B4			MLLT10
sp|Q9Y6I9|TX264_HUMAN	TEX264	TX264_HUMAN Testis-expressed sequence 264 protein	5	188.656	273.598	246.547	236.267	300.995	234.845	308.115	281.318	1.19068	0.258508	0.251787	0.587526
sp|Q99618|CDCA3_HUMAN	CDCA3	CDCA3_HUMAN Cell division cycle-associated protein 3	2	38.0299	38.6627	36.8663	37.8529	42.364	48.26	44.5251	45.0497	1.19012	0.0161749	0.251112	1.79116		USE1				NNT	GPR176			FAM53A	NLRP12
sp|P56192|SYMC_HUMAN	MARS	SYMC_HUMAN Methionine--tRNA ligase, cytoplasmic	8	335.351	268.328	261.43	288.37	328.273	373.966	326.038	342.759	1.18861	0.12678	0.249276	0.896949							TRAV10			RRP36
sp|Q5SGD2|PPM1L_HUMAN	PPM1L	PPM1L_HUMAN Protein phosphatase 1L	1	49.5155	46.9466	53.9041	50.1221	58.0519	61.2718	59.2768	59.5335	1.18777	0.0136269	0.248255	1.8656										ZNF140
sp|Q9UL46|PSME2_HUMAN	PSME2	PSME2_HUMAN Proteasome activator complex subunit 2	8	651.426	504.998	503.987	553.471	725.766	726.333	518.53	656.876	1.18683	0.289469	0.247115	0.538397										ZNF331
sp|Q5T653|RM02_HUMAN	MRPL2	RM02_HUMAN 39S ribosomal protein L2, mitochondrial	5	190.833	223.684	229.623	214.713	252.457	238.626	273.294	254.792	1.18666	0.0633038	0.24691	1.19857							TRDJ1			SMARCC2
sp|Q16795|NDUA9_HUMAN	NDUFA9	NDUA9_HUMAN NADH dehydrogenase [ubiquinone] 1 alpha subcomplex subunit 9, mitochondrial	14	767.496	911.282	1003.35	894.042	1001.99	1048.01	1131.56	1060.52	1.18621	0.100977	0.246361	0.995779										TATDN1
sp|P49720|PSB3_HUMAN	PSMB3	PSB3_HUMAN Proteasome subunit beta type-3	2	127.401	73.6415	85.5897	95.5442	105.973	104.942	129.044	113.32	1.18604	0.381612	0.246156	0.418378										ZNF282
sp|Q9NVH1|DJC11_HUMAN	DNAJC11	DJC11_HUMAN DnaJ homolog subfamily C member 11	14	599.862	761.026	642.985	667.958	755.258	801.289	819.832	792.126	1.18589	0.074796	0.245974	1.12612							NRN1			INTS10
sp|P42771-4|CD2A1_HUMAN	CDKN2A	CD2A1_HUMAN Isoform 5 of Cyclin-dependent kinase inhibitor 2A, isoforms 1/2/3	1	57.3367	50.1083	53.78	53.7417	62.028	69.8551	59.2436	63.7089	1.18547	0.0586422	0.245454	1.23179						OTC	GPR32			FBH1	NSF
sp|P42166|LAP2A_HUMAN	TMPO	LAP2A_HUMAN Lamina-associated polypeptide 2, isoform alpha	13	377.419	443.435	434.116	418.324	520.978	478.038	488.348	495.788	1.18518	0.0335022	0.245104	1.47493
sp|P13861|KAP2_HUMAN	PRKAR2A	KAP2_HUMAN cAMP-dependent protein kinase type II-alpha regulatory subunit	16	704.154	654.204	653.889	670.749	827.773	787.939	768.624	794.779	1.18491	0.00679049	0.24478	2.1681										ZNF224
sp|Q96JB5|CK5P3_HUMAN	CDK5RAP3	CK5P3_HUMAN CDK5 regulatory subunit-associated protein 3	14	447.864	533.055	527.583	502.834	619.203	567.991	599.653	595.616	1.18452	0.041432	0.2443	1.38266		ZDHHC6				OPA1	GPR27			FANCF	NQO2
sp|P46199|IF2M_HUMAN	MTIF2	IF2M_HUMAN Translation initiation factor IF-2, mitochondrial	6	216.006	275.127	282.049	257.727	306.271	293.027	315.827	305.042	1.18358	0.0976295	0.243163	1.01042										SRSF4
sp|O75063|XYLK_HUMAN	FAM20B	XYLK_HUMAN Glycosaminoglycan xylosylkinase	2	61.4655	63.6857	71.6565	65.6026	74.0803	78.7849	79.9283	77.5978	1.18285	0.0284103	0.242264	1.54652							OR4E1			MEF2A
sp|P49589-3|SYCC_HUMAN	CARS	SYCC_HUMAN Isoform 3 of Cysteine--tRNA ligase, cytoplasmic	5	230.158	176.73	184.808	197.232	234.492	252.287	212.226	233.002	1.18136	0.152343	0.240447	0.817178		STT3B				MT-ND6	GABRR2			ELK4	LYPLA2
sp|Q15418-2|KS6A1_HUMAN	RPS6KA1	KS6A1_HUMAN Isoform 2 of Ribosomal protein S6 kinase alpha-1	4	177.744	139.039	135.107	150.63	165.942	196.083	171.45	177.825	1.18054	0.173851	0.239451	0.759822										ZNF750
sp|Q96SB3|NEB2_HUMAN	PPP1R9B	NEB2_HUMAN Neurabin-2	3	98.8232	118.599	124.88	114.101	133.013	132.671	138.287	134.657	1.18016	0.0632459	0.238985	1.19897										ZNF157
sp|P61086|UBE2K_HUMAN	UBE2K	UBE2K_HUMAN Ubiquitin-conjugating enzyme E2 K	2	54.6821	41.3912	34.1896	43.421	53.69	56.611	43.4254	51.2421	1.18012	0.339145	0.238939	0.469614
sp|Q9NYJ1-2|COA4_HUMAN	COA4	COA4_HUMAN Isoform 2 of Cytochrome c oxidase assembly factor 4 homolog, mitochondrial	2	77.8148	134.029	133.174	115.006	161.017	137.448	108.675	135.714	1.18005	0.436508	0.238854	0.360008						SLC25A14	IL17RC			GMCL1	PRDX1
sp|O14908|GIPC1_HUMAN	GIPC1	GIPC1_HUMAN PDZ domain-containing protein GIPC1	3	76.8537	68.5832	66.941	70.7927	79.8963	94.3177	76.2563	83.4901	1.17936	0.114521	0.238006	0.941114							OR6C75			NFIC
sp|P00846|ATP6_HUMAN	MT-ATP6	ATP6_HUMAN ATP synthase subunit a	1	18.0658	14.4401	22.8559	18.4539	16.2377	21.1261	27.912	21.7586	1.17908	0.472526	0.237659	0.325574										SPEG
sp|P78536|ADA17_HUMAN	ADAM17	ADA17_HUMAN Disintegrin and metalloproteinase domain-containing protein 17	3	77.9252	106.134	98.7646	94.2746	116.941	106.304	110.114	111.12	1.17868	0.134631	0.237174	0.870854		CYP2A7		COG7	GM2A	ATP5ME	AQP9	RASGEF1B		ASXL2	ARHGDIB	ZFYVE1
sp|P16070|CD44_HUMAN	CD44	CD44_HUMAN CD44 antigen	17	1569.61	2099.19	1771.28	1813.36	2173.79	2010.21	2224.93	2136.31	1.17809	0.125854	0.236455	0.900135		TSPO2				NDUFB11	GPM6A			ETS2	NBPF26
sp|Q9NUU6|F105A_HUMAN	FAM105A	F105A_HUMAN Inactive ubiquitin thioesterase FAM105A	4	90.9928	119.197	101.286	103.825	120.223	120.255	126.459	122.312	1.17806	0.0952001	0.236414	1.02136							OR4C12			MED20
sp|Q9Y6M9|NDUB9_HUMAN	NDUFB9	NDUB9_HUMAN NADH dehydrogenase [ubiquinone] 1 beta subcomplex subunit 9	4	149.248	183.171	177.774	170.064	172.339	219.179	209.408	200.309	1.17784	0.163206	0.236142	0.787265										TBX2
sp|Q96Q45-3|TM237_HUMAN	TMEM237	TM237_HUMAN Isoform 3 of Transmembrane protein 237	2	108.071	136.078	136.863	127.004	159.171	143.344	146.003	149.506	1.17718	0.102354	0.235334	0.989897
sp|Q92575|UBXN4_HUMAN	UBXN4	UBXN4_HUMAN UBX domain-containing protein 4	24	738.145	924.099	893.266	851.837	1039.34	948.924	1019.42	1002.56	1.17694	0.0772702	0.235045	1.11199
sp|O14530|TXND9_HUMAN	TXNDC9	TXND9_HUMAN Thioredoxin domain-containing protein 9	1	116.531	84.7913	92.0314	97.7846	113.524	123.939	107.767	115.077	1.17684	0.181581	0.234916	0.740931
sp|Q6VEQ5|WASH2_HUMAN	WASH2P	WASH2_HUMAN WAS protein family homolog 2	2	68.7013	45.0501	49.7173	54.4896	61.3444	69.5883	61.4303	64.121	1.17676	0.280865	0.234816	0.551502
sp|Q9Y3D5|RT18C_HUMAN	MRPS18C	RT18C_HUMAN 28S ribosomal protein S18c, mitochondrial	2	55.2767	71.4944	76.1653	67.6455	72.5235	83.547	82.5673	79.5459	1.17592	0.175762	0.233795	0.755075							UNC93A			SOX15
sp|P07996|TSP1_HUMAN	THBS1	TSP1_HUMAN Thrombospondin-1	4	193.755	182.388	212.188	196.11	215.368	231.571	244.524	230.487	1.1753	0.0468689	0.233023	1.32912
sp|P27695|APEX1_HUMAN	APEX1	APEX1_HUMAN DNA-(apurinic or apyrimidinic site) lyase	2	49.6387	25.6732	28.2991	34.537	40.1001	41.1582	40.4512	40.5698	1.17468	0.471485	0.232264	0.326532		FKBP9		GSAP		CYCS	CD48			CCNB3	CMBL
sp|Q3V6T2|GRDN_HUMAN	CCDC88A	GRDN_HUMAN Girdin	1	182.169	287.528	212.334	227.343	333.249	177.019	290.857	267.042	1.17462	0.518848	0.232191	0.284959		TMEM258				NDUFA12	GJD4			ERCC6	MYLK3
sp|O00264|PGRC1_HUMAN	PGRMC1	PGRC1_HUMAN Membrane-associated progesterone receptor component 1	4	162.446	208.254	203.355	191.352	219.057	211.691	243.398	224.715	1.17436	0.127605	0.231872	0.894131										ZBTB25
sp|Q96AG4|LRC59_HUMAN	LRRC59	LRC59_HUMAN Leucine-rich repeat-containing protein 59	15	735.264	852.472	963.351	850.363	866.412	1022.15	1107.22	998.591	1.17431	0.199235	0.231816	0.700635							TBXA2R			RHOXF2
sp|Q9C0E8|LNP_HUMAN	LNP	LNP_HUMAN Protein lunapark	6	288.567	370.112	343.273	333.984	406.402	362.874	407.267	392.181	1.17425	0.107242	0.231741	0.969635							TAAR8			REC8
sp|O00743-3|PPP6_HUMAN	PPP6C	PPP6_HUMAN Isoform 3 of Serine/threonine-protein phosphatase 6 catalytic subunit	1	39.0225	29.0302	30.4255	32.8261	36.9274	44.3575	34.3212	38.5354	1.17393	0.258309	0.231341	0.587861										ZNF180
sp|P30530|UFO_HUMAN	AXL	UFO_HUMAN Tyrosine-protein kinase receptor UFO	7	179.252	205.799	191.654	192.235	255.816	171.236	249.943	225.665	1.1739	0.303305	0.23131	0.51812		PIGA		TMEM87A		LACTB	CPLX4			DBF4	FXR1
sp|Q9NYU2|UGGG1_HUMAN	UGGT1	UGGG1_HUMAN UDP-glucose:glycoprotein glucosyltransferase 1	59	2653.71	3311.79	2934.55	2966.69	3505.71	3194.52	3747.45	3482.56	1.17389	0.106927	0.231297	0.970913
sp|O43760|SNG2_HUMAN	SYNGR2	SNG2_HUMAN Synaptogyrin-2	1	14.7021	10.411	15.4577	13.5236	13.5162	17.2888	16.8097	15.8716	1.17362	0.298918	0.230964	0.524448
sp|P41091|IF2G_HUMAN	EIF2S3	IF2G_HUMAN Eukaryotic translation initiation factor 2 subunit 3	2	95.3445	58.1581	72.9777	75.4934	89.9216	84.1909	91.5131	88.5419	1.17284	0.302493	0.230008	0.519284							OR1A2			L3MBTL1
sp|Q96F07|CYFP2_HUMAN	CYFIP2	CYFP2_HUMAN Cytoplasmic FMR1-interacting protein 2	3	176.808	154.593	152.516	161.306	184.541	194.052	188.564	189.052	1.17201	0.0282054	0.228988	1.54967						USP30	LY6L			HMGA1	SULT2A1
sp|O15357|SHIP2_HUMAN	INPPL1	SHIP2_HUMAN Phosphatidylinositol 3,4,5-trisphosphate 5-phosphatase 2	10	470.433	356.36	319.209	382.001	492.627	455.289	395.195	447.704	1.172	0.287693	0.228969	0.54107							SHISA9			POLR3K
sp|Q9HBH5|RDH14_HUMAN	RDH14	RDH14_HUMAN Retinol dehydrogenase 14	4	108.94	126.208	124.175	119.774	139.262	133.243	148.413	140.306	1.17142	0.0428605	0.228261	1.36794										ZNF580
sp|P55268|LAMB2_HUMAN	LAMB2	LAMB2_HUMAN Laminin subunit beta-2	1	22.7809	17.1191	14.9401	18.28	20.7868	21.9038	21.5478	21.4128	1.17138	0.255019	0.228206	0.593428							SLC6A13			RAD50
sp|O00165-2|HAX1_HUMAN	HAX1	HAX1_HUMAN Isoform 2 of HCLS1-associated protein X-1	7	187.286	246.787	227.687	220.587	255.233	255.982	263.845	258.354	1.17121	0.100527	0.228	0.997716							PCDHB14			OLIG3
sp|Q7Z6Z7|HUWE1_HUMAN	HUWE1	HUWE1_HUMAN E3 ubiquitin-protein ligase HUWE1	27	1031.5	889.31	846.118	922.31	1040.64	1182.92	1014.04	1079.2	1.17011	0.110285	0.226641	0.957483							RIT1			PNISR
sp|Q4VC31|CCD58_HUMAN	CCDC58	CCD58_HUMAN Coiled-coil domain-containing protein 58	2	49.4012	65.8477	61.5878	58.9456	64.7699	76.116	66.0062	68.9641	1.16996	0.175815	0.226462	0.754944		TMEM208				NDUFA1	GJC3			ERCC3	MTR
sp|Q9H0N5|PHS2_HUMAN	PCBD2	PHS2_HUMAN Pterin-4-alpha-carbinolamine dehydratase 2	1	11.2406	14.4062	14.7885	13.4784	15.3071	16.7787	15.1777	15.7545	1.16887	0.139363	0.225113	0.855853										UTY
sp|Q6UW56-3|ARAID_HUMAN	ATRAID	ARAID_HUMAN Isoform 3 of All-trans retinoic acid-induced differentiation factor	2	61.5916	65.3062	64.6999	63.8659	75.5617	78.8195	69.5211	74.6341	1.16861	0.0219342	0.224789	1.65888		PDIA2		TMED9		IFI6	CNTN2			CUX1	FDPS
sp|Q14696|MESD_HUMAN	MESDC2	MESD_HUMAN LDLR chaperone MESD	9	360.785	558.151	495.088	471.342	583.466	471.199	597.214	550.626	1.16821	0.324093	0.224301	0.489331							TRAV5			SATB2
sp|Q96EY7|PTCD3_HUMAN	PTCD3	PTCD3_HUMAN Pentatricopeptide repeat domain-containing protein 3, mitochondrial	23	806.126	1143.08	1084.68	1011.3	1191.38	1113.51	1237.56	1180.82	1.16763	0.198413	0.223581	0.702429										ZNF33A
sp|Q9HB71|CYBP_HUMAN	CACYBP	CYBP_HUMAN Calcyclin-binding protein	11	612.004	388.284	423.204	474.497	522.904	595.697	543.463	554.022	1.1676	0.335982	0.223542	0.473684		SLN				MRPS26	FPR2			EBF1	KRT25
sp|Q9NQT5|EXOS3_HUMAN	EXOSC3	EXOS3_HUMAN Exosome complex component RRP40	1	15.0397	16.285	15.4985	15.6077	17.2682	20.0667	17.3351	18.2233	1.16758	0.0576207	0.223527	1.23942							OR2W5			MDC1
sp|Q15771|RAB30_HUMAN	RAB30	RAB30_HUMAN Ras-related protein Rab-30	1	18.3908	18.3146	20.7241	19.1432	20.5865	23.4259	23.0093	22.3405	1.16702	0.0544506	0.222835	1.264										ZNF480
sp|P54760|EPHB4_HUMAN	EPHB4	EPHB4_HUMAN Ephrin type-B receptor 4	1	20.8261	30.8077	26.0985	25.9107	31.1595	30.0562	29.4739	30.2298	1.16669	0.213834	0.222422	0.669922							OR2G2			MAB21L1
sp|Q9BSC4|NOL10_HUMAN	NOL10	NOL10_HUMAN Nucleolar protein 10	1	62.0305	58.3434	65.2721	61.882	78.1575	63.3153	74.8237	72.0988	1.1651	0.106503	0.220456	0.972638										TFDP2
sp|O75367|H2AY_HUMAN	H2AFY	H2AY_HUMAN Core histone macro-H2A.1	8	310.37	197.233	216.573	241.392	259.571	312.538	271.544	281.218	1.16498	0.35873	0.220311	0.445232							PCDHA4			NUP37
sp|Q96KC8|DNJC1_HUMAN	DNAJC1	DNJC1_HUMAN DnaJ homolog subfamily C member 1	6	194.116	217.171	233.194	214.827	244.409	236.778	269.49	250.226	1.16478	0.0782313	0.220056	1.10662							NPY5R			INSM1
sp|O60266|ADCY3_HUMAN	ADCY3	ADCY3_HUMAN Adenylate cyclase type 3	3	91.6399	100.617	95.3622	95.8732	115.208	110.971	108.753	111.644	1.1645	0.00805451	0.219708	2.09396		CYP2C9		COPE	HEXA	ATP5PB	ART4	RUFY1		ATF1	ARL14EP
sp|P46939-2|UTRO_HUMAN	UTRN	UTRO_HUMAN Isoform 2 of Utrophin	8	275.44	335.589	341.926	317.652	366.967	358.77	381.86	369.199	1.16228	0.0813061	0.216954	1.08988
sp|Q9H078|CLPB_HUMAN	CLPB	CLPB_HUMAN Caseinolytic peptidase B protein homolog	24	931.431	1211.11	1216.32	1119.62	1273.18	1269.91	1358.19	1300.43	1.16149	0.140136	0.215979	0.85345						RPUSD3	HRH3			FUS	PLCXD3
sp|O00592|PODXL_HUMAN	PODXL	PODXL_HUMAN Podocalyxin	24	1764.39	1609.55	1489.76	1621.23	1926.89	1875.51	1844.94	1882.45	1.16112	0.0346227	0.215517	1.46064										ZIM3
sp|Q8IYS2-2|K2013_HUMAN	KIAA2013	K2013_HUMAN Isoform 2 of Uncharacterized protein KIAA2013	4	182.952	178.516	194.431	185.3	217.739	219.013	208.525	215.092	1.16078	0.00672096	0.215097	2.17257							SLC38A1			PRR13
sp|O94973-2|AP2A2_HUMAN	AP2A2	AP2A2_HUMAN Isoform 2 of AP-2 complex subunit alpha-2	1	17.2147	18.408	17.0064	17.543	21.8376	16.8392	22.402	20.3596	1.16055	0.196809	0.214812	0.705956		FICD		GORAB		CPT1B	CD300LF			CCDC106	CIAO1
sp|Q9BUR5|APOO_HUMAN	APOO	APOO_HUMAN Apolipoprotein O	2	108.706	141.908	139.014	129.876	135.537	158.444	158.164	150.715	1.16045	0.185573	0.214687	0.731484		FOXRED2		HS3ST6		DAP3	CD82			CCNL2	CRABP1
sp|Q9Y3F4|STRAP_HUMAN	STRAP	STRAP_HUMAN Serine-threonine kinase receptor-associated protein	8	360.287	300.294	298.191	319.591	371.504	390.234	350.847	370.862	1.16043	0.0927955	0.214655	1.03247
sp|Q14197|ICT1_HUMAN	ICT1	ICT1_HUMAN Peptidyl-tRNA hydrolase ICT1, mitochondrial	6	174.762	224.865	232.644	210.757	233.502	237.412	262.642	244.519	1.16019	0.171719	0.214365	0.76518							RTN4RL1			POGK
sp|Q96KP1|EXOC2_HUMAN	EXOC2	EXOC2_HUMAN Exocyst complex component 2	1	43.7782	34.289	33.3086	37.1252	43.651	47.3187	38.239	43.0696	1.16012	0.234871	0.214269	0.62917							OR2T6			MCM3
sp|Q9H814|PHAX_HUMAN	PHAX	PHAX_HUMAN Phosphorylated adapter RNA export protein	1	54.9514	41.7687	48.2942	48.3381	56.0304	60.8751	51.2646	56.0567	1.15968	0.176568	0.213726	0.753087										ZBTB32
sp|P54098|DPOG1_HUMAN	POLG	DPOG1_HUMAN DNA polymerase subunit gamma-1	3	78.8831	76.998	73.8986	76.5932	91.2959	90.5857	84.5606	88.8141	1.15955	0.00910664	0.213571	2.04064										ZMAT5
sp|Q9BWM7|SFXN3_HUMAN	SFXN3	SFXN3_HUMAN Sideroflexin-3	10	370.452	496.638	443.148	436.746	481.391	476.165	560.236	505.931	1.15841	0.203579	0.212146	0.691267
sp|Q9UGC7|RF1ML_HUMAN	MTRF1L	RF1ML_HUMAN Peptide chain release factor 1-like, mitochondrial	1	12.248	12.5697	11.2054	12.0077	14.0364	12.6305	15.0549	13.9072	1.15819	0.0800783	0.211877	1.09649										SRSF9
sp|Q9H910|HN1L_HUMAN	HN1L	HN1L_HUMAN Hematological and neurological expressed 1-like protein	1	42.4663	27.7142	29.9291	33.3699	37.9788	44.6196	33.2871	38.6285	1.15759	0.404547	0.211119	0.393031							PLXNA4			PCGF2
sp|P40261|NNMT_HUMAN	NNMT	NNMT_HUMAN Nicotinamide N-methyltransferase	3	64.4279	51.7263	50.5611	55.5717	65.8959	71.9337	55.1081	64.3126	1.15729	0.257722	0.210749	0.588848										TFAP2B
sp|Q9Y512|SAM50_HUMAN	SAMM50	SAM50_HUMAN Sorting and assembly machinery component 50 homolog	20	777.872	970.662	833.319	860.618	949.757	967.865	1069.02	995.547	1.15678	0.119282	0.210116	0.923425										ZNF821
sp|Q8TAD4|ZNT5_HUMAN	SLC30A5	ZNT5_HUMAN Zinc transporter 5	3	139.903	123.839	131.249	131.664	150.273	156.238	150.219	152.243	1.1563	0.0151938	0.209517	1.81833
sp|Q14BN4|SLMAP_HUMAN	SLMAP	SLMAP_HUMAN Sarcolemmal membrane-associated protein	6	153.957	162.835	186.845	167.879	193.273	187.812	200.675	193.92	1.15512	0.0683205	0.20804	1.16545
sp|Q15031|SYLM_HUMAN	LARS2	SYLM_HUMAN Probable leucine--tRNA ligase, mitochondrial	29	1170.41	1391.23	1435.02	1332.22	1535.01	1454.86	1626.7	1538.86	1.15511	0.097113	0.208028	1.01272							SLCO1A2			RBBP4
sp|Q6UW63|KDEL1_HUMAN	KDELC1	KDEL1_HUMAN KDEL motif-containing protein 1	9	199.099	257.871	229.864	228.945	259.374	249.375	284.184	264.311	1.15448	0.149825	0.207238	0.824415							SLC26A1			PRKDC
sp|Q96GW9|SYMM_HUMAN	MARS2	SYMM_HUMAN Methionine--tRNA ligase, mitochondrial	6	190.706	230.438	230.326	217.157	244.626	247.396	259.796	250.606	1.15403	0.0755602	0.206685	1.12171							TRAV12-1			RRP8
sp|Q9GZR7|DDX24_HUMAN	DDX24	DDX24_HUMAN ATP-dependent RNA helicase DDX24	2	49.5817	47.8209	59.2087	52.2038	61.4273	56.1607	62.9515	60.1798	1.15279	0.12318	0.205126	0.909461							MOG			HOXA3	TRIM34
sp|Q00610|CLH1_HUMAN	CLTC	CLH1_HUMAN Clathrin heavy chain 1	85	3328.9	3494.68	3437.36	3420.32	3816.21	3931.67	4079.8	3942.56	1.15269	0.00446848	0.205004	2.34984						SDHAF1	HTR2C			GATA3	PNPLA1
sp|Q9Y676|RT18B_HUMAN	MRPS18B	RT18B_HUMAN 28S ribosomal protein S18b, mitochondrial	3	68.2034	86.1475	93.8073	82.7194	88.1687	97.4299	100.292	95.2968	1.15205	0.20969	0.204201	0.678422							UNC5D			SOX14
sp|Q6PJT7|ZC3HE_HUMAN	ZC3H14	ZC3HE_HUMAN Zinc finger CCCH domain-containing protein 14	10	252.078	274.769	309.138	278.662	342.124	306.324	314.626	321.024	1.15202	0.0991703	0.204169	1.00362
sp|Q9Y697|NFS1_HUMAN	NFS1	NFS1_HUMAN Cysteine desulfurase, mitochondrial	12	482.141	625.627	585.086	564.285	637.704	656.838	655.443	649.995	1.15189	0.117936	0.204005	0.928355										TCF4
sp|Q8TAE8|G45IP_HUMAN	GADD45GIP1	G45IP_HUMAN Growth arrest and DNA damage-inducible proteins-interacting protein 1	6	228.445	296.821	320.561	281.942	297.608	323.611	352.714	324.645	1.15146	0.25135	0.203461	0.599721							OR5B12			NABP1
sp|O75122|CLAP2_HUMAN	CLASP2	CLAP2_HUMAN CLIP-associating protein 2	2	112.277	88.1779	80.0873	93.514	111.755	107.66	103.516	107.644	1.1511	0.228848	0.203009	0.640453						PRODH	GYPC			FOXN2	PGD
sp|O96000|NDUBA_HUMAN	NDUFB10	NDUBA_HUMAN NADH dehydrogenase [ubiquinone] 1 beta subcomplex subunit 10	5	174.551	210.058	197.174	193.928	201.399	232.422	235.782	223.201	1.15095	0.124246	0.202825	0.905719										TBL3
sp|P50748|KNTC1_HUMAN	KNTC1	KNTC1_HUMAN Kinetochore-associated protein 1	2	43.7177	37.0687	40.8102	40.5322	45.6798	48.017	46.1812	46.626	1.15034	0.0411196	0.202066	1.38595							SLC46A2			PURB
sp|O43264|ZW10_HUMAN	ZW10	ZW10_HUMAN Centromere/kinetochore protein zw10 homolog	2	49.0575	56.2491	57.0528	54.1198	65.4121	60.1189	61.1031	62.2114	1.14951	0.0551154	0.201021	1.25873
sp|P49721|PSB2_HUMAN	PSMB2	PSB2_HUMAN Proteasome subunit beta type-2	2	72.2036	51.5508	54.1353	59.2965	54.6289	80.2673	69.5064	68.1342	1.14904	0.421262	0.200431	0.375448										ZNF281
sp|O75410-2|TACC1_HUMAN	TACC1	TACC1_HUMAN Isoform 2 of Transforming acidic coiled-coil-containing protein 1	11	312.992	270.006	271.289	284.762	360.077	311.298	309.912	327.096	1.14866	0.123005	0.199955	0.910077
sp|O94826|TOM70_HUMAN	TOMM70A	TOM70_HUMAN Mitochondrial import receptor subunit TOM70	45	2271.57	2655.14	2718.57	2548.42	2662.82	2923.6	3190.34	2925.59	1.148	0.141973	0.19912	0.847794
sp|Q5T9L3-2|WLS_HUMAN	WLS	WLS_HUMAN Isoform 2 of Protein wntless homolog	8	291.712	303.489	345.272	313.491	333.527	378.577	367.281	359.795	1.1477	0.0937301	0.198752	1.02812
sp|Q6PD62|CTR9_HUMAN	CTR9	CTR9_HUMAN RNA polymerase-associated protein CTR9 homolog	1	22.3986	14.1598	16.8272	17.7952	18.7548	22.5119	19.9997	20.4221	1.14762	0.380361	0.198647	0.419804						TRIM14	LPAR4			HINFP	SPRR2D
sp|Q9H8H0|NOL11_HUMAN	NOL11	NOL11_HUMAN Nucleolar protein 11	3	88.0567	90.0107	95.7679	91.2785	109.17	100.982	104.039	104.73	1.14737	0.0155508	0.198333	1.80825										TFE3
sp|Q9GZT8|GTPC1_HUMAN	NIF3L1	GTPC1_HUMAN Putative GTP cyclohydrolase 1 type 2 NIF3L1	2	47.0777	50.2625	54.5241	50.6214	60.0217	52.8619	61.3251	58.0696	1.14713	0.0937693	0.198034	1.02794										TEAD2
sp|Q6P1N0|C2D1A_HUMAN	CC2D1A	C2D1A_HUMAN Coiled-coil and C2 domain-containing protein 1A	3	71.3615	51.1384	49.6628	57.3876	65.4004	69.9473	62.0618	65.8032	1.14665	0.316847	0.19742	0.49915		TM7SF2				MTHFD2	GIPR			EMD	ME1
sp|P07203|GPX1_HUMAN	GPX1	GPX1_HUMAN Glutathione peroxidase 1	2	20.9091	26.159	27.2884	24.7855	26.6821	28.7615	29.8145	28.4194	1.14661	0.169355	0.197379	0.771203							P2RY12			NR2F1
sp|P63165|SUMO1_HUMAN	SUMO1	SUMO1_HUMAN Small ubiquitin-related modifier 1	5	681.629	801.326	867.815	783.59	1000.84	871.857	822.541	898.414	1.14654	0.205894	0.197281	0.686356
sp|Q14697-2|GANAB_HUMAN	GANAB	GANAB_HUMAN Isoform 2 of Neutral alpha-glucosidase AB	67	3454.71	4857.44	3940.18	4084.11	4934.64	3886.91	5224.83	4682.13	1.14642	0.359403	0.197142	0.444418							OR5F1			NAP1L5
sp|Q96A73|P33MX_HUMAN	KIAA1191	P33MX_HUMAN Putative monooxygenase p33MONOX	2	51.4665	45.3422	48.789	48.5326	54.4787	57.0889	55.3339	55.6338	1.14632	0.021283	0.197009	1.67197							SLC2A7			PRPF40A
sp|Q96ND0|F210A_HUMAN	FAM210A	F210A_HUMAN Protein FAM210A	5	289.191	407.074	362.514	352.926	409.214	399.971	404.065	404.417	1.1459	0.209531	0.196475	0.678751							OR4E2			MEF2B
sp|Q9NT62|ATG3_HUMAN	ATG3	ATG3_HUMAN Ubiquitin-like-conjugating enzyme ATG3	4	142.406	120.436	121.011	127.951	146.137	154.341	139.227	146.568	1.14551	0.0922277	0.195984	1.03514		LNPK		SLC30A7		GATD3B	CHRND			CIART	DZIP3
sp|Q9UKS6|PACN3_HUMAN	PACSIN3	PACN3_HUMAN Protein kinase C and casein kinase substrate in neurons protein 3	9	405.514	396.953	395.967	399.478	442.419	464.06	465.68	457.387	1.14496	0.00201388	0.195299	2.69597										USB1
sp|Q92665|RT31_HUMAN	MRPS31	RT31_HUMAN 28S ribosomal protein S31, mitochondrial	13	431.949	508.646	503.119	481.238	517.828	564.164	570.581	550.858	1.14467	0.0794808	0.194929	1.09974							VN1R5			SOX9
sp|Q9NQR4|NIT2_HUMAN	NIT2	NIT2_HUMAN Omega-amidase NIT2	4	130.861	138.807	147.761	139.143	165.264	136.667	175.762	159.231	1.14437	0.187782	0.194552	0.726347										TERB1
sp|Q9H300|PARL_HUMAN	PARL	PARL_HUMAN Presenilins-associated rhomboid-like protein, mitochondrial	2	44.3362	51.0203	50.1345	48.497	54.0975	54.4205	57.9282	55.4821	1.14403	0.0451858	0.194126	1.345										UTP14A
sp|Q9Y6A1|POMT1_HUMAN	POMT1	POMT1_HUMAN Protein O-mannosyl-transferase 1	3	154.389	203.037	202.098	186.508	212.082	195.487	232.211	213.26	1.14344	0.23705	0.193375	0.62516										ZMYM5
sp|Q96CW1|AP2M1_HUMAN	AP2M1	AP2M1_HUMAN AP-2 complex subunit mu	12	585.243	640.652	618.667	614.854	695.99	711.078	701.564	702.878	1.14316	0.0062081	0.193029	2.20704		FITM2		GORASP2		CRLS1	CD3D			CCDC174	CIT
sp|Q6YN16|HSDL2_HUMAN	HSDL2	HSDL2_HUMAN Hydroxysteroid dehydrogenase-like protein 2	26	1758.39	2076.62	2199.59	2011.53	2413.5	2127.81	2353.08	2298.13	1.14248	0.143128	0.192164	0.844277							PVRIG			PIMREG
sp|P50416|CPT1A_HUMAN	CPT1A	CPT1A_HUMAN Carnitine O-palmitoyltransferase 1, liver isoform	27	973.737	1239.43	1158.41	1123.86	1274.53	1207.09	1369.1	1283.57	1.14211	0.15616	0.1917	0.806431						TFB1M	KIR2DS5			H2BC4	SCRN1
sp|Q4J6C6|PPCEL_HUMAN	PREPL	PPCEL_HUMAN Prolyl endopeptidase-like	2	85.6428	90.565	83.449	86.5523	99.5399	101.085	95.9199	98.8483	1.14206	0.00913148	0.191645	2.03946										ZNF215
sp|Q7Z4H8|KDEL2_HUMAN	KDELC2	KDEL2_HUMAN KDEL motif-containing protein 2	3	66.0339	85.4197	79.6515	77.035	84.5475	85.5283	93.5676	87.8811	1.14079	0.166311	0.190039	0.77908							SLC26A2			PRKRIP1
sp|Q9UL25|RAB21_HUMAN	RAB21	RAB21_HUMAN Ras-related protein Rab-21	9	451.037	439.165	346.173	412.125	429.328	502.758	478.241	470.109	1.1407	0.216604	0.189913	0.664333										ZNF469
sp|Q96T51|RUFY1_HUMAN	RUFY1	RUFY1_HUMAN RUN and FYVE domain-containing protein 1	10	354.044	319.813	304.299	326.052	383.749	386.997	344.954	371.9	1.14062	0.0831975	0.189813	1.07989										ZNF793
sp|P82650|RT22_HUMAN	MRPS22	RT22_HUMAN 28S ribosomal protein S22, mitochondrial	20	803.273	965.505	1018.17	928.984	1010.93	1055.04	1112.3	1059.43	1.14041	0.140113	0.189557	0.853521							VANGL2			SOX2
sp|Q9Y3D3|RT16_HUMAN	MRPS16	RT16_HUMAN 28S ribosomal protein S16, mitochondrial	4	355.723	510.074	421.809	429.202	479.999	500.147	487.751	489.299	1.14002	0.253474	0.18906	0.596067							UNC5A			SOX11
sp|P14735|IDE_HUMAN	IDE	IDE_HUMAN Insulin-degrading enzyme	3	67.8355	69.3674	78.0752	71.7594	77.794	78.8787	88.7038	81.7922	1.13981	0.100329	0.188796	0.998574							RTN4RL2			POLA2
sp|Q9NVS2-2|RT18A_HUMAN	MRPS18A	RT18A_HUMAN Isoform 2 of 28S ribosomal protein S18a, mitochondrial	3	145.649	190.28	179.113	171.681	189.25	191.125	206.609	195.661	1.13968	0.173348	0.188632	0.761081							UNC5C			SOX13
sp|Q07960|RHG01_HUMAN	ARHGAP1	RHG01_HUMAN Rho GTPase-activating protein 1	9	312.564	281.605	267.831	287.334	337.635	340.194	304.469	327.433	1.13956	0.0841036	0.188473	1.07519		HCRT		MGAT1		DMGDH	CDH23			CDT1	CTH
sp|Q8NE86|MCU_HUMAN	MCU	MCU_HUMAN Calcium uniporter protein, mitochondrial	8	448.675	520.694	483.48	484.283	523.809	551.462	578.087	551.119	1.13801	0.062177	0.186515	1.20637							TRAV30			SALL3
sp|P36776|LONM_HUMAN	LONP1	LONM_HUMAN Lon protease homolog, mitochondrial	57	2131.39	2899.58	2605.21	2545.39	2979.81	2682.85	3024.79	2895.82	1.13767	0.230767	0.186081	0.636826							TACR2			REPIN1
sp|Q9Y570|PPME1_HUMAN	PPME1	PPME1_HUMAN Protein phosphatase methylesterase 1	3	92.5374	76.3712	78.9062	82.6049	91.9395	105.102	84.7235	93.9217	1.137	0.220274	0.185231	0.657036										ZNF141
sp|Q9NYK5|RM39_HUMAN	MRPL39	RM39_HUMAN 39S ribosomal protein L39, mitochondrial	17	1228.22	1316.79	1647.28	1397.43	1608.8	1486.86	1669.14	1588.27	1.13656	0.239806	0.184677	0.62014							TRHR			SNAPC3
sp|Q9UIA9|XPO7_HUMAN	XPO7	XPO7_HUMAN Exportin-7	4	219.366	225.46	183.2	209.342	239.038	258.187	216.513	237.913	1.13648	0.184913	0.184572	0.733033
sp|Q8TAA5|GRPE2_HUMAN	GRPEL2	GRPE2_HUMAN GrpE protein homolog 2, mitochondrial	1	48.2103	61.9521	58.5273	56.2299	61.0062	68.9038	61.7512	63.8871	1.13618	0.188564	0.184186	0.724542							PAQR5			NRM
sp|Q9NP92|RT30_HUMAN	MRPS30	RT30_HUMAN 28S ribosomal protein S30, mitochondrial	8	324.118	375.242	378.929	359.43	371.138	416.748	436.797	408.228	1.13577	0.136821	0.183665	0.863847							VN1R4			SOX8
sp|P07951|TPM2_HUMAN	TPM2	TPM2_HUMAN Tropomyosin beta chain	8	422.293	297.146	364.765	361.401	365.982	505.752	359.501	410.412	1.13561	0.458938	0.183471	0.338246
sp|P49585|PCY1A_HUMAN	PCYT1A	PCY1A_HUMAN Choline-phosphate cytidylyltransferase A	17	797.288	680.711	720.327	732.776	903.013	837.827	755.234	832.025	1.13544	0.144184	0.183255	0.841084										WAC
sp|Q8N841|TTLL6_HUMAN	TTLL6	TTLL6_HUMAN Tubulin polyglutamylase TTLL6	1	14.9222	14.0865	16.2581	15.0889	21.0329	13.3942	16.9435	17.1235	1.13484	0.425553	0.182489	0.371046
sp|Q06136|KDSR_HUMAN	KDSR	KDSR_HUMAN 3-ketodihydrosphingosine reductase	3	59.8504	64.3042	69.3888	64.5144	74.4539	78.2644	66.8104	73.1762	1.13426	0.117366	0.181753	0.930457							SLC27A6			PRMT6
sp|Q9BXK5|B2L13_HUMAN	BCL2L13	B2L13_HUMAN Bcl-2-like protein 13	22	852.236	1044.09	942.286	946.203	1074.02	1044.48	1099.47	1072.66	1.13364	0.0933335	0.180965	1.02996		POR		YIPF2		MICOS10	DLL1			DEDD2	GSTA1
sp|O95219|SNX4_HUMAN	SNX4	SNX4_HUMAN Sorting nexin-4	2	38.5806	40.3186	34.0856	37.6616	46.441	41.8498	39.7557	42.6822	1.13331	0.137617	0.180539	0.861327
sp|Q92609-2|TBCD5_HUMAN	TBC1D5	TBCD5_HUMAN Isoform 2 of TBC1 domain family member 5	3	122.307	98.6854	101.535	107.509	124.558	125.498	115.147	121.734	1.13232	0.155652	0.179277	0.807846
sp|Q8NBP0|TTC13_HUMAN	TTC13	TTC13_HUMAN Tetratricopeptide repeat protein 13	2	49.9623	58.7575	62.5612	57.0937	64.5171	60.9057	68.4957	64.6395	1.13217	0.156135	0.179086	0.8065
sp|Q13608|PEX6_HUMAN	PEX6	PEX6_HUMAN Peroxisome assembly factor 2	3	39.8365	45.9368	47.7857	44.5197	48.9597	49.4404	52.797	50.399	1.13206	0.0939706	0.178952	1.02701										ZBED6
sp|P26885|FKBP2_HUMAN	FKBP2	FKBP2_HUMAN Peptidyl-prolyl cis-trans isomerase FKBP2	6	397.867	456.61	399.902	418.126	365.301	489.841	564.312	473.151	1.1316	0.419158	0.178364	0.377623							OR51Q1			MPHOSPH10
sp|Q9H488|OFUT1_HUMAN	POFUT1	OFUT1_HUMAN GDP-fucose protein O-fucosyltransferase 1	10	531.769	835.089	679.335	682.064	787.218	676.039	851.616	771.625	1.13131	0.427338	0.177991	0.369228										ZKSCAN1
sp|P35251|RFC1_HUMAN	RFC1	RFC1_HUMAN Replication factor C subunit 1	1	41.5957	40.5714	42.8628	41.6766	46.0478	46.1274	49.2409	47.1387	1.13106	0.0117371	0.177673	1.93044										ZNF587B
sp|Q13618|CUL3_HUMAN	CUL3	CUL3_HUMAN Cullin-3	2	52.4112	48.9783	45.3695	48.9197	54.3862	55.419	56.1565	55.3206	1.13085	0.037928	0.177401	1.42104						TWNK	LRRC4B			HIST1H4G	SRP9
sp|P62495|ERF1_HUMAN	ETF1	ERF1_HUMAN Eukaryotic peptide chain release factor subunit 1	6	272.537	190.521	213.686	225.582	263.078	236.036	266.084	255.066	1.1307	0.323633	0.17722	0.489947							OR2T27			MBD3L1
sp|P07814|SYEP_HUMAN	EPRS	SYEP_HUMAN Bifunctional glutamate/proline--tRNA ligase	35	1762.17	1369.83	1469.73	1533.91	1710.54	1882.52	1606.83	1733.3	1.12998	0.234465	0.176302	0.629921							OR2I1P			MAFB
sp|Q6NVY1|HIBCH_HUMAN	HIBCH	HIBCH_HUMAN 3-hydroxyisobutyryl-CoA hydrolase, mitochondrial	15	901.739	1109.5	1111.36	1040.87	1334.28	966.978	1227.22	1176.16	1.12998	0.354657	0.176297	0.450191							PCDHGA6			PAGR1
sp|P32004|L1CAM_HUMAN	L1CAM	L1CAM_HUMAN Neural cell adhesion molecule L1	36	1621.01	2023.31	1769.52	1804.62	2188.26	1778.53	2150.14	2038.98	1.12987	0.253157	0.176154	0.59661							SLC52A2			R3HDM2
sp|Q9UKG1|DP13A_HUMAN	APPL1	DP13A_HUMAN DCC-interacting protein 13-alpha	1	44.1758	37.1778	35.1652	38.8396	43.6979	47.7546	40.1803	43.8776	1.12971	0.223364	0.175956	0.650988		G6PC3		JAKMIP3		DECR1	CD8B2			CDC14B	CRIP3
sp|Q8IUD2|RB6I2_HUMAN	ERC1	RB6I2_HUMAN ELKS/Rab6-interacting/CAST family member 1	3	75.9139	64.0786	66.5708	68.8544	79.3847	77.3061	76.6227	77.7712	1.1295	0.0733942	0.175686	1.13434							OR2L2			MAGOHB
sp|Q8NEY8-2|PPHLN_HUMAN	PPHLN1	PPHLN_HUMAN Isoform 2 of Periphilin-1	4	187.413	234.995	230.812	217.74	276.813	213.81	246.95	245.858	1.12913	0.301409	0.175216	0.520843										ZNF12
sp|Q00325|MPCP_HUMAN	SLC25A3	MPCP_HUMAN Phosphate carrier protein, mitochondrial	14	915.455	1251.84	1155.55	1107.61	1139.18	1314.49	1296.5	1250.06	1.1286	0.281309	0.174539	0.550817
sp|Q96HP4|OXND1_HUMAN	OXNAD1	OXND1_HUMAN Oxidoreductase NAD-binding domain-containing protein 1	1	39.1127	53.6475	61.0607	51.2736	58.2915	53.8604	61.391	57.8476	1.12821	0.388809	0.174041	0.410263										UBOX5
sp|P19256|LFA3_HUMAN	CD58	LFA3_HUMAN Lymphocyte function-associated antigen 3	5	333.174	412.099	363.933	369.735	428.884	402.939	418.468	416.764	1.12719	0.123595	0.172736	0.908		TXNDC5				NDUFB6	GPR12			ETV4	NBPF7
sp|Q9GZU8|F192A_HUMAN	FAM192A	F192A_HUMAN Protein FAM192A	2	42.7843	26.9155	25.9833	31.8943	30.9128	39.8721	37.0272	35.9374	1.12676	0.541089	0.172185	0.266731							OR4D6			MED8
sp|P49674|KC1E_HUMAN	CSNK1E	KC1E_HUMAN Casein kinase I isoform epsilon	1	69.087	40.6333	48.928	52.8828	56.8723	66.0338	55.8136	59.5732	1.12652	0.50078	0.171867	0.300353						TMEM11	LAX1			HELT	SH3GLB2
sp|Q9BT09|CNPY3_HUMAN	CNPY3	CNPY3_HUMAN Protein canopy homolog 3	8	527.706	584.481	516.401	542.863	618.197	542.876	672.412	611.162	1.12581	0.187909	0.170967	0.726051						SLC25A10	IGSF5			GLI4	PPP3CB
sp|P28340|DPOD1_HUMAN	POLD1	DPOD1_HUMAN DNA polymerase delta catalytic subunit	2	32.3993	27.2015	26.5825	28.7278	34.4795	33.2374	29.3076	32.3415	1.12579	0.208879	0.17094	0.680106										ZKSCAN8
sp|Q3KR37|GRM1B_HUMAN	GRAMD1B	GRM1B_HUMAN GRAM domain-containing protein 1B	4	103.63	114.652	116.805	111.695	122.233	124.007	130.784	125.675	1.12516	0.0446747	0.170125	1.34994							P2RY2			NR4A3
sp|Q9BSH4|TACO1_HUMAN	TACO1	TACO1_HUMAN Translational activator of cytochrome c oxidase 1	5	145.45	177.88	161.623	161.651	186.552	177.54	181.46	181.851	1.12496	0.106199	0.169874	0.973879
sp|Q9Y4L1|HYOU1_HUMAN	HYOU1	HYOU1_HUMAN Hypoxia up-regulated protein 1	71	2664.62	3895.8	3184.5	3248.31	3740.71	3207.13	4013.52	3653.79	1.12483	0.397353	0.169705	0.400824							ROR2			PNKP
sp|P17568|NDUB7_HUMAN	NDUFB7	NDUB7_HUMAN NADH dehydrogenase [ubiquinone] 1 beta subcomplex subunit 7	2	89.3701	95.3891	100.174	94.9776	97.0447	115.89	107.459	106.798	1.12445	0.13307	0.169225	0.875919										TBX18
sp|O00499|BIN1_HUMAN	BIN1	BIN1_HUMAN Myc box-dependent-interacting protein 1	4	254.898	140.813	187.758	194.49	223.243	237.374	195.453	218.69	1.12443	0.530892	0.169192	0.274993		PTGS1		ZDHHC3		MIGA1	DRD4			DGCR8	GSTM3
sp|Q9Y6N1|COX11_HUMAN	COX11	COX11_HUMAN Cytochrome c oxidase assembly protein COX11, mitochondrial	1	91.0415	111.813	113.602	105.485	118.9	121.443	115.482	118.608	1.1244	0.152685	0.16916	0.816204						SMIM20	KCNMA1			GTPBP4	RNF220
sp|P78357|CNTP1_HUMAN	CNTNAP1	CNTP1_HUMAN Contactin-associated protein 1	11	388.144	499.575	502.972	463.564	538.022	492.172	532.705	520.967	1.12383	0.228451	0.168423	0.641206						SLC25A12	IGSF9			GLIS3	PPP6R1
sp|Q9BVG4|PBDC1_HUMAN	PBDC1	PBDC1_HUMAN Protein PBDC1	1	14.7093	16.5947	14.6625	15.3222	18.5629	14.7313	18.321	17.2051	1.12289	0.247793	0.16721	0.60591										UTP23
sp|Q9BVL2|NUPL1_HUMAN	NUPL1	NUPL1_HUMAN Nucleoporin p58/p45	4	112.501	92.0691	93.1287	99.2329	110.927	120.084	103.265	111.426	1.12287	0.212619	0.167189	0.672397										TSC22D4
sp|Q9Y2B0|CNPY2_HUMAN	CNPY2	CNPY2_HUMAN Protein canopy homolog 2	8	286.318	440.42	349.795	358.844	412.561	355.575	440.342	402.826	1.12257	0.438799	0.1668	0.357735						SLC25A1	IGSF21			GINS3	PPP2R5E
sp|Q8NBL1|PGLT1_HUMAN	POGLUT1	PGLT1_HUMAN Protein O-glucosyltransferase 1	6	218.226	323.605	261.939	267.923	298.334	281.75	321.619	300.568	1.12184	0.374383	0.165869	0.426684										ZKSCAN2
sp|Q9NZB2-6|F120A_HUMAN	FAM120A	F120A_HUMAN Isoform F of Constitutive coactivator of PPAR-gamma-like protein 1	1	75.3195	73.1362	70.946	73.1339	84.5935	80.6038	80.9294	82.0422	1.12181	0.00772435	0.165826	2.11214							OR4C16			MED23
sp|Q13423|NNTM_HUMAN	NNT	NNTM_HUMAN NAD(P) transhydrogenase, mitochondrial	105	5300.13	6479.39	6038.21	5939.24	6464	6276.87	7246.91	6662.59	1.12179	0.186739	0.165804	0.728766										TFAP2C
sp|Q9Y3C1|NOP16_HUMAN	NOP16	NOP16_HUMAN Nucleolar protein 16	1	56.2235	49.5835	64.606	56.8043	60.6836	60.8565	69.6135	63.7179	1.12171	0.258407	0.165698	0.587696										THEG
sp|Q9NWU5|RM22_HUMAN	MRPL22	RM22_HUMAN 39S ribosomal protein L22, mitochondrial	9	229.73	310.027	315.493	285.083	301.339	317.007	340.958	319.768	1.12167	0.312242	0.165643	0.505509							TRDV3			SMARCD3
sp|Q01433|AMPD2_HUMAN	AMPD2	AMPD2_HUMAN AMP deaminase 2	1	24.0459	19.4243	20.8544	21.4415	22.1769	30.8453	19.1054	24.0426	1.12131	0.528303	0.165182	0.277117		EOGT		GGTA1P	SLC38A7	COX15	CCR1	WASHC2C		BUD31	CBR1
sp|Q96E11|RRFM_HUMAN	MRRF	RRFM_HUMAN Ribosome-recycling factor, mitochondrial	13	511.969	634.816	641.78	596.188	589.918	744.331	670.585	668.278	1.12092	0.30524	0.16468	0.515358							XKR3			SP8
sp|O95208|EPN2_HUMAN	EPN2	EPN2_HUMAN Epsin-2	4	84.6532	116.58	102.965	101.399	116.097	112.806	111.978	113.627	1.12059	0.260387	0.164259	0.584381							OR2H1			MAF
sp|O95478|NSA2_HUMAN	NSA2	NSA2_HUMAN Ribosome biogenesis protein NSA2 homolog	2	48.6236	52.0679	65.2562	55.3159	66.4248	53.5154	65.9384	61.9595	1.1201	0.370958	0.163632	0.430675										TLE1
sp|P42224|STAT1_HUMAN	STAT1	STAT1_HUMAN Signal transducer and activator of transcription 1-alpha/beta	10	321.576	246.158	248.222	271.985	315.713	320.641	277.47	304.608	1.11994	0.313325	0.163425	0.504005
sp|Q9Y2G3|AT11B_HUMAN	ATP11B	AT11B_HUMAN Probable phospholipid-transporting ATPase IF	5	139.007	127.501	138.693	135.067	152.12	149.318	152.261	151.233	1.11969	0.0143578	0.1631	1.84291		LRIT3		SLC35B2		GFER	CLCNKB			CIZ1	EEF2KMT
sp|P82675|RT05_HUMAN	MRPS5	RT05_HUMAN 28S ribosomal protein S5, mitochondrial	10	537.757	717.273	761.153	672.061	719.608	704.298	833.538	752.481	1.11966	0.369358	0.163063	0.432552							VSTM5			SP4
sp|Q9NP79|VTA1_HUMAN	VTA1	VTA1_HUMAN Vacuolar protein sorting-associated protein VTA1 homolog	1	46.7616	38.1768	40.4972	41.8119	42.9778	51.2672	46.1843	46.8097	1.11953	0.228782	0.162897	0.640578
sp|Q8NI27|THOC2_HUMAN	THOC2	THOC2_HUMAN THO complex subunit 2	5	122.783	117.158	129.664	123.202	153.76	121.493	138.024	137.759	1.11816	0.218912	0.161122	0.659729
sp|Q8N8J7|CD032_HUMAN	C4orf32	CD032_HUMAN Uncharacterized protein C4orf32	1	12.3176	14.5524	15.5073	14.1258	17.2461	11.4185	18.6892	15.7846	1.11743	0.529918	0.160188	0.275791		SEZ6L				MRPS11	FCGR2A			DUXA	JMJD4
sp|Q9NR12|PDLI7_HUMAN	PDLIM7	PDLI7_HUMAN PDZ and LIM domain protein 7	8	496.795	384.064	388.254	423.038	495.352	469.843	452.464	472.553	1.11705	0.27247	0.159689	0.564681										XRCC1
sp|O94966-5|UBP19_HUMAN	USP19	UBP19_HUMAN Isoform 5 of Ubiquitin carboxyl-terminal hydrolase 19	1	11.1451	14.7395	12.112	12.6655	14.1101	14.7765	13.5127	14.1331	1.11587	0.265359	0.158172	0.576166
sp|Q9BW91|NUDT9_HUMAN	NUDT9	NUDT9_HUMAN ADP-ribose pyrophosphatase, mitochondrial	3	125.314	153.799	135.139	138.084	148.847	151.517	161.713	154.026	1.11545	0.15912	0.157631	0.798276										TOX
sp|Q13045|FLII_HUMAN	FLII	FLII_HUMAN Protein flightless-1 homolog	1	28.5952	25.9536	26.741	27.0966	28.8578	32.0726	29.7284	30.2196	1.11526	0.0652876	0.157374	1.18517							OR52B2			MSC
sp|Q92552|RT27_HUMAN	MRPS27	RT27_HUMAN 28S ribosomal protein S27, mitochondrial	12	559.395	714.127	757.836	677.12	765.477	748.603	751.062	755.047	1.11509	0.266711	0.157156	0.573959							VN1R2			SOX5
sp|Q13563|PKD2_HUMAN	PKD2	PKD2_HUMAN Polycystin-2	1	18.0494	27.6001	24.14	23.2632	26.7547	24.525	26.5391	25.9396	1.11505	0.405418	0.157107	0.392097										ZC3H7A
sp|Q8NC56|LEMD2_HUMAN	LEMD2	LEMD2_HUMAN LEM domain-containing protein 2	3	128.492	157.664	146.004	144.053	152.725	159.659	169.352	160.579	1.11472	0.165429	0.156675	0.781389							SLCO4C1			RBM12
sp|O15213|WDR46_HUMAN	WDR46	WDR46_HUMAN WD repeat-containing protein 46	2	73.5691	77.4945	81.7705	77.6114	100.894	72.8048	85.7539	86.4842	1.11432	0.353222	0.156168	0.451952
sp|O95716|RAB3D_HUMAN	RAB3D	RAB3D_HUMAN Ras-related protein Rab-3D	7	268.797	297.424	271.828	279.35	306.177	309.86	317.806	311.281	1.11431	0.0302202	0.156147	1.5197										ZNF488
sp|Q9BYN8|RT26_HUMAN	MRPS26	RT26_HUMAN 28S ribosomal protein S26, mitochondrial	9	356.659	424.334	459.283	413.425	430.348	434.768	516.803	460.64	1.1142	0.315722	0.156012	0.500695							VN1R17P			SOX4
sp|Q9UHQ4-2|BAP29_HUMAN	BCAP29	BAP29_HUMAN Isoform 2 of B-cell receptor-associated protein 29	2	58.9969	67.2501	78.1901	68.1457	79.9823	73.6708	74.0473	75.9001	1.11379	0.260574	0.15548	0.584069		PLOD2		UXS1		MCEE	CYTH4			DDX31	GNPDA1
sp|P08240|SRPR_HUMAN	SRPR	SRPR_HUMAN Signal recognition particle receptor subunit alpha	21	910.952	1140.81	1093.55	1048.44	1179.77	1080.93	1242.2	1167.63	1.11369	0.230535	0.155344	0.637262
sp|P35613|BASI_HUMAN	BSG	BASI_HUMAN Basigin	22	1199.07	1683.38	1399.13	1427.19	1635.01	1552.09	1580.66	1589.25	1.11355	0.319226	0.155169	0.495902		RNF139				MRPL16	EFNB2			DMRTA2	HERC4
sp|Q9NVV4|PAPD1_HUMAN	MTPAP	PAPD1_HUMAN Poly(A) RNA polymerase, mitochondrial	2	45.9235	52.0239	50.3115	49.4196	55.8236	53.0069	56.1515	54.994	1.1128	0.0546925	0.15419	1.26207										SRSF8
sp|Q16891-4|IMMT_HUMAN	IMMT	IMMT_HUMAN Isoform 4 of Mitochondrial inner membrane protein	56	3233.74	3824.77	3445.56	3501.36	3519.69	3981.51	4187.03	3896.08	1.11273	0.206876	0.154108	0.68429							SEMA4F			POLR2L
sp|Q4G176|ACSF3_HUMAN	ACSF3	ACSF3_HUMAN Acyl-CoA synthetase family member 3, mitochondrial	14	621.256	779.963	687.231	696.15	767.403	745.915	810.007	774.442	1.11246	0.190563	0.153758	0.719962		CRELD2		CHST4	DNASE2	ASB9	ANO4	RAB4A		ARX	APEH	TOLLIP	SEH1L
sp|Q96N66|MBOA7_HUMAN	MBOAT7	MBOA7_HUMAN Lysophospholipid acyltransferase 7	10	381.95	484.288	438.877	435.038	477.994	489.546	483.528	483.689	1.11183	0.177804	0.152938	0.750058							TRAV17			RSL24D1
sp|P28070|PSB4_HUMAN	PSMB4	PSB4_HUMAN Proteasome subunit beta type-4	4	210.747	149.129	172.702	177.526	178.706	213.393	200.01	197.37	1.11178	0.389889	0.152869	0.409059										ZNF283
sp|Q9NRW7|VPS45_HUMAN	VPS45	VPS45_HUMAN Vacuolar protein sorting-associated protein 45	7	301.278	299.325	311.294	303.966	332.604	342.886	338.171	337.887	1.1116	0.00203571	0.152633	2.69128
sp|Q53GQ0|DHB12_HUMAN	HSD17B12	DHB12_HUMAN Estradiol 17-beta-dehydrogenase 12	8	273.448	323.343	309.63	302.14	306.166	348.55	352.282	335.666	1.11096	0.185303	0.151808	0.732117							PTPRC			PIAS1
sp|Q13620|CUL4B_HUMAN	CUL4B	CUL4B_HUMAN Cullin-4B	13	639.767	554.359	555.035	583.054	660.967	646.236	635.333	647.512	1.11055	0.0927657	0.151279	1.03261						TXNRD2	LRRC52			HIST2H2AB	SRXN1
sp|O43181|NDUS4_HUMAN	NDUFS4	NDUS4_HUMAN NADH dehydrogenase [ubiquinone] iron-sulfur protein 4, mitochondrial	7	261.694	353.363	311.633	308.896	333.752	320.665	374.563	342.993	1.11038	0.334133	0.151058	0.476081										TBX6
sp|A0MZ66-3|SHOT1_HUMAN	KIAA1598	SHOT1_HUMAN Isoform 3 of Shootin-1	3	87.1903	60.376	59.088	68.8848	75.0339	83.7029	70.6835	76.4734	1.11017	0.487226	0.150774	0.312269							SLC34A1			PRPF8
sp|O43237|DC1L2_HUMAN	DYNC1LI2	DC1L2_HUMAN Cytoplasmic dynein 1 light intermediate chain 2	4	182.91	150.618	148.666	160.732	190.214	159.331	185.722	178.423	1.11007	0.295155	0.150644	0.52995							OR10J5			KDM3B
sp|O95373|IPO7_HUMAN	IPO7	IPO7_HUMAN Importin-7	17	894.314	777.55	710.908	794.258	892.294	893.767	857.797	881.286	1.10957	0.187925	0.150003	0.726015							SIPA1L3			POP4
sp|Q9UKU7|ACAD8_HUMAN	ACAD8	ACAD8_HUMAN Isobutyryl-CoA dehydrogenase, mitochondrial	2	57.1666	87.3142	79.7803	74.7537	81.4319	79.6901	87.6712	82.9311	1.10939	0.432386	0.149768	0.364128		BFAR	UGGT1	B4GALT1	C17orf59	AGK	ADORA2B	MARCH3	PEX10	ANKRD1	AK5	LGALS3	LAMTOR5
sp|Q9NVX2|NLE1_HUMAN	NLE1	NLE1_HUMAN Notchless protein homolog 1	1	43.4506	48.8875	51.678	48.0054	60.3696	47.5285	51.8718	53.2567	1.10939	0.306027	0.149766	0.51424										TERF2
sp|Q8IUH4|ZDH13_HUMAN	ZDHHC13	ZDH13_HUMAN Palmitoyltransferase ZDHHC13	2	55.1292	56.7997	49.2494	53.7261	58.8042	62.3775	57.5598	59.5805	1.10897	0.0965935	0.149217	1.01505
sp|Q9UMY1|NOL7_HUMAN	NOL7	NOL7_HUMAN Nucleolar protein 7	5	145.764	143.56	157.055	148.793	170.344	151.907	172.681	164.977	1.10877	0.106218	0.148958	0.973802										TGIF1
sp|Q96B49|TOM6_HUMAN	TOMM6	TOM6_HUMAN Mitochondrial import receptor subunit TOM6 homolog	2	79.1118	77.8766	79.3192	78.7692	70.2766	113.857	77.8623	87.3319	1.10871	0.558962	0.148877	0.252618
sp|P09496-2|CLCA_HUMAN	CLTA	CLCA_HUMAN Isoform Non-brain of Clathrin light chain A	11	596.027	575.432	602.094	591.184	609.652	692.362	663.21	655.075	1.10807	0.0665769	0.148052	1.17668						SCO2	HTR1F			GATA1	PMP2
sp|Q49MG5|MAP9_HUMAN	MAP9	MAP9_HUMAN Microtubule-associated protein 9	1	121.266	152.269	153.765	142.433	163.387	150.126	159.778	157.764	1.10763	0.246676	0.147478	0.607874							TRABD2B			RPS19
sp|Q9NP81|SYSM_HUMAN	SARS2	SYSM_HUMAN Serine--tRNA ligase, mitochondrial	10	777.47	837.155	893.983	836.203	887.218	944.391	946.943	926.184	1.10761	0.0816406	0.147446	1.08809										ZNF835
sp|Q96JJ3|ELMO2_HUMAN	ELMO2	ELMO2_HUMAN Engulfment and cell motility protein 2	2	45.7418	42.6631	37.9004	42.1018	44.8486	52.1513	42.8386	46.6128	1.10715	0.282332	0.146847	0.54924							OR1S2			LIN54
sp|P38432|COIL_HUMAN	COIL	COIL_HUMAN Coilin	2	71.0231	70.5219	80.2694	73.9381	91.128	74.3809	80.0058	81.8382	1.10685	0.248399	0.146457	0.60485						SLC25A2	IL31RA			GNL3	PRMT9
tr|K7ELL7|K7ELL7_HUMAN	PRKCSH	K7ELL7_HUMAN Glucosidase 2 subunit beta	1	85.8758	140.349	106.44	110.888	153.553	89.6189	124.979	122.717	1.10667	0.65285	0.146231	0.185186										ZNF229
sp|Q9UHB6-4|LIMA1_HUMAN	LIMA1	LIMA1_HUMAN Isoform 4 of LIM domain and actin-binding protein 1	2	45.707	49.8247	51.1049	48.8789	56.936	53.0886	52.2475	54.0907	1.10663	0.074742	0.14617	1.12644							SSTR1			RBM7
sp|Q6L8Q7|PDE12_HUMAN	PDE12	PDE12_HUMAN 2',5'-phosphodiesterase 12	4	179.646	193.934	196.844	190.141	208.271	202.257	220.613	210.38	1.10644	0.0557761	0.145927	1.25355										WDR43
sp|Q9H0R6|GATA_HUMAN	QRSL1	GATA_HUMAN Glutamyl-tRNA(Gln) amidotransferase subunit A, mitochondrial	4	95.5365	128.71	110.521	111.589	116.23	125.779	128.242	123.417	1.10599	0.313495	0.145339	0.50377										ZNF441
sp|Q96SB8-2|SMC6_HUMAN	SMC6	SMC6_HUMAN Isoform 2 of Structural maintenance of chromosomes protein 6	2	104.345	141.642	199.596	148.528	170.971	183.875	137.729	164.191	1.10546	0.639227	0.144648	0.194345
sp|O75844|FACE1_HUMAN	ZMPSTE24	FACE1_HUMAN CAAX prenyl protease 1 homolog	10	523.365	575.394	642.016	580.258	603.595	607.211	712.122	640.976	1.10464	0.286838	0.143575	0.542363
sp|Q15276|RABE1_HUMAN	RABEP1	RABE1_HUMAN Rab GTPase-binding effector protein 1	1	13.5168	11.1116	9.66537	11.4313	12.5477	13.5212	11.8102	12.6264	1.10455	0.385424	0.14346	0.414062										ZNF510
sp|Q8NCN5|PDPR_HUMAN	PDPR	PDPR_HUMAN Pyruvate dehydrogenase phosphatase regulatory subunit, mitochondrial	18	746.999	929.746	940.793	872.512	947.335	923.269	1020.56	963.721	1.10454	0.258564	0.14344	0.587431										XRCC5
sp|Q6KC79|NIPBL_HUMAN	NIPBL	NIPBL_HUMAN Nipped-B-like protein	4	175.035	188.145	189.137	184.105	240.665	180.325	188.639	203.21	1.10377	0.380944	0.142435	0.419139										TEF
sp|Q9H1B7|I2BPL_HUMAN	IRF2BPL	I2BPL_HUMAN Interferon regulatory factor 2-binding protein-like	4	105.199	80.8547	79.4023	88.4853	98.5474	104.86	89.5735	97.6602	1.10369	0.387489	0.142333	0.411741							SLC12A6			POU2F3
sp|O95721|SNP29_HUMAN	SNAP29	SNP29_HUMAN Synaptosomal-associated protein 29	10	453.081	399.263	378.168	410.171	473.59	452.621	431.746	452.652	1.10357	0.169266	0.142178	0.77143
sp|P40855|PEX19_HUMAN	PEX19	PEX19_HUMAN Peroxisomal biogenesis factor 19	5	238.442	189.162	216.756	214.787	229.438	262.253	219.315	237.002	1.10343	0.313154	0.141994	0.504243										YY1
sp|Q8N3U4-2|STAG2_HUMAN	STAG2	STAG2_HUMAN Isoform 2 of Cohesin subunit SA-2	7	210.966	198.479	209.709	206.385	231.775	220.636	230.424	227.612	1.10285	0.0160477	0.141238	1.79459
sp|P33176|KINH_HUMAN	KIF5B	KINH_HUMAN Kinesin-1 heavy chain	8	345.908	292.707	280.424	306.346	342.474	356.429	314.349	337.751	1.10251	0.254092	0.140796	0.595009							SLC39A5			PSMG2
sp|Q07817|B2CL1_HUMAN	BCL2L1	B2CL1_HUMAN Bcl-2-like protein 1	1	24.7008	24.4183	23.5245	24.2145	25.9301	26.8652	27.255	26.6834	1.10196	0.0095622	0.140071	2.01944		POMT2		YIPF1		MGME1	DLGAP3			DDX56	GSPT2
sp|Q6UVK1|CSPG4_HUMAN	CSPG4	CSPG4_HUMAN Chondroitin sulfate proteoglycan 4	12	255.271	323.264	301.685	293.407	329.583	320.066	320.113	323.254	1.10173	0.215568	0.139766	0.666416						TMEM14C	LGR4			HEMGN	SIK2
sp|Q9BQA9|CQ062_HUMAN	C17orf62	CQ062_HUMAN Uncharacterized protein C17orf62	1	38.2116	41.0168	42.8702	40.6996	46.1817	44.9244	43.3977	44.8346	1.1016	0.0584999	0.139599	1.23284		SEC22C				MRPL42	ERVK13-1			DSN1	IARS1
sp|Q9H4M9|EHD1_HUMAN	EHD1	EHD1_HUMAN EH domain-containing protein 1	7	246.754	219.681	257.778	241.404	273.46	290.294	233.991	265.915	1.10153	0.290939	0.139515	0.536198							OR13F1			KLHL15
sp|Q3T906|GNPTA_HUMAN	GNPTAB	GNPTA_HUMAN N-acetylglucosamine-1-phosphotransferase subunits alpha/beta	3	105.54	95.1431	110.465	103.716	119.174	112.334	111.095	114.201	1.10109	0.112354	0.138935	0.949412							OR8D4			NMES1
sp|Q9H6R4|NOL6_HUMAN	NOL6	NOL6_HUMAN Nucleolar protein 6	1	9.0623	12.2192	15.0751	12.1189	13.6739	13.0583	13.2911	13.3411	1.10085	0.522424	0.138624	0.281977										TFPT
sp|Q9Y2X7-3|GIT1_HUMAN	GIT1	GIT1_HUMAN Isoform 3 of ARF GTPase-activating protein GIT1	3	91.2034	78.6975	73.8524	81.2511	80.6568	108.997	78.5262	89.3932	1.10021	0.503848	0.137778	0.297701							OR6C76			NFIL3
sp|Q8NFH4|NUP37_HUMAN	NUP37	NUP37_HUMAN Nucleoporin Nup37	2	47.4037	51.7805	47.5346	48.9063	53.922	54.3829	52.9896	53.7649	1.09935	0.0313724	0.136645	1.50345										TRIM33
sp|P36404|ARL2_HUMAN	ARL2	ARL2_HUMAN ADP-ribosylation factor-like protein 2	2	57.9742	76.5682	64.6447	66.3957	76.4359	75.0795	67.4365	72.984	1.09923	0.342124	0.13649	0.465816		HSD17B12		NAGPA		ECI1	CDHR1			CEBPE	DDTL
sp|Q9UKV5|AMFR_HUMAN	AMFR	AMFR_HUMAN E3 ubiquitin-protein ligase AMFR	1	9.78348	11.7678	15.5646	12.372	11.7788	14.6516	14.3645	13.5983	1.09912	0.558994	0.13635	0.252593		ELOVL6		GGA2	SLC30A2	COX11	CCKAR	WASHC1		BUB3	CASTOR1
sp|Q9UKB3|DJC12_HUMAN	DNAJC12	DJC12_HUMAN DnaJ homolog subfamily C member 12	2	87.8983	72.2119	61.8369	73.9824	95.4697	71.5656	76.8963	81.3105	1.09905	0.522995	0.136261	0.281503							NRN1L			INTS12
sp|Q9H2U2|IPYR2_HUMAN	PPA2	IPYR2_HUMAN Inorganic pyrophosphatase 2, mitochondrial	22	1437.59	1793.47	1882.33	1704.46	1711.74	1895.19	2011.96	1872.96	1.09886	0.355819	0.136005	0.448771										ZNF100
sp|Q14738|2A5D_HUMAN	PPP2R5D	2A5D_HUMAN Serine/threonine-protein phosphatase 2A 56 kDa regulatory subunit delta isoform	3	89.511	77.4668	68.4449	78.4742	81.083	96.5137	81.0457	86.2142	1.09863	0.387266	0.135706	0.411991										ZNF169
sp|Q9NP80|PLPL8_HUMAN	PNPLA8	PLPL8_HUMAN Calcium-independent phospholipase A2-gamma	1	23.9213	30.9442	30.8428	28.5694	31.6322	29.5457	32.9459	31.3746	1.09819	0.329081	0.135126	0.482697										ZIC5
sp|Q9UBV2|SE1L1_HUMAN	SEL1L	SE1L1_HUMAN Protein sel-1 homolog 1	19	769.92	934.854	894.829	866.534	972.889	910.897	970.963	951.583	1.09815	0.188265	0.135073	0.72523										ZSCAN5C
sp|Q8NBJ4|GOLM1_HUMAN	GOLM1	GOLM1_HUMAN Golgi membrane protein 1	11	707.703	709.521	681.219	699.481	780.468	729.913	793.311	767.897	1.09781	0.0330092	0.134629	1.48137							OR8K1			NOL6
sp|O15126|SCAM1_HUMAN	SCAMP1	SCAM1_HUMAN Secretory carrier-associated membrane protein 1	14	788.915	648.394	683.527	706.945	794.939	774.946	757.758	775.881	1.09751	0.188742	0.134237	0.724132										ZNF841
sp|Q641Q2|FA21A_HUMAN	FAM21A	FA21A_HUMAN WASH complex subunit FAM21A	7	336.475	258.748	267.175	287.466	318.27	338.656	289.513	315.479	1.09745	0.380592	0.134154	0.41954							OR4F21			MEIS3
sp|Q96D53|ADCK4_HUMAN	ADCK4	ADCK4_HUMAN Uncharacterized aarF domain-containing protein kinase 4	4	62.4419	73.6096	76.9952	71.0156	78.2015	81.8881	73.5907	77.8934	1.09685	0.241685	0.133366	0.616749		CYP2C8		COPB2	GUSB	ATP5MPL	ART3	RPS6KC1		ATAD5	ARHGEF3
sp|Q6FI81|CPIN1_HUMAN	CIAPIN1	CPIN1_HUMAN Anamorsin	2	65.5365	77.8871	91.6913	78.3716	83.1308	91.6418	83.0405	85.9377	1.09654	0.401798	0.13296	0.395992						POLRMT	GRM4			FOXI2	PDE1B
sp|P30085|KCY_HUMAN	CMPK1	KCY_HUMAN UMP-CMP kinase	2	98.5285	86.1609	86.8247	90.5047	93.6611	103.664	100.39	99.2383	1.0965	0.154352	0.132905	0.811489						SDHC	HVCN1			GATAD2A	PPIAL4E
sp|Q969E2|SCAM4_HUMAN	SCAMP4	SCAM4_HUMAN Secretory carrier-associated membrane protein 4	4	131.781	125.919	126.347	128.016	142.095	137.094	141.892	140.36	1.09643	0.00778433	0.132816	2.10878										ZNF846
sp|Q96S55|WRIP1_HUMAN	WRNIP1	WRIP1_HUMAN ATPase WRNIP1	1	49.6815	36.7194	40.3688	42.2566	44.6905	49.1655	45.122	46.326	1.0963	0.378562	0.132645	0.421863
sp|P51398|RT29_HUMAN	DAP3	RT29_HUMAN 28S ribosomal protein S29, mitochondrial	18	738.794	888.954	926.297	851.348	879.315	936.553	983.555	933.141	1.09607	0.275088	0.132346	0.560528							MAGI1			HMX1	TBC1D10B
sp|Q70J99-3|UN13D_HUMAN	UNC13D	UN13D_HUMAN Isoform 3 of Protein unc-13 homolog D	2	50.714	42.9628	42.9298	45.5355	50.3091	50.4433	48.7762	49.8429	1.09459	0.17861	0.130395	0.748094
sp|Q9H7F0|AT133_HUMAN	ATP13A3	AT133_HUMAN Probable cation-transporting ATPase 13A3	2	55.8482	59.9823	59.9381	58.5895	72.2287	59.4614	60.6816	64.1239	1.09446	0.266787	0.130219	0.573835		MBOAT4		SLC35D2		GLDC	CLDN12			CLK4	EIF2D
sp|Q9NSE4|SYIM_HUMAN	IARS2	SYIM_HUMAN Isoleucine--tRNA ligase, mitochondrial	45	2576.1	3375.6	3138.11	3029.94	3419.06	3041.04	3487.66	3315.92	1.09439	0.35667	0.130122	0.447734							RRAD			PNMA3
sp|Q8NC96|NECP1_HUMAN	NECAP1	NECP1_HUMAN Adaptin ear-binding coat-associated protein 1	1	14.0538	9.88606	11.7755	11.9051	13.3996	13.8522	11.8252	13.0256	1.09412	0.453945	0.129772	0.342997										TCEAL4
sp|Q15046-2|SYK_HUMAN	KARS	SYK_HUMAN Isoform Mitochondrial of Lysine--tRNA ligase	12	955.953	873.675	943.745	924.458	1002.7	1013.85	1014.06	1010.2	1.09275	0.0296629	0.127969	1.52779							SLC22A9			PRDM8
sp|Q969S9|RRF2M_HUMAN	GFM2	RRF2M_HUMAN Ribosome-releasing factor 2, mitochondrial	8	376.394	463.533	441.288	427.072	439.517	471.317	487.173	466.002	1.09116	0.259552	0.125859	0.585776							OR6A2			NEMP2
sp|Q5HYK3|COQ5_HUMAN	COQ5	COQ5_HUMAN 2-methoxy-6-polyprenyl-1,4-benzoquinol methylase, mitochondrial	2	38.141	46.2379	44.0989	42.8259	46.2283	45.5992	48.3416	46.723	1.091	0.202669	0.125649	0.693212						SLC25A52	KCNJ16			GTF3C2	RNASEH1
sp|Q9NVI7-2|ATD3A_HUMAN	ATAD3A	ATD3A_HUMAN Isoform 2 of ATPase family AAA domain-containing protein 3A	13	557	672.629	644.132	624.587	618.141	680.578	744.392	681.037	1.09038	0.325223	0.12483	0.487819		LMF1		SLC30A5		GATC	CHRNB3			CHTF8	DVL1P1
sp|P49419-2|AL7A1_HUMAN	ALDH7A1	AL7A1_HUMAN Isoform 2 of Alpha-aminoadipic semialdehyde dehydrogenase	24	1287.74	1744.23	1553.82	1528.6	1735.11	1455.37	1809.6	1666.69	1.09034	0.46398	0.124781	0.333501		DPM1		GALNTL6	RRAGB	COA7	CADM2	VPS37C		BRD4	CAPN3
sp|Q96ET8|TV23C_HUMAN	TVP23C	TV23C_HUMAN Golgi apparatus membrane protein TVP23 homolog C	2	110.46	107.238	131.732	116.477	117.384	128.497	135.109	126.997	1.09032	0.31948	0.124751	0.495556
sp|P15151|PVR_HUMAN	PVR	PVR_HUMAN Poliovirus receptor	4	345.417	346.756	353.402	348.525	434.085	345.532	360.062	379.893	1.09	0.318129	0.12433	0.497397										ZNF416
sp|Q9BWS9-2|CHID1_HUMAN	CHID1	CHID1_HUMAN Isoform 2 of Chitinase domain-containing protein 1	2	126.68	189.326	162.202	159.402	173.159	179.981	167.938	173.693	1.08965	0.482296	0.123865	0.316686						PDP1	GPRIN1			FOXB1	PADI2
sp|Q16531|DDB1_HUMAN	DDB1	DDB1_HUMAN DNA damage-binding protein 1	17	938.584	890.625	906.605	911.938	1074.61	945.73	960.086	993.475	1.08941	0.131787	0.123547	0.880126							MFAP3			HNRNPM	TPI1
sp|Q8N6G5|CGAT2_HUMAN	CSGALNACT2	CGAT2_HUMAN Chondroitin sulfate N-acetylgalactosaminyltransferase 2	1	12.5028	12.4628	12.5619	12.5091	14.071	13.602	13.1994	13.6241	1.08913	0.0117066	0.123179	1.93157						TK2	LAT2			HELLS	SH2D4A
sp|P28331-2|NDUS1_HUMAN	NDUFS1	NDUS1_HUMAN Isoform 2 of NADH-ubiquinone oxidoreductase 75 kDa subunit, mitochondrial	33	1261.62	1597.89	1558.35	1472.62	1511.76	1600.53	1698.51	1603.6	1.08894	0.332949	0.122928	0.477623										TBX22
sp|Q8NBJ7|SUMF2_HUMAN	SUMF2	SUMF2_HUMAN Sulfatase-modifying factor 2	9	282.108	380.523	333.383	332.005	368.923	336.35	378.948	361.407	1.08856	0.399255	0.122419	0.398749
sp|Q96Q11|TRNT1_HUMAN	TRNT1	TRNT1_HUMAN CCA tRNA nucleotidyltransferase 1, mitochondrial	6	265.759	310.72	295.087	290.522	311.104	331.832	305.704	316.213	1.08843	0.170539	0.122251	0.768177
sp|O43815|STRN_HUMAN	STRN	STRN_HUMAN Striatin	5	198.229	217.207	212.846	209.428	235.969	226.628	221.03	227.876	1.08809	0.0626317	0.121795	1.20321
sp|Q16134|ETFD_HUMAN	ETFDH	ETFD_HUMAN Electron transfer flavoprotein-ubiquinone oxidoreductase, mitochondrial	18	1026.07	1205.92	1096.26	1109.42	1145.76	1175.21	1298.7	1206.56	1.08756	0.238856	0.121093	0.621863							OR2T33			MBD6
sp|Q14126|DSG2_HUMAN	DSG2	DSG2_HUMAN Desmoglein-2	32	1144.41	1508.02	1267.44	1306.62	1483.64	1375.56	1403.34	1420.85	1.08742	0.363875	0.120907	0.439048							OR10G8			KAT6A
sp|Q8IYI6|EXOC8_HUMAN	EXOC8	EXOC8_HUMAN Exocyst complex component 8	3	68.7549	65.8883	59.4897	64.7109	70.1026	73.7561	67.22	70.3596	1.08729	0.164892	0.120737	0.782801							OR2V1			MCM7
sp|P56199|ITA1_HUMAN	ITGA1	ITA1_HUMAN Integrin alpha-1	24	1123.66	1405.82	1206.48	1245.32	1454.59	1274.55	1330.37	1353.17	1.08661	0.338091	0.119835	0.470967							SLC16A2			PPARGC1B
sp|A8MXV4|NUD19_HUMAN	NUDT19	NUD19_HUMAN Nucleoside diphosphate-linked moiety X motif 19, mitochondrial	5	78.3188	95.6984	96.6175	90.2116	94.4196	89.7738	109.836	98.0099	1.08644	0.410654	0.119615	0.386524										TOP1
sp|Q9UI09|NDUAC_HUMAN	NDUFA12	NDUAC_HUMAN NADH dehydrogenase [ubiquinone] 1 alpha subcomplex subunit 12	9	364.325	435.473	453.049	417.616	435.254	447.572	478.234	453.687	1.08637	0.2953	0.11952	0.529736										TAF5
sp|Q15050|RRS1_HUMAN	RRS1	RRS1_HUMAN Ribosome biogenesis regulatory protein homolog	10	470.086	467.758	565.177	501.007	570.7	480.561	581.266	544.176	1.08616	0.39446	0.119241	0.403997										ZNF780B
sp|O00541|PESC_HUMAN	PES1	PESC_HUMAN Pescadillo homolog	8	309.533	326.293	355.311	330.379	379.367	366.056	330.329	358.584	1.08537	0.227971	0.118189	0.642121										YJU2
sp|P54289-4|CA2D1_HUMAN	CACNA2D1	CA2D1_HUMAN Isoform 4 of Voltage-dependent calcium channel subunit alpha-2/delta-1	2	58.6248	65.1856	63.8124	62.5409	72.6868	62.876	67.9513	67.838	1.0847	0.201195	0.117294	0.696383		SLC37A4				MRPS25	FPR1			EAF2	KRT20
sp|Q9BYD3|RM04_HUMAN	MRPL4	RM04_HUMAN 39S ribosomal protein L4, mitochondrial	14	780.001	972.216	1052.13	934.782	905.885	1070.94	1064.7	1013.84	1.08457	0.46144	0.11713	0.335885							TRPA1			SNAPC4
sp|P27797|CALR_HUMAN	CALR	CALR_HUMAN Calreticulin	62	3389.15	5349.44	4085.96	4274.85	4711.34	4283.8	4912.92	4636.02	1.08449	0.581447	0.117012	0.23549		SPCS3				MRPS35	FXYD1			EED	LAP3
sp|P48651|PTSS1_HUMAN	PTDSS1	PTSS1_HUMAN Phosphatidylserine synthase 1	2	103.497	118.34	121.629	114.489	115.111	129.35	127.974	124.145	1.08434	0.250289	0.116821	0.601559										ZNF33B
sp|Q9Y3B7|RM11_HUMAN	MRPL11	RM11_HUMAN 39S ribosomal protein L11, mitochondrial	6	181.969	222.599	232.501	212.356	233.065	206.927	250.682	230.225	1.08414	0.422433	0.116555	0.374242							TRBV7-4			SMAD6
sp|P51572-2|BAP31_HUMAN	BCAP31	BAP31_HUMAN Isoform 2 of B-cell receptor-associated protein 31	36	2557.24	2946.36	3079.84	2861.15	3107.18	3187.68	3009.4	3101.42	1.08398	0.219098	0.116334	0.659362		PNLDC1		VPS41		MCU	DAGLA			DDX41	GNPDA2
sp|P00519-2|ABL1_HUMAN	ABL1	ABL1_HUMAN Isoform IB of Tyrosine-protein kinase ABL1	2	46.0804	39.836	38.8766	41.5977	48.6085	43.2848	43.3757	45.0897	1.08395	0.28957	0.116294	0.538247		ATP8B3	TMED5	B3GNT8	ATP6V1G2	ACSM6	ADGRL4	FYCO1	MPV17L	ALX1	AGBL1	GABARAP	ITFG2
sp|Q9NQX5|NPDC1_HUMAN	NPDC1	NPDC1_HUMAN Neural proliferation differentiation and control protein 1	1	18.9174	28.6966	23.9015	23.8385	24.3461	25.2379	27.9264	25.8368	1.08383	0.544501	0.116136	0.264001										TIGD1
sp|Q5UIP0|RIF1_HUMAN	RIF1	RIF1_HUMAN Telomere-associated protein RIF1	8	195.197	215.408	233.091	214.565	245.141	225.009	227.232	232.461	1.0834	0.23059	0.11557	0.637159										ZNF611
sp|Q9Y4W6|AFG32_HUMAN	AFG3L2	AFG32_HUMAN AFG3-like protein 2	29	1425.54	1729.37	1743.7	1632.87	1721.06	1696.25	1889.75	1769.02	1.08338	0.320791	0.115542	0.493778		CYP3A5		DENND5A	KXD1	BCKDHA	ATP1B3	SLC26A7		ATRX	ASRGL1
sp|O00400|ACATN_HUMAN	SLC33A1	ACATN_HUMAN Acetyl-coenzyme A transporter 1	4	151.937	196.284	171.903	173.375	181.501	188.43	193.478	187.803	1.08322	0.338514	0.115326	0.470423
sp|P21291|CSRP1_HUMAN	CSRP1	CSRP1_HUMAN Cysteine and glycine-rich protein 1	5	206.898	173.773	148.736	176.469	203.144	197.494	172.8	191.146	1.08317	0.488257	0.11526	0.311351						TMEM177	LGR6			HES1	SIK3
sp|Q9UGM6|SYWM_HUMAN	WARS2	SYWM_HUMAN Tryptophan--tRNA ligase, mitochondrial	1	20.448	20.7243	21.2719	20.8147	20.8026	25.013	21.8143	22.5433	1.08305	0.251864	0.115095	0.598834
sp|P33527|MRP1_HUMAN	ABCC1	MRP1_HUMAN Multidrug resistance-associated protein 1	30	1051.34	1370.66	1201.33	1207.78	1353.2	1241.24	1328.76	1307.73	1.08276	0.366706	0.114716	0.435681		ALG6	NAT8	B3GALNT1	ATP6V0B	ACADVL	ADCY6	CHMP6	EHHADH	AEBP2	ACOT6	ATG7	ATP6V1E1	SNF8
sp|Q7L592|NDUF7_HUMAN	NDUFAF7	NDUF7_HUMAN NADH dehydrogenase [ubiquinone] complex I, assembly factor 7	8	512.893	460.482	602.441	525.272	557.913	564.275	583.724	568.637	1.08256	0.361857	0.114445	0.441463										TBL1Y
sp|P82933|RT09_HUMAN	MRPS9	RT09_HUMAN 28S ribosomal protein S9, mitochondrial	11	464.683	578.857	589.262	544.267	583.709	565.413	618.144	589.089	1.08235	0.354047	0.11417	0.450939							XG			SP7
sp|O43290|SNUT1_HUMAN	SART1	SNUT1_HUMAN U4/U6.U5 tri-snRNP-associated protein 1	3	52.7645	47.4253	47.627	49.2723	57.7455	52.7596	49.4845	53.3299	1.08235	0.24364	0.114168	0.613252										ZNF836
sp|Q96T83|SL9A7_HUMAN	SLC9A7	SL9A7_HUMAN Sodium/hydrogen exchanger 7	1	22.7417	23.1435	19.4435	21.7762	22.7873	24.9017	23.0045	23.5645	1.08212	0.256146	0.113863	0.591513
sp|Q9Y2W6|TDRKH_HUMAN	TDRKH	TDRKH_HUMAN Tudor and KH domain-containing protein	1	16.6056	15.0671	17.426	16.3662	17.7097	14.4365	20.9787	17.7083	1.082	0.5411	0.113702	0.266722
sp|Q14249|NUCG_HUMAN	ENDOG	NUCG_HUMAN Endonuclease G, mitochondrial	2	118.304	149.396	161.907	143.202	140.136	163.236	161.441	154.938	1.08195	0.475962	0.113631	0.322427							OR2B11			LSM3
sp|Q15738|NSDHL_HUMAN	NSDHL	NSDHL_HUMAN Sterol-4-alpha-carboxylate 3-dehydrogenase, decarboxylating	19	1198.08	1234.35	1371.63	1268.02	1338.72	1424.83	1351.76	1371.77	1.08182	0.154863	0.113461	0.810053										TLE2
sp|O60343|TBCD4_HUMAN	TBC1D4	TBCD4_HUMAN TBC1 domain family member 4	1	21.3908	16.7719	15.9741	18.0456	19.5133	23.3527	15.695	19.5204	1.08172	0.624051	0.113333	0.20478
sp|Q9BYD1|RM13_HUMAN	MRPL13	RM13_HUMAN 39S ribosomal protein L13, mitochondrial	9	414.487	513.413	538.369	488.757	495.017	538.549	551.786	528.451	1.08121	0.393325	0.112653	0.405249							TRBV7-7			SMARCA2
sp|O15091|MRRP3_HUMAN	KIAA0391	MRRP3_HUMAN Mitochondrial ribonuclease P protein 3	7	184.538	258	244.863	229.134	240.061	243.615	259.354	247.677	1.08093	0.472141	0.112268	0.325929							SLC2A14			PRPF38A
sp|Q9NZJ6|COQ3_HUMAN	COQ3	COQ3_HUMAN Hexaprenyldihydroxybenzoate methyltransferase, mitochondrial	3	150.358	165.238	168.118	161.238	178.658	153.765	189.945	174.122	1.07991	0.344173	0.11091	0.463223						SLC25A51	KCNJ12			GTF3C1	RMND5B
sp|Q9H3N1|TMX1_HUMAN	TMX1	TMX1_HUMAN Thioredoxin-related transmembrane protein 1	13	716.821	831.689	836.334	794.948	872.024	820.591	882.499	858.371	1.07978	0.218731	0.110742	0.660089
sp|Q6ZNB6|NFXL1_HUMAN	NFXL1	NFXL1_HUMAN NF-X1-type zinc finger protein NFXL1	1	15.8334	18.7194	15.1052	16.5527	18.7082	17.2384	17.6583	17.8683	1.07948	0.329861	0.110337	0.481669										TCF7L1
sp|O75879|GATB_HUMAN	PET112	GATB_HUMAN Glutamyl-tRNA(Gln) amidotransferase subunit B, mitochondrial	5	146.308	214.015	196.487	185.603	191.083	192.621	216.824	200.176	1.07851	0.542793	0.109046	0.265366										YPEL1
sp|Q96EY1|DNJA3_HUMAN	DNAJA3	DNJA3_HUMAN DnaJ homolog subfamily A member 3, mitochondrial	15	462.6	616.416	541.527	540.181	590.788	557.685	598.17	582.214	1.07781	0.413644	0.108108	0.383374							NPFFR2			ING4
sp|Q9NZW5|MPP6_HUMAN	MPP6	MPP6_HUMAN MAGUK p55 subfamily member 6	3	133.611	110.815	114.528	119.651	121.342	140.029	125.401	128.924	1.07749	0.363915	0.10768	0.439001							TRBV5-6			SIX2
sp|Q9BQ95|ECSIT_HUMAN	ECSIT	ECSIT_HUMAN Evolutionarily conserved signaling intermediate in Toll pathway, mitochondrial	8	316.666	373.345	353.313	347.775	344.917	385.109	393.796	374.607	1.07716	0.297204	0.107227	0.526945							OR11H12			KLF1
sp|P55084|ECHB_HUMAN	HADHB	ECHB_HUMAN Trifunctional enzyme subunit beta, mitochondrial	28	1224.21	1565.95	1568.34	1452.83	1544.24	1544.16	1605.56	1564.66	1.07697	0.39013	0.106975	0.408791							PCDHAC1			NUP98
sp|Q9H2W6|RM46_HUMAN	MRPL46	RM46_HUMAN 39S ribosomal protein L46, mitochondrial	12	894.333	1009.29	1157.74	1020.46	1083.29	1065.5	1146.14	1098.31	1.07629	0.385953	0.106072	0.413465							TRPV5			SNRNP40
sp|P35914|HMGCL_HUMAN	HMGCL	HMGCL_HUMAN Hydroxymethylglutaryl-CoA lyase, mitochondrial	8	600.525	723.742	663.858	662.709	694.873	723.72	720.992	713.195	1.07618	0.241401	0.105922	0.617261							PLPPR5			PBX3
sp|Q9Y2Z4|SYYM_HUMAN	YARS2	SYYM_HUMAN Tyrosine--tRNA ligase, mitochondrial	16	492.007	611.085	595.472	566.188	607.539	585.673	634.308	609.173	1.07592	0.342211	0.105572	0.465706
sp|Q16773|KAT1_HUMAN	CCBL1	KAT1_HUMAN Kynurenine--oxoglutarate transaminase 1	1	42.379	43.1831	40.5819	42.048	43.5744	44.3689	47.6403	45.1946	1.07483	0.0978422	0.104112	1.00947		TMC8				MTIF3	GJA4			EMG1	METTL21A
sp|Q8TBM8|DJB14_HUMAN	DNAJB14	DJB14_HUMAN DnaJ homolog subfamily B member 14	3	102.48	122.039	114.683	113.067	128.579	107.397	128.46	121.479	1.07439	0.405786	0.103524	0.391703							NPY1R			INO80B
sp|P29353-6|SHC1_HUMAN	SHC1	SHC1_HUMAN Isoform 6 of SHC-transforming protein 1	3	145.647	146.27	138.759	143.559	150.315	164.953	147.091	154.12	1.07357	0.153164	0.102411	0.814842
sp|P82914|RT15_HUMAN	MRPS15	RT15_HUMAN 28S ribosomal protein S15, mitochondrial	8	277.147	403.787	389.41	356.782	381.282	362.522	405.236	383.014	1.07352	0.565207	0.102354	0.247792							ULBP3			SOX1
sp|Q13438|OS9_HUMAN	OS9	OS9_HUMAN Protein OS-9	17	826.691	973.395	924.286	908.124	983.906	951.708	987.994	974.536	1.07313	0.210828	0.101827	0.676071										TXNL4A
sp|Q96CS3|FAF2_HUMAN	FAF2	FAF2_HUMAN FAS-associated factor 2	17	881.756	1120.1	1033.68	1011.84	1063.89	1038.81	1154.78	1085.83	1.07312	0.396943	0.101807	0.401272							OR4A8			MED17
sp|Q10570|CPSF1_HUMAN	CPSF1	CPSF1_HUMAN Cleavage and polyadenylation specificity factor subunit 1	2	26.7992	25.7226	36.43	29.6506	34.3038	29.8263	31.3046	31.8116	1.07288	0.585651	0.10149	0.232361						TCAIM	KIR2DS1			H2BC12	SAT1
sp|Q6EMK4|VASN_HUMAN	VASN	VASN_HUMAN Vasorin	12	422.343	519.694	486.318	476.118	500.782	532.23	499.195	510.735	1.07271	0.32006	0.101256	0.494769
sp|O60832|DKC1_HUMAN	DKC1	DKC1_HUMAN H/ACA ribonucleoprotein complex subunit 4	8	427.853	342.176	424.774	398.268	453.881	401.007	426.255	427.048	1.07226	0.418575	0.100657	0.378227							NLGN4X			ID4	YTHDC2
sp|Q96BD0|SO4A1_HUMAN	SLCO4A1	SO4A1_HUMAN Solute carrier organic anion transporter family member 4A1	3	442.774	547.42	424.217	471.47	520.69	483.23	511.829	505.25	1.07165	0.445756	0.0998293	0.350903
sp|P50336|PPOX_HUMAN	PPOX	PPOX_HUMAN Protoporphyrinogen oxidase	10	246.622	306.726	277.602	276.983	301.099	270.998	318.165	296.754	1.07138	0.422796	0.0994684	0.37387										ZNF142
sp|Q8NBM8|PCYXL_HUMAN	PCYOX1L	PCYXL_HUMAN Prenylcysteine oxidase-like	1	14.0168	17.6222	17.1001	16.2464	14.0529	20.9127	17.2426	17.4027	1.07118	0.638554	0.0991957	0.194803										VSX2
sp|P55060|XPO2_HUMAN	CSE1L	XPO2_HUMAN Exportin-2	24	2008.51	1637.03	1552.08	1732.54	1840.85	2009.91	1715.93	1855.56	1.07101	0.49489	0.0989685	0.305491						TIMM9	LAIR1			HDX	SH2D1A
sp|O75964|ATP5L_HUMAN	ATP5L	ATP5L_HUMAN ATP synthase subunit g, mitochondrial	10	493.278	479.485	577.526	516.763	484.604	559.275	616.264	553.381	1.07086	0.495661	0.0987712	0.304815		NCLN		ST8SIA4		HIBADH	CLEC12A			CSNK2A1	ETNK1
sp|O43505|B3GN1_HUMAN	B3GNT1	B3GN1_HUMAN N-acetyllactosaminide beta-1,3-N-acetylglucosaminyltransferase	2	37.6926	45.4338	43.0041	42.0435	43.9564	43.5384	47.5641	45.0196	1.07079	0.319227	0.0986703	0.495901		PIGL		TRAPPC11		LETMD1	CSF1R			DCAF13	GDPGP1
sp|Q9Y289|SC5A6_HUMAN	SLC5A6	SC5A6_HUMAN Sodium-dependent multivitamin transporter	1	83.6037	88.8371	85.814	86.0849	82.4952	99.3576	94.6449	92.1659	1.07064	0.310962	0.0984723	0.507292
sp|Q8NBQ5|DHB11_HUMAN	HSD17B11	DHB11_HUMAN Estradiol 17-beta-dehydrogenase 11	6	340.021	377.768	352.705	356.831	358.864	391.594	394.633	381.697	1.06969	0.193787	0.0971864	0.712674							PTH2R			PHTF2
sp|Q15526|SURF1_HUMAN	SURF1	SURF1_HUMAN Surfeit locus protein 1	13	480.005	570.661	592.425	547.697	553.736	581.882	621.944	585.854	1.06967	0.390993	0.0971628	0.407831
sp|Q6P087|RUSD3_HUMAN	RPUSD3	RUSD3_HUMAN RNA pseudouridylate synthase domain-containing protein 3	2	57.8705	60.2391	50.2303	56.1133	59.6107	61.9377	58.5135	60.0206	1.06963	0.287068	0.0971152	0.542016										ZNF763
sp|O14672|ADA10_HUMAN	ADAM10	ADA10_HUMAN Disintegrin and metalloproteinase domain-containing protein 10	6	153.554	193.916	176.949	174.806	193.611	181.135	186.006	186.917	1.06928	0.378825	0.0966431	0.421562		CYP2A13		COG5	GLA	ATP5MC3	AQP10	RAP2C		ASH2L	ARHGAP6	WIPI1	WDR24
sp|Q9HA77|SYCM_HUMAN	CARS2	SYCM_HUMAN Probable cysteine--tRNA ligase, mitochondrial	8	514.475	624.521	623.791	587.595	593.134	641.031	648.218	627.461	1.06785	0.380072	0.0947024	0.420135		SUCO				MTCH1	GABRR3			ELL	LYPLAL1
sp|P80303-2|NUCB2_HUMAN	NUCB2	NUCB2_HUMAN Isoform 2 of Nucleobindin-2	30	1913.44	2050.09	2416.79	2126.77	2370.98	2263.27	2176.96	2270.41	1.06754	0.421199	0.0942841	0.375513										TMX4
sp|O15270|SPTC2_HUMAN	SPTLC2	SPTC2_HUMAN Serine palmitoyltransferase 2	1	55.1085	68.8711	64.289	62.7562	69.6638	62.4793	68.7643	66.9691	1.06713	0.414752	0.0937375	0.382211
sp|P55209|NP1L1_HUMAN	NAP1L1	NP1L1_HUMAN Nucleosome assembly protein 1-like 1	7	411.27	277.778	333.363	340.803	361.132	387.65	342.166	363.649	1.06703	0.606244	0.0936072	0.217352										SUPT6H
sp|Q8N2K0-2|ABD12_HUMAN	ABHD12	ABD12_HUMAN Isoform 2 of Monoacylglycerol lipase ABHD12	4	112.96	137.572	134.305	128.279	141.18	125.671	143.656	136.836	1.06671	0.420946	0.0931654	0.375774		ATP10B	TMED1	B3GNT4	ATP6V1E1	ACSM2B	ADGRG5	EHD3	IDI2	AKIRIN2	ADSS1	FAM134C	DEPDC5	VPS4A
sp|Q5T4S7-2|UBR4_HUMAN	UBR4	UBR4_HUMAN Isoform 2 of E3 ubiquitin-protein ligase UBR4	7	281.295	252.103	223.098	252.165	271.024	288.415	247.412	268.95	1.06656	0.460446	0.0929717	0.336822
sp|P00505|AATM_HUMAN	GOT2	AATM_HUMAN Aspartate aminotransferase, mitochondrial	35	1554.95	1946.92	1832.16	1778.01	1859.72	1887.86	1937.37	1894.98	1.06579	0.379619	0.0919208	0.420652							OR9A4			NOP2
sp|Q6P4E1-4|CASC4_HUMAN	CASC4	CASC4_HUMAN Isoform 4 of Protein CASC4	14	1016.63	1011.19	1031.69	1019.84	1137.74	1076.06	1046.9	1086.9	1.06576	0.071107	0.091884	1.14809		SUMF1				MTCH2	GALR1			ELL2	LYST
sp|O95299|NDUAA_HUMAN	NDUFA10	NDUAA_HUMAN NADH dehydrogenase [ubiquinone] 1 alpha subcomplex subunit 10, mitochondrial	7	283.106	361.159	358.084	334.116	331.573	354.684	381.922	356.06	1.06568	0.496604	0.0917698	0.30399										TAF3
sp|P08195|4F2_HUMAN	SLC3A2	4F2_HUMAN 4F2 cell-surface antigen heavy chain	71	3333.15	5106.29	3891.95	4110.46	4327.13	4279.01	4534.58	4380.24	1.06563	0.63706	0.0917094	0.195819
sp|Q9UNW1|MINP1_HUMAN	MINPP1	MINP1_HUMAN Multiple inositol polyphosphate phosphatase 1	1	10.8791	14.1102	17.0797	14.023	14.1656	13.7098	16.9245	14.9333	1.06492	0.680377	0.090742	0.167251							TRBV10-1			SETD7
sp|P61764-2|STXB1_HUMAN	STXBP1	STXB1_HUMAN Isoform 2 of Syntaxin-binding protein 1	4	146.759	123.725	125.043	131.842	136.355	150.45	134.391	140.399	1.0649	0.396496	0.0907192	0.401761
sp|Q9NX18|SDHF2_HUMAN	SDHAF2	SDHF2_HUMAN Succinate dehydrogenase assembly factor 2, mitochondrial	12	761.883	849.407	986.808	866.033	858.297	976.385	930.139	921.607	1.06417	0.494022	0.0897302	0.306254										ZRSR2
sp|Q9UNH7|SNX6_HUMAN	SNX6	SNX6_HUMAN Sorting nexin-6	6	359.375	286.253	290.257	311.962	338.219	347.231	310.275	331.909	1.06394	0.489074	0.0894157	0.310626
sp|Q12768|STRUM_HUMAN	KIAA0196	STRUM_HUMAN WASH complex subunit strumpellin	8	203.168	147.518	223.723	191.469	203.811	217.859	189.291	203.654	1.06363	0.641236	0.089003	0.192982							SLC2A11			PRPF3
sp|Q96A35|RM24_HUMAN	MRPL24	RM24_HUMAN 39S ribosomal protein L24, mitochondrial	6	302.896	383.806	373.107	353.27	354.195	363.294	409.063	375.517	1.06298	0.506565	0.0881085	0.295365							TREML2			SMC1A
sp|Q6UB28|MAP12_HUMAN	METAP1D	MAP12_HUMAN Methionine aminopeptidase 1D, mitochondrial	3	112.849	135.354	135.777	127.993	135.518	130.33	142.239	136.029	1.06279	0.38883	0.0878499	0.41024							TRAV7			SCAF11
sp|P55809|SCOT1_HUMAN	OXCT1	SCOT1_HUMAN Succinyl-CoA:3-ketoacid coenzyme A transferase 1, mitochondrial	60	2705.43	3114.77	3327.09	3049.1	3481.02	2554	3685.68	3240.23	1.06269	0.652219	0.0877152	0.185607										UBLCP1
sp|Q9NXW2-2|DJB12_HUMAN	DNAJB12	DJB12_HUMAN Isoform 2 of DnaJ homolog subfamily B member 12	1	14.6325	15.6398	17.7087	15.9937	18.1365	16.5511	16.2999	16.9958	1.06266	0.403028	0.0876797	0.394665							NPTN			INKA2
sp|Q9HCU5|PREB_HUMAN	PREB	PREB_HUMAN Prolactin regulatory element-binding protein	8	375.97	410.807	460.98	415.919	403.298	447.219	475.059	441.859	1.06237	0.467286	0.0872822	0.330417										ZNF214
sp|O94985|CSTN1_HUMAN	CLSTN1	CSTN1_HUMAN Calsyntenin-1	2	52.67	69.9297	52.9396	58.5131	56.3358	65.0338	65.0349	62.1348	1.0619	0.601861	0.0866433	0.220504						SCO1	HTR1E			GAR1	PMM2
sp|P49591|SYSC_HUMAN	SARS	SYSC_HUMAN Serine--tRNA ligase, cytoplasmic	1	127.166	87.9583	90.8849	102.003	127.042	80.5722	117.207	108.274	1.06148	0.757259	0.0860724	0.120756										ZNF830
sp|Q969N2|PIGT_HUMAN	PIGT	PIGT_HUMAN GPI transamidase component PIG-T	12	494.177	560.001	581.166	545.115	558.545	548.267	628.44	578.417	1.06109	0.411262	0.085551	0.385881										ZBTB8A
sp|Q6PML9|ZNT9_HUMAN	SLC30A9	ZNT9_HUMAN Zinc transporter 9	4	126.258	157.744	156.906	146.969	153.737	156.323	157.764	155.942	1.06105	0.437971	0.0854922	0.358555
sp|O00762|UBE2C_HUMAN	UBE2C	UBE2C_HUMAN Ubiquitin-conjugating enzyme E2 C	1	32.203	26.2552	21.8642	26.7741	26.4042	32.2407	26.5676	28.4042	1.06088	0.670605	0.0852644	0.173533
sp|Q9BSF4|CS052_HUMAN	C19orf52	CS052_HUMAN Uncharacterized protein C19orf52	2	51.6891	65.5635	59.5434	58.932	62.4608	61.9212	63.1538	62.5119	1.06075	0.424841	0.0850804	0.371774		SEC61G				MRPL47	F11R			DUSP4	IGBP1
sp|Q15067|ACOX1_HUMAN	ACOX1	ACOX1_HUMAN Peroxisomal acyl-coenzyme A oxidase 1	18	778.655	968.083	971.89	906.209	927.475	951.241	1004.17	960.963	1.06042	0.463973	0.0846368	0.333508		CLN8		CHST13	CTSS	AQP8	AMER3	RAB17	TMEM35A	ARL6IP4	ALPK1	STX17	RRAGA
sp|Q4KMQ2-2|ANO6_HUMAN	ANO6	ANO6_HUMAN Isoform 2 of Anoctamin-6	5	180.87	195.192	177.322	184.461	188.697	194.228	203.842	195.589	1.06033	0.188588	0.084507	0.724487		ERLIN1		GOLGA1	SZT2	COX5B	CCR8	ZFYVE16		CACTIN	CCT6A
sp|Q9BRR6|ADPGK_HUMAN	ADPGK	ADPGK_HUMAN ADP-dependent glucokinase	7	247.614	281.275	275.199	268.03	277.272	286.861	288.293	284.142	1.06011	0.2141	0.0842206	0.669383		CYP3A4		DAOA	ITFG2	BAK1	ATP1B1	SH3GL2		ATR	ASB8
sp|O14548|COX7R_HUMAN	COX7A2L	COX7R_HUMAN Cytochrome c oxidase subunit 7A-related protein, mitochondrial	9	523.893	505.441	528.411	519.248	441.005	628.619	581.382	550.335	1.05987	0.61313	0.0838865	0.212448						SUCLG1	KCNV2			H2AC4	RRM1
sp|Q13155|AIMP2_HUMAN	AIMP2	AIMP2_HUMAN Aminoacyl tRNA synthase complex-interacting multifunctional protein 2	3	125.606	73.1354	94.8157	97.8522	91.7343	121.111	98.1189	103.655	1.0593	0.758756	0.0831087	0.119898		DDOST		FUT6	MCOLN3	CCDC90B	BMPR1A	SNX8		BAZ2B	BECN2
sp|P23193|TCEA1_HUMAN	TCEA1	TCEA1_HUMAN Transcription elongation factor A protein 1	1	11.4509	6.43752	13.1854	10.3579	9.97669	12.0461	10.8848	10.9692	1.05901	0.786439	0.0827203	0.104335
sp|P54826|GAS1_HUMAN	GAS1	GAS1_HUMAN Growth arrest-specific protein 1	1	47.1239	47.1791	44.241	46.1813	50.194	51.4267	45.0884	48.903	1.05894	0.277916	0.0826151	0.556087							OR5H8			NCAPG2
sp|P22061-2|PIMT_HUMAN	PCMT1	PIMT_HUMAN Isoform 2 of Protein-L-isoaspartate(D-aspartate) O-methyltransferase	5	355.434	342.81	338.986	345.743	360.372	359.672	377.883	365.976	1.05852	0.0595475	0.0820458	1.22514										VGLL3
tr|H0Y327|H0Y327_HUMAN	MTHFD1L	H0Y327_HUMAN Monofunctional C1-tetrahydrofolate synthase, mitochondrial (Fragment)	2	105.336	123.417	128.204	118.986	133.07	108.43	136.168	125.889	1.05802	0.571087	0.081362	0.243298										SRSF11
sp|P61006|RAB8A_HUMAN	RAB8A	RAB8A_HUMAN Ras-related protein Rab-8A	10	797.037	795.425	685.818	759.427	788.194	823.148	798.906	803.416	1.05792	0.314002	0.0812368	0.503067										ZNF503
sp|O95466-3|FMNL_HUMAN	FMNL1	FMNL_HUMAN Isoform 3 of Formin-like protein 1	2	83.9749	63.3461	54.0484	67.1232	76.7484	70.508	65.7527	71.003	1.0578	0.700914	0.0810703	0.154335							OR52E4			MSL3P1
sp|Q7Z6M4|MTER2_HUMAN	MTERFD2	MTER2_HUMAN mTERF domain-containing protein 2	2	106.483	105.608	119.347	110.479	123.175	112.861	114.545	116.86	1.05776	0.308258	0.0810085	0.511086										SPTY2D1
sp|Q9UL15-2|BAG5_HUMAN	BAG5	BAG5_HUMAN Isoform 2 of BAG family molecular chaperone regulator 5	1	21.3927	16.7026	18.2123	18.7692	20.5152	20.2275	18.7759	19.8395	1.05703	0.510493	0.080011	0.29201		PIGV		TRAPPC6B		MALSU1	CXCR1			DCUN1D1	GLRX
sp|P42892|ECE1_HUMAN	ECE1	ECE1_HUMAN Endothelin-converting enzyme 1	49	2139.08	2016.85	1983.95	2046.63	2168.13	2157.32	2164.44	2163.3	1.05701	0.0692016	0.0799835	1.15988							OR10T2			KDM5C
sp|Q15006|EMC2_HUMAN	EMC2	EMC2_HUMAN ER membrane protein complex subunit 2	10	198.869	250.597	243.711	231.059	234.874	242.667	255.051	244.197	1.05686	0.488661	0.0797875	0.310992							OR2A5			LMO2
sp|Q9H0D6|XRN2_HUMAN	XRN2	XRN2_HUMAN 5'-3' exoribonuclease 2	6	244.918	242.572	281.062	256.184	304.269	233.555	274.217	270.68	1.05659	0.578108	0.0794093	0.237991
sp|Q9Y6G3|RM42_HUMAN	MRPL42	RM42_HUMAN 39S ribosomal protein L42, mitochondrial	7	273.365	318.069	365.313	318.915	317.744	309.539	382.632	336.639	1.05557	0.641094	0.0780271	0.193078							TRPC6			SNRK
sp|P46100|ATRX_HUMAN	ATRX	ATRX_HUMAN Transcriptional regulator ATRX	6	133.981	162.985	173.888	156.952	183.61	141.859	171.524	165.664	1.05551	0.639018	0.0779421	0.194487		PDIA4		TMEM130		IMMP2L	CNTN5			CWC15	FEM1C
sp|Q86YH6|DLP1_HUMAN	PDSS2	DLP1_HUMAN Decaprenyl-diphosphate synthase subunit 2	1	19.2676	23.7019	28.4989	23.8228	24.8798	26.2583	24.289	25.1424	1.05539	0.653953	0.0777772	0.184454										YAF2
sp|Q13084|RM28_HUMAN	MRPL28	RM28_HUMAN 39S ribosomal protein L28, mitochondrial	6	163.549	214.594	221.572	199.905	194.684	216.553	221.642	210.96	1.0553	0.611117	0.0776516	0.213876							TRGC2			SMC3
sp|O60762|DPM1_HUMAN	DPM1	DPM1_HUMAN Dolichol-phosphate mannosyltransferase	12	665.156	720.287	772.549	719.33	776.342	676.882	823.901	759.042	1.05521	0.497385	0.0775246	0.303307							OR10A5			ISY1
sp|O00559|RCAS1_HUMAN	EBAG9	RCAS1_HUMAN Receptor-binding cancer antigen expressed on SiSo cells	2	55.4917	59.0878	55.849	56.8095	64.2567	58.9685	56.6066	59.9439	1.05517	0.283837	0.0774808	0.546931							OR10Q1			KDM4E
sp|P49914|MTHFS_HUMAN	MTHFS	MTHFS_HUMAN 5-formyltetrahydrofolate cyclo-ligase	3	84.7922	100.75	101.436	95.6594	99.3907	102.299	101.027	100.906	1.05484	0.394328	0.0770273	0.404142										SRSF2
sp|Q9BS26|ERP44_HUMAN	ERP44	ERP44_HUMAN Endoplasmic reticulum resident protein 44	16	908.75	842.128	961.003	903.961	910.178	951.547	998.782	953.502	1.05481	0.312239	0.0769769	0.505513							OR2T10			MAZ
sp|P61026|RAB10_HUMAN	RAB10	RAB10_HUMAN Ras-related protein Rab-10	11	627.44	652.211	543.703	607.785	680.362	610.707	632.05	641.04	1.05471	0.439269	0.0768531	0.35727										ZNF444
sp|P52292|IMA1_HUMAN	KPNA2	IMA1_HUMAN Importin subunit alpha-1	16	754.798	689.887	662.809	702.498	829.164	675.864	715.335	740.121	1.05356	0.520319	0.0752669	0.283731							SLC47A2			PUS3
sp|Q96BW9|TAM41_HUMAN	TAMM41	TAM41_HUMAN Mitochondrial translocator assembly and maintenance protein 41 homolog	5	158.288	151.904	150.218	153.47	158.913	165.775	160.376	161.688	1.05355	0.0633655	0.0752574	1.19815
sp|P40939|ECHA_HUMAN	HADHA	ECHA_HUMAN Trifunctional enzyme subunit alpha, mitochondrial	60	2931.88	3864.62	3865.09	3553.86	3717.46	3349.89	4152.08	3739.81	1.05232	0.656699	0.0735786	0.182634							PCDHA9			NUP93
sp|Q13443|ADAM9_HUMAN	ADAM9	ADAM9_HUMAN Disintegrin and metalloproteinase domain-containing protein 9	14	1047.35	1028.72	1009.28	1028.45	1050.18	1103.7	1091.75	1081.87	1.05195	0.0526169	0.0730621	1.27887		CYP2B6		COG8	GNS	ATP5MF	ARHGEF39	RASSF9		ASXL3	ARHGDIG
sp|P49590|SYHM_HUMAN	HARS2	SYHM_HUMAN Probable histidine--tRNA ligase, mitochondrial	3	136.159	173.96	161.106	157.075	173.435	157.393	164.856	165.228	1.05191	0.534986	0.0730051	0.271657							PCDHB10			OARD1
sp|Q9Y2S7|PDIP2_HUMAN	POLDIP2	PDIP2_HUMAN Polymerase delta-interacting protein 2	14	460.632	583.212	551.562	531.802	545.525	555.383	577.29	559.399	1.05189	0.507053	0.07299	0.294946										ZMAT3
sp|O95562|SFT2B_HUMAN	SFT2D2	SFT2B_HUMAN Vesicle transport protein SFT2B	2	100.6	60.4151	93.272	84.7623	86.3085	95.268	85.9003	89.1589	1.05187	0.74718	0.0729572	0.126575
sp|Q92973|TNPO1_HUMAN	TNPO1	TNPO1_HUMAN Transportin-1	15	917.48	809.937	794.994	840.804	891.713	920.706	840.173	884.197	1.05161	0.391403	0.072599	0.407376
sp|Q6ZSR9|YJ005_HUMAN		YJ005_HUMAN Uncharacterized protein FLJ45252	1	12.5376	9.7301	8.90685	10.3915	10.6409	11.5174	10.6126	10.9236	1.05121	0.664551	0.0720444	0.177472
sp|O95363|SYFM_HUMAN	FARS2	SYFM_HUMAN Phenylalanine--tRNA ligase, mitochondrial	5	241.764	309.779	303.503	285.015	295.688	291.119	312.012	299.606	1.05119	0.553843	0.072029	0.256613							OR4K3			METTL21C
sp|O43772|MCAT_HUMAN	SLC25A20	MCAT_HUMAN Mitochondrial carnitine/acylcarnitine carrier protein	6	212.027	247.555	242.979	234.187	242.689	231.755	264.054	246.166	1.05115	0.459306	0.0719704	0.337898
sp|Q92544|TM9S4_HUMAN	TM9SF4	TM9S4_HUMAN Transmembrane 9 superfamily member 4	10	387.471	427.519	414.341	409.777	447.624	381.942	462.024	430.53	1.05065	0.489766	0.0712756	0.310012
sp|P39059|COFA1_HUMAN	COL15A1	COFA1_HUMAN Collagen alpha-1(XV) chain	1	18.8511	20.9333	20.4912	20.0918	19.49	22.9167	20.8927	21.0998	1.05017	0.44084	0.0706177	0.355719						SLC25A22	ITGA3			GON7	PTGES3
sp|Q9UNP9|PPIE_HUMAN	PPIE	PPIE_HUMAN Peptidyl-prolyl cis-trans isomerase E	4	203.028	219.386	221.513	214.642	222.811	217.771	235.294	225.292	1.04962	0.245125	0.0698625	0.610613										ZNF132
sp|A1L0T0|ILVBL_HUMAN	ILVBL	ILVBL_HUMAN Acetolactate synthase-like protein	18	910.098	1038.42	1023.43	990.651	1025.03	1034.65	1059.41	1039.7	1.04951	0.3056	0.069712	0.514846							SEMA4D			POLR2K
sp|P16035|TIMP2_HUMAN	TIMP2	TIMP2_HUMAN Metalloproteinase inhibitor 2	3	148.095	180.315	162.412	163.607	190.696	159.842	164.443	171.66	1.04922	0.579917	0.0693185	0.236634
sp|P51665|PSMD7_HUMAN	PSMD7	PSMD7_HUMAN 26S proteasome non-ATPase regulatory subunit 7	8	404.735	322.58	353.456	360.257	381.805	410.234	341.845	377.961	1.04914	0.599663	0.0692118	0.222093										ZNF324B
tr|J3KNL6|J3KNL6_HUMAN	SEC16A	J3KNL6_HUMAN Protein transport protein Sec16A	20	980.166	826.131	750.011	852.103	906.79	896.931	876.419	893.38	1.04844	0.578136	0.0682467	0.23797										ZSCAN18
sp|Q92643|GPI8_HUMAN	PIGK	GPI8_HUMAN GPI-anchor transamidase	2	43.5923	49.9039	47.7966	47.0976	50.8459	46.5001	50.7386	49.3615	1.04807	0.388639	0.0677336	0.410454										ZBTB7A
sp|Q14667|K0100_HUMAN	KIAA0100	K0100_HUMAN UPF0378 protein KIAA0100	1	9.05734	11.7675	10.7294	10.5181	11.9379	9.8973	11.2346	11.0233	1.04803	0.63694	0.0676792	0.195901							SLC2A1			PRPF18
sp|Q14160|SCRIB_HUMAN	SCRIB	SCRIB_HUMAN Protein scribble homolog	30	845.354	1155.57	1006.46	1002.46	1119.4	969.42	1062.75	1050.52	1.04795	0.654861	0.0675641	0.183851										ZNF883
sp|Q96P70|IPO9_HUMAN	IPO9	IPO9_HUMAN Importin-9	12	700.04	607.995	549.513	619.183	638.993	708.269	599.11	648.791	1.04782	0.613851	0.0673879	0.211937							SIT1			POT1
sp|P35354|PGH2_HUMAN	PTGS2	PGH2_HUMAN Prostaglandin G/H synthase 2	4	110.997	111.148	108.746	110.297	110.525	117.384	118.713	115.541	1.04754	0.11931	0.0670091	0.923324										ZNF350
sp|P31948|STIP1_HUMAN	STIP1	STIP1_HUMAN Stress-induced-phosphoprotein 1	22	2183.95	1499.87	1681.14	1788.32	1789.22	2002.11	1827.95	1873.09	1.0474	0.713286	0.066816	0.146736
sp|Q8NI36|WDR36_HUMAN	WDR36	WDR36_HUMAN WD repeat-containing protein 36	7	193.286	179.264	191.69	188.08	197.225	191.737	201.989	196.983	1.04734	0.17018	0.0667287	0.769092
sp|Q9NZC3|GDE1_HUMAN	GDE1	GDE1_HUMAN Glycerophosphodiester phosphodiesterase 1	2	42.5956	52.6009	50.3523	48.5163	56.938	42.2747	53.2212	50.8113	1.0473	0.68969	0.0666811	0.161346							OR5M8			NEDD8
sp|P51153|RAB13_HUMAN	RAB13	RAB13_HUMAN Ras-related protein Rab-13	3	101.157	114.825	94.3642	103.449	112.438	107.127	105.437	108.334	1.04722	0.486276	0.0665668	0.313117										ZNF454
sp|Q8WWQ0|PHIP_HUMAN	PHIP	PHIP_HUMAN PH-interacting protein	10	274.618	329.45	343.961	316.01	396.685	271.104	324.828	330.872	1.04703	0.741661	0.0663062	0.129795										ZBTB40
sp|Q4V328|GRAP1_HUMAN	GRIPAP1	GRAP1_HUMAN GRIP1-associated protein 1	1	18.3102	11.1662	12.4562	13.9775	16.1945	14.5055	13.1772	14.6257	1.04637	0.79761	0.0653982	0.0982093							PAG1			NRF1
sp|Q02252|MMSA_HUMAN	ALDH6A1	MMSA_HUMAN Methylmalonate-semialdehyde dehydrogenase [acylating], mitochondrial	14	639.151	803.596	711.75	718.166	767.444	685.828	801.067	751.446	1.04634	0.600468	0.0653535	0.22151		DPAGT1		GALNT9	RRAGA	COA6	CADM1	VPS37B		BRD3	CACNB3
sp|Q7Z417|NUFP2_HUMAN	NUFIP2	NUFP2_HUMAN Nuclear fragile X mental retardation-interacting protein 2	3	167.897	101.96	134.874	134.91	123.759	158.946	140.761	141.155	1.04629	0.786629	0.0652819	0.10423										TOX2
sp|Q9UKM7|MA1B1_HUMAN	MAN1B1	MA1B1_HUMAN Endoplasmic reticulum mannosyl-oligosaccharide 1,2-alpha-mannosidase	20	1011.1	1058	1069.51	1046.2	1116.07	1044.32	1122.58	1094.32	1.04599	0.193091	0.0648732	0.714238							TMEM266			RORC
sp|Q9P015|RM15_HUMAN	MRPL15	RM15_HUMAN 39S ribosomal protein L15, mitochondrial	14	768.547	985.354	993.456	915.785	945.303	884.665	1043.68	957.882	1.04597	0.653836	0.0648388	0.184531							TRBV7-9			SMARCA5
sp|Q96BQ5|CC127_HUMAN	CCDC127	CC127_HUMAN Coiled-coil domain-containing protein 127	3	69.8381	96.9138	77.9845	81.5788	79.2315	87.3316	89.4005	85.3212	1.04587	0.685873	0.0647098	0.163756		TMED4				MTRF1	GJB1			EN2	MLPH
sp|Q92667|AKAP1_HUMAN	AKAP1	AKAP1_HUMAN A-kinase anchor protein 1, mitochondrial	14	606.22	744.417	689.765	680.134	728.173	691.986	713.81	711.323	1.04586	0.494498	0.0646856	0.305836		DERL3		GAL3ST2	NAAA	CHCHD4	BSG	STEAP3		BCL6B	BLMH
sp|P49821|NDUV1_HUMAN	NDUFV1	NDUV1_HUMAN NADH dehydrogenase [ubiquinone] flavoprotein 1, mitochondrial	11	380.683	475.747	433.072	429.834	467.042	371.883	509.687	449.537	1.04584	0.708949	0.0646611	0.149385										TCEA3
sp|Q5T5C0|STXB5_HUMAN	STXBP5	STXB5_HUMAN Syntaxin-binding protein 5	2	32.7551	37.3208	28.0353	32.7037	35.3139	36.5316	30.7457	34.1971	1.04566	0.665725	0.0644173	0.176705
sp|P18031|PTN1_HUMAN	PTPN1	PTN1_HUMAN Tyrosine-protein phosphatase non-receptor type 1	20	1291.69	1370.98	1452.32	1371.66	1419.27	1373.39	1509.27	1433.98	1.04543	0.366016	0.0640948	0.436499										ZNF358
sp|O75718|CRTAP_HUMAN	CRTAP	CRTAP_HUMAN Cartilage-associated protein	17	756.075	1134.56	1088.57	993.067	1038.3	953.062	1121.48	1037.61	1.04486	0.746823	0.0633043	0.126782						TIMM23B	KLRG1			HDAC1	SERPINB9
sp|Q12996|CSTF3_HUMAN	CSTF3	CSTF3_HUMAN Cleavage stimulation factor subunit 3	2	85.3001	70.1507	90.1943	81.8817	90.4272	85.2741	80.7121	85.4711	1.04384	0.618207	0.0618962	0.208866						TOMM22	LILRB2			HES6	SNCB
sp|O95347|SMC2_HUMAN	SMC2	SMC2_HUMAN Structural maintenance of chromosomes protein 2	12	517.662	433.121	444.945	465.243	448.094	540.454	467.141	485.23	1.04296	0.632064	0.0606843	0.199239
tr|H0YH31|H0YH31_HUMAN	BCKDHA	H0YH31_HUMAN 2-oxoisovalerate dehydrogenase subunit alpha, mitochondrial (Fragment)	1	9.04359	12.5259	10.0642	10.5446	10.1473	12.0811	10.7613	10.9966	1.04287	0.721283	0.0605549	0.141894		POMGNT2		XYLT1		METAP1D	DLG2			DDX52	GPSM3
sp|Q16270|IBP7_HUMAN	IGFBP7	IBP7_HUMAN Insulin-like growth factor-binding protein 7	5	319.831	416.385	363.651	366.622	385.177	390.453	371.208	382.28	1.04271	0.611932	0.0603345	0.213297							SCN3A			POLR1B
sp|Q00577|PURA_HUMAN	PURA	PURA_HUMAN Transcriptional activator protein Pur-alpha	2	50.1271	48.6049	57.6395	52.1238	53.4791	53.0686	56.4081	54.3186	1.04211	0.502827	0.0595029	0.298582										ZNF410
sp|Q9BSH5|HDHD3_HUMAN	HDHD3	HDHD3_HUMAN Haloacid dehalogenase-like hydrolase domain-containing protein 3	1	19.2088	20.5404	19.7919	19.847	21.8911	19.416	20.7408	20.6826	1.0421	0.361775	0.0594977	0.441561							PCDHB6			ORC4
sp|Q8NFF5|FAD1_HUMAN	FLAD1	FAD1_HUMAN FAD synthase	4	72.6861	88.1562	88.5013	83.1145	81.754	91.5691	86.4994	86.6075	1.04203	0.587821	0.0593915	0.230755							OR52A5			MRTFB
sp|A6NJ78|MET15_HUMAN	METTL15	MET15_HUMAN Probable methyltransferase-like protein 15	3	68.0118	87.7025	83.0513	79.5885	76.0057	85.6772	86.9603	82.8811	1.04137	0.656994	0.0584823	0.182439							TRAV8-3			SCAND1
sp|P08174-7|DAF_HUMAN	CD55	DAF_HUMAN Isoform 7 of Complement decay-accelerating factor	5	331.796	460.589	341.771	378.052	406.803	387.934	386.279	393.672	1.04132	0.728147	0.0584102	0.137781		TXNDC12				NDUFB5	GPR119			ETV3L	NBPF6
sp|Q9NQ50|RM40_HUMAN	MRPL40	RM40_HUMAN 39S ribosomal protein L40, mitochondrial	11	596.443	760.218	743.534	700.065	704.616	712.552	769.618	728.929	1.04123	0.632951	0.0582882	0.19863							TRPC4			SNAPC5
sp|O95999|BCL10_HUMAN	BCL10	BCL10_HUMAN B-cell lymphoma/leukemia 10	1	46.1236	35.0633	36.851	39.3459	40.7445	47.1757	34.9586	40.9596	1.04101	0.759347	0.0579868	0.11956		POMT1		YIF1A		MFN2	DLGAP2			DDX54	GPX1
tr|E9PSI1|E9PSI1_HUMAN	TM9SF1	E9PSI1_HUMAN Transmembrane 9 superfamily member 1	12	439.821	445.825	433.239	439.628	476.905	441.412	453.986	457.434	1.0405	0.181047	0.0572804	0.74221
sp|Q9UIG0|BAZ1B_HUMAN	BAZ1B	BAZ1B_HUMAN Tyrosine-protein kinase BAZ1B	4	119.523	127.147	156.23	134.3	142.721	134.379	142.079	139.726	1.0404	0.661632	0.0571427	0.179383		PLOD1		UST		MCCD1	CYSLTR2			DDX27	GNMT
sp|P52732|KIF11_HUMAN	KIF11	KIF11_HUMAN Kinesin-like protein KIF11	6	483.052	406.126	389.393	426.19	465.99	457.979	406.088	443.352	1.04027	0.644147	0.0569561	0.191015							SLC38A4			PRRX1
sp|P82921|RT21_HUMAN	MRPS21	RT21_HUMAN 28S ribosomal protein S21, mitochondrial	1	27.6299	49.6042	47.3511	41.5284	43.6322	43.5426	42.4097	43.1948	1.04013	0.823304	0.0567599	0.0844399							VANGL1			SOX18
sp|P26012|ITB8_HUMAN	ITGB8	ITB8_HUMAN Integrin beta-8	3	110.276	111.719	107.186	109.727	115.287	108.661	118.302	114.084	1.0397	0.238351	0.0561677	0.622782							SLC1A2			PPWD1
sp|P31930|QCR1_HUMAN	UQCRC1	QCR1_HUMAN Cytochrome b-c1 complex subunit 1, mitochondrial	25	908.358	1102.18	1092.82	1034.45	1006.22	1097.37	1120.92	1074.83	1.03904	0.605542	0.0552472	0.217855
sp|Q9ULC3|RAB23_HUMAN	RAB23	RAB23_HUMAN Ras-related protein Rab-23	6	470.22	526.477	487.922	494.873	536.283	488.296	517.971	514.183	1.03902	0.424001	0.0552243	0.372633										ZNF471
sp|P22695|QCR2_HUMAN	UQCRC2	QCR2_HUMAN Cytochrome b-c1 complex subunit 2, mitochondrial	34	1645.35	1954.22	1846.3	1815.29	1830.98	1827.38	1997.24	1885.2	1.03851	0.54719	0.0545168	0.261861
sp|Q9Y6I3-1|EPN1_HUMAN	EPN1	EPN1_HUMAN Isoform 2 of Epsin-1	8	242.939	238.197	236.586	239.241	247.498	250.362	247.171	248.344	1.03805	0.013522	0.0538756	1.86896							OR2G6			MACROD2
sp|Q86Y56|HEAT2_HUMAN	HEATR2	HEAT2_HUMAN HEAT repeat-containing protein 2	1	33.4134	30.6785	29.7638	31.2852	32.1148	35.4917	29.8186	32.475	1.03803	0.580117	0.0538483	0.236485							PCDHB9			OSR1
sp|Q9UKE5|TNIK_HUMAN	TNIK	TNIK_HUMAN TRAF2 and NCK-interacting protein kinase	1	47.3199	39.1783	38.5042	41.6675	44.8836	47.1955	37.6498	43.2429	1.03781	0.716189	0.0535431	0.144972
sp|Q9NX08|COMD8_HUMAN	COMMD8	COMD8_HUMAN COMM domain-containing protein 8	3	177.334	152.129	145.49	158.318	135.284	203.962	153.638	164.295	1.03775	0.805373	0.0534616	0.0940027						SLC25A35	KCNA3			GTF2A2	RBP5
sp|Q9H6T3|RPAP3_HUMAN	RPAP3	RPAP3_HUMAN RNA polymerase II-associated protein 3	2	59.3724	45.9822	46.4717	50.6088	51.6978	57.7112	48.1112	52.5068	1.0375	0.733704	0.0531156	0.134479										ZNF649
sp|Q8NCF5|NF2IP_HUMAN	NFATC2IP	NF2IP_HUMAN NFATC2-interacting protein	1	12.4063	10.8451	11.6412	11.6309	10.1645	15.0249	11.0026	12.064	1.03724	0.795829	0.0527535	0.0991801										TCF23
sp|O95747|OXSR1_HUMAN	OXSR1	OXSR1_HUMAN Serine/threonine-protein kinase OSR1	9	515.531	432.67	378.038	442.08	477.895	489.093	408.423	458.47	1.03708	0.74624	0.0525217	0.127121										UBR5
sp|Q9Y2R9|RT07_HUMAN	MRPS7	RT07_HUMAN 28S ribosomal protein S7, mitochondrial	8	353.666	450.494	469.025	424.395	418.181	449.937	452.144	440.088	1.03698	0.696431	0.052383	0.157122							XCR1			SP6
sp|P50990|TCPQ_HUMAN	CCT8	TCPQ_HUMAN T-complex protein 1 subunit theta	30	1876.34	1408.12	1442.09	1575.52	1567.67	1890.71	1441.18	1633.18	1.0366	0.789025	0.0518612	0.102909		TOR2A				NDUFAF4	GNG14			ESR2	NBPF10
sp|Q8NDC0|MISSL_HUMAN	MAPK1IP1L	MISSL_HUMAN MAPK-interacting and spindle-stabilizing protein-like	1	46.1164	22.9359	32.7116	33.9213	38.5325	32.5145	34.3977	35.1482	1.03617	0.868452	0.0512598	0.061254							TRAC			RPS19BP1
sp|Q8N8A6|DDX51_HUMAN	DDX51	DDX51_HUMAN ATP-dependent RNA helicase DDX51	1	139.071	163.628	166.431	156.377	165.879	154.013	166.151	162.014	1.03605	0.587388	0.0510923	0.231075							MRGPRX4			HOXB5	TTPA
sp|Q16775|GLO2_HUMAN	HAGH	GLO2_HUMAN Hydroxyacylglutathione hydrolase, mitochondrial	4	275.275	370.903	338.851	328.343	332.245	341.397	346.703	340.115	1.03585	0.699921	0.0508206	0.154951							PCDHAC2			NUPR2
sp|Q8TEY7|UBP33_HUMAN	USP33	UBP33_HUMAN Ubiquitin carboxyl-terminal hydrolase 33	1	16.2131	17.3476	16.0839	16.5482	18.0134	16.476	16.9316	17.1403	1.03578	0.384891	0.0507195	0.414662
sp|O75152|ZC11A_HUMAN	ZC3H11A	ZC11A_HUMAN Zinc finger CCCH domain-containing protein 11A	2	62.0823	69.6551	81.528	71.0885	78.3922	69.9097	72.5596	73.6205	1.03562	0.703406	0.050492	0.152794
sp|O95777|NAA38_HUMAN	NAA38	NAA38_HUMAN N-alpha-acetyltransferase 38, NatC auxiliary subunit	1	9.91157	11.3848	12.509	11.2684	12.5473	10.7364	11.7188	11.6675	1.03541	0.685656	0.0502064	0.163893										SUMO2
sp|Q8WVV9|HNRLL_HUMAN	HNRNPLL	HNRLL_HUMAN Heterogeneous nuclear ribonucleoprotein L-like	2	112.846	96.8684	102.021	103.912	107.503	115.529	99.7403	107.591	1.0354	0.604501	0.0501931	0.218603							PROKR2			PGBD5
sp|O75489|NDUS3_HUMAN	NDUFS3	NDUS3_HUMAN NADH dehydrogenase [ubiquinone] iron-sulfur protein 3, mitochondrial	16	884.56	1017.21	1068.59	990.12	966.089	1060.36	1045.32	1023.92	1.03414	0.615326	0.0484324	0.210894										TBX4
sp|P42126|ECI1_HUMAN	ECI1	ECI1_HUMAN Enoyl-CoA delta isomerase 1, mitochondrial	11	734.991	897.944	843.878	825.604	835.014	874.986	851.339	853.78	1.03413	0.59827	0.048413	0.223103							OR11A1			KDM8
sp|Q9BXR0|TGT_HUMAN	QTRT1	TGT_HUMAN Queuine tRNA-ribosyltransferase	1	15.7206	15.1136	15.3107	15.3816	17.3066	12.027	18.3857	15.9065	1.03412	0.803353	0.0484043	0.0950936										ZNF443
sp|O43491|E41L2_HUMAN	EPB41L2	E41L2_HUMAN Band 4.1-like protein 2	14	552.064	600.76	560.673	571.166	636.419	567.925	567.58	590.641	1.0341	0.516006	0.0483735	0.287345							OR2C3			LUC7L2
sp|P09758|TACD2_HUMAN	TACSTD2	TACD2_HUMAN Tumor-associated calcium signal transducer 2	2	42.2815	59.4106	51.2764	50.9895	55.7367	49.3235	53.0794	52.7132	1.03381	0.760664	0.0479642	0.118807
sp|Q9BZG1|RAB34_HUMAN	RAB34	RAB34_HUMAN Ras-related protein Rab-34	6	287.005	252.666	214.995	251.555	263.82	261.898	254.456	260.058	1.0338	0.706144	0.0479579	0.151107										ZNF486
sp|Q96FQ6|S10AG_HUMAN	S100A16	S10AG_HUMAN Protein S100-A16	4	210.892	129.486	155.088	165.155	149.17	215.527	147.462	170.72	1.03369	0.873753	0.0478045	0.0586111										ZNF806
sp|Q9BY67-3|CADM1_HUMAN	CADM1	CADM1_HUMAN Isoform 3 of Cell adhesion molecule 1	4	293.71	427.098	393.009	371.272	374.747	386.266	390.205	383.74	1.03358	0.77237	0.0476508	0.112175		SOAT1				MRPS30	FRAS1			EBF3	KRT28
sp|P06493|CDK1_HUMAN	CDK1	CDK1_HUMAN Cyclin-dependent kinase 1	2	152.865	89.2063	90.2573	110.776	107.206	126.575	109.701	114.494	1.03357	0.873463	0.0476315	0.0587557		WFS1				NUBPL	GPR20			FAM9B	NMI
sp|Q16637|SMN_HUMAN	SMN1	SMN_HUMAN Survival motor neuron protein	1	29.9992	20.4149	25.272	25.2287	26.4219	24.3011	27.4795	26.0675	1.03325	0.788194	0.0471894	0.103367
sp|P11021|GRP78_HUMAN	HSPA5	GRP78_HUMAN 78 kDa glucose-regulated protein	104	4991.64	7110.01	5746.35	5949.34	6201.54	5759.69	6469.96	6143.73	1.03268	0.780935	0.0463866	0.107385							REM2			PKP2
sp|Q92692|PVRL2_HUMAN	PVRL2	PVRL2_HUMAN Poliovirus receptor-related protein 2	7	222.317	245.542	225.63	231.163	249.642	231.109	235.375	238.709	1.03264	0.456599	0.0463402	0.340465										ZNF417
sp|Q7LBR1|CHM1B_HUMAN	CHMP1B	CHM1B_HUMAN Charged multivesicular body protein 1b	5	248.758	208.073	189.945	215.592	211.962	262.405	193.506	222.624	1.03262	0.80703	0.0463086	0.0931104						PDSS1	GRID1			FOXC2	PAFAH1B3
sp|Q14004|CDK13_HUMAN	CDK13	CDK13_HUMAN Cyclin-dependent kinase 13	3	125.562	105.46	106.068	112.363	120.56	117.745	109.754	116.02	1.03255	0.645029	0.0462049	0.190421		WRB				NUDT9	GPR21			FAM9C	NNMT
sp|O14639|ABLM1_HUMAN	ABLIM1	ABLM1_HUMAN Actin-binding LIM protein 1	2	84.5469	66.1873	80.6964	77.1435	72.7945	87.3783	78.7793	79.6507	1.0325	0.738721	0.046142	0.13152		AUP1	TMED7	B3GNT9	ATP6V1G3	ACSS1	ADGRV1	GRIPAP1	NUDT19	ALX3	AGBL3	GABARAPL1	KPTN
sp|Q9BSJ8-2|ESYT1_HUMAN	ESYT1	ESYT1_HUMAN Isoform 2 of Extended synaptotagmin-1	39	2150.25	2512.76	2659.6	2440.87	2563.8	2386.88	2606.86	2519.18	1.03208	0.661064	0.0455568	0.179756							OR2T12			MBD2
sp|P49006|MRP_HUMAN	MARCKSL1	MRP_HUMAN MARCKS-related protein	1	96.0781	91.3523	80.3964	89.2756	92.9118	95.8076	87.6311	92.1169	1.03183	0.615485	0.0451987	0.210783							TRAV1-2			RRP12
sp|Q96CW5|GCP3_HUMAN	TUBGCP3	GCP3_HUMAN Gamma-tubulin complex component 3	1	19.0745	18.018	17.6127	18.2351	20.0613	19.0289	17.3437	18.8113	1.0316	0.558485	0.0448841	0.252989
sp|Q8TCC3-2|RM30_HUMAN	MRPL30	RM30_HUMAN Isoform 2 of 39S ribosomal protein L30, mitochondrial	5	314.839	428.351	431.792	391.661	379.786	350.354	481.794	403.978	1.03145	0.834773	0.0446705	0.0784314							TRGV2			SMC6
sp|Q9HCS7|SYF1_HUMAN	XAB2	SYF1_HUMAN Pre-mRNA-splicing factor SYF1	3	102.719	101.801	110.439	104.987	116.675	106.089	102.047	108.27	1.03128	0.558414	0.044433	0.253044
sp|O95140|MFN2_HUMAN	MFN2	MFN2_HUMAN Mitofusin-2	11	389.049	444.765	437.156	423.657	410.787	435.33	464.544	436.887	1.03123	0.601402	0.0443646	0.220835							TRAV9-2			SCML2
sp|Q9BX68|HINT2_HUMAN	HINT2	HINT2_HUMAN Histidine triad nucleotide-binding protein 2, mitochondrial	6	314.848	383.13	355.97	351.316	311.994	407.62	366.953	362.189	1.03095	0.765673	0.0439749	0.115957							PCDHGA8			PALB2
sp|O15294|OGT1_HUMAN	OGT	OGT1_HUMAN UDP-N-acetylglucosamine--peptide N-acetylglucosaminyltransferase 110 kDa subunit	2	72.1603	58.8926	52.7669	61.2733	60.4424	71.5611	57.4928	63.1654	1.03088	0.804332	0.0438778	0.0945645										TSPYL1
sp|O95292|VAPB_HUMAN	VAPB	VAPB_HUMAN Vesicle-associated membrane protein-associated protein B/C	18	987.939	1115.4	1124.04	1075.79	1092.55	981.987	1252.2	1108.91	1.03079	0.731294	0.0437503	0.135908
sp|P30405|PPIF_HUMAN	PPIF	PPIF_HUMAN Peptidyl-prolyl cis-trans isomerase F, mitochondrial	8	295.155	409.311	368.223	357.563	420.361	279.891	404.805	368.352	1.03017	0.855584	0.0428879	0.0677373										ZNF133
sp|O95361|TRI16_HUMAN	TRIM16	TRI16_HUMAN Tripartite motif-containing protein 16	2	90.0185	68.7605	68.8209	75.8666	84.2547	80.6043	69.5538	78.1376	1.02993	0.798932	0.0425517	0.0974904
sp|P06730-2|IF4E_HUMAN	EIF4E	IF4E_HUMAN Isoform 2 of Eukaryotic translation initiation factor 4E	2	118.291	83.0193	94.6188	98.6431	93.2754	116.408	95.1023	101.595	1.02993	0.828403	0.0425445	0.0817581							OR1J4			LEUTX
sp|Q3SXM5|HSDL1_HUMAN	HSDL1	HSDL1_HUMAN Inactive hydroxysteroid dehydrogenase-like protein 1	4	221.442	259.1	226.971	235.837	244.478	251.629	232.435	242.847	1.02972	0.618544	0.0422572	0.20863							PTPRU			PIH1D1
sp|O95249|GOSR1_HUMAN	GOSR1	GOSR1_HUMAN Golgi SNAP receptor complex member 1	2	101.194	93.223	99.9163	98.111	96.3854	111.779	94.8715	101.012	1.02957	0.650851	0.0420375	0.186518							OR8U9			NOP10
sp|Q5QJE6|TDIF2_HUMAN	DNTTIP2	TDIF2_HUMAN Deoxynucleotidyltransferase terminal-interacting protein 2	7	204.353	197.575	201.136	201.021	233.795	186.806	200.167	206.923	1.02936	0.697359	0.0417427	0.156544							OPN4			IRX5
sp|P24941|CDK2_HUMAN	CDK2	CDK2_HUMAN Cyclin-dependent kinase 2	4	122.238	96.3412	96.8428	105.141	110.541	119.139	94.9832	108.221	1.0293	0.795028	0.0416609	0.0996177		XXYLT1				OAT	GPR22			FAN1	NOS2
sp|O14974|MYPT1_HUMAN	PPP1R12A	MYPT1_HUMAN Protein phosphatase 1 regulatory subunit 12A	10	388.774	378.553	376.214	381.18	418.891	374.709	383.357	392.319	1.02922	0.472497	0.0415532	0.325601										ZNF148
sp|Q13442|HAP28_HUMAN	PDAP1	HAP28_HUMAN 28 kDa heat- and acid-stable phosphoprotein	2	67.2456	39.0499	38.2435	48.1797	46.1667	53.8203	48.7705	49.5858	1.02919	0.892814	0.0415025	0.0492392										WBP4
sp|Q9UHN6|TMEM2_HUMAN	TMEM2	TMEM2_HUMAN Transmembrane protein 2	3	79.0202	83.0188	70.6602	77.5664	89.2664	71.7251	78.4927	79.828	1.02916	0.736658	0.0414636	0.132734
sp|Q86TM6|SYVN1_HUMAN	SYVN1	SYVN1_HUMAN E3 ubiquitin-protein ligase synoviolin	3	159.472	196.724	191.248	182.481	197.726	179.45	186.195	187.79	1.02909	0.69915	0.041375	0.155429
sp|Q8NBS9|TXND5_HUMAN	TXNDC5	TXND5_HUMAN Thioredoxin domain-containing protein 5	15	603.839	928.579	819.435	783.951	864.981	677.995	876.951	806.642	1.02895	0.853348	0.0411661	0.0688738
sp|Q8TCZ2-5|C99L2_HUMAN	CD99L2	C99L2_HUMAN Isoform 5 of CD99 antigen-like protein 2	3	190.95	240.759	217.787	216.499	228.875	224.068	215.331	222.758	1.02891	0.696562	0.0411181	0.15704		UGT1A8				NDUFS6	GPR153			FAF1	NEURL2
sp|Q9UBI6|GBG12_HUMAN	GNG12	GBG12_HUMAN Guanine nucleotide-binding protein G(I)/G(S)/G(O) subunit gamma-12	7	357.152	205.89	327.351	296.798	237.157	361.464	317.331	305.317	1.02871	0.891903	0.0408295	0.0496825							OR8B3			NKX3-2
sp|P08107|HSP71_HUMAN	HSPA1A	HSP71_HUMAN Heat shock 70 kDa protein 1A/1B	51	3760.55	2760.91	2797.51	3106.33	3124.14	3351.67	3110.47	3195.43	1.02868	0.804255	0.0408002	0.0946063							RECK			PKNOX1
sp|P05198|IF2A_HUMAN	EIF2S1	IF2A_HUMAN Eukaryotic translation initiation factor 2 subunit 1	3	105.941	68.652	82.4443	85.6791	86.0314	100.868	77.4997	88.1331	1.02864	0.85784	0.0407403	0.0665937							OR14L1P			KNOP1
sp|P62136-2|PP1A_HUMAN	PPP1CA	PP1A_HUMAN Isoform 2 of Serine/threonine-protein phosphatase PP1-alpha catalytic subunit	6	198.284	178.257	182.589	186.377	204.615	187.027	183.307	191.65	1.02829	0.587615	0.040249	0.230907										ZNF143
sp|Q9UQ90|SPG7_HUMAN	SPG7	SPG7_HUMAN Paraplegin	5	123.441	143.514	141.231	136.062	135.669	135.192	148.764	139.875	1.02802	0.648433	0.0398705	0.188135
sp|P22087|FBRL_HUMAN	FBL	FBRL_HUMAN rRNA 2'-O-methyltransferase fibrillarin	15	1243.04	1245.09	1313.91	1267.34	1391.84	1140.49	1376.2	1302.84	1.02801	0.696233	0.0398553	0.157245							OR4Q2			MINDY3
sp|Q93063-3|EXT2_HUMAN	EXT2	EXT2_HUMAN Isoform 3 of Exostosin-2	2	44.4426	49.5866	49.5563	47.8618	50.4102	38.5563	58.6341	49.2002	1.02796	0.836368	0.0397883	0.0776025							OR2Z1			MECP2
sp|Q9H5K3|SG196_HUMAN	POMK	SG196_HUMAN Protein O-mannose kinase	1	9.97869	11.5016	11.736	11.0721	11.2695	11.2995	11.5747	11.3812	1.02792	0.609931	0.0397284	0.21472										ZMYM3
sp|P07951-2|TPM2_HUMAN	TPM2	TPM2_HUMAN Isoform 2 of Tropomyosin beta chain	2	97.2527	61.6645	83.0708	80.6627	75.0738	100.685	72.9607	82.9065	1.02782	0.87742	0.0395846	0.0567925
sp|Q6ZRK6|CCD73_HUMAN	CCDC73	CCD73_HUMAN Coiled-coil domain-containing protein 73	1	128.742	132.003	131.51	130.752	123.962	148.211	130.899	134.357	1.02758	0.646435	0.0392458	0.189475		TMEM235				NDUFA11	GJD3			ERCC5	MTURN
sp|P06756|ITAV_HUMAN	ITGAV	ITAV_HUMAN Integrin alpha-V	50	2634.19	2950.91	2718.19	2767.76	3015.29	2686.24	2822.08	2841.2	1.02653	0.614059	0.0377816	0.21179							SLC17A1			PPP1R7
sp|Q02818|NUCB1_HUMAN	NUCB1	NUCB1_HUMAN Nucleobindin-1	34	1852.27	1960.16	2342.52	2051.65	1984.91	2216.97	2116.31	2106.06	1.02652	0.75557	0.0377644	0.121725										TMPO
tr|E9PIE4|E9PIE4_HUMAN	MTCH2	E9PIE4_HUMAN Mitochondrial carrier homolog 2 (Fragment)	1	83.2575	100.853	96.1582	93.4227	88.3851	95.0138	104.245	95.8813	1.02632	0.74269	0.0374754	0.129192										SPO11
sp|Q9BX95|SGPP1_HUMAN	SGPP1	SGPP1_HUMAN Sphingosine-1-phosphate phosphatase 1	1	36.6152	44.6368	45.0309	42.0943	44.3441	38.4086	46.837	43.1965	1.02619	0.781201	0.0372913	0.107237
sp|Q9H7D0|DOCK5_HUMAN	DOCK5	DOCK5_HUMAN Dedicator of cytokinesis protein 5	1	13.1975	14.1182	8.58904	11.9682	13.8436	12.2054	10.7884	12.2791	1.02598	0.879503	0.0369997	0.0557625							OPRD1			IRX6
sp|Q9NVA2-2|SEP11_HUMAN	SEPT11	SEP11_HUMAN Isoform 2 of Septin-11	10	469.133	322.89	325.796	372.606	376.674	403.992	366.138	382.268	1.02593	0.854965	0.0369325	0.0680517										ZZZ3
sp|Q70UQ0-4|IKIP_HUMAN	IKBIP	IKIP_HUMAN Isoform 4 of Inhibitor of nuclear factor kappa-B kinase-interacting protein	19	909.006	1168.69	1268.47	1115.39	1050.86	1161.46	1220.56	1144.29	1.02592	0.818716	0.0369115	0.0868667							SCN9A			POLR2B
sp|Q8NCW5|NNRE_HUMAN	APOA1BP	NNRE_HUMAN NAD(P)H-hydrate epimerase	9	331.985	380.813	375.7	362.833	334.606	390.541	391.284	372.144	1.02566	0.721507	0.0365555	0.14176		FMO4		HS3ST3B1		CYP27A1	CD79A			CCNH	COMMD2
sp|Q96EE3-1|SEH1_HUMAN	SEH1L	SEH1_HUMAN Isoform B of Nucleoporin SEH1	3	43.8013	34.7289	37.3292	38.6198	39.5237	41.5522	37.7493	39.6084	1.0256	0.751356	0.0364655	0.124154										ZSCAN5B
sp|P09001|RM03_HUMAN	MRPL3	RM03_HUMAN 39S ribosomal protein L3, mitochondrial	13	490.833	623.466	619.175	577.825	596.284	554.365	627.007	592.552	1.02549	0.775812	0.0363098	0.110243							TRGJ1			SMC5
sp|P19022|CADH2_HUMAN	CDH2	CADH2_HUMAN Cadherin-2	20	812.479	1072.85	979.686	955.005	1014.29	923.921	998.852	979.02	1.02515	0.781927	0.035831	0.106834		VKORC1				NSUN4	GPR183			FAM76B	NLRP8
sp|Q14554|PDIA5_HUMAN	PDIA5	PDIA5_HUMAN Protein disulfide-isomerase A5	4	177.531	245.634	253.248	225.471	208.129	235.55	249.429	231.036	1.02468	0.846519	0.035177	0.0723633										WRAP53
sp|Q9BTV4|TMM43_HUMAN	TMEM43	TMM43_HUMAN Transmembrane protein 43	16	932.426	1055.49	995.407	994.442	879.563	1068.51	1106.98	1018.35	1.02404	0.776561	0.0342754	0.109825
sp|Q8WUD4|CCD12_HUMAN	CCDC12	CCD12_HUMAN Coiled-coil domain-containing protein 12	3	106.952	104.433	106.485	105.957	116.207	105.139	104.145	108.497	1.02397	0.554479	0.0341772	0.256115		TMCC3				MTRES1	GJA9			EN1	MIOX
sp|Q96A33|CCD47_HUMAN	CCDC47	CCD47_HUMAN Coiled-coil domain-containing protein 47	30	1399.07	1811.04	1674.09	1628.07	1714.96	1585.59	1699.03	1666.53	1.02362	0.778438	0.0336861	0.108776		TMEM174				NADK2	GJB6			EPC1	MOCS3
sp|Q9P2E5|CHPF2_HUMAN	CHPF2	CHPF2_HUMAN Chondroitin sulfate glucuronyltransferase	1	28.2976	29.8907	32.7263	30.3049	30.9003	31.4132	30.7021	31.0052	1.02311	0.621878	0.0329584	0.206295						PMPCA	GRIN2D			FOXE3	PCK1
sp|Q8NEJ9|NGDN_HUMAN	NGDN	NGDN_HUMAN Neuroguidin	1	36.9763	35.4699	44.9284	39.1249	43.9106	37.9909	38.1692	40.0235	1.02297	0.811074	0.0327622	0.0909395										TCF7L2
sp|P82663|RT25_HUMAN	MRPS25	RT25_HUMAN 28S ribosomal protein S25, mitochondrial	5	121.453	157.534	161.393	146.793	146.485	150.297	153.652	150.145	1.02283	0.807637	0.0325685	0.0927841							VN1R1			SOX30
sp|O95159|ZFPL1_HUMAN	ZFPL1	ZFPL1_HUMAN Zinc finger protein-like 1	3	113.723	115.126	122.315	117.055	106.6	132.757	119.819	119.725	1.02282	0.755441	0.0325475	0.1218
sp|Q14527|HLTF_HUMAN	HLTF	HLTF_HUMAN Helicase-like transcription factor	2	99.8323	89.6935	83.315	90.9469	110.625	59.1079	109.276	93.0028	1.02261	0.912743	0.0322491	0.0396513							PLET1			PAXX
sp|Q9NV06|DCA13_HUMAN	DCAF13	DCA13_HUMAN DDB1- and CUL4-associated factor 13	3	62.6523	78.2317	71.3085	70.7308	77.2186	64.5845	75.0773	72.2935	1.02209	0.806199	0.0315259	0.0935576							MC4R			HNRNPA3	TGM6
sp|Q14C86-6|GAPD1_HUMAN	GAPVD1	GAPD1_HUMAN Isoform 6 of GTPase-activating protein and VPS9 domain-containing protein 1	13	451.156	370.001	349.842	390.333	381.244	438.53	376.912	398.895	1.02194	0.827358	0.0313052	0.0823067							OR5H14			NAV2
sp|P61758|PFD3_HUMAN	VBP1	PFD3_HUMAN Prefoldin subunit 3	5	331.433	206.601	242.7	260.245	261.515	308.059	228.149	265.908	1.02176	0.90322	0.031056	0.0442062
sp|Q8TC12|RDH11_HUMAN	RDH11	RDH11_HUMAN Retinol dehydrogenase 11	7	419.239	468.934	471.999	453.39	479.166	427.148	483.408	463.241	1.02173	0.712495	0.0310081	0.147218										ZNF578
sp|Q96H55|MYO19_HUMAN	MYO19	MYO19_HUMAN Unconventional myosin-XIX	4	237.057	269.051	248.008	251.372	238.222	262.591	269.289	256.701	1.0212	0.709425	0.0302624	0.149094										STN1
sp|O15382|BCAT2_HUMAN	BCAT2	BCAT2_HUMAN Branched-chain-amino-acid aminotransferase, mitochondrial	15	603.492	733.775	712.725	683.331	708.959	650.574	733.53	697.688	1.02101	0.776538	0.0299981	0.109837		POGLUT2		VPS53		ME2	DCUN1D3			DDX50	GPD1
sp|Q9HDC9|APMAP_HUMAN	APMAP	APMAP_HUMAN Adipocyte plasma membrane-associated protein	28	1226.32	1479.42	1355.27	1353.67	1475.49	1269.58	1400.39	1381.82	1.02079	0.780964	0.0296927	0.107369		FMO3		HS3ST3A1		CYP24A1	CD58			CCNG1	COLCA2
sp|Q712K3|UB2R2_HUMAN	UBE2R2	UB2R2_HUMAN Ubiquitin-conjugating enzyme E2 R2	1	21.0627	22.4023	20.8115	21.4255	20.1599	23.507	21.916	21.861	1.02033	0.708776	0.0290292	0.149491
sp|Q15024|EXOS7_HUMAN	EXOSC7	EXOS7_HUMAN Exosome complex component RRP42	3	78.7124	73.4933	79.1165	77.1074	75.7989	90.1229	70.0994	78.6737	1.02031	0.813748	0.0290127	0.0895099							OR2Y1			MEAF6
sp|Q9NX63|CHCH3_HUMAN	CHCHD3	CHCH3_HUMAN Coiled-coil-helix-coiled-coil-helix domain-containing protein 3, mitochondrial	18	1209.12	1476.3	1320.19	1335.2	1198.56	1411.43	1476.83	1362.27	1.02027	0.824419	0.0289541	0.0838518						PDHB	GPR82			FLYWCH1	OTUB1
sp|O75787|RENR_HUMAN	ATP6AP2	RENR_HUMAN Renin receptor	7	230.152	242.618	263.179	245.316	254.838	253.587	241.999	250.141	1.01967	0.668599	0.0280986	0.174835		NUS1		STX10		HINT2	CLEC4C			CSRNP3	FABP7
sp|P57740|NU107_HUMAN	NUP107	NU107_HUMAN Nuclear pore complex protein Nup107	5	225.111	200.311	201.501	208.975	206.433	227.5	205.088	213.007	1.0193	0.729168	0.0275738	0.137173										TOX4
sp|Q8IWA4|MFN1_HUMAN	MFN1	MFN1_HUMAN Mitofusin-1	8	317.072	373.006	362.709	350.929	358.925	345.338	368.753	357.672	1.01921	0.733663	0.0274583	0.134503							TRAV9-1			SCML1
sp|Q5VWZ2|LYPL1_HUMAN	LYPLAL1	LYPL1_HUMAN Lysophospholipase-like protein 1	3	55.5866	66.5607	63.6044	61.9172	61.1993	65.1728	62.8729	63.0817	1.01881	0.754379	0.0268799	0.122411							TMC1			RNF113A
sp|Q9Y6N7-2|ROBO1_HUMAN	ROBO1	ROBO1_HUMAN Isoform 2 of Roundabout homolog 1	3	98.5468	116.228	112.657	109.144	114.616	112.285	106.684	111.195	1.01879	0.745203	0.0268566	0.127726										ZNF630
sp|Q9H2G2|SLK_HUMAN	SLK	SLK_HUMAN STE20-like serine/threonine-protein kinase	3	73.2173	54.0656	56.7102	61.331	64.8842	65.0399	57.4947	62.4729	1.01862	0.868853	0.0266144	0.0610539
sp|Q9NQ39|RS10L_HUMAN	RPS10P5	RS10L_HUMAN Putative 40S ribosomal protein S10-like	1	13.8969	10.9543	10.8731	11.9081	12.1963	11.5874	12.5925	12.1254	1.01825	0.844218	0.0260899	0.0735452										ZNF709
sp|Q9NYL9|TMOD3_HUMAN	TMOD3	TMOD3_HUMAN Tropomodulin-3	14	708.865	607.707	664.496	660.356	599.56	751.612	665.345	672.172	1.01789	0.834104	0.0255867	0.0787795
sp|O60220|TIM8A_HUMAN	TIMM8A	TIM8A_HUMAN Mitochondrial import inner membrane translocase subunit Tim8 A	1	170.593	216.315	222.621	203.176	192.166	227.63	200.441	206.746	1.01757	0.864235	0.0251246	0.0633681
sp|Q96HS1|PGAM5_HUMAN	PGAM5	PGAM5_HUMAN Serine/threonine-protein phosphatase PGAM5, mitochondrial	12	571.879	664.441	668.397	634.906	594.752	650.86	691.704	645.772	1.01711	0.809677	0.0244821	0.0916883										ZBTB20
sp|Q86W92-2|LIPB1_HUMAN	PPFIBP1	LIPB1_HUMAN Isoform 2 of Liprin-beta-1	4	140.907	117.921	138.007	132.278	130.448	134.25	138.876	134.525	1.01698	0.783003	0.0242958	0.106237										ZNF117
sp|Q96DI7|SNR40_HUMAN	SNRNP40	SNR40_HUMAN U5 small nuclear ribonucleoprotein 40 kDa protein	4	161.588	204.822	176.162	180.857	200.381	168.308	183.067	183.919	1.01693	0.855104	0.0242162	0.0679812
sp|O95674|CDS2_HUMAN	CDS2	CDS2_HUMAN Phosphatidate cytidylyltransferase 2	4	176.436	204.357	197.865	192.886	206.436	179.202	202.784	196.141	1.01687	0.799646	0.02414	0.0971022						OXCT1	GPR33			FBLL1	NT5C
sp|P05165|PCCA_HUMAN	PCCA	PCCA_HUMAN Propionyl-CoA carboxylase alpha chain, mitochondrial	10	407.829	529.658	440.223	459.237	477.019	457.054	466.59	466.888	1.01666	0.845802	0.0238384	0.0727313										VENTX
sp|Q9UQ35|SRRM2_HUMAN	SRRM2	SRRM2_HUMAN Serine/arginine repetitive matrix protein 2	11	312.056	261.235	343.635	305.642	327.32	305.989	297.724	310.345	1.01539	0.863024	0.0220294	0.063977
sp|Q5RKV6|EXOS6_HUMAN	EXOSC6	EXOS6_HUMAN Exosome complex component MTR3	2	53.99	41.0287	50.8761	48.6316	50.4674	45.8026	51.8287	49.3662	1.01511	0.872972	0.0216307	0.0589997							OR2W6P			MDM4
sp|Q86Y79|PTH_HUMAN	PTRH1	PTH_HUMAN Probable peptidyl-tRNA hydrolase	1	126.372	155.215	152.992	144.86	135.393	165.51	140.215	147.039	1.01505	0.876445	0.021547	0.0572753										ZNF394
sp|P51553|IDH3G_HUMAN	IDH3G	IDH3G_HUMAN Isocitrate dehydrogenase [NAD] subunit gamma, mitochondrial	10	466.847	574.792	537.937	526.526	535.529	528.895	538.882	534.435	1.01502	0.815897	0.0215119	0.0883644							RXFP3			POLE
sp|Q9Y2X3|NOP58_HUMAN	NOP58	NOP58_HUMAN Nucleolar protein 58	18	870.04	843.952	1025.43	913.139	1037.16	778.366	962.937	926.153	1.01425	0.898229	0.0204169	0.0466132										THRAP3
sp|Q92692-2|PVRL2_HUMAN	PVRL2	PVRL2_HUMAN Isoform Alpha of Poliovirus receptor-related protein 2	1	15.2686	18.4491	15.6989	16.4722	17.8031	17.0776	15.2312	16.704	1.01407	0.862624	0.0201574	0.0641785										ZNF418
sp|P13995|MTDC_HUMAN	MTHFD2	MTDC_HUMAN Bifunctional methylenetetrahydrofolate dehydrogenase/cyclohydrolase, mitochondrial	14	971.957	1182.31	1204.54	1119.6	1130.72	975.683	1296.74	1134.38	1.0132	0.906909	0.0189177	0.0424361										SRSF12
sp|Q9BT22|ALG1_HUMAN	ALG1	ALG1_HUMAN Chitobiosyldiphosphodolichol beta-mannosyltransferase	7	358.022	398.034	419.401	391.819	405.527	387.997	397.438	396.987	1.01319	0.795819	0.0189065	0.0991859		EBPL		GBGT1	SCPEP1	COQ10B	CAP1	VPS4A		BRF1	CARD14
sp|P46060|RAGP1_HUMAN	RANGAP1	RAGP1_HUMAN Ran GTPase-activating protein 1	27	1462.72	1480.36	1854.42	1599.17	1715.96	1470.86	1672.1	1619.64	1.0128	0.89692	0.0183505	0.0472462										ZNF532
sp|Q9H0U9|TSYL1_HUMAN	TSPYL1	TSYL1_HUMAN Testis-specific Y-encoded-like protein 1	2	110.791	103.01	107.464	107.088	114.797	102.649	107.93	108.459	1.0128	0.759293	0.0183469	0.11959
sp|O95168|NDUB4_HUMAN	NDUFB4	NDUB4_HUMAN NADH dehydrogenase [ubiquinone] 1 beta subcomplex subunit 4	2	74.4771	88.3038	87.5645	83.4485	78.8234	89.4434	85.2792	84.5153	1.01278	0.854371	0.0183268	0.0683533										TBX1
sp|Q3ZCQ8-2|TIM50_HUMAN	TIMM50	TIM50_HUMAN Isoform 2 of Mitochondrial import inner membrane translocase subunit TIM50	9	346.749	416.913	402.852	388.838	366.604	400.417	414.153	393.725	1.01257	0.858297	0.0180174	0.0663624
sp|Q5SY16|NOL9_HUMAN	NOL9	NOL9_HUMAN Polynucleotide 5'-hydroxyl-kinase NOL9	5	199.565	169.711	211.328	193.535	211.953	181.363	194.429	195.915	1.0123	0.883369	0.0176365	0.0538577										TGIF2
sp|O76003|GLRX3_HUMAN	GLRX3	GLRX3_HUMAN Glutaredoxin-3	4	307.171	212.876	219.942	246.663	244.844	284.236	219.606	249.562	1.01175	0.939144	0.0168578	0.0272676							OR6S1			NHLH1
sp|O95926|SYF2_HUMAN	SYF2	SYF2_HUMAN Pre-mRNA-splicing factor SYF2	1	12.8822	9.47805	12.5318	11.6307	11.4264	13.0314	10.8315	11.7631	1.01139	0.921652	0.0163368	0.0354329
sp|Q7L8L6|FAKD5_HUMAN	FASTKD5	FAKD5_HUMAN FAST kinase domain-containing protein 5	2	120.181	166.748	151.326	146.085	146.686	134.507	161.722	147.638	1.01063	0.926415	0.0152555	0.0331945							OR4N5			MIER2
sp|Q96CM3|RUSD4_HUMAN	RPUSD4	RUSD4_HUMAN RNA pseudouridylate synthase domain-containing protein 4	1	21.4977	28.3276	28.1413	25.9889	23.9649	24.7169	30.1087	26.2635	1.01057	0.930661	0.0151623	0.0312085										ZNF764
sp|Q96S66|CLCC1_HUMAN	CLCC1	CLCC1_HUMAN Chloride channel CLIC-like protein 1	9	297.563	342.414	336.984	325.654	346.843	292.965	347.035	328.948	1.01012	0.892474	0.0145204	0.0494042						PRORP	HAVCR2			FOXN3	PGK1
sp|P98194-7|AT2C1_HUMAN	ATP2C1	AT2C1_HUMAN Isoform 7 of Calcium-transporting ATPase type 2C member 1	10	503.328	529.058	512.085	514.824	524.391	493.851	541.764	520.002	1.01006	0.761155	0.0144384	0.118527		MIA3		ST3GAL5		GPAT2	CLDN20			CPHXL	EIF3I
sp|P11216|PYGB_HUMAN	PYGB	PYGB_HUMAN Glycogen phosphorylase, brain form	2	28.98	26.3027	26.1172	27.1333	29.6426	29.6881	22.8856	27.4054	1.01003	0.916642	0.0143958	0.0378002										ZNF430
sp|P28289|TMOD1_HUMAN	TMOD1	TMOD1_HUMAN Tropomodulin-1	1	70.4523	55.1376	67.0805	64.2235	54.5915	73.3303	66.6717	64.8645	1.00998	0.933223	0.0143285	0.0300145
sp|Q9BXW7|CECR5_HUMAN	CECR5	CECR5_HUMAN Cat eye syndrome critical region protein 5	14	734.327	893.57	883.761	837.219	834.427	820.41	881.544	845.46	1.00984	0.887622	0.0141313	0.0517719						OXSM	GPR39			FBXO3	NT5C2
sp|Q8TE73|DYH5_HUMAN	DNAH5	DYH5_HUMAN Dynein heavy chain 5, axonemal	2	87.867	89.2692	92.3802	89.8388	88.2248	92.1839	91.5085	90.6391	1.00891	0.681132	0.0127946	0.166769							NPBWR1			IMUP	ZFAND5
sp|P11142|HSP7C_HUMAN	HSPA8	HSP7C_HUMAN Heat shock cognate 71 kDa protein	67	5715.26	4578.41	4570.58	4954.75	4972.92	5359.66	4655.18	4995.92	1.00831	0.928553	0.0119388	0.0321934							RFTN2			PKP3
sp|Q9P0P8|CF203_HUMAN	C6orf203	CF203_HUMAN Uncharacterized protein C6orf203	1	42.0574	50.2032	50.4034	47.5547	57.068	21.931	64.7729	47.924	1.00776	0.979442	0.0111589	0.00902122		SHISA2				MRPS15	FCRL2			DYRK1A	KBTBD13
sp|P61106|RAB14_HUMAN	RAB14	RAB14_HUMAN Ras-related protein Rab-14	20	1209.8	1068.32	1080.93	1119.68	1080.71	1146.72	1157.26	1128.23	1.00763	0.875485	0.0109658	0.0577512										ZNF460
sp|Q9H4F8-2|SMOC1_HUMAN	SMOC1	SMOC1_HUMAN Isoform 2 of SPARC-related modular calcium-binding protein 1	6	302.278	257.605	262.81	274.231	287.128	273.7	268.014	276.281	1.00747	0.899257	0.0107415	0.0461163
sp|Q96CB9|NSUN4_HUMAN	NSUN4	NSUN4_HUMAN 5-methylcytosine rRNA methyltransferase NSUN4	2	42.0505	46.2806	50.9245	46.4185	47.4041	42.4472	50.3244	46.7252	1.00661	0.93329	0.00950204	0.0299834										TLX1
sp|Q9BVP2|GNL3_HUMAN	GNL3	GNL3_HUMAN Guanine nucleotide-binding protein-like 3	6	378.215	310.617	417.334	368.722	398.368	322.761	391.982	371.037	1.00628	0.95604	0.00902919	0.0195238							OR8B8			NKX6-2
sp|O15439|MRP4_HUMAN	ABCC4	MRP4_HUMAN Multidrug resistance-associated protein 4	6	143.498	213.541	171.473	176.171	177.002	170.837	183.954	177.264	1.00621	0.96041	0.00892814	0.0175435		AMFR	PRRG4	B3GALT2	ATP6V0D2	ACOD1	ADGRA2	DENND10	FAR2	AFF2	ACSS2	ATL3	ATP6V1G1	TSG101
sp|P35579|MYH9_HUMAN	MYH9	MYH9_HUMAN Myosin-9	83	5123.47	3584.61	4004.61	4237.56	3956.88	4773.06	4059.84	4263.26	1.00606	0.963387	0.00872151	0.0161993										STAG3L1
sp|Q5TDH0-3|DDI2_HUMAN	DDI2	DDI2_HUMAN Isoform 3 of Protein DDI1 homolog 2	2	53.9474	32.8933	44.9711	43.9372	46.2933	50.3871	35.8618	44.1808	1.00554	0.975579	0.00797363	0.0107374							MFRP			HNRNPUL1	TPMT
sp|Q13601|KRR1_HUMAN	KRR1	KRR1_HUMAN KRR1 small subunit processome component homolog	1	124.509	117.878	132.718	125.035	128.559	113.476	135.142	125.726	1.00553	0.932949	0.00795126	0.0301419							SLC4A5			PWWP3A
sp|Q96R06|SPAG5_HUMAN	SPAG5	SPAG5_HUMAN Sperm-associated antigen 5	1	26.6722	23.5483	20.4343	23.5516	24.5961	24.3217	22.1242	23.6807	1.00548	0.950742	0.0078843	0.0219373
sp|Q96G21|IMP4_HUMAN	IMP4	IMP4_HUMAN U3 small nucleolar ribonucleoprotein protein IMP4	1	27.7984	23.3822	25.7086	25.6297	26.4775	23.818	26.999	25.7648	1.00527	0.937233	0.00758279	0.0281524							SEMA6A			POLR3A
sp|Q8WU90|ZC3HF_HUMAN	ZC3H15	ZC3HF_HUMAN Zinc finger CCCH domain-containing protein 15	2	96.7068	54.7572	75.7497	75.7379	70.2604	84.5274	73.5225	76.1034	1.00483	0.97868	0.00694576	0.00935931
sp|P54105|ICLN_HUMAN	CLNS1A	ICLN_HUMAN Methylosome subunit pICln	1	26.39	22.9309	27.4353	25.5854	23.9722	29.6234	23.5286	25.7081	1.0048	0.961482	0.00690202	0.0170588						ROMO1	HRH2			FUBP3	PLCXD1
sp|Q9HC07|TM165_HUMAN	TMEM165	TM165_HUMAN Transmembrane protein 165	13	520.67	533.082	564.058	539.27	534.624	565.513	525.407	541.848	1.00478	0.891265	0.00688167	0.049993
sp|Q9NPL8|TIDC1_HUMAN	TIMMDC1	TIDC1_HUMAN Complex I assembly factor TIMMDC1, mitochondrial	1	14.1461	11.8958	13.6074	13.2164	13.1717	13.8198	12.8216	13.271	1.00413	0.94463	0.00594747	0.0247381
sp|Q7Z4G4|TRM11_HUMAN	TRMT11	TRM11_HUMAN tRNA (guanine(10)-N2)-methyltransferase homolog	1	43.7017	46.4644	56.2748	48.8136	44.7874	49.505	52.743	49.0118	1.00406	0.966686	0.00584513	0.0147144
sp|Q9UNH6-3|SNX7_HUMAN	SNX7	SNX7_HUMAN Isoform 3 of Sorting nexin-7	1	23.6811	19.9467	22.0014	21.8764	23.1669	23.6844	19.0212	21.9575	1.00371	0.966753	0.00533798	0.0146843
sp|Q8NF91|SYNE1_HUMAN	SYNE1	SYNE1_HUMAN Nesprin-1	2	31.0753	40.7372	32.5578	34.7901	38.2215	35.169	31.3247	34.9051	1.00331	0.976092	0.00476043	0.0105091
sp|Q9BRT3|MIEN1_HUMAN	MIEN1	MIEN1_HUMAN Migration and invasion enhancer 1	1	31.6739	30.2866	29.8134	30.5913	32.6362	30.3392	29.0956	30.6903	1.00324	0.937051	0.0046613	0.0282369							TRBJ2-7			SETD6
sp|Q6DD88|ATLA3_HUMAN	ATL3	ATLA3_HUMAN Atlastin-3	34	1720.51	1656.44	2060.07	1812.34	1864.1	1725.19	1864.76	1818.02	1.00313	0.968148	0.00450994	0.0140582		LRIT1		SLC35A4		GDF5OS	CLCN2			CITED2	EEF1AKMT1
sp|P33316|DUT_HUMAN	DUT	DUT_HUMAN Deoxyuridine 5'-triphosphate nucleotidohydrolase, mitochondrial	16	855.654	950.712	956.79	921.052	844.742	958.533	968.035	923.77	1.00295	0.960364	0.00425045	0.0175642							OR10H5			KDM1A
sp|O95684|FR1OP_HUMAN	FGFR1OP	FR1OP_HUMAN FGFR1 oncogene partner	1	41.9876	27.1115	28.0276	32.3756	34.1128	33.6247	29.6666	32.468	1.00285	0.986178	0.00411283	0.00604465							OR51F1			MNAT1
sp|Q9H074|PAIP1_HUMAN	PAIP1	PAIP1_HUMAN Polyadenylate-binding protein-interacting protein 1	6	279.654	211.836	195.314	228.934	239.257	246.239	203.185	229.56	1.00273	0.98384	0.00393936	0.00707555										USP16
sp|P09543|CN37_HUMAN	CNP	CN37_HUMAN 2',3'-cyclic-nucleotide 3'-phosphodiesterase	16	1036.19	931.456	876.068	947.906	970.553	947.946	932.166	950.222	1.00244	0.964025	0.00352016	0.0159119						SIRT4	IGSF11			GINS2	PPP2R5B
sp|Q9Y295|DRG1_HUMAN	DRG1	DRG1_HUMAN Developmentally-regulated GTP-binding protein 1	4	160.578	110.553	146.529	139.22	120.682	163.846	134.105	139.545	1.00233	0.987577	0.00336233	0.00542908							OR10G4			KANSL1
sp|P50570-4|DYN2_HUMAN	DNM2	DYN2_HUMAN Isoform 4 of Dynamin-2	13	506.952	419.46	403.535	443.316	426.321	487.68	418.699	444.234	1.00207	0.982292	0.00298333	0.00775948							OPN1MW2			IRX3
sp|Q9BZE4|NOG1_HUMAN	GTPBP4	NOG1_HUMAN Nucleolar GTP-binding protein 1	22	965.884	981.72	1198.09	1048.57	1148.27	893.586	1110.09	1050.65	1.00199	0.985674	0.00286425	0.00626683							PCDH9			NUFIP1
sp|Q14CZ7|FAKD3_HUMAN	FASTKD3	FAKD3_HUMAN FAST kinase domain-containing protein 3	3	50.7467	63.3746	65.5464	59.8892	58.8239	54.2882	66.7749	59.9623	1.00122	0.990679	0.00176021	0.00406711							OR4N4			MICAL2
sp|Q5H943|KKLC1_HUMAN	KKLC1	KKLC1_HUMAN Kita-kyushu lung cancer antigen 1	2	114.832	115.915	125.774	118.84	105.076	129.312	122.431	118.94	1.00084	0.990649	0.00121151	0.00408031							SLC41A1			PTMA
sp|P50454|SERPH_HUMAN	SERPINH1	SERPH_HUMAN Serpin H1	33	1753.74	2298.56	2225.3	2092.53	2105.03	1863.46	2312.63	2093.71	1.00056	0.995889	0.000810117	0.0017889
sp|O43175|SERA_HUMAN	PHGDH	SERA_HUMAN D-3-phosphoglycerate dehydrogenase	29	1876.36	1532.99	1392.16	1600.5	1606.47	1703.17	1493.63	1601.09	1.00037	0.997152	0.000533871	0.00123844										ZBTB4
sp|Q86WA6|BPHL_HUMAN	BPHL	BPHL_HUMAN Valacyclovir hydrolase	6	293.507	362.948	357.427	337.961	333.843	333.017	347.196	338.019	1.00017	0.998091	0.000247161	0.000829731		RDH12				MRM1	DSG4			DLX3	GTSF1
sp|O15254|ACOX3_HUMAN	ACOX3	ACOX3_HUMAN Peroxisomal acyl-coenzyme A oxidase 3	4	99.9909	129.404	143.478	124.291	126.597	115.797	130.531	124.308	1.00014	0.999044	0.000200442	0.000415422		CNPY2		CHST14	CTSV	ARG2	AMIGO1	RAB1A	TYSND1	ARL6IP6	ALS2CL	TAX1BP1	RRAGB
sp|Q14739|LBR_HUMAN	LBR	LBR_HUMAN Lamin-B receptor	9	646.545	806.911	768.493	740.65	776.656	653.688	791.307	740.551	0.999866	0.99886	-0.000192879	0.000495506							SLCO1B7			RBBP8
sp|Q9UJ14|GGT7_HUMAN	GGT7	GGT7_HUMAN Gamma-glutamyltransferase 7	2	77.8105	93.6222	91.0015	87.4781	86.3237	89.5406	86.5333	87.4659	0.999861	0.998176	-0.000200579	0.000792681							OR6C3			NEUROG2
sp|Q96AC1-3|FERM2_HUMAN	FERMT2	FERM2_HUMAN Isoform 3 of Fermitin family homolog 2	12	684.171	562.068	611.349	619.196	640.085	626.724	589.685	618.831	0.999411	0.992906	-0.000849586	0.00309202							OR51E1			MMS22L
sp|Q15070|OXA1L_HUMAN	OXA1L	OXA1L_HUMAN Mitochondrial inner membrane protein OXA1L	12	1056.66	1301.85	1245.18	1201.23	1187.06	1191.82	1222.5	1200.46	0.999359	0.992295	-0.00092499	0.00335925										UBE3C
sp|Q9BQ52|RNZ2_HUMAN	ELAC2	RNZ2_HUMAN Zinc phosphodiesterase ELAC protein 2	6	160.472	178.123	209.13	182.575	173.067	177.618	196.682	182.456	0.999347	0.994397	-0.000942271	0.00244035							OR1Q1			LIG1
sp|P10644|KAP0_HUMAN	PRKAR1A	KAP0_HUMAN cAMP-dependent protein kinase type I-alpha regulatory subunit	3	107.014	74.541	79.6703	87.0752	86.6306	91.877	82.5334	87.0137	0.999293	0.995576	-0.00102026	0.00192563										ZNF223
sp|O60271|JIP4_HUMAN	SPAG9	JIP4_HUMAN C-Jun-amino-terminal kinase-interacting protein 4	6	256.749	224.251	198.03	226.343	244.937	238.121	195.458	226.172	0.999244	0.994413	-0.00109158	0.00243313
sp|Q9H6H4|REEP4_HUMAN	REEP4	REEP4_HUMAN Receptor expression-enhancing protein 4	1	22.8164	25.4423	26.7618	25.0068	23.5846	26.2203	25.1506	24.9852	0.999133	0.988303	-0.00125066	0.00510968										ZNF583
sp|O00410-3|IPO5_HUMAN	IPO5	IPO5_HUMAN Isoform 3 of Importin-5	28	2189.2	2078.4	2047.15	2104.91	2062.95	2144.44	2098.5	2101.96	0.998597	0.954963	-0.00202495	0.0200135							SIGLEC14			POP1
sp|O60306|AQR_HUMAN	AQR	AQR_HUMAN Intron-binding protein aquarius	1	22.603	22.3885	23.7049	22.8988	27.3577	18.8376	22.3963	22.8639	0.998474	0.989537	-0.00220273	0.0045681		GDPD3		LARGE1		DELE1	CD99L2			CDC25C	CRLF3
sp|P45954|ACDSB_HUMAN	ACADSB	ACDSB_HUMAN Short/branched chain specific acyl-CoA dehydrogenase, mitochondrial	2	51.8381	70.2471	69.3768	63.8207	61.7909	65.0579	64.3163	63.7217	0.998449	0.987785	-0.00223937	0.00533746		CCDC47		B4GALT5	CCZ1B	AK3	ADRA2C	MTMR2	PEX12	ANKRD28	AKR1C1	MAP1LC3B	MLST8
sp|Q16555|DPYL2_HUMAN	DPYSL2	DPYL2_HUMAN Dihydropyrimidinase-related protein 2	18	767.98	535.997	562.979	622.319	635.848	645.93	581.605	621.128	0.998086	0.988236	-0.00276346	0.0051393							OR10AG1			JMJD1C
sp|P37802|TAGL2_HUMAN	TAGLN2	TAGL2_HUMAN Transgelin-2	16	1083.41	723.855	783.388	863.551	841.051	942.069	802.212	861.777	0.997946	0.988806	-0.00296591	0.00488897
sp|O14745|NHRF1_HUMAN	SLC9A3R1	NHRF1_HUMAN Na(+)/H(+) exchange regulatory cofactor NHE-RF1	12	630.751	556.396	584.903	590.683	578.84	626.127	563.395	589.454	0.997919	0.967921	-0.00300522	0.0141603
sp|Q13409|DC1I2_HUMAN	DYNC1I2	DC1I2_HUMAN Cytoplasmic dynein 1 intermediate chain 2	11	502.943	410.918	392.028	435.297	439.423	463.199	400.512	434.378	0.99789	0.982259	-0.00304754	0.00777386							OR10J3			KDM2A
sp|P50851-2|LRBA_HUMAN	LRBA	LRBA_HUMAN Isoform 2 of Lipopolysaccharide-responsive and beige-like anchor protein	13	839.879	749.209	686.747	758.612	799.869	777.82	691.928	756.539	0.997267	0.971903	-0.00394785	0.0123771							TAS2R43			RFC2
sp|P21796|VDAC1_HUMAN	VDAC1	VDAC1_HUMAN Voltage-dependent anion-selective channel protein 1	46	2461.39	3153.4	2746.28	2787.02	2590.08	2768.08	2977.87	2778.67	0.997004	0.972776	-0.00432867	0.0119873
sp|Q96RT1-8|LAP2_HUMAN	ERBB2IP	LAP2_HUMAN Isoform 8 of Protein LAP2	9	353.925	469.255	440.829	421.336	427.63	393.797	438.774	420.067	0.996987	0.974437	-0.00435295	0.0112463							OR2L13			MAGEA2
sp|Q9NRX2|RM17_HUMAN	MRPL17	RM17_HUMAN 39S ribosomal protein L17, mitochondrial	3	179.137	226.744	240.064	215.315	195.73	224.752	223.286	214.589	0.996628	0.973783	-0.00487243	0.0115377							TRDC			SMARCAL1
sp|Q6UXV4|APOOL_HUMAN	APOOL	APOOL_HUMAN Apolipoprotein O-like	4	246.276	284.671	273.278	268.075	253.146	263.041	285.3	267.162	0.996595	0.953882	-0.00492076	0.0205053		G6PC		IMPAD1		DARS2	CD84			CCNT1	CRACD
sp|O75923-13|DYSF_HUMAN	DYSF	DYSF_HUMAN Isoform 13 of Dysferlin	7	356.613	339.671	319.136	338.473	343.142	351.364	316.753	337.087	0.995903	0.930996	-0.00592321	0.0310522							OR10K2			KDM4C
sp|Q9NPQ8-3|RIC8A_HUMAN	RIC8A	RIC8A_HUMAN Isoform 3 of Synembryn-A	1	32.3492	27.4294	26.3837	28.7208	31.0582	29.3198	25.4018	28.5933	0.995562	0.961571	-0.00641649	0.0170186										ZNF610
sp|O60610|DIAP1_HUMAN	DIAPH1	DIAP1_HUMAN Protein diaphanous homolog 1	13	905.549	772.913	723.68	800.714	783.244	861.732	746.457	797.144	0.995542	0.958245	-0.00644567	0.0185235							NKTR			HTATSF1	WNK1
sp|Q13586|STIM1_HUMAN	STIM1	STIM1_HUMAN Stromal interaction molecule 1	9	415.482	532.04	500.943	482.821	494.476	466.069	480.673	480.406	0.994997	0.949438	-0.0072362	0.0225334
sp|Q9UBF2|COPG2_HUMAN	COPG2	COPG2_HUMAN Coatomer subunit gamma-2	5	204.538	170.07	195.331	189.98	198.121	185.425	183.487	189.011	0.9949	0.93567	-0.00737695	0.0288772						SLC25A41	KCND3			GTF2H2	RGPD5
tr|G3V325|G3V325_HUMAN	ATP5J2-PTCD1	G3V325_HUMAN Pentatricopeptide repeat-containing protein 1, mitochondrial	4	134.018	158.236	167.589	153.281	141.995	143.554	171.853	152.467	0.994693	0.95625	-0.00767719	0.0194284		NCEH1		ST8SIA3		HEMK1	CLDN9			CRX	ETF1
sp|Q8WUK0|PTPM1_HUMAN	PTPMT1	PTPM1_HUMAN Phosphatidylglycerophosphatase and protein-tyrosine phosphatase 1	1	10.6319	10.2995	11.6749	10.8688	10.0926	11.5364	10.7906	10.8065	0.994276	0.920797	-0.00828162	0.0358362										ZNF355P
sp|Q5H9R7-5|PP6R3_HUMAN	PPP6R3	PP6R3_HUMAN Isoform 5 of Serine/threonine-protein phosphatase 6 regulatory subunit 3	3	196.308	153.52	167.435	172.421	174.337	186.681	152.936	171.318	0.993601	0.948326	-0.009262	0.0230426										ZNF182
sp|Q13356-2|PPIL2_HUMAN	PPIL2	PPIL2_HUMAN Isoform 2 of Peptidyl-prolyl cis-trans isomerase-like 2	1	19.0805	13.4807	15.7165	16.0925	15.2116	16.9411	15.7973	15.9833	0.993213	0.951995	-0.00982447	0.0213656										ZNF135
sp|P63172|DYLT1_HUMAN	DYNLT1	DYLT1_HUMAN Dynein light chain Tctex-type 1	1	49.2801	37.4412	40.3273	42.3495	39.6905	41.9328	44.5528	42.0587	0.993133	0.943134	-0.00994132	0.0254265							OR10K1			KDM4B
sp|Q14155|ARHG7_HUMAN	ARHGEF7	ARHG7_HUMAN Rho guanine nucleotide exchange factor 7	2	85.0876	70.8571	71.5701	75.8383	80.2943	75.1256	70.5213	75.3137	0.993084	0.927587	-0.0100127	0.0326454		HMOX2		MGAT5		EARS2	CDH6			CDYL	DARS1
sp|Q9NY93|DDX56_HUMAN	DDX56	DDX56_HUMAN Probable ATP-dependent RNA helicase DDX56	6	303.71	304.696	354.009	320.805	332.629	293.038	330.059	318.575	0.993049	0.920395	-0.010063	0.0360259							MTNR1A			HOXB7	TXNDC17
sp|P51970|NDUA8_HUMAN	NDUFA8	NDUA8_HUMAN NADH dehydrogenase [ubiquinone] 1 alpha subcomplex subunit 8	5	306.245	345.474	356.782	336.167	301.51	354.677	344.542	333.576	0.992294	0.913361	-0.0111608	0.0393574										TASOR
sp|Q92604|LGAT1_HUMAN	LPGAT1	LGAT1_HUMAN Acyl-CoA:lysophosphatidylglycerol acyltransferase 1	3	112.519	128.316	145.777	128.871	120.431	130.295	132.775	127.834	0.991951	0.924758	-0.0116599	0.033972							TAS1R3			REXO1
sp|P54289|CA2D1_HUMAN	CACNA2D1	CA2D1_HUMAN Voltage-dependent calcium channel subunit alpha-2/delta-1	13	542.453	610.684	544.486	565.874	583.178	545.103	555.604	561.295	0.991908	0.864252	-0.0117211	0.0633594		SLC37A3				MRPS24	FLVCR2			EAF1	KRT17
sp|Q9HD33|RM47_HUMAN	MRPL47	RM47_HUMAN 39S ribosomal protein L47, mitochondrial	11	566.095	737.03	748.629	683.918	642.588	728.469	664.058	678.372	0.99189	0.935508	-0.0117476	0.0289523							TRPV6			SNRNP48
sp|Q07021|C1QBP_HUMAN	C1QBP	C1QBP_HUMAN Complement component 1 Q subcomponent-binding protein, mitochondrial	21	896.531	1174.05	1080.04	1050.21	1007.27	1033.98	1083.59	1041.61	0.991814	0.923858	-0.0118591	0.0343949		SELENOT				MRPL54	FBXO45			DUX4L4	IRAK4
sp|P52758|UK114_HUMAN	HRSP12	UK114_HUMAN Ribonuclease UK114	1	43.6945	34.6016	39.2204	39.1722	33.4051	41.8103	41.208	38.8078	0.990699	0.927669	-0.0134819	0.0326068							PTGER2			PHF7
sp|P24311|COX7B_HUMAN	COX7B	COX7B_HUMAN Cytochrome c oxidase subunit 7B, mitochondrial	2	786.998	732.788	790.373	770.053	661.821	780.141	846.314	762.759	0.990528	0.904514	-0.0137305	0.0435846						SUCLG2	KCTD12			H2AC7	RRM2
sp|P10109|ADX_HUMAN	FDX1	ADX_HUMAN Adrenodoxin, mitochondrial	4	240.485	298.733	264.716	267.978	258.99	269.219	268.01	265.406	0.990403	0.888374	-0.0139121	0.0514044							OR51A7			MLH3
sp|Q13823|NOG2_HUMAN	GNL2	NOG2_HUMAN Nucleolar GTP-binding protein 2	4	157.557	161.171	189.151	169.293	194.344	144.153	164.498	167.665	0.990384	0.931011	-0.0139403	0.0310451							OR8B4			NKX6-1
sp|Q86U28|ISCA2_HUMAN	ISCA2	ISCA2_HUMAN Iron-sulfur cluster assembly 2 homolog, mitochondrial	3	52.9594	70.6821	57.1513	60.2643	62.4057	56.9921	59.6521	59.6833	0.99036	0.921967	-0.0139757	0.0352846							SLC12A9			POU3F2
sp|Q99733|NP1L4_HUMAN	NAP1L4	NP1L4_HUMAN Nucleosome assembly protein 1-like 4	5	281.769	179.162	213.911	224.947	218.81	235.621	213.624	222.685	0.989942	0.945063	-0.0145837	0.0245393										SUPT7L
sp|Q9UH62|ARMX3_HUMAN	ARMCX3	ARMX3_HUMAN Armadillo repeat-containing X-linked protein 3	7	258.215	289.896	272.958	273.689	259.295	269.586	283.545	270.809	0.989474	0.81515	-0.0152663	0.0887623		INSIG1		PCSK7		FAM162A	CELSR3			CENPO	DNAAF3
sp|Q14203|DCTN1_HUMAN	DCTN1	DCTN1_HUMAN Dynactin subunit 1	13	566.298	468.576	453.913	496.262	471.453	525.796	475.691	490.98	0.989356	0.899709	-0.0154381	0.0458979							MDGA2			HNRNPCL4	TNFAIP8
sp|P48723|HSP13_HUMAN	HSPA13	HSP13_HUMAN Heat shock 70 kDa protein 13	10	297.261	396.1	346.857	346.739	385.85	273.675	369.597	343.041	0.989333	0.938655	-0.0154714	0.0274938							RASD2			PITX3
sp|Q7Z4R8|CF120_HUMAN	C6orf120	CF120_HUMAN UPF0669 protein C6orf120	2	27.896	35.8536	33.9595	32.5697	31.307	30.5673	34.7732	32.2158	0.989136	0.90305	-0.0157594	0.0442884		SGPP2				MRPS14	FCRL1			DXO	KANK4
sp|Q99623|PHB2_HUMAN	PHB2	PHB2_HUMAN Prohibitin-2	41	1792.41	2190.34	2061.71	2014.82	1941.56	2055.51	1981.72	1992.93	0.989135	0.866209	-0.0157604	0.0623771										ZBTB37
sp|Q9BQQ3|GORS1_HUMAN	GORASP1	GORS1_HUMAN Golgi reassembly-stacking protein 1	5	194.559	179.253	189.283	187.698	192.924	186.628	177.382	185.645	0.989058	0.763141	-0.0158724	0.117395							OR8U1			NOM1
sp|Q9Y5W7|SNX14_HUMAN	SNX14	SNX14_HUMAN Sorting nexin-14	1	39.0477	39.0742	45.79	41.3039	41.2724	39.4381	41.8187	40.8431	0.988842	0.854431	-0.016188	0.0683231
sp|Q6UWU4-2|CF089_HUMAN	C6orf89	CF089_HUMAN Isoform 2 of Bombesin receptor-activated protein C6orf89	2	135.855	163.924	158.268	152.682	153.477	146.882	152.534	150.964	0.988748	0.854962	-0.0163259	0.0680532		SHISA3				MRPS16	FCRL3			DYRK1B	KCNAB3
sp|P26640|SYVC_HUMAN	VARS	SYVC_HUMAN Valine--tRNA ligase	9	312.081	239.61	265.733	272.475	292.5	267.728	247.421	269.216	0.988042	0.90212	-0.0173563	0.0447357
sp|O75683|SURF6_HUMAN	SURF6	SURF6_HUMAN Surfeit locus protein 6	7	165.594	187.983	233.341	195.639	209.452	170.72	199.715	193.296	0.988022	0.923999	-0.0173844	0.0343285
tr|H0YBE0|H0YBE0_HUMAN	MTDH	H0YBE0_HUMAN Protein LYRIC (Fragment)	2	87.4994	121.999	112.025	107.175	110.599	99.3807	107.561	105.847	0.987611	0.907947	-0.0179846	0.0419394										SPOPL
sp|Q9H5Q4|TFB2M_HUMAN	TFB2M	TFB2M_HUMAN Dimethyladenosine transferase 2, mitochondrial	8	352.278	475.964	490.423	439.555	430.629	452.977	418.264	433.957	0.987264	0.906994	-0.0184923	0.0423955
sp|P26641|EF1G_HUMAN	EEF1G	EF1G_HUMAN Elongation factor 1-gamma	22	2101.77	1550.01	1712.91	1788.23	1805.58	1847.35	1642.59	1765.17	0.987109	0.901662	-0.0187193	0.0449564							OR13C2			KLF2
sp|Q8N983|RM43_HUMAN	MRPL43	RM43_HUMAN 39S ribosomal protein L43, mitochondrial	8	360.583	454.821	435.561	416.988	393.362	429.952	411.405	411.573	0.987015	0.86825	-0.0188567	0.0613554							TRPM1			SNRNP200
sp|Q29RF7|PDS5A_HUMAN	PDS5A	PDS5A_HUMAN Sister chromatid cohesion protein PDS5 homolog A	5	268.576	208.804	220.788	232.723	213.056	242.273	233.745	229.691	0.986974	0.888048	-0.0189154	0.0515636										XRN2
sp|Q8IVF2|AHNK2_HUMAN	AHNAK2	AHNK2_HUMAN Protein AHNAK2	110	5823.2	4725.13	4572.78	5040.37	5590.45	5081.79	4249.64	4973.96	0.986825	0.910506	-0.0191335	0.0407174		CYP51A1		FUT11	MAN2B1	CA5A	BEST1	SNX27		BATF2	BCAS4
sp|Q8IXT5|RB12B_HUMAN	RBM12B	RB12B_HUMAN RNA-binding protein 12B	3	45.105	109.043	75.9052	76.6844	93.7112	65.928	67.3679	75.669	0.986759	0.962966	-0.0192296	0.0163891										ZNF557
sp|Q96GE9|TM261_HUMAN	TMEM261	TM261_HUMAN Transmembrane protein 261	3	148.146	124.252	145.083	139.16	116.405	125.404	169.79	137.2	0.985909	0.919071	-0.0204734	0.036651
sp|P36551|HEM6_HUMAN	CPOX	HEM6_HUMAN Coproporphyrinogen-III oxidase, mitochondrial	12	495.019	699.439	591.226	595.228	650.652	494.599	615.193	586.815	0.985865	0.916759	-0.0205379	0.0377447						TAMM41	KIR2DL3			H2AZ1	SAMD9
sp|Q7KZF4|SND1_HUMAN	SND1	SND1_HUMAN Staphylococcal nuclease domain-containing protein 1	8	319.838	220.804	286.154	275.598	250.851	284.394	279.82	271.688	0.985812	0.90544	-0.0206154	0.0431403
sp|Q9Y5S9|RBM8A_HUMAN	RBM8A	RBM8A_HUMAN RNA-binding protein 8A	5	309.434	391.806	415.138	372.126	396.136	333.41	370.543	366.696	0.985409	0.890054	-0.0212048	0.0505834										ZNF570
sp|Q14165|MLEC_HUMAN	MLEC	MLEC_HUMAN Malectin	18	1272.41	1484.27	1505.23	1420.64	1472.8	1238.64	1487.96	1399.8	0.985333	0.858642	-0.0213174	0.0661879							TRBV11-3			SF3A2
sp|O15061|SYNEM_HUMAN	SYNM	SYNEM_HUMAN Synemin	3	87.2479	86.1235	92.091	88.4874	96.7262	71.4252	93.3661	87.1725	0.98514	0.879522	-0.0215998	0.0557532
sp|Q14683|SMC1A_HUMAN	SMC1A	SMC1A_HUMAN Structural maintenance of chromosomes protein 1A	21	955.267	850.083	962.281	922.543	895.829	925.059	904.52	908.469	0.984744	0.725148	-0.0221793	0.139573
sp|Q13190|STX5_HUMAN	STX5	STX5_HUMAN Syntaxin-5	6	230.395	224.445	229.438	228.093	224.939	231.737	216.97	224.549	0.984462	0.488332	-0.0225921	0.311285
sp|Q9Y3A2|UTP11_HUMAN	UTP11L	UTP11_HUMAN Probable U3 small nucleolar RNA-associated protein 11	6	377.511	381.188	405.395	388.031	414.136	335.601	396.093	381.943	0.984311	0.821739	-0.0228134	0.0852658
sp|Q99442|SEC62_HUMAN	SEC62	SEC62_HUMAN Translocation protein SEC62	7	452.815	564.408	549.764	522.329	534.998	469.292	538.05	514.113	0.984271	0.853006	-0.0228721	0.069048										ZSCAN4
sp|O14662|STX16_HUMAN	STX16	STX16_HUMAN Syntaxin-16	5	290.833	304.134	349.774	314.914	308.224	323.403	297.971	309.866	0.98397	0.806735	-0.0233141	0.0932694
sp|Q9H061|T126A_HUMAN	TMEM126A	T126A_HUMAN Transmembrane protein 126A	6	316.944	378.423	349.931	348.432	312.681	341.828	373.818	342.776	0.983766	0.832384	-0.0236132	0.0796765
sp|Q9NVA1|UQCC1_HUMAN	UQCC1	UQCC1_HUMAN Ubiquinol-cytochrome-c reductase complex assembly factor 1	2	82.7501	91.2945	89.9896	88.0114	74.5338	97.2053	87.8977	86.5456	0.983345	0.846434	-0.0242301	0.072407
sp|Q03252|LMNB2_HUMAN	LMNB2	LMNB2_HUMAN Lamin-B2	21	1296.26	1283.32	1200.17	1259.92	1191.98	1274.52	1250.24	1238.92	0.983332	0.617148	-0.0242498	0.20961							TAAR3P			RCL1
sp|P27824|CALX_HUMAN	CANX	CALX_HUMAN Calnexin	82	4447	5856.18	5437.6	5246.93	5269.69	4825.97	5381.19	5158.95	0.983233	0.854821	-0.0243949	0.068125		SPTSSB				MRRF	FZD4			EGR2	LDHC
sp|O43808|PM34_HUMAN	SLC25A17	PM34_HUMAN Peroxisomal membrane protein PMP34	1	52.9404	57.1678	58.9578	56.3554	49.7719	57.461	58.9604	55.3978	0.983008	0.789729	-0.0247249	0.102522
sp|Q9HAV4|XPO5_HUMAN	XPO5	XPO5_HUMAN Exportin-5	3	156.932	146.185	136.401	146.506	131.602	161.06	139.384	144.015	0.983	0.82613	-0.024737	0.0829517
sp|P22830-2|HEMH_HUMAN	FECH	HEMH_HUMAN Isoform 2 of Ferrochelatase, mitochondrial	8	333.068	433.416	406.549	391.011	377.144	343.33	432.551	384.342	0.982943	0.874729	-0.0248199	0.0581264							OR51B5			MLLT3
sp|P13674|P4HA1_HUMAN	P4HA1	P4HA1_HUMAN Prolyl 4-hydroxylase subunit alpha-1	24	1110.46	1534.24	1328.22	1324.31	1309.49	1189.55	1406.12	1301.72	0.982942	0.877425	-0.0248223	0.0567901										UBTF
sp|Q15120-2|PDK3_HUMAN	PDK3	PDK3_HUMAN Isoform 2 of [Pyruvate dehydrogenase (acetyl-transferring)] kinase isozyme 3, mitochondrial	1	13.9508	17.3949	18.3976	16.5811	15.4019	16.6413	16.849	16.2974	0.98289	0.851426	-0.0248985	0.069853										XAB2
sp|P00367|DHE3_HUMAN	GLUD1	DHE3_HUMAN Glutamate dehydrogenase 1, mitochondrial	47	2226.93	2831.44	2633.63	2564	2533.91	2283.71	2741.07	2519.56	0.98267	0.850918	-0.0252216	0.0701121							OR7A10			NIP7
sp|P55010|IF5_HUMAN	EIF5	IF5_HUMAN Eukaryotic translation initiation factor 5	1	29.613	18.2678	21.0451	22.9753	24.1944	23.4171	20.1111	22.5742	0.982542	0.917486	-0.0254091	0.0374005							OR1M1			LHX5
sp|Q9Y375|CIA30_HUMAN	NDUFAF1	CIA30_HUMAN Complex I intermediate-associated protein 30, mitochondrial	8	321.149	372.887	366.116	353.384	351.952	320.904	368.71	347.189	0.982469	0.786983	-0.0255165	0.104034										TATDN3
sp|Q9H9J2|RM44_HUMAN	MRPL44	RM44_HUMAN 39S ribosomal protein L44, mitochondrial	10	411.352	515.953	540.385	489.23	457.631	499.042	485.162	480.612	0.982383	0.845262	-0.0256424	0.0730087							TRPM6			SNRNP27
sp|P16435|NCPR_HUMAN	POR	NCPR_HUMAN NADPH--cytochrome P450 reductase	27	1491.04	1611.58	1646.36	1583	1514.52	1478.53	1672.01	1555.02	0.982327	0.730751	-0.0257241	0.136231										ZNF10
sp|P22033|MUTA_HUMAN	MUT	MUTA_HUMAN Methylmalonyl-CoA mutase, mitochondrial	17	727.43	931.222	966.995	875.216	844.398	829.442	903.753	859.198	0.981698	0.847291	-0.0266486	0.0719675										SSBP4
sp|Q9BYC9|RM20_HUMAN	MRPL20	RM20_HUMAN 39S ribosomal protein L20, mitochondrial	3	223.112	289.762	320.163	277.679	254.469	286.115	277.072	272.552	0.981536	0.873291	-0.0268867	0.0588412							TRDV1			SMARCD1
sp|Q02487|DSC2_HUMAN	DSC2	DSC2_HUMAN Desmocollin-2	3	66.8178	78.8311	66.078	70.5757	58.3027	81.4347	68.0657	69.2677	0.981467	0.876163	-0.0269879	0.0574149							OR10G6			KANSL2
sp|O43837|IDH3B_HUMAN	IDH3B	IDH3B_HUMAN Isocitrate dehydrogenase [NAD] subunit beta, mitochondrial	23	1433.96	1918.72	1754.26	1702.32	1670.25	1650.9	1689.77	1670.31	0.981197	0.833585	-0.0273859	0.0790502							RXFP2			POLDIP2
sp|Q5SRE5|NU188_HUMAN	NUP188	NU188_HUMAN Nucleoporin NUP188 homolog	2	43.5255	40.0894	38.0016	40.5388	36.8645	45.8467	36.611	39.7741	0.981136	0.834856	-0.0274757	0.0783887										TRA2B
sp|P78406|RAE1L_HUMAN	RAE1	RAE1L_HUMAN mRNA export factor	5	153.079	126.097	120.502	133.226	136.302	132.653	122.752	130.569	0.980055	0.818436	-0.0290649	0.0870152										ZNF519
sp|Q8TCS8|PNPT1_HUMAN	PNPT1	PNPT1_HUMAN Polyribonucleotide nucleotidyltransferase 1, mitochondrial	34	1824.9	2168.67	2135.16	2042.91	1915.27	1939.67	2151.32	2002.09	0.980018	0.773614	-0.0291204	0.111476										ZIM2
sp|P36507|MP2K2_HUMAN	MAP2K2	MP2K2_HUMAN Dual specificity mitogen-activated protein kinase kinase 2	6	507.742	432.766	372.044	437.517	435.189	445.045	405.541	428.592	0.979599	0.838319	-0.0297366	0.0765906							TNFRSF14			RPP25
sp|Q7Z7K0|COXM1_HUMAN	CMC1	COXM1_HUMAN COX assembly mitochondrial protein homolog	1	15.7899	18.1445	19.7413	17.8919	15.2258	19.3028	18.0487	17.5258	0.979538	0.83668	-0.0298268	0.0774408						SDHAF4	HTR6			GATA6	PPIAL4C
sp|Q6P1J9|CDC73_HUMAN	CDC73	CDC73_HUMAN Parafibromin	1	19.5505	13.8394	18.4717	17.2872	16.813	18.6014	15.385	16.9331	0.979517	0.866999	-0.029857	0.0619812		UPK3A				NMNAT3	GPR174			FAM50A	NLRC5
sp|Q9H3H1|MOD5_HUMAN	TRIT1	MOD5_HUMAN tRNA dimethylallyltransferase, mitochondrial	1	38.1408	45.8145	43.0479	42.3344	37.7837	40.7666	45.8367	41.4624	0.979401	0.801697	-0.0300281	0.0959896
sp|Q5BJD5|TM41B_HUMAN	TMEM41B	TM41B_HUMAN Transmembrane protein 41B	1	61.9826	78.4732	70.1689	70.2082	68.7638	68.821	68.6556	68.7468	0.979185	0.774182	-0.0303471	0.111157
sp|P51858|HDGF_HUMAN	HDGF	HDGF_HUMAN Hepatoma-derived growth factor	3	115.672	75.6177	66.8056	86.0319	90.404	83.1648	79.135	84.2346	0.979109	0.912683	-0.030459	0.03968							PCDHB5			ORC3
sp|O60888-2|CUTA_HUMAN	CUTA	CUTA_HUMAN Isoform A of Protein CutA	2	39.5508	34.946	33.8127	36.1032	33.652	38.6846	33.6944	35.3437	0.978963	0.769563	-0.0306741	0.113756						UCP1	LRRC55			HIST2H2AC	ST13
sp|P17655|CAN2_HUMAN	CAPN2	CAN2_HUMAN Calpain-2 catalytic subunit	14	739.514	561.835	545.935	615.761	645.596	629.903	532.917	602.806	0.97896	0.864749	-0.0306786	0.0631099		SRPRB				MT-CO2	GABRA6			EID2	LRCH3
sp|P51116|FXR2_HUMAN	FXR2	FXR2_HUMAN Fragile X mental retardation syndrome-related protein 2	1	35.4518	32.2239	32.99	33.5552	31.8053	33.6077	33.1225	32.8451	0.978839	0.558082	-0.0308569	0.253302							OR5AC1			MYOZ1
sp|O00273|DFFA_HUMAN	DFFA	DFFA_HUMAN DNA fragmentation factor subunit alpha	1	40.7726	30.029	25.4551	32.0856	33.8329	35.8872	24.4828	31.401	0.978663	0.910785	-0.0311154	0.0405842							NAE1			HOXC5	UBE4A
sp|Q9NP72|RAB18_HUMAN	RAB18	RAB18_HUMAN Ras-related protein Rab-18	7	666.141	645.164	584.39	631.898	608.995	622.381	623.126	618.167	0.97827	0.611241	-0.0316947	0.213787										ZNF461
sp|Q96CU9|FXRD1_HUMAN	FOXRED1	FXRD1_HUMAN FAD-dependent oxidoreductase domain-containing protein 1	7	375.494	412.793	391.66	393.315	377.842	392.545	383.388	384.591	0.977819	0.494498	-0.0323601	0.305835							OR52L1			MUSTN1
sp|Q9BV79|MECR_HUMAN	MECR	MECR_HUMAN Trans-2-enoyl-CoA reductase, mitochondrial	4	154.845	181.646	176.268	170.92	166.996	174.404	159.945	167.115	0.97774	0.700064	-0.0324779	0.154862							TRAV39			SAP30L
sp|Q13573|SNW1_HUMAN	SNW1	SNW1_HUMAN SNW domain-containing protein 1	8	351.464	412.024	403.939	389.143	426.822	335.331	379.142	380.432	0.977615	0.802124	-0.0326612	0.0957587
sp|O60783|RT14_HUMAN	MRPS14	RT14_HUMAN 28S ribosomal protein S14, mitochondrial	1	31.102	35.4372	41.2719	35.937	33.0601	37.8392	34.4885	35.1293	0.977523	0.817003	-0.032798	0.0877765							UBL3			SON
sp|Q0JRZ9|FCHO2_HUMAN	FCHO2	FCHO2_HUMAN FCH domain only protein 2	1	15.4888	15.712	15.9537	15.7182	16.3849	15.7583	13.9485	15.3639	0.977462	0.658264	-0.0328873	0.1816							OR4X2			MKI67
sp|Q8IZA0|K319L_HUMAN	KIAA0319L	K319L_HUMAN Dyslexia-associated protein KIAA0319-like protein	5	198.974	215.511	211.556	208.68	204.652	206.778	200.418	203.949	0.97733	0.424487	-0.0330823	0.372136							SLC2A13			PRPF31
sp|Q16181|SEPT7_HUMAN	SEPT7	SEPT7_HUMAN Septin-7	11	662.182	460.409	503.585	542.059	500.248	567.69	521.339	529.759	0.977309	0.858041	-0.0331129	0.0664921
sp|Q9UP95|S12A4_HUMAN	SLC12A4	S12A4_HUMAN Solute carrier family 12 member 4	10	498.682	528.538	449.511	492.244	501.167	425.888	516.021	481.026	0.97721	0.772013	-0.0332593	0.112375
sp|O00429-6|DNM1L_HUMAN	DNM1L	DNM1L_HUMAN Isoform 6 of Dynamin-1-like protein	15	688.604	597.441	519.438	601.828	576.029	629.196	557.82	587.682	0.976495	0.804055	-0.0343158	0.0947145							OPN1MW			IRX2
sp|Q9Y5Z9|UBIA1_HUMAN	UBIAD1	UBIA1_HUMAN UbiA prenyltransferase domain-containing protein 1	2	56.5595	51.3578	51.4088	53.1087	52.0452	52.8339	50.6986	51.8592	0.976473	0.533217	-0.034348	0.273096
sp|Q2TAA5|ALG11_HUMAN	ALG11	ALG11_HUMAN GDP-Man:Man(3)GlcNAc(2)-PP-Dol alpha-1,2-mannosyltransferase	2	56.9388	60.9646	61.0434	59.6489	60.8509	57.0528	56.8304	58.2447	0.976459	0.496882	-0.0343691	0.303747		EDEM1		GCC1	SGSH	COQ2	CAP2	VPS4B		BRF2	CARD17
sp|Q9Y3D9|RT23_HUMAN	MRPS23	RT23_HUMAN 28S ribosomal protein S23, mitochondrial	12	581.323	816.215	771.594	723.044	706.816	669.299	741.725	705.947	0.976354	0.830849	-0.0345234	0.080478							VIPR1			SOX21
sp|P41247|PLPL4_HUMAN	PNPLA4	PLPL4_HUMAN Patatin-like phospholipase domain-containing protein 4	1	66.5503	87.9356	91.0869	81.8576	68.4205	90.4689	80.8562	79.9152	0.97627	0.855548	-0.0346474	0.0677554										ZHX3
sp|Q9BYX2|TBD2A_HUMAN	TBC1D2	TBD2A_HUMAN TBC1 domain family member 2A	2	107.408	87.0929	85.0365	93.1791	94.3917	95.9756	82.5169	90.9614	0.9762	0.80269	-0.0347515	0.0954519
sp|P07099|HYEP_HUMAN	EPHX1	HYEP_HUMAN Epoxide hydrolase 1	24	1387.15	1379.96	1455.06	1407.39	1311.59	1439.2	1370.36	1373.72	0.976073	0.486359	-0.0349384	0.313043							OR2G3			MACROD1
[truncated: 1,850 more rows]

## Sheet: LysoIP-TMEM192 3xHA-Neg.Control
CONTROL_1	CONTROL_2	CONTROL_3	TMEM192_1	TMEM192_2	TMEM192_3	Number of peptides	Welch's T-test Difference TMEM192_CONTROL	-Log Welch's T-test p-value TMEM192_CONTROL	Welch's T-test q-value TMEM192_CONTROL	Welch's T-test Test statistic TMEM192_CONTROL	Protein Id	Gene Symbol (3109)	Description	ER (175)	ERGIC (24)	Golgi apparatus (87)	Lysosome (119)	Mitochondria (410)	Plasma Membrane (107)	Endosome (67)	Peroxisome (21)	Nucleus (301)	Cytoplasm (128)	AUTOPHAGY (26)	mTOR/AMPK (28)
0.000270331	0.0460395	-0.0478368	3.2141	3.27456	3.30185	40	3.26401	6.96925	0	3.14601	sp|P04062|GLCM_HUMAN	GBA	GLCM_HUMAN Glucosylceramidase	#N/A	#N/A	#N/A	GBA	#N/A	#N/A	#N/A	#N/A	#N/A	#N/A	#N/A	#N/A
-0.037661	0.0382102	-0.00154773	2.45755	2.53401	2.52877	6	2.50711	6.66839	0	2.42704	sp|P15260|INGR1_HUMAN	IFNGR1	INGR1_HUMAN Interferon gamma receptor 1	#N/A	#N/A	#N/A	#N/A	#N/A	IFNGR1	#N/A	#N/A	#N/A	#N/A	#N/A	#N/A
[truncated: 3,107 more rows]
