# Supplementary material for: Quantitative proteomics reveals the selectivity of ubiquitin-binding autophagy receptors in the turnover of damaged lysosomes by lysophagy
Source: eLife. 2021 Sep 29;10:e72328. doi: 10.7554/eLife.72328 (PMC8523161; doi:10.7554/eLife.72328)
Supplement: Supplementary file 2. — See Supplementary file 6 for details. [file elife-72328-supp2.xlsx]

## Sheet: Experiment info
									Category	Setting
									mass spectrometer	Orbitrap Fusion
									quantification mode	SPS-MS3
									LC
									Model	nLC-1000
									Column	Accucore150 resin (2.6 μm, 150 Å)
									Flow rate	476 nL/min
									Gradient	7–22%
									Method length	150 min
									FAIMS
									CVs	none
									Mono. Peak assignment	yes
									MS1
									Detector	Orbitrap
									Resolution at 200Th	120000
									Mass range	350-1400
									AGC target	400000
									Max. ion time	50
									Dynamic Exclusion	7ppm, 120 ms
									MS2
									No. Dependnet Scans	10
									Detector	ion trap
									Scan rate	turbo
									Collision Energy	CID, 35%
									AGC target	10000
									Max. ion time	60 ms
									isolaton window	0.7
									MS3
									No. SPS ions	10
									Detector	Orbitrap
									Resolution	50000
									Collision Energy	HCD 65
									AGC target	150K
									Max. ion time	150ms

## Sheet: LysoIP-Untreated-GPN-timecourse
Protein Id	Gene Symbol (3417)	Description	Number of peptides	Control	Control	Control avg	GPN_22.5min	GPN_22.5min	GPN_22.5min avg	GPN_22.5min/Control	log2 GPN_22.5min/Control	GPN_45min	GPN_45min	GPN_45min avg	GPN_45min/Control	log2 GPN_45min/Control	GPN_90min	GPN_90min	GPN_90min avg	GPN_90min/Control	log2 GPN_90min/Control	GPN_180min	GPN_180min	GPN_180min avg	GPN_180min/Control	log2 GPN_180min/Control	ER (181)	ERGIC (23)	Golgi apparatus (95)	Lysosome (130)	Mitochondria (358)	Plasma Membrane (103)	Endosome (88)	Peroxisome (16)	Nucleus (297)	Cytoplasm (168)	AUTOPHAGY (35)	mTOR/AMPK (32)	ESCRT (24)		ER (551)	ERGIC (42)	Golgi (357)	Lysosome (179)	Mitochondria (803)	Plasma Membrane (1976)	Endosome (166)	Peroxisome (63)	Nucleus (2975)
sp|Q99758|ABCA3_HUMAN	ABCA3	ABCA3_HUMAN ATP-binding cassette sub-family A member 3	49	9282.3	9765.9	9524.1	7302.39	7227.24	7264.82	0.762782	-0.390657	8177.62	6896.47	7537.05	0.791366	-0.337584	7436.09	8561.39	7998.74	0.839842	-0.25181	7073.51	8539.69	7806.6	0.819668	-0.286888	#N/A	#N/A	#N/A	ABCA3	#N/A	#N/A	#N/A	#N/A	#N/A	#N/A	#N/A	#N/A	#N/A		AADAC	ATP6AP1	A3GALT2	ABCA3	AADAT	AAK1	ABHD17C	ABCD2	AATF
sp|Q9NP78|ABCB9_HUMAN	ABCB9	ABCB9_HUMAN ATP-binding cassette sub-family B member 9	1	74.5663	64.3818	69.4741	57.2104	52.2149	54.7126	0.787526	-0.3446	62.8283	51.2695	57.0489	0.821154	-0.284275	70.601	66.9057	68.7533	0.989626	-0.0150442	52.4166	64.9149	58.6658	0.844427	-0.243956	#N/A	#N/A	#N/A	ABCB9	#N/A	#N/A	#N/A	#N/A	#N/A	#N/A	#N/A	#N/A	#N/A		ABCA4	BCAP31	A4GALT	ABCB9	AARS2	ABCA8	ACAP1	ABCD3	ABITRAM
sp|P11117|PPAL_HUMAN	ACP2	PPAL_HUMAN Lysosomal acid phosphatase	36	12395.9	14254.5	13325.2	10228.8	10754.1	10491.5	0.787339	-0.344943	11368.9	9122.91	10245.9	0.768912	-0.37911	10777.7	12202.9	11490.3	0.862299	-0.213741	10705.9	11476.7	11091.3	0.832355	-0.264729	#N/A	#N/A	#N/A	ACP2	#N/A	#N/A	#N/A	#N/A	#N/A	#N/A	#N/A	#N/A	#N/A		ABHD12	CNIH4	A4GNT	ACP2	AASS	ABCB1	ACAP2	ABCD4	ABRAXAS1
sp|P20933|ASPG_HUMAN	AGA	ASPG_HUMAN N(4)-(beta-N-acetylglucosaminyl)-L-asparaginase	24	5288.9	5597.7	5443.3	3452.38	3612.35	3532.36	0.648938	-0.623847	4215.67	3645.11	3930.39	0.72206	-0.469809	4405.45	4647.35	4526.4	0.831554	-0.266117	3834.83	4632.48	4233.65	0.777774	-0.362578	#N/A	#N/A	#N/A	AGA	#N/A	#N/A	#N/A	#N/A	#N/A	#N/A	#N/A	#N/A	#N/A		ACER1	COPZ2	ABO	ACP5	ABAT	ABCB5	AMOTL2	ACAA1	ABT1
sp|Q96BM9|ARL8A_HUMAN	ARL8A	ARL8A_HUMAN ADP-ribosylation factor-like protein 8A	11	3502.27	3173.56	3337.91	2807.65	2924.61	2866.13	0.858659	-0.219843	2981.22	2574.39	2777.8	0.832198	-0.265002	2532.49	2852.73	2692.61	0.806674	-0.309942	2265.89	2065.24	2165.56	0.648778	-0.624204	#N/A	#N/A	#N/A	ARL8A	#N/A	#N/A	#N/A	#N/A	#N/A	#N/A	#N/A	#N/A	#N/A		AGMO	DDHD2	ACER2	AGA	ABCB10	ABCC1	ANKFY1	ACBD5	ACD
sp|Q9NVJ2|ARL8B_HUMAN	ARL8B	ARL8B_HUMAN ADP-ribosylation factor-like protein 8B	52	18023.9	23997	21010.5	15094	15788.2	15441.1	0.734925	-0.444332	15067	12579.2	13823.1	0.657915	-0.604026	13243.6	14689.4	13966.5	0.664741	-0.589137	11785.8	28476.2	20131	0.958142	-0.0616882	#N/A	#N/A	#N/A	ARL8B	#N/A	#N/A	#N/A	#N/A	#N/A	#N/A	#N/A	#N/A	#N/A		AGPAT1	ECPAS	AP4B1	ARL8A	ABCB7	ABCC10	ANKRD27	ACOT4	ACIN1
sp|P15289|ARSA_HUMAN	ARSA	ARSA_HUMAN Arylsulfatase A	31	5154.94	5875.37	5515.15	4094.22	3841.63	3967.93	0.719458	-0.475017	4013.99	3542.23	3778.11	0.685041	-0.545737	4487.62	4648.44	4568.03	0.828269	-0.271829	4127.69	5372.23	4749.96	0.861256	-0.215486	#N/A	#N/A	#N/A	ARSA	#N/A	#N/A	#N/A	#N/A	#N/A	#N/A	#N/A	#N/A	#N/A		AGPAT2	ERGIC1	AP4E1	ARL8B	ABCB8	ABCC2	ANKRD50	ACOT8	ACTL6A
sp|P15848|ARSB_HUMAN	ARSB	ARSB_HUMAN Arylsulfatase B	28	15248	15852.2	15550.1	9665.43	9924.01	9794.72	0.629881	-0.666848	12068.9	9854.21	10961.6	0.704919	-0.504471	11529.3	13057.3	12293.3	0.790561	-0.339052	11332.8	12971.8	12152.3	0.781493	-0.355694	#N/A	#N/A	#N/A	ARSB	#N/A	#N/A	#N/A	#N/A	#N/A	#N/A	#N/A	#N/A	#N/A		AGPAT4	ERGIC2	AP4M1	ARSA	ABHD10	ABCC8	AVL9	ACOX1	ACTL6B
sp|Q13510-2|ASAH1_HUMAN	ASAH1	ASAH1_HUMAN Isoform 2 of Acid ceramidase	83	23447.7	28111.8	25779.8	18962.9	18355.8	18659.3	0.723799	-0.46634	18683.8	17067.1	17875.4	0.693391	-0.528259	19641.5	20832.7	20237.1	0.785	-0.349236	18483.9	29925.1	24204.5	0.938896	-0.090963	#N/A	#N/A	#N/A	ASAH1	#N/A	#N/A	#N/A	#N/A	#N/A	#N/A	#N/A	#N/A	#N/A		AGR3	ERGIC3	AP4S1	ARSB	ACAA2	ABCG5	CCDC154	ACOX2	ACTR8
sp|Q9NQ11|AT132_HUMAN	ATP13A2	AT132_HUMAN Probable cation-transporting ATPase 13A2	13	2821.05	3220.1	3020.57	2261.85	2421.73	2341.79	0.77528	-0.367212	2600.54	2194.02	2397.28	0.79365	-0.333425	2362.5	2655.76	2509.13	0.83068	-0.267636	2318.01	3242.79	2780.4	0.920487	-0.119531	#N/A	#N/A	#N/A	ATP13A2	#N/A	#N/A	#N/A	#N/A	#N/A	#N/A	#N/A	#N/A	#N/A		ALDH3A2	GBF1	ARF4	ARSD	ACACB	ABCG8	CCDC22	ACOX3	ADAD1
sp|Q93050-3|VPP1_HUMAN	ATP6V0A1	VPP1_HUMAN Isoform 3 of V-type proton ATPase 116 kDa subunit a isoform 1	31	7309.03	8350.86	7829.94	9472.74	8868.16	9170.45	1.1712	0.22799	8395.34	7393.43	7894.39	1.00823	0.0118247	6975.95	7579	7277.48	0.929441	-0.105564	6530.14	8021.04	7275.59	0.929201	-0.105938	#N/A	#N/A	#N/A	ATP6V0A1	#N/A	#N/A	#N/A	#N/A	#N/A	#N/A	#N/A	ATP6V0A1	#N/A		ALG1	GORASP1	ARFIP1	ARSG	ACAD8	ABHD2	CCDC93	AGPS	ADARB1
sp|Q9Y487|VPP2_HUMAN	ATP6V0A2	VPP2_HUMAN V-type proton ATPase 116 kDa subunit a isoform 2	13	3352.5	3764.04	3558.27	3783.15	3731.57	3757.36	1.05595	0.0785434	4087.12	3389.35	3738.23	1.05058	0.0711813	3333.93	3834.71	3584.32	1.00732	0.0105235	3581.05	4874.91	4227.98	1.18821	0.248793	#N/A	#N/A	#N/A	ATP6V0A2	#N/A	#N/A	#N/A	#N/A	#N/A	#N/A	#N/A	ATP6V0A2	#N/A		ALG10	LMAN1	ARFIP2	ASAH1	ACAD9	ACVR1B	CHMP1A	CAT	ADARB2
sp|P27449|VATL_HUMAN	ATP6V0C	VATL_HUMAN V-type proton ATPase 16 kDa proteolipid subunit	2	264.769	270.338	267.553	395.172	311.432	353.302	1.32049	0.401075	306.058	216.091	261.075	0.975784	-0.0353658	262.705	268.043	265.374	0.991854	-0.0118004	265.17	332.235	298.702	1.11642	0.158882	#N/A	#N/A	#N/A	ATP6V0C	#N/A	#N/A	#N/A	#N/A	#N/A	#N/A	#N/A	ATP6V0C	#N/A		ALG11	LMAN1L	ARFRP1	ATP13A2	ACADL	ACVR2B	CHMP1B	CROT	ADIG
sp|P61421|VA0D1_HUMAN	ATP6V0D1	VA0D1_HUMAN V-type proton ATPase subunit d 1	22	9944.86	9427.85	9686.35	10295.4	10093.8	10194.6	1.05247	0.0737794	9372.78	8202.07	8787.42	0.907196	-0.140513	8241.84	9806.83	9024.33	0.931654	-0.102133	8020.9	7475.25	7748.07	0.799896	-0.322116	#N/A	#N/A	#N/A	ATP6V0D1	#N/A	#N/A	#N/A	#N/A	#N/A	#N/A	#N/A	ATP6V0D1	#N/A		ALG12	LMAN2	ARL17A	ATP6V0A1	ACADM	ACVRL1	CHMP2A	DAO	ADIRF
sp|P38606|VATA_HUMAN	ATP6V1A	VATA_HUMAN V-type proton ATPase catalytic subunit A	103	28024.1	27908.7	27966.4	36280.9	35203.4	35742.2	1.27804	0.353932	26936.9	25524.4	26230.7	0.937934	-0.092441	19618.8	22842	21230.4	0.75914	-0.397563	21903.9	23089.2	22496.6	0.804414	-0.313991	#N/A	#N/A	#N/A	ATP6V1A	#N/A	#N/A	#N/A	#N/A	#N/A	#N/A	#N/A	ATP6V1A	#N/A		ALG3	MCFD2	ARSE	ATP6V0A2	ACADS	ADAM22	CHMP2B	DDO	ADNP
sp|P21281|VATB2_HUMAN	ATP6V1B2	VATB2_HUMAN V-type proton ATPase subunit B, brain isoform	63	15578.9	15912.5	15745.7	19793	18867.9	19330.5	1.22767	0.295917	14518.6	13291.6	13905.1	0.883105	-0.179344	10769.9	12839.9	11804.9	0.749722	-0.415572	11242.9	12257.3	11750.1	0.746242	-0.422285	#N/A	#N/A	#N/A	ATP6V1B2	#N/A	#N/A	#N/A	#N/A	#N/A	#N/A	#N/A	ATP6V1B2	#N/A		ALG5	MPPE1	ATP2C1	ATP6V0A4	ACADSB	ADCY5	CHMP4A	DECR2	ADNP2
sp|P21283|VATC1_HUMAN	ATP6V1C1	VATC1_HUMAN V-type proton ATPase subunit C 1	37	12922.1	12362.4	12642.2	17635.6	16938.6	17287.1	1.36741	0.451443	12879.1	11412.5	12145.8	0.960731	-0.0577957	9347.53	11243.8	10295.7	0.814385	-0.296216	10348.2	9443.77	9895.99	0.782771	-0.353338	#N/A	#N/A	#N/A	ATP6V1C1	#N/A	#N/A	#N/A	#N/A	#N/A	#N/A	#N/A	ATP6V1C1	#N/A		ALG6	NAT8	B3GALNT1	ATP6V0B	ACADVL	ADCY6	CHMP6	EHHADH	AEBP2
sp|Q9Y5K8|VATD_HUMAN	ATP6V1D	VATD_HUMAN V-type proton ATPase subunit D	22	4173.89	4067.24	4120.57	5915.34	5587.65	5751.49	1.3958	0.481095	4324.87	3855.54	4090.2	0.992632	-0.010669	3185.6	3887.34	3536.47	0.858249	-0.220532	3505.51	3461.6	3483.56	0.845407	-0.242282	#N/A	#N/A	#N/A	ATP6V1D	#N/A	#N/A	#N/A	#N/A	#N/A	#N/A	#N/A	ATP6V1D	#N/A		ALG8	NAT8B	B3GALNT2	ATP6V0C	ACAT1	ADCY9	CLCN4	EPHX2	AEN
sp|P36543|VATE1_HUMAN	ATP6V1E1	VATE1_HUMAN V-type proton ATPase subunit E 1	58	14652.9	12901.5	13777.2	20852.2	19783.3	20317.8	1.47474	0.560458	14672.1	13218.9	13945.5	1.01222	0.0175169	10707.9	12659	11683.5	0.848028	-0.237816	11776.1	9033.59	10404.8	0.755222	-0.405027	#N/A	#N/A	#N/A	ATP6V1E1	#N/A	#N/A	#N/A	#N/A	#N/A	#N/A	#N/A	ATP6V1E1	#N/A		ALG9	PIEZO1	B3GALT1	ATP6V0D1	ACO2	ADCYAP1R1	CLCN6	FAR1	AFF1
sp|Q16864-2|VATF_HUMAN	ATP6V1F	VATF_HUMAN Isoform 2 of V-type proton ATPase subunit F	9	4528.3	4215.92	4372.11	6614.89	6219.84	6417.36	1.4678	0.553651	4789.65	4307.96	4548.81	1.04041	0.0571579	3303.05	4020.57	3661.81	0.837538	-0.255773	3828.83	2866.62	3347.72	0.7657	-0.385149	#N/A	#N/A	#N/A	ATP6V1F	#N/A	#N/A	#N/A	#N/A	#N/A	#N/A	#N/A	ATP6V1F	#N/A		AMFR	PRRG4	B3GALT2	ATP6V0D2	ACOD1	ADGRA2	DENND10	FAR2	AFF2
sp|O75348|VATG1_HUMAN	ATP6V1G1	VATG1_HUMAN V-type proton ATPase subunit G 1	3	556.373	500.565	528.469	681.283	685.87	683.577	1.2935	0.371284	528.262	465.845	497.053	0.940554	-0.0884177	395.552	436.984	416.268	0.787687	-0.344306	409.429	389.808	399.618	0.756182	-0.403195	#N/A	#N/A	#N/A	ATP6V1G1	#N/A	#N/A	#N/A	#N/A	#N/A	#N/A	#N/A	ATP6V1G1	#N/A		ANKLE2	PTPN2	B3GALT4	ATP6V0E1	ACOT11	ADGRB2	DENND10P1	GNPAT	AFF3
sp|Q9UI12|VATH_HUMAN	ATP6V1H	VATH_HUMAN V-type proton ATPase subunit H	28	8098.74	7744.21	7921.48	10913.9	10279.6	10596.8	1.33772	0.419781	7811.63	7082.94	7447.28	0.940139	-0.0890545	5764.08	6865.31	6314.69	0.797162	-0.327056	6137.5	6362.33	6249.91	0.788984	-0.341933	#N/A	#N/A	#N/A	ATP6V1H	#N/A	#N/A	#N/A	#N/A	#N/A	#N/A	#N/A	ATP6V1H	#N/A		ARL6IP1	RAB2A	B3GALT5	ATP6V0E2	ACOT2	ADGRB3	DENND6A	GSTK1	AFF4
sp|Q96B45|CJ032_HUMAN	C10orf32	CJ032_HUMAN UPF0693 protein C10orf32	13	1589.83	1656.09	1622.96	1067.47	1017.54	1042.51	0.642348	-0.638573	1366.31	1188.67	1277.49	0.787136	-0.345315	1333.59	1422.51	1378.05	0.849097	-0.235999	1202.77	1121.09	1161.93	0.715933	-0.482104	#N/A	#N/A	#N/A	C10orf32	#N/A	#N/A	#N/A	#N/A	#N/A	#N/A	#N/A	#N/A	#N/A		ARMC10	RAB6B	B3GALT6	ATP6V1A	ACOT9	ADGRD1	DENND6B	HACL1	AHNAK
sp|Q96GS4|CQ059_HUMAN	C17orf59	CQ059_HUMAN Uncharacterized protein C17orf59	17	4088.22	4362.1	4225.16	2304.7	2067.16	2185.93	0.51736	-0.950759	2834.75	2442.03	2638.39	0.624447	-0.679348	2858.2	3036.18	2947.19	0.697533	-0.519666	2571.44	3440.55	3005.99	0.711451	-0.491163	#N/A	#N/A	#N/A	C17orf59	#N/A	#N/A	#N/A	#N/A	#N/A	#N/A	#N/A	#N/A	#N/A		ARV1	SEC22B	B3GAT1	ATP6V1B1	ACP6	ADGRE1	DNAJC13	HAO1	AHNAK2
sp|Q96DM3|MIC1_HUMAN	C18orf8	MIC1_HUMAN Uncharacterized protein C18orf8	7	1644.47	1641.88	1643.18	1352.45	1321.23	1336.84	0.813571	-0.297659	1489.34	1284.32	1386.83	0.843994	-0.244695	1363.03	1483.67	1423.35	0.866219	-0.207196	1239.24	1367.07	1303.15	0.793071	-0.334477	#N/A	#N/A	#N/A	C18orf8	#N/A	#N/A	#N/A	#N/A	#N/A	#N/A	#N/A	#N/A	#N/A		ASPH	SLC35C2	B3GAT2	ATP6V1B2	ACSF2	ADGRE2	EEA1	HAO2	AK6
sp|Q8WWB7|NCUG1_HUMAN	C1orf85	NCUG1_HUMAN Lysosomal protein NCU-G1	5	758.651	782.257	770.454	634.625	539.74	587.183	0.762125	-0.3919	678.577	552.768	615.673	0.799104	-0.323546	587.235	690.556	638.896	0.829245	-0.270129	603.779	789.463	696.621	0.904169	-0.145335	#N/A	#N/A	#N/A	C1orf85	#N/A	#N/A	#N/A	#N/A	#N/A	#N/A	#N/A	#N/A	#N/A		ATL1	STX5	B3GAT3	ATP6V1C1	ACSF3	ADGRF5	EHBP1L1	HSD17B4	AKAP17A
sp|P86791|CCZ1_HUMAN	CCZ1	CCZ1_HUMAN Vacuolar fusion protein CCZ1 homolog	8	1025.5	1074.56	1050.03	894.245	880.492	887.369	0.845089	-0.242825	981.36	868	924.68	0.880622	-0.183404	917.474	988.139	952.807	0.907409	-0.140175	846.573	869.555	858.064	0.81718	-0.291273	#N/A	#N/A	#N/A	CCZ1	#N/A	#N/A	#N/A	#N/A	#N/A	#N/A	#N/A	#N/A	#N/A		ATL2	SURF4	B3GNT2	ATP6V1C2	ACSM1	ADGRG2	EHD1	HSDL2	AKIP1
sp|P08962|CD63_HUMAN	CD63	CD63_HUMAN CD63 antigen	13	1732.38	1805.16	1768.77	1741.45	1280.14	1510.8	0.85415	-0.227439	1180.98	1208.91	1194.95	0.67558	-0.565802	1585.01	1576.09	1580.55	0.893587	-0.16232	1275.99	2522.3	1899.14	1.07371	0.102604	#N/A	#N/A	#N/A	CD63	#N/A	#N/A	#N/A	#N/A	#N/A	#N/A	#N/A	#N/A	#N/A		ATL3	TM6SF2	B3GNT3	ATP6V1D	ACSM2A	ADGRG3	EHD2	IDI1	AKIRIN1
sp|P51790-2|CLCN3_HUMAN	CLCN3	CLCN3_HUMAN Isoform 2 of H(+)/Cl(-) exchange transporter 3	10	1929.29	2409.34	2169.32	2047.27	1990.82	2019.05	0.930729	-0.103566	2339.25	1950.19	2144.72	0.988662	-0.0164502	1823.02	2121.72	1972.37	0.909213	-0.137309	1619.75	2426.28	2023.02	0.932559	-0.100733	#N/A	#N/A	#N/A	CLCN3	#N/A	#N/A	#N/A	#N/A	#N/A	#N/A	#N/A	#N/A	#N/A		ATP10B	TMED1	B3GNT4	ATP6V1E1	ACSM2B	ADGRG5	EHD3	IDI2	AKIRIN2
sp|P51790|CLCN3_HUMAN	CLCN3	CLCN3_HUMAN H(+)/Cl(-) exchange transporter 3	2	529.351	584.365	556.858	571.655	580.983	576.319	1.03495	0.0495581	574.934	517.337	546.135	0.980745	-0.0280505	518.601	534.515	526.558	0.945588	-0.080717	454.069	542.013	498.041	0.894377	-0.161045	#N/A	#N/A	#N/A	CLCN3	#N/A	#N/A	#N/A	#N/A	#N/A	#N/A	#N/A	#N/A	#N/A		ATP13A1	TMED10	B3GNT5	ATP6V1E2	ACSM3	ADGRG6	EHD4	LACC1	ALKBH2
sp|P51798|CLCN7_HUMAN	CLCN7	CLCN7_HUMAN H(+)/Cl(-) exchange transporter 7	24	5648.77	5573.54	5611.16	5077.81	4838.3	4958.06	0.883607	-0.178523	5134.33	4285.08	4709.7	0.839347	-0.252661	4679.55	5324.4	5001.98	0.891434	-0.1658	4482.66	4416.73	4449.69	0.793009	-0.334591	#N/A	#N/A	#N/A	CLCN7	#N/A	#N/A	#N/A	#N/A	#N/A	#N/A	#N/A	#N/A	#N/A		ATP2A1	TMED2	B3GNT6	ATP6V1F	ACSM4	ADGRL1	FIG4	LONP2	ALKBH5
sp|Q13286|CLN3_HUMAN	CLN3	CLN3_HUMAN Battenin	4	1724.68	2180.04	1952.36	1418	1353.34	1385.67	0.709741	-0.494635	1543.39	1279.17	1411.28	0.722858	-0.468215	1488.21	1585.29	1536.75	0.787124	-0.345337	1361.49	2055.98	1708.74	0.875215	-0.19229	#N/A	#N/A	#N/A	CLN3	#N/A	#N/A	#N/A	#N/A	#N/A	#N/A	#N/A	#N/A	#N/A		ATP2A2	TMED3	B3GNT7	ATP6V1G1	ACSM5	ADGRL3	FKBP15	MARF1	ALPK3
sp|O75503|CLN5_HUMAN	CLN5	CLN5_HUMAN Ceroid-lipofuscinosis neuronal protein 5	12	4884.36	5234.13	5059.24	3462.28	3422.33	3442.31	0.680399	-0.555547	3688.63	3393.87	3541.25	0.699956	-0.514663	3701.42	3901.88	3801.65	0.751426	-0.412296	3428.74	3767.5	3598.12	0.711197	-0.491679	#N/A	#N/A	#N/A	CLN5	#N/A	#N/A	#N/A	#N/A	#N/A	#N/A	#N/A	#N/A	#N/A		ATP8B3	TMED5	B3GNT8	ATP6V1G2	ACSM6	ADGRL4	FYCO1	MPV17L	ALX1
sp|Q01459|DIAC_HUMAN	CTBS	DIAC_HUMAN Di-N-acetylchitobiase	12	4153.19	4396.57	4274.88	2775.56	2673.01	2724.28	0.637278	-0.650006	2991.71	2656.11	2823.91	0.660582	-0.59819	3224.03	3373.34	3298.69	0.771644	-0.373993	2924.31	3747.05	3335.68	0.780298	-0.357903	#N/A	#N/A	#N/A	CTBS	#N/A	#N/A	#N/A	#N/A	#N/A	#N/A	#N/A	#N/A	#N/A		AUP1	TMED7	B3GNT9	ATP6V1G3	ACSS1	ADGRV1	GRIPAP1	NUDT19	ALX3
sp|O60931-2|CTNS_HUMAN	CTNS	CTNS_HUMAN Isoform 2 of Cystinosin	1	250.138	400.835	325.486	219.865	202.216	211.041	0.648385	-0.625078	279.428	180.439	229.933	0.70643	-0.501381	215.284	269.001	242.142	0.74394	-0.426741	225.426	624.638	425.032	1.30584	0.384974	#N/A	#N/A	#N/A	CTNS	#N/A	#N/A	#N/A	#N/A	#N/A	#N/A	#N/A	#N/A	#N/A		AWAT1	TMED9	B4GALNT1	ATP6V1H	ACSS3	ADIPOR1	HGS	NUDT7	ALX4
sp|P10619|PPGB_HUMAN	CTSA	PPGB_HUMAN Lysosomal protective protein	36	18525.6	25637.2	22081.4	12833.4	12319.6	12576.5	0.569552	-0.812101	14701	12289.9	13495.5	0.611168	-0.710359	14570.9	15464.9	15017.9	0.680115	-0.556149	13447.5	23598.7	18523.1	0.838855	-0.253506	#N/A	#N/A	#N/A	CTSA	#N/A	#N/A	#N/A	#N/A	#N/A	#N/A	#N/A	#N/A	#N/A		AWAT2	TMEM199	B4GALNT2	BORCS8	ADHFE1	ADIPOR2	INPP5F	PAOX	AMMECR1
sp|P07858|CATB_HUMAN	CTSB	CATB_HUMAN Cathepsin B	31	8647.45	8898.67	8773.06	5083.36	4816.59	4949.98	0.564224	-0.825659	5799.53	4839.25	5319.39	0.606332	-0.721819	6390.99	6480.07	6435.53	0.733556	-0.447021	5196.37	7082.29	6139.33	0.699793	-0.514999	#N/A	#N/A	#N/A	CTSB	#N/A	#N/A	#N/A	#N/A	#N/A	#N/A	#N/A	#N/A	#N/A		B3GLCT	TRAPPC12	B4GALNT3	C10orf32	AFG1L	ADORA1	KIDINS220	PECR	ANAPC13
sp|P53634|CATC_HUMAN	CTSC	CATC_HUMAN Dipeptidyl peptidase 1	40	16044.6	12459.1	14251.9	11771.5	12326.3	12048.9	0.845427	-0.242248	14141.5	11415.4	12778.5	0.896617	-0.157436	12657	13969	13313	0.934124	-0.0983135	12312.9	6041.36	9177.13	0.643926	-0.635034	#N/A	#N/A	#N/A	CTSC	#N/A	#N/A	#N/A	#N/A	#N/A	#N/A	#N/A	#N/A	#N/A		BCAP29	TRAPPC2	B4GALNT4	C12orf66	AFG3L2	ADORA2A	LDLRAD4	PEX1	ANHX
sp|Q9UBX1|CATF_HUMAN	CTSF	CATF_HUMAN Cathepsin F	2	1067.37	1130.43	1098.9	585.201	534.493	559.847	0.509461	-0.972956	463.793	539.717	501.755	0.456598	-1.13101	615.656	609.951	612.803	0.557652	-0.842564	427.518	581.203	504.361	0.458969	-1.12353	#N/A	#N/A	#N/A	CTSF	#N/A	#N/A	#N/A	#N/A	#N/A	#N/A	#N/A	#N/A	#N/A		BFAR	UGGT1	B4GALT1	C17orf59	AGK	ADORA2B	MARCH3	PEX10	ANKRD1
sp|P09668|CATH_HUMAN	CTSH	CATH_HUMAN Pro-cathepsin H	6	1739.66	1528.66	1634.16	997.656	916.917	957.286	0.585797	-0.771527	1184.87	1355.2	1270.03	0.777179	-0.363681	1300.31	1314.51	1307.41	0.80005	-0.321838	1120.14	1143.62	1131.88	0.692637	-0.529828	#N/A	#N/A	#N/A	CTSH	#N/A	#N/A	#N/A	#N/A	#N/A	#N/A	#N/A	#N/A	#N/A		BSCL2	UGGT2	B4GALT2	C18orf8	AGMAT	ADORA3	MIB2	PEX11A	ANKRD11
sp|P07711|CATL1_HUMAN	CTSL	CATL1_HUMAN Cathepsin L1	10	4174.02	4155.33	4164.68	2227.01	2060.58	2143.8	0.514757	-0.958037	2389.34	2323.9	2356.62	0.565859	-0.821485	2887.19	2756.5	2821.85	0.677567	-0.561565	2343.2	2934.97	2639.09	0.633683	-0.658166	#N/A	#N/A	#N/A	CTSL	#N/A	#N/A	#N/A	#N/A	#N/A	#N/A	#N/A	#N/A	#N/A		CALR3	VMA21	B4GALT3	C1orf85	AGXT2	ADRA1D	MICALL1	PEX11B	ANKRD12
sp|P25774|CATS_HUMAN	CTSS	CATS_HUMAN Cathepsin S	11	5280.9	5785.37	5533.14	2867.96	3226.46	3047.21	0.55072	-0.860608	3457.92	2933.86	3195.89	0.577591	-0.791879	4178.08	4001.6	4089.84	0.739154	-0.436053	3386.08	4913.81	4149.94	0.750017	-0.415005	#N/A	#N/A	#N/A	CTSS	#N/A	#N/A	#N/A	#N/A	#N/A	#N/A	#N/A	#N/A	#N/A		CANX	VMP1	B4GALT4	CCZ1	AK2	ADRA2A	MITD1	PEX11G	ANKRD23
sp|Q9UBR2|CATZ_HUMAN	CTSZ	CATZ_HUMAN Cathepsin Z	21	7634.71	8069.63	7852.17	4654.29	4444.48	4549.39	0.579379	-0.78742	4988.21	4597.04	4792.62	0.610357	-0.712275	5526.23	5570.91	5548.57	0.706629	-0.500975	4698.55	6399.83	5549.19	0.706708	-0.500814	#N/A	#N/A	#N/A	CTSZ	#N/A	#N/A	#N/A	#N/A	#N/A	#N/A	#N/A	#N/A	#N/A		CCDC47		B4GALT5	CCZ1B	AK3	ADRA2C	MTMR2	PEX12	ANKRD28
sp|Q8NBI2-2|CYAC3_HUMAN	CYB561A3	CYAC3_HUMAN Isoform 2 of Cytochrome b ascorbate-dependent protein 3	1	242.7	305.686	274.193	243.434	213.978	228.706	0.834106	-0.261698	139.134	189.473	164.303	0.599226	-0.738829	215.907	179.433	197.67	0.720916	-0.472098	196.994	678.363	437.679	1.59624	0.67468	#N/A	#N/A	#N/A	CYB561A3	#N/A	#N/A	#N/A	#N/A	#N/A	#N/A	#N/A	#N/A	#N/A		CDC14C		B4GALT6	CD63	AK4	ADRB3	MVB12B	PEX13	ANKRD31
sp|Q9H3Z4|DNJC5_HUMAN	DNAJC5	DNJC5_HUMAN DnaJ homolog subfamily C member 5	19	5072.89	5447.53	5260.21	4547.24	4515	4531.12	0.861395	-0.215253	4792.05	4004.14	4398.1	0.836106	-0.258242	4227.7	4270.17	4248.93	0.80775	-0.308019	3709.91	4468.95	4089.43	0.777427	-0.363221	#N/A	#N/A	#N/A	DNAJC5	#N/A	DNAJC5	#N/A	#N/A	#N/A	#N/A	#N/A	#N/A	#N/A		CDKAL1		B4GALT7	CLCN3	AKAP1	ADTRP	OCIAD1	PEX14	ANKRD49
sp|O00115|DNS2A_HUMAN	DNASE2	DNS2A_HUMAN Deoxyribonuclease-2-alpha	12	4824.43	4781.4	4802.91	2865.22	2779.77	2822.49	0.587663	-0.766939	3355.34	2932.66	3144	0.654602	-0.611309	3734.23	3818.73	3776.48	0.786289	-0.346868	3104.87	3627.52	3366.19	0.700865	-0.512792	#N/A	#N/A	#N/A	DNASE2	#N/A	#N/A	#N/A	#N/A	#N/A	#N/A	#N/A	#N/A	#N/A		CDS1		B4GAT1	CLCN7	ALAS1	AGTR1	OCIAD2	PEX16	APOBEC3B
sp|Q9UHL4|DPP2_HUMAN	DPP7	DPP2_HUMAN Dipeptidyl peptidase 2	58	17267.8	18911.4	18089.6	11943.1	12560.6	12251.9	0.677287	-0.562161	13416.1	12580.1	12998.1	0.71854	-0.47686	13769.7	15404.2	14587	0.806372	-0.310482	13874.2	20525.2	17199.7	0.950806	-0.0727771	#N/A	#N/A	#N/A	DPP7	#N/A	#N/A	#N/A	#N/A	#N/A	#N/A	#N/A	#N/A	#N/A		CERCAM		BET1	CLN3	ALAS2	AGTR2	PIK3C3	PEX19	AQR
sp|Q8N682|DRAM1_HUMAN	DRAM1	DRAM1_HUMAN DNA damage-regulated autophagy modulator protein 1	2	2265.95	2631	2448.47	2071.8	1584.77	1828.29	0.746704	-0.421392	2024.44	1308.13	1666.29	0.68054	-0.555248	1619.64	1853.1	1736.37	0.709164	-0.495809	1681.83	1916.94	1799.38	0.7349	-0.44438	#N/A	#N/A	#N/A	DRAM1	#N/A	#N/A	#N/A	#N/A	#N/A	#N/A	#N/A	#N/A	#N/A		CERS1		BET1L	CLN5	ALDH18A1	AIG1	PIK3R4	PEX2	ARGFX
sp|Q6UX65|DRAM2_HUMAN	DRAM2	DRAM2_HUMAN DNA damage-regulated autophagy modulator protein 2	7	1979.08	2636.28	2307.68	1561.31	1468.21	1514.76	0.6564	-0.607354	1708.14	1372.32	1540.23	0.667437	-0.583297	1540.41	1715.6	1628.01	0.705473	-0.503338	1592.37	3083.42	2337.89	1.01309	0.018767	#N/A	#N/A	#N/A	DRAM2	#N/A	#N/A	#N/A	#N/A	#N/A	#N/A	#N/A	#N/A	#N/A		CERS2		BICD1	CTBS	ALDH1B1	AJAP1	PIKFYVE	PEX26	ARGLU1
sp|Q9UM22|EPDR1_HUMAN	EPDR1	EPDR1_HUMAN Mammalian ependymin-related protein 1	13	3574.74	4281.76	3928.25	2453.67	2366.16	2409.91	0.613483	-0.704904	2776.47	2530.61	2653.54	0.675502	-0.565968	2783.9	2947.79	2865.85	0.729548	-0.454926	2604.57	3612.32	3108.45	0.791305	-0.337694	#N/A	#N/A	#N/A	EPDR1	#N/A	#N/A	#N/A	#N/A	#N/A	#N/A	#N/A	#N/A	#N/A		CERS3		C17orf75	CTNS	ALDH1L2	AJM1	PLEKHB2	PEX3	ARHGAP19
sp|P04066|FUCO_HUMAN	FUCA1	FUCO_HUMAN Tissue alpha-L-fucosidase	13	4619.48	5448.13	5033.81	3184.92	3141.74	3163.33	0.628417	-0.670205	3586.38	3115.83	3351.11	0.66572	-0.587012	3744.7	3981.86	3863.28	0.767467	-0.381823	3254.02	5286.95	4270.48	0.848361	-0.237249	#N/A	#N/A	#N/A	FUCA1	#N/A	#N/A	#N/A	#N/A	#N/A	#N/A	#N/A	#N/A	#N/A		CERS4		CASD1	CTSA	ALDH2	AKAP7	PLIN3	PEX5	ARHGAP39
sp|P10253|LYAG_HUMAN	GAA	LYAG_HUMAN Lysosomal alpha-glucosidase	89	21851.1	22549.4	22200.2	13031.9	14034	13533	0.609585	-0.7141	16177.7	13935.4	15056.5	0.678215	-0.560185	17021.5	18192.7	17607.1	0.793104	-0.334419	14812.9	21951.7	18382.3	0.828022	-0.272259	#N/A	#N/A	#N/A	GAA	#N/A	#N/A	#N/A	#N/A	#N/A	#N/A	#N/A	#N/A	#N/A		CERS5		CCDC91	CTSB	ALDH4A1	ALG10B	PPP1R21	PEX6	ARID1A
sp|P54803|GALC_HUMAN	GALC	GALC_HUMAN Galactocerebrosidase	12	2354.16	2503.26	2428.71	1667.37	1759.26	1713.32	0.705442	-0.5034	1888.62	1720.65	1804.63	0.743043	-0.428483	1992.29	2103.98	2048.14	0.843302	-0.245879	1812.35	2696.25	2254.3	0.928188	-0.107511	#N/A	#N/A	#N/A	GALC	#N/A	#N/A	#N/A	#N/A	#N/A	#N/A	#N/A	#N/A	#N/A		CERS6		CERT	CTSC	ALDH5A1	ALK	PRAF2	PEX7	ARID1B
sp|P34059|GALNS_HUMAN	GALNS	GALNS_HUMAN N-acetylgalactosamine-6-sulfatase	36	12605.8	12989.9	12797.8	8434.13	8667.57	8550.85	0.668147	-0.581762	9537.32	8443.51	8990.42	0.702494	-0.509442	10106.2	10529.6	10317.9	0.806221	-0.310752	9183.13	11770	10476.6	0.818619	-0.288736	#N/A	#N/A	#N/A	GALNS	#N/A	#N/A	#N/A	#N/A	#N/A	#N/A	#N/A	#N/A	#N/A		CES1		CHPF2	CTSD	ALDH6A1	ALPG	RAB10	PHYH	ARID2
sp|P04062|GLCM_HUMAN	GBA	GLCM_HUMAN Glucosylceramidase	66	26757	30554.8	28655.9	21309.2	20620.8	20965	0.731612	-0.450849	21493	19128.1	20310.5	0.708774	-0.496603	21978.6	24236.1	23107.3	0.806373	-0.31048	20677.2	29947.9	25312.6	0.883328	-0.178979	#N/A	#N/A	#N/A	GBA	#N/A	#N/A	#N/A	#N/A	#N/A	#N/A	#N/A	#N/A	#N/A		CES2		CHPT1	CTSF	ALKBH7	ALPI	RAB11A	PIPOX	ARID3B
sp|Q92820|GGH_HUMAN	GGH	GGH_HUMAN Gamma-glutamyl hydrolase	77	35577.7	37156.7	36367.2	24551.5	24274.6	24413	0.671293	-0.574985	25091.4	21787	23439.2	0.644515	-0.633715	28190.5	27815.8	28003.2	0.770011	-0.377049	24336.5	31861.5	28099	0.772647	-0.372119	#N/A	#N/A	#N/A	GGH	#N/A	#N/A	#N/A	#N/A	#N/A	#N/A	#N/A	#N/A	#N/A		CES3		CHST1	CTSH	AMT	ALPK2	RAB11B	PXMP2	ARID3C
sp|P06280|AGAL_HUMAN	GLA	AGAL_HUMAN Alpha-galactosidase A	28	11148.7	11349.5	11249.1	8159.77	8207.34	8183.56	0.727485	-0.45901	8960.18	7599.36	8279.77	0.736038	-0.442147	9105.1	9920.28	9512.69	0.84564	-0.241884	8626.24	9290.92	8958.58	0.796382	-0.328468	#N/A	#N/A	#N/A	GLA	#N/A	#N/A	#N/A	#N/A	#N/A	#N/A	#N/A	#N/A	#N/A		CH25H		CHST10	CTSK	ANTKMT	ALPL	RAB11FIP1	PXMP4	ARID4A
sp|P16278|BGAL_HUMAN	GLB1	BGAL_HUMAN Beta-galactosidase	51	19715.3	22619.3	21167.3	13841.3	13705.8	13773.5	0.650699	-0.619937	14804.9	12965.3	13885.1	0.655969	-0.6083	15790.5	16905.3	16347.9	0.772319	-0.372732	14612.9	20624.3	17618.6	0.83235	-0.264738	#N/A	#N/A	#N/A	GLB1	#N/A	#N/A	#N/A	#N/A	#N/A	#N/A	#N/A	#N/A	#N/A		CLGN		CHST11	CTSL	APOO	ALPP	RAB12	PXT1	ARID5A
sp|P17900|SAP3_HUMAN	GM2A	SAP3_HUMAN Ganglioside GM2 activator	7	2815.77	3043.32	2929.55	2071.08	1976.63	2023.86	0.690843	-0.533571	2314.42	2742.64	2528.53	0.863114	-0.212378	2292.98	2508.09	2400.53	0.819422	-0.287321	2213.38	2171.91	2192.64	0.748459	-0.418004	#N/A	#N/A	#N/A	GM2A	#N/A	#N/A	#N/A	#N/A	#N/A	#N/A	#N/A	#N/A	#N/A		CLN6		CHST12	CTSO	APOOL	AMER2	RAB14	SLC25A17	ARID5B
sp|P15586|GNS_HUMAN	GNS	GNS_HUMAN N-acetylglucosamine-6-sulfatase	55	26234.2	26246.2	26240.2	16965.8	17258.7	17112.2	0.652139	-0.616749	18944.9	17554.7	18249.8	0.69549	-0.523898	19811	20815.2	20313.1	0.774121	-0.369368	17777.4	23021.6	20399.5	0.777414	-0.363245	#N/A	#N/A	#N/A	GNS	#N/A	#N/A	#N/A	#N/A	#N/A	#N/A	#N/A	#N/A	#N/A		CLN8		CHST13	CTSS	AQP8	AMER3	RAB17	TMEM35A	ARL6IP4
sp|P28799|GRN_HUMAN	GRN	GRN_HUMAN Granulins	1	129.072	130.952	130.012	132.192	130.693	131.442	1.011	0.015787	148.589	125.715	137.152	1.05492	0.0771309	145.924	135.837	140.88	1.0836	0.115827	131.377	214.289	172.833	1.32936	0.410734	#N/A	#N/A	#N/A	GRN	#N/A	#N/A	#N/A	#N/A	#N/A	#N/A	#N/A	#N/A	#N/A		CNPY2		CHST14	CTSV	ARG2	AMIGO1	RAB1A	TYSND1	ARL6IP6
sp|P08236|BGLR_HUMAN	GUSB	BGLR_HUMAN Beta-glucuronidase	69	23875.7	26758.3	25317	15618.2	16677.1	16147.6	0.637818	-0.648782	18791.2	15569.1	17180.2	0.678601	-0.559364	19056.8	21036	20046.4	0.791816	-0.336763	17807.3	25315.2	21561.2	0.851651	-0.231666	#N/A	#N/A	#N/A	GUSB	#N/A	#N/A	#N/A	#N/A	#N/A	#N/A	#N/A	#N/A	#N/A		CNPY3		CHST15	CTSZ	ARMCX1	ANO10	RAB22A	URAD	ARNT
sp|P06865|HEXA_HUMAN	HEXA	HEXA_HUMAN Beta-hexosaminidase subunit alpha	69	31685.9	34005.9	32845.9	18984.3	19563.1	19273.7	0.586792	-0.76908	23201.3	19944.7	21573	0.656794	-0.606486	24710	25239.7	24974.8	0.760364	-0.395237	21272.5	30945.8	26109.2	0.794898	-0.331158	#N/A	#N/A	#N/A	HEXA	#N/A	#N/A	#N/A	#N/A	#N/A	#N/A	#N/A	#N/A	#N/A		COLGALT1		CHST2	CYB561A3	ARMCX2	ANO2	RAB27A	ZADH2	ARNT2
sp|P07686|HEXB_HUMAN	HEXB	HEXB_HUMAN Beta-hexosaminidase subunit beta	82	44193.2	46773.2	45483.2	30183.7	29739.5	29961.6	0.65874	-0.602219	33753.5	28625.9	31189.7	0.685741	-0.544264	35712.3	37901.5	36806.9	0.809242	-0.305358	32533.8	39170.1	35851.9	0.788246	-0.343282	#N/A	#N/A	#N/A	HEXB	#N/A	#N/A	#N/A	#N/A	#N/A	#N/A	#N/A	#N/A	#N/A		COLGALT2		CHST3	DNAJC5	ARMCX6	ANO3	RAB27B		ARNTL2
sp|Q68CP4|HGNAT_HUMAN	HGSNAT	HGNAT_HUMAN Heparan-alpha-glucosaminide N-acetyltransferase	7	1415.7	1817.73	1616.72	1076.43	1032.63	1054.53	0.652267	-0.616465	1326.13	1002.14	1164.13	0.720062	-0.473807	1119.61	1400.65	1260.13	0.779439	-0.359493	1095.56	1700.69	1398.12	0.864794	-0.209572	#N/A	#N/A	#N/A	HGSNAT	#N/A	#N/A	#N/A	#N/A	#N/A	#N/A	#N/A	#N/A	#N/A		CRELD2		CHST4	DNASE2	ASB9	ANO4	RAB4A		ARX
sp|P22304|IDS_HUMAN	IDS	IDS_HUMAN Iduronate 2-sulfatase	12	3428.33	3592.23	3510.28	2253.63	2311.56	2282.6	0.65026	-0.620911	2516.59	2414.51	2465.55	0.70238	-0.509677	2708	2736.84	2722.42	0.775556	-0.366696	2525.17	3235.29	2880.23	0.820513	-0.285402	#N/A	#N/A	#N/A	IDS	#N/A	#N/A	#N/A	#N/A	#N/A	#N/A	#N/A	#N/A	#N/A		CTSW		CHST5	DNASE2B	ATAD3A	ANO6	RAB5A		ASCC1
sp|P35475|IDUA_HUMAN	IDUA	IDUA_HUMAN Alpha-L-iduronidase	38	8608.37	9601.08	9104.73	6111.72	6008.81	6060.27	0.665618	-0.587235	6694.85	5765.97	6230.41	0.684305	-0.547288	7100.58	7875.73	7488.15	0.822447	-0.282005	6513.96	8392.03	7453	0.818585	-0.288795	#N/A	#N/A	#N/A	IDUA	#N/A	#N/A	#N/A	#N/A	#N/A	#N/A	#N/A	#N/A	#N/A		CYB561D2		CHST6	DPP7	ATAD3B	ANO8	RAB5B		ASCC2
sp|P13284|GILT_HUMAN	IFI30	GILT_HUMAN Gamma-interferon-inducible lysosomal thiol reductase	12	3089.9	4178.11	3634.01	2176.38	2225.35	2200.86	0.605631	-0.72349	2516.31	2072.4	2294.36	0.631357	-0.663472	2587.6	2918.84	2753.22	0.757627	-0.400441	2565.93	3597.14	3081.53	0.847972	-0.237911	#N/A	#N/A	#N/A	IFI30	#N/A	#N/A	#N/A	#N/A	#N/A	#N/A	#N/A	#N/A	#N/A		CYB5A		CHST7	DRAM1	ATP5F1A	ANO9	RAB7A		ASCC3
sp|Q9BQD3|KXDL1_HUMAN	KXD1	KXDL1_HUMAN KxDL motif-containing protein 1	9	1898.75	2081.53	1990.14	1036.21	1014.77	1025.49	0.515285	-0.956556	1352.57	1148.43	1250.5	0.628348	-0.670365	1333.6	1405.17	1369.38	0.688085	-0.539342	1256.51	1553.64	1405.08	0.706018	-0.502223	#N/A	#N/A	#N/A	KXD1	#N/A	#N/A	#N/A	#N/A	#N/A	#N/A	#N/A	#N/A	#N/A		CYB5R4		CHST8	DRAM2	ATP5F1B	ANPEP	RAB7B		ASCL1
sp|P11279|LAMP1_HUMAN	LAMP1	LAMP1_HUMAN Lysosome-associated membrane glycoprotein 1	21	9385.89	10369.8	9877.84	7729.91	7969.48	7849.69	0.794677	-0.33156	8483.37	7427.77	7955.57	0.805395	-0.312231	7879.17	8513.08	8196.12	0.829748	-0.269254	7612	12662.4	10137.2	1.02626	0.037391	#N/A	#N/A	#N/A	LAMP1	#N/A	#N/A	#N/A	#N/A	#N/A	#N/A	#N/A	#N/A	#N/A		CYBC1		CHST9	EPDR1	ATP5F1C	ANTXR1	RAB8A		ASCL2
sp|P13473-2|LAMP2_HUMAN	LAMP2	LAMP2_HUMAN Isoform LAMP-2B of Lysosome-associated membrane glycoprotein 2	25	7036.62	7972.72	7504.67	5104.18	4913.19	5008.68	0.667409	-0.583357	5369.81	4791.38	5080.6	0.676991	-0.562791	5608.01	5600.25	5604.13	0.746752	-0.421298	4958.19	7539.83	6249.01	0.832683	-0.264161	#N/A	#N/A	#N/A	LAMP2	#N/A	#N/A	#N/A	#N/A	#N/A	#N/A	LAMP2	#N/A	#N/A		CYP17A1		CHSY1	FUCA1	ATP5F1D	AOC3	RAB9A		ASCL3
sp|Q9UQV4|LAMP3_HUMAN	LAMP3	LAMP3_HUMAN Lysosome-associated membrane glycoprotein 3	21	7441.13	10872.6	9156.86	8425.43	7550.75	7988.09	0.872361	-0.197003	6450.5	5578.89	6014.69	0.656851	-0.606362	6753.64	6905.29	6829.47	0.74583	-0.423081	6099.05	11230.6	8664.83	0.946265	-0.0796831	#N/A	#N/A	#N/A	LAMP3	#N/A	#N/A	#N/A	#N/A	#N/A	#N/A	#N/A	#N/A	#N/A		CYP19A1		CHSY3	GAA	ATP5F1E	APCDD1	RABEP1		ASCL4
sp|Q6IAA8|LTOR1_HUMAN	LAMTOR1	LTOR1_HUMAN Ragulator complex protein LAMTOR1	49	11790.8	11313.5	11552.1	11524.1	11282	11403	0.987093	-0.0187416	10709.6	9013.6	9861.6	0.853659	-0.228268	9430.04	10787.2	10108.6	0.875042	-0.192575	9019.8	7941.19	8480.49	0.734105	-0.445941	#N/A	#N/A	#N/A	LAMTOR1	#N/A	#N/A	#N/A	#N/A	#N/A	#N/A	#N/A	LAMTOR1	#N/A		CYP1A2		COG1	GALC	ATP5F1EP2	APLNR	RABEPK		ASCL5
sp|Q9Y2Q5|LTOR2_HUMAN	LAMTOR2	LTOR2_HUMAN Ragulator complex protein LAMTOR2	19	4494	4379.89	4436.94	4380.59	3982.73	4181.66	0.942464	-0.0854909	4328.99	3225.48	3777.23	0.851314	-0.232236	3438.32	3917.94	3678.13	0.828978	-0.270594	3348.41	2927.07	3137.74	0.707185	-0.499841	#N/A	#N/A	#N/A	LAMTOR2	#N/A	#N/A	#N/A	#N/A	#N/A	#N/A	#N/A	LAMTOR2	#N/A		CYP21A2		COG2	GALNS	ATP5IF1	APOBR	RABGEF1		ASF1A
sp|Q9UHA4|LTOR3_HUMAN	LAMTOR3	LTOR3_HUMAN Ragulator complex protein LAMTOR3	19	6601.45	6310.57	6456.01	6629.62	6173.24	6401.43	0.991546	-0.0122486	6009.4	4922.04	5465.72	0.84661	-0.240231	5035.97	6018.94	5527.45	0.856172	-0.224027	5014.61	5649.25	5331.93	0.825886	-0.275985	#N/A	#N/A	#N/A	LAMTOR3	#N/A	#N/A	#N/A	#N/A	#N/A	#N/A	#N/A	LAMTOR3	#N/A		CYP26A1		COG3	GBA	ATP5MC1	APOLD1	RAP2A		ASF1B
sp|Q0VGL1|LTOR4_HUMAN	LAMTOR4	LTOR4_HUMAN Ragulator complex protein LAMTOR4	7	3110.33	3306.15	3208.24	3052.46	2748.07	2900.27	0.904005	-0.145597	2989.23	2184.55	2586.89	0.806327	-0.310563	2296.33	2723.58	2509.95	0.782346	-0.354121	2231.47	2036.64	2134.05	0.665179	-0.588185	#N/A	#N/A	#N/A	LAMTOR4	#N/A	#N/A	#N/A	#N/A	#N/A	#N/A	#N/A	LAMTOR4	#N/A		CYP26B1		COG4	GGH	ATP5MC2	AQP1	RAP2B		ASH1L
sp|O43504|LTOR5_HUMAN	LAMTOR5	LTOR5_HUMAN Ragulator complex protein LAMTOR5	9	3314.52	3269.69	3292.11	3053.72	3037.17	3045.44	0.925075	-0.112357	2855.65	2384.15	2619.9	0.795813	-0.329499	2612.74	2766.39	2689.56	0.816974	-0.291637	2385.88	2301.31	2343.6	0.711883	-0.490287	#N/A	#N/A	#N/A	LAMTOR5	#N/A	#N/A	#N/A	#N/A	#N/A	#N/A	#N/A	LAMTOR5	#N/A		CYP2A13		COG5	GLA	ATP5MC3	AQP10	RAP2C		ASH2L
sp|Q15012|LAP4A_HUMAN	LAPTM4A	LAP4A_HUMAN Lysosomal-associated transmembrane protein 4A	2	111.68	109.828	110.754	118.175	111.652	114.913	1.03756	0.0531895	118.211	86.4938	102.352	0.924142	-0.113814	127.619	144.702	136.161	1.2294	0.297949	181.092	131.585	156.339	1.41158	0.497314	#N/A	#N/A	#N/A	LAPTM4A	#N/A	#N/A	#N/A	#N/A	#N/A	#N/A	#N/A	#N/A	#N/A		CYP2A6		COG6	GLB1	ATP5MD	AQP3	RAPGEF1		ASXL1
sp|Q86VI4|LAP4B_HUMAN	LAPTM4B	LAP4B_HUMAN Lysosomal-associated transmembrane protein 4B	4	520.612	512.149	516.38	466.161	469.902	468.031	0.906369	-0.141829	515.781	327.628	421.704	0.816655	-0.292202	492.201	572.803	532.502	1.03122	0.0443524	661.957	710.517	686.237	1.32894	0.410272	#N/A	#N/A	#N/A	LAPTM4B	#N/A	#N/A	#N/A	#N/A	#N/A	#N/A	#N/A	LAPTM4B	#N/A		CYP2A7		COG7	GM2A	ATP5ME	AQP9	RASGEF1B		ASXL2
sp|Q99538|LGMN_HUMAN	LGMN	LGMN_HUMAN Legumain	6	713.706	683.558	698.632	184.528	164.37	174.449	0.249701	-2.00173	209.64	195.832	202.736	0.29019	-1.78493	259.583	281.275	270.429	0.387084	-1.36928	159.673	213.352	186.512	0.266968	-1.90526	#N/A	#N/A	#N/A	LGMN	#N/A	#N/A	#N/A	#N/A	#N/A	#N/A	#N/A	#N/A	#N/A		CYP2B6		COG8	GNS	ATP5MF	ARHGEF39	RASSF9		ASXL3
sp|P38571|LICH_HUMAN	LIPA	LICH_HUMAN Lysosomal acid lipase/cholesteryl ester hydrolase	8	7195.83	9929.05	8562.44	5011.04	4746.01	4878.52	0.569759	-0.811577	5597.13	4319.2	4958.16	0.57906	-0.788216	5818.11	6045.27	5931.69	0.692757	-0.529579	5375.6	8046.15	6710.88	0.783757	-0.351521	#N/A	#N/A	#N/A	LIPA	#N/A	#N/A	#N/A	#N/A	#N/A	#N/A	#N/A	#N/A	#N/A		CYP2C18		COPA	GPR137B	ATP5MG	ARL13B	REP15		ATAD2
sp|Q9NUN5|LMBD1_HUMAN	LMBRD1	LMBD1_HUMAN Probable lysosomal cobalamin transporter	4	1304.51	1357.71	1331.11	1073.87	1014.75	1044.31	0.784541	-0.35008	1095.01	980.901	1037.96	0.779767	-0.358885	1035.89	1087.15	1061.52	0.79747	-0.326498	921.549	1228.93	1075.24	0.807777	-0.307972	#N/A	#N/A	#N/A	LMBRD1	#N/A	#N/A	#N/A	#N/A	#N/A	#N/A	#N/A	#N/A	#N/A		CYP2C19		COPB1	GRN	ATP5MGL	ARRDC1	RIN3		ATAD2B
sp|O00754|MA2B1_HUMAN	MAN2B1	MA2B1_HUMAN Lysosomal alpha-mannosidase	61	19962.1	20975.1	20468.6	14945.3	15405.2	15175.2	0.741392	-0.431692	17783.2	14993	16388.1	0.800646	-0.320764	16526.2	18871.9	17699.1	0.864693	-0.209741	17560.8	17643.4	17602.1	0.859956	-0.217665	#N/A	#N/A	#N/A	MAN2B1	#N/A	#N/A	#N/A	#N/A	#N/A	#N/A	#N/A	#N/A	#N/A		CYP2C8		COPB2	GUSB	ATP5MPL	ART3	RPS6KC1		ATAD5
sp|Q9Y2E5|MA2B2_HUMAN	MAN2B2	MA2B2_HUMAN Epididymis-specific alpha-mannosidase	11	2308.91	2171.93	2240.42	1764.43	1738.56	1751.49	0.781771	-0.355182	1984.61	1679.58	1832.09	0.817746	-0.290275	1834.26	2079	1956.63	0.873332	-0.195398	1976.98	1979.11	1978.05	0.88289	-0.179694	#N/A	#N/A	#N/A	MAN2B2	#N/A	#N/A	#N/A	#N/A	#N/A	#N/A	#N/A	#N/A	#N/A		CYP2C9		COPE	HEXA	ATP5PB	ART4	RUFY1		ATF1
sp|O00462|MANBA_HUMAN	MANBA	MANBA_HUMAN Beta-mannosidase	51	17214.1	18860.3	18037.2	10964.3	10905.3	10934.8	0.606236	-0.722049	12612.4	10965.4	11788.9	0.653588	-0.613546	13620.5	14057.3	13838.9	0.767242	-0.382246	11571.9	18764.1	15168	0.840929	-0.249945	#N/A	#N/A	#N/A	MANBA	#N/A	#N/A	#N/A	#N/A	#N/A	#N/A	#N/A	#N/A	#N/A		CYP2D6		COPG1	HEXB	ATP5PD	ASIC1	SAMD9L		ATF3
sp|Q9GZU1|MCLN1_HUMAN	MCOLN1	MCLN1_HUMAN Mucolipin-1	4	324.28	358.243	341.261	302.574	263.519	283.047	0.829412	-0.269839	297.411	251.016	274.214	0.803529	-0.315578	276.686	298.978	287.832	0.843435	-0.245651	271.968	368.215	320.091	0.937965	-0.0923933	#N/A	#N/A	#N/A	MCOLN1	#N/A	#N/A	#N/A	#N/A	#N/A	#N/A	#N/A	#N/A	#N/A		CYP2F1		COPG2	HGSNAT	ATP5PF	ASIC2	SBF2		ATF7IP
sp|Q8NHS3|MFSD8_HUMAN	MFSD8	MFSD8_HUMAN Major facilitator superfamily domain-containing protein 8	4	444.273	569.531	506.902	381.556	367.295	374.425	0.738655	-0.437028	408.396	337.882	373.139	0.736117	-0.441994	342.681	458.828	400.755	0.790596	-0.338988	367.949	572.192	470.071	0.92734	-0.10883	#N/A	#N/A	#N/A	MFSD8	#N/A	#N/A	#N/A	#N/A	#N/A	#N/A	#N/A	#N/A	#N/A		CYP2J2		COPZ1	HYAL1	ATP5PO	ASIC5	SCAMP1		ATF7IP2
sp|Q7L1V2|MON1B_HUMAN	MON1B	MON1B_HUMAN Vacuolar fusion protein MON1 homolog B	2	169.687	175.129	172.408	163.545	141.081	152.313	0.883445	-0.178788	161.61	153.75	157.68	0.914575	-0.128827	157.889	180.61	169.25	0.98168	-0.0266751	140.07	132.062	136.066	0.789209	-0.34152	#N/A	#N/A	#N/A	MON1B	#N/A	#N/A	#N/A	#N/A	#N/A	#N/A	#N/A	#N/A	#N/A		CYP2R1		COPZ2	IDS	ATPAF1	ATP1A1	SCAMP2		ATMIN
sp|Q02083|NAAA_HUMAN	NAAA	NAAA_HUMAN N-acylethanolamine-hydrolyzing acid amidase	17	4745.7	6226.15	5485.92	3568.75	3634.67	3601.71	0.656537	-0.607053	3868.38	3362.15	3615.27	0.659007	-0.601633	3940.95	4367	4153.98	0.757206	-0.401242	3779.96	6303.17	5041.57	0.919	-0.121863	#N/A	#N/A	#N/A	NAAA	#N/A	#N/A	#N/A	#N/A	#N/A	#N/A	#N/A	#N/A	#N/A		CYP2S1		CSGALNACT1	IDUA	ATPAF2	ATP1A2	SCAMP5		ATOH1
sp|P17050|NAGAB_HUMAN	NAGA	NAGAB_HUMAN Alpha-N-acetylgalactosaminidase	15	4939.02	5150.33	5044.68	2965.53	3151.81	3058.67	0.606317	-0.721857	3823.72	3446.29	3635.01	0.720563	-0.472804	4011.89	4105.91	4058.9	0.804591	-0.313673	3440.68	5000.77	4220.73	0.836669	-0.25727	#N/A	#N/A	#N/A	NAGA	#N/A	#N/A	#N/A	#N/A	#N/A	#N/A	#N/A	#N/A	#N/A		CYP2U1		CSGALNACT2	IFI30	ATPSCKMT	ATP1A3	SGK3		ATOH7
sp|P54802|ANAG_HUMAN	NAGLU	ANAG_HUMAN Alpha-N-acetylglucosaminidase	39	12026.5	12771	12398.8	7898	8093.04	7995.52	0.644865	-0.632931	9442.99	8218.51	8830.75	0.712229	-0.489587	9587.29	10471.5	10029.4	0.808904	-0.30596	9134.63	11632.2	10383.4	0.837457	-0.255914	#N/A	#N/A	#N/A	NAGLU	#N/A	#N/A	#N/A	#N/A	#N/A	#N/A	#N/A	#N/A	#N/A		CYP39A1		CUX1	IL4I1	AUH	ATP1A4	SH3GL1		ATP1B4
sp|Q99519|NEUR1_HUMAN	NEU1	NEUR1_HUMAN Sialidase-1	16	6615.03	7948.27	7281.65	4538.08	4279.34	4408.71	0.605455	-0.723909	3645.6	3590.43	3618.01	0.496867	-1.00907	3595.73	3719.55	3657.64	0.502309	-0.993352	3179.36	3929.62	3554.49	0.488143	-1.03462	#N/A	#N/A	#N/A	NEU1	#N/A	#N/A	#N/A	#N/A	#N/A	#N/A	#N/A	#N/A	#N/A		CYP3A4		DAOA	ITFG2	BAK1	ATP1B1	SH3GL2		ATR
sp|O15118|NPC1_HUMAN	NPC1	NPC1_HUMAN Niemann-Pick C1 protein	39	14574.9	17203	15889	10693.3	10333.6	10513.5	0.661683	-0.595788	12113	9413.08	10763	0.677392	-0.561938	11351	12120	11735.5	0.738595	-0.437144	10502.5	16623.8	13563.1	0.853622	-0.228332	#N/A	#N/A	#N/A	NPC1	#N/A	#N/A	#N/A	#N/A	#N/A	#N/A	#N/A	#N/A	#N/A		CYP3A43		DENND4B	KPTN	BBC3	ATP1B2	SH3GL3		ATRIP
sp|P61916|NPC2_HUMAN	NPC2	NPC2_HUMAN Epididymal secretory protein E1	17	6752.44	7805.22	7278.83	4129.13	3871.56	4000.35	0.549586	-0.863582	4352.9	3913.35	4133.12	0.567828	-0.816474	4838.47	4618.53	4728.5	0.649624	-0.622324	4026.06	7219.37	5622.72	0.772475	-0.37244	#N/A	#N/A	#N/A	NPC2	#N/A	#N/A	#N/A	#N/A	#N/A	#N/A	#N/A	#N/A	#N/A		CYP3A5		DENND5A	KXD1	BCKDHA	ATP1B3	SLC26A7		ATRX
sp|Q86WC4|OSTM1_HUMAN	OSTM1	OSTM1_HUMAN Osteopetrosis-associated transmembrane protein 1	9	2766.22	2944.29	2855.26	2251.45	2260.42	2255.93	0.790099	-0.339894	2307.4	1992.96	2150.18	0.753061	-0.409162	2303.19	2314.96	2309.07	0.808711	-0.306305	2215.29	2898.41	2556.85	0.895489	-0.159252	#N/A	#N/A	#N/A	OSTM1	#N/A	#N/A	#N/A	#N/A	#N/A	#N/A	#N/A	#N/A	#N/A		CYP3A7		DOP1A	LAMP1	BCKDHB	ATP2B1	SLC9A6		ATXN1L
sp|Q9UHG3|PCYOX_HUMAN	PCYOX1	PCYOX_HUMAN Prenylcysteine oxidase 1	60	14912.5	16198.8	15555.6	13625.1	14163.5	13894.3	0.8932	-0.162946	14445.2	12044	13244.6	0.851433	-0.232034	13270.8	15190.2	14230.5	0.914812	-0.128452	13515.6	14621.5	14068.5	0.904401	-0.144965	#N/A	#N/A	#N/A	PCYOX1	#N/A	#N/A	#N/A	#N/A	#N/A	#N/A	#N/A	#N/A	#N/A		CYP46A1		DOP1B	LAMP2	BCKDK	ATP2B2	SLC9A9		ATXN3
sp|Q8NCC3|PAG15_HUMAN	PLA2G15	PAG15_HUMAN Group XV phospholipase A2	7	2421.34	2600.1	2510.72	2086.81	1816.15	1951.48	0.777259	-0.363532	2116.21	1672.74	1894.47	0.754554	-0.406303	1987.23	2332.8	2160.02	0.860317	-0.21706	2224.67	2014.63	2119.65	0.84424	-0.244275	#N/A	#N/A	#N/A	PLA2G15	#N/A	#N/A	#N/A	#N/A	#N/A	#N/A	#N/A	#N/A	#N/A		CYP4A11		EBAG9	LAMP3	BCLAF3	ATP2B3	SNX1		ATXN3L
sp|Q6P4A8|PLBL1_HUMAN	PLBD1	PLBL1_HUMAN Phospholipase B-like 1	18	4009.33	3685.56	3847.44	2981.8	3207.77	3094.78	0.804374	-0.314062	3822.06	3189.55	3505.81	0.911203	-0.134155	3317.09	4041.36	3679.23	0.956277	-0.0644988	3788.98	3266.8	3527.89	0.916944	-0.125095	#N/A	#N/A	#N/A	PLBD1	#N/A	#N/A	#N/A	#N/A	#N/A	#N/A	#N/A	#N/A	#N/A		CYP4A22		EIPR1	LAMTOR1	BCO2	ATP2B4	SNX11		ATXN7L3
sp|Q8NHP8|PLBL2_HUMAN	PLBD2	PLBL2_HUMAN Putative phospholipase B-like 2	33	9890.92	10517.6	10204.3	7589.79	7521	7555.4	0.740416	-0.433592	9041.77	7152.27	8097.02	0.793494	-0.333709	7962.9	9616.47	8789.68	0.861374	-0.215288	8161.81	7895.56	8028.69	0.786797	-0.345936	#N/A	#N/A	#N/A	PLBD2	#N/A	#N/A	#N/A	#N/A	#N/A	#N/A	#N/A	#N/A	#N/A		CYP4B1		ENTPD4	LAMTOR2	BCS1L	ATP4A	SNX13		ATXN8
sp|P50897|PPT1_HUMAN	PPT1	PPT1_HUMAN Palmitoyl-protein thioesterase 1	36	11941.7	13325.8	12633.8	9434.28	9221.13	9327.7	0.738316	-0.437689	9687.37	7686.12	8686.75	0.687582	-0.540395	9288.71	10930.9	10109.8	0.800222	-0.321528	9606.73	10224.9	9915.81	0.784867	-0.34948	#N/A	#N/A	#N/A	PPT1	#N/A	#N/A	#N/A	#N/A	#N/A	#N/A	#N/A	#N/A	#N/A		CYP4F11		ENTPD6	LAMTOR3	BDH1	ATP4B	SNX14		AZIN1
sp|Q9UMR5|PPT2_HUMAN	PPT2	PPT2_HUMAN Lysosomal thioesterase PPT2	11	3066.94	3599.48	3333.21	2600.2	2388.04	2494.12	0.748264	-0.418381	2687.08	2196.62	2441.85	0.732582	-0.448938	2696.56	3026.84	2861.7	0.858542	-0.22004	2680.09	2467.85	2573.97	0.77222	-0.372917	#N/A	#N/A	#N/A	PPT2	#N/A	#N/A	#N/A	#N/A	#N/A	#N/A	#N/A	#N/A	#N/A		CYP4F12		EXTL3	LAMTOR4	BNIP3	ATP6V0A4	SNX16		BACH1
sp|P42785|PCP_HUMAN	PRCP	PCP_HUMAN Lysosomal Pro-X carboxypeptidase	47	17195.7	19101.1	18148.4	12432.1	12816.3	12624.2	0.69561	-0.52365	13724	12865.2	13294.6	0.732549	-0.449002	13553.5	14988.9	14271.2	0.786361	-0.346736	13686.8	19023.9	16355.4	0.901201	-0.15008	#N/A	#N/A	#N/A	PRCP	#N/A	#N/A	#N/A	#N/A	#N/A	#N/A	#N/A	#N/A	#N/A		CYP4F2		FAM20B	LAMTOR5	BOLA1	AVPR1A	SNX17		BAHD1
sp|P07602|SAP_HUMAN	PSAP	SAP_HUMAN Prosaposin	49	24539.9	28419	26479.5	15498.2	14924.3	15211.2	0.574455	-0.799734	19148	14393.9	16771	0.633357	-0.658909	19762.4	17735.5	18749	0.708057	-0.498063	15984.5	21628.9	18806.7	0.710238	-0.493626	#N/A	#N/A	#N/A	PSAP	#N/A	#N/A	#N/A	#N/A	#N/A	#N/A	#N/A	#N/A	#N/A		CYP4F22		FAM91A1	LAPTM4A	BOLA3	AVPR1B	SNX18		BANP
sp|Q8N122|RPTOR_HUMAN	RPTOR	RPTOR_HUMAN Regulatory-associated protein of mTOR	20	3988.14	4336.51	4162.32	1822.2	1731.99	1777.1	0.426948	-1.22787	2391.59	2180.57	2286.08	0.549231	-0.864514	2794.94	2760.74	2777.84	0.667377	-0.583426	2612.42	3583.92	3098.17	0.744336	-0.425973	#N/A	#N/A	#N/A	RPTOR	#N/A	#N/A	#N/A	#N/A	#N/A	#N/A	#N/A	RPTOR	#N/A		CYP4F3		FHDC1	LAPTM4B	BRI3BP	AVPR2	SNX19		BAP18
sp|Q7L523|RRAGA_HUMAN	RRAGA	RRAGA_HUMAN Ras-related GTP-binding protein A	9	1033.33	1037.78	1035.55	764.995	806.929	785.962	0.758977	-0.397873	923.319	783.89	853.604	0.824297	-0.278764	814.931	920.847	867.889	0.838091	-0.254822	764.157	778.351	771.254	0.744774	-0.425126	#N/A	#N/A	#N/A	RRAGA	#N/A	#N/A	#N/A	#N/A	#N/A	#N/A	#N/A	RRAGA	#N/A		CYP4F8		FKTN	LAPTM5	C10orf67	AXL	SNX2		BARHL1
sp|Q9HB90|RRAGC_HUMAN	RRAGC	RRAGC_HUMAN Ras-related GTP-binding protein C	21	8152.19	8498.54	8325.36	6042.02	5962.53	6002.27	0.720962	-0.472004	6857.05	5963.42	6410.24	0.769964	-0.377136	6177.48	7165.4	6671.44	0.801339	-0.319515	5714.8	6739.67	6227.24	0.747983	-0.418922	#N/A	#N/A	#N/A	RRAGC	#N/A	#N/A	#N/A	#N/A	#N/A	#N/A	#N/A	RRAGC	#N/A		CYP4V2		FNDC3A	LGMN	C12orf65	BASP1	SNX20		BARHL2
sp|Q14108|SCRB2_HUMAN	SCARB2	SCRB2_HUMAN Lysosome membrane protein 2	56	24108.7	29143.7	26626.2	17657.6	17772.9	17715.2	0.665332	-0.587855	19256	16941.6	18098.8	0.679737	-0.556953	19515	20599.7	20057.3	0.753294	-0.408716	17465.1	32976.4	25220.8	0.947216	-0.0782354	#N/A	#N/A	#N/A	SCARB2	#N/A	#N/A	#N/A	#N/A	#N/A	#N/A	#N/A	#N/A	#N/A		CYP4X1		FUT1	LIPA	C14orf119	BDKRB1	SNX21		BARX1
sp|Q9HB40|RISC_HUMAN	SCPEP1	RISC_HUMAN Retinoid-inducible serine carboxypeptidase	52	21035.7	22467.6	21751.7	15891.5	15249	15570.2	0.715819	-0.482333	18971.9	14176.4	16574.2	0.761972	-0.39219	17766.1	20518.7	19142.4	0.880044	-0.184353	17316.2	17096.4	17206.3	0.791034	-0.338188	#N/A	#N/A	#N/A	SCPEP1	#N/A	#N/A	#N/A	#N/A	#N/A	#N/A	#N/A	#N/A	#N/A		CYP4Z1		FUT10	LMBRD1	C15orf62	BDKRB2	SNX25		BARX2
sp|P51688|SPHM_HUMAN	SGSH	SPHM_HUMAN N-sulphoglucosamine sulphohydrolase	32	8855.52	9083.89	8969.7	6184.73	6629.67	6407.2	0.714316	-0.485367	7467.47	6398.58	6933.02	0.772938	-0.371576	7028.87	8195.66	7612.26	0.848664	-0.236735	7228.03	7140.92	7184.48	0.800971	-0.320178	#N/A	#N/A	#N/A	SGSH	#N/A	#N/A	#N/A	#N/A	#N/A	#N/A	#N/A	#N/A	#N/A		CYP51A1		FUT11	MAN2B1	CA5A	BEST1	SNX27		BATF2
sp|Q9HAT2|SIAE_HUMAN	SIAE	SIAE_HUMAN Sialate O-acetylesterase	19	4855.68	5823.78	5339.73	3489.37	3480.65	3485.01	0.652657	-0.615604	3660	3245.17	3452.59	0.646584	-0.62909	4044.62	4132.41	4088.51	0.765678	-0.38519	3557.26	5895.16	4726.21	0.885103	-0.176083	#N/A	#N/A	#N/A	SIAE	#N/A	#N/A	#N/A	#N/A	#N/A	#N/A	#N/A	#N/A	#N/A		CYP7A1		FUT2	MAN2B2	CA5B	BEST2	SNX3		BATF3
sp|Q8N697|S15A4_HUMAN	SLC15A4	S15A4_HUMAN Solute carrier family 15 member 4	9	2933.38	3792.01	3362.7	2280.93	2205.73	2243.33	0.667123	-0.583976	2698.7	1993.89	2346.3	0.697742	-0.519234	2231.46	2789.43	2510.44	0.746557	-0.421675	2165.56	3615.18	2890.37	0.85954	-0.218364	#N/A	#N/A	#N/A	SLC15A4	#N/A	#N/A	#N/A	#N/A	#N/A	#N/A	#N/A	#N/A	#N/A		CYP7B1		FUT3	MANBA	CARS2	BEST3	SNX4		BAZ1A
sp|Q9NRA2|S17A5_HUMAN	SLC17A5	S17A5_HUMAN Sialin	5	960.419	1026.43	993.425	813.523	753.271	783.397	0.788582	-0.342667	804.243	704.061	754.152	0.759144	-0.397555	774.681	874.362	824.522	0.829979	-0.268853	746.1	884.202	815.151	0.820547	-0.285343	#N/A	#N/A	#N/A	SLC17A5	#N/A	#N/A	#N/A	#N/A	#N/A	#N/A	#N/A	#N/A	#N/A		CYP8B1		FUT4	MCOLN1	CBR4	BEST4	SNX5		BAZ1B
sp|Q86WA9|S2611_HUMAN	SLC26A11	S2611_HUMAN Sodium-independent sulfate anion transporter	8	1216.69	1545.76	1381.22	911.368	906.543	908.956	0.658079	-0.603667	1018.17	858.414	938.292	0.679319	-0.557839	961.877	1076.11	1018.99	0.737746	-0.438804	895.214	1500.92	1198.07	0.867395	-0.20524	#N/A	#N/A	#N/A	SLC26A11	#N/A	#N/A	#N/A	#N/A	#N/A	#N/A	#N/A	#N/A	#N/A		DAD1		FUT5	MCOLN2	CCDC51	BLK	SNX6		BAZ2A
sp|Q9BZD2|S29A3_HUMAN	SLC29A3	S29A3_HUMAN Equilibrative nucleoside transporter 3	1	85.839	82.3065	84.0727	60.1972	60.2494	60.2233	0.716324	-0.481316	56.4169	52.2248	54.3209	0.646117	-0.630132	63.2126	68.8226	66.0176	0.785244	-0.348788	65.3817	83.6551	74.5184	0.886356	-0.174042	#N/A	#N/A	#N/A	SLC29A3	#N/A	#N/A	#N/A	#N/A	#N/A	#N/A	#N/A	#N/A	#N/A		DDOST		FUT6	MCOLN3	CCDC90B	BMPR1A	SNX8		BAZ2B
sp|Q9UGQ3|GTR6_HUMAN	SLC2A6	GTR6_HUMAN Solute carrier family 2, facilitated glucose transporter member 6	8	2676.49	3952.7	3314.59	3077.98	2493.7	2785.84	0.840477	-0.25072	2519.97	2035.67	2277.82	0.687209	-0.541179	2292.05	2591.71	2441.88	0.736705	-0.44084	2229.03	3234.54	2731.78	0.824169	-0.278989	#N/A	#N/A	#N/A	SLC2A6	#N/A	#N/A	#N/A	#N/A	#N/A	#N/A	#N/A	#N/A	#N/A		DDRGK1		FUT7	MFSD8	CDS2	BMPR1B	SPPL2A		BBX
sp|Q7Z2H8|S36A1_HUMAN	SLC36A1	S36A1_HUMAN Proton-coupled amino acid transporter 1	1	1386.26	1988.02	1687.14	1052.02	965.306	1008.66	0.597854	-0.742135	1275.54	951.736	1113.64	0.660074	-0.599299	1011	1238.15	1124.58	0.666557	-0.5852	951.628	1489.64	1220.63	0.723493	-0.466949	#N/A	#N/A	#N/A	SLC36A1	#N/A	#N/A	#N/A	#N/A	#N/A	#N/A	#N/A	#N/A	#N/A		DEGS2		FUT8	MIOS	CEBPZOS	BMPR2	STAM		BCAS2
sp|Q9NVC3|S38A7_HUMAN	SLC38A7	S38A7_HUMAN Putative sodium-coupled neutral amino acid transporter 7	3	512.225	469.25	490.738	392.276	388.676	390.476	0.795692	-0.329718	442.305	328.969	385.637	0.785832	-0.347708	386.481	383.03	384.755	0.784035	-0.35101	363.752	467.32	415.536	0.846758	-0.239978	#N/A	#N/A	#N/A	SLC38A7	#N/A	#N/A	#N/A	#N/A	#N/A	#N/A	#N/A	#N/A	#N/A		DERL1		FUT9	MON1B	CHCHD10	BOC	STAM2		BCL11B
sp|Q8NBW4|S38A9_HUMAN	SLC38A9	S38A9_HUMAN Putative sodium-coupled neutral amino acid transporter 9	4	1534.86	1641.25	1588.05	1163.8	1213.17	1188.49	0.74839	-0.418137	1353.44	1251.48	1302.46	0.820161	-0.286022	1256.88	1386.71	1321.8	0.832336	-0.264762	1219.99	1571.35	1395.67	0.878855	-0.186303	#N/A	#N/A	#N/A	SLC38A9	#N/A	#N/A	#N/A	#N/A	#N/A	#N/A	#N/A	SLC38A9	#N/A		DERL2		GAL3ST1	MPO	CHCHD2P9	BRS3	STEAP1		BCL6
sp|Q6P1K1|HRG1_HUMAN	SLC48A1	HRG1_HUMAN Heme transporter HRG1	2	1633.54	1726.35	1679.94	1341.37	866.825	1104.1	0.657222	-0.605546	1257.87	804.312	1031.09	0.613765	-0.704242	921.833	990.946	956.389	0.569298	-0.812744	1249.13	1656.76	1452.95	0.864877	-0.209434	#N/A	#N/A	#N/A	SLC48A1	#N/A	#N/A	#N/A	#N/A	#N/A	#N/A	#N/A	#N/A	#N/A		DERL3		GAL3ST2	NAAA	CHCHD4	BSG	STEAP3		BCL6B
sp|P17405|ASM_HUMAN	SMPD1	ASM_HUMAN Sphingomyelin phosphodiesterase	12	2410.89	2968.42	2689.65	1866.61	1744.27	1805.44	0.671253	-0.575071	1875.93	1588.48	1732.2	0.644025	-0.634811	1867.46	2019.4	1943.43	0.722557	-0.468816	1746.79	2353.84	2050.32	0.762297	-0.391576	#N/A	#N/A	#N/A	SMPD1	#N/A	#N/A	#N/A	#N/A	#N/A	#N/A	#N/A	#N/A	#N/A		DGAT1		GAL3ST3	NAGA	CHCHD5	BST1	STX7		BCL9
sp|Q13488|VPP3_HUMAN	TCIRG1	VPP3_HUMAN V-type proton ATPase 116 kDa subunit a isoform 3	44	13083.5	14301.1	13692.3	11399.6	10827	11113.3	0.811646	-0.301078	11604.3	9838.57	10721.4	0.783027	-0.352867	10569.1	12212.3	11390.7	0.831906	-0.265508	10406.9	12920.6	11663.8	0.851847	-0.231333	#N/A	#N/A	#N/A	TCIRG1	#N/A	#N/A	#N/A	#N/A	#N/A	#N/A	#N/A	TCIRG1	#N/A		DGAT2		GAL3ST4	NAGLU	CHCHD6	BTLA	SYT5		BCL9L
sp|Q9NUM4|T106B_HUMAN	TMEM106B	T106B_HUMAN Transmembrane protein 106B	13	5227.72	5756.76	5492.24	3635.97	3770.03	3703	0.674224	-0.5687	3978.85	3427.29	3703.07	0.674237	-0.568673	3860.04	4155.3	4007.67	0.729697	-0.454631	3594.17	5074.93	4334.55	0.789214	-0.341512	#N/A	#N/A	#N/A	TMEM106B	#N/A	#N/A	#N/A	#N/A	#N/A	#N/A	#N/A	#N/A	#N/A		DGAT2L6		GALNT1	NEU1	CHCHD7	BTN3A1	TBC1D12		BCOR
sp|Q8IY95|TM192_HUMAN	TMEM192	TM192_HUMAN Transmembrane protein 192	1	139.022	149.119	144.07	122.45	107.345	114.898	0.797509	-0.326428	124.377	125.255	124.816	0.866354	-0.206972	120.281	118.08	119.18	0.827237	-0.273627	117.262	169.002	143.132	0.993486	-0.00942871	#N/A	#N/A	#N/A	TMEM192	#N/A	#N/A	#N/A	#N/A	#N/A	#N/A	#N/A	#N/A	#N/A		DHCR7		GALNT10	NEU4	CHDH	BTN3A2	TBC1D5		BCORL1
sp|Q86T03-2|TM55B_HUMAN	TMEM55B	TM55B_HUMAN Isoform 2 of Type 1 phosphatidylinositol 4,5-bisphosphate 4-phosphatase	14	2144.66	2293.17	2218.91	2089.12	1896.38	1992.75	0.898074	-0.155094	1905.95	1559.18	1732.57	0.780816	-0.356945	1568.64	1946.67	1757.66	0.792124	-0.336202	1547.51	1523.36	1535.43	0.691976	-0.531207	#N/A	#N/A	#N/A	TMEM55B	#N/A	#N/A	#N/A	#N/A	#N/A	#N/A	#N/A	#N/A	#N/A		DHDDS		GALNT11	NPC1	CISD1	BTN3A3	TMEM108		BDP1
sp|O94886|TM63A_HUMAN	TMEM63A	TM63A_HUMAN Transmembrane protein 63A	7	782.393	911.257	846.825	872.142	862.035	867.089	1.02393	0.0341154	950.036	812.312	881.174	1.04056	0.0573631	761.7	754.653	758.177	0.895317	-0.15953	594.397	834.469	714.433	0.843661	-0.245265	#N/A	#N/A	#N/A	TMEM63A	#N/A	#N/A	#N/A	#N/A	#N/A	#N/A	#N/A	#N/A	#N/A		DHRS7B		GALNT12	NPC2	CISD3	C2orf88	TMEM163		BEND3
sp|Q9ULQ1-3|TPC1_HUMAN	TPCN1	TPC1_HUMAN Isoform 3 of Two pore calcium channel protein 1	19	4120.04	4530.46	4325.25	4289.74	4417.11	4353.42	1.00651	0.00936735	4240.52	3615.14	3927.83	0.908116	-0.139051	3986.6	4151.36	4068.98	0.94075	-0.0881163	3694.21	5003.89	4349.05	1.0055	0.00791677	#N/A	#N/A	#N/A	TPCN1	#N/A	#N/A	#N/A	#N/A	#N/A	#N/A	#N/A	#N/A	#N/A		DHRS9		GALNT13	NPRL2	CKMT1A	C3AR1	VAC14		BEND6
sp|Q8NHX9|TPC2_HUMAN	TPCN2	TPC2_HUMAN Two pore calcium channel protein 2	5	1048.05	1107.57	1077.81	830.962	865.624	848.293	0.787052	-0.345468	1019.4	872.847	946.123	0.87782	-0.188002	860.624	1013.15	936.887	0.869251	-0.202156	871.749	963.96	917.855	0.851592	-0.231765	#N/A	#N/A	#N/A	TPCN2	#N/A	#N/A	#N/A	#N/A	#N/A	#N/A	#N/A	#N/A	#N/A		DIO1		GALNT14	NPRL3	CKMT2	C5AR2	VIPAS39		BHLHA15
sp|O14773|TPP1_HUMAN	TPP1	TPP1_HUMAN Tripeptidyl-peptidase 1	38	12470.2	13456.2	12963.2	8655.27	8460.49	8557.88	0.660167	-0.599097	8882.16	7865.18	8373.67	0.645957	-0.63049	9461.22	10050	9755.61	0.752562	-0.410118	8569.86	12411.3	10490.6	0.809259	-0.305327	#N/A	#N/A	#N/A	TPP1	#N/A	#N/A	#N/A	#N/A	#N/A	#N/A	#N/A	#N/A	#N/A		DIPK1A		GALNT15	OSTM1	CLPB	CA12	VPS11		BHLHE22
sp|O60637|TSN3_HUMAN	TSPAN3	TSN3_HUMAN Tetraspanin-3	5	854.416	1000.26	927.338	779.955	670.715	725.335	0.782169	-0.354448	775.231	584.095	679.663	0.732918	-0.448276	818.407	961.259	889.833	0.959556	-0.0595607	822.227	875.149	848.688	0.915187	-0.127861	#N/A	#N/A	#N/A	TSPAN3	#N/A	#N/A	#N/A	#N/A	#N/A	#N/A	#N/A	#N/A	#N/A		DIPK1B		GALNT16	PCYOX1	CLPP	CA4	VPS16		BHLHE23
sp|O43657|TSN6_HUMAN	TSPAN6	TSN6_HUMAN Tetraspanin-6	4	554.734	609.393	582.063	729.829	671.197	700.513	1.2035	0.267235	715.788	616.3	666.044	1.14428	0.194441	562.808	727.211	645.01	1.10814	0.148144	585.044	648.008	616.526	1.05921	0.0829852	#N/A	#N/A	#N/A	TSPAN6	#N/A	#N/A	#N/A	#N/A	#N/A	#N/A	#N/A	#N/A	#N/A		DIPK1C		GALNT17	PLA2G15	CLPX	CACNA1A	VPS18		BHLHE41
sp|P52594-4|AGFG1_HUMAN	AGFG1	AGFG1_HUMAN Isoform 4 of Arf-GAP domain and FG repeat-containing protein 1	4	784.191	719.157	751.674	430.03	466.679	448.354	0.596475	-0.745467	565.349	566.358	565.853	0.752791	-0.409679	631.121	511.915	571.518	0.760327	-0.395308	469.578	677.439	573.508	0.762975	-0.390292	#N/A	#N/A	#N/A	#N/A	#N/A	#N/A	#N/A	#N/A	#N/A	#N/A	#N/A	#N/A	#N/A		DNAJB11		GALNT18	PLBD1	CLYBL	CACNA1H	VPS26A		BHMG1
sp|O95081|AGFG2_HUMAN	AGFG2	AGFG2_HUMAN Arf-GAP domain and FG repeat-containing protein 2	1	115.7	108.723	112.212	99.4522	86.2584	92.8553	0.827503	-0.273164	113.654	104.72	109.187	0.973046	-0.0394194	103.097	101.039	102.068	0.909604	-0.13669	84.1205	88.5641	86.3423	0.76946	-0.378081	#N/A	#N/A	#N/A	#N/A	#N/A	#N/A	#N/A	#N/A	#N/A	#N/A	#N/A	#N/A	#N/A		DNAJB9		GALNT2	PLBD2	CMC1	CACNA1S	VPS26B		BLM
sp|Q9P2R3-4|ANFY1_HUMAN	ANKFY1	ANFY1_HUMAN Isoform 4 of Ankyrin repeat and FYVE domain-containing protein 1	5	1775.97	2165.32	1970.64	1414.62	1322.86	1368.74	0.694564	-0.525819	1567.78	1322.73	1445.26	0.733392	-0.447344	1758.86	1890.14	1824.5	0.925839	-0.111167	1422.9	2056.54	1739.72	0.882818	-0.179813	#N/A	#N/A	#N/A	#N/A	#N/A	#N/A	ANKFY1	#N/A	#N/A	#N/A	#N/A	#N/A	#N/A		DNAJC10		GALNT3	PPT1	CMC2	CACNG1	VPS26C		BMP2K
sp|Q9ULJ7|ANR50_HUMAN	ANKRD50	ANR50_HUMAN Ankyrin repeat domain-containing protein 50	2	187.275	219.944	203.609	242.034	210.709	226.371	1.11179	0.152887	215.661	220.006	217.834	1.06986	0.097421	229.286	230.198	229.742	1.12835	0.17421	254.155	258.555	256.355	1.25905	0.332338	#N/A	#N/A	#N/A	#N/A	#N/A	#N/A	ANKRD50	#N/A	#N/A	#N/A	#N/A	#N/A	#N/A		DNAJC14		GALNT4	PPT2	CMC4	CACNG4	VPS29		BMS1
sp|P08758|ANXA5_HUMAN	ANXA5	ANXA5_HUMAN Annexin A5	18	5241.62	4116.25	4678.93	6381.35	6325.5	6353.43	1.35788	0.441354	6099.62	6563.8	6331.71	1.35324	0.436415	6051.52	6507.83	6279.68	1.34212	0.42451	5272.54	3709.69	4491.11	0.959858	-0.0591065	#N/A	#N/A	#N/A	#N/A	#N/A	#N/A	#N/A	#N/A	#N/A	#N/A	#N/A	#N/A	#N/A		DNAJC3		GALNT5	PRCP	CMPK2	CACNG5	VPS33A		BNC2
sp|Q10567|AP1B1_HUMAN	AP1B1	AP1B1_HUMAN AP-1 complex subunit beta-1	17	3889.32	4041.68	3965.5	3607.44	3550.43	3578.93	0.902518	-0.147972	3614.76	3308.83	3461.8	0.872978	-0.195982	3478.53	3739.28	3608.91	0.910076	-0.135942	3161.3	3496.39	3328.85	0.839452	-0.252481	#N/A	#N/A	#N/A	#N/A	#N/A	#N/A	#N/A	#N/A	#N/A	#N/A	#N/A	#N/A	#N/A		DNASE1L1		GALNT6	PSAP	COA1	CACNG6	VPS33B		BOP1
sp|O43747-2|AP1G1_HUMAN	AP1G1	AP1G1_HUMAN Isoform 2 of AP-1 complex subunit gamma-1	20	2133.07	2601.72	2367.39	2058.3	2062.92	2060.61	0.870412	-0.200229	2214.01	1867.41	2040.71	0.862007	-0.214229	1913.69	2283.22	2098.45	0.886398	-0.173973	1808.92	2438.06	2123.49	0.896973	-0.156863	#N/A	#N/A	#N/A	#N/A	#N/A	#N/A	#N/A	#N/A	#N/A	#N/A	#N/A	#N/A	#N/A		DOLK		GALNT7	RNF152	COA3	CACNG7	VPS35		BRD1
sp|Q9BXS5-2|AP1M1_HUMAN	AP1M1	AP1M1_HUMAN Isoform 2 of AP-1 complex subunit mu-1	20	5196.21	5238.27	5217.24	4931.82	4968.06	4949.94	0.948766	-0.0758758	5088.93	4588	4838.47	0.927399	-0.108737	4621.55	5002.11	4811.83	0.922294	-0.116701	4352.73	4650.3	4501.51	0.862815	-0.212876	#N/A	#N/A	#N/A	#N/A	#N/A	#N/A	#N/A	#N/A	#N/A	#N/A	#N/A	#N/A	#N/A		DOLPP1		GALNT8	RPTOR	COA4	CACNG8	VPS35L		BRD2
sp|P61966|AP1S1_HUMAN	AP1S1	AP1S1_HUMAN AP-1 complex subunit sigma-1A	2	395.01	396.189	395.6	409.937	407.734	408.836	1.03346	0.0474799	387.533	361.088	374.311	0.946185	-0.0798051	372.121	419.452	395.786	1.00047	0.000681801	334.889	294.948	314.918	0.796054	-0.329062	#N/A	#N/A	#N/A	#N/A	#N/A	#N/A	#N/A	#N/A	#N/A	#N/A	#N/A	#N/A	#N/A		DPAGT1		GALNT9	RRAGA	COA6	CADM1	VPS37B		BRD3
sp|P56377|AP1S2_HUMAN	AP1S2	AP1S2_HUMAN AP-1 complex subunit sigma-2	2	451.049	409.071	430.06	481.436	488.118	484.777	1.12723	0.172783	467.75	419.449	443.6	1.03148	0.0447198	445.131	458.035	451.583	1.05005	0.0704532	371.965	354.05	363.007	0.844086	-0.244539	#N/A	#N/A	#N/A	#N/A	#N/A	#N/A	#N/A	#N/A	#N/A	#N/A	#N/A	#N/A	#N/A		DPM1		GALNTL6	RRAGB	COA7	CADM2	VPS37C		BRD4
sp|Q96PC3-2|AP1S3_HUMAN	AP1S3	AP1S3_HUMAN Isoform 2 of AP-1 complex subunit sigma-3	4	785.171	827.267	806.219	647.309	626.327	636.818	0.789882	-0.340291	615.025	609.197	612.111	0.759237	-0.397378	666.505	751.638	709.072	0.879502	-0.185241	594.28	746.836	670.558	0.831732	-0.26581	#N/A	#N/A	#N/A	#N/A	#N/A	#N/A	#N/A	#N/A	#N/A	#N/A	#N/A	#N/A	#N/A		DPM2		GANAB	RRAGC	COA8	CADM3	VPS37D		BRD7
sp|O95782|AP2A1_HUMAN	AP2A1	AP2A1_HUMAN AP-2 complex subunit alpha-1	10	1271.91	1261.68	1266.8	1179.77	1213.87	1196.82	0.944762	-0.0819769	1247.24	1359.45	1303.35	1.02885	0.0410359	1284.59	1380.6	1332.59	1.05194	0.0730553	1279.53	1338.52	1309.03	1.03334	0.0473096	#N/A	#N/A	#N/A	#N/A	#N/A	#N/A	#N/A	#N/A	#N/A	#N/A	#N/A	#N/A	#N/A		DPM3		GASK1B	RRAGD	COASY	CALCR	VPS39		BRD8
sp|O94973-2|AP2A2_HUMAN	AP2A2	AP2A2_HUMAN Isoform 2 of AP-2 complex subunit alpha-2	2	99.0508	124.766	111.908	108.51	116.501	112.506	1.00534	0.0076772	118.338	111.923	115.13	1.02879	0.0409517	115.303	107.059	111.181	0.9935	-0.00940807	106.244	116.093	111.168	0.993388	-0.00957028	#N/A	#N/A	#N/A	#N/A	#N/A	#N/A	#N/A	#N/A	#N/A	#N/A	#N/A	#N/A	#N/A		DUOXA2		GBF1	SCARB2	COQ10A	CALCRL	VPS41		BRDT
sp|P63010-2|AP2B1_HUMAN	AP2B1	AP2B1_HUMAN Isoform 2 of AP-2 complex subunit beta	27	6987.84	7119.18	7053.51	6788.56	6678.65	6733.6	0.954646	-0.0669623	7114.17	6542.21	6828.19	0.968056	-0.0468382	6799.17	7289.43	7044.3	0.998694	-0.00188501	6272.49	6613.98	6443.23	0.913479	-0.130556	#N/A	#N/A	#N/A	#N/A	#N/A	#N/A	#N/A	#N/A	#N/A	#N/A	#N/A	#N/A	#N/A		EBPL		GBGT1	SCPEP1	COQ10B	CAP1	VPS4A		BRF1
sp|Q96CW1|AP2M1_HUMAN	AP2M1	AP2M1_HUMAN AP-2 complex subunit mu	5	1201.15	1064.16	1132.66	1157.67	1300.17	1228.92	1.08499	0.117683	1343.28	1349.22	1346.25	1.18858	0.249238	1278.61	1463.51	1371.06	1.21048	0.275583	1295.39	1115.15	1205.27	1.06411	0.0896479	#N/A	#N/A	#N/A	#N/A	#N/A	#N/A	#N/A	#N/A	#N/A	#N/A	#N/A	#N/A	#N/A		EDEM1		GCC1	SGSH	COQ2	CAP2	VPS4B		BRF2
sp|P53680|AP2S1_HUMAN	AP2S1	AP2S1_HUMAN AP-2 complex subunit sigma	4	426.218	433.522	429.87	438.442	424.383	431.413	1.00359	0.00516755	441.663	434.428	438.046	1.01902	0.0271803	453.231	492.403	472.817	1.09991	0.137381	407.243	397.862	402.553	0.936452	-0.0947235	#N/A	#N/A	#N/A	#N/A	#N/A	#N/A	#N/A	#N/A	#N/A	#N/A	#N/A	#N/A	#N/A		EDEM2		GCC2	SIAE	COQ3	CASR	VPS50		BRIX1
sp|O00203|AP3B1_HUMAN	AP3B1	AP3B1_HUMAN AP-3 complex subunit beta-1	15	3700.1	3956.61	3828.36	2402.18	2332.22	2367.2	0.618333	-0.693543	2886.39	2823.85	2855.12	0.745782	-0.423173	2818.95	2880.74	2849.84	0.744405	-0.425841	2384.84	3383.6	2884.22	0.753384	-0.408543	#N/A	#N/A	#N/A	#N/A	#N/A	#N/A	#N/A	#N/A	#N/A	#N/A	#N/A	#N/A	#N/A		EDEM3		GCNT1	SLC11A1	COQ4	CATSPER1	VPS8		BRMS1L
sp|O14617-5|AP3D1_HUMAN	AP3D1	AP3D1_HUMAN Isoform 5 of AP-3 complex subunit delta-1	5	633.206	604.879	619.043	515.378	497.78	506.579	0.818327	-0.289251	569.077	577.864	573.471	0.926383	-0.110319	532.029	555.255	543.642	0.878198	-0.187382	509.292	558.99	534.141	0.86285	-0.212818	#N/A	#N/A	#N/A	#N/A	#N/A	#N/A	#N/A	#N/A	#N/A	#N/A	#N/A	#N/A	#N/A		EIF2AK3		GCNT2	SLC15A3	COQ5	CATSPER2	VTA1		BSX
sp|Q9Y2T2|AP3M1_HUMAN	AP3M1	AP3M1_HUMAN AP-3 complex subunit mu-1	8	1097.78	1113.89	1105.84	799.046	712.621	755.833	0.683496	-0.548996	917.482	884.109	900.795	0.814584	-0.295865	800.659	820.063	810.361	0.732805	-0.448499	660.157	869.084	764.62	0.691442	-0.53232	#N/A	#N/A	#N/A	#N/A	#N/A	#N/A	#N/A	#N/A	#N/A	#N/A	#N/A	#N/A	#N/A		ELOVL1		GCNT3	SLC15A4	COQ6	CATSPER3	VTI1B		BTAF1
sp|Q92572|AP3S1_HUMAN	AP3S1	AP3S1_HUMAN AP-3 complex subunit sigma-1	5	2179.22	2292.57	2235.89	1430.4	1380.72	1405.56	0.628634	-0.669707	1610.33	1521.58	1565.95	0.700371	-0.51381	1658.75	1637.34	1648.05	0.737085	-0.440097	1309.77	1722.09	1515.93	0.677997	-0.560649	#N/A	#N/A	#N/A	#N/A	#N/A	#N/A	#N/A	#N/A	#N/A	#N/A	#N/A	#N/A	#N/A		ELOVL2		GCNT4	SLC17A5	COQ7	CATSPER4	WASH2P		BTBD18
sp|P61204|ARF3_HUMAN	ARF3	ARF3_HUMAN ADP-ribosylation factor 3	33	13329.1	13499.1	13414.1	9345.13	9931.08	9638.1	0.718506	-0.476929	12201	10331.5	11266.2	0.839881	-0.251743	10099.4	10293.5	10196.5	0.760129	-0.395683	8785.76	10887	9836.38	0.733287	-0.447551	#N/A	#N/A	#N/A	#N/A	#N/A	#N/A	#N/A	#N/A	#N/A	#N/A	#N/A	#N/A	#N/A		ELOVL3		GCNT7	SLC26A11	COQ8A	CATSPERD	WASH3P		BTBD7
sp|P18085|ARF4_HUMAN	ARF4	ARF4_HUMAN ADP-ribosylation factor 4	22	7662.98	7413.14	7538.06	6299.72	6315.13	6307.43	0.836744	-0.257142	7462.05	6475.31	6968.68	0.924466	-0.113308	6559.57	6442.85	6501.21	0.862451	-0.213485	5500.39	6851.78	6176.09	0.81932	-0.287501	#N/A	#N/A	ARF4	#N/A	#N/A	#N/A	#N/A	#N/A	#N/A	#N/A	#N/A	#N/A	#N/A		ELOVL4		GFY	SLC29A3	COQ9	CATSPERE	WASH4P		BTBD8
sp|P84085|ARF5_HUMAN	ARF5	ARF5_HUMAN ADP-ribosylation factor 5	9	1866.21	1625.01	1745.61	1552.03	1612.23	1582.13	0.906348	-0.141863	1891.65	1675.22	1783.43	1.02167	0.0309274	1584.6	1593.19	1588.89	0.910223	-0.135707	1328.41	1443.93	1386.17	0.794089	-0.332627	#N/A	#N/A	#N/A	#N/A	#N/A	#N/A	#N/A	#N/A	#N/A	#N/A	#N/A	#N/A	#N/A		ELOVL5		GGA1	SLC2A6	COX10	CATSPERZ	WASH6P		BUB1
sp|P62330|ARF6_HUMAN	ARF6	ARF6_HUMAN ADP-ribosylation factor 6	13	4038.78	3980.69	4009.74	3132.63	3275.23	3203.93	0.799038	-0.323664	3188.45	3072.9	3130.68	0.780769	-0.357033	3115.7	3080.94	3098.32	0.772699	-0.372021	2804.2	2776.95	2790.57	0.69595	-0.522944	#N/A	#N/A	#N/A	#N/A	#N/A	#N/A	#N/A	#N/A	#N/A	#N/A	#N/A	#N/A	#N/A		ELOVL6		GGA2	SLC30A2	COX11	CCKAR	WASHC1		BUB3
sp|Q8N6T3|ARFG1_HUMAN	ARFGAP1	ARFG1_HUMAN ADP-ribosylation factor GTPase-activating protein 1	17	6983.82	3946.59	5465.2	5113.2	4671.56	4892.38	0.895187	-0.159739	4898.54	4755.31	4826.93	0.88321	-0.179171	5828.43	4639.6	5234.02	0.957698	-0.0623576	2486.76	4965.21	3725.99	0.681765	-0.552654	#N/A	#N/A	#N/A	#N/A	#N/A	#N/A	#N/A	#N/A	#N/A	#N/A	#N/A	#N/A	#N/A		ELOVL7		GGA3	SLC36A1	COX14	CCKBR	WASHC2A		BUD13
sp|Q8N6H7|ARFG2_HUMAN	ARFGAP2	ARFG2_HUMAN ADP-ribosylation factor GTPase-activating protein 2	25	3938.79	3514.55	3726.67	2847.36	2811.21	2829.28	0.759199	-0.39745	3614.58	3189.44	3402.01	0.912882	-0.1315	3111.96	2671.85	2891.9	0.776002	-0.365867	2200.93	3292.21	2746.57	0.737004	-0.440256	#N/A	#N/A	#N/A	#N/A	#N/A	#N/A	#N/A	#N/A	#N/A	#N/A	#N/A	#N/A	#N/A		EOGT		GGTA1P	SLC38A7	COX15	CCR1	WASHC2C		BUD31
tr|H0Y6A0|H0Y6A0_HUMAN	ARFGAP3	H0Y6A0_HUMAN ADP-ribosylation factor GTPase-activating protein 3 (Fragment)	1	121.278	99.451	110.364	79.8302	85.118	82.4741	0.747288	-0.420263	92.21	93.7529	92.9814	0.842494	-0.247261	94.2309	92.0989	93.1649	0.844156	-0.244418	80.0637	69.8039	74.9338	0.678967	-0.558588	#N/A	#N/A	#N/A	#N/A	#N/A	#N/A	#N/A	#N/A	#N/A	#N/A	#N/A	#N/A	#N/A		EPHX1		GKAP1	SLC38A9	COX16	CCR10	WASHC3		C11orf1
sp|Q9NP61|ARFG3_HUMAN	ARFGAP3	ARFG3_HUMAN ADP-ribosylation factor GTPase-activating protein 3	19	3220.1	2772.58	2996.34	2394.66	2350.03	2372.35	0.791748	-0.336888	2861.34	2716.53	2788.94	0.930781	-0.103487	2686.26	2436.32	2561.29	0.854806	-0.226331	1965.86	2406.2	2186.03	0.729567	-0.454888	#N/A	#N/A	#N/A	#N/A	#N/A	#N/A	#N/A	#N/A	#N/A	#N/A	#N/A	#N/A	#N/A		EPHX3		GLCE	SLC44A2	COX17	CCR2	WASHC4		C11orf54
sp|P53367|ARFP1_HUMAN	ARFIP1	ARFP1_HUMAN Arfaptin-1	9	1079.07	1116.92	1097.99	1068.39	995.523	1031.96	0.939855	-0.0894893	1106.98	1127.37	1117.17	1.01747	0.0249837	1114.83	1058.85	1086.84	0.989841	-0.0147319	1065.85	1139.3	1102.57	1.00417	0.00600531	#N/A	#N/A	ARFIP1	#N/A	#N/A	#N/A	#N/A	#N/A	#N/A	#N/A	#N/A	#N/A	#N/A		EPM2AIP1		GLG1	SLC48A1	COX18	CCR3	WASHC5		C1orf174
sp|P53365|ARFP2_HUMAN	ARFIP2	ARFP2_HUMAN Arfaptin-2	2	238.659	216.926	227.792	268.268	256.136	262.202	1.15106	0.202958	262.413	258.777	260.595	1.144	0.194089	246.258	265.212	255.735	1.12267	0.166929	217.462	194.114	205.788	0.903401	-0.146561	#N/A	#N/A	ARFIP2	#N/A	#N/A	#N/A	#N/A	#N/A	#N/A	#N/A	#N/A	#N/A	#N/A		ERAP1		GLIPR2	SLC49A4	COX20	CCR4	WDFY1		C1orf61
sp|Q9NWB6|ARGL1_HUMAN	ARGLU1	ARGL1_HUMAN Arginine and glutamate-rich protein 1	6	1441.11	1332.65	1386.88	1293.27	1197.68	1245.47	0.898041	-0.155147	1147.73	2184.38	1666.06	1.2013	0.264593	1376.95	1236.01	1306.48	0.942028	-0.0861579	1341.42	1547.82	1444.62	1.04163	0.0588471	#N/A	#N/A	#N/A	#N/A	#N/A	#N/A	#N/A	#N/A	ARGLU1	#N/A	#N/A	#N/A	#N/A		ERAP2		GNPNAT1	SLC66A1	COX4I1	CCR5	WDFY2		C2CD4A
sp|Q07960|RHG01_HUMAN	ARHGAP1	RHG01_HUMAN Rho GTPase-activating protein 1	6	627.373	681.732	654.553	653.151	644.955	649.053	0.991598	-0.0121726	670.028	657.924	663.976	1.0144	0.0206222	676.656	658.769	667.712	1.02011	0.0287181	536.926	641.31	589.118	0.900032	-0.151952	#N/A	#N/A	#N/A	#N/A	#N/A	#N/A	#N/A	#N/A	#N/A	ARHGAP1	#N/A	#N/A	#N/A		ERG28		GNPTAB	SLC7A14	COX4I2	CCR6	WDR81		C2CD4B
sp|Q8N392|RHG18_HUMAN	ARHGAP18	RHG18_HUMAN Rho GTPase-activating protein 18	2	202.313	236.455	219.384	181.469	153.746	167.608	0.763991	-0.388372	179.181	186.288	182.735	0.832944	-0.263709	195.974	174.54	185.257	0.844442	-0.24393	164.884	225.613	195.248	0.889985	-0.168147	#N/A	#N/A	#N/A	#N/A	#N/A	#N/A	#N/A	#N/A	#N/A	ARHGAP18	#N/A	#N/A	#N/A		ERLEC1		GNPTG	SMPD1	COX5A	CCR7	WDR91		CABIN1
sp|P52565|GDIR1_HUMAN	ARHGDIA	GDIR1_HUMAN Rho GDP-dissociation inhibitor 1	6	596.427	573.942	585.185	656.79	670.281	663.535	1.13389	0.181282	677.632	805.578	741.605	1.2673	0.341759	666.89	633.478	650.184	1.11108	0.151956	527.3	511.995	519.648	0.888006	-0.171358	#N/A	#N/A	#N/A	#N/A	#N/A	#N/A	#N/A	#N/A	#N/A	ARHGDIA	#N/A	#N/A	#N/A		ERLIN1		GOLGA1	SZT2	COX5B	CCR8	ZFYVE16		CACTIN
sp|Q92888-3|ARHG1_HUMAN	ARHGEF1	ARHG1_HUMAN Isoform 3 of Rho guanine nucleotide exchange factor 1	3	103.068	123.899	113.483	111.418	108.517	109.968	0.969018	-0.0454053	130.109	122.833	126.471	1.11444	0.156324	103.935	116.711	110.323	0.97215	-0.040749	116.931	126.598	121.764	1.07297	0.101611	#N/A	#N/A	#N/A	#N/A	#N/A	#N/A	#N/A	#N/A	#N/A	#N/A	#N/A	#N/A	#N/A		ERLIN2		GOLGA2	TCIRG1	COX6A1	CCR9	ZFYVE21		CAMTA2
sp|Q92974|ARHG2_HUMAN	ARHGEF2	ARHG2_HUMAN Rho guanine nucleotide exchange factor 2	2	251.889	243.965	247.927	212.951	203.334	208.142	0.839531	-0.252344	250.279	252.327	251.303	1.01362	0.0195125	214.77	214.377	214.574	0.86547	-0.208443	212.243	265.484	238.863	0.963443	-0.053729	#N/A	#N/A	#N/A	#N/A	#N/A	#N/A	#N/A	#N/A	#N/A	#N/A	#N/A	#N/A	#N/A		ERMARD		GOLGA3	TM6SF1	COX6A2	CCRL2	ZFYVE9		CAND2
sp|Q8TER5|ARH40_HUMAN	ARHGEF40	ARH40_HUMAN Rho guanine nucleotide exchange factor 40	1	197.016	173.199	185.108	140.761	149.351	145.056	0.783631	-0.351753	153.365	147.737	150.551	0.813317	-0.298111	164.734	169.102	166.918	0.901735	-0.149224	166.356	180.443	173.399	0.93675	-0.0942636	#N/A	#N/A	#N/A	#N/A	#N/A	#N/A	#N/A	#N/A	#N/A	#N/A	#N/A	#N/A	#N/A		ERMP1		GOLGA4	TMEM106B	COX6B1	CD109			CAPN7
sp|Q14155|ARHG7_HUMAN	ARHGEF7	ARHG7_HUMAN Rho guanine nucleotide exchange factor 7	5	467.372	435.057	451.215	377.237	398.89	388.063	0.860042	-0.217521	424.59	479.549	452.069	1.00189	0.00273116	483.322	409.046	446.184	0.988851	-0.0161747	353.201	423.519	388.36	0.860699	-0.216419	#N/A	#N/A	#N/A	#N/A	#N/A	#N/A	#N/A	#N/A	#N/A	#N/A	#N/A	#N/A	#N/A		ERN1		GOLGA5	TMEM175	COX6B2	CD180			CARF
sp|P40616|ARL1_HUMAN	ARL1	ARL1_HUMAN ADP-ribosylation factor-like protein 1	23	3924.72	3476.41	3700.56	3982.52	3956.85	3969.68	1.07272	0.101279	4404.51	3727.21	4065.86	1.09871	0.135815	4075.13	4178.71	4126.92	1.11521	0.15732	3187.4	3988.19	3587.8	0.969526	-0.0446481	#N/A	#N/A	#N/A	#N/A	#N/A	#N/A	#N/A	#N/A	#N/A	#N/A	#N/A	#N/A	#N/A		ERN2		GOLGA7	TMEM192	COX6C	CD19			CASZ1
sp|Q3SXY8|AR13B_HUMAN	ARL13B	AR13B_HUMAN ADP-ribosylation factor-like protein 13B	3	787.822	614.478	701.15	757.156	778.952	768.054	1.09542	0.131485	875.119	769.285	822.202	1.17265	0.22977	801.534	814.728	808.131	1.15258	0.204866	709.2	327.44	518.32	0.739243	-0.43588	#N/A	#N/A	#N/A	#N/A	#N/A	ARL13B	#N/A	#N/A	#N/A	#N/A	#N/A	#N/A	#N/A		ERO1A		GOLGA7B	TMEM55B	COX7A1	CD2			CBFA2T2
sp|Q9NXU5|ARL15_HUMAN	ARL15	ARL15_HUMAN ADP-ribosylation factor-like protein 15	1	34.2384	49.8362	42.0373	43.4538	38.7038	41.0788	0.977199	-0.033276	38.658	42.5835	40.6208	0.966303	-0.0494531	37.6732	35.2461	36.4596	0.867317	-0.205369	35.2267	34.9707	35.0987	0.834942	-0.260252	#N/A	#N/A	#N/A	#N/A	#N/A	#N/A	#N/A	#N/A	#N/A	#N/A	#N/A	#N/A	#N/A		ERO1B		GOLGA8A	TMEM63A	COX7A2	CD200			CBFB
sp|Q96KC2|ARL5B_HUMAN	ARL5B	ARL5B_HUMAN ADP-ribosylation factor-like protein 5B	1	172.038	166.846	169.442	209.502	217.422	213.462	1.25979	0.333188	226.259	196.968	211.613	1.24888	0.32064	202.881	214.089	208.485	1.23042	0.299152	219.77	250.501	235.136	1.3877	0.472701	#N/A	#N/A	#N/A	#N/A	#N/A	#N/A	#N/A	#N/A	#N/A	#N/A	#N/A	#N/A	#N/A		ERP27		GOLGA8B	TPCN1	COX7A2L	CD22			CBX1
sp|Q9H0F7-2|ARL6_HUMAN	ARL6	ARL6_HUMAN Isoform 2 of ADP-ribosylation factor-like protein 6	2	267.75	261.07	264.41	202.376	219.994	211.185	0.798703	-0.324269	231.185	241.464	236.325	0.89378	-0.162008	241.664	227.144	234.404	0.886517	-0.17378	193.314	179.811	186.562	0.70558	-0.503118	#N/A	#N/A	#N/A	#N/A	#N/A	#N/A	#N/A	#N/A	#N/A	#N/A	#N/A	#N/A	#N/A		ERP29		GOLGA8IP	TPCN2	COX7A2P2	CD226			CBX2
sp|Q15041|AR6P1_HUMAN	ARL6IP1	AR6P1_HUMAN ADP-ribosylation factor-like protein 6-interacting protein 1	1	40.3957	38.358	39.3768	41.7381	40.1334	40.9357	1.03959	0.0560136	45.0869	33.7902	39.4385	1.00157	0.0022588	39.7764	51.1901	45.4832	1.15508	0.207988	45.9844	35.7876	40.886	1.03833	0.0542592	ARL6IP1	#N/A	#N/A	#N/A	#N/A	#N/A	#N/A	#N/A	#N/A	#N/A	#N/A	#N/A	#N/A		ERP44		GOLGB1	TPP1	COX7B	CD24			CBX3
sp|Q66PJ3|AR6P4_HUMAN	ARL6IP4	AR6P4_HUMAN ADP-ribosylation factor-like protein 6-interacting protein 4	1	31.4921	44.233	37.8625	32.5432	32.7217	32.6324	0.861866	-0.214464	39.2596	39.7015	39.4806	1.04273	0.0603705	37.1155	39.6752	38.3953	1.01407	0.02016	37.2254	40.9744	39.0999	1.03268	0.0463933	#N/A	#N/A	#N/A	#N/A	#N/A	#N/A	#N/A	#N/A	ARL6IP4	#N/A	#N/A	#N/A	#N/A		EXTL1		GOLIM4	TSPAN1	COX7B2	CD244			CBX4
sp|O75915|PRAF3_HUMAN	ARL6IP5	PRAF3_HUMAN PRA1 family protein 3	14	2347.49	2418.4	2382.94	3330.57	2912.49	3121.53	1.30995	0.389508	2691.59	2551.99	2621.79	1.10023	0.137806	2808.15	2719.94	2764.05	1.15993	0.214035	3084	2355.86	2719.93	1.14142	0.190824	#N/A	#N/A	#N/A	#N/A	#N/A	#N/A	#N/A	#N/A	#N/A	#N/A	#N/A	#N/A	#N/A		FA2H		GOLM1	TSPAN3	COX7C	CD300A			CBX5
sp|P78537|BL1S1_HUMAN	BLOC1S1	BL1S1_HUMAN Biogenesis of lysosome-related organelles complex 1 subunit 1	9	1375.47	1359.54	1367.51	976.051	959.494	967.773	0.707692	-0.498806	1220.6	1018.47	1119.53	0.81867	-0.288646	1131.71	1269.87	1200.79	0.878088	-0.187562	1140.3	963.576	1051.94	0.769239	-0.378496	#N/A	#N/A	#N/A	#N/A	#N/A	#N/A	#N/A	#N/A	#N/A	#N/A	#N/A	#N/A	#N/A		FADS2		GOLPH3L	TSPAN6	COX8A	CD300C			CBX6
sp|Q6QNY1|BL1S2_HUMAN	BLOC1S2	BL1S2_HUMAN Biogenesis of lysosome-related organelles complex 1 subunit 2	8	2686.36	2801.01	2743.69	1682.57	1542.04	1612.3	0.587642	-0.76699	2011.53	1719.59	1865.56	0.679947	-0.556506	2026.71	2147.17	2086.94	0.760634	-0.394726	1808.4	1913.59	1860.99	0.678283	-0.560041	#N/A	#N/A	#N/A	#N/A	#N/A	#N/A	#N/A	#N/A	#N/A	#N/A	#N/A	#N/A	#N/A		FADS2P1		GOLT1A	WDR24	COX8C	CD300E			CBX7
sp|Q6QNY0|BL1S3_HUMAN	BLOC1S3	BL1S3_HUMAN Biogenesis of lysosome-related organelles complex 1 subunit 3	1	207.459	215.524	211.492	192.277	155.645	173.961	0.822544	-0.281836	197.853	203.034	200.444	0.947761	-0.077404	183.778	177.05	180.414	0.853056	-0.229288	136.32	178.507	157.413	0.744302	-0.42604	#N/A	#N/A	#N/A	#N/A	#N/A	#N/A	#N/A	#N/A	#N/A	BLOC1S3	#N/A	#N/A	#N/A		FADS3		GOLT1B	WDR59	CPOX	CD300LB			CBX8
sp|Q7Z3J2|CP062_HUMAN	C16orf62	CP062_HUMAN UPF0505 protein C16orf62	2	373.479	404.524	389.001	283.134	286.99	285.062	0.732804	-0.4485	375.565	287.995	331.78	0.852902	-0.229549	343.402	381.072	362.237	0.931197	-0.102842	293.404	421.252	357.328	0.918577	-0.122527	#N/A	#N/A	#N/A	#N/A	#N/A	#N/A	#N/A	#N/A	#N/A	#N/A	#N/A	#N/A	#N/A		FDFT1		GOPC		CPT1A	CD300LD			CC2D1B
sp|O60826|CCD22_HUMAN	CCDC22	CCD22_HUMAN Coiled-coil domain-containing protein 22	6	214.981	195.005	204.993	223.937	195.517	209.727	1.02309	0.032938	215.22	193.02	204.12	0.995741	-0.0061571	215.266	247.151	231.209	1.12788	0.17362	204.497	188.417	196.457	0.95836	-0.0613611	#N/A	#N/A	#N/A	#N/A	#N/A	#N/A	CCDC22	#N/A	#N/A	#N/A	#N/A	#N/A	#N/A		FICD		GORAB		CPT1B	CD300LF			CCDC106
sp|Q9Y3C0|CCD53_HUMAN	CCDC53	CCD53_HUMAN WASH complex subunit CCDC53	1	178.212	177.269	177.74	148.859	133.185	141.022	0.793415	-0.333852	148.749	156.624	152.686	0.859042	-0.2192	169.659	149.533	159.596	0.897916	-0.155348	124.173	144.486	134.329	0.755762	-0.403996	#N/A	#N/A	#N/A	#N/A	#N/A	#N/A	#N/A	#N/A	#N/A	#N/A	#N/A	#N/A	#N/A		FITM1		GORASP1		CPT2	CD320			CCDC110
sp|Q567U6|CCD93_HUMAN	CCDC93	CCD93_HUMAN Coiled-coil domain-containing protein 93	2	62.9328	67.9594	65.4461	59.6829	67.015	63.349	0.967956	-0.0469865	62.7123	54.0196	58.3659	0.891817	-0.16518	64.3792	64.8588	64.619	0.987362	-0.0183488	65.1784	87.9619	76.5701	1.16997	0.226475	#N/A	#N/A	#N/A	#N/A	#N/A	#N/A	CCDC93	#N/A	#N/A	#N/A	#N/A	#N/A	#N/A		FITM2		GORASP2		CRLS1	CD3D			CCDC174
sp|Q9Y6G5|COMDA_HUMAN	COMMD10	COMDA_HUMAN COMM domain-containing protein 10	4	547.915	543.702	545.808	515.514	490.011	502.763	0.921134	-0.118518	573.761	597.549	585.655	1.073	0.101656	574.401	594.145	584.273	1.07047	0.0982478	481.634	497.971	489.803	0.897389	-0.156195	#N/A	#N/A	#N/A	#N/A	#N/A	#N/A	#N/A	#N/A	#N/A	#N/A	#N/A	#N/A	#N/A		FKBP10		GOSR1		CS	CD3E			CCDC59
sp|Q86X83|COMD2_HUMAN	COMMD2	COMD2_HUMAN COMM domain-containing protein 2	1	39.7603	48.4416	44.1009	56.5017	46.1345	51.3181	1.16365	0.218658	54.7495	45.593	50.1713	1.13765	0.186051	41.6947	55.5212	48.608	1.1022	0.140383	48.0947	37.9233	43.009	0.97524	-0.0361711	#N/A	#N/A	#N/A	#N/A	#N/A	#N/A	#N/A	#N/A	#N/A	COMMD2	#N/A	#N/A	#N/A		FKBP14		GOSR2		CSKMT	CD3G			CCDC86
sp|Q9H0A8|COMD4_HUMAN	COMMD4	COMD4_HUMAN COMM domain-containing protein 4	5	375.039	325.297	350.168	329.152	333.802	331.477	0.946623	-0.0791385	395.992	348.735	372.364	1.06339	0.0886644	397.195	395.433	396.314	1.13178	0.178597	297.264	308.656	302.96	0.865185	-0.20892	#N/A	#N/A	#N/A	#N/A	#N/A	#N/A	#N/A	#N/A	#N/A	#N/A	#N/A	#N/A	#N/A		FKBP2		GPR89A		CYB5B	CD44			CCNA1
sp|Q7Z4G1-2|COMD6_HUMAN	COMMD6	COMD6_HUMAN Isoform 2 of COMM domain-containing protein 6	1	141.445	130.32	135.882	133.694	131.321	132.507	0.975162	-0.0362856	153.339	141.518	147.428	1.08497	0.117656	157.017	153.288	155.153	1.14181	0.191327	125.24	123.154	124.197	0.914003	-0.129729	#N/A	#N/A	#N/A	#N/A	#N/A	#N/A	#N/A	#N/A	#N/A	#N/A	#N/A	#N/A	#N/A		FKBP7		GPR89B		CYC1	CD47			CCNB1IP1
sp|P53618|COPB_HUMAN	COPB1	COPB_HUMAN Coatomer subunit beta	24	4284.24	4652.75	4468.49	4484.72	4163.79	4324.26	0.967721	-0.0473374	4458.72	4122.13	4290.43	0.96015	-0.0586684	4326.24	4277.84	4302.04	0.962749	-0.0547681	3943.4	5925.18	4934.29	1.10424	0.143053	#N/A	#N/A	COPB1	#N/A	#N/A	#N/A	#N/A	#N/A	#N/A	#N/A	#N/A	#N/A	#N/A		FKBP9		GSAP		CYCS	CD48			CCNB3
sp|Q9Y678|COPG1_HUMAN	COPG1	COPG1_HUMAN Coatomer subunit gamma-1	27	5549.42	5935.5	5742.46	6106.72	5732.11	5919.41	1.03082	0.0437857	6038.61	5715.04	5876.82	1.0234	0.033368	5752.71	5967.97	5860.34	1.02053	0.0293155	5310.38	6204.2	5757.29	1.00258	0.00372098	#N/A	#N/A	COPG1	#N/A	#N/A	#N/A	#N/A	#N/A	#N/A	#N/A	#N/A	#N/A	#N/A		FLT3		HS2ST1		CYP11A1	CD5			CCNC
sp|P98082|DAB2_HUMAN	DAB2	DAB2_HUMAN Disabled homolog 2	14	2186.69	2005.87	2096.28	1615.02	1736.28	1675.65	0.799345	-0.323111	1947.72	2083.37	2015.55	0.961487	-0.0566614	1894.61	1693.16	1793.88	0.855747	-0.224744	1632.05	1689.93	1660.99	0.792351	-0.335788	#N/A	#N/A	#N/A	#N/A	#N/A	#N/A	#N/A	#N/A	#N/A	#N/A	#N/A	#N/A	#N/A		FMO1		HS3ST1		CYP11B1	CD52			CCNE1
sp|Q13561-2|DCTN2_HUMAN	DCTN2	DCTN2_HUMAN Isoform 2 of Dynactin subunit 2	7	1164.4	1137.01	1150.7	1115.99	1083.49	1099.74	0.95571	-0.0653555	1138.96	1205.29	1172.12	1.01861	0.0266084	1181.51	1167.39	1174.45	1.02064	0.0294673	1039.72	1119.26	1079.49	0.938112	-0.0921681	#N/A	#N/A	#N/A	#N/A	#N/A	#N/A	#N/A	#N/A	#N/A	#N/A	#N/A	#N/A	#N/A		FMO2		HS3ST2		CYP11B2	CD53			CCNE2
tr|R4GN35|R4GN35_HUMAN	DENND4C	R4GN35_HUMAN DENN domain-containing protein 4C	1	57.7991	75.0289	66.414	51.7715	44.5227	48.1471	0.724954	-0.464038	61.4749	54.7901	58.1325	0.875305	-0.192142	68.7847	48.9461	58.8654	0.88634	-0.174067	47.4321	56.1127	51.7724	0.77954	-0.359304	#N/A	#N/A	#N/A	#N/A	#N/A	#N/A	#N/A	#N/A	#N/A	#N/A	#N/A	#N/A	#N/A		FMO3		HS3ST3A1		CYP24A1	CD58			CCNG1
sp|O75190|DNJB6_HUMAN	DNAJB6	DNJB6_HUMAN DnaJ homolog subfamily B member 6	2	147.249	135.474	141.361	103.283	97.4576	100.37	0.710026	-0.494057	107.806	122.46	115.133	0.814458	-0.296088	114.622	80.2323	97.4271	0.689206	-0.536993	88.2812	152.099	120.19	0.850232	-0.234071	#N/A	#N/A	#N/A	#N/A	#N/A	#N/A	#N/A	#N/A	#N/A	#N/A	#N/A	#N/A	#N/A		FMO4		HS3ST3B1		CYP27A1	CD79A			CCNH
sp|O75165|DJC13_HUMAN	DNAJC13	DJC13_HUMAN DnaJ homolog subfamily C member 13	25	3176.58	3653.45	3415.01	3463.35	3353.79	3408.57	0.998113	-0.0027253	3283.96	2969.74	3126.85	0.915618	-0.127182	2897.48	3093.6	2995.54	0.877167	-0.189076	2738.32	3491.27	3114.8	0.912088	-0.132755	#N/A	#N/A	#N/A	#N/A	#N/A	#N/A	DNAJC13	#N/A	#N/A	#N/A	#N/A	#N/A	#N/A		FMO5		HS3ST4		CYP27B1	CD79B			CCNK
sp|Q96DA6|TIM14_HUMAN	DNAJC19	TIM14_HUMAN Mitochondrial import inner membrane translocase subunit TIM14	2	129.123	147.516	138.32	185.525	183.358	184.442	1.33345	0.415159	150.133	165.589	157.861	1.14128	0.19065	183.948	174.043	178.995	1.29407	0.371919	188.869	151.743	170.306	1.23125	0.300125	#N/A	#N/A	#N/A	#N/A	DNAJC19	#N/A	#N/A	#N/A	#N/A	#N/A	#N/A	#N/A	#N/A		FMO6P		HS3ST5		D2HGDH	CD81			CCNL1
sp|Q05193|DYN1_HUMAN	DNM1	DYN1_HUMAN Dynamin-1	1	153.201	162.798	158	149.172	159.131	154.151	0.975645	-0.0355711	153.076	157.47	155.273	0.982744	-0.025113	164.079	173.675	168.877	1.06885	0.0960529	142.642	178.173	160.407	1.01524	0.0218216	#N/A	#N/A	#N/A	#N/A	#N/A	#N/A	#N/A	#N/A	#N/A	#N/A	#N/A	#N/A	#N/A		FOXRED2		HS3ST6		DAP3	CD82			CCNL2
sp|P50570-4|DYN2_HUMAN	DNM2	DYN2_HUMAN Isoform 4 of Dynamin-2	6	1680.6	1680.36	1680.48	1539.92	1537.71	1538.82	0.9157	-0.127054	1736.36	1598.28	1667.32	0.992169	-0.0113424	1652.23	1658.42	1655.33	0.985031	-0.0217589	1415.02	1609.85	1512.43	0.900002	-0.152	#N/A	#N/A	#N/A	#N/A	#N/A	#N/A	#N/A	#N/A	#N/A	#N/A	#N/A	#N/A	#N/A		G6PC		IMPAD1		DARS2	CD84			CCNT1
sp|O14972|DSCR3_HUMAN	DSCR3	DSCR3_HUMAN Down syndrome critical region protein 3	2	259.52	261.708	260.614	203.414	222.832	213.123	0.817773	-0.290228	253.162	238.01	245.586	0.942336	-0.0856863	255.591	297.544	276.567	1.06122	0.085717	203.685	261.011	232.348	0.891541	-0.165627	#N/A	#N/A	#N/A	#N/A	#N/A	#N/A	#N/A	#N/A	#N/A	#N/A	#N/A	#N/A	#N/A		G6PC2		JAKMIP2		DBT	CD86			CD3EAP
sp|Q15075|EEA1_HUMAN	EEA1	EEA1_HUMAN Early endosome antigen 1	4	212.904	212.998	212.951	185.847	174.813	180.33	0.846815	-0.239882	176.814	209.727	193.27	0.907582	-0.1399	204.19	203.53	203.86	0.957309	-0.0629428	200.373	228.993	214.683	1.00813	0.0116864	#N/A	#N/A	#N/A	#N/A	#N/A	#N/A	EEA1	#N/A	#N/A	#N/A	#N/A	#N/A	#N/A		G6PC3		JAKMIP3		DECR1	CD8B2			CDC14B
sp|Q8N3D4|EH1L1_HUMAN	EHBP1L1	EH1L1_HUMAN EH domain-binding protein 1-like protein 1	1	60.9036	61.718	61.3108	55.7056	46.7246	51.2151	0.835336	-0.259572	64.8515	60.5789	62.7152	1.02291	0.0326739	63.2522	62.0983	62.6753	1.02225	0.0317546	54.0447	84.6671	69.3559	1.13122	0.177877	#N/A	#N/A	#N/A	#N/A	#N/A	#N/A	EHBP1L1	#N/A	#N/A	#N/A	#N/A	#N/A	#N/A		GDPD3		LARGE1		DELE1	CD99L2			CDC25C
sp|Q9H4M9|EHD1_HUMAN	EHD1	EHD1_HUMAN EH domain-containing protein 1	21	4512.92	4344.46	4428.69	4654.59	4435.18	4544.89	1.02624	0.0373638	4664	4533.25	4598.62	1.03837	0.0543225	4539.55	4588.13	4563.84	1.03052	0.0433682	4205.12	4334.31	4269.72	0.964103	-0.0527402	#N/A	#N/A	#N/A	#N/A	#N/A	#N/A	EHD1	#N/A	#N/A	#N/A	#N/A	#N/A	#N/A		GGCX		LARGE2		DGLUCY	CDH10			CDC26
sp|Q9NZN4|EHD2_HUMAN	EHD2	EHD2_HUMAN EH domain-containing protein 2	19	2857.61	2803.57	2830.59	3033.52	2922.61	2978.07	1.0521	0.0732724	2889.01	2934.11	2911.56	1.02861	0.0406896	3026.02	3043.94	3034.98	1.07221	0.100584	3046.91	2817.67	2932.29	1.03593	0.050925	#N/A	#N/A	#N/A	#N/A	#N/A	#N/A	EHD2	#N/A	#N/A	#N/A	#N/A	#N/A	#N/A		GLYATL2		LFNG		DGUOK	CDH11			CDC27
sp|Q9H223|EHD4_HUMAN	EHD4	EHD4_HUMAN EH domain-containing protein 4	3	495.621	404.799	450.21	573.349	537.229	555.289	1.2334	0.302641	585.45	526.074	555.762	1.23445	0.303869	485.929	563.025	524.477	1.16496	0.220281	503.206	297.811	400.509	0.889604	-0.168765	#N/A	#N/A	#N/A	#N/A	#N/A	#N/A	EHD4	#N/A	#N/A	#N/A	#N/A	#N/A	#N/A		GPAA1		MAN1A1		DHFR2	CDH12			CDC40
sp|Q8IYI6|EXOC8_HUMAN	EXOC8	EXOC8_HUMAN Exocyst complex component 8	1	54.0276	80.52	67.2738	50.1007	45.9582	48.0294	0.71394	-0.486125	48.3201	47.6961	48.0081	0.713623	-0.486767	52.3316	48.1548	50.2432	0.746846	-0.421116	44.6861	89.1392	66.9126	0.994632	-0.00776577	#N/A	#N/A	#N/A	#N/A	#N/A	#N/A	#N/A	#N/A	#N/A	#N/A	#N/A	#N/A	#N/A		GPAT3		MAN1A2		DHODH	CDH13			CDC7
sp|Q641Q2|FA21A_HUMAN	FAM21A	FA21A_HUMAN WASH complex subunit FAM21A	15	2291.06	2171.61	2231.34	1787.15	1909.75	1848.45	0.828405	-0.271591	2217.11	2056.44	2136.78	0.957622	-0.0624721	2141.34	2017.59	2079.47	0.931938	-0.101695	1676.77	2225.81	1951.29	0.874494	-0.193479	#N/A	#N/A	#N/A	#N/A	#N/A	#N/A	#N/A	#N/A	#N/A	#N/A	#N/A	#N/A	#N/A		GPAT4		MAN1C1		DHRS2	CDH15			CDC73
sp|Q5T1M5|FKB15_HUMAN	FKBP15	FKB15_HUMAN FK506-binding protein 15	4	320.485	295.012	307.749	284.859	280.443	282.651	0.918448	-0.12273	297.384	289.632	293.508	0.953727	-0.068352	305.083	321.681	313.382	1.01831	0.0261705	255.443	248.014	251.728	0.817968	-0.289883	#N/A	#N/A	#N/A	#N/A	#N/A	#N/A	FKBP15	#N/A	#N/A	#N/A	#N/A	#N/A	#N/A		GSG1		MAN2A1		DHTKD1	CDH16			CDCA2
sp|P31150|GDIA_HUMAN	GDI1	GDIA_HUMAN Rab GDP dissociation inhibitor alpha	10	1023.88	929.096	976.488	1159.06	1153.21	1156.13	1.18397	0.243636	1181.91	1364.65	1273.28	1.30394	0.382875	1295.97	1345.93	1320.95	1.35276	0.435902	1176.04	1187.75	1181.89	1.21035	0.275428	#N/A	#N/A	#N/A	#N/A	#N/A	#N/A	#N/A	#N/A	#N/A	#N/A	#N/A	#N/A	#N/A		GUCY2D		MAN2A2		DHX30	CDH17			CDCA4
sp|P50395|GDIB_HUMAN	GDI2	GDIB_HUMAN Rab GDP dissociation inhibitor beta	11	2891.48	2476.81	2684.14	3161.57	3218.81	3190.19	1.18853	0.24918	3609.77	4543.71	4076.74	1.51882	0.602953	3741.85	4052.19	3897.02	1.45187	0.537909	3789	3455.3	3622.15	1.34946	0.432384	#N/A	#N/A	#N/A	#N/A	#N/A	#N/A	#N/A	#N/A	#N/A	#N/A	#N/A	#N/A	#N/A		H6PD		MANEA		DLAT	CDH18			CDK12
sp|Q4V328|GRAP1_HUMAN	GRIPAP1	GRAP1_HUMAN GRIP1-associated protein 1	1	42.5012	42.5181	42.5096	41.8927	32.7268	37.3097	0.877677	-0.188238	43.184	42.3106	42.7473	1.00559	0.00804292	36.687	39.7722	38.2296	0.899316	-0.1531	32.3123	28.5055	30.4089	0.715341	-0.483297	#N/A	#N/A	#N/A	#N/A	#N/A	#N/A	GRIPAP1	#N/A	#N/A	#N/A	#N/A	#N/A	#N/A		HACD1		MANEAL		DLST	CDH19			CDK13
sp|Q12768|STRUM_HUMAN	KIAA0196	STRUM_HUMAN WASH complex subunit strumpellin	2	484.393	480.284	482.338	450.399	467.489	458.944	0.951498	-0.0717278	523.323	452.425	487.874	1.01148	0.0164626	469.863	513.081	491.472	1.01894	0.0270633	386.322	363.242	374.782	0.77701	-0.363994	#N/A	#N/A	#N/A	#N/A	#N/A	#N/A	#N/A	#N/A	#N/A	#N/A	#N/A	#N/A	#N/A		HACD2		MARCH4		DMAC1	CDH2			CDK8
sp|Q2M389|WASH7_HUMAN	KIAA1033	WASH7_HUMAN WASH complex subunit 7	7	784.687	703.574	744.13	691.658	698.291	694.975	0.933942	-0.0985956	783.73	727.887	755.808	1.01569	0.0224651	737.158	752.176	744.667	1.00072	0.00103977	604.76	656.139	630.449	0.84723	-0.239175	#N/A	#N/A	#N/A	#N/A	#N/A	#N/A	#N/A	#N/A	#N/A	#N/A	#N/A	#N/A	#N/A		HACD3		MARCH9		DMAC2	CDH20			CDKN1C
sp|Q9BTU6|P4K2A_HUMAN	PI4K2A	P4K2A_HUMAN Phosphatidylinositol 4-kinase type 2-alpha	53	15982.1	15309.7	15645.9	19391.2	19898.4	19644.8	1.25559	0.328363	16537.4	14500.4	15518.9	0.991883	-0.0117583	13608.1	15436.8	14522.5	0.928195	-0.1075	12698.4	11523.8	12111.1	0.774075	-0.369455	#N/A	#N/A	#N/A	#N/A	#N/A	#N/A	#N/A	#N/A	#N/A	#N/A	#N/A	#N/A	#N/A		HACD4		MFNG		DMAC2L	CDH22			CDKN2AIP
sp|Q8TCG2|P4K2B_HUMAN	PI4K2B	P4K2B_HUMAN Phosphatidylinositol 4-kinase type 2-beta	1	96.2926	100.915	98.6038	117.27	99.1594	108.215	1.09747	0.134181	100.041	110.637	105.339	1.06831	0.0953245	108.558	118.008	113.283	1.14887	0.200216	103.466	125.448	114.457	1.16078	0.215091	#N/A	#N/A	#N/A	#N/A	#N/A	#N/A	#N/A	#N/A	#N/A	#N/A	#N/A	#N/A	#N/A		HCRT		MGAT1		DMGDH	CDH23			CDT1
sp|O00443|P3C2A_HUMAN	PIK3C2A	P3C2A_HUMAN Phosphatidylinositol 4-phosphate 3-kinase C2 domain-containing subunit alpha	1	35.7278	27.897	31.8124	22.501	22.315	22.408	0.704379	-0.505575	29.0441	26.0765	27.5603	0.866338	-0.206998	25.4338	20.8832	23.1585	0.727971	-0.458047	23.3152	37.4422	30.3787	0.954933	-0.0665291	#N/A	#N/A	#N/A	#N/A	#N/A	#N/A	#N/A	#N/A	#N/A	#N/A	#N/A	#N/A	#N/A		HERPUD1		MGAT2		DNAJC11	CDH24			CDX1
sp|Q8NEB9|PK3C3_HUMAN	PIK3C3	PK3C3_HUMAN Phosphatidylinositol 3-kinase catalytic subunit type 3	4	265.594	291.883	278.738	219.352	215.13	217.241	0.779372	-0.359616	211.239	210.569	210.904	0.756637	-0.402326	217.207	224.865	221.036	0.792987	-0.334631	224.653	271.449	248.051	0.889906	-0.168276	#N/A	#N/A	#N/A	#N/A	#N/A	#N/A	PIK3C3	#N/A	#N/A	#N/A	#N/A	#N/A	#N/A		HHAT		MGAT3		DNAJC15	CDH26			CDX2
sp|Q99570|PI3R4_HUMAN	PIK3R4	PI3R4_HUMAN Phosphoinositide 3-kinase regulatory subunit 4	3	515.801	505.594	510.697	391.295	372.132	381.714	0.747436	-0.419979	381.367	333.999	357.683	0.700381	-0.513787	384.11	362.728	373.419	0.731194	-0.451674	397.157	465.245	431.201	0.844337	-0.244108	#N/A	#N/A	#N/A	#N/A	#N/A	#N/A	PIK3R4	#N/A	#N/A	#N/A	#N/A	#N/A	#N/A		HHATL		MGAT4A		DNAJC19	CDH3			CDX4
sp|P18031|PTN1_HUMAN	PTPN1	PTN1_HUMAN Tyrosine-protein phosphatase non-receptor type 1	13	1047.19	1064.68	1055.93	1368.08	1310.28	1339.18	1.26824	0.342829	1151.61	1157.47	1154.54	1.09338	0.128797	1215.36	1171.92	1193.64	1.13041	0.176847	1284.49	1210.44	1247.47	1.18138	0.240478	#N/A	#N/A	#N/A	#N/A	#N/A	#N/A	#N/A	#N/A	#N/A	#N/A	#N/A	#N/A	#N/A		HMGCR		MGAT4B		DNAJC30	CDH4			CDY1
sp|Q06124|PTN11_HUMAN	PTPN11	PTN11_HUMAN Tyrosine-protein phosphatase non-receptor type 11	1	216.424	206.029	211.226	155.624	170.741	163.183	0.772547	-0.372304	207.065	181.285	194.175	0.919274	-0.121433	182.045	185.68	183.863	0.870452	-0.200164	175.708	194.381	185.044	0.876048	-0.190919	#N/A	#N/A	#N/A	#N/A	#N/A	#N/A	#N/A	#N/A	#N/A	#N/A	#N/A	#N/A	#N/A		HMOX1		MGAT4C		DNLZ	CDH5			CDY2A
sp|P61026|RAB10_HUMAN	RAB10	RAB10_HUMAN Ras-related protein Rab-10	13	3326.82	3358.41	3342.61	5346.73	5374.48	5360.6	1.60372	0.681419	4104.5	4143.69	4124.09	1.23379	0.3031	3864.09	3711.5	3787.8	1.13318	0.180381	3406.77	3916.69	3661.73	1.09547	0.131548	#N/A	#N/A	#N/A	#N/A	#N/A	#N/A	RAB10	#N/A	#N/A	#N/A	#N/A	#N/A	#N/A		HMOX2		MGAT5		EARS2	CDH6			CDYL
sp|P62491|RB11A_HUMAN	RAB11A	RB11A_HUMAN Ras-related protein Rab-11A	4	538.024	448.32	493.172	757.972	734.767	746.37	1.51341	0.597799	760.721	648.392	704.557	1.42862	0.514625	559.142	661.792	610.467	1.23784	0.307822	552.487	347.683	450.085	0.912633	-0.131893	#N/A	#N/A	#N/A	#N/A	#N/A	#N/A	RAB11A	#N/A	#N/A	#N/A	#N/A	#N/A	#N/A		HSD11B1		MGAT5B		ECHDC2	CDH7			CDYL2
sp|Q15907|RB11B_HUMAN	RAB11B	RB11B_HUMAN Ras-related protein Rab-11B	44	13038.4	12098.4	12568.4	17333.9	17136.8	17235.3	1.37132	0.45557	16616.1	14642.5	15629.3	1.24354	0.314452	13497.3	14736.4	14116.8	1.1232	0.167617	12350.1	11367.8	11859	0.943553	-0.0838247	#N/A	#N/A	#N/A	#N/A	#N/A	#N/A	RAB11B	#N/A	#N/A	#N/A	#N/A	#N/A	#N/A		HSD11B2		MMD2		ECHDC3	CDH8			CEBPA
sp|Q6WKZ4|RFIP1_HUMAN	RAB11FIP1	RFIP1_HUMAN Rab11 family-interacting protein 1	23	3534.93	3185.27	3360.1	3276.5	3320.51	3298.51	0.981669	-0.0266919	3754.69	3382.85	3568.77	1.0621	0.0869228	3238.44	3296.68	3267.56	0.972459	-0.0402904	2631.8	3089.69	2860.74	0.851387	-0.232113	#N/A	#N/A	#N/A	#N/A	#N/A	#N/A	RAB11FIP1	#N/A	#N/A	#N/A	#N/A	#N/A	#N/A		HSD17B11		MPPE1		ECHS1	CDH9			CEBPD
sp|Q7L804|RFIP2_HUMAN	RAB11FIP2	RFIP2_HUMAN Rab11 family-interacting protein 2	1	88.0366	80.3786	84.2076	87.1055	87.6267	87.3661	1.03751	0.0531231	105.931	88.4777	97.2044	1.15434	0.20707	88.3282	90.2234	89.2758	1.06019	0.0843187	72.8963	83.5188	78.2075	0.928747	-0.106643	#N/A	#N/A	#N/A	#N/A	#N/A	#N/A	#N/A	#N/A	#N/A	#N/A	#N/A	#N/A	#N/A		HSD17B12		NAGPA		ECI1	CDHR1			CEBPE
sp|Q9BXF6|RFIP5_HUMAN	RAB11FIP5	RFIP5_HUMAN Rab11 family-interacting protein 5	29	5833.06	6107.76	5970.41	5105.07	5298.01	5201.54	0.87122	-0.198891	6321.95	5550.59	5936.27	0.994282	-0.0082733	5209.15	5479.44	5344.3	0.89513	-0.15983	4611.55	7247.69	5929.62	0.993168	-0.00989036	#N/A	#N/A	#N/A	#N/A	#N/A	#N/A	#N/A	#N/A	#N/A	#N/A	#N/A	#N/A	#N/A		HSD17B13		NDST1		EFHD1	CDHR2			CEBPG
sp|Q6IQ22|RAB12_HUMAN	RAB12	RAB12_HUMAN Ras-related protein Rab-12	12	2307.56	2439.52	2373.54	2792.76	2789.64	2791.2	1.17597	0.233845	2786.4	2481.59	2633.99	1.10973	0.150212	2547.24	2792.53	2669.89	1.12485	0.169737	2328.65	2560.67	2444.66	1.02996	0.0425935	#N/A	#N/A	#N/A	#N/A	#N/A	#N/A	RAB12	#N/A	#N/A	#N/A	#N/A	#N/A	#N/A		HSD17B3		NDST2		ENDOG	CDHR3			CEBPZ
sp|P51153|RAB13_HUMAN	RAB13	RAB13_HUMAN Ras-related protein Rab-13	4	564.984	570.087	567.535	743.821	769.643	756.732	1.33337	0.415072	627.514	609.056	618.285	1.08942	0.123561	576.253	611.007	593.63	1.04598	0.0648534	511.165	508.704	509.935	0.898507	-0.154399	#N/A	#N/A	#N/A	#N/A	#N/A	#N/A	#N/A	#N/A	#N/A	#N/A	#N/A	#N/A	#N/A		HSD3B7		NDST3		ENOSF1	CDHR5			CENPA
sp|P61106|RAB14_HUMAN	RAB14	RAB14_HUMAN Ras-related protein Rab-14	34	5997.06	5703.54	5850.3	7846.68	8304.75	8075.72	1.38039	0.465079	7312.67	6265.32	6788.99	1.16045	0.214687	6551.05	7114.72	6832.89	1.16795	0.223984	6118.37	5383.44	5750.9	0.98301	-0.0247216	#N/A	#N/A	#N/A	#N/A	#N/A	#N/A	RAB14	#N/A	#N/A	#N/A	#N/A	#N/A	#N/A		HSP90B1		NDST4		ERAL1	CDON			CENPB
sp|Q9NP72|RAB18_HUMAN	RAB18	RAB18_HUMAN Ras-related protein Rab-18	20	4351.9	4336.31	4344.1	6900.63	6659.2	6779.91	1.56072	0.642208	5630.56	5139.62	5385.09	1.23963	0.309911	5148.49	5186.72	5167.6	1.18957	0.250437	4491.08	4899.78	4695.43	1.08087	0.112198	#N/A	#N/A	#N/A	#N/A	#N/A	#N/A	#N/A	#N/A	#N/A	#N/A	#N/A	#N/A	#N/A		HSPA13		NECAB3		ETFA	CEACAM20			CENPBD1
sp|P62820|RAB1A_HUMAN	RAB1A	RAB1A_HUMAN Ras-related protein Rab-1A	38	8958.39	8949.01	8953.7	15034.2	15014.8	15024.5	1.67802	0.746761	12550.6	11753.1	12151.9	1.35719	0.44062	10527.2	11270.9	10899	1.21727	0.283647	9651.66	10700.2	10175.9	1.13651	0.184605	#N/A	#N/A	#N/A	#N/A	#N/A	#N/A	RAB1A	#N/A	#N/A	#N/A	#N/A	#N/A	#N/A		HSPA5		NUCB1		ETFB	CEACAM5			CENPC
sp|Q9H0U4|RAB1B_HUMAN	RAB1B	RAB1B_HUMAN Ras-related protein Rab-1B	17	4484.69	3975.95	4230.32	7529.05	7539.9	7534.48	1.78107	0.83274	6217.44	6003.91	6110.67	1.44449	0.530565	5053.1	5417.78	5235.44	1.2376	0.307544	4978.6	4558.12	4768.36	1.12719	0.172726	#N/A	#N/A	#N/A	#N/A	#N/A	#N/A	#N/A	#N/A	#N/A	#N/A	#N/A	#N/A	#N/A		HYOU1		NUCB2		ETFDH	CEACAM6			CENPH
sp|Q9UL25|RAB21_HUMAN	RAB21	RAB21_HUMAN Ras-related protein Rab-21	12	1909.23	1891.32	1900.28	3026.35	3086.18	3056.26	1.60833	0.685561	2465.4	2211.69	2338.55	1.23064	0.299403	2050.47	2242	2146.23	1.12943	0.1756	1931.33	1898.69	1915.01	1.00775	0.0111437	#N/A	#N/A	#N/A	#N/A	#N/A	#N/A	#N/A	#N/A	#N/A	#N/A	#N/A	#N/A	#N/A		ICMT		OSBPL11		ETFRF1	CEACAM7			CENPI
sp|Q9UL26|RB22A_HUMAN	RAB22A	RB22A_HUMAN Ras-related protein Rab-22A	5	825.174	808.507	816.841	1196.56	1219.12	1207.84	1.47867	0.564303	1040.57	954.827	997.698	1.22141	0.28855	889.558	910.294	899.926	1.10172	0.139752	821.589	842.905	832.247	1.01886	0.0269574	#N/A	#N/A	#N/A	#N/A	#N/A	#N/A	RAB22A	#N/A	#N/A	#N/A	#N/A	#N/A	#N/A		IER3IP1		OSBPL9		ETNPPL	CEACAM8			CENPK
sp|Q9ULC3|RAB23_HUMAN	RAB23	RAB23_HUMAN Ras-related protein Rab-23	9	1819.61	1772.51	1796.06	1880.94	2069.82	1975.38	1.09984	0.137295	1828.01	1764.02	1796.01	0.999975	-3.61469e-05	1712.2	1634.66	1673.43	0.931723	-0.102027	1474.81	1813.42	1644.12	0.915401	-0.127524	#N/A	#N/A	#N/A	#N/A	#N/A	#N/A	#N/A	#N/A	#N/A	#N/A	#N/A	#N/A	#N/A		IKBIP		PACS1		EXD2	CELSR1			CENPL
sp|P51159|RB27A_HUMAN	RAB27A	RB27A_HUMAN Ras-related protein Rab-27A	12	2470.96	2633.55	2552.26	3233.5	3214.66	3224.08	1.26323	0.337115	3095.26	2729.36	2912.31	1.14107	0.190391	2687.24	2873.34	2780.29	1.08935	0.123463	2401.29	2529.66	2465.47	0.965999	-0.0499069	#N/A	#N/A	#N/A	#N/A	#N/A	#N/A	RAB27A	#N/A	#N/A	#N/A	#N/A	#N/A	#N/A		ILDR2		PAQR3		EXOG	CELSR2			CENPN
sp|O00194|RB27B_HUMAN	RAB27B	RB27B_HUMAN Ras-related protein Rab-27B	4	1130.95	1078.9	1104.93	1646.36	1619.46	1632.91	1.47785	0.563497	1320.32	1192.32	1256.32	1.13702	0.185256	1191.17	1289.47	1240.32	1.12254	0.166764	1172.92	1045.91	1109.41	1.00406	0.00585069	#N/A	#N/A	#N/A	#N/A	#N/A	#N/A	RAB27B	#N/A	#N/A	#N/A	#N/A	#N/A	#N/A		INSIG1		PCSK7		FAM162A	CELSR3			CENPO
sp|P61019|RAB2A_HUMAN	RAB2A	RAB2A_HUMAN Ras-related protein Rab-2A	20	7036.92	7097.75	7067.34	8280.32	8580.56	8430.44	1.19287	0.254442	8080.08	6870.53	7475.31	1.05773	0.0809661	6847.47	7809.11	7328.29	1.03692	0.0523103	6711.57	6434.53	6573.05	0.930061	-0.104603	#N/A	RAB2A	#N/A	#N/A	#N/A	#N/A	#N/A	#N/A	#N/A	#N/A	#N/A	#N/A	#N/A		INSIG2		POMGNT1		FAM210B	CEMIP2			CENPP
sp|Q8WUD1|RAB2B_HUMAN	RAB2B	RAB2B_HUMAN Ras-related protein Rab-2B	17	6119.48	6305.61	6212.55	6960.44	7018.95	6989.69	1.12509	0.170045	6420.51	5708.29	6064.4	0.976154	-0.0348195	5602.94	6324.84	5963.89	0.959975	-0.0589307	5408.81	5632.98	5520.9	0.888669	-0.170282	#N/A	#N/A	#N/A	#N/A	#N/A	#N/A	#N/A	#N/A	#N/A	#N/A	#N/A	#N/A	#N/A		ITPR1		PRRC1		FARS2	CFAP65			CENPQ
sp|Q15771|RAB30_HUMAN	RAB30	RAB30_HUMAN Ras-related protein Rab-30	8	1067.59	1285.31	1176.45	1530.5	1580.52	1555.51	1.32221	0.402948	1305.83	1198.77	1252.3	1.06447	0.0901402	1127.09	1202.56	1164.82	0.990119	-0.0143268	1068.01	1382.47	1225.24	1.04147	0.0586244	#N/A	#N/A	#N/A	#N/A	#N/A	#N/A	#N/A	#N/A	#N/A	#N/A	#N/A	#N/A	#N/A		ITPR2		PXYLP1		FASTK	CHRM1			CENPS
sp|Q13636|RAB31_HUMAN	RAB31	RAB31_HUMAN Ras-related protein Rab-31	8	1100.28	996.506	1048.39	1921.04	2038.29	1979.66	1.88829	0.917077	1504.15	1423.77	1463.96	1.39638	0.481697	1233.33	1282.77	1258.05	1.19998	0.26301	1150.01	1100.2	1125.11	1.07317	0.10188	#N/A	#N/A	#N/A	#N/A	#N/A	#N/A	#N/A	#N/A	#N/A	#N/A	#N/A	#N/A	#N/A		ITPR3		QPCTL		FASTKD1	CHRM2			CENPT
sp|Q13637|RAB32_HUMAN	RAB32	RAB32_HUMAN Ras-related protein Rab-32	14	2077.49	2127.25	2102.37	2527.59	2592.64	2560.11	1.21773	0.284192	2178.81	1996.81	2087.81	0.993074	-0.0100262	2069.7	2155.94	2112.82	1.00497	0.00715327	1775.93	2307.54	2041.74	0.971159	-0.042221	#N/A	#N/A	#N/A	#N/A	#N/A	#N/A	#N/A	#N/A	#N/A	#N/A	#N/A	#N/A	#N/A		JAGN1		QSOX1		FASTKD2	CHRM3			CENPW
sp|Q9H082|RB33B_HUMAN	RAB33B	RB33B_HUMAN Ras-related protein Rab-33B	2	505.801	500.559	503.18	735.612	809.166	772.389	1.53502	0.618253	595.056	578.419	586.737	1.16606	0.221641	518.221	511.308	514.764	1.02302	0.032838	516.157	618.135	567.146	1.12712	0.172646	#N/A	#N/A	#N/A	#N/A	#N/A	#N/A	#N/A	#N/A	#N/A	#N/A	#N/A	#N/A	#N/A		JKAMP		RER1		FASTKD3	CHRM4			CENPX
sp|Q9BZG1|RAB34_HUMAN	RAB34	RAB34_HUMAN Ras-related protein Rab-34	13	2533.51	2661.99	2597.75	2922.66	3088.37	3005.51	1.15697	0.21035	2671.93	2526.28	2599.11	1.00052	0.000752321	2392.88	2499.36	2446.12	0.94163	-0.0867674	2124.96	2834.17	2479.57	0.954505	-0.0671756	#N/A	#N/A	#N/A	#N/A	#N/A	#N/A	#N/A	#N/A	RAB34	#N/A	#N/A	#N/A	#N/A		JMJD8		RFNG		FASTKD5	CHRM5			CGGBP1
sp|Q15286|RAB35_HUMAN	RAB35	RAB35_HUMAN Ras-related protein Rab-35	13	3843.07	3806.11	3824.59	6205.5	6812.33	6508.91	1.70186	0.767112	5188.4	4888.71	5038.56	1.31741	0.397705	4182.2	4575.12	4378.66	1.14487	0.195184	4151.18	4428.11	4289.65	1.1216	0.165553	#N/A	#N/A	#N/A	#N/A	#N/A	#N/A	#N/A	#N/A	#N/A	#N/A	#N/A	#N/A	#N/A		JSRP1		RHBDD2		FDX1	CHRNA1			CHAF1A
sp|Q14964|RB39A_HUMAN	RAB39A	RB39A_HUMAN Ras-related protein Rab-39A	1	110.109	125.823	117.966	124.927	127.633	126.28	1.07048	0.0982551	134.098	104.61	119.354	1.01177	0.0168758	119.402	127.07	123.236	1.04467	0.0630527	113.463	109.903	111.683	0.946739	-0.0789615	#N/A	#N/A	#N/A	#N/A	#N/A	#N/A	#N/A	#N/A	#N/A	#N/A	#N/A	#N/A	#N/A		KCNRG		RHOBTB3		FDX2	CHRNA10			CHD1L
sp|O95716|RAB3D_HUMAN	RAB3D	RAB3D_HUMAN Ras-related protein Rab-3D	3	278.725	322.965	300.845	526.398	502.3	514.349	1.70968	0.773727	413.368	424.125	418.746	1.3919	0.477057	347.274	342.923	345.099	1.1471	0.197988	340.794	323.272	332.033	1.10367	0.142306	#N/A	#N/A	#N/A	#N/A	#N/A	#N/A	#N/A	#N/A	#N/A	#N/A	#N/A	#N/A	#N/A		KDELR1		RND3		FDXR	CHRNA2			CHD2
sp|Q15042|RB3GP_HUMAN	RAB3GAP1	RB3GP_HUMAN Rab3 GTPase-activating protein catalytic subunit	1	397.705	328.917	363.311	485.821	468.836	477.329	1.31383	0.393777	512.378	523.954	518.166	1.42623	0.512209	374.136	478.676	426.406	1.17367	0.231023	431.452	271.729	351.591	0.96774	-0.047309	#N/A	#N/A	#N/A	#N/A	#N/A	#N/A	#N/A	#N/A	#N/A	RAB3GAP1	#N/A	#N/A	#N/A		KDELR2		RNF125		FECH	CHRNA3			CHD5
sp|Q9H2M9|RBGPR_HUMAN	RAB3GAP2	RBGPR_HUMAN Rab3 GTPase-activating protein non-catalytic subunit	6	572.112	617.939	595.025	573.836	549.155	561.495	0.943649	-0.083677	607.959	578.195	593.077	0.996725	-0.00473207	597.366	549.242	573.304	0.963495	-0.0536512	512.9	643.008	577.954	0.97131	-0.0419968	#N/A	#N/A	#N/A	#N/A	#N/A	#N/A	#N/A	#N/A	#N/A	#N/A	#N/A	#N/A	#N/A		KDELR3		RNF24		FMC1	CHRNA4			CHD6
sp|Q8N4Z0|RAB42_HUMAN	RAB42	RAB42_HUMAN Putative Ras-related protein Rab-42	3	273.919	279.482	276.701	279.765	255.695	267.73	0.96758	-0.0475464	288.426	254.59	271.508	0.981234	-0.0273305	257.767	275.058	266.413	0.962819	-0.0546635	241.952	283.313	262.632	0.949158	-0.0752798	#N/A	#N/A	#N/A	#N/A	#N/A	#N/A	#N/A	#N/A	#N/A	#N/A	#N/A	#N/A	#N/A		KDSR		RXYLT1		FOXRED1	CHRNA5			CHD7
sp|Q86YS6|RAB43_HUMAN	RAB43	RAB43_HUMAN Ras-related protein Rab-43	1	61.8534	46.9873	54.4203	68.7445	68.9687	68.8566	1.26527	0.339449	54.175	50.9782	52.5766	0.96612	-0.0497254	52.2287	53.3578	52.7933	0.970101	-0.0437928	54.8405	51.3237	53.0821	0.975409	-0.0359208	#N/A	#N/A	#N/A	#N/A	#N/A	#N/A	#N/A	#N/A	#N/A	#N/A	#N/A	#N/A	#N/A		KRTCAP2		SDF4		FPGS	CHRNA6			CHD8
sp|P20338|RAB4A_HUMAN	RAB4A	RAB4A_HUMAN Ras-related protein Rab-4A	1	184.631	215.115	199.873	234.321	233.072	233.697	1.16922	0.225553	216.071	190.02	203.046	1.01587	0.0227195	214.149	214.383	214.266	1.07201	0.100319	187.742	196.095	191.918	0.960202	-0.0585898	#N/A	#N/A	#N/A	#N/A	#N/A	#N/A	RAB4A	#N/A	#N/A	#N/A	#N/A	#N/A	#N/A		KTN1		SEC22B		FTMT	CHRNA7			CHEK2
sp|P20339|RAB5A_HUMAN	RAB5A	RAB5A_HUMAN Ras-related protein Rab-5A	11	627.343	689.143	658.243	930.522	869.362	899.942	1.36719	0.451212	737.763	699.019	718.391	1.09138	0.126149	677.889	752.103	714.996	1.08622	0.119315	677.823	788.247	733.035	1.11362	0.155262	#N/A	#N/A	#N/A	#N/A	#N/A	#N/A	RAB5A	#N/A	#N/A	#N/A	#N/A	#N/A	#N/A		LCLAT1		SGMS1		FUNDC1	CHRNA9			CHFR
sp|P61020|RAB5B_HUMAN	RAB5B	RAB5B_HUMAN Ras-related protein Rab-5B	13	2459.38	2302.26	2380.82	3191.64	3152.86	3172.25	1.33242	0.414048	2730.41	2582.71	2656.56	1.11582	0.158101	2493.27	2658.63	2575.95	1.08196	0.113646	2312.68	2382.97	2347.82	0.986141	-0.0201337	#N/A	#N/A	#N/A	#N/A	#N/A	#N/A	RAB5B	#N/A	#N/A	#N/A	#N/A	#N/A	#N/A		LCTL		SGSM1		G0S2	CHRNB1			CHRAC1
sp|P51148-2|RAB5C_HUMAN	RAB5C	RAB5C_HUMAN Isoform 2 of Ras-related protein Rab-5C	22	3523.81	3424.87	3474.34	4821.18	4977.71	4899.44	1.41018	0.495879	4055.19	3785.96	3920.57	1.12844	0.174326	3572.8	3976.65	3774.73	1.08646	0.119633	3518.4	3591.37	3554.89	1.02318	0.0330639	#N/A	#N/A	#N/A	#N/A	#N/A	#N/A	#N/A	#N/A	#N/A	#N/A	#N/A	#N/A	#N/A		LDAH		SLC24A5		GATB	CHRNB2			CHTF18
sp|P20340|RAB6A_HUMAN	RAB6A	RAB6A_HUMAN Ras-related protein Rab-6A	1	231.081	199.97	215.525	254.53	274.614	264.572	1.22757	0.295802	291.097	258.923	275.01	1.276	0.351626	264.372	278.328	271.35	1.25902	0.332296	301.858	289.762	295.81	1.37251	0.456812	#N/A	#N/A	#N/A	#N/A	#N/A	#N/A	#N/A	#N/A	#N/A	#N/A	#N/A	#N/A	#N/A		LMF1		SLC30A5		GATC	CHRNB3			CHTF8
sp|P20340-2|RAB6A_HUMAN	RAB6A	RAB6A_HUMAN Isoform 2 of Ras-related protein Rab-6A	22	5002.22	4726.51	4864.36	6945	7112.06	7028.53	1.4449	0.530971	6949.72	6226.82	6588.27	1.35439	0.437648	6441.46	7068.67	6755.07	1.38868	0.473718	6995.33	5858.64	6426.99	1.32124	0.401891	#N/A	#N/A	#N/A	#N/A	#N/A	#N/A	#N/A	#N/A	#N/A	#N/A	#N/A	#N/A	#N/A		LMF2		SLC30A6		GATD3A	CHRNB4			CHTOP
sp|P51149|RAB7A_HUMAN	RAB7A	RAB7A_HUMAN Ras-related protein Rab-7a	47	7194.63	6977.38	7086.01	20544.2	22800.4	21672.3	3.05847	1.61281	11542.8	9969.21	10756	1.51792	0.602098	7439.21	8480.6	7959.91	1.12333	0.167779	6550.64	5805.71	6178.18	0.871884	-0.197792	#N/A	#N/A	#N/A	#N/A	#N/A	#N/A	RAB7A	#N/A	#N/A	#N/A	#N/A	#N/A	#N/A		LNPK		SLC30A7		GATD3B	CHRND			CIART
sp|P61006|RAB8A_HUMAN	RAB8A	RAB8A_HUMAN Ras-related protein Rab-8A	28	8650.51	8931.06	8790.78	10707.7	10945.3	10826.5	1.23157	0.300503	9530.74	8574.62	9052.68	1.02979	0.042353	8435.08	8989.27	8712.17	0.991058	-0.0129591	7277.06	9556.76	8416.91	0.95747	-0.0627013	#N/A	#N/A	#N/A	#N/A	#N/A	#N/A	RAB8A	#N/A	#N/A	#N/A	#N/A	#N/A	#N/A		LPCAT3		SLC35A1		GATM	CHRNE			CIC
sp|Q92930|RAB8B_HUMAN	RAB8B	RAB8B_HUMAN Ras-related protein Rab-8B	2	96.9348	109.62	103.277	127.175	120.254	123.715	1.19789	0.26049	114.945	110.629	112.787	1.09208	0.127076	94.9021	94.4083	94.6552	0.916514	-0.125771	96.273	101.592	98.9325	0.95793	-0.0620081	#N/A	#N/A	#N/A	#N/A	#N/A	#N/A	#N/A	#N/A	#N/A	#N/A	#N/A	#N/A	#N/A		LPCAT4		SLC35A2		GCDH	CHRNG			CIITA
sp|P51151|RAB9A_HUMAN	RAB9A	RAB9A_HUMAN Ras-related protein Rab-9A	18	7477.15	8628.02	8052.59	7338.71	6933.72	7136.22	0.886202	-0.174293	6611.07	5617.7	6114.39	0.759307	-0.397245	6548.91	6914.85	6731.88	0.83599	-0.258443	5846.27	8621.41	7233.84	0.898325	-0.15469	#N/A	#N/A	#N/A	#N/A	#N/A	#N/A	RAB9A	#N/A	#N/A	#N/A	#N/A	#N/A	#N/A		LPGAT1		SLC35A3		GCSH	CLCN1			CINP
sp|Q9UI14|PRAF1_HUMAN	RABAC1	PRAF1_HUMAN Prenylated Rab acceptor protein 1	2	33.7523	44.936	39.3441	51.1063	48.5039	49.8051	1.26588	0.340144	54.7207	51.8519	53.2863	1.35436	0.437616	57.8914	55.5093	56.7004	1.44114	0.527209	59.4964	54.7317	57.114	1.45165	0.537697	#N/A	#N/A	#N/A	#N/A	#N/A	#N/A	#N/A	#N/A	#N/A	#N/A	#N/A	#N/A	#N/A		LRIT1		SLC35A4		GDF5OS	CLCN2			CITED2
sp|Q5HYI8|RABL3_HUMAN	RABL3	RABL3_HUMAN Rab-like protein 3	2	145.491	131.416	138.454	145.811	144.733	145.272	1.04925	0.0693551	140.242	144.369	142.305	1.02782	0.0395899	130.608	126.936	128.772	0.930074	-0.104583	126.885	168.693	147.789	1.06743	0.0941374	#N/A	#N/A	#N/A	#N/A	#N/A	#N/A	#N/A	#N/A	#N/A	#N/A	#N/A	#N/A	#N/A		LRIT3		SLC35B2		GFER	CLCNKB			CIZ1
sp|Q96T51|RUFY1_HUMAN	RUFY1	RUFY1_HUMAN RUN and FYVE domain-containing protein 1	5	332.734	370.621	351.678	356.523	332.373	344.448	0.979443	-0.0299668	353.925	319.627	336.776	0.957627	-0.0624637	331.871	347.313	339.592	0.965635	-0.0504506	322.926	422.092	372.509	1.05923	0.0830222	#N/A	#N/A	#N/A	#N/A	#N/A	#N/A	RUFY1	#N/A	#N/A	#N/A	#N/A	#N/A	#N/A		LSS		SLC35B3		GFM1	CLDN1			CLASRP
sp|O15126|SCAM1_HUMAN	SCAMP1	SCAM1_HUMAN Secretory carrier-associated membrane protein 1	16	5496.17	4907.85	5202.01	6448.22	6291.91	6370.07	1.22454	0.292239	6675.8	5554.25	6115.02	1.17551	0.233289	5260.14	5737.17	5498.66	1.05703	0.0800096	4834.76	4125.94	4480.35	0.861273	-0.215458	#N/A	#N/A	#N/A	#N/A	#N/A	#N/A	SCAMP1	#N/A	#N/A	#N/A	#N/A	#N/A	#N/A		MAN1B1		SLC35B4		GFM2	CLDN10			CLK1
sp|O15127|SCAM2_HUMAN	SCAMP2	SCAM2_HUMAN Secretory carrier-associated membrane protein 2	6	1848.88	1700.79	1774.84	2288.19	2245.37	2266.78	1.27718	0.352959	2268.83	1931.8	2100.32	1.18339	0.242921	1874.27	2191.96	2033.12	1.14552	0.196007	1720.43	1362.9	1541.66	0.868624	-0.203196	#N/A	#N/A	#N/A	#N/A	#N/A	#N/A	SCAMP2	#N/A	#N/A	#N/A	#N/A	#N/A	#N/A		MARCH6		SLC35C1		GHITM	CLDN11			CLK2
sp|O14828|SCAM3_HUMAN	SCAMP3	SCAM3_HUMAN Secretory carrier-associated membrane protein 3	23	3556.88	3439.79	3498.34	5253.8	5386.99	5320.4	1.52084	0.604865	3952.99	3365.63	3659.31	1.04601	0.0649032	3231.39	3491.93	3361.66	0.960931	-0.0574946	3049.9	2872.21	2961.06	0.846418	-0.240557	#N/A	#N/A	#N/A	#N/A	#N/A	#N/A	#N/A	#N/A	#N/A	#N/A	#N/A	#N/A	#N/A		MBOAT4		SLC35D2		GLDC	CLDN12			CLK4
sp|Q969E2|SCAM4_HUMAN	SCAMP4	SCAM4_HUMAN Secretory carrier-associated membrane protein 4	10	1148.88	1081.57	1115.22	1312.56	1335.34	1323.95	1.18716	0.247514	1375.56	1207.96	1291.76	1.1583	0.212003	1112.38	1278.36	1195.37	1.07186	0.100122	1040.35	989.48	1014.91	0.910054	-0.135976	#N/A	#N/A	#N/A	#N/A	#N/A	#N/A	#N/A	#N/A	#N/A	#N/A	#N/A	#N/A	#N/A		MBOAT7		SLC39A13		GLOD4	CLDN14			CLP1
sp|O00560-2|SDCB1_HUMAN	SDCBP	SDCB1_HUMAN Isoform 2 of Syntenin-1	2	485.949	491.689	488.819	668.266	630.822	649.544	1.3288	0.410127	585.854	504.978	545.416	1.11578	0.158057	542.4	593.396	567.898	1.16178	0.216331	420.385	483.72	452.053	0.924785	-0.11281	#N/A	#N/A	#N/A	#N/A	#N/A	#N/A	#N/A	#N/A	#N/A	#N/A	#N/A	#N/A	#N/A		MESD		SLC9A8		GLRX5	CLDN15			CLSPN
sp|O00560|SDCB1_HUMAN	SDCBP	SDCB1_HUMAN Syntenin-1	23	5314.97	5333.31	5324.14	7353.74	7466.09	7409.91	1.39176	0.476908	6945.03	5985.56	6465.3	1.21434	0.280168	6252.83	7351.06	6801.94	1.27757	0.353399	5370.94	5617.98	5494.46	1.03199	0.0454292	#N/A	#N/A	#N/A	#N/A	#N/A	#N/A	#N/A	#N/A	#N/A	#N/A	#N/A	#N/A	#N/A		MEST		SPATA16		GLS2	CLDN16			CLUAP1
sp|O75396|SC22B_HUMAN	SEC22B	SC22B_HUMAN Vesicle-trafficking protein SEC22b	28	6173.41	5544.06	5858.74	8730.39	8135.65	8433.02	1.43939	0.52546	7290.67	6907.27	7098.97	1.21169	0.277021	7378.42	7502.77	7440.6	1.27	0.344829	8129.67	5284.24	6706.95	1.14478	0.195069	#N/A	SEC22B	SEC22B	#N/A	#N/A	#N/A	#N/A	#N/A	#N/A	#N/A	#N/A	#N/A	#N/A		METTL7A		ST3GAL1		GLUD1	CLDN17			CMAS
sp|Q15436|SC23A_HUMAN	SEC23A	SC23A_HUMAN Protein transport protein Sec23A	10	1287.75	1271.84	1279.8	1363.88	1284.13	1324.01	1.03454	0.0489958	1431.06	1260.55	1345.8	1.05158	0.0725567	1322.95	1389.38	1356.16	1.05967	0.08362	1229.21	1434.11	1331.66	1.04053	0.057313	#N/A	#N/A	#N/A	#N/A	#N/A	#N/A	#N/A	#N/A	#N/A	#N/A	#N/A	#N/A	#N/A		MGST2		ST3GAL2		GLUD2	CLDN18			CMTR1
sp|P31947|1433S_HUMAN	SFN	1433S_HUMAN 14-3-3 protein sigma	11	1582.41	1417.01	1499.71	1683.2	1598.77	1640.99	1.0942	0.129878	1796.59	2829.58	2313.09	1.54235	0.625135	1659.66	1663.06	1661.36	1.10779	0.147681	1573.15	1308.18	1440.66	0.960629	-0.0579487	#N/A	#N/A	#N/A	#N/A	#N/A	#N/A	#N/A	#N/A	#N/A	#N/A	#N/A	#N/A	#N/A		MGST3		ST3GAL3		GLYAT	CLDN19			COIL
sp|Q99961|SH3G1_HUMAN	SH3GL1	SH3G1_HUMAN Endophilin-A2	12	1971.94	1870.63	1921.29	1668.37	1700.67	1684.52	0.876767	-0.189734	2036.79	2010.86	2023.82	1.05337	0.075013	1830.02	1788.98	1809.5	0.941818	-0.0864804	1660.69	1679.53	1670.11	0.869267	-0.202128	#N/A	#N/A	#N/A	#N/A	#N/A	#N/A	SH3GL1	#N/A	#N/A	#N/A	#N/A	#N/A	#N/A		MIA2		ST3GAL4		GPAM	CLDN2			COPRS
sp|Q99962|SH3G2_HUMAN	SH3GL2	SH3G2_HUMAN Endophilin-A1	5	680.195	642.807	661.501	644.679	602.556	623.618	0.942731	-0.0850819	712.398	684.42	698.409	1.05579	0.0783288	685.785	668.453	677.119	1.02361	0.0336661	571.515	586.091	578.803	0.874984	-0.192671	#N/A	#N/A	#N/A	#N/A	#N/A	#N/A	SH3GL2	#N/A	#N/A	#N/A	#N/A	#N/A	#N/A		MIA3		ST3GAL5		GPAT2	CLDN20			CPHXL
sp|O00161|SNP23_HUMAN	SNAP23	SNP23_HUMAN Synaptosomal-associated protein 23	14	2097.2	1958.01	2027.61	2226.17	2223.08	2224.62	1.09717	0.133786	2184.27	1927.53	2055.9	1.01395	0.0199935	1983.48	2048.79	2016.13	0.994343	-0.00818438	1973.8	1914.9	1944.35	0.958939	-0.0604887	#N/A	#N/A	#N/A	#N/A	#N/A	SNAP23	#N/A	#N/A	#N/A	#N/A	#N/A	#N/A	#N/A		MINPP1		ST3GAL6		GPD2	CLDN22			CPSF1
sp|Q5SQN1|SNP47_HUMAN	SNAP47	SNP47_HUMAN Synaptosomal-associated protein 47	3	131.668	115.1	123.384	166.848	164.086	165.467	1.34107	0.423388	113.06	126.35	119.705	0.970183	-0.0436719	107.147	111.649	109.398	0.886647	-0.173569	106.463	112.517	109.49	0.887392	-0.172356	#N/A	#N/A	#N/A	#N/A	#N/A	#N/A	#N/A	#N/A	#N/A	#N/A	#N/A	#N/A	#N/A		MLEC		ST6GAL1		GRPEL1	CLDN23			CPSF2
sp|O95295|SNAPN_HUMAN	SNAPIN	SNAPN_HUMAN SNARE-associated protein Snapin	11	1954.67	1937.92	1946.3	1305.7	1234.4	1270.05	0.652548	-0.615845	1597.79	1358.12	1477.95	0.759368	-0.397128	1533.56	1580.89	1557.22	0.800097	-0.321753	1406.3	1275.81	1341.05	0.68903	-0.537362	#N/A	#N/A	#N/A	#N/A	#N/A	#N/A	#N/A	#N/A	#N/A	#N/A	#N/A	#N/A	#N/A		MMP27		ST6GAL2		GRPEL2	CLDN24			CPSF3
sp|Q13596|SNX1_HUMAN	SNX1	SNX1_HUMAN Sorting nexin-1	3	187.007	174.639	180.823	152.919	152.67	152.794	0.844995	-0.242986	175.449	183.989	179.719	0.993895	-0.00883526	189.173	175.029	182.101	1.00707	0.0101607	171.357	166.422	168.889	0.934005	-0.0984986	#N/A	#N/A	#N/A	#N/A	#N/A	#N/A	SNX1	#N/A	#N/A	#N/A	#N/A	#N/A	#N/A		MOGAT1		ST6GALNAC1		GRSF1	CLDN25			CPSF4
sp|Q9Y5W9|SNX11_HUMAN	SNX11	SNX11_HUMAN Sorting nexin-11	3	356.622	354.818	355.72	251.752	248.556	250.154	0.703233	-0.507926	313.875	251.249	282.562	0.794338	-0.332175	308.729	349.683	329.206	0.925464	-0.111751	283.621	343.025	313.323	0.880814	-0.183091	#N/A	#N/A	#N/A	#N/A	#N/A	#N/A	SNX11	#N/A	#N/A	#N/A	#N/A	#N/A	#N/A		MOGAT2		ST6GALNAC2		GTPBP3	CLDN3			CRAMP1
sp|Q9UMY4|SNX12_HUMAN	SNX12	SNX12_HUMAN Sorting nexin-12	8	2187.12	1979.33	2083.22	2261.51	2211.91	2236.71	1.07368	0.10256	2395.25	2257.65	2326.45	1.11675	0.159312	2300.77	2390.11	2345.44	1.12587	0.17104	1993.02	1903.07	1948.05	0.93511	-0.0967917	#N/A	#N/A	#N/A	#N/A	#N/A	#N/A	#N/A	#N/A	#N/A	#N/A	#N/A	#N/A	#N/A		MOGAT3		ST6GALNAC3		GUF1	CLDN34			CREB1
sp|Q9NRS6|SNX15_HUMAN	SNX15	SNX15_HUMAN Sorting nexin-15	1	49.7483	51.4336	50.5909	44.331	49.6927	47.0119	0.929254	-0.105855	35.8701	37.6887	36.7794	0.726996	-0.459981	43.4434	45.4321	44.4377	0.878374	-0.187094	40.5112	37.6988	39.105	0.772964	-0.371526	#N/A	#N/A	#N/A	#N/A	#N/A	#N/A	#N/A	#N/A	#N/A	#N/A	#N/A	#N/A	#N/A		MOGS		ST6GALNAC4		HADH	CLDN4			CREB5
sp|P57768|SNX16_HUMAN	SNX16	SNX16_HUMAN Sorting nexin-16	4	560.906	549.506	555.206	292.901	321.995	307.448	0.553755	-0.852681	428.126	351.065	389.596	0.701713	-0.511046	474.929	514.863	494.896	0.891374	-0.165898	414.007	550.612	482.309	0.868704	-0.203064	#N/A	#N/A	#N/A	#N/A	#N/A	#N/A	SNX16	#N/A	#N/A	#N/A	#N/A	#N/A	#N/A		MOXD1		ST6GALNAC5		HADHA	CLDN5			CREBL2
sp|Q15036|SNX17_HUMAN	SNX17	SNX17_HUMAN Sorting nexin-17	3	175.891	160.632	168.262	190.587	169.503	180.045	1.07003	0.0976524	173.605	162.785	168.195	0.999605	-0.000570292	175.417	189.201	182.309	1.08349	0.115681	192.824	220.564	206.694	1.22841	0.296791	#N/A	#N/A	#N/A	#N/A	#N/A	#N/A	SNX17	#N/A	#N/A	#N/A	#N/A	#N/A	#N/A		MSMO1		ST6GALNAC6		HAGH	CLDN6			CREBRF
sp|O60749|SNX2_HUMAN	SNX2	SNX2_HUMAN Sorting nexin-2	2	169.401	158.085	163.743	196.303	180.243	188.273	1.14981	0.201393	173.548	172.913	173.231	1.05794	0.0812597	186.82	207.876	197.348	1.20523	0.269309	162.134	172.539	167.337	1.02195	0.0313189	#N/A	#N/A	#N/A	#N/A	#N/A	#N/A	SNX2	#N/A	#N/A	#N/A	#N/A	#N/A	#N/A		MTTP		ST8SIA1		HARS2	CLDN7			CREBZF
sp|Q96L92|SNX27_HUMAN	SNX27	SNX27_HUMAN Sorting nexin-27	1	162.031	205.313	183.672	126.521	125.321	125.921	0.685575	-0.544613	146.566	140.839	143.702	0.782387	-0.354047	154.788	159.528	157.158	0.855645	-0.224916	144.811	260.133	202.472	1.10236	0.140591	#N/A	#N/A	#N/A	#N/A	#N/A	#N/A	SNX27	#N/A	#N/A	#N/A	#N/A	#N/A	#N/A		NBEAL2		ST8SIA2		HCCS	CLDN8			CRNKL1
sp|O60493|SNX3_HUMAN	SNX3	SNX3_HUMAN Sorting nexin-3	7	1148.72	1046.54	1097.63	1064.11	1093.37	1078.74	0.98279	-0.0250446	1150.76	1126.34	1138.55	1.03728	0.0528058	1207.18	1210.37	1208.78	1.10126	0.139154	1039.76	974.184	1006.97	0.917406	-0.124368	#N/A	#N/A	#N/A	#N/A	#N/A	#N/A	SNX3	#N/A	#N/A	#N/A	#N/A	#N/A	#N/A		NCEH1		ST8SIA3		HEMK1	CLDN9			CRX
sp|Q8WV41|SNX33_HUMAN	SNX33	SNX33_HUMAN Sorting nexin-33	1	21.1553	26.4673	23.8113	13.9022	13.7427	13.8224	0.5805	-0.784633	17.1285	19.0999	18.1142	0.76074	-0.394525	18.6339	19.5128	19.0733	0.801021	-0.320088	15.6442	20.879	18.2616	0.76693	-0.382833	#N/A	#N/A	#N/A	#N/A	#N/A	#N/A	#N/A	#N/A	#N/A	#N/A	#N/A	#N/A	#N/A		NCLN		ST8SIA4		HIBADH	CLEC12A			CSNK2A1
sp|Q9Y5X3|SNX5_HUMAN	SNX5	SNX5_HUMAN Sorting nexin-5	1	127.664	130.204	128.934	121.902	114.519	118.21	0.91683	-0.125275	151.477	133.899	142.688	1.10667	0.146231	129.465	123.547	126.506	0.981169	-0.0274269	104.964	98.8221	101.893	0.790273	-0.339577	#N/A	#N/A	#N/A	#N/A	#N/A	#N/A	SNX5	#N/A	#N/A	#N/A	#N/A	#N/A	#N/A		NOMO2		ST8SIA5		HIBCH	CLEC12B			CSNKA2IP
sp|Q9UNH7|SNX6_HUMAN	SNX6	SNX6_HUMAN Sorting nexin-6	6	733.483	799.936	766.709	669.425	664.025	666.725	0.869593	-0.201588	777.796	769.825	773.811	1.00926	0.0133002	788.804	825.042	806.923	1.05245	0.073751	673.675	828.303	750.989	0.979496	-0.0298883	#N/A	#N/A	#N/A	#N/A	#N/A	#N/A	SNX6	#N/A	#N/A	#N/A	#N/A	#N/A	#N/A		NOX5		ST8SIA6		HIGD1A	CLEC2A			CSRNP1
sp|Q96JI7|SPTCS_HUMAN	SPG11	SPTCS_HUMAN Spatacsin	3	133.605	126.552	130.078	88.2267	85.9829	87.1048	0.669633	-0.578558	97.9149	94.1011	96.008	0.738077	-0.438156	92.5784	109.034	100.806	0.774964	-0.367798	96.556	91.8709	94.2134	0.724281	-0.465378	#N/A	#N/A	#N/A	#N/A	#N/A	#N/A	#N/A	#N/A	#N/A	#N/A	#N/A	#N/A	#N/A		NSDHL		STMN4		HIGD2A	CLEC4A			CSRNP2
sp|Q8N0X7|SPG20_HUMAN	SPG20	SPG20_HUMAN Spartin	12	1735.65	1654.86	1695.26	1658.47	1534.41	1596.44	0.941711	-0.086644	1659.78	1744.01	1701.89	1.00392	0.00563973	1755.53	1670.06	1712.8	1.01035	0.0148502	1276.6	1731.08	1503.84	0.887088	-0.172851	#N/A	#N/A	#N/A	#N/A	#N/A	#N/A	#N/A	#N/A	#N/A	#N/A	#N/A	#N/A	#N/A		NUS1		STX10		HINT2	CLEC4C			CSRNP3
sp|Q9NZD8|SPG21_HUMAN	SPG21	SPG21_HUMAN Maspardin	4	960.936	1020.87	990.903	1076.39	1044.97	1060.68	1.07042	0.0981737	1114.68	882.348	998.514	1.00768	0.0110388	864.945	957.91	911.428	0.919795	-0.120616	755.08	806.421	780.751	0.787918	-0.343882	#N/A	#N/A	#N/A	#N/A	#N/A	#N/A	#N/A	#N/A	#N/A	#N/A	#N/A	#N/A	#N/A		ORMDL1		STX11		HMGCS2	CLEC4G			CSRP1
sp|O60499|STX10_HUMAN	STX10	STX10_HUMAN Syntaxin-10	7	921.065	594.555	757.81	1120.11	1160.21	1140.16	1.50455	0.589328	1076.72	1016.48	1046.6	1.38108	0.465802	1056.18	1132.03	1094.11	1.44377	0.529843	1173.88	368.631	771.255	1.01774	0.0253727	#N/A	#N/A	STX10	#N/A	#N/A	#N/A	#N/A	#N/A	#N/A	#N/A	#N/A	#N/A	#N/A		ORMDL2		STX6		HOGA1	CLEC5A			CSRP2
sp|Q86Y82|STX12_HUMAN	STX12	STX12_HUMAN Syntaxin-12	16	2642.31	2636.54	2639.43	2982.84	3010.94	2996.89	1.13543	0.183242	3005.32	2619.75	2812.53	1.06559	0.0916474	2746.17	3010.46	2878.32	1.09051	0.125001	2667.99	2220.49	2444.24	0.92605	-0.110838	#N/A	#N/A	#N/A	#N/A	#N/A	#N/A	#N/A	#N/A	#N/A	#N/A	#N/A	#N/A	#N/A		ORMDL3		SYN1		HRK	CLECL1			CSTF1
sp|O14662-4|STX16_HUMAN	STX16	STX16_HUMAN Isoform D of Syntaxin-16	13	1018.84	942.794	980.817	1175.96	1154.6	1165.28	1.18807	0.248621	1192.68	1069.89	1131.29	1.15341	0.205907	1203.77	1266.45	1235.11	1.25927	0.332584	1226.14	1123.23	1174.68	1.19766	0.260218	#N/A	#N/A	#N/A	#N/A	#N/A	#N/A	#N/A	#N/A	#N/A	#N/A	#N/A	#N/A	#N/A		OS9		SYNDIG1L		HSD17B10	CLMP			CSTF2
sp|P32856|STX2_HUMAN	STX2	STX2_HUMAN Syntaxin-2	1	104.482	89.3483	96.9151	110.284	108.379	109.332	1.12812	0.173915	105.49	94.2084	99.8492	1.03027	0.0430287	105.68	101.583	103.632	1.0693	0.0966685	110.452	76.7513	93.6017	0.96581	-0.0501882	#N/A	#N/A	#N/A	#N/A	#N/A	#N/A	#N/A	#N/A	#N/A	#N/A	#N/A	#N/A	#N/A		OSBPL5		SYS1		HSD17B8	CLRN1			CSTF2T
sp|Q13277|STX3_HUMAN	STX3	STX3_HUMAN Syntaxin-3	5	1587.34	1476.98	1532.16	1798.31	1710.45	1754.38	1.14504	0.195394	1721.62	1522.05	1621.84	1.05853	0.0820601	1572.44	1673.79	1623.12	1.05936	0.0831983	1529.64	1256.94	1393.29	0.909363	-0.137071	#N/A	#N/A	#N/A	#N/A	#N/A	#N/A	#N/A	#N/A	#N/A	#N/A	#N/A	#N/A	#N/A		OST4		TANGO2		HSDL1	CLTRN			CSTF3
sp|Q12846|STX4_HUMAN	STX4	STX4_HUMAN Syntaxin-4	6	788.952	774.92	781.936	867.612	857.167	862.389	1.10289	0.141289	803.807	860.207	832.007	1.06403	0.0895451	898.177	864.897	881.537	1.12738	0.172971	951.562	811.23	881.396	1.1272	0.17274	#N/A	#N/A	#N/A	#N/A	#N/A	STX4	#N/A	#N/A	#N/A	#N/A	#N/A	#N/A	#N/A		OSTC		TBC1D14		HSPD1	CMKLR1			CTBP2
sp|Q13190|STX5_HUMAN	STX5	STX5_HUMAN Syntaxin-5	5	443.261	513.727	478.494	485.374	509.137	497.255	1.03921	0.0554865	506.924	466.822	486.873	1.01751	0.0250447	495.017	496.753	495.885	1.03635	0.0515048	513.738	572.199	542.968	1.13474	0.182368	#N/A	STX5	#N/A	#N/A	#N/A	#N/A	#N/A	#N/A	#N/A	#N/A	#N/A	#N/A	#N/A		P3H3		TBC1D23		HSPE1	CNGA1			CTC1
sp|O43752|STX6_HUMAN	STX6	STX6_HUMAN Syntaxin-6	5	311.909	314.806	313.357	346.227	340.34	343.284	1.0955	0.131591	386.067	341.755	363.911	1.16133	0.215776	353.072	370.619	361.846	1.15474	0.207564	400.403	366.212	383.308	1.22323	0.290693	#N/A	#N/A	STX6	#N/A	#N/A	#N/A	#N/A	#N/A	#N/A	#N/A	#N/A	#N/A	#N/A		P3H4		TM9SF4		HTD2	CNIH3			CTCF
sp|O15400|STX7_HUMAN	STX7	STX7_HUMAN Syntaxin-7	21	6160.04	6114.04	6137.04	6777.13	6527.81	6652.47	1.08399	0.116347	6368.62	5436.99	5902.81	0.961833	-0.0561423	5518.53	6233.18	5875.85	0.957441	-0.0627442	5284.06	4614.43	4949.25	0.806455	-0.310335	#N/A	#N/A	#N/A	#N/A	#N/A	#N/A	STX7	#N/A	#N/A	#N/A	#N/A	#N/A	#N/A		P4HA1		TMBIM4		IARS2	CNNM1			CTDSP1
sp|Q9UNK0|STX8_HUMAN	STX8	STX8_HUMAN Syntaxin-8	11	4294.92	4148.3	4221.61	4364.99	4304.83	4334.91	1.02684	0.0382087	4000.07	3462.73	3731.4	0.883881	-0.178076	3581.54	4123.09	3852.32	0.912523	-0.132068	3279.22	2372.48	2825.85	0.669377	-0.579108	#N/A	#N/A	#N/A	#N/A	#N/A	#N/A	#N/A	#N/A	#N/A	#N/A	#N/A	#N/A	#N/A		P4HA2		TMED1		IBA57	CNNM2			CTDSP2
sp|P61764-2|STXB1_HUMAN	STXBP1	STXB1_HUMAN Isoform 2 of Syntaxin-binding protein 1	4	1279.89	1331.6	1305.74	1400.48	1380.56	1390.52	1.06492	0.0907513	1426.57	1359.15	1392.86	1.06672	0.0931771	1341.89	1368.2	1355.05	1.03776	0.0534676	1233.59	1255.7	1244.64	0.953207	-0.0691389	#N/A	#N/A	#N/A	#N/A	#N/A	#N/A	#N/A	#N/A	#N/A	#N/A	#N/A	#N/A	#N/A		P4HA3		TMED10		IDH2	CNNM3			CTDSPL
sp|Q15833|STXB2_HUMAN	STXBP2	STXB2_HUMAN Syntaxin-binding protein 2	2	314.351	316.288	315.32	241.774	241.984	241.879	0.767092	-0.382529	230.394	254.488	242.441	0.768874	-0.379181	273.498	226.997	250.248	0.793632	-0.333459	229.039	335.035	282.037	0.894448	-0.16093	#N/A	#N/A	#N/A	#N/A	#N/A	#N/A	#N/A	#N/A	#N/A	#N/A	#N/A	#N/A	#N/A		P4HTM		TMED2		IDH3A	CNNM4			CTNND2
sp|Q5T5C0|STXB5_HUMAN	STXBP5	STXB5_HUMAN Syntaxin-binding protein 5	1	223.689	247.21	235.45	175.244	176.416	175.83	0.746784	-0.421236	210.514	202.413	206.464	0.876891	-0.189531	197.823	195.746	196.785	0.835782	-0.258801	163.529	193.601	178.565	0.7584	-0.398968	#N/A	#N/A	#N/A	#N/A	#N/A	#N/A	#N/A	#N/A	#N/A	#N/A	#N/A	#N/A	#N/A		PAPPA-AS1		TMED3		IDH3B	CNR2			CTR9
sp|Q96C24|SYTL4_HUMAN	SYTL4	SYTL4_HUMAN Synaptotagmin-like protein 4	1	26.7656	22.7228	24.7442	22.1194	25.5482	23.8338	0.963208	-0.0540814	28.9506	27.4076	28.1791	1.13882	0.187535	28.0155	28.1421	28.0788	1.13476	0.182391	22.8563	42.691	32.7737	1.3245	0.405446	#N/A	#N/A	#N/A	#N/A	#N/A	#N/A	#N/A	#N/A	#N/A	#N/A	#N/A	#N/A	#N/A		PARP16		TMED5		IDH3G	CNTFR			CUL4B
sp|Q4KMP7|TB10B_HUMAN	TBC1D10B	TB10B_HUMAN TBC1 domain family member 10B	1	61.5367	65.2467	63.3917	60.1812	58.0598	59.1205	0.932622	-0.100635	63.3787	67.1592	65.269	1.02961	0.0421029	70.4003	55.4209	62.9106	0.992411	-0.0109908	57.2819	35.3948	46.3383	0.730984	-0.452087	#N/A	#N/A	#N/A	#N/A	#N/A	#N/A	#N/A	#N/A	#N/A	TBC1D10B	#N/A	#N/A	#N/A		PCYT1B		TMED7		IFI27L2	CNTN1			CUSTOS
sp|Q9BYX2|TBD2A_HUMAN	TBC1D2	TBD2A_HUMAN TBC1 domain family member 2A	1	60.1742	72.8964	66.5353	59.4799	57.1308	58.3054	0.876307	-0.190492	65.0705	72.2768	68.6736	1.03214	0.0456367	60.7964	57.4	59.0982	0.888223	-0.171006	49.0497	79.1425	64.0961	0.96334	-0.0538834	#N/A	#N/A	#N/A	#N/A	#N/A	#N/A	#N/A	#N/A	#N/A	#N/A	#N/A	#N/A	#N/A		PDIA2		TMED9		IFI6	CNTN2			CUX1
sp|Q9NUY8|TBC23_HUMAN	TBC1D23	TBC23_HUMAN TBC1 domain family member 23	1	30.7843	28.1893	29.4868	26.7628	22.2911	24.5269	0.831794	-0.265701	28.5178	28.3222	28.42	0.963821	-0.0531627	20.5044	23.608	22.0562	0.748002	-0.418885	21.5884	28.1907	24.8895	0.844091	-0.244529	#N/A	#N/A	TBC1D23	#N/A	#N/A	#N/A	#N/A	#N/A	#N/A	#N/A	#N/A	#N/A	#N/A		PDIA3		TMEM115		IMMP1L	CNTN3			CUX2
sp|O60343|TBCD4_HUMAN	TBC1D4	TBCD4_HUMAN TBC1 domain family member 4	1	26.1808	20.3227	23.2518	34.1821	33.5896	33.8858	1.45735	0.543344	32.7228	28.8023	30.7625	1.32302	0.403836	29.6793	31.7949	30.7371	1.32193	0.402642	23.2967	24.976	24.1364	1.03804	0.0538682	#N/A	#N/A	#N/A	#N/A	#N/A	#N/A	#N/A	#N/A	#N/A	#N/A	#N/A	#N/A	#N/A		PDIA4		TMEM130		IMMP2L	CNTN5			CWC15
sp|Q92609-2|TBCD5_HUMAN	TBC1D5	TBCD5_HUMAN Isoform 2 of TBC1 domain family member 5	1	67.5287	49.3763	58.4525	29.1509	37.5923	33.3716	0.570918	-0.808644	45.1593	36.5191	40.8392	0.698673	-0.51731	46.2851	50.1884	48.2368	0.82523	-0.277132	50.6277	48.6722	49.6499	0.849407	-0.235472	#N/A	#N/A	#N/A	#N/A	#N/A	#N/A	TBC1D5	#N/A	#N/A	#N/A	#N/A	#N/A	#N/A		PDIA5		TMEM165		IMMT	CNTN6			CWC22
sp|Q6ZT07|TBCD9_HUMAN	TBC1D9	TBCD9_HUMAN TBC1 domain family member 9	1	82.9843	81.9307	82.4575	72.3211	65.9135	69.1173	0.838217	-0.254604	74.5481	80.0656	77.3068	0.937536	-0.0930545	74.9114	72.6099	73.7606	0.894529	-0.160799	76.7985	80.4212	78.6098	0.953338	-0.0689406	#N/A	#N/A	#N/A	#N/A	#N/A	#N/A	#N/A	#N/A	#N/A	#N/A	#N/A	#N/A	#N/A		PDILT		TMEM167A		ISCA1	CNTNAP4			CWC25
sp|Q9BXS4|TMM59_HUMAN	TMEM59	TMM59_HUMAN Transmembrane protein 59	11	3009.26	2782.46	2895.86	2530.81	2535.73	2533.27	0.87479	-0.192991	2864.36	2267.79	2566.07	0.886118	-0.174429	3065.42	2928.08	2996.75	1.03484	0.0494069	4021.96	4265.69	4143.82	1.43095	0.516971	#N/A	#N/A	#N/A	#N/A	#N/A	#N/A	#N/A	#N/A	#N/A	#N/A	#N/A	#N/A	#N/A		PDZD8		TMEM167B		ISCA2	COL13A1			CWC27
sp|Q9NZ43|USE1_HUMAN	USE1	USE1_HUMAN Vesicle transport protein USE1	1	36.4524	45.3717	40.912	49.5294	46.351	47.9402	1.17179	0.22871	34.4954	37.1398	35.8176	0.875478	-0.191857	42.065	39.4838	40.7744	0.996635	-0.00486218	41.8043	34.689	38.2467	0.93485	-0.0971924	USE1	#N/A	#N/A	#N/A	#N/A	#N/A	#N/A	#N/A	#N/A	#N/A	#N/A	#N/A	#N/A		PGAP1		TMEM230		IVD	COL23A1			CXXC1
sp|Q08AM6|VAC14_HUMAN	VAC14	VAC14_HUMAN Protein VAC14 homolog	2	466.744	447.004	456.874	417.173	382.11	399.642	0.87473	-0.19309	444.735	388.906	416.821	0.912331	-0.13237	409.828	450.875	430.351	0.941948	-0.0862808	326.693	367.481	347.087	0.7597	-0.396499	#N/A	#N/A	#N/A	#N/A	#N/A	#N/A	VAC14	#N/A	#N/A	#N/A	#N/A	#N/A	#N/A		PGRMC1		TMEM59L		KMO	CPD			DACH1
sp|P63027|VAMP2_HUMAN	VAMP2	VAMP2_HUMAN Vesicle-associated membrane protein 2	12	2606.7	2527.76	2567.23	3945.34	3852.83	3899.09	1.51879	0.602923	3468.62	3111.58	3290.1	1.28158	0.357919	2856.57	3063.5	2960.03	1.15301	0.205402	2611.39	2203.87	2407.63	0.937832	-0.0925989	#N/A	#N/A	#N/A	#N/A	#N/A	#N/A	#N/A	#N/A	#N/A	#N/A	#N/A	#N/A	#N/A		PIEZO1		TMEM79		L2HGDH	CPLX3			DACH2
sp|Q15836|VAMP3_HUMAN	VAMP3	VAMP3_HUMAN Vesicle-associated membrane protein 3	5	446.203	412.135	429.169	752.829	734.106	743.467	1.73234	0.792724	679.507	645.103	662.305	1.54323	0.62595	604.19	633.125	618.658	1.44152	0.527595	531.569	466.971	499.27	1.16334	0.218274	#N/A	#N/A	#N/A	#N/A	#N/A	#N/A	#N/A	#N/A	#N/A	#N/A	#N/A	#N/A	#N/A		PIGA		TMEM87A		LACTB	CPLX4			DBF4
sp|O75379|VAMP4_HUMAN	VAMP4	VAMP4_HUMAN Vesicle-associated membrane protein 4	1	90.3466	99.7537	95.0502	120.788	137.606	129.197	1.35925	0.442812	136.567	107.775	122.171	1.28533	0.362141	109.239	115.071	112.155	1.17996	0.238733	116.898	98.8739	107.886	1.13504	0.182746	#N/A	#N/A	#N/A	#N/A	#N/A	#N/A	#N/A	#N/A	#N/A	#N/A	#N/A	#N/A	#N/A		PIGB		TMEM87B		LACTB2	CPM			DBF4B
sp|P51809|VAMP7_HUMAN	VAMP7	VAMP7_HUMAN Vesicle-associated membrane protein 7	26	7366.08	7602.64	7484.36	9447.6	9419.1	9433.35	1.26041	0.333891	7033.21	6025.86	6529.53	0.872424	-0.196899	5584.77	6305.26	5945.02	0.794325	-0.332199	5282.26	4540.59	4911.43	0.656225	-0.607737	#N/A	#N/A	#N/A	#N/A	#N/A	#N/A	#N/A	#N/A	#N/A	#N/A	#N/A	#N/A	#N/A		PIGC		TPST1		LARS2	CPO			DBP
sp|Q9H270|VPS11_HUMAN	VPS11	VPS11_HUMAN Vacuolar protein sorting-associated protein 11 homolog	1	116.547	131.589	124.068	96.2395	89.831	93.0353	0.749873	-0.415282	105.885	74.5338	90.2094	0.727096	-0.459781	83.926	103.422	93.674	0.755021	-0.40541	74.3576	112.716	93.5368	0.753916	-0.407525	#N/A	#N/A	#N/A	#N/A	#N/A	#N/A	VPS11	#N/A	#N/A	#N/A	#N/A	#N/A	#N/A		PIGF		TPST2		LDHD	CR2			DBR1
sp|Q96RL7|VP13A_HUMAN	VPS13A	VP13A_HUMAN Vacuolar protein sorting-associated protein 13A	27	3488.63	4072.72	3780.68	3807.13	3370.31	3588.72	0.949227	-0.0751745	3512.72	3366.73	3439.72	0.909818	-0.136351	3798.53	4040.13	3919.33	1.03667	0.0519632	3083.71	3738.82	3411.27	0.90229	-0.148337	#N/A	#N/A	#N/A	#N/A	#N/A	#N/A	#N/A	#N/A	#N/A	#N/A	#N/A	#N/A	#N/A		PIGG		TRAPPC1		LETM1	CRB3			DBX1
sp|Q709C8|VP13C_HUMAN	VPS13C	VP13C_HUMAN Vacuolar protein sorting-associated protein 13C	97	15216.1	15626.7	15421.4	22816.5	18576.3	20696.4	1.34206	0.424446	18338	15567.9	16953	1.09931	0.136603	15556.1	15322.1	15439.1	1.00115	0.00165491	11033.3	16247.1	13640.2	0.884498	-0.177069	#N/A	#N/A	#N/A	#N/A	VPS13C	#N/A	#N/A	#N/A	#N/A	#N/A	#N/A	#N/A	#N/A		PIGK		TRAPPC10		LETM2	CRHR2			DBX2
sp|Q9H269|VPS16_HUMAN	VPS16	VPS16_HUMAN Vacuolar protein sorting-associated protein 16 homolog	12	2524.95	2624.15	2574.55	2136.62	2176.32	2156.47	0.83761	-0.255649	1955.66	1681.74	1818.7	0.706415	-0.501413	1848.13	1935.95	1892.04	0.734901	-0.444378	1611.16	1924.24	1767.7	0.686605	-0.542447	#N/A	#N/A	#N/A	#N/A	#N/A	#N/A	VPS16	#N/A	#N/A	#N/A	#N/A	#N/A	#N/A		PIGL		TRAPPC11		LETMD1	CSF1R			DCAF13
sp|Q9P253|VPS18_HUMAN	VPS18	VPS18_HUMAN Vacuolar protein sorting-associated protein 18 homolog	4	471.351	575.598	523.475	428.065	450.209	439.137	0.838889	-0.253448	383.976	368.328	376.152	0.718568	-0.476803	411.278	405.228	408.253	0.779891	-0.358656	344.96	409.85	377.405	0.720962	-0.472006	#N/A	#N/A	#N/A	#N/A	#N/A	#N/A	VPS18	#N/A	#N/A	#N/A	#N/A	#N/A	#N/A		PIGM		TRAPPC2L		LIAS	CSMD2			DCAF16
sp|O75436|VP26A_HUMAN	VPS26A	VP26A_HUMAN Vacuolar protein sorting-associated protein 26A	9	1559.8	1544.04	1551.92	1324	1281.88	1302.94	0.839566	-0.252284	1528.34	1455.59	1491.96	0.961367	-0.0568405	1472.92	1492.75	1482.84	0.955484	-0.0656961	1286.54	1482.93	1384.74	0.892272	-0.164444	#N/A	#N/A	#N/A	#N/A	#N/A	#N/A	VPS26A	#N/A	#N/A	#N/A	#N/A	#N/A	#N/A		PIGN		TRAPPC3		LIPT1	CSMD3			DCAF17
sp|Q4G0F5|VP26B_HUMAN	VPS26B	VP26B_HUMAN Vacuolar protein sorting-associated protein 26B	1	82.3323	73.8148	78.0736	98.5471	79.302	88.9246	1.13898	0.187748	86.4935	77.6118	82.0526	1.05097	0.0717161	83.807	81.551	82.679	1.05899	0.0826871	77.4259	54.0857	65.7558	0.842229	-0.247716	#N/A	#N/A	#N/A	#N/A	#N/A	#N/A	VPS26B	#N/A	#N/A	#N/A	#N/A	#N/A	#N/A		PIGO		TRAPPC3L		LIPT2	CSPG4			DCAF6
sp|Q9UBQ0-2|VPS29_HUMAN	VPS29	VPS29_HUMAN Isoform 2 of Vacuolar protein sorting-associated protein 29	5	1346.39	1329.45	1337.92	1164.87	1130.69	1147.78	0.857884	-0.221146	1359.25	1109.46	1234.36	0.922593	-0.116234	1204.62	1318.21	1261.41	0.942818	-0.0849489	1044.96	943.325	994.143	0.743051	-0.428467	#N/A	#N/A	#N/A	#N/A	#N/A	#N/A	VPS29	#N/A	#N/A	#N/A	#N/A	#N/A	#N/A		PIGS		TRAPPC4		LONP1	CT83			DCK
sp|Q96AX1|VP33A_HUMAN	VPS33A	VP33A_HUMAN Vacuolar protein sorting-associated protein 33A	7	1080.78	1122.88	1101.83	942.279	895.184	918.731	0.833823	-0.262186	853.094	777.123	815.109	0.739777	-0.434838	838.451	833.807	836.129	0.758855	-0.398104	750.963	835.226	793.094	0.719798	-0.474337	#N/A	#N/A	#N/A	#N/A	#N/A	#N/A	VPS33A	#N/A	#N/A	#N/A	#N/A	#N/A	#N/A		PIGT		TRAPPC5		LYRM7	CTLA4			DCLRE1A
sp|Q9H267|VP33B_HUMAN	VPS33B	VP33B_HUMAN Vacuolar protein sorting-associated protein 33B	2	107.632	109.856	108.744	102.245	92.0056	97.1253	0.893155	-0.163017	108.996	102.352	105.674	0.971769	-0.0413153	111.5	103.247	107.374	0.987397	-0.0182978	107.154	101.632	104.393	0.959989	-0.0589108	#N/A	#N/A	#N/A	#N/A	#N/A	#N/A	VPS33B	#N/A	#N/A	#N/A	#N/A	#N/A	#N/A		PIGU		TRAPPC6A		MAIP1	CX3CR1			DCLRE1C
sp|Q96QK1|VPS35_HUMAN	VPS35	VPS35_HUMAN Vacuolar protein sorting-associated protein 35	19	2828.16	2822.7	2825.43	2578.2	2430.45	2504.32	0.886352	-0.174049	2913.35	2539.87	2726.61	0.965025	-0.0513621	2655.55	2868.18	2761.86	0.977503	-0.0328276	2371.03	2433.24	2402.14	0.850184	-0.234153	#N/A	#N/A	#N/A	#N/A	#N/A	#N/A	VPS35	#N/A	#N/A	#N/A	#N/A	#N/A	#N/A		PIGV		TRAPPC6B		MALSU1	CXCR1			DCUN1D1
sp|Q96JC1|VPS39_HUMAN	VPS39	VPS39_HUMAN Vam6/Vps39-like protein	5	554.756	544.398	549.577	508.804	496.143	502.473	0.914291	-0.129274	490.282	407.548	448.915	0.816837	-0.291879	445.123	483.399	464.261	0.844761	-0.243386	430.731	545.802	488.267	0.888441	-0.170653	#N/A	#N/A	#N/A	#N/A	#N/A	#N/A	VPS39	#N/A	#N/A	#N/A	#N/A	#N/A	#N/A		PIGW		TRAPPC8		MARC1	CXCR2			DDB2
sp|P49754|VPS41_HUMAN	VPS41	VPS41_HUMAN Vacuolar protein sorting-associated protein 41 homolog	7	2118.78	2363	2240.89	1754.81	1663.9	1709.36	0.762802	-0.39062	1558.87	1404.79	1481.83	0.661269	-0.596692	1610.94	1630.02	1620.48	0.723141	-0.467651	1366.75	2001.75	1684.25	0.751599	-0.411966	#N/A	#N/A	VPS41	#N/A	#N/A	#N/A	VPS41	#N/A	#N/A	#N/A	#N/A	#N/A	#N/A		PIGX		TRAPPC9		MARS2	CXCR3			DDX11L8
sp|Q9NRW7|VPS45_HUMAN	VPS45	VPS45_HUMAN Vacuolar protein sorting-associated protein 45	9	848.892	832.612	840.752	868.981	864.868	866.925	1.03113	0.044226	856.628	825.993	841.311	1.00066	0.000958044	903.475	962.926	933.201	1.10996	0.150507	871.441	936.577	904.009	1.07524	0.104657	#N/A	#N/A	VPS45	#N/A	#N/A	#N/A	#N/A	#N/A	#N/A	#N/A	#N/A	#N/A	#N/A		PIGY		UGCG		MCAT	CXCR5			DDX12P
sp|Q96AJ9|VTI1A_HUMAN	VTI1A	VTI1A_HUMAN Vesicle transport through interaction with t-SNAREs homolog 1A	7	525.957	504.292	515.125	621.921	624.247	623.084	1.20958	0.274506	613.63	556.483	585.056	1.13576	0.183655	558.772	600.313	579.543	1.12505	0.169993	609.258	569.634	589.446	1.14428	0.194438	#N/A	#N/A	#N/A	#N/A	#N/A	#N/A	#N/A	#N/A	#N/A	#N/A	#N/A	#N/A	#N/A		PIGZ		USP32		MCCC1	CXCR6			DDX18
sp|Q9UEU0|VTI1B_HUMAN	VTI1B	VTI1B_HUMAN Vesicle transport through interaction with t-SNAREs homolog 1B	18	3668.41	3556.58	3612.49	3817.09	3870.86	3843.98	1.06408	0.0896034	3642.23	3165.86	3404.05	0.942297	-0.0857455	2923.88	3605.56	3264.72	0.90373	-0.146036	3202.71	2400.29	2801.5	0.775503	-0.366796	#N/A	#N/A	#N/A	#N/A	#N/A	#N/A	VTI1B	#N/A	#N/A	#N/A	#N/A	#N/A	#N/A		PLIN1		USP6NL		MCCC2	CYSLTR1			DDX23
sp|Q6VEQ5|WASH2_HUMAN	WASH2P	WASH2_HUMAN WAS protein family homolog 2	2	350.567	333.717	342.142	291.278	257.942	274.61	0.80262	-0.317211	329.75	314.654	322.202	0.94172	-0.0866298	317.243	310.25	313.746	0.917007	-0.124996	261.646	235.955	248.8	0.727185	-0.459606	#N/A	#N/A	#N/A	#N/A	#N/A	#N/A	WASH2P	#N/A	#N/A	#N/A	#N/A	#N/A	#N/A		PLOD1		UST		MCCD1	CYSLTR2			DDX27
sp|Q9Y2W2|WBP11_HUMAN	WBP11	WBP11_HUMAN WW domain-binding protein 11	13	1646.19	1431.21	1538.7	1087.47	1268.42	1177.95	0.765546	-0.38544	1272.15	1549.6	1410.88	0.916927	-0.125122	1561.17	1329.05	1445.11	0.939176	-0.0905327	1258.06	1274.02	1266.04	0.822798	-0.281389	#N/A	#N/A	#N/A	#N/A	#N/A	#N/A	#N/A	#N/A	#N/A	#N/A	#N/A	#N/A	#N/A		PLOD2		UXS1		MCEE	CYTH4			DDX31
sp|Q8IWB7|WDFY1_HUMAN	WDFY1	WDFY1_HUMAN WD repeat and FYVE domain-containing protein 1	2	187.995	204.82	196.407	191.53	201.225	196.377	0.999847	-0.000220379	235.869	189.248	212.558	1.08223	0.11401	197.952	227.568	212.76	1.08326	0.115377	200.206	191.543	195.875	0.997286	-0.00392043	#N/A	#N/A	#N/A	#N/A	#N/A	#N/A	WDFY1	#N/A	#N/A	#N/A	#N/A	#N/A	#N/A		PNLDC1		VPS41		MCU	DAGLA			DDX41
sp|O75083|WDR1_HUMAN	WDR1	WDR1_HUMAN WD repeat-containing protein 1	10	2128.1	2010.03	2069.07	2379.75	2413.06	2396.4	1.15821	0.211893	2286.45	2821.87	2554.16	1.23445	0.30387	2499.09	2311.62	2405.36	1.16253	0.217271	1993.61	2355.39	2174.5	1.05096	0.0717047	#N/A	#N/A	#N/A	#N/A	#N/A	#N/A	#N/A	#N/A	#N/A	#N/A	#N/A	#N/A	#N/A		PNPLA6		VPS45		MCUB	DAGLB			DDX46
sp|Q9BZH6|WDR11_HUMAN	WDR11	WDR11_HUMAN WD repeat-containing protein 11	2	261.876	288.952	275.414	232.868	189.176	211.022	0.766199	-0.384208	225.354	184.71	205.032	0.74445	-0.425753	205.708	254.23	229.969	0.834994	-0.260162	217.215	344.109	280.662	1.01905	0.0272318	#N/A	#N/A	#N/A	#N/A	#N/A	#N/A	#N/A	#N/A	#N/A	#N/A	#N/A	#N/A	#N/A		POFUT1		VPS51		MCUR1	DCHS1			DDX47
sp|Q5JSH3|WDR44_HUMAN	WDR44	WDR44_HUMAN WD repeat-containing protein 44	1	80.5329	68.826	74.6795	71.7555	58.4343	65.0949	0.871657	-0.198167	62.1383	62.6696	62.404	0.835624	-0.259074	55.9226	52.0403	53.9815	0.722842	-0.468248	52.6085	42.2761	47.4423	0.635279	-0.654537	#N/A	#N/A	#N/A	#N/A	#N/A	#N/A	#N/A	#N/A	#N/A	#N/A	#N/A	#N/A	#N/A		POGLUT1		VPS52		MDH2	DCST1			DDX5
sp|P61964|WDR5_HUMAN	WDR5	WDR5_HUMAN WD repeat-containing protein 5	1	132.781	137.244	135.012	100.595	116.994	108.794	0.805811	-0.311487	122.294	123.862	123.078	0.911604	-0.13352	125.418	121.692	123.555	0.915137	-0.12794	97.3589	134.601	115.98	0.859031	-0.219218	#N/A	#N/A	#N/A	#N/A	#N/A	#N/A	#N/A	#N/A	WDR5	#N/A	#N/A	#N/A	#N/A		POGLUT2		VPS53		ME2	DCUN1D3			DDX50
sp|Q9GZS3|WDR61_HUMAN	WDR61	WDR61_HUMAN WD repeat-containing protein 61	2	37.244	39.783	38.5135	30.343	22.7943	26.5686	0.689853	-0.535639	36.4906	36.3923	36.4415	0.946199	-0.0797839	31.8903	34.4913	33.1908	0.861797	-0.214581	28.9006	41.1175	35.0091	0.909007	-0.137636	#N/A	#N/A	#N/A	#N/A	#N/A	#N/A	#N/A	#N/A	#N/A	#N/A	#N/A	#N/A	#N/A		POGLUT3		VPS54		ME3	DDR2			DDX51
sp|Q9Y4E6|WDR7_HUMAN	WDR7	WDR7_HUMAN WD repeat-containing protein 7	6	1084.41	1159.07	1121.74	1412.44	1457.49	1434.97	1.27923	0.355277	1234.28	1025.02	1129.65	1.00705	0.0101375	923.539	1030.86	977.199	0.871146	-0.199013	965.817	1320.19	1143	1.01896	0.0270915	#N/A	#N/A	#N/A	#N/A	#N/A	#N/A	#N/A	#N/A	#N/A	#N/A	#N/A	#N/A	#N/A		POMGNT2		XYLT1		METAP1D	DLG2			DDX52
sp|Q9NW82|WDR70_HUMAN	WDR70	WDR70_HUMAN WD repeat-containing protein 70	5	859.351	852.005	855.678	482.78	574.994	528.887	0.618091	-0.694108	662.141	681.808	671.975	0.785312	-0.348662	750.135	671.333	710.734	0.830609	-0.267758	567.004	808.974	687.989	0.804028	-0.314683	#N/A	#N/A	#N/A	#N/A	#N/A	#N/A	#N/A	#N/A	#N/A	#N/A	#N/A	#N/A	#N/A		POMK		XYLT2		METTL17	DLGAP1			DDX53
sp|Q9BQA1|MEP50_HUMAN	WDR77	MEP50_HUMAN Methylosome protein 50	1	19.263	26.9237	23.0934	23.7615	19.2605	21.511	0.93148	-0.102403	16.2497	24.9444	20.5971	0.891904	-0.16504	22.6587	19.7781	21.2184	0.91881	-0.122162	21.4077	29.0716	25.2396	1.09294	0.128214	#N/A	#N/A	#N/A	#N/A	#N/A	#N/A	#N/A	#N/A	#N/A	#N/A	#N/A	#N/A	#N/A		POMT1		YIF1A		MFN2	DLGAP2			DDX54
sp|Q562E7|WDR81_HUMAN	WDR81	WDR81_HUMAN WD repeat-containing protein 81	9	451.759	467.495	459.627	494.64	479.294	486.967	1.05948	0.0833605	493.873	424.938	459.405	0.999518	-0.00069542	431.845	503.84	467.842	1.01787	0.0255594	378.084	484.777	431.43	0.938654	-0.0913354	#N/A	#N/A	#N/A	#N/A	#N/A	#N/A	WDR81	#N/A	#N/A	#N/A	#N/A	#N/A	#N/A		POMT2		YIPF1		MGME1	DLGAP3			DDX56
sp|Q6UXN9|WDR82_HUMAN	WDR82	WDR82_HUMAN WD repeat-containing protein 82	2	210.501	205.622	208.062	200.774	256.699	228.737	1.09937	0.136677	236.692	318.279	277.486	1.33367	0.415402	182.797	233.545	208.171	1.00053	0.000759071	215.551	94.2199	154.885	0.744421	-0.425808	#N/A	#N/A	#N/A	#N/A	#N/A	#N/A	#N/A	#N/A	WDR82	#N/A	#N/A	#N/A	#N/A		POR		YIPF2		MICOS10	DLL1			DEDD2
sp|A4D1P6|WDR91_HUMAN	WDR91	WDR91_HUMAN WD repeat-containing protein 91	9	1228.93	1291.83	1260.38	1254.93	1294.86	1274.89	1.01152	0.0165197	1259.22	1158.9	1209.06	0.959282	-0.0599729	1149.04	1324.9	1236.97	0.981426	-0.0270483	961.375	1335.32	1148.35	0.911112	-0.134299	#N/A	#N/A	#N/A	#N/A	#N/A	#N/A	WDR91	#N/A	#N/A	#N/A	#N/A	#N/A	#N/A		PORCN		YIPF3		MICOS13	DLL4			DEK
sp|O95159|ZFPL1_HUMAN	ZFPL1	ZFPL1_HUMAN Zinc finger protein-like 1	1	73.5212	76.2093	74.8653	116.302	81.4194	98.8607	1.32052	0.401101	90.8444	85.449	88.1467	1.1774	0.23561	89.1991	104.858	97.0285	1.29604	0.374113	110.965	104.496	107.731	1.43899	0.525059	#N/A	#N/A	ZFPL1	#N/A	#N/A	#N/A	#N/A	#N/A	#N/A	#N/A	#N/A	#N/A	#N/A		PPIB		YIPF4		MICU1	DNAJC5			DENND4A
sp|Q9HD42|CHM1A_HUMAN	CHMP1A	CHM1A_HUMAN Charged multivesicular body protein 1a	6	632.498	635.077	633.788	836.018	714.511	775.264	1.22322	0.290689	702.575	597.7	650.138	1.0258	0.0367457	489.959	536.595	513.277	0.809857	-0.304262	361.572	378.378	369.975	0.583752	-0.776571	#N/A	#N/A	#N/A	#N/A	#N/A	#N/A	CHMP1A	#N/A	#N/A	#N/A	#N/A	#N/A	CHMP1A		PRKCSH		YIPF5		MICU2	DOK7			DEPDC1
sp|Q7LBR1|CHM1B_HUMAN	CHMP1B	CHM1B_HUMAN Charged multivesicular body protein 1b	8	1312.67	1185	1248.84	1791	1743.28	1767.14	1.41503	0.500833	1616.26	1449.82	1533.04	1.22758	0.295812	1402.06	1411.05	1406.55	1.12629	0.171583	1275.71	1158.54	1217.12	0.974608	-0.0371055	#N/A	#N/A	#N/A	#N/A	#N/A	#N/A	CHMP1B	#N/A	#N/A	#N/A	#N/A	#N/A	CHMP1B		PRSS50		YIPF6		MICU3	DPEP1			DERPC
sp|O43633|CHM2A_HUMAN	CHMP2A	CHM2A_HUMAN Charged multivesicular body protein 2a	11	2301.28	2010.02	2155.65	2518.92	2589.96	2554.44	1.185	0.244884	2685.84	2372.23	2529.03	1.17321	0.230464	2150.06	2202.37	2176.22	1.00954	0.0136981	1891.84	1544.83	1718.34	0.797131	-0.327112	#N/A	#N/A	#N/A	#N/A	#N/A	#N/A	CHMP2A	#N/A	#N/A	#N/A	#N/A	#N/A	CHMP2A		PTDSS1		YIPF7		MIEF1	DPP10			DET1
sp|Q9UQN3|CHM2B_HUMAN	CHMP2B	CHM2B_HUMAN Charged multivesicular body protein 2b	9	1681.75	1516.77	1599.26	1779.15	1692.7	1735.93	1.08546	0.1183	1877.14	1677.66	1777.4	1.11139	0.152364	1433.72	1425.92	1429.82	0.894051	-0.161571	1100.8	1059.26	1080.03	0.675331	-0.566333	#N/A	#N/A	#N/A	#N/A	#N/A	#N/A	CHMP2B	#N/A	#N/A	#N/A	#N/A	#N/A	CHMP2B		PTDSS2		ZDHHC15		MIEF1	DPP6			DGCR6
sp|Q9Y3E7-3|CHMP3_HUMAN	CHMP3	CHMP3_HUMAN Isoform 3 of Charged multivesicular body protein 3	1	340.074	355.702	347.888	491.622	466.738	479.18	1.3774	0.461945	440.95	363.846	402.398	1.15669	0.21	256.964	321.99	289.477	0.832098	-0.265174	193.227	180.242	186.734	0.536766	-0.897634	#N/A	#N/A	#N/A	#N/A	#N/A	#N/A	#N/A	#N/A	#N/A	#N/A	#N/A	#N/A	CHMP3		PTGIS		ZDHHC21		MIEF2	DRD2			DGCR6L
sp|Q9BY43|CHM4A_HUMAN	CHMP4A	CHM4A_HUMAN Charged multivesicular body protein 4a	3	270.613	275.844	273.228	244.912	275.376	260.144	0.952112	-0.0707975	295.62	268.502	282.061	1.03233	0.0458992	238.203	268.567	253.385	0.927374	-0.108777	240.794	214.093	227.444	0.83243	-0.2646	#N/A	#N/A	#N/A	#N/A	#N/A	#N/A	CHMP4A	#N/A	#N/A	#N/A	#N/A	#N/A	CHMP4A		PTGS1		ZDHHC3		MIGA1	DRD4			DGCR8
sp|Q9H444|CHM4B_HUMAN	CHMP4B	CHM4B_HUMAN Charged multivesicular body protein 4b	17	5126.11	5145.77	5135.94	6121.44	5661.36	5891.4	1.14709	0.197982	6473.14	5296.84	5884.99	1.14584	0.196412	4249.36	4669.79	4459.57	0.868307	-0.203722	3132.11	2924.32	3028.22	0.589613	-0.762161	#N/A	#N/A	#N/A	#N/A	#N/A	#N/A	#N/A	#N/A	#N/A	#N/A	#N/A	#N/A	CHMP4B		PTGS2		ZDHHC7		MIGA2	DRD5			DHX15
sp|Q9NZZ3|CHMP5_HUMAN	CHMP5	CHMP5_HUMAN Charged multivesicular body protein 5	7	850.718	810.93	830.824	1146.34	1136.75	1141.55	1.37399	0.458373	996.724	856.656	926.69	1.11539	0.157544	782.577	821.168	801.872	0.965153	-0.05117	726.805	697.143	711.974	0.856949	-0.222718	#N/A	#N/A	#N/A	#N/A	#N/A	#N/A	#N/A	#N/A	#N/A	#N/A	#N/A	#N/A	CHMP5		PTPN2		ZFPL1		MIPEP	DRP2			DHX16
sp|Q96FZ7|CHMP6_HUMAN	CHMP6	CHMP6_HUMAN Charged multivesicular body protein 6	3	444.122	373.979	409.05	640.63	647.263	643.947	1.57425	0.654662	548.552	530.731	539.641	1.31925	0.399722	443.366	499.956	471.661	1.15306	0.205471	456.852	273.034	364.943	0.892171	-0.164608	#N/A	#N/A	#N/A	#N/A	#N/A	#N/A	CHMP6	#N/A	#N/A	#N/A	#N/A	#N/A	CHMP6		PTPN5				MMAA	DSC1			DHX38
sp|Q8WUX9|CHMP7_HUMAN	CHMP7	CHMP7_HUMAN Charged multivesicular body protein 7	2	37.2484	41.954	39.6012	46.8203	43.7419	45.2811	1.14343	0.193365	43.2072	44.665	43.9361	1.10946	0.149863	52.6447	33.9586	43.3016	1.09344	0.128878	33.2436	30.5164	31.88	0.805026	-0.312893	#N/A	#N/A	#N/A	#N/A	#N/A	#N/A	#N/A	#N/A	#N/A	#N/A	#N/A	#N/A	CHMP7		RCE1				MMAB	DSC2			DHX8
sp|O14964|HGS_HUMAN	HGS	HGS_HUMAN Hepatocyte growth factor-regulated tyrosine kinase substrate	11	3162.63	3451.28	3306.95	1906.88	1797.82	1852.35	0.560138	-0.836147	2271.03	2217.44	2244.24	0.678641	-0.55928	2645.09	2637.28	2641.19	0.798676	-0.324318	2123.4	2696.81	2410.11	0.728799	-0.456407	#N/A	#N/A	#N/A	#N/A	#N/A	#N/A	HGS	#N/A	#N/A	#N/A	#N/A	#N/A	HGS		RCN1				MMUT	DSC3			DIEXF
sp|P53990-5|IST1_HUMAN	IST1	IST1_HUMAN Isoform 5 of IST1 homolog	13	3010.42	2924.65	2967.53	4479.61	4179.56	4329.59	1.45898	0.544964	3822.06	3485.31	3653.68	1.23122	0.300087	3320.33	3568.47	3444.4	1.16069	0.214988	2714.91	2731.06	2722.98	0.917592	-0.124076	#N/A	#N/A	#N/A	#N/A	#N/A	#N/A	#N/A	#N/A	#N/A	#N/A	#N/A	#N/A	IST1		RCN2				MPC1	DSCAML1			DIMT1
sp|Q96EY5|MB12A_HUMAN	MVB12A	MB12A_HUMAN Multivesicular body subunit 12A	4	591.108	582.486	586.797	547.64	558.757	553.198	0.942743	-0.0850643	614.988	570.732	592.86	1.01033	0.01483	637.33	627.435	632.382	1.07769	0.107936	565.161	628.556	596.859	1.01715	0.0245275	#N/A	#N/A	#N/A	#N/A	#N/A	#N/A	#N/A	#N/A	#N/A	#N/A	#N/A	#N/A	MVB12A		RCN3				MPC2	DSG1			DIP2A
sp|Q8WUM4|PDC6I_HUMAN	PDCD6IP	PDC6I_HUMAN Programmed cell death 6-interacting protein	59	11724.3	11491.6	11608	17153.7	16857.9	17005.8	1.46501	0.550914	17781.2	16124.9	16953	1.46047	0.546432	13214.8	15009.4	14112.1	1.21573	0.281819	11543.6	11533.4	11538.5	0.994017	-0.00865752	#N/A	#N/A	#N/A	#N/A	#N/A	#N/A	#N/A	#N/A	#N/A	#N/A	#N/A	#N/A	PDCD6IP		RDH10				MPV17	DSG2			DLX1
sp|Q96H20|SNF8_HUMAN	SNF8	SNF8_HUMAN Vacuolar-sorting protein SNF8	1	47.1732	47.9119	47.5426	48.5327	49.5334	49.0331	1.03135	0.0445352	59.8144	55.5843	57.6993	1.21364	0.279336	46.3368	51.0063	48.6715	1.02375	0.0338594	37.7849	59.8027	48.7938	1.02632	0.0374786	#N/A	#N/A	#N/A	#N/A	#N/A	#N/A	#N/A	#N/A	#N/A	#N/A	#N/A	#N/A	SNF8		RDH11				MPV17L2	DSG3			DLX2
sp|Q92783|STAM1_HUMAN	STAM	STAM1_HUMAN Signal transducing adapter molecule 1	2	614.429	761.517	687.973	372.943	341.946	357.445	0.519562	-0.944633	514.266	422.182	468.224	0.680585	-0.555153	482.794	554.197	518.495	0.753657	-0.40802	428.282	537.27	482.776	0.701737	-0.510998	#N/A	#N/A	#N/A	#N/A	#N/A	#N/A	STAM	#N/A	#N/A	#N/A	#N/A	#N/A	STAM		RDH12				MRM1	DSG4			DLX3
sp|Q99816|TS101_HUMAN	TSG101	TS101_HUMAN Tumor susceptibility gene 101 protein	17	3952.5	3766.72	3859.61	4888.71	4861	4874.85	1.26304	0.336904	4862.14	4464.73	4663.43	1.20827	0.272938	4309.78	4676.21	4492.99	1.16411	0.219222	3415.34	3351.64	3383.49	0.87664	-0.189943	#N/A	#N/A	#N/A	#N/A	#N/A	#N/A	#N/A	#N/A	#N/A	#N/A	#N/A	#N/A	TSG101		RDH16				MRM2	DUOX1			DLX4
sp|Q9NZ09-4|UBAP1_HUMAN	UBAP1	UBAP1_HUMAN Isoform 4 of Ubiquitin-associated protein 1	2	376.71	339.327	358.019	245.292	283.037	264.164	0.737852	-0.438598	309.572	284.757	297.164	0.830026	-0.268772	319.673	278.34	299.006	0.835171	-0.259857	236.378	284.703	260.54	0.727729	-0.458526	#N/A	#N/A	#N/A	#N/A	#N/A	#N/A	#N/A	#N/A	#N/A	#N/A	#N/A	#N/A	UBAP1		RDH5				MRM3	DUOX2			DLX5
sp|Q9BRG1|VPS25_HUMAN	VPS25	VPS25_HUMAN Vacuolar protein-sorting-associated protein 25	1	339.46	326.549	333.005	313.152	331.33	322.241	0.967678	-0.0474016	364.447	322.495	343.471	1.03143	0.0446466	303.49	287.587	295.538	0.887491	-0.172196	327.098	254.812	290.955	0.873727	-0.194746	#N/A	#N/A	#N/A	#N/A	#N/A	#N/A	#N/A	#N/A	#N/A	#N/A	#N/A	#N/A	VPS25		REEP3				MRPL1	DYTN			DLX6
sp|Q9UK41|VPS28_HUMAN	VPS28	VPS28_HUMAN Vacuolar protein sorting-associated protein 28 homolog	1	65.8839	68.8127	67.3483	101.864	103.783	102.823	1.52674	0.610457	98.0036	89.6561	93.8298	1.3932	0.478405	86.5208	94.4208	90.4708	1.34333	0.425811	61.4033	56.4261	58.9147	0.874776	-0.193014	#N/A	#N/A	#N/A	#N/A	#N/A	#N/A	#N/A	#N/A	#N/A	#N/A	#N/A	#N/A	VPS28		REEP4				MRPL10	ECE1			DMBX1
sp|Q8NEZ2|VP37A_HUMAN	VPS37A	VP37A_HUMAN Vacuolar protein sorting-associated protein 37A	2	80.365	65.2604	72.8127	68.4284	74.3873	71.4078	0.980706	-0.0281074	77.5226	73.5989	75.5607	1.03774	0.0534469	76.8083	72.1866	74.4975	1.02314	0.0330009	55.4892	67.0705	61.2798	0.841609	-0.248777	#N/A	#N/A	#N/A	#N/A	#N/A	#N/A	#N/A	#N/A	#N/A	#N/A	#N/A	#N/A	VPS37A		REEP5				MRPL11	EDNRA			DMC1
sp|Q9UN37|VPS4A_HUMAN	VPS4A	VPS4A_HUMAN Vacuolar protein sorting-associated protein 4A	4	479.362	412.058	445.71	545.941	533.53	539.736	1.21096	0.276147	589.524	524.688	557.106	1.24993	0.321847	505.172	516.924	511.048	1.14659	0.197353	433.944	432.036	432.99	0.971461	-0.0417716	#N/A	#N/A	#N/A	#N/A	#N/A	#N/A	VPS4A	#N/A	#N/A	#N/A	#N/A	#N/A	VPS4A		REEP6				MRPL12	EDNRB			DMRT1
sp|O75351|VPS4B_HUMAN	VPS4B	VPS4B_HUMAN Vacuolar protein sorting-associated protein 4B	5	1376.49	1377.44	1376.97	1673.09	1676.96	1675.03	1.21646	0.282691	1687.77	1606.92	1647.35	1.19636	0.258651	1556.54	1659.28	1607.91	1.16772	0.223695	1373.1	1410.28	1391.69	1.01069	0.015346	#N/A	#N/A	#N/A	#N/A	#N/A	#N/A	VPS4B	#N/A	#N/A	#N/A	#N/A	#N/A	VPS4B		RETSAT				MRPL13	EFNA2			DMRT2
sp|Q9NP79|VTA1_HUMAN	VTA1	VTA1_HUMAN Vacuolar protein sorting-associated protein VTA1 homolog	2	357.967	382.273	370.12	500.755	476.965	488.86	1.32081	0.401428	437.04	426.978	432.009	1.16721	0.223068	398.86	381.701	390.281	1.05447	0.0765183	344.796	351.454	348.125	0.940573	-0.0883877	#N/A	#N/A	#N/A	#N/A	#N/A	#N/A	VTA1	#N/A	#N/A	#N/A	#N/A	#N/A	VTA1		RNF103				MRPL14	EFNA3			DMRT3
sp|Q96B36-3|AKTS1_HUMAN	AKT1S1	AKTS1_HUMAN Isoform 3 of Proline-rich AKT1 substrate 1	5	1369.06	1361.81	1365.43	721.342	647.209	684.275	0.501141	-0.996711	858.007	791.394	824.7	0.603984	-0.727418	989.599	947.747	968.673	0.709424	-0.495279	844.617	1084.54	964.578	0.706426	-0.50139	#N/A	#N/A	#N/A	#N/A	#N/A	#N/A	#N/A	#N/A	#N/A	AKT1S1	#N/A	AKT1S1	#N/A		RNF133				MRPL15	EFNA5			DMRTA1
sp|Q9BVC4|LST8_HUMAN	MLST8	LST8_HUMAN Target of rapamycin complex subunit LST8	10	885.56	938.234	911.897	411.153	388.456	399.805	0.438432	-1.18958	581.239	548.436	564.838	0.619409	-0.691035	636.018	641.947	638.983	0.700718	-0.513094	612.067	831.785	721.926	0.791675	-0.33702	#N/A	#N/A	#N/A	#N/A	#N/A	#N/A	#N/A	#N/A	#N/A	MLST8	#N/A	MLST8	#N/A		RNF139				MRPL16	EFNB2			DMRTA2
sp|P42345|MTOR_HUMAN	MTOR	MTOR_HUMAN Serine/threonine-protein kinase mTOR	73	19469.4	21081.7	20275.6	9374.21	8478.78	8926.49	0.440259	-1.18358	11906.3	10862.4	11384.3	0.561482	-0.832689	13681.7	13911.8	13796.8	0.680462	-0.555413	12875.4	16560.5	14718	0.725896	-0.462164	#N/A	#N/A	#N/A	#N/A	#N/A	#N/A	#N/A	#N/A	#N/A	#N/A	#N/A	MTOR	#N/A		RNF145				MRPL17	EMB			DMRTB1
sp|P54619-3|AAKG1_HUMAN	PRKAG1	AAKG1_HUMAN Isoform 3 of 5'-AMP-activated protein kinase subunit gamma-1	3	272.474	250.003	261.238	251.501	244.694	248.097	0.949697	-0.0744603	263.172	252.426	257.799	0.986834	-0.0191209	257.813	248.383	253.098	0.968839	-0.0456714	227.71	242.995	235.353	0.90091	-0.150544	#N/A	#N/A	#N/A	#N/A	#N/A	#N/A	#N/A	#N/A	#N/A	#N/A	#N/A	PRKAG1	#N/A		RNF170				MRPL18	ENG			DMRTC2
sp|Q15382|RHEB_HUMAN	RHEB	RHEB_HUMAN GTP-binding protein Rheb	2	242.259	270.388	256.323	310.583	322.541	316.562	1.23501	0.304522	310.602	330.398	320.5	1.25037	0.322359	302.084	302.588	302.336	1.17951	0.238187	251.433	241.603	246.518	0.961746	-0.0562728	#N/A	#N/A	#N/A	#N/A	#N/A	#N/A	#N/A	#N/A	#N/A	#N/A	#N/A	RHEB	#N/A		RNF186				MRPL19	ENPEP			DMTF1
sp|P55735|SEC13_HUMAN	SEC13	SEC13_HUMAN Protein SEC13 homolog	3	983.279	959.296	971.288	901.61	886.567	894.089	0.920519	-0.119481	898.088	928.809	913.448	0.940451	-0.088575	930.078	866.699	898.389	0.924946	-0.112559	752.161	916.408	834.284	0.858947	-0.219359	#N/A	#N/A	#N/A	#N/A	#N/A	#N/A	#N/A	#N/A	#N/A	#N/A	#N/A	SEC13	#N/A		RNF19B				MRPL2	ENPP4			DMWD
sp|Q96EE3-1|SEH1_HUMAN	SEH1L	SEH1_HUMAN Isoform B of Nucleoporin SEH1	1	24.6841	26.6718	25.678	19.597	23.4924	21.5447	0.839035	-0.253197	32.1122	31.0732	31.5927	1.23034	0.299061	24.5382	25.9274	25.2328	0.982664	-0.0252297	26.1763	28.8852	27.5308	1.07216	0.100514	#N/A	#N/A	#N/A	#N/A	#N/A	#N/A	#N/A	#N/A	#N/A	#N/A	#N/A	SEH1L	#N/A		RNF26				MRPL20	ENPP6			DNAJC27
sp|P08195|4F2_HUMAN	SLC3A2	4F2_HUMAN 4F2 cell-surface antigen heavy chain	65	14710	14089.2	14399.6	14541	15445	14993	1.04121	0.0582603	15326.5	15345.1	15335.8	1.06502	0.0908747	16586.7	16623.8	16605.2	1.15317	0.205611	17457	17585.6	17521.3	1.21679	0.283081	#N/A	#N/A	#N/A	#N/A	#N/A	#N/A	#N/A	#N/A	#N/A	#N/A	#N/A	SLC3A2	#N/A		RNFT1				MRPL21	ENTPD8			DNAJC8
sp|Q01650|LAT1_HUMAN	SLC7A5	LAT1_HUMAN Large neutral amino acids transporter small subunit 1	7	3531.46	3347.55	3439.51	3447.71	3397.95	3422.83	0.995152	-0.00701131	3757.25	3485.61	3621.43	1.05289	0.0743585	3729.91	3740.02	3734.97	1.0859	0.118894	4099.18	3734.72	3916.95	1.13881	0.18753	#N/A	#N/A	#N/A	#N/A	#N/A	#N/A	#N/A	#N/A	#N/A	#N/A	#N/A	SLC7A5	#N/A		RPN1				MRPL22	EPCAM			DNMT1
sp|Q7Z3C6|ATG9A_HUMAN	ATG9A	ATG9A_HUMAN Autophagy-related protein 9A	15	2252.98	2382.62	2317.8	2886.6	2587.35	2736.97	1.18085	0.239826	2478.1	2241.12	2359.61	1.01804	0.0257923	2152.89	2264.26	2208.57	0.952876	-0.0696403	1723.9	2616.35	2170.12	0.936287	-0.0949779	#N/A	#N/A	#N/A	#N/A	#N/A	#N/A	#N/A	#N/A	#N/A	#N/A	ATG9A	#N/A	#N/A		RPN2				MRPL23	EPHA1			DNMT3B
sp|Q6DD88|ATLA3_HUMAN	ATL3	ATLA3_HUMAN Atlastin-3	33	6586.64	6971.72	6779.18	8530.98	8205.47	8368.22	1.2344	0.303811	7565.73	7089.98	7327.85	1.08094	0.11228	7582.37	7360.87	7471.62	1.10214	0.14031	7593.48	7731.12	7662.3	1.13027	0.176667	ATL3	#N/A	#N/A	#N/A	#N/A	#N/A	#N/A	#N/A	#N/A	#N/A	ATL3	#N/A	#N/A		RRBP1				MRPL24	EPHA5			DNMT3L
sp|Q14457|BECN1_HUMAN	BECN1	BECN1_HUMAN Beclin-1	2	755.324	737.103	746.213	590.079	552.526	571.303	0.765602	-0.385334	548.248	508.277	528.263	0.707924	-0.498333	579.945	594.879	587.412	0.78719	-0.345216	565.703	747.557	656.63	0.879949	-0.184508	#N/A	#N/A	#N/A	#N/A	#N/A	#N/A	#N/A	#N/A	#N/A	#N/A	BECN1	#N/A	#N/A		RTN1				MRPL27	EPHA7			DNTT
sp|Q9P1Z2|CACO1_HUMAN	CALCOCO1	CACO1_HUMAN Calcium-binding and coiled-coil domain-containing protein 1	1	63.0375	66.5674	64.8025	76.4629	64.7157	70.5893	1.0893	0.123401	88.346	91.1179	89.732	1.3847	0.469573	73.8071	83.9714	78.8893	1.21738	0.28378	54.1615	67.4041	60.7828	0.937971	-0.0923852	#N/A	#N/A	#N/A	#N/A	#N/A	#N/A	#N/A	#N/A	#N/A	#N/A	CALCOCO1	#N/A	#N/A		RTN2				MRPL28	EPHB2			DNTTIP1
tr|D6RJE7|D6RJE7_HUMAN	CALCOCO2	D6RJE7_HUMAN Calcium-binding and coiled-coil domain-containing protein 2 (Fragment)	1	154.597	114.246	134.422	125.882	135.988	130.935	0.974063	-0.0379131	130.892	126.585	128.738	0.957723	-0.0623203	130.132	119.577	124.855	0.928828	-0.106516	111.626	101.579	106.602	0.793046	-0.334523	#N/A	#N/A	#N/A	#N/A	#N/A	#N/A	#N/A	#N/A	#N/A	#N/A	CALCOCO2	#N/A	#N/A		RTN3				MRPL3	EPHB3			DNTTIP2
sp|Q13137-4|CACO2_HUMAN	CALCOCO2	CACO2_HUMAN Isoform 4 of Calcium-binding and coiled-coil domain-containing protein 2	11	901.435	832.588	867.011	2213.23	2232.71	2222.97	2.56395	1.35837	3156.85	3174.19	3165.52	3.65107	1.86832	2198.94	2463.43	2331.18	2.68876	1.42694	1347.36	1744.24	1545.8	1.78291	0.834231	#N/A	#N/A	#N/A	#N/A	#N/A	#N/A	#N/A	#N/A	#N/A	#N/A	CALCOCO2	#N/A	#N/A		RTN4				MRPL30	EPHB4			DONSON
sp|Q9ULG6-5|CCPG1_HUMAN	CCPG1	CCPG1_HUMAN Isoform 5 of Cell cycle progression protein 1	16	2421.1	2537.65	2479.38	3361.22	3220.29	3290.76	1.32725	0.408442	3512.75	3293.77	3403.26	1.37263	0.456941	3528.19	3571.74	3549.97	1.4318	0.517828	3104.87	4006.72	3555.8	1.43415	0.520196	#N/A	#N/A	#N/A	#N/A	#N/A	#N/A	#N/A	#N/A	#N/A	#N/A	CCPG1	#N/A	#N/A		RYR3				MRPL32	ERVFC1			DOT1L
sp|Q8NC44|F134A_HUMAN	FAM134A	F134A_HUMAN Protein FAM134A	4	75.1313	79.1287	77.13	95.2341	107.496	101.365	1.31421	0.394196	85.976	94.5263	90.2511	1.17012	0.226653	97.3446	81.8736	89.6091	1.16179	0.216353	68.4436	97.7658	83.1047	1.07746	0.107638	#N/A	#N/A	#N/A	#N/A	#N/A	#N/A	#N/A	#N/A	#N/A	#N/A	FAM134A	#N/A	#N/A		SACM1L				MRPL33	ERVFRD-1			DPF3
sp|Q14318-2|FKBP8_HUMAN	FKBP8	FKBP8_HUMAN Isoform 2 of Peptidyl-prolyl cis-trans isomerase FKBP8	5	396.413	446.096	421.255	473.757	466.196	469.976	1.11566	0.157897	448.574	441.957	445.265	1.057	0.0799737	450.93	481.148	466.039	1.10631	0.145759	480.961	483.939	482.45	1.14527	0.195687	#N/A	#N/A	#N/A	#N/A	#N/A	#N/A	#N/A	#N/A	#N/A	#N/A	FKBP8	#N/A	#N/A		SAMD8				MRPL34	ERVK-18			DPPA2
sp|Q9BQS8|FYCO1_HUMAN	FYCO1	FYCO1_HUMAN FYVE and coiled-coil domain-containing protein 1	6	1162.33	1199.49	1180.91	1704.68	1839.45	1772.07	1.50059	0.585533	1418.58	1392.49	1405.53	1.19021	0.25122	1050.34	1138.15	1094.24	0.926612	-0.109963	963.97	1125.15	1044.56	0.884538	-0.177004	#N/A	#N/A	#N/A	#N/A	#N/A	#N/A	FYCO1	#N/A	#N/A	#N/A	FYCO1	#N/A	#N/A		SC5D				MRPL35	ERVK-19			DPPA4
sp|Q9H0R8-2|GBRL1_HUMAN	GABARAPL1	GBRL1_HUMAN Isoform 2 of Gamma-aminobutyric acid receptor-associated protein-like 1	4	433.049	406.69	419.87	1348.72	1490.5	1419.61	3.38107	1.75748	1104.75	1061.8	1083.28	2.58003	1.36739	901.19	937.372	919.281	2.18944	1.13056	673.896	612.566	643.231	1.53198	0.615396	#N/A	#N/A	#N/A	#N/A	#N/A	#N/A	#N/A	#N/A	#N/A	#N/A	GABARAPL1	#N/A	#N/A		SCD				MRPL36	ERVK-21			DPRX
sp|P60520|GBRL2_HUMAN	GABARAPL2	GBRL2_HUMAN Gamma-aminobutyric acid receptor-associated protein-like 2	3	287.116	223.145	255.13	1015.01	1133.79	1074.4	4.21118	2.07422	891.538	789.111	840.324	3.2937	1.71971	627.955	815.492	721.724	2.82884	1.50021	514.149	370.88	442.514	1.73446	0.794489	#N/A	#N/A	#N/A	#N/A	#N/A	#N/A	#N/A	#N/A	#N/A	#N/A	GABARAPL2	#N/A	#N/A		SCD5				MRPL37	ERVK-24			DQX1
sp|P09382|LEG1_HUMAN	LGALS1	LEG1_HUMAN Galectin-1	20	1940.42	1872.42	1906.42	6785.95	6564.79	6675.37	3.50152	1.80798	6250.89	7231.22	6741.06	3.53598	1.82211	7985.42	8334.2	8159.81	4.28017	2.09767	9033.64	11581.5	10307.6	5.40677	2.43477	#N/A	#N/A	#N/A	#N/A	#N/A	#N/A	#N/A	#N/A	#N/A	#N/A	LGALS1	#N/A	#N/A		SDF2L1				MRPL38	ERVK-25			DR1
sp|P17931|LEG3_HUMAN	LGALS3	LEG3_HUMAN Galectin-3	15	1509.97	1537.28	1523.62	4636.71	4511.97	4574.34	3.00227	1.58606	4427.1	5151.66	4789.38	3.14341	1.65233	6399.71	6696.75	6548.23	4.2978	2.1036	8976.2	6715.08	7845.64	5.14932	2.36438	#N/A	#N/A	#N/A	#N/A	#N/A	#N/A	#N/A	#N/A	#N/A	#N/A	LGALS3	#N/A	#N/A		SDR16C5				MRPL39	ERVK-6			DRAP1
sp|O00214-2|LEG8_HUMAN	LGALS8	LEG8_HUMAN Isoform 2 of Galectin-8	9	532.555	557.987	545.271	1370.37	1372.79	1371.58	2.51541	1.33079	1846.18	1723.22	1784.7	3.27305	1.71064	1645.94	1935.47	1790.7	3.28406	1.71548	1235.54	1424.46	1330	2.43915	1.28638	#N/A	#N/A	#N/A	#N/A	#N/A	#N/A	#N/A	#N/A	#N/A	#N/A	LGALS8	#N/A	#N/A		SEC11A				MRPL4	ERVK-7			DRGX
sp|P20700|LMNB1_HUMAN	LMNB1	LMNB1_HUMAN Lamin-B1	30	4118.78	4924.43	4521.6	4883.42	5354.07	5118.74	1.13206	0.178955	5092.93	6147.45	5620.19	1.24296	0.313784	5435.12	5643.47	5539.3	1.22507	0.292867	5877.66	6569.01	6223.34	1.37636	0.460853	#N/A	#N/A	#N/A	#N/A	#N/A	#N/A	#N/A	#N/A	LMNB1	#N/A	LMNB1	#N/A	#N/A		SEC11C				MRPL40	ERVK-8			DROSHA
sp|A6NCE7|MP3B2_HUMAN	MAP1LC3B2	MP3B2_HUMAN Microtubule-associated proteins 1A/1B light chain 3 beta 2	8	1175.2	982.109	1078.65	3478.82	3740.59	3609.7	3.34649	1.74265	2941.01	2530.74	2735.88	2.53638	1.34277	2027.75	2464.27	2246.01	2.08223	1.05813	1632.3	1430.27	1531.28	1.41963	0.50551	#N/A	#N/A	#N/A	#N/A	#N/A	#N/A	#N/A	#N/A	#N/A	#N/A	MAP1LC3B2	#N/A	#N/A		SEC22A				MRPL41	ERVK-9			DSCC1
sp|Q14596|NBR1_HUMAN	NBR1	NBR1_HUMAN Next to BRCA1 gene 1 protein	1	45.7454	68.2858	57.0156	100.526	86.7869	93.6565	1.64265	0.716022	98.3597	81.7697	90.0647	1.57965	0.659605	79.9861	90.9658	85.4759	1.49917	0.584162	66.8054	64.0268	65.4161	1.14734	0.198289	#N/A	#N/A	#N/A	#N/A	#N/A	#N/A	#N/A	#N/A	#N/A	#N/A	NBR1	#N/A	#N/A		SEC22C				MRPL42	ERVK13-1			DSN1
sp|Q9BPW8|NIPS1_HUMAN	NIPSNAP1	NIPS1_HUMAN Protein NipSnap homolog 1	2	119.045	145.15	132.097	191.292	171.183	181.238	1.372	0.456278	150.853	176.188	163.52	1.23788	0.307868	170.61	165.034	167.822	1.27044	0.345329	200.15	194.85	197.5	1.49511	0.580249	#N/A	#N/A	#N/A	#N/A	#N/A	#N/A	#N/A	#N/A	#N/A	#N/A	NIPSNAP1	#N/A	#N/A		SEC23IP				MRPL43	ERVPABLB-1			DUSP1
sp|O75381|PEX14_HUMAN	PEX14	PEX14_HUMAN Peroxisomal membrane protein PEX14	4	1001.15	1003	1002.08	1353.9	1287.89	1320.89	1.31816	0.398525	1107.21	1152.63	1129.92	1.12758	0.17323	1291.07	1242.4	1266.74	1.26411	0.338124	1291.59	1356.69	1324.14	1.3214	0.402065	#N/A	#N/A	#N/A	#N/A	#N/A	#N/A	#N/A	PEX14	#N/A	#N/A	PEX14	#N/A	#N/A		SEC61A1				MRPL44	ERVS71-1			DUSP11
sp|Q99623|PHB2_HUMAN	PHB2	PHB2_HUMAN Prohibitin-2	44	10522.7	10656.2	10589.5	14239.6	14917.4	14578.5	1.3767	0.461215	12460.2	12993.3	12726.8	1.20183	0.265236	14219.1	13837.4	14028.2	1.32474	0.405707	15344.4	11144.9	13244.6	1.25074	0.322782	#N/A	#N/A	#N/A	#N/A	#N/A	#N/A	#N/A	#N/A	#N/A	#N/A	PHB2	#N/A	#N/A		SEC61A2				MRPL45	ERVW-1			DUSP2
sp|O95197|RTN3_HUMAN	RTN3	RTN3_HUMAN Reticulon-3	5	2340.02	2526.48	2433.25	3549.67	3176.56	3363.11	1.38215	0.466914	3107.59	2679.85	2893.72	1.18924	0.250041	2923.66	3032.37	2978.01	1.22388	0.291466	3075.02	2857.61	2966.32	1.21908	0.285787	RTN3	#N/A	#N/A	#N/A	#N/A	#N/A	#N/A	#N/A	#N/A	#N/A	RTN3	#N/A	#N/A		SEC61B				MRPL46	ESAM			DUSP3
sp|Q99442|SEC62_HUMAN	SEC62	SEC62_HUMAN Translocation protein SEC62	4	945.883	998.259	972.071	1241.79	1169.11	1205.45	1.24008	0.310438	1001.58	1041.27	1021.42	1.05077	0.0714497	1128.18	1054.11	1091.14	1.1225	0.166709	1109.25	1175.6	1142.42	1.17525	0.232966	SEC62	#N/A	#N/A	#N/A	#N/A	#N/A	#N/A	#N/A	#N/A	#N/A	SEC62	#N/A	#N/A		SEC61G				MRPL47	F11R			DUSP4
sp|O95721|SNP29_HUMAN	SNAP29	SNP29_HUMAN Synaptosomal-associated protein 29	14	2388.68	2370.18	2379.43	1731.24	1873.42	1802.33	0.757463	-0.400753	2319.48	2006.85	2163.16	0.909111	-0.137472	1984.72	1797.22	1890.97	0.794716	-0.33149	1673.97	1963.48	1818.72	0.764353	-0.387689	#N/A	#N/A	#N/A	#N/A	#N/A	#N/A	#N/A	#N/A	#N/A	#N/A	SNAP29	#N/A	#N/A		SEC62				MRPL48	F2R			DUSP5
sp|Q13501|SQSTM_HUMAN	SQSTM1	SQSTM_HUMAN Sequestosome-1	33	2681.46	2336.89	2509.18	3722.04	3982.79	3852.41	1.53533	0.61855	4535.43	3922.03	4228.73	1.68531	0.753011	3485.95	4310.87	3898.41	1.55366	0.635673	3103.02	3564.1	3333.56	1.32855	0.409851	#N/A	#N/A	#N/A	#N/A	#N/A	#N/A	#N/A	#N/A	#N/A	#N/A	SQSTM1	#N/A	#N/A		SEC63				MRPL49	F2RL1			DUX1
sp|P56962|STX17_HUMAN	STX17	STX17_HUMAN Syntaxin-17	13	4140.64	3947.42	4044.03	4088.6	4199.74	4144.17	1.02476	0.0352895	4358.04	4489.93	4423.99	1.09395	0.129553	4222	4096.52	4159.26	1.02849	0.0405332	3016.28	3931.43	3473.86	0.859008	-0.219256	#N/A	#N/A	#N/A	#N/A	#N/A	#N/A	#N/A	#N/A	#N/A	#N/A	STX17	#N/A	#N/A		SEL1L				MRPL50	F2RL2			DUX3
sp|Q86VP1-2|TAXB1_HUMAN	TAX1BP1	TAXB1_HUMAN Isoform 2 of Tax1-binding protein 1	6	701.387	695.055	698.221	823.647	852.776	838.212	1.2005	0.263631	968.061	804.653	886.357	1.26945	0.344204	908.718	1017.62	963.169	1.37946	0.464105	753.981	939.64	846.811	1.21281	0.278355	#N/A	#N/A	#N/A	#N/A	#N/A	#N/A	#N/A	#N/A	#N/A	#N/A	TAX1BP1	#N/A	#N/A		SELENOF				MRPL51	F2RL3			DUX4
sp|Q9Y6I9|TX264_HUMAN	TEX264	TX264_HUMAN Testis-expressed sequence 264 protein	2	47.6542	67.2246	57.4394	72.4202	57.9543	65.1873	1.13489	0.182549	54.0534	60.8065	57.43	0.999835	-0.000237373	72.5585	62.0499	67.3042	1.17174	0.228656	67.8442	71.1984	69.5213	1.21034	0.275414	TEX264	#N/A	#N/A	#N/A	#N/A	#N/A	#N/A	#N/A	#N/A	#N/A	TEX264	#N/A	#N/A		SELENON				MRPL52	FAIM2			DUX4L2
sp|Q9H0E2|TOLIP_HUMAN	TOLLIP	TOLIP_HUMAN Toll-interacting protein	5	1325.7	1287.38	1306.54	817.889	790.542	804.216	0.615531	-0.700097	997.175	1017.09	1007.13	0.770839	-0.375498	1099.54	1191.37	1145.45	0.876709	-0.189831	1104.25	996.444	1050.35	0.803915	-0.314885	#N/A	#N/A	#N/A	#N/A	#N/A	#N/A	#N/A	#N/A	#N/A	TOLLIP	TOLLIP	#N/A	#N/A		SELENOS				MRPL53	FAM171A1			DUX4L3
sp|Q9P2Y5|UVRAG_HUMAN	UVRAG	UVRAG_HUMAN UV radiation resistance-associated gene protein	1	18.4226	19.0182	18.7204	17.7674	13.237	15.5022	0.828091	-0.272138	20.0982	15.589	17.8436	0.953163	-0.0692045	16.8205	18.7084	17.7645	0.948935	-0.0756182	14.2293	24.8146	19.522	1.04282	0.0604859	#N/A	#N/A	#N/A	#N/A	#N/A	#N/A	#N/A	#N/A	#N/A	#N/A	UVRAG	#N/A	#N/A		SELENOT				MRPL54	FBXO45			DUX4L4
sp|Q9BV40|VAMP8_HUMAN	VAMP8	VAMP8_HUMAN Vesicle-associated membrane protein 8	6	1258.69	1146.38	1202.54	1346.05	1431.84	1388.94	1.15501	0.207911	1510.35	1301.37	1405.86	1.16908	0.225374	1289.38	1386.81	1338.1	1.11273	0.154102	1178.13	1183.25	1180.69	0.981834	-0.0264487	#N/A	#N/A	#N/A	#N/A	#N/A	#N/A	#N/A	#N/A	#N/A	#N/A	VAMP8	#N/A	#N/A		SERINC1				MRPL55	FCAMR			DUX4L5
sp|Q9P0L0|VAPA_HUMAN	VAPA	VAPA_HUMAN Vesicle-associated membrane protein-associated protein A	25	7079.66	6307.21	6693.43	12675.7	12541.6	12608.7	1.88373	0.913595	8740.73	8060.25	8400.49	1.25503	0.327727	8568.91	8753.03	8660.97	1.29395	0.371782	9115.15	7487.44	8301.3	1.24021	0.31059	#N/A	#N/A	#N/A	#N/A	#N/A	#N/A	#N/A	#N/A	#N/A	#N/A	VAPA	#N/A	#N/A		SERP1				MRPL57	FCER1A			DUX4L6
sp|O95292|VAPB_HUMAN	VAPB	VAPB_HUMAN Vesicle-associated membrane protein-associated protein B/C	9	2647.82	2409.44	2528.63	4801.45	4896.86	4849.15	1.9177	0.939377	3235.48	3008.65	3122.07	1.23469	0.304145	3245.56	3188.21	3216.89	1.27218	0.347308	3331.91	2827.13	3079.52	1.21786	0.28435	VAPB	#N/A	#N/A	#N/A	#N/A	#N/A	#N/A	#N/A	#N/A	#N/A	VAPB	#N/A	#N/A		SERP2				MRPL58	FCER1G			DUX4L7
sp|Q9HBF4|ZFYV1_HUMAN	ZFYVE1	ZFYV1_HUMAN Zinc finger FYVE domain-containing protein 1	2	71.5255	65.8338	68.6796	86.834	67.9088	77.3714	1.12655	0.171918	66.4135	73.0761	69.7448	1.01551	0.022203	80.6313	73.8669	77.2491	1.12477	0.169635	57.1647	83.6792	70.4219	1.02537	0.0361425	#N/A	#N/A	#N/A	#N/A	#N/A	#N/A	#N/A	#N/A	#N/A	#N/A	ZFYVE1	#N/A	#N/A		SERPINA2				MRPL9	FCGR1A			DUX4L9
sp|P02808|STAT_HUMAN	STATH	STAT_HUMAN Statherin	1	40.9934	9.25651	25.125	7.56157	9.8737	8.71763	0.346971	-1.52711	11.5082	16.1412	13.8247	0.550238	-0.861873	29.5869	11.0731	20.33	0.809156	-0.305511	11.0883	9.54692	10.3176	0.410652	-1.28401	#N/A	#N/A	#N/A	#N/A	#N/A	#N/A	#N/A	#N/A	#N/A	#N/A	#N/A	#N/A	#N/A		SERPINH1				MRPS10	FCGR1B			DUX5
sp|Q96L93-2|KI16B_HUMAN	KIF16B	KI16B_HUMAN Isoform 2 of Kinesin-like protein KIF16B	1	48.547	47.9626	48.2548	17.6358	18.8894	18.2626	0.378462	-1.40178	31.0245	34.9814	33.0029	0.683931	-0.548077	40.5865	39.1609	39.8737	0.826316	-0.275235	30.3603	46.9586	38.6594	0.801152	-0.319851	#N/A	#N/A	#N/A	#N/A	#N/A	#N/A	#N/A	#N/A	#N/A	#N/A	#N/A	#N/A	#N/A		SEZ6L				MRPS11	FCGR2A			DUXA
sp|P47755|CAZA2_HUMAN	CAPZA2	CAZA2_HUMAN F-actin-capping protein subunit alpha-2	6	2983.28	3775.27	3379.28	1511.29	1448.22	1479.76	0.437891	-1.19136	1956.63	1799.44	1878.04	0.555751	-0.84749	2180.31	1790.91	1985.61	0.587585	-0.767131	1664.47	3022.16	2343.32	0.693437	-0.528163	#N/A	#N/A	#N/A	#N/A	#N/A	#N/A	#N/A	#N/A	#N/A	#N/A	#N/A	#N/A	#N/A		SGPL1				MRPS12	FCGR2B			DUXB
sp|Q15003|CND2_HUMAN	NCAPH	CND2_HUMAN Condensin complex subunit 2	1	49.5089	56.7833	53.1461	29.8435	18.1887	24.0161	0.451888	-1.14596	32.3978	36.5181	34.4579	0.648363	-0.625127	39.8868	30.9874	35.4371	0.666786	-0.584703	31.8707	49.5094	40.69	0.765626	-0.385288	#N/A	#N/A	#N/A	#N/A	#N/A	#N/A	#N/A	#N/A	#N/A	#N/A	#N/A	#N/A	#N/A		SGPP2				MRPS14	FCRL1			DXO
sp|P01893|HLAH_HUMAN	HLA-H	HLAH_HUMAN Putative HLA class I histocompatibility antigen, alpha chain H	2	180.54	313.424	246.982	111.621	115.774	113.697	0.460347	-1.11921	127.59	105.925	116.757	0.472737	-1.08089	169.037	131.113	150.075	0.607635	-0.718722	237.373	536.7	387.037	1.56706	0.648064	#N/A	#N/A	#N/A	#N/A	#N/A	HLA-H	#N/A	#N/A	#N/A	#N/A	#N/A	#N/A	#N/A		SHISA2				MRPS15	FCRL2			DYRK1A
sp|P52948|NUP98_HUMAN	NUP98	NUP98_HUMAN Nuclear pore complex protein Nup98-Nup96	37	10270.1	10591.5	10430.8	5039.39	5246.69	5143.04	0.493063	-1.02016	5979.88	7133.8	6556.84	0.628604	-0.669777	7208.9	6309.63	6759.26	0.64801	-0.625912	6753.85	7955.92	7354.89	0.705112	-0.504075	#N/A	#N/A	#N/A	#N/A	#N/A	#N/A	#N/A	#N/A	NUP98	#N/A	#N/A	#N/A	#N/A		SHISA3				MRPS16	FCRL3			DYRK1B
sp|P25440-2|BRD2_HUMAN	BRD2	BRD2_HUMAN Isoform 2 of Bromodomain-containing protein 2	1	67.7007	68.7825	68.2416	34.3515	39.6212	36.9864	0.541991	-0.883659	42.5939	61.1564	51.8751	0.760169	-0.395608	46.6615	35.2624	40.962	0.600249	-0.736367	39.3991	66.3853	52.8922	0.775073	-0.367596	#N/A	#N/A	#N/A	#N/A	#N/A	#N/A	#N/A	#N/A	BRD2	#N/A	#N/A	#N/A	#N/A		SIL1				MRPS17	FCRL4			E2F1
sp|Q92785|REQU_HUMAN	DPF2	REQU_HUMAN Zinc finger protein ubi-d4	1	27.2524	19.018	23.1352	14.0338	11.1019	12.5678	0.543235	-0.880352	18.2441	23.7694	21.0068	0.907999	-0.139237	18.4951	9.56011	14.0276	0.606332	-0.721821	16.1894	11.8446	14.017	0.605873	-0.722912	#N/A	#N/A	#N/A	#N/A	#N/A	#N/A	#N/A	#N/A	#N/A	#N/A	#N/A	#N/A	#N/A		SLC18A1				MRPS18A	FCRL5			E2F2
sp|Q9UK23|NAGPA_HUMAN	NAGPA	NAGPA_HUMAN N-acetylglucosamine-1-phosphodiester alpha-N-acetylglucosaminidase	5	675.038	836.942	755.99	421.848	413.83	417.839	0.552704	-0.85542	519.825	504.915	512.37	0.677747	-0.561181	593.295	575.782	584.538	0.773209	-0.371069	557.902	912.35	735.126	0.972402	-0.0403756	#N/A	#N/A	NAGPA	#N/A	#N/A	#N/A	#N/A	#N/A	#N/A	#N/A	#N/A	#N/A	#N/A		SLC27A4				MRPS18B	FCRL6			E2F3
sp|P78406|RAE1L_HUMAN	RAE1	RAE1L_HUMAN mRNA export factor	17	5923.48	6324.64	6124.06	3298.97	3478.75	3388.86	0.553368	-0.853688	3887.28	4460.49	4173.89	0.681555	-0.553098	4379.91	3992.29	4186.1	0.68355	-0.548882	4323.67	4651.36	4487.51	0.732768	-0.448572	#N/A	#N/A	#N/A	#N/A	#N/A	#N/A	#N/A	#N/A	#N/A	#N/A	#N/A	#N/A	#N/A		SLC33A1				MRPS18C	FER1L5			E2F4
sp|P01834|IGKC_HUMAN	IGKC	IGKC_HUMAN Ig kappa chain C region	3	194.895	21.8193	108.357	37.7624	82.6523	60.2073	0.555638	-0.847783	61.0068	3454.03	1757.52	16.2197	4.01967	76.2207	73.194	74.7073	0.689455	-0.536472	170.357	37.4444	103.901	0.958873	-0.060589	#N/A	#N/A	#N/A	#N/A	#N/A	#N/A	#N/A	#N/A	#N/A	#N/A	#N/A	#N/A	#N/A		SLC35B1				MRPS2	FFAR1			E2F5
sp|Q9NRA0-5|SPHK2_HUMAN	SPHK2	SPHK2_HUMAN Isoform 5 of Sphingosine kinase 2	5	618.241	645.906	632.073	364.534	343.921	354.227	0.560421	-0.835416	426.642	422.504	424.573	0.671715	-0.57408	462.248	537.675	499.962	0.790986	-0.338275	489.645	496.071	492.858	0.779748	-0.35892	#N/A	#N/A	#N/A	#N/A	#N/A	#N/A	#N/A	#N/A	#N/A	#N/A	#N/A	#N/A	#N/A		SLC35D1				MRPS21	FFAR2			E2F6
sp|P0CG12|CTF8A_HUMAN	CHTF8	CTF8A_HUMAN Chromosome transmission fidelity protein 8 homolog isoform 2	8	857.896	801.316	829.606	473.715	458.46	466.087	0.561818	-0.831826	511.279	513.794	512.536	0.617807	-0.694772	665.201	590.089	627.645	0.756558	-0.402478	498.963	595.943	547.453	0.659895	-0.599691	#N/A	#N/A	#N/A	#N/A	#N/A	#N/A	#N/A	#N/A	CHTF8	#N/A	#N/A	#N/A	#N/A		SLC37A1				MRPS22	FFAR3			E2F7
sp|Q16186|ADRM1_HUMAN	ADRM1	ADRM1_HUMAN Proteasomal ubiquitin receptor ADRM1	2	506.956	597.147	552.052	323.429	313.587	318.508	0.576953	-0.793473	388.759	399.393	394.076	0.713839	-0.486329	405.798	321.249	363.524	0.658496	-0.602754	306.917	495.891	401.404	0.727113	-0.459748	#N/A	#N/A	#N/A	#N/A	#N/A	#N/A	#N/A	#N/A	#N/A	#N/A	#N/A	#N/A	#N/A		SLC37A2				MRPS23	FFAR4			E2F8
sp|P30408|T4S1_HUMAN	TM4SF1	T4S1_HUMAN Transmembrane 4 L6 family member 1	1	77.2435	113.002	95.1227	55.8397	54.1368	54.9883	0.578077	-0.790667	78.0256	68.8222	73.4239	0.771886	-0.373541	64.8352	80.7649	72.8	0.765327	-0.385851	69.2236	170.596	119.91	1.26058	0.334087	#N/A	#N/A	#N/A	#N/A	#N/A	#N/A	#N/A	#N/A	#N/A	#N/A	#N/A	#N/A	#N/A		SLC37A3				MRPS24	FLVCR2			EAF1
sp|Q9H3G5|CPVL_HUMAN	CPVL	CPVL_HUMAN Probable serine carboxypeptidase CPVL	12	2729.44	3112.59	2921.02	1652.82	1730.76	1691.79	0.579179	-0.787919	2056.8	1859.37	1958.09	0.670344	-0.577026	2195.11	2279.02	2237.07	0.765852	-0.384863	1920.19	3102.48	2511.34	0.859747	-0.218015	#N/A	#N/A	#N/A	#N/A	#N/A	#N/A	#N/A	#N/A	#N/A	#N/A	#N/A	#N/A	#N/A		SLC37A4				MRPS25	FPR1			EAF2
sp|Q9P0K7-2|RAI14_HUMAN	RAI14	RAI14_HUMAN Isoform 2 of Ankycorbin	1	55.2948	61.4817	58.3882	40.1229	27.9279	34.0254	0.582744	-0.779066	45.2178	27.905	36.5614	0.626177	-0.675357	34.5849	36.5091	35.547	0.608804	-0.71595	27.3416	37.2218	32.2817	0.55288	-0.854962	#N/A	#N/A	#N/A	#N/A	#N/A	#N/A	#N/A	#N/A	#N/A	#N/A	#N/A	#N/A	#N/A		SLN				MRPS26	FPR2			EBF1
sp|Q15038|DAZP2_HUMAN	DAZAP2	DAZP2_HUMAN DAZ-associated protein 2	1	122.726	118.639	120.683	68.2863	72.6095	70.4479	0.583746	-0.776588	72.6938	90.9344	81.8141	0.677928	-0.560795	93.27	82.6535	87.9617	0.728869	-0.456268	75.0963	115.441	95.2687	0.789416	-0.341143	#N/A	#N/A	#N/A	#N/A	#N/A	#N/A	#N/A	#N/A	#N/A	#N/A	#N/A	#N/A	#N/A		SMIM14				MRPS28	FPR3			EBF2
tr|H0Y6A7|H0Y6A7_HUMAN	GDAP1L1	H0Y6A7_HUMAN Ganglioside-induced differentiation-associated protein 1-like 1 (Fragment)	2	579.25	659.365	619.308	366.03	357.169	361.599	0.583877	-0.776263	415.619	358.134	386.877	0.624692	-0.678783	428.194	431.645	429.919	0.694194	-0.526589	350.472	512.39	431.431	0.696635	-0.521526	#N/A	#N/A	#N/A	#N/A	#N/A	#N/A	#N/A	#N/A	#N/A	#N/A	#N/A	#N/A	#N/A		SOAT1				MRPS30	FRAS1			EBF3
sp|P61626|LYSC_HUMAN	LYZ	LYSC_HUMAN Lysozyme C	1	87.7782	25.8189	56.7985	30.2039	36.4422	33.3231	0.586688	-0.769334	33.8543	64.9521	49.4032	0.869797	-0.20125	28.7743	42.6908	35.7326	0.62911	-0.668615	25.8906	38.7381	32.3144	0.568929	-0.813679	#N/A	#N/A	#N/A	#N/A	#N/A	#N/A	#N/A	#N/A	#N/A	#N/A	#N/A	#N/A	#N/A		SOAT2				MRPS31	FREM2			EBF4
sp|O94875-11|SRBS2_HUMAN	SORBS2	SRBS2_HUMAN Isoform 11 of Sorbin and SH3 domain-containing protein 2	10	1721.04	1687.77	1704.4	893.5	1114.72	1004.11	0.589126	-0.763351	915.097	1211.54	1063.32	0.623865	-0.680694	1347.48	1124.46	1235.97	0.725162	-0.463624	1338.23	1364.86	1351.55	0.792972	-0.334659	#N/A	#N/A	#N/A	#N/A	#N/A	#N/A	#N/A	#N/A	#N/A	#N/A	#N/A	#N/A	#N/A		SPCS1				MRPS33	FRRS1L			EBNA1BP2
sp|O43251-8|RFOX2_HUMAN	RBFOX2	RFOX2_HUMAN Isoform 8 of RNA binding protein fox-1 homolog 2	6	576.009	529.918	552.964	301.44	360.197	330.818	0.598265	-0.741144	354.786	379.554	367.17	0.664004	-0.590736	353.966	302.771	328.369	0.593834	-0.751869	317.836	435.395	376.615	0.681086	-0.554092	#N/A	#N/A	#N/A	#N/A	#N/A	#N/A	#N/A	#N/A	#N/A	#N/A	#N/A	#N/A	#N/A		SPCS2				MRPS34	FSHR			EDRF1
sp|P53355-3|DAPK1_HUMAN	DAPK1	DAPK1_HUMAN Isoform 3 of Death-associated protein kinase 1	1	571.591	737.356	654.474	429.834	354.931	392.382	0.599539	-0.738074	488.903	396.352	442.627	0.676311	-0.564242	388.515	494.688	441.601	0.674743	-0.56759	451.633	792.194	621.913	0.95025	-0.0736208	#N/A	#N/A	#N/A	#N/A	#N/A	#N/A	#N/A	#N/A	#N/A	#N/A	#N/A	#N/A	#N/A		SPCS3				MRPS35	FXYD1			EED
sp|Q8NE00|TM104_HUMAN	TMEM104	TM104_HUMAN Transmembrane protein 104	4	352.609	520.829	436.719	277.719	246.611	262.165	0.600306	-0.73623	314.475	264.429	289.452	0.662788	-0.593381	264.609	343.128	303.868	0.695799	-0.523258	273.434	478.485	375.96	0.860873	-0.216128	#N/A	#N/A	#N/A	#N/A	#N/A	#N/A	#N/A	#N/A	#N/A	#N/A	#N/A	#N/A	#N/A		SPPL2C				MRPS36	FXYD3			EEF1A2
sp|O43934|MFS11_HUMAN	MFSD11	MFS11_HUMAN UNC93-like protein MFSD11	4	1732.4	2284.97	2008.68	1238.79	1190.61	1214.7	0.604724	-0.725651	1576.72	1151.6	1364.16	0.679131	-0.558238	1338.87	1594.89	1466.88	0.730269	-0.4535	1225.92	1998.86	1612.39	0.802709	-0.317051	#N/A	#N/A	#N/A	#N/A	#N/A	#N/A	#N/A	#N/A	#N/A	#N/A	#N/A	#N/A	#N/A		SPTLC1				MRPS5	FZD1			EEF1D
sp|Q14687|GSE1_HUMAN	GSE1	GSE1_HUMAN Genetic suppressor element 1	1	246.972	241.49	244.231	145.633	150.641	148.137	0.606545	-0.721314	189.85	166.988	178.419	0.730534	-0.452977	210.944	172.581	191.762	0.785169	-0.348926	178.899	198.377	188.638	0.772375	-0.372626	#N/A	#N/A	#N/A	#N/A	#N/A	#N/A	#N/A	#N/A	#N/A	#N/A	#N/A	#N/A	#N/A		SPTLC2				MRPS6	FZD10			EFCAB6
sp|P01008|ANT3_HUMAN	SERPINC1	ANT3_HUMAN Antithrombin-III	10	4282.75	6511.74	5397.24	3283.79	3291.97	3287.88	0.609177	-0.715066	3490.09	2767.14	3128.61	0.579669	-0.786699	4274.68	4140.11	4207.4	0.779545	-0.359296	4109.52	8013.85	6061.69	1.12311	0.167496	#N/A	#N/A	#N/A	#N/A	#N/A	#N/A	#N/A	#N/A	#N/A	#N/A	#N/A	#N/A	#N/A		SPTLC3				MRPS7	FZD2			EFTUD2
sp|Q92484|ASM3A_HUMAN	SMPDL3A	ASM3A_HUMAN Acid sphingomyelinase-like phosphodiesterase 3a	10	3055.63	3539.95	3297.79	2047.03	1991.82	2019.42	0.612357	-0.707555	2511.97	2127.34	2319.65	0.703397	-0.507589	2552.65	2711.92	2632.28	0.798197	-0.325184	2277.99	2947.28	2612.64	0.792238	-0.335994	#N/A	#N/A	#N/A	#N/A	#N/A	#N/A	#N/A	#N/A	#N/A	#N/A	#N/A	#N/A	#N/A		SPTSSA				MRPS9	FZD3			EGLN2
sp|P04003|C4BPA_HUMAN	C4BPA	C4BPA_HUMAN C4b-binding protein alpha chain	1	131.703	88.9279	110.315	68.3	66.8186	67.5593	0.612419	-0.707409	126.171	73.1402	99.6556	0.903369	-0.146612	98.323	119.873	109.098	0.988964	-0.0160102	69.2738	131.783	100.528	0.911281	-0.134032	#N/A	#N/A	#N/A	#N/A	#N/A	#N/A	#N/A	#N/A	#N/A	#N/A	#N/A	#N/A	#N/A		SPTSSB				MRRF	FZD4			EGR2
sp|Q9NPA8|ENY2_HUMAN	ENY2	ENY2_HUMAN Transcription and mRNA export factor ENY2	3	921.541	926.922	924.232	523.226	609.961	566.593	0.613043	-0.70594	715.342	745.883	730.612	0.790508	-0.339148	717.733	679.304	698.518	0.755783	-0.403956	675.777	842.95	759.364	0.821616	-0.283464	#N/A	#N/A	#N/A	#N/A	#N/A	#N/A	#N/A	#N/A	ENY2	#N/A	#N/A	#N/A	#N/A		SQLE				MRS2	FZD9			EGR3
sp|Q9NZN8|CNOT2_HUMAN	CNOT2	CNOT2_HUMAN CCR4-NOT transcription complex subunit 2	2	53.7569	48.9242	51.3406	38.709	24.2995	31.5042	0.613633	-0.704552	38.2223	30.8021	34.5122	0.672221	-0.572992	40.0446	39.6612	39.8529	0.776246	-0.365414	30.6426	39.1524	34.8975	0.679726	-0.556975	#N/A	#N/A	#N/A	#N/A	#N/A	#N/A	#N/A	#N/A	#N/A	#N/A	#N/A	#N/A	#N/A		SRD5A1				MSRB2	GABBR2			EGR4
sp|Q86UU0|BCL9L_HUMAN	BCL9L	BCL9L_HUMAN B-cell CLL/lymphoma 9-like protein	1	18.7877	21.9223	20.355	12.1984	12.9002	12.5493	0.616522	-0.697776	11.1136	10.8456	10.9796	0.539406	-0.890558	13.4221	12.3865	12.9043	0.633962	-0.657531	14.6315	16.1676	15.3996	0.756549	-0.402495	#N/A	#N/A	#N/A	#N/A	#N/A	#N/A	#N/A	#N/A	BCL9L	#N/A	#N/A	#N/A	#N/A		SRD5A2				MT-ATP6	GABRA3			EHF
sp|Q6ZNA5-2|FRRS1_HUMAN	FRRS1	FRRS1_HUMAN Isoform 2 of Ferric-chelate reductase 1	2	2121.8	2371.75	2246.78	1417.85	1354.91	1386.38	0.617053	-0.696533	1401.14	1239.7	1320.42	0.587696	-0.766859	1744.59	1791.31	1767.95	0.786883	-0.345778	1362.13	1538.74	1450.43	0.645563	-0.63137	#N/A	#N/A	#N/A	#N/A	#N/A	#N/A	#N/A	#N/A	#N/A	#N/A	#N/A	#N/A	#N/A		SRD5A3				MT-ATP8	GABRA4			EHMT1
sp|Q15287|RNPS1_HUMAN	RNPS1	RNPS1_HUMAN RNA-binding protein with serine-rich domain 1	3	660.742	661.021	660.881	382.753	436.45	409.601	0.619781	-0.690171	467.958	579.013	523.486	0.792102	-0.336242	514.135	424.97	469.553	0.710494	-0.493105	471.217	566.09	518.654	0.78479	-0.349621	#N/A	#N/A	#N/A	#N/A	#N/A	#N/A	#N/A	#N/A	#N/A	#N/A	#N/A	#N/A	#N/A		SRPRA				MT-CO1	GABRA5			EHMT2
sp|Q8WUF5|IASPP_HUMAN	PPP1R13L	IASPP_HUMAN RelA-associated inhibitor	48	11493.4	11456.7	11475	7418.04	6853.73	7135.89	0.621861	-0.685336	8602.82	9583.39	9093.1	0.792424	-0.335656	8943.84	6843.8	7893.82	0.687912	-0.539705	6187.85	7614.78	6901.32	0.601419	-0.733557	#N/A	#N/A	#N/A	#N/A	#N/A	#N/A	#N/A	#N/A	#N/A	#N/A	#N/A	#N/A	#N/A		SRPRB				MT-CO2	GABRA6			EID2
sp|P35637|FUS_HUMAN	FUS	FUS_HUMAN RNA-binding protein FUS	2	497.515	405.017	451.266	286.15	275.575	280.862	0.622388	-0.684114	297.685	466.84	382.262	0.847089	-0.239414	332.182	284.213	308.197	0.682962	-0.550123	341.521	391.824	366.673	0.812542	-0.299486	#N/A	#N/A	#N/A	#N/A	#N/A	#N/A	#N/A	#N/A	FUS	#N/A	#N/A	#N/A	#N/A		SSR1				MT-CO3	GABRB1			EID2B
sp|O15432|COPT2_HUMAN	SLC31A2	COPT2_HUMAN Probable low affinity copper uptake protein 2	1	55.7104	51.9595	53.8349	41.4659	25.5812	33.5236	0.62271	-0.683368	36.7926	29.8407	33.3166	0.618867	-0.6923	41.8336	22.3105	32.072	0.595748	-0.747227	38.5125	40.9453	39.7289	0.737976	-0.438354	#N/A	#N/A	#N/A	#N/A	#N/A	#N/A	#N/A	#N/A	#N/A	#N/A	#N/A	#N/A	#N/A		SSR2				MT-CYB	GABRD			EIF1AD
sp|Q6NUT3-3|MFS12_HUMAN	MFSD12	MFS12_HUMAN Isoform 3 of Major facilitator superfamily domain-containing protein 12	5	2090.52	2709.04	2399.78	1544.43	1449.78	1497.11	0.623851	-0.680727	1973.36	1379.85	1676.61	0.698649	-0.517359	1521.48	1969.02	1745.25	0.727254	-0.459468	1379.97	3010.9	2195.43	0.914848	-0.128395	#N/A	#N/A	#N/A	#N/A	#N/A	#N/A	#N/A	#N/A	#N/A	#N/A	#N/A	#N/A	#N/A		SSR3				MT-ND1	GABRE			ELF1
sp|Q14157-1|UBP2L_HUMAN	UBAP2L	UBP2L_HUMAN Isoform 2 of Ubiquitin-associated protein 2-like	62	22929.1	18432.1	20680.6	11920.4	13940.9	12930.6	0.625255	-0.677483	13887.6	15109.3	14498.5	0.701065	-0.512379	16273.9	13295.4	14784.6	0.714904	-0.484178	12931.7	15394.1	14162.9	0.68484	-0.546161	#N/A	#N/A	#N/A	#N/A	#N/A	#N/A	#N/A	#N/A	#N/A	#N/A	#N/A	#N/A	#N/A		SSR4				MT-ND2	GABRG1			ELF2
sp|Q9UKL0|RCOR1_HUMAN	RCOR1	RCOR1_HUMAN REST corepressor 1	1	500.059	501.543	500.801	294.425	332.775	313.6	0.626197	-0.675312	386.477	359.691	373.084	0.744975	-0.424737	411.711	361.917	386.814	0.772391	-0.372597	372.305	464.556	418.43	0.835522	-0.259249	#N/A	#N/A	#N/A	#N/A	#N/A	#N/A	#N/A	#N/A	#N/A	#N/A	#N/A	#N/A	#N/A		STIM2				MT-ND3	GABRG3			ELF4
sp|Q15637-5|SF01_HUMAN	SF1	SF01_HUMAN Isoform 5 of Splicing factor 1	7	1012.91	940.466	976.688	581.424	644.631	613.027	0.627659	-0.671946	620.804	774.19	697.497	0.714145	-0.485711	761.295	678.916	720.106	0.737293	-0.439689	679.711	803.029	741.37	0.759065	-0.397704	#N/A	#N/A	#N/A	#N/A	#N/A	#N/A	#N/A	#N/A	SF1	#N/A	#N/A	#N/A	#N/A		STIMATE				MT-ND4	GABRP			ELF5
sp|Q15654|TRIP6_HUMAN	TRIP6	TRIP6_HUMAN Thyroid receptor-interacting protein 6	2	138.036	134.142	136.089	83.6199	87.5722	85.596	0.628971	-0.668934	115.929	95.4973	105.713	0.776794	-0.364396	110.955	94.0229	102.489	0.753102	-0.409082	96.2787	117.274	106.776	0.784607	-0.349958	#N/A	#N/A	#N/A	#N/A	#N/A	#N/A	#N/A	#N/A	#N/A	#N/A	#N/A	#N/A	#N/A		STS				MT-ND4L	GABRQ			ELK1
sp|P31350-2|RIR2_HUMAN	RRM2	RIR2_HUMAN Isoform 2 of Ribonucleoside-diphosphate reductase subunit M2	8	2362.76	1846.43	2104.6	1158.58	1493.17	1325.88	0.629991	-0.666598	1959.69	1651.99	1805.84	0.858046	-0.220873	1809.3	1735.27	1772.28	0.842103	-0.247932	1421.66	1475.54	1448.6	0.688303	-0.538883	#N/A	#N/A	#N/A	#N/A	#N/A	#N/A	#N/A	#N/A	#N/A	RRM2	#N/A	#N/A	#N/A		STT3A				MT-ND5	GABRR1			ELK3
sp|O00712-5|NFIB_HUMAN	NFIB	NFIB_HUMAN Isoform 5 of Nuclear factor 1 B-type	1	93.9945	97.2769	95.6357	53.7629	66.8622	60.3126	0.630649	-0.665091	76.742	79.7095	78.2258	0.817956	-0.289906	86.6438	85.6655	86.1547	0.900863	-0.150621	68.4276	79.1057	73.7666	0.77133	-0.374581	#N/A	#N/A	#N/A	#N/A	#N/A	#N/A	#N/A	#N/A	NFIB	#N/A	#N/A	#N/A	#N/A		STT3B				MT-ND6	GABRR2			ELK4
sp|Q12972|PP1R8_HUMAN	PPP1R8	PP1R8_HUMAN Nuclear inhibitor of protein phosphatase 1	1	41.9404	32.1485	37.0444	23.3649	23.4094	23.3871	0.631327	-0.663541	25.3201	27.0766	26.1983	0.707214	-0.499781	29.3598	22.5067	25.9333	0.700058	-0.514454	24.4911	24.7632	24.6272	0.6648	-0.589008	#N/A	#N/A	#N/A	#N/A	#N/A	#N/A	#N/A	#N/A	#N/A	#N/A	#N/A	#N/A	#N/A		SUCO				MTCH1	GABRR3			ELL
tr|H3BT12|H3BT12_HUMAN	FEM1B	H3BT12_HUMAN Protein fem-1 homolog B (Fragment)	1	435.181	421.215	428.198	260.777	279.97	270.374	0.631422	-0.663324	293.167	248.129	270.648	0.632063	-0.66186	282.399	283.071	282.735	0.66029	-0.598828	249.524	361.594	305.559	0.713593	-0.486827	#N/A	#N/A	#N/A	#N/A	#N/A	#N/A	#N/A	#N/A	#N/A	#N/A	#N/A	#N/A	#N/A		SUMF1				MTCH2	GALR1			ELL2
sp|Q96K17|BT3L4_HUMAN	BTF3L4	BT3L4_HUMAN Transcription factor BTF3 homolog 4	11	5138.09	5253.65	5195.87	3173.24	3390.63	3281.93	0.631643	-0.662819	3945.71	3966.39	3956.05	0.761384	-0.393305	3911.45	3607.61	3759.53	0.723561	-0.466813	3272.99	3398.89	3335.94	0.642037	-0.639272	#N/A	#N/A	#N/A	#N/A	#N/A	#N/A	#N/A	#N/A	#N/A	#N/A	#N/A	#N/A	#N/A		SUMF2				MTERF1	GALR2			ELL3
sp|Q04726|TLE3_HUMAN	TLE3	TLE3_HUMAN Transducin-like enhancer protein 3	2	293.711	343.432	318.572	206.45	196.316	201.383	0.632144	-0.661675	243.467	218.785	231.126	0.725507	-0.462938	263.165	231.383	247.274	0.776196	-0.365507	200.627	351.081	275.854	0.865909	-0.207712	#N/A	#N/A	#N/A	#N/A	#N/A	#N/A	#N/A	#N/A	TLE3	#N/A	#N/A	#N/A	#N/A		SYVN1				MTERF2	GALR3			ELMSAN1
sp|P27658|CO8A1_HUMAN	COL8A1	CO8A1_HUMAN Collagen alpha-1(VIII) chain	10	2105.19	2679.21	2392.2	1451.27	1581.34	1516.3	0.633854	-0.657778	1646.72	1266.48	1456.6	0.608896	-0.715733	1673.83	2008.39	1841.11	0.76963	-0.377762	1534.25	2785.25	2159.75	0.90283	-0.147474	#N/A	#N/A	#N/A	#N/A	#N/A	#N/A	#N/A	#N/A	#N/A	#N/A	#N/A	#N/A	#N/A		TAP1				MTERF3	GAPT			ELOA
sp|Q01085-2|TIAR_HUMAN	TIAL1	TIAR_HUMAN Isoform 2 of Nucleolysin TIAR	1	25.6312	29.1386	27.3849	12.2143	22.5266	17.3704	0.634308	-0.656745	14.5506	25.3738	19.9622	0.728949	-0.45611	20.4109	20.8404	20.6257	0.753176	-0.408941	16.9345	20.0717	18.5031	0.675668	-0.565614	#N/A	#N/A	#N/A	#N/A	#N/A	#N/A	#N/A	#N/A	#N/A	#N/A	#N/A	#N/A	#N/A		TAP2				MTERF4	GAS1			ELOA2
sp|Q9BY42|RTF2_HUMAN	RTFDC1	RTF2_HUMAN Protein RTF2 homolog	1	24.7286	14.5193	19.624	11.5259	13.4851	12.5055	0.637257	-0.650053	19.4644	21.9823	20.7233	1.05602	0.0786418	22.6445	14.9356	18.7901	0.957506	-0.0626466	15.7114	21.9184	18.8149	0.958772	-0.0607398	#N/A	#N/A	#N/A	#N/A	#N/A	#N/A	#N/A	#N/A	#N/A	#N/A	#N/A	#N/A	#N/A		TAPBP				MTFMT	GCGR			ELOA3
sp|Q9HAW4|CLSPN_HUMAN	CLSPN	CLSPN_HUMAN Claspin	2	145.999	123.311	134.655	78.3517	93.3949	85.8733	0.637728	-0.648986	111.178	106.635	108.906	0.808782	-0.306178	139.571	93.4934	116.532	0.865413	-0.208539	92.0937	124.323	108.208	0.803597	-0.315456	#N/A	#N/A	#N/A	#N/A	#N/A	#N/A	#N/A	#N/A	CLSPN	#N/A	#N/A	#N/A	#N/A		TBXAS1				MTFP1	GFRA2			ELOA3B
sp|Q96NT5|PCFT_HUMAN	SLC46A1	PCFT_HUMAN Proton-coupled folate transporter	3	990.906	1455.21	1223.06	824.284	736.329	780.306	0.637996	-0.64838	1050.58	687.577	869.078	0.710578	-0.492934	735.344	924.722	830.033	0.678654	-0.559252	700.624	1142.86	921.742	0.753637	-0.408058	#N/A	#N/A	#N/A	#N/A	#N/A	#N/A	#N/A	#N/A	#N/A	#N/A	#N/A	#N/A	#N/A		TECR				MTFR1	GFRA3			ELOA3C
sp|Q96FH0|MF2NB_HUMAN	MEF2BNB	MF2NB_HUMAN Protein MEF2BNB	9	2786.04	2831.49	2808.76	1834.77	1749.28	1792.03	0.638012	-0.648345	2298.44	1886.57	2092.51	0.744991	-0.424705	2178.92	2393.02	2285.97	0.81387	-0.297129	1981.31	1826.05	1903.68	0.677764	-0.561145	#N/A	#N/A	#N/A	#N/A	#N/A	#N/A	#N/A	#N/A	#N/A	#N/A	#N/A	#N/A	#N/A		TECRL				MTFR2	GFRAL			ELOA3D
sp|Q13547|HDAC1_HUMAN	HDAC1	HDAC1_HUMAN Histone deacetylase 1	5	752.727	815.292	784.01	517.867	485.161	501.514	0.639678	-0.644581	580.814	493.27	537.042	0.684994	-0.545836	525.992	610.453	568.222	0.724765	-0.464415	551.129	611.602	581.365	0.741529	-0.431426	#N/A	#N/A	#N/A	#N/A	#N/A	#N/A	#N/A	#N/A	HDAC1	#N/A	#N/A	#N/A	#N/A		TEX264				MTG1	GGT1			ELOB
sp|Q9BTY2|FUCO2_HUMAN	FUCA2	FUCO2_HUMAN Plasma alpha-L-fucosidase	19	7116.12	8009.91	7563.01	4869.42	4815.56	4842.49	0.640286	-0.643212	5484.54	4853.97	5169.26	0.683491	-0.549005	5683.7	6117.01	5900.35	0.780159	-0.35816	5138.38	8081.4	6609.89	0.873976	-0.194335	#N/A	#N/A	#N/A	#N/A	#N/A	#N/A	#N/A	#N/A	#N/A	#N/A	#N/A	#N/A	#N/A		TFG				MTG2	GHRHR			ELOC
sp|P12259|FA5_HUMAN	F5	FA5_HUMAN Coagulation factor V	6	960.961	705.901	833.431	510.025	560.053	535.039	0.641972	-0.639419	920.399	641.955	781.177	0.937303	-0.0934133	708.964	992.545	850.755	1.02079	0.0296801	780.618	727.399	754.009	0.904704	-0.144482	#N/A	#N/A	#N/A	#N/A	#N/A	#N/A	#N/A	#N/A	#N/A	#N/A	#N/A	#N/A	#N/A		TM4SF20				MTHFD1L	GHSR			ELOF1
sp|Q5VTE0|EF1A3_HUMAN	EEF1A1P5	EF1A3_HUMAN Putative elongation factor 1-alpha-like 3	87	45979.4	49451.8	47715.6	30285.3	31036.9	30661.1	0.64258	-0.638052	35833.2	34023.9	34928.6	0.732015	-0.450054	34352.4	30800.4	32576.4	0.68272	-0.550634	28023.9	45722.4	36873.2	0.772769	-0.37189	#N/A	#N/A	#N/A	#N/A	#N/A	#N/A	#N/A	#N/A	#N/A	EEF1A1P5	#N/A	#N/A	#N/A		TM7SF2				MTHFD2	GIPR			EMD
sp|Q8IYB3|SRRM1_HUMAN	SRRM1	SRRM1_HUMAN Serine/arginine repetitive matrix protein 1	3	473.22	545.942	509.581	307.147	347.981	327.564	0.64281	-0.637535	366.297	446.392	406.345	0.797409	-0.326608	380.43	397.45	388.94	0.763255	-0.389764	386.919	489.821	438.37	0.860256	-0.217162	#N/A	#N/A	#N/A	#N/A	#N/A	#N/A	#N/A	#N/A	SRRM1	#N/A	#N/A	#N/A	#N/A		TMBIM6				MTHFD2L	GJA10			EME1
sp|Q9NZ63|CI078_HUMAN	C9orf78	CI078_HUMAN Uncharacterized protein C9orf78	3	271.771	266.426	269.099	154.543	191.571	173.057	0.643099	-0.636887	189.605	222.332	205.969	0.765402	-0.385711	248.631	171.675	210.153	0.780952	-0.356694	183.497	227.243	205.37	0.763178	-0.389909	#N/A	#N/A	#N/A	#N/A	#N/A	#N/A	#N/A	#N/A	#N/A	#N/A	#N/A	#N/A	#N/A		TMC6				MTIF2	GJA3			EME2
sp|Q96SL1|DIRC2_HUMAN	DIRC2	DIRC2_HUMAN Disrupted in renal carcinoma protein 2	2	124.089	135.258	129.673	84.0668	82.8062	83.4365	0.643435	-0.636133	132.018	92.4025	112.21	0.865329	-0.208679	75.7724	103.948	89.8602	0.692973	-0.52913	83.0618	108.332	95.6969	0.737983	-0.43834	#N/A	#N/A	#N/A	#N/A	#N/A	#N/A	#N/A	#N/A	#N/A	#N/A	#N/A	#N/A	#N/A		TMC8				MTIF3	GJA4			EMG1
sp|P53985|MOT1_HUMAN	SLC16A1	MOT1_HUMAN Monocarboxylate transporter 1	2	384.833	484.97	434.902	263.728	296.075	279.901	0.643597	-0.635769	304.446	308.921	306.683	0.705179	-0.503938	319.385	311.588	315.486	0.725421	-0.46311	334.223	651.852	493.038	1.13368	0.181009	#N/A	#N/A	#N/A	#N/A	#N/A	SLC16A1	#N/A	#N/A	#N/A	#N/A	#N/A	#N/A	#N/A		TMCC1				MTLN	GJA5			EMSY
sp|Q8WUI4-8|HDAC7_HUMAN	HDAC7	HDAC7_HUMAN Isoform 8 of Histone deacetylase 7	5	321.981	293.962	307.971	200.597	196.641	198.619	0.644927	-0.632793	226.16	237.884	232.022	0.753388	-0.408535	245.791	215.833	230.812	0.749459	-0.416079	216.441	241.619	229.03	0.743673	-0.42726	#N/A	#N/A	#N/A	#N/A	#N/A	#N/A	#N/A	#N/A	#N/A	#N/A	#N/A	#N/A	#N/A		TMCC2				MTO1	GJA8			EMX2
sp|Q8WU90|ZC3HF_HUMAN	ZC3H15	ZC3HF_HUMAN Zinc finger CCCH domain-containing protein 15	3	480.648	575.802	528.225	345.97	337.228	341.599	0.646692	-0.628849	362.565	437.233	399.899	0.757062	-0.401517	409.828	332.028	370.928	0.702216	-0.510013	331.081	652.423	491.752	0.930952	-0.103222	#N/A	#N/A	#N/A	#N/A	#N/A	#N/A	#N/A	#N/A	#N/A	#N/A	#N/A	#N/A	#N/A		TMCC3				MTRES1	GJA9			EN1
sp|O43567|RNF13_HUMAN	RNF13	RNF13_HUMAN E3 ubiquitin-protein ligase RNF13	17	5109.25	6098.6	5603.93	3671.55	3578.99	3625.27	0.646916	-0.628349	3686.87	3407.26	3547.07	0.632961	-0.659812	3950.72	3999.15	3974.93	0.709313	-0.495506	3612.6	6780.96	5196.78	0.927346	-0.10882	#N/A	#N/A	#N/A	#N/A	#N/A	#N/A	#N/A	#N/A	#N/A	#N/A	#N/A	#N/A	#N/A		TMED4				MTRF1	GJB1			EN2
sp|Q9BY77|PDIP3_HUMAN	POLDIP3	PDIP3_HUMAN Polymerase delta-interacting protein 3	4	1110.26	1004.95	1057.61	584.845	784.053	684.449	0.647169	-0.627786	756.865	808.475	782.67	0.74004	-0.434325	813.635	824.332	818.984	0.774376	-0.368895	799.337	816.32	807.829	0.763828	-0.38868	#N/A	#N/A	#N/A	#N/A	#N/A	#N/A	#N/A	#N/A	#N/A	#N/A	#N/A	#N/A	#N/A		TMED6				MTRF1L	GJB2			ENY2
sp|Q9HCM3|K1549_HUMAN	KIAA1549	K1549_HUMAN UPF0606 protein KIAA1549	1	123.481	134.512	128.996	81.1882	85.902	83.5451	0.647654	-0.626705	95.3485	81.3755	88.362	0.684995	-0.545834	86.6898	102.379	94.5344	0.732845	-0.448421	79.5042	160.516	120.01	0.930336	-0.104176	#N/A	#N/A	#N/A	#N/A	#N/A	#N/A	#N/A	#N/A	#N/A	#N/A	#N/A	#N/A	#N/A		TMEM106C				MTX1	GJB3			EOMES
sp|Q8WX93|PALLD_HUMAN	PALLD	PALLD_HUMAN Palladin	23	4616.19	4458.25	4537.22	2837.77	3040.39	2939.08	0.647771	-0.626444	3278.7	3382.23	3330.47	0.734032	-0.446085	3871.16	3226.53	3548.85	0.782163	-0.354459	3017.54	3966.66	3492.1	0.769656	-0.377714	#N/A	#N/A	#N/A	#N/A	#N/A	#N/A	#N/A	#N/A	#N/A	#N/A	#N/A	#N/A	#N/A		TMEM129				MTX2	GJB4			EP400
sp|Q969J3|L12R1_HUMAN	LOH12CR1	L12R1_HUMAN Loss of heterozygosity 12 chromosomal region 1 protein	16	6051.11	5997.26	6024.18	3998.44	3807.13	3902.78	0.647853	-0.626262	4893.82	4067.75	4480.78	0.743799	-0.427015	4641.83	4995.41	4818.62	0.799879	-0.322146	4781.12	3713.34	4247.23	0.70503	-0.504244	#N/A	#N/A	#N/A	#N/A	#N/A	#N/A	#N/A	#N/A	#N/A	#N/A	#N/A	#N/A	#N/A		TMEM147				MTX3	GJB5			EPAS1
sp|Q9BZK7|TBL1R_HUMAN	TBL1XR1	TBL1R_HUMAN F-box-like/WD repeat-containing protein TBL1XR1	7	992.2	1079.37	1035.78	697.279	644.902	671.091	0.647905	-0.626145	831.299	791.24	811.269	0.783241	-0.352471	810.468	721.834	766.151	0.739681	-0.435024	719.763	902.697	811.23	0.783203	-0.352542	#N/A	#N/A	#N/A	#N/A	#N/A	#N/A	#N/A	#N/A	TBL1XR1	#N/A	#N/A	#N/A	#N/A		TMEM174				NADK2	GJB6			EPC1
sp|P82979|SARNP_HUMAN	SARNP	SARNP_HUMAN SAP domain-containing ribonucleoprotein	4	461.047	461.862	461.455	262.444	335.584	299.014	0.647982	-0.625975	318.682	429.623	374.153	0.810811	-0.302562	374.944	355.743	365.344	0.791722	-0.336935	398.727	395.367	397.047	0.860425	-0.216879	#N/A	#N/A	#N/A	#N/A	#N/A	#N/A	#N/A	#N/A	SARNP	#N/A	#N/A	#N/A	#N/A		TMEM178A				NAGS	GJB7			EPC2
sp|A6NJ78|MET15_HUMAN	METTL15	MET15_HUMAN Probable methyltransferase-like protein 15	1	575.755	597.693	586.724	364.759	395.757	380.258	0.648104	-0.625703	456.059	389.309	422.684	0.720414	-0.473103	454.892	523.839	489.365	0.834064	-0.26177	430.31	479.981	455.145	0.77574	-0.366354	#N/A	#N/A	#N/A	#N/A	#N/A	#N/A	#N/A	#N/A	#N/A	#N/A	#N/A	#N/A	#N/A		TMEM189				NARS2	GJC1			EPM2A
sp|P46937-9|YAP1_HUMAN	YAP1	YAP1_HUMAN Isoform 9 of Yorkie homolog	7	298.291	282.868	290.579	165.26	211.531	188.395	0.648344	-0.625168	248.091	246.865	247.478	0.851671	-0.231633	238.964	211.373	225.168	0.774895	-0.367928	228.064	270.309	249.187	0.85755	-0.221707	#N/A	#N/A	#N/A	#N/A	#N/A	#N/A	#N/A	#N/A	#N/A	#N/A	#N/A	#N/A	#N/A		TMEM203				NAXD	GJC2			EPOP
sp|P50616|TOB1_HUMAN	TOB1	TOB1_HUMAN Protein Tob1	1	66.0925	72.555	69.3238	44.5225	45.4375	44.98	0.64884	-0.624066	55.1192	53.249	54.1841	0.781609	-0.35548	49.0555	48.9611	49.0083	0.706948	-0.500324	53.7846	65.8234	59.804	0.862677	-0.213108	#N/A	#N/A	#N/A	#N/A	#N/A	#N/A	#N/A	#N/A	#N/A	#N/A	#N/A	#N/A	#N/A		TMEM208				NDUFA1	GJC3			ERCC3
sp|P35269|T2FA_HUMAN	GTF2F1	T2FA_HUMAN General transcription factor IIF subunit 1	2	168.656	169.197	168.927	102.891	116.322	109.607	0.648841	-0.624062	147.799	152.09	149.945	0.887632	-0.171967	140.773	114.855	127.814	0.756625	-0.40235	122.222	174.532	148.377	0.878352	-0.187128	#N/A	#N/A	#N/A	#N/A	#N/A	#N/A	#N/A	#N/A	GTF2F1	#N/A	#N/A	#N/A	#N/A		TMEM214				NDUFA10	GJD2			ERCC4
sp|Q9Y646|CBPQ_HUMAN	CPQ	CBPQ_HUMAN Carboxypeptidase Q	7	1737.27	1785.81	1761.54	1122.67	1165.88	1144.28	0.649588	-0.622403	1390.16	1197.91	1294.04	0.734604	-0.444961	1393.82	1448.86	1421.34	0.806874	-0.309586	1311.82	1656	1483.91	0.842394	-0.247434	#N/A	#N/A	#N/A	#N/A	#N/A	#N/A	#N/A	#N/A	#N/A	#N/A	#N/A	#N/A	#N/A		TMEM235				NDUFA11	GJD3			ERCC5
sp|Q9BY67-3|CADM1_HUMAN	CADM1	CADM1_HUMAN Isoform 3 of Cell adhesion molecule 1	2	32.9611	58.8276	45.8944	31.8082	28.3044	30.0563	0.654902	-0.610649	25.4915	32.5572	29.0243	0.632417	-0.661053	33.8473	29.957	31.9021	0.695122	-0.524663	37.6102	56.6488	47.1295	1.02691	0.0383138	#N/A	#N/A	#N/A	#N/A	#N/A	CADM1	#N/A	#N/A	#N/A	#N/A	#N/A	#N/A	#N/A		TMEM258				NDUFA12	GJD4			ERCC6
sp|O14817|TSN4_HUMAN	TSPAN4	TSN4_HUMAN Tetraspanin-4	1	17.0987	15.1603	16.1295	11.9979	9.17597	10.5869	0.656371	-0.607417	14.6645	16.7722	15.7184	0.974509	-0.0372519	13.8479	13.8219	13.8349	0.857739	-0.22139	13.1563	14.2247	13.6905	0.848786	-0.236527	#N/A	#N/A	#N/A	#N/A	#N/A	#N/A	#N/A	#N/A	#N/A	#N/A	#N/A	#N/A	#N/A		TMEM259				NDUFA2	GJE1			ERCC6
sp|Q13148|TADBP_HUMAN	TARDBP	TADBP_HUMAN TAR DNA-binding protein 43	20	13522.8	13379	13450.9	8163.32	9501.18	8832.25	0.656629	-0.60685	10535.9	11084.5	10810.2	0.803679	-0.315309	9167.84	9060.15	9113.99	0.677575	-0.561547	7344.24	10440.3	8892.27	0.661091	-0.597079	#N/A	#N/A	#N/A	#N/A	#N/A	#N/A	#N/A	#N/A	#N/A	#N/A	#N/A	#N/A	#N/A		TMEM38B				NDUFA3	GLP1R			ERCC8
sp|P26358-2|DNMT1_HUMAN	DNMT1	DNMT1_HUMAN Isoform 2 of DNA (cytosine-5)-methyltransferase 1	4	735.036	882.315	808.676	500.181	562.083	531.132	0.656792	-0.60649	652.862	665.341	659.101	0.815038	-0.29506	569.732	563.31	566.521	0.700554	-0.513431	477.404	739.221	608.312	0.752233	-0.410748	#N/A	#N/A	#N/A	#N/A	#N/A	#N/A	#N/A	#N/A	DNMT1	#N/A	#N/A	#N/A	#N/A		TMEM41B				NDUFA4	GLP2R			ERF
sp|Q9H3Q1|BORG4_HUMAN	CDC42EP4	BORG4_HUMAN Cdc42 effector protein 4	5	576.831	518.78	547.805	356.431	363.865	360.148	0.657438	-0.605074	443.566	433.636	438.601	0.800651	-0.320755	454.906	389.025	421.966	0.770283	-0.376539	390.881	497.35	444.115	0.810717	-0.302729	#N/A	#N/A	#N/A	#N/A	#N/A	#N/A	#N/A	#N/A	#N/A	#N/A	#N/A	#N/A	#N/A		TMEM64				NDUFA5	GLRA1			ERFL
sp|Q8TCT8|SPP2A_HUMAN	SPPL2A	SPP2A_HUMAN Signal peptide peptidase-like 2A	10	3622.46	4652.78	4137.62	2719.43	2723.65	2721.54	0.657755	-0.604378	3170.19	2552.4	2861.3	0.691532	-0.532133	2845.01	3247.3	3046.16	0.736209	-0.441812	2562.43	4395.38	3478.9	0.840799	-0.250168	#N/A	#N/A	#N/A	#N/A	#N/A	#N/A	SPPL2A	#N/A	#N/A	#N/A	#N/A	#N/A	#N/A		TMPRSS3				NDUFA6	GLRA2			ERVK-10
sp|P48739-2|PIPNB_HUMAN	PITPNB	PIPNB_HUMAN Isoform 2 of Phosphatidylinositol transfer protein beta isoform	1	307.278	358.927	333.103	229.281	209.146	219.214	0.658096	-0.60363	252.474	240.492	246.483	0.739961	-0.434478	282.011	247.849	264.93	0.795341	-0.330355	198.987	330.556	264.772	0.794865	-0.331218	#N/A	#N/A	#N/A	#N/A	#N/A	#N/A	#N/A	#N/A	#N/A	#N/A	#N/A	#N/A	#N/A		TMTC1				NDUFA7	GLRA3			ERVK-24
sp|P07384|CAN1_HUMAN	CAPN1	CAN1_HUMAN Calpain-1 catalytic subunit	12	1969.04	1954.21	1961.62	1263.79	1320.59	1292.19	0.658734	-0.602231	1777.9	2111.16	1944.53	0.991285	-0.0126278	1475.61	1385.74	1430.67	0.729332	-0.455353	1389.25	1617.3	1503.28	0.766342	-0.38394	#N/A	#N/A	#N/A	#N/A	#N/A	#N/A	#N/A	#N/A	#N/A	#N/A	#N/A	#N/A	#N/A		TMTC2				NDUFA8	GML			ERVK-5
sp|Q92733|PRCC_HUMAN	PRCC	PRCC_HUMAN Proline-rich protein PRCC	2	653.778	646.669	650.224	389.506	467.781	428.644	0.659225	-0.601157	442.09	574.415	508.252	0.781658	-0.35539	546.784	479.39	513.087	0.789093	-0.341732	458.434	577.927	518.181	0.796927	-0.327481	#N/A	#N/A	#N/A	#N/A	#N/A	#N/A	#N/A	#N/A	PRCC	#N/A	#N/A	#N/A	#N/A		TMTC3				NDUFA9	GNAO1			ERVK-7
sp|P85037|FOXK1_HUMAN	FOXK1	FOXK1_HUMAN Forkhead box protein K1	1	95.8045	102.522	99.1633	63.4258	67.3991	65.4125	0.659644	-0.60024	72.1367	90.3184	81.2276	0.81913	-0.287836	81.4722	73.317	77.3946	0.780477	-0.357573	61.9934	86.4123	74.2028	0.74829	-0.418331	#N/A	#N/A	#N/A	#N/A	#N/A	#N/A	#N/A	#N/A	#N/A	#N/A	#N/A	#N/A	#N/A		TMTC4				NDUFAB1	GNAS			ESCO1
sp|Q9Y3D6|FIS1_HUMAN	FIS1	FIS1_HUMAN Mitochondrial fission 1 protein	5	1985.64	2015.16	2000.4	1303.45	1337.67	1320.56	0.660148	-0.599139	1575.25	1437.84	1506.55	0.753122	-0.409045	1464.59	1378.26	1421.42	0.71057	-0.492951	1275.74	1327.59	1301.66	0.650702	-0.61993	#N/A	#N/A	#N/A	#N/A	#N/A	#N/A	#N/A	#N/A	#N/A	#N/A	#N/A	#N/A	#N/A		TMX1				NDUFAF1	GNAS			ESCO2
sp|O75400|PR40A_HUMAN	PRPF40A	PR40A_HUMAN Pre-mRNA-processing factor 40 homolog A	15	2836.84	3136.04	2986.44	1747.03	2198.77	1972.9	0.660619	-0.598109	1926.95	2976.82	2451.89	0.821006	-0.284535	2284.04	2260.64	2272.34	0.760886	-0.394248	2510.43	2915.43	2712.93	0.908416	-0.138575	#N/A	#N/A	#N/A	#N/A	#N/A	#N/A	#N/A	#N/A	PRPF40A	#N/A	#N/A	#N/A	#N/A		TMX3				NDUFAF2	GNAS			ESF1
sp|Q92734|TFG_HUMAN	TFG	TFG_HUMAN Protein TFG	12	1988.07	2022.66	2005.37	1304.93	1350.77	1327.85	0.662149	-0.594773	1695.05	1546.98	1621.01	0.808339	-0.306967	1448.91	1503.83	1476.37	0.73621	-0.441811	1213	1657.48	1435.24	0.7157	-0.482573	TFG	#N/A	#N/A	#N/A	#N/A	#N/A	#N/A	#N/A	#N/A	#N/A	#N/A	#N/A	#N/A		TOR2A				NDUFAF4	GNG14			ESR2
sp|Q5T6F2|UBAP2_HUMAN	UBAP2	UBAP2_HUMAN Ubiquitin-associated protein 2	31	6996.83	5895.59	6446.21	4002.72	4544.6	4273.66	0.662973	-0.592979	4963.21	5233.67	5098.44	0.790921	-0.338395	5585.12	4908.11	5246.61	0.813907	-0.297064	4537.04	5648.28	5092.66	0.790024	-0.340032	#N/A	#N/A	#N/A	#N/A	#N/A	#N/A	#N/A	#N/A	#N/A	#N/A	#N/A	#N/A	#N/A		TPTE2				NDUFAF5	GNRHR			ESRG
sp|Q15056|IF4H_HUMAN	EIF4H	IF4H_HUMAN Eukaryotic translation initiation factor 4H	3	378.488	370.662	374.575	237.422	259.413	248.418	0.663198	-0.592488	251.969	356.256	304.112	0.811887	-0.300649	336.647	267.631	302.139	0.806618	-0.310042	262.143	243.414	252.778	0.674841	-0.567381	#N/A	#N/A	#N/A	#N/A	#N/A	#N/A	#N/A	#N/A	#N/A	#N/A	#N/A	#N/A	#N/A		TRAM1				NDUFAF6	GNRHR2			ESRP1
sp|P09884|DPOLA_HUMAN	POLA1	DPOLA_HUMAN DNA polymerase alpha catalytic subunit	1	76.978	85.1751	81.0765	51.0105	56.8921	53.9513	0.665437	-0.587627	80.1368	77.4192	78.778	0.97165	-0.0414919	73.1073	68.1785	70.6429	0.871311	-0.19874	54.281	88.8719	71.5764	0.882826	-0.1798	#N/A	#N/A	#N/A	#N/A	#N/A	#N/A	#N/A	#N/A	#N/A	#N/A	#N/A	#N/A	#N/A		TRAM1L1				NDUFAF7	GP6			ESRP2
sp|P18583-9|SON_HUMAN	SON	SON_HUMAN Isoform I of Protein SON	1	108.074	89.1419	98.608	55.1809	76.0732	65.627	0.665535	-0.587413	79.4684	93.1307	86.2996	0.875178	-0.192351	75.0687	85.8653	80.467	0.81603	-0.293307	64.4623	76.212	70.3372	0.713301	-0.487417	#N/A	#N/A	#N/A	#N/A	#N/A	#N/A	#N/A	#N/A	SON	#N/A	#N/A	#N/A	#N/A		TRIM13				NDUFAF8	GPBAR1			ESRRG
sp|P02462|CO4A1_HUMAN	COL4A1	CO4A1_HUMAN Collagen alpha-1(IV) chain	1	241.427	252.929	247.178	167.174	162.661	164.918	0.667201	-0.583806	184.682	160.252	172.467	0.697744	-0.51923	196.532	214.709	205.62	0.831872	-0.265566	156.224	256.752	206.488	0.835382	-0.259492	#N/A	#N/A	#N/A	#N/A	#N/A	#N/A	#N/A	#N/A	#N/A	#N/A	#N/A	#N/A	#N/A		TRIM59				NDUFB1	GPC3			ESS2
sp|Q7Z5L9|I2BP2_HUMAN	IRF2BP2	I2BP2_HUMAN Interferon regulatory factor 2-binding protein 2	12	3108.57	2775.39	2941.98	1946.84	1981.93	1964.38	0.667708	-0.58271	2498.74	2308.59	2403.66	0.817023	-0.291552	2304.43	2161.49	2232.96	0.758999	-0.39783	1903.54	2047.67	1975.61	0.671522	-0.574493	#N/A	#N/A	#N/A	#N/A	#N/A	#N/A	#N/A	#N/A	#N/A	#N/A	#N/A	#N/A	#N/A		TRIQK				NDUFB10	GPIHBP1			ETAA1
sp|Q8WU79|SMAP2_HUMAN	SMAP2	SMAP2_HUMAN Stromal membrane-associated protein 2	2	503.612	440.385	471.999	321.365	309.323	315.344	0.668104	-0.581856	385.056	361.881	373.468	0.791249	-0.337796	365.047	314.656	339.851	0.720027	-0.473878	278.158	338.984	308.571	0.653754	-0.61318	#N/A	#N/A	#N/A	#N/A	#N/A	#N/A	#N/A	#N/A	#N/A	#N/A	#N/A	#N/A	#N/A		TSPO2				NDUFB11	GPM6A			ETS2
sp|Q8NCF5|NF2IP_HUMAN	NFATC2IP	NF2IP_HUMAN NFATC2-interacting protein	1	121.119	102.463	111.791	70.9362	78.8405	74.8884	0.669896	-0.577991	81.8469	99.9554	90.9012	0.813135	-0.298434	83.781	80.6679	82.2245	0.735519	-0.443165	69.0786	95.6009	82.3397	0.736551	-0.441143	#N/A	#N/A	#N/A	#N/A	#N/A	#N/A	#N/A	#N/A	#N/A	#N/A	#N/A	#N/A	#N/A		TTMP				NDUFB2	GPM6B			ETV1
sp|P49281-3|NRAM2_HUMAN	SLC11A2	NRAM2_HUMAN Isoform 3 of Natural resistance-associated macrophage protein 2	2	766.867	1026.46	896.663	594.57	607.202	600.886	0.670135	-0.577475	711.766	525.96	618.863	0.690184	-0.534947	619.121	782.541	700.831	0.781599	-0.3555	533.478	855.75	694.614	0.774665	-0.368355	#N/A	#N/A	#N/A	#N/A	#N/A	#N/A	#N/A	#N/A	#N/A	#N/A	#N/A	#N/A	#N/A		TUSC3				NDUFB3	GPR1			ETV2
sp|O60784-2|TOM1_HUMAN	TOM1	TOM1_HUMAN Isoform 2 of Target of Myb protein 1	4	229.196	233.231	231.214	144.611	165.561	155.086	0.670748	-0.576157	177.959	170.376	174.168	0.753276	-0.40875	199.941	216.374	208.157	0.900283	-0.15155	186.896	158.795	172.845	0.747558	-0.419743	#N/A	#N/A	#N/A	#N/A	#N/A	#N/A	#N/A	#N/A	#N/A	#N/A	#N/A	#N/A	#N/A		TXNDC11				NDUFB4	GPR101			ETV3
sp|Q8IWZ8|SUGP1_HUMAN	SUGP1	SUGP1_HUMAN SURP and G-patch domain-containing protein 1	2	231.863	207.47	219.666	133.213	161.749	147.481	0.671386	-0.574786	165.68	204.271	184.976	0.842074	-0.247981	167.641	189.068	178.355	0.811933	-0.300567	164.214	154.499	159.356	0.725447	-0.463057	#N/A	#N/A	#N/A	#N/A	#N/A	#N/A	#N/A	#N/A	SUGP1	#N/A	#N/A	#N/A	#N/A		TXNDC12				NDUFB5	GPR119			ETV3L
sp|Q9UKJ3|GPTC8_HUMAN	GPATCH8	GPTC8_HUMAN G patch domain-containing protein 8	11	1709.07	1625.15	1667.11	1129.16	1110.79	1119.97	0.671806	-0.573883	1351.23	1353.59	1352.41	0.81123	-0.301817	1328.69	1204.1	1266.39	0.759635	-0.396622	1172.94	1334.16	1253.55	0.75193	-0.41133	#N/A	#N/A	#N/A	#N/A	#N/A	#N/A	#N/A	#N/A	#N/A	#N/A	#N/A	#N/A	#N/A		TXNDC5				NDUFB6	GPR12			ETV4
sp|Q8N5A5|ZGPAT_HUMAN	ZGPAT	ZGPAT_HUMAN Zinc finger CCCH-type with G patch domain-containing protein	2	506.38	482.668	494.524	313.072	352.202	332.637	0.672641	-0.572092	407.036	452.31	429.673	0.868862	-0.202801	411.897	387.508	399.702	0.808257	-0.307114	301.21	370.557	335.884	0.679206	-0.55808	#N/A	#N/A	#N/A	#N/A	#N/A	#N/A	#N/A	#N/A	ZGPAT	#N/A	#N/A	#N/A	#N/A		UBAC2				NDUFB7	GPR132			ETV5
sp|P49321-3|NASP_HUMAN	NASP	NASP_HUMAN Isoform 3 of Nuclear autoantigenic sperm protein	17	3812.9	3244.99	3528.94	2299.1	2450.39	2374.74	0.672933	-0.571464	2879.66	3132.98	3006.32	0.851903	-0.231238	3113.44	2754.15	2933.8	0.831352	-0.266469	2302.85	2380.25	2341.55	0.663527	-0.591773	#N/A	#N/A	#N/A	#N/A	#N/A	#N/A	#N/A	#N/A	#N/A	#N/A	#N/A	#N/A	#N/A		UBE2J1				NDUFB8	GPR139			ETV6
sp|Q7Z3F1|GP155_HUMAN	GPR155	GP155_HUMAN Integral membrane protein GPR155	5	1155.91	1389.35	1272.63	896.09	823.507	859.798	0.675608	-0.565743	1221.59	801.262	1011.43	0.794753	-0.331422	886.908	1142.45	1014.68	0.797309	-0.32679	847.109	1264.17	1055.64	0.829494	-0.269696	#N/A	#N/A	#N/A	#N/A	#N/A	#N/A	#N/A	#N/A	#N/A	#N/A	#N/A	#N/A	#N/A		UBE2J2				NDUFB9	GPR141			ETV7
sp|Q9BXK1|KLF16_HUMAN	KLF16	KLF16_HUMAN Krueppel-like factor 16	2	165.815	159.119	162.467	94.455	125.075	109.765	0.675614	-0.565729	132.582	146.498	139.54	0.858882	-0.219468	148.462	161.978	155.22	0.955394	-0.0658323	125.017	121.938	123.477	0.760016	-0.395899	#N/A	#N/A	#N/A	#N/A	#N/A	#N/A	#N/A	#N/A	KLF16	#N/A	#N/A	#N/A	#N/A		UBXN8				NDUFC1	GPR142			EVX1
sp|Q96PK6|RBM14_HUMAN	RBM14	RBM14_HUMAN RNA-binding protein 14	7	678.913	632.142	655.528	425.945	460.329	443.137	0.676001	-0.564904	403.855	493.897	448.876	0.684755	-0.546339	489.942	469.656	479.799	0.731928	-0.450226	486.298	515.777	501.038	0.764327	-0.387738	#N/A	#N/A	#N/A	#N/A	#N/A	#N/A	#N/A	#N/A	#N/A	#N/A	#N/A	#N/A	#N/A		UGT1A1				NDUFC2	GPR146			EVX2
sp|Q5JS37|NHLC3_HUMAN	NHLRC3	NHLC3_HUMAN NHL repeat-containing protein 3	16	4020.09	4213.25	4116.67	2725.62	2842.11	2783.86	0.676242	-0.564389	3019.62	2737.34	2878.48	0.699225	-0.516171	3259.42	3452.62	3356.02	0.815227	-0.294726	2889.38	4155.46	3522.42	0.855648	-0.224911	#N/A	#N/A	#N/A	#N/A	#N/A	#N/A	#N/A	#N/A	#N/A	#N/A	#N/A	#N/A	#N/A		UGT1A10				NDUFC2-KCTD14	GPR148			EXO1
sp|Q8N8S7|ENAH_HUMAN	ENAH	ENAH_HUMAN Protein enabled homolog	3	260.637	276.891	268.764	176.995	186.608	181.802	0.676435	-0.563976	224.601	233.132	228.867	0.851552	-0.231834	224.123	208.228	216.175	0.804332	-0.314137	200.327	234.571	217.449	0.80907	-0.305663	#N/A	#N/A	#N/A	#N/A	#N/A	#N/A	#N/A	#N/A	#N/A	#N/A	#N/A	#N/A	#N/A		UGT1A3				NDUFS1	GPR149			EZH1
sp|Q6XE24|RBMS3_HUMAN	RBMS3	RBMS3_HUMAN RNA-binding motif, single-stranded-interacting protein 3	2	565.997	569.747	567.872	364.498	405.13	384.814	0.677642	-0.561404	406.124	427.853	416.989	0.7343	-0.445558	453.006	431.914	442.46	0.779154	-0.360019	432.652	531.384	482.018	0.848815	-0.236479	#N/A	#N/A	#N/A	#N/A	#N/A	#N/A	#N/A	#N/A	#N/A	RBMS3	#N/A	#N/A	#N/A		UGT1A4				NDUFS2	GPR15			EZH2
sp|P57086|SCND1_HUMAN	SCAND1	SCND1_HUMAN SCAN domain-containing protein 1	2	148.576	152.742	150.659	113.079	91.1675	102.123	0.677844	-0.560976	111.748	115.867	113.808	0.755398	-0.404691	131.418	99.7003	115.559	0.767025	-0.382655	108.001	99.1936	103.597	0.687628	-0.5403	#N/A	#N/A	#N/A	#N/A	#N/A	#N/A	#N/A	#N/A	SCAND1	#N/A	#N/A	#N/A	#N/A		UGT1A5				NDUFS3	GPR150			FAAP100
sp|Q9NYR9|KBRS2_HUMAN	NKIRAS2	KBRS2_HUMAN NF-kappa-B inhibitor-interacting Ras-like protein 2	1	100.961	98.8298	99.8954	63.7703	71.6623	67.7163	0.677872	-0.560915	88.2149	79.5749	83.8949	0.839827	-0.251835	88.8191	70.4087	79.6139	0.796973	-0.327398	68.6099	60.3619	64.4859	0.645534	-0.631434	#N/A	#N/A	#N/A	#N/A	#N/A	#N/A	#N/A	#N/A	#N/A	NKIRAS2	#N/A	#N/A	#N/A		UGT1A6				NDUFS4	GPR151			FAAP20
sp|O75179|ANR17_HUMAN	ANKRD17	ANR17_HUMAN Ankyrin repeat domain-containing protein 17	9	2049.42	1872.35	1960.88	1273.8	1385.28	1329.54	0.678031	-0.560578	1619.01	1652.39	1635.7	0.834164	-0.261597	1679.92	1542.13	1611.03	0.821581	-0.283526	1358.1	1796.93	1577.51	0.804491	-0.313851	#N/A	#N/A	#N/A	#N/A	#N/A	#N/A	#N/A	#N/A	#N/A	#N/A	#N/A	#N/A	#N/A		UGT1A7				NDUFS5	GPR152			FAAP24
sp|O00233|PSMD9_HUMAN	PSMD9	PSMD9_HUMAN 26S proteasome non-ATPase regulatory subunit 9	2	156.769	139.559	148.164	102.778	98.2814	100.53	0.678503	-0.559573	134.063	125.96	130.011	0.877484	-0.188556	131.828	126.286	129.057	0.871042	-0.199187	108.008	142.94	125.474	0.846859	-0.239807	#N/A	#N/A	#N/A	#N/A	#N/A	#N/A	#N/A	#N/A	#N/A	#N/A	#N/A	#N/A	#N/A		UGT1A8				NDUFS6	GPR153			FAF1
sp|Q7L4I2|RSRC2_HUMAN	RSRC2	RSRC2_HUMAN Arginine/serine-rich coiled-coil protein 2	7	1610.05	1457.8	1533.92	979.66	1105.41	1042.54	0.679652	-0.557132	1305.73	1255.52	1280.62	0.834868	-0.26038	1168.75	1075.7	1122.22	0.731604	-0.450866	1070.21	1088.43	1079.32	0.703633	-0.507105	#N/A	#N/A	#N/A	#N/A	#N/A	#N/A	#N/A	#N/A	#N/A	#N/A	#N/A	#N/A	#N/A		UGT1A9				NDUFS7	GPR156			FAM118B
sp|Q15427|SF3B4_HUMAN	SF3B4	SF3B4_HUMAN Splicing factor 3B subunit 4	1	40.7905	45.185	42.9878	26.5076	32.1129	29.3103	0.681828	-0.55252	29.3477	37.8364	33.5921	0.781433	-0.355806	33.8735	32.3078	33.0906	0.769769	-0.377502	35.038	27.9332	31.4856	0.732432	-0.449233	#N/A	#N/A	#N/A	#N/A	#N/A	#N/A	#N/A	#N/A	SF3B4	#N/A	#N/A	#N/A	#N/A		UGT2B10				NDUFS8	GPR157			FAM120B
sp|P23588|IF4B_HUMAN	EIF4B	IF4B_HUMAN Eukaryotic translation initiation factor 4B	14	3856.99	3569.54	3713.26	2381.8	2686.99	2534.39	0.682525	-0.551047	2556.03	2984.54	2770.28	0.746051	-0.422654	2821.71	2599.96	2710.84	0.730041	-0.453951	2450.11	2973.02	2711.57	0.730237	-0.453563	#N/A	#N/A	#N/A	#N/A	#N/A	#N/A	#N/A	#N/A	#N/A	#N/A	#N/A	#N/A	#N/A		UGT2B11				NDUFV1	GPR158			FAM124B
sp|Q13887|KLF5_HUMAN	KLF5	KLF5_HUMAN Krueppel-like factor 5	11	2368.52	2448.48	2408.5	1547.95	1743.66	1645.81	0.683332	-0.549342	1798.92	1787.34	1793.13	0.744501	-0.425655	1892.44	1764.18	1828.31	0.759107	-0.397624	1483.94	2048.04	1765.99	0.733232	-0.447658	#N/A	#N/A	#N/A	#N/A	#N/A	#N/A	#N/A	#N/A	KLF5	#N/A	#N/A	#N/A	#N/A		UGT2B15				NDUFV2	GPR160			FAM169A
sp|Q5W0V3|F16B1_HUMAN	FAM160B1	F16B1_HUMAN Protein FAM160B1	1	50.9324	37.0585	43.9955	29.3136	30.8317	30.0727	0.68354	-0.548902	39.0085	41.1102	40.0593	0.910534	-0.135215	38.0548	32.1906	35.1227	0.798326	-0.324951	29.9501	39.7899	34.87	0.792582	-0.335368	#N/A	#N/A	#N/A	#N/A	#N/A	#N/A	#N/A	#N/A	#N/A	#N/A	#N/A	#N/A	#N/A		UGT2B17				NDUFV3	GPR162			FAM170A
sp|P54727|RD23B_HUMAN	RAD23B	RD23B_HUMAN UV excision repair protein RAD23 homolog B	16	3460.1	3428.27	3444.18	2304.97	2408.71	2356.84	0.684295	-0.547309	2907.96	3182.01	3044.99	0.884094	-0.177728	2876.05	2553.72	2714.89	0.788252	-0.343272	2734.44	2988.93	2861.68	0.830874	-0.267298	#N/A	#N/A	#N/A	#N/A	#N/A	#N/A	#N/A	#N/A	#N/A	#N/A	#N/A	#N/A	#N/A		UGT2B28				NLN	GPR17			FAM192A
sp|Q8IWZ3-6|ANKH1_HUMAN	ANKHD1	ANKH1_HUMAN Isoform 6 of Ankyrin repeat and KH domain-containing protein 1	23	3568.62	3371.81	3470.22	2269.75	2481.31	2375.53	0.684548	-0.546776	3004.19	3138.82	3071.51	0.885105	-0.176079	2901.39	2805.78	2853.59	0.822308	-0.28225	2357.14	3492.73	2924.93	0.842869	-0.24662	#N/A	#N/A	#N/A	#N/A	#N/A	#N/A	#N/A	#N/A	#N/A	ANKHD1	#N/A	#N/A	#N/A		UGT2B4				NLRX1	GPR171			FAM220A
sp|Q96BI3|APH1A_HUMAN	APH1A	APH1A_HUMAN Gamma-secretase subunit APH-1A	3	1128.35	1296.46	1212.4	900.704	762.509	831.606	0.685915	-0.543899	1110.4	741.64	926.02	0.763788	-0.388756	841.699	899.235	870.467	0.717967	-0.47801	872.677	909.586	891.131	0.735011	-0.444161	#N/A	#N/A	#N/A	#N/A	#N/A	#N/A	#N/A	#N/A	#N/A	#N/A	#N/A	#N/A	#N/A		UGT2B7				NME4	GPR173			FAM32A
sp|O60216|RAD21_HUMAN	RAD21	RAD21_HUMAN Double-strand-break repair protein rad21 homolog	4	679.188	665.765	672.476	467.43	455.1	461.265	0.68592	-0.543888	458.933	448.963	453.948	0.675039	-0.566957	489.24	520.587	504.913	0.750827	-0.413448	463.118	619.473	541.295	0.804928	-0.313067	#N/A	#N/A	#N/A	#N/A	#N/A	#N/A	#N/A	#N/A	#N/A	#N/A	#N/A	#N/A	#N/A		UPK3A				NMNAT3	GPR174			FAM50A
sp|P15927-3|RFA2_HUMAN	RPA2	RFA2_HUMAN Isoform 3 of Replication protein A 32 kDa subunit	1	58.2083	57.6915	57.9499	42.3964	37.2917	39.844	0.68756	-0.540442	50.3555	57.8496	54.1026	0.933609	-0.0991096	44.5402	45.1025	44.8213	0.77345	-0.37062	42.2397	45.0771	43.6584	0.753382	-0.408547	#N/A	#N/A	#N/A	#N/A	#N/A	#N/A	#N/A	#N/A	RPA2	#N/A	#N/A	#N/A	#N/A		USE1				NNT	GPR176			FAM53A
sp|P61978-2|HNRPK_HUMAN	HNRNPK	HNRPK_HUMAN Isoform 2 of Heterogeneous nuclear ribonucleoprotein K	38	13282.6	12644.7	12963.7	8679.97	9164.19	8922.08	0.688238	-0.53902	10371.4	11555.9	10963.6	0.845722	-0.241744	10657	9608.91	10133	0.781644	-0.355417	9123.64	11529	10326.3	0.79656	-0.328146	#N/A	#N/A	#N/A	#N/A	#N/A	#N/A	#N/A	#N/A	#N/A	#N/A	#N/A	#N/A	#N/A		USP19				NOA1	GPR179			FAM53B
sp|Q7Z6Z7|HUWE1_HUMAN	HUWE1	HUWE1_HUMAN E3 ubiquitin-protein ligase HUWE1	14	1656.71	2137.58	1897.14	1314.46	1298.08	1306.27	0.688545	-0.538377	1483.41	1441.51	1462.46	0.770874	-0.375433	1401.8	1443.07	1422.43	0.749777	-0.415467	1298.8	3165.05	2231.93	1.17647	0.234459	#N/A	#N/A	#N/A	#N/A	#N/A	#N/A	#N/A	#N/A	#N/A	#N/A	#N/A	#N/A	#N/A		VAPB				NSUN3	GPR182			FAM71B
sp|Q9NTZ6|RBM12_HUMAN	RBM12	RBM12_HUMAN RNA-binding protein 12	17	4389.88	4528.07	4458.98	2997.03	3148.15	3072.59	0.68908	-0.537257	3675.03	3793.22	3734.12	0.83744	-0.255942	3806.25	3382.48	3594.36	0.806097	-0.310975	2857.64	3718.33	3287.98	0.737386	-0.439508	#N/A	#N/A	#N/A	#N/A	#N/A	#N/A	#N/A	#N/A	RBM12	#N/A	#N/A	#N/A	#N/A		VKORC1				NSUN4	GPR183			FAM76B
sp|P20810-6|ICAL_HUMAN	CAST	ICAL_HUMAN Isoform 6 of Calpastatin	9	1461.29	1199.27	1330.28	902.301	932.113	917.207	0.689484	-0.536411	972.534	1161.33	1066.93	0.802036	-0.318262	1132.05	978.483	1055.27	0.793266	-0.334123	902.292	1113.85	1008.07	0.757789	-0.400133	#N/A	#N/A	#N/A	#N/A	#N/A	#N/A	#N/A	#N/A	#N/A	#N/A	#N/A	#N/A	#N/A		VKORC1L1				NT5M	GPR19			FAM9A
sp|Q92504|S39A7_HUMAN	SLC39A7	S39A7_HUMAN Zinc transporter SLC39A7	2	323.136	427.336	375.236	279.711	238.121	258.916	0.690008	-0.535314	259.109	291.526	275.317	0.733718	-0.446702	310.483	243.382	276.933	0.738022	-0.438264	300.928	564.25	432.589	1.15285	0.205199	#N/A	#N/A	#N/A	#N/A	#N/A	#N/A	#N/A	#N/A	#N/A	#N/A	#N/A	#N/A	#N/A		WFS1				NUBPL	GPR20			FAM9B
sp|P08697|A2AP_HUMAN	SERPINF2	A2AP_HUMAN Alpha-2-antiplasmin	1	403.67	484.213	443.942	269.827	343.28	306.553	0.690527	-0.534231	403.648	257.528	330.588	0.744666	-0.425335	401.199	437.755	419.477	0.944893	-0.0817779	399.333	617.428	508.38	1.14515	0.195539	#N/A	#N/A	#N/A	#N/A	#N/A	#N/A	#N/A	#N/A	#N/A	#N/A	#N/A	#N/A	#N/A		WRB				NUDT9	GPR21			FAM9C
sp|P45974|UBP5_HUMAN	USP5	UBP5_HUMAN Ubiquitin carboxyl-terminal hydrolase 5	6	1523.94	1668.56	1596.25	1093.24	1113.34	1103.29	0.691176	-0.532875	1346.91	1317.34	1332.12	0.834534	-0.260957	1383.61	1233.88	1308.74	0.819887	-0.286503	1114.78	1547.2	1330.99	0.833823	-0.262187	#N/A	#N/A	#N/A	#N/A	#N/A	#N/A	#N/A	#N/A	#N/A	#N/A	#N/A	#N/A	#N/A		XXYLT1				OAT	GPR22			FAN1
sp|Q9Y6F6-7|MRVI1_HUMAN	MRVI1	MRVI1_HUMAN Isoform 7 of Protein MRVI1	1	260.802	381.546	321.174	219.065	225.073	222.069	0.691429	-0.532347	309.273	232.522	270.898	0.84346	-0.245608	309.806	334.957	322.381	1.00376	0.00541385	312.6	281.981	297.291	0.925637	-0.111482	#N/A	#N/A	#N/A	#N/A	#N/A	#N/A	#N/A	#N/A	#N/A	#N/A	#N/A	#N/A	#N/A		ZDHHC16				OGDHL	GPR25			FANCB
sp|Q9Y5B0|CTDP1_HUMAN	CTDP1	CTDP1_HUMAN RNA polymerase II subunit A C-terminal domain phosphatase	1	142.299	150.092	146.196	102.08	100.555	101.317	0.693027	-0.529016	104.293	111.294	107.793	0.737324	-0.439629	130.804	125.622	128.213	0.876997	-0.189356	109.022	121.887	115.454	0.789727	-0.340574	#N/A	#N/A	#N/A	#N/A	#N/A	#N/A	#N/A	#N/A	#N/A	#N/A	#N/A	#N/A	#N/A		ZDHHC4				OMA1	GPR26			FANCE
sp|Q15417|CNN3_HUMAN	CNN3	CNN3_HUMAN Calponin-3	10	2411.17	2432.1	2421.64	1721.24	1636.71	1678.97	0.693323	-0.528401	1949.07	1921.44	1935.26	0.799152	-0.323458	2028.21	1817.03	1922.62	0.793935	-0.332908	1628.09	1948.87	1788.48	0.738542	-0.437247	#N/A	#N/A	#N/A	#N/A	#N/A	#N/A	#N/A	#N/A	#N/A	#N/A	#N/A	#N/A	#N/A		ZDHHC6				OPA1	GPR27			FANCF
sp|O95232|LC7L3_HUMAN	LUC7L3	LC7L3_HUMAN Luc7-like protein 3	8	1225.15	1356.19	1290.67	817.151	973.407	895.279	0.693654	-0.527711	984.315	1133.84	1059.08	0.820564	-0.285312	1009.66	923.137	966.399	0.748757	-0.41743	931.689	1153.05	1042.37	0.807619	-0.308253	#N/A	#N/A	#N/A	#N/A	#N/A	#N/A	#N/A	#N/A	LUC7L3	#N/A	#N/A	#N/A	#N/A		ZFAND2B				OPA3	GPR3			FANCI
sp|Q7Z3B4|NUP54_HUMAN	NUP54	NUP54_HUMAN Nucleoporin p54	10	1643.44	1816.97	1730.2	1169.91	1232.64	1201.28	0.694296	-0.526377	1359.84	1463.29	1411.57	0.815837	-0.293647	1339.3	1308.72	1324.01	0.765233	-0.386029	1180.29	1806.02	1493.15	0.862993	-0.212579	#N/A	#N/A	#N/A	#N/A	#N/A	#N/A	#N/A	#N/A	#N/A	#N/A	#N/A	#N/A	#N/A		ZNRF4				OSGEPL1	GPR31			FANCM
sp|O95163|ELP1_HUMAN	IKBKAP	ELP1_HUMAN Elongator complex protein 1	1	34.1426	45.424	39.7833	30.6396	24.6502	27.6449	0.694887	-0.52515	37.1041	31.5467	34.3254	0.862809	-0.212886	38.6871	39.1257	38.9064	0.977958	-0.0321555	26.2944	40.4529	33.3736	0.838886	-0.253453	#N/A	#N/A	#N/A	#N/A	#N/A	#N/A	#N/A	#N/A	#N/A	#N/A	#N/A	#N/A	#N/A						OTC	GPR32			FBH1
sp|Q15054|DPOD3_HUMAN	POLD3	DPOD3_HUMAN DNA polymerase delta subunit 3	1	24.6399	22.0662	23.353	13.3516	19.1409	16.2462	0.69568	-0.523504	17.2449	16.7977	17.0213	0.728868	-0.45627	18.7906	18.0654	18.428	0.789105	-0.341711	13.4152	23.4428	18.429	0.789147	-0.341633	#N/A	#N/A	#N/A	#N/A	#N/A	#N/A	#N/A	#N/A	#N/A	#N/A	#N/A	#N/A	#N/A						OXA1L	GPR32P1			FBL
sp|Q92843-2|B2CL2_HUMAN	BCL2L2	B2CL2_HUMAN Isoform 3 of Bcl-2-like protein 2	1	86.0605	75.5893	80.8249	52.6874	59.7779	56.2326	0.695734	-0.523392	69.2032	78.0082	73.6057	0.910681	-0.134982	64.1445	65.9486	65.0465	0.804784	-0.313327	68.2092	64.9189	66.564	0.823559	-0.280057	#N/A	#N/A	#N/A	#N/A	#N/A	#N/A	#N/A	#N/A	#N/A	#N/A	#N/A	#N/A	#N/A						OXCT1	GPR33			FBLL1
sp|Q9UDY4|DNJB4_HUMAN	DNAJB4	DNJB4_HUMAN DnaJ homolog subfamily B member 4	12	4110.28	3662.9	3886.59	2616.36	2792.73	2704.55	0.695866	-0.523119	3698.53	3348.6	3523.57	0.906595	-0.141469	3202.12	2930.97	3066.55	0.789007	-0.341891	2800.25	2927.05	2863.65	0.736803	-0.44065	#N/A	#N/A	#N/A	#N/A	#N/A	#N/A	#N/A	#N/A	#N/A	#N/A	#N/A	#N/A	#N/A						OXCT2	GPR34			FBXO11
sp|Q9HCN3|TMM8A_HUMAN	TMEM8A	TMM8A_HUMAN Transmembrane protein 8A	2	144.46	211.946	178.203	124.906	123.578	124.242	0.697194	-0.520369	135.245	118.065	126.655	0.710734	-0.492618	131.88	144.767	138.323	0.776213	-0.365475	129.626	174.447	152.036	0.853165	-0.229104	#N/A	#N/A	#N/A	#N/A	#N/A	#N/A	#N/A	#N/A	#N/A	#N/A	#N/A	#N/A	#N/A						OXR1	GPR37L1			FBXO25
sp|Q8NBT2|SPC24_HUMAN	SPC24	SPC24_HUMAN Kinetochore protein Spc24	2	44.7544	41.4869	43.1206	31.3713	28.7819	30.0766	0.697499	-0.519737	50.7004	50.5321	50.6163	1.17383	0.231222	40.3549	38.2831	39.319	0.911837	-0.133152	31.2477	25.676	28.4618	0.660052	-0.599349	#N/A	#N/A	#N/A	#N/A	#N/A	#N/A	#N/A	#N/A	SPC24	#N/A	#N/A	#N/A	#N/A						OXSM	GPR39			FBXO3
sp|P18858|DNLI1_HUMAN	LIG1	DNLI1_HUMAN DNA ligase 1	2	110.815	141.8	126.308	87.1661	89.3301	88.2481	0.698677	-0.517303	107.343	102.941	105.142	0.832429	-0.264601	103.789	103.929	103.859	0.822271	-0.282314	94.6041	108.442	101.523	0.803777	-0.315133	#N/A	#N/A	#N/A	#N/A	#N/A	#N/A	#N/A	#N/A	LIG1	#N/A	#N/A	#N/A	#N/A						PABPC5	GPR4			FCF1
sp|Q9Y251|HPSE_HUMAN	HPSE	HPSE_HUMAN Heparanase	5	1360.6	1406.25	1383.42	992.893	940.495	966.694	0.698769	-0.517113	1089.74	1011.19	1050.47	0.759322	-0.397216	1143.12	1293.43	1218.28	0.880622	-0.183405	1308.34	1427.92	1368.13	0.988944	-0.0160391	#N/A	#N/A	#N/A	#N/A	#N/A	#N/A	#N/A	#N/A	#N/A	#N/A	#N/A	#N/A	#N/A						PAM16	GPR42			FERD3L
sp|P22234-2|PUR6_HUMAN	PAICS	PUR6_HUMAN Isoform 2 of Multifunctional protein ADE2	19	3355.34	3397.7	3376.52	2314.28	2409.3	2361.79	0.699475	-0.515656	2926.72	2907.87	2917.3	0.863995	-0.210906	2778.24	2638.52	2708.38	0.802122	-0.318107	2342.24	2711.11	2526.68	0.748307	-0.418297	#N/A	#N/A	#N/A	#N/A	#N/A	#N/A	#N/A	#N/A	#N/A	#N/A	#N/A	#N/A	#N/A						PARL	GPR45			FEV
sp|P17275|JUNB_HUMAN	JUNB	JUNB_HUMAN Transcription factor jun-B	4	268.073	265.438	266.755	171.844	201.689	186.767	0.700141	-0.514282	197.22	206.647	201.933	0.756998	-0.401638	207.004	197.521	202.262	0.758232	-0.399289	212.993	259.169	236.081	0.885009	-0.176236	#N/A	#N/A	#N/A	#N/A	#N/A	#N/A	#N/A	#N/A	JUNB	#N/A	#N/A	#N/A	#N/A						PARS2	GPR50			FEZF1
sp|P52597|HNRPF_HUMAN	HNRNPF	HNRPF_HUMAN Heterogeneous nuclear ribonucleoprotein F	20	5586.36	5736.69	5661.52	3798.05	4139.63	3968.84	0.70102	-0.512473	4303.29	4823.02	4563.16	0.805994	-0.311159	4419.34	3881.85	4150.6	0.733123	-0.447873	4073.74	5024.94	4549.34	0.803554	-0.315533	#N/A	#N/A	#N/A	#N/A	#N/A	#N/A	#N/A	#N/A	HNRNPF	#N/A	#N/A	#N/A	#N/A						PC	GPR52			FEZF2
sp|P00441|SODC_HUMAN	SOD1	SODC_HUMAN Superoxide dismutase [Cu-Zn]	9	5679.66	6286.9	5983.28	4190.9	4214.05	4202.48	0.70237	-0.509697	4469.52	4365.38	4417.45	0.738299	-0.437723	5329.98	5022.11	5176.05	0.865085	-0.209086	4867.42	8119	6493.21	1.08523	0.117995	#N/A	#N/A	#N/A	#N/A	#N/A	#N/A	#N/A	#N/A	#N/A	#N/A	#N/A	#N/A	#N/A						PCCA	GPR55			FGF12
sp|Q8IUC4|RHPN2_HUMAN	RHPN2	RHPN2_HUMAN Rhophilin-2	2	119.505	106.603	113.054	74.4051	84.6366	79.5208	0.703388	-0.507607	96.8786	81.4069	89.1428	0.788497	-0.342823	92.2282	82.076	87.1521	0.770889	-0.375405	95.2406	92.8934	94.067	0.832054	-0.265251	#N/A	#N/A	#N/A	#N/A	#N/A	#N/A	#N/A	#N/A	#N/A	#N/A	#N/A	#N/A	#N/A						PCCB	GPR6			FGF14
sp|Q9NXN4|GDAP2_HUMAN	GDAP2	GDAP2_HUMAN Ganglioside-induced differentiation-associated protein 2	8	2793.46	2998.49	2895.97	2101.92	1976.59	2039.26	0.704169	-0.506007	2503.58	1999.98	2251.78	0.777555	-0.362983	2122.28	2279.35	2200.82	0.759956	-0.396011	1907.96	2146.65	2027.31	0.700042	-0.514486	#N/A	#N/A	#N/A	#N/A	#N/A	#N/A	#N/A	#N/A	#N/A	#N/A	#N/A	#N/A	#N/A						PCK2	GPR63			FHL5
sp|Q9Y263|PLAP_HUMAN	PLAA	PLAP_HUMAN Phospholipase A-2-activating protein	4	1193.42	1282.09	1237.76	876.511	868.468	872.489	0.704897	-0.504516	1029.63	985.84	1007.74	0.814164	-0.296609	1011.3	904.132	957.716	0.773752	-0.370056	837.996	1163.22	1000.61	0.808406	-0.306849	#N/A	#N/A	#N/A	#N/A	#N/A	#N/A	#N/A	#N/A	#N/A	#N/A	#N/A	#N/A	#N/A						PDE12	GPR65			FIGLA
sp|Q9NP74|PALMD_HUMAN	PALMD	PALMD_HUMAN Palmdelphin	1	53.7678	54.0905	53.9291	37.4044	38.636	38.0202	0.705003	-0.504299	40.7734	49.7266	45.25	0.839064	-0.253148	42.4808	35.182	38.8314	0.720045	-0.473842	36.5668	50.597	43.5819	0.808133	-0.307336	#N/A	#N/A	#N/A	#N/A	#N/A	#N/A	#N/A	#N/A	#N/A	#N/A	#N/A	#N/A	#N/A						PDF	GPR68			FIP1L1
sp|Q15434|RBMS2_HUMAN	RBMS2	RBMS2_HUMAN RNA-binding motif, single-stranded-interacting protein 2	2	102.54	99.3144	100.927	67.2959	75.0706	71.1833	0.705293	-0.503705	78.2439	77.7174	77.9806	0.772643	-0.372127	76.8024	69.4974	73.1499	0.724779	-0.464387	64.596	80.2292	72.4126	0.717474	-0.479002	#N/A	#N/A	#N/A	#N/A	#N/A	#N/A	#N/A	#N/A	RBMS2	#N/A	#N/A	#N/A	#N/A						PDHA1	GPR75			FKBP3
sp|Q9BZ95|NSD3_HUMAN	WHSC1L1	NSD3_HUMAN Histone-lysine N-methyltransferase NSD3	1	54.1776	58.7402	56.4589	36.1371	43.5679	39.8525	0.705867	-0.502531	45.776	50.1997	47.9879	0.849961	-0.234532	48.1566	36.352	42.2543	0.748408	-0.418103	33.9315	45.6953	39.8134	0.705175	-0.503947	#N/A	#N/A	#N/A	#N/A	#N/A	#N/A	#N/A	#N/A	#N/A	#N/A	#N/A	#N/A	#N/A						PDHA2	GPR78			FLI1
sp|Q8NFA0|UBP32_HUMAN	USP32	UBP32_HUMAN Ubiquitin carboxyl-terminal hydrolase 32	2	567.116	655.222	611.169	470.437	392.904	431.671	0.706303	-0.501641	556.555	441.286	498.92	0.816338	-0.292761	514.662	549.096	531.879	0.870265	-0.200473	425.725	593.621	509.673	0.833931	-0.261999	#N/A	#N/A	USP32	#N/A	#N/A	#N/A	#N/A	#N/A	#N/A	#N/A	#N/A	#N/A	#N/A						PDHB	GPR82			FLYWCH1
sp|P49005|DPOD2_HUMAN	POLD2	DPOD2_HUMAN DNA polymerase delta subunit 2	3	264.815	221.21	243.012	167.998	175.599	171.798	0.706953	-0.500313	199.907	198.609	199.258	0.81995	-0.286393	189.081	218.698	203.889	0.839008	-0.253243	154.677	198.532	176.605	0.72673	-0.460508	#N/A	#N/A	#N/A	#N/A	#N/A	#N/A	#N/A	#N/A	POLD2	#N/A	#N/A	#N/A	#N/A						PDHX	GPR83			FOSB
sp|Q9BPU6|DPYL5_HUMAN	DPYSL5	DPYL5_HUMAN Dihydropyrimidinase-related protein 5	1	181.852	176.724	179.288	142.327	111.193	126.76	0.707019	-0.500179	137.945	128.512	133.228	0.743098	-0.428376	100.853	65.9271	83.3901	0.465118	-1.10433	79.0829	90.1605	84.6217	0.471988	-1.08318	#N/A	#N/A	#N/A	#N/A	#N/A	#N/A	#N/A	#N/A	#N/A	DPYSL5	#N/A	#N/A	#N/A						PDK1	GPR84			FOSL1
sp|Q7Z739|YTHD3_HUMAN	YTHDF3	YTHD3_HUMAN YTH domain family protein 3	17	4523.58	4266.81	4395.19	2879.36	3338.15	3108.76	0.707308	-0.49959	3579.52	3894.91	3737.22	0.850296	-0.233964	3166.67	3101.56	3134.11	0.713078	-0.487869	2743.54	3596.04	3169.79	0.721194	-0.47154	#N/A	#N/A	#N/A	#N/A	#N/A	#N/A	#N/A	#N/A	#N/A	YTHDF3	#N/A	#N/A	#N/A						PDK2	GPR87			FOSL2
sp|Q8IYB5|SMAP1_HUMAN	SMAP1	SMAP1_HUMAN Stromal membrane-associated protein 1	1	62.9761	47.5552	55.2657	41.0932	37.0985	39.0958	0.707417	-0.499368	43.7418	51.3275	47.5346	0.860112	-0.217404	39.4718	30.5729	35.0224	0.633709	-0.658107	39.7309	43.2016	41.4663	0.750308	-0.414445	#N/A	#N/A	#N/A	#N/A	#N/A	#N/A	#N/A	#N/A	#N/A	#N/A	#N/A	#N/A	#N/A						PDK3	GPRC5D			FOXA1
sp|Q9NR12|PDLI7_HUMAN	PDLIM7	PDLI7_HUMAN PDZ and LIM domain protein 7	7	2510.56	2546.66	2528.61	1709.3	1869.93	1789.62	0.707747	-0.498695	1933.61	2062.87	1998.24	0.790252	-0.339615	1895.09	1718.23	1806.66	0.714487	-0.48502	1610.52	1884.66	1747.59	0.691127	-0.532978	#N/A	#N/A	#N/A	#N/A	#N/A	#N/A	#N/A	#N/A	#N/A	#N/A	#N/A	#N/A	#N/A						PDK4	GPRC6A			FOXA3
sp|O75925|PIAS1_HUMAN	PIAS1	PIAS1_HUMAN E3 SUMO-protein ligase PIAS1	7	884.525	867.24	875.882	599.586	640.458	620.022	0.707883	-0.498418	698.802	745.936	722.369	0.824733	-0.278001	727.884	666.069	696.976	0.795742	-0.329627	480.333	761.659	620.996	0.708995	-0.496153	#N/A	#N/A	#N/A	#N/A	#N/A	#N/A	#N/A	#N/A	PIAS1	#N/A	#N/A	#N/A	#N/A						PDP1	GPRIN1			FOXB1
sp|Q96RS6|NUDC1_HUMAN	NUDCD1	NUDC1_HUMAN NudC domain-containing protein 1	2	68.6814	86.7156	77.6985	56.165	53.9318	55.0484	0.708487	-0.497186	56.4972	49.1815	52.8393	0.680056	-0.556274	57.6655	63.2533	60.4594	0.778128	-0.36192	45.5887	82.2129	63.9008	0.82242	-0.282053	#N/A	#N/A	#N/A	#N/A	#N/A	#N/A	#N/A	#N/A	#N/A	#N/A	#N/A	#N/A	#N/A						PDP2	GRIA3			FOXB2
sp|P35658-5|NU214_HUMAN	NUP214	NU214_HUMAN Isoform 5 of Nuclear pore complex protein Nup214	11	1865.79	1728.15	1796.97	1231.7	1316.79	1274.24	0.709108	-0.495924	1511.04	1571.82	1541.43	0.857794	-0.221297	1473.9	1357	1415.45	0.787687	-0.344306	1378.95	1395.31	1387.13	0.771927	-0.373463	#N/A	#N/A	#N/A	#N/A	#N/A	#N/A	#N/A	#N/A	#N/A	#N/A	#N/A	#N/A	#N/A						PDPR	GRIA4			FOXC1
sp|Q16666|IF16_HUMAN	IFI16	IF16_HUMAN Gamma-interferon-inducible protein 16	5	1054.83	967.907	1011.37	673.798	761.074	717.436	0.709372	-0.495387	739.945	784.696	762.321	0.753751	-0.407839	786.635	660.131	723.383	0.715252	-0.483477	592.528	835.96	714.244	0.706215	-0.50182	#N/A	#N/A	#N/A	#N/A	#N/A	#N/A	#N/A	#N/A	#N/A	#N/A	#N/A	#N/A	#N/A						PDSS1	GRID1			FOXC2
sp|Q9Y2Z0|SUGT1_HUMAN	SUGT1	SUGT1_HUMAN Suppressor of G2 allele of SKP1 homolog	5	728.636	771.615	750.125	525.3	539.156	532.228	0.709519	-0.495088	667.736	637.132	652.434	0.869766	-0.2013	656.341	565.104	610.723	0.81416	-0.296615	554.158	684.283	619.221	0.825489	-0.276679	#N/A	#N/A	#N/A	#N/A	#N/A	#N/A	#N/A	#N/A	#N/A	#N/A	#N/A	#N/A	#N/A						PDSS2	GRID2			FOXD1
sp|P17844|DDX5_HUMAN	DDX5	DDX5_HUMAN Probable ATP-dependent RNA helicase DDX5	21	4687.94	4330.11	4509.02	3060.87	3338.97	3199.92	0.70967	-0.49478	3245.81	3853.07	3549.44	0.787186	-0.345224	3552.5	3504.77	3528.64	0.782572	-0.353705	3669.83	3440.24	3555.03	0.788427	-0.342952	#N/A	#N/A	#N/A	#N/A	#N/A	#N/A	#N/A	#N/A	DDX5	#N/A	#N/A	#N/A	#N/A						PET100	GRID2IP			FOXD2
sp|Q05519|SRS11_HUMAN	SRSF11	SRS11_HUMAN Serine/arginine-rich splicing factor 11	4	574.623	629.425	602.024	398.016	456.952	427.484	0.710078	-0.493951	467.361	689.982	578.671	0.96121	-0.0570764	475.553	434.326	454.94	0.755683	-0.404146	461.05	538.084	499.567	0.829812	-0.269143	#N/A	#N/A	#N/A	#N/A	#N/A	#N/A	#N/A	#N/A	SRSF11	#N/A	#N/A	#N/A	#N/A						PET117	GRIK1			FOXD3
sp|Q7L014|DDX46_HUMAN	DDX46	DDX46_HUMAN Probable ATP-dependent RNA helicase DDX46	18	1849.29	1993.74	1921.51	1270.5	1461.14	1365.82	0.710804	-0.492477	1598.7	1934.94	1766.82	0.919493	-0.121089	1596.91	1517.21	1557.06	0.810329	-0.30342	1454.44	1594.2	1524.32	0.793291	-0.334078	#N/A	#N/A	#N/A	#N/A	#N/A	#N/A	#N/A	#N/A	DDX46	#N/A	#N/A	#N/A	#N/A						PGS1	GRIK2			FOXD4
sp|Q15942|ZYX_HUMAN	ZYX	ZYX_HUMAN Zyxin	8	2028.83	1691.82	1860.32	1297.13	1349.92	1323.53	0.711448	-0.491169	1646.11	1604.47	1625.29	0.873659	-0.194858	1646.29	1469.96	1558.12	0.837555	-0.255744	1277.21	1152.86	1215.03	0.653131	-0.614557	#N/A	#N/A	#N/A	#N/A	#N/A	#N/A	#N/A	#N/A	#N/A	#N/A	#N/A	#N/A	#N/A						PHYKPL	GRIK3			FOXD4L1
sp|Q9NS93|TM7S3_HUMAN	TM7SF3	TM7S3_HUMAN Transmembrane 7 superfamily member 3	10	4011.32	4444.62	4227.97	2963.24	3053.07	3008.15	0.711489	-0.491086	3278.16	2909.53	3093.85	0.731757	-0.450564	3374.69	3623.16	3498.93	0.827566	-0.273053	3195.17	4656.67	3925.92	0.928559	-0.106934	#N/A	#N/A	#N/A	#N/A	#N/A	TM7SF3	#N/A	#N/A	#N/A	#N/A	#N/A	#N/A	#N/A						PISD	GRIK4			FOXD4L3
sp|Q9Y5A9|YTHD2_HUMAN	YTHDF2	YTHD2_HUMAN YTH domain family protein 2	13	3577	3388.49	3482.74	2465.98	2490.5	2478.24	0.711577	-0.490909	2705.25	2971.9	2838.57	0.81504	-0.295058	2496.16	2232.02	2364.09	0.678801	-0.55894	2038.89	2840.81	2439.85	0.700554	-0.513432	#N/A	#N/A	#N/A	#N/A	#N/A	#N/A	#N/A	#N/A	#N/A	#N/A	#N/A	#N/A	#N/A						PITRM1	GRIK5			FOXD4L4
sp|Q9P2N7-5|KLH13_HUMAN	KLHL13	KLH13_HUMAN Isoform 5 of Kelch-like protein 13	6	806.303	829.198	817.75	595.149	568.987	582.068	0.711792	-0.490473	683.652	603.419	643.535	0.786958	-0.345641	652.689	803.838	728.264	0.890569	-0.1672	552.631	651.905	602.268	0.736494	-0.441255	#N/A	#N/A	#N/A	#N/A	#N/A	#N/A	#N/A	#N/A	#N/A	#N/A	#N/A	#N/A	#N/A						PLD6	GRIN1			FOXD4L5
sp|Q9NW75|GPTC2_HUMAN	GPATCH2	GPTC2_HUMAN G patch domain-containing protein 2	1	34.6636	28.9479	31.8058	22.4641	22.8941	22.6791	0.71305	-0.487924	31.6167	39.6024	35.6095	1.11959	0.162977	28.6739	26.9935	27.8337	0.875115	-0.192455	28.0441	37.9148	32.9794	1.0369	0.0522797	#N/A	#N/A	#N/A	#N/A	#N/A	#N/A	#N/A	#N/A	GPATCH2	#N/A	#N/A	#N/A	#N/A						PLSCR3	GRIN2B			FOXD4L6
sp|Q13435|SF3B2_HUMAN	SF3B2	SF3B2_HUMAN Splicing factor 3B subunit 2	9	1151.24	1182.26	1166.75	815.296	849.875	832.586	0.713594	-0.486825	907.419	1094.14	1000.78	0.85775	-0.221371	979.104	903.419	941.262	0.806738	-0.309828	943.592	1087.15	1015.37	0.870256	-0.200489	#N/A	#N/A	#N/A	#N/A	#N/A	#N/A	#N/A	#N/A	SF3B2	#N/A	#N/A	#N/A	#N/A						PMAIP1	GRIN2C			FOXE1
sp|Q8WTV0|SCRB1_HUMAN	SCARB1	SCRB1_HUMAN Scavenger receptor class B member 1	15	3488.52	3717.07	3602.8	2584.7	2557.72	2571.21	0.713671	-0.486669	3027.8	2517.25	2772.53	0.769548	-0.377916	2931.13	3250.62	3090.88	0.85791	-0.221101	2756.1	4090.06	3423.08	0.950118	-0.0738216	#N/A	#N/A	#N/A	#N/A	#N/A	SCARB1	#N/A	#N/A	#N/A	#N/A	#N/A	#N/A	#N/A						PMPCA	GRIN2D			FOXE3
sp|Q99439|CNN2_HUMAN	CNN2	CNN2_HUMAN Calponin-2	7	2116.22	2022.32	2069.27	1466.37	1487.49	1476.93	0.713744	-0.48652	1949.01	1855.46	1902.24	0.919278	-0.121426	1840.25	1705.68	1772.97	0.856807	-0.222958	1360.2	1626.9	1493.55	0.721776	-0.470376	#N/A	#N/A	#N/A	#N/A	#N/A	#N/A	#N/A	#N/A	#N/A	#N/A	#N/A	#N/A	#N/A						PMPCB	GRIN3A			FOXF1
sp|Q7L2J0|MEPCE_HUMAN	MEPCE	MEPCE_HUMAN 7SK snRNA methylphosphate capping enzyme	1	191.123	191.624	191.373	135.161	138.176	136.668	0.714145	-0.48571	155.826	175.58	165.703	0.865862	-0.207791	180.312	149.804	165.058	0.862491	-0.213418	158.517	181.468	169.993	0.888276	-0.17092	#N/A	#N/A	#N/A	#N/A	#N/A	#N/A	#N/A	#N/A	#N/A	#N/A	#N/A	#N/A	#N/A						PNPLA4	GRIN3B			FOXF2
sp|Q14192|FHL2_HUMAN	FHL2	FHL2_HUMAN Four and a half LIM domains protein 2	1	184.027	170.419	177.223	131.283	121.915	126.599	0.714349	-0.4853	141.069	145.076	143.072	0.807302	-0.308819	147.19	151.99	149.59	0.844078	-0.244552	134.832	136.024	135.428	0.764167	-0.38804	#N/A	#N/A	#N/A	#N/A	#N/A	#N/A	#N/A	#N/A	#N/A	#N/A	#N/A	#N/A	#N/A						PNPT1	GRM1			FOXG1
sp|O14776|TCRG1_HUMAN	TCERG1	TCRG1_HUMAN Transcription elongation regulator 1	7	1097.66	1076.74	1087.2	758.94	795.764	777.352	0.715004	-0.483977	835.511	898.449	866.98	0.797443	-0.326547	947.887	861.261	904.574	0.832022	-0.265307	788.387	859.463	823.925	0.757841	-0.400032	#N/A	#N/A	#N/A	#N/A	#N/A	#N/A	#N/A	#N/A	TCERG1	#N/A	#N/A	#N/A	#N/A						POLG	GRM2			FOXH1
tr|F6UT28|F6UT28_HUMAN	GNB1	F6UT28_HUMAN Guanine nucleotide-binding protein G(I)/G(S)/G(T) subunit beta-1 (Fragment)	1	95.9523	111.967	103.96	69.6977	78.999	74.3483	0.715165	-0.483651	87.517	80.4576	83.9873	0.807884	-0.307781	78.7193	89.1922	83.9557	0.80758	-0.308323	74.1929	117.687	95.9399	0.922858	-0.11582	#N/A	#N/A	#N/A	#N/A	#N/A	#N/A	#N/A	#N/A	#N/A	#N/A	#N/A	#N/A	#N/A						POLG2	GRM3			FOXI1
sp|Q12857-4|NFIA_HUMAN	NFIA	NFIA_HUMAN Isoform 4 of Nuclear factor 1 A-type	4	220.321	226.136	223.228	152.549	166.858	159.704	0.715426	-0.483125	167.156	194.563	180.859	0.810199	-0.303652	205.596	179.474	192.535	0.862502	-0.213401	176.489	215.789	196.139	0.878647	-0.186645	#N/A	#N/A	#N/A	#N/A	#N/A	#N/A	#N/A	#N/A	NFIA	#N/A	#N/A	#N/A	#N/A						POLRMT	GRM4			FOXI2
sp|O15212|PFD6_HUMAN	PFDN6	PFD6_HUMAN Prefoldin subunit 6	7	2174.66	2031.38	2103.02	1460.47	1550.16	1505.32	0.715787	-0.482397	1885.26	1784.61	1834.93	0.872524	-0.196734	1774.62	1592.58	1683.6	0.800563	-0.320913	1596.59	1484.07	1540.33	0.732437	-0.449223	#N/A	#N/A	#N/A	#N/A	#N/A	#N/A	#N/A	#N/A	#N/A	#N/A	#N/A	#N/A	#N/A						PPA2	GRM5			FOXI3
sp|Q8IV08|PLD3_HUMAN	PLD3	PLD3_HUMAN Phospholipase D3	32	10352.4	11182.1	10767.2	7560.64	7865.94	7713.29	0.716366	-0.481232	8233.47	7087.32	7660.39	0.711453	-0.491159	8729.33	9469.18	9099.26	0.845086	-0.242829	8029.82	10576	9302.91	0.864001	-0.210896	#N/A	#N/A	#N/A	#N/A	#N/A	#N/A	#N/A	#N/A	#N/A	#N/A	#N/A	#N/A	#N/A						PPIF	GRM7			FOXJ1
sp|P78344|IF4G2_HUMAN	EIF4G2	IF4G2_HUMAN Eukaryotic translation initiation factor 4 gamma 2	42	11456.3	10964.5	11210.4	7398.45	8680.88	8039.66	0.717161	-0.47963	9050.72	9557.77	9304.24	0.829965	-0.268877	9213.84	8787.03	9000.44	0.802865	-0.316771	8457.82	8961.8	8709.81	0.77694	-0.364125	#N/A	#N/A	#N/A	#N/A	#N/A	#N/A	#N/A	#N/A	#N/A	#N/A	#N/A	#N/A	#N/A						PPM1K	GRM8			FOXJ2
sp|Q2KHR3|QSER1_HUMAN	QSER1	QSER1_HUMAN Glutamine and serine-rich protein 1	11	835.081	827.545	831.313	575.172	618.624	596.898	0.718018	-0.477907	709.215	690.012	699.613	0.841577	-0.248834	653.607	618.565	636.086	0.765158	-0.38617	531.294	730.792	631.043	0.759092	-0.397653	#N/A	#N/A	#N/A	#N/A	#N/A	#N/A	#N/A	#N/A	#N/A	#N/A	#N/A	#N/A	#N/A						PPOX	GRPR			FOXJ3
sp|Q9H307|PININ_HUMAN	PNN	PININ_HUMAN Pinin	3	1194.17	1191.56	1192.87	817.053	896.915	856.984	0.718425	-0.477091	885.468	1026.74	956.104	0.801519	-0.319191	883.129	793.224	838.177	0.702658	-0.509105	883.703	838.083	860.893	0.721702	-0.470525	#N/A	#N/A	#N/A	#N/A	#N/A	#N/A	#N/A	#N/A	#N/A	#N/A	#N/A	#N/A	#N/A						PPTC7	GSG1L			FOXL1
sp|Q9NP58|ABCB6_HUMAN	ABCB6	ABCB6_HUMAN ATP-binding cassette sub-family B member 6, mitochondrial	48	9301.96	10310.8	9806.38	6928.29	7168.46	7048.38	0.718754	-0.47643	8014.37	6405.82	7210.09	0.735245	-0.443702	7041.66	8211.03	7626.35	0.777692	-0.362729	6725.57	10531.4	8628.49	0.879885	-0.184613	#N/A	#N/A	#N/A	#N/A	#N/A	#N/A	#N/A	#N/A	#N/A	#N/A	#N/A	#N/A	#N/A						PRELID1	GUCA1B			FOXL2
sp|Q9BW61|DDA1_HUMAN	DDA1	DDA1_HUMAN DET1- and DDB1-associated protein 1	1	232.928	267.391	250.16	167.662	192.104	179.883	0.719073	-0.475789	173.637	198.2	185.918	0.7432	-0.428178	200.742	184.787	192.764	0.770566	-0.376009	182.956	195.549	189.252	0.756527	-0.402536	#N/A	#N/A	#N/A	#N/A	#N/A	#N/A	#N/A	#N/A	#N/A	#N/A	#N/A	#N/A	#N/A						PRELID3A	GYPA			FOXM1
sp|O95628-6|CNOT4_HUMAN	CNOT4	CNOT4_HUMAN Isoform 6 of CCR4-NOT transcription complex subunit 4	5	477.287	423.828	450.558	331.372	316.702	324.037	0.719191	-0.475553	400.226	380.831	390.529	0.866767	-0.206283	363.499	311.327	337.413	0.748879	-0.417196	286.641	324.879	305.76	0.678626	-0.559312	#N/A	#N/A	#N/A	#N/A	#N/A	#N/A	#N/A	#N/A	#N/A	#N/A	#N/A	#N/A	#N/A						PRNP	GYPB			FOXN1
sp|Q6ZSJ8|CA122_HUMAN	C1orf122	CA122_HUMAN Uncharacterized protein C1orf122	1	61.3433	59.9953	60.6693	42.3816	44.888	43.6348	0.719224	-0.475487	55.8086	54.2841	55.0464	0.907318	-0.14032	52.9422	53.6212	53.2817	0.878232	-0.187327	42.184	51.9512	47.0676	0.775806	-0.366232	#N/A	#N/A	#N/A	#N/A	#N/A	#N/A	#N/A	#N/A	#N/A	#N/A	#N/A	#N/A	#N/A						PRODH	GYPC			FOXN2
sp|Q92673|SORL_HUMAN	SORL1	SORL_HUMAN Sortilin-related receptor	2	369.226	375.666	372.446	252.579	283.537	268.058	0.719723	-0.474486	319.033	291.395	305.214	0.819485	-0.28721	376.525	378.602	377.563	1.01374	0.019688	360.545	497.914	429.23	1.15246	0.204718	#N/A	#N/A	#N/A	#N/A	#N/A	#N/A	#N/A	#N/A	#N/A	#N/A	#N/A	#N/A	#N/A						PRORP	HAVCR2			FOXN3
sp|P78337|PITX1_HUMAN	PITX1	PITX1_HUMAN Pituitary homeobox 1	1	83.9572	95.8946	89.9259	62.0847	67.3611	64.7229	0.719736	-0.47446	78.5722	76.9403	77.7562	0.86467	-0.209778	72.1654	71.8609	72.0131	0.800805	-0.320476	72.076	82.6806	77.3783	0.860467	-0.216808	#N/A	#N/A	#N/A	#N/A	#N/A	#N/A	#N/A	#N/A	PITX1	#N/A	#N/A	#N/A	#N/A						PTCD1	HCAR1			FOXN4
sp|Q9UMY1|NOL7_HUMAN	NOL7	NOL7_HUMAN Nucleolar protein 7	1	13.0888	18.4269	15.7579	13.2682	9.4207	11.3445	0.719924	-0.474084	13.4798	9.44991	11.4649	0.727565	-0.458853	18.1004	13.74	15.9202	1.0103	0.0147878	18.1616	17.6228	17.8922	1.13545	0.18326	#N/A	#N/A	#N/A	#N/A	#N/A	#N/A	#N/A	#N/A	NOL7	#N/A	#N/A	#N/A	#N/A						PTCD2	HCAR2			FOXP1
sp|P47974|TISD_HUMAN	ZFP36L2	TISD_HUMAN Zinc finger protein 36, C3H1 type-like 2	1	118.979	89.2052	104.092	76.7337	73.1757	74.9547	0.720081	-0.47377	94.3838	91.7333	93.0585	0.894002	-0.16165	100.891	96.5939	98.7425	0.948607	-0.0761182	82.0943	74.9658	78.5301	0.754429	-0.406544	#N/A	#N/A	#N/A	#N/A	#N/A	#N/A	#N/A	#N/A	#N/A	#N/A	#N/A	#N/A	#N/A						PTCD3	HCAR3			FOXP2
sp|Q86X55|CARM1_HUMAN	CARM1	CARM1_HUMAN Histone-arginine methyltransferase CARM1	3	430.214	495.293	462.754	352.371	314.757	333.564	0.720824	-0.47228	385.066	391.694	388.38	0.839281	-0.252775	420.312	380.656	400.484	0.865437	-0.208499	305.877	418.205	362.041	0.782363	-0.354091	#N/A	#N/A	#N/A	#N/A	#N/A	#N/A	#N/A	#N/A	#N/A	#N/A	#N/A	#N/A	#N/A						PTPMT1	HCN1			FOXP4
sp|Q14694-2|UBP10_HUMAN	USP10	UBP10_HUMAN Isoform 2 of Ubiquitin carboxyl-terminal hydrolase 10	1	111.375	104.971	108.173	77.6086	78.5744	78.0915	0.721913	-0.470103	88.461	92.2085	90.3347	0.835095	-0.259987	97.5357	78.8105	88.1731	0.815112	-0.29493	74.2344	97.8163	86.0254	0.795257	-0.330507	#N/A	#N/A	#N/A	#N/A	#N/A	#N/A	#N/A	#N/A	#N/A	#N/A	#N/A	#N/A	#N/A						PTRH2	HCN2			FOXQ1
sp|Q14444|CAPR1_HUMAN	CAPRIN1	CAPR1_HUMAN Caprin-1	7	1657.89	1448.14	1553.02	1099.29	1145.85	1122.57	0.722833	-0.468266	1186.7	1316.28	1251.49	0.805845	-0.311425	1198.96	1103.07	1151.01	0.741149	-0.432165	1097.66	1238.21	1167.93	0.752044	-0.411112	#N/A	#N/A	#N/A	#N/A	#N/A	#N/A	#N/A	#N/A	#N/A	#N/A	#N/A	#N/A	#N/A						PYCR1	HCN3			FOXR1
sp|Q14677-3|EPN4_HUMAN	CLINT1	EPN4_HUMAN Isoform 3 of Clathrin interactor 1	42	15585.6	15421.9	15503.8	11609.7	10804.5	11207.1	0.722864	-0.468204	11988	12871.5	12429.8	0.801725	-0.31882	12010.2	10402.2	11206.2	0.722806	-0.46832	9454.83	14310.4	11882.6	0.766435	-0.383765	#N/A	#N/A	#N/A	#N/A	#N/A	#N/A	#N/A	#N/A	#N/A	#N/A	#N/A	#N/A	#N/A						PYURF	HCN4			FOXR2
sp|Q92541|RTF1_HUMAN	RTF1	RTF1_HUMAN RNA polymerase-associated protein RTF1 homolog	2	78.9983	86.0749	82.5366	59.1003	60.2305	59.6654	0.722896	-0.468139	70.77	73.3015	72.0358	0.872773	-0.196321	77.1041	58.7723	67.9382	0.823128	-0.280811	60.6589	76.3784	68.5187	0.830161	-0.268537	#N/A	#N/A	#N/A	#N/A	#N/A	#N/A	#N/A	#N/A	RTF1	#N/A	#N/A	#N/A	#N/A						QRSL1	HCRTR1			FOXS1
sp|Q969G3|SMCE1_HUMAN	SMARCE1	SMCE1_HUMAN SWI/SNF-related matrix-associated actin-dependent regulator of chromatin subfamily E member 1	1	75.2561	76.0252	75.6406	55.0987	54.2863	54.6925	0.723057	-0.467819	61.8102	75.1398	68.475	0.905267	-0.143584	64.7182	61.4386	63.0784	0.833922	-0.262016	61.0856	66.6576	63.8716	0.844408	-0.243987	#N/A	#N/A	#N/A	#N/A	#N/A	#N/A	#N/A	#N/A	SMARCE1	#N/A	#N/A	#N/A	#N/A						RARS2	HCRTR2			FRA10AC1
sp|Q9BXP5|SRRT_HUMAN	SRRT	SRRT_HUMAN Serrate RNA effector molecule homolog	8	1135.9	1202.16	1169.03	802.488	889.632	846.06	0.723728	-0.46648	877.095	1058.19	967.643	0.827731	-0.272766	927.341	891.706	909.524	0.778016	-0.362129	898.413	989.674	944.043	0.807544	-0.308387	#N/A	#N/A	#N/A	#N/A	#N/A	#N/A	#N/A	#N/A	#N/A	#N/A	#N/A	#N/A	#N/A						RBFA	HERVK_113			FRG2
sp|P20749|BCL3_HUMAN	BCL3	BCL3_HUMAN B-cell lymphoma 3 protein	3	452.733	437.201	444.967	307.212	337.779	322.495	0.724763	-0.464419	402.474	351.748	377.111	0.847503	-0.238709	389.585	363.155	376.37	0.845838	-0.241547	335.261	318.256	326.759	0.734343	-0.445474	#N/A	#N/A	#N/A	#N/A	#N/A	#N/A	#N/A	#N/A	#N/A	#N/A	#N/A	#N/A	#N/A						RCC1L	HFE			FRG2B
sp|Q14141|SEPT6_HUMAN	SEPT6	SEPT6_HUMAN Septin-6	1	51.7573	52.2175	51.9874	35.4478	39.9544	37.7011	0.725197	-0.463555	32.1989	45.7089	38.9539	0.749295	-0.416394	50.703	43.9298	47.3164	0.910151	-0.135822	39.2792	35.0122	37.1457	0.714514	-0.484967	#N/A	#N/A	#N/A	#N/A	#N/A	#N/A	#N/A	#N/A	#N/A	#N/A	#N/A	#N/A	#N/A						RDH13	HJV			FRG2C
sp|Q9H0D6|XRN2_HUMAN	XRN2	XRN2_HUMAN 5'-3' exoribonuclease 2	3	333.704	340.923	337.313	234.732	254.984	244.858	0.725906	-0.462145	242.673	273.032	257.852	0.76443	-0.387544	234.574	262.025	248.299	0.736109	-0.442009	259.338	280.057	269.697	0.799546	-0.322748	#N/A	#N/A	#N/A	#N/A	#N/A	#N/A	#N/A	#N/A	XRN2	#N/A	#N/A	#N/A	#N/A						RHOT1	HLA-H			FSBP
sp|P17655|CAN2_HUMAN	CAPN2	CAN2_HUMAN Calpain-2 catalytic subunit	15	3549.92	3653.04	3601.48	2568.55	2660.42	2614.49	0.725947	-0.462063	3314.08	3062.09	3188.09	0.885215	-0.1759	2867.77	2804.01	2835.89	0.787424	-0.344788	2313.44	3080.73	2697.09	0.748882	-0.417189	#N/A	#N/A	#N/A	#N/A	#N/A	#N/A	#N/A	#N/A	#N/A	#N/A	#N/A	#N/A	#N/A						RHOT2	HPN			FTSJ3
sp|Q14247|SRC8_HUMAN	CTTN	SRC8_HUMAN Src substrate cortactin	21	5443.51	5133.5	5288.51	3810.19	3870.87	3840.53	0.726203	-0.461555	4274.26	4580.43	4427.35	0.837164	-0.256418	4559.42	4090.39	4324.9	0.817793	-0.290192	4003.08	4871.47	4437.27	0.839041	-0.253186	#N/A	#N/A	#N/A	#N/A	#N/A	#N/A	#N/A	#N/A	#N/A	#N/A	#N/A	#N/A	#N/A						RMND1	HRH1			FUBP1
sp|Q13618|CUL3_HUMAN	CUL3	CUL3_HUMAN Cullin-3	10	1887.46	2065.62	1976.54	1514.16	1358.52	1436.34	0.726694	-0.46058	1618.26	1512.04	1565.15	0.791864	-0.336676	1757.19	1872.36	1814.78	0.918157	-0.123186	1458.44	1649.77	1554.11	0.786276	-0.346893	#N/A	#N/A	#N/A	#N/A	#N/A	#N/A	#N/A	#N/A	#N/A	#N/A	#N/A	#N/A	#N/A						ROMO1	HRH2			FUBP3
sp|Q6P3W7|SCYL2_HUMAN	SCYL2	SCYL2_HUMAN SCY1-like protein 2	12	2284.86	2331.44	2308.15	1747	1611.83	1679.41	0.727602	-0.458778	2030.93	1763.59	1897.26	0.821983	-0.28282	1926.58	1639.73	1783.15	0.772547	-0.372305	1391.7	2038.75	1715.22	0.743117	-0.428339	#N/A	#N/A	#N/A	#N/A	#N/A	#N/A	#N/A	#N/A	#N/A	#N/A	#N/A	#N/A	#N/A						RPUSD3	HRH3			FUS
sp|Q96AE4-2|FUBP1_HUMAN	FUBP1	FUBP1_HUMAN Isoform 2 of Far upstream element-binding protein 1	8	1242.77	1166.81	1204.79	855.164	898.261	876.712	0.727689	-0.458606	911.726	1151.5	1031.61	0.85626	-0.22388	987.792	905.661	946.726	0.785802	-0.347762	878.782	969.265	924.024	0.766958	-0.38278	#N/A	#N/A	#N/A	#N/A	#N/A	#N/A	#N/A	#N/A	FUBP1	#N/A	#N/A	#N/A	#N/A						RPUSD4	HRH4			FYTTD1
sp|Q6UW56-3|ARAID_HUMAN	ATRAID	ARAID_HUMAN Isoform 3 of All-trans retinoic acid-induced differentiation factor	2	707.695	829.225	768.46	558.638	560.11	559.374	0.727916	-0.458157	525.81	565.344	545.577	0.709961	-0.494187	616.741	661.947	639.344	0.831981	-0.265378	617.806	760.589	689.197	0.896855	-0.157053	#N/A	#N/A	#N/A	#N/A	#N/A	#N/A	#N/A	#N/A	#N/A	#N/A	#N/A	#N/A	#N/A						RSAD1	HSD17B7			GABPA
sp|Q8N6N3|CA052_HUMAN	C1orf52	CA052_HUMAN UPF0690 protein C1orf52	1	65.452	70.7716	68.1118	42.6583	56.5282	49.5932	0.728115	-0.457761	47.5582	57.1847	52.3714	0.768904	-0.379124	56.9417	51.1078	54.0247	0.793178	-0.334284	41.618	48.7744	45.1962	0.663559	-0.591703	#N/A	#N/A	#N/A	#N/A	#N/A	#N/A	#N/A	#N/A	#N/A	#N/A	#N/A	#N/A	#N/A						RTL10	HTR1A			GABPB1
sp|Q9C0K1|S39A8_HUMAN	SLC39A8	S39A8_HUMAN Zinc transporter ZIP8	2	595.507	835.082	715.294	534.626	509.46	522.043	0.729829	-0.454369	666.97	463.766	565.368	0.790399	-0.339347	533.281	672.041	602.661	0.842535	-0.247191	542.841	2243.19	1393.02	1.94747	0.961602	#N/A	#N/A	#N/A	#N/A	#N/A	#N/A	#N/A	#N/A	#N/A	#N/A	#N/A	#N/A	#N/A						SARDH	HTR1B			GABPB2
sp|Q6PJ69|TRI65_HUMAN	TRIM65	TRI65_HUMAN Tripartite motif-containing protein 65	1	41.8865	32.3654	37.126	27.5907	26.7703	27.1805	0.732116	-0.449856	36.9789	31.6703	34.3246	0.924545	-0.113185	43.4318	36.9796	40.2057	1.08295	0.114972	25.9837	36.1452	31.0645	0.836731	-0.257163	#N/A	#N/A	#N/A	#N/A	#N/A	#N/A	#N/A	#N/A	#N/A	#N/A	#N/A	#N/A	#N/A						SARS2	HTR1D			GADD45A
sp|Q96QD8|S38A2_HUMAN	SLC38A2	S38A2_HUMAN Sodium-coupled neutral amino acid transporter 2	15	2859.99	4209.47	3534.73	2469.38	2707.16	2588.27	0.73224	-0.449612	4374.99	2381.51	3378.25	0.955731	-0.0653239	3136.5	4406.7	3771.6	1.06701	0.0935767	4008.18	8548	6278.09	1.77612	0.828726	#N/A	#N/A	#N/A	#N/A	#N/A	#N/A	#N/A	#N/A	#N/A	#N/A	#N/A	#N/A	#N/A						SCO1	HTR1E			GAR1
sp|Q9H0L4|CSTFT_HUMAN	CSTF2T	CSTFT_HUMAN Cleavage stimulation factor subunit 2 tau variant	3	426.118	411.405	418.761	290.712	322.607	306.659	0.732301	-0.449491	358.592	342.197	350.394	0.83674	-0.257149	347.269	321.496	334.382	0.798503	-0.324629	322.88	375.985	349.433	0.834443	-0.261115	#N/A	#N/A	#N/A	#N/A	#N/A	#N/A	#N/A	#N/A	CSTF2T	#N/A	#N/A	#N/A	#N/A						SCO2	HTR1F			GATA1
sp|Q9NRF2|SH2B1_HUMAN	SH2B1	SH2B1_HUMAN SH2B adapter protein 1	2	51.1839	59.7625	55.4732	37.2951	43.9649	40.63	0.732426	-0.449246	45.3817	51.745	48.5633	0.875438	-0.191923	50.3591	50.6011	50.4801	0.909991	-0.136076	34.0747	34.5897	34.3322	0.618897	-0.692229	#N/A	#N/A	#N/A	#N/A	#N/A	#N/A	#N/A	#N/A	#N/A	#N/A	#N/A	#N/A	#N/A						SDHA	HTR2B			GATA2
sp|Q16204|CCDC6_HUMAN	CCDC6	CCDC6_HUMAN Coiled-coil domain-containing protein 6	4	290.688	277.593	284.14	211.051	205.344	208.197	0.732727	-0.448652	257.626	248.209	252.917	0.890114	-0.167938	235.453	213.793	224.623	0.790535	-0.339099	210.526	234.511	222.519	0.783128	-0.352679	#N/A	#N/A	#N/A	#N/A	#N/A	#N/A	#N/A	#N/A	#N/A	#N/A	#N/A	#N/A	#N/A						SDHAF1	HTR2C			GATA3
sp|Q9UPQ0|LIMC1_HUMAN	LIMCH1	LIMC1_HUMAN LIM and calponin homology domains-containing protein 1	23	3921.12	3486.63	3703.88	2659.46	2770.15	2714.81	0.732963	-0.448187	3385.01	3457.01	3421.01	0.92363	-0.114613	3404.2	3141.52	3272.86	0.883631	-0.178484	2659.98	3383.45	3021.72	0.815825	-0.293668	#N/A	#N/A	#N/A	#N/A	#N/A	#N/A	#N/A	#N/A	#N/A	#N/A	#N/A	#N/A	#N/A						SDHAF2	HTR3A			GATA4
sp|Q02535|ID3_HUMAN	ID3	ID3_HUMAN DNA-binding protein inhibitor ID-3	1	114.898	96.6917	105.795	79.2554	75.8925	77.5739	0.733249	-0.447625	98.5286	92.2537	95.3911	0.901662	-0.149342	94.7344	101.584	98.1592	0.927826	-0.108074	84.2058	78.8114	81.5086	0.77044	-0.376245	#N/A	#N/A	#N/A	#N/A	#N/A	#N/A	#N/A	#N/A	ID3	#N/A	#N/A	#N/A	#N/A						SDHAF3	HTR5A			GATA5
sp|Q9UPT8|ZC3H4_HUMAN	ZC3H4	ZC3H4_HUMAN Zinc finger CCCH domain-containing protein 4	1	124.47	121.845	123.157	92.533	88.3011	90.4171	0.734158	-0.445838	93.3393	93.4311	93.3852	0.758258	-0.399239	103.249	94.5067	98.8778	0.802857	-0.316785	89.2056	86.9057	88.0556	0.714984	-0.484017	#N/A	#N/A	#N/A	#N/A	#N/A	#N/A	#N/A	#N/A	#N/A	#N/A	#N/A	#N/A	#N/A						SDHAF4	HTR6			GATA6
sp|P49959|MRE11_HUMAN	MRE11A	MRE11_HUMAN Double-strand break repair protein MRE11A	18	1612.6	1889.62	1751.11	1238.86	1333.4	1286.13	0.734466	-0.445233	1365.95	1528.07	1447.01	0.826339	-0.275195	1347.96	1362.82	1355.39	0.774018	-0.369562	1347.73	1629.8	1488.76	0.850184	-0.234154	#N/A	#N/A	#N/A	#N/A	#N/A	#N/A	#N/A	#N/A	#N/A	#N/A	#N/A	#N/A	#N/A						SDHB	HTR7			GATAD1
sp|Q99081-3|HTF4_HUMAN	TCF12	HTF4_HUMAN Isoform 3 of Transcription factor 12	9	1052.37	1031.72	1042.05	748.808	782.746	765.777	0.734879	-0.444421	882.241	939.291	910.766	0.874018	-0.194265	972.367	871.004	921.686	0.884497	-0.177071	724.739	946.155	835.447	0.801738	-0.318797	#N/A	#N/A	#N/A	#N/A	#N/A	#N/A	#N/A	#N/A	TCF12	#N/A	#N/A	#N/A	#N/A						SDHC	HVCN1			GATAD2A
sp|O43172|PRP4_HUMAN	PRPF4	PRP4_HUMAN U4/U6 small nuclear ribonucleoprotein Prp4	7	935.469	887.54	911.505	632.117	708.115	670.116	0.735176	-0.443839	781.939	801.659	791.799	0.868673	-0.203116	746.215	713.313	729.764	0.800615	-0.32082	659.462	775.105	717.284	0.786923	-0.345706	#N/A	#N/A	#N/A	#N/A	#N/A	#N/A	#N/A	#N/A	PRPF4	#N/A	#N/A	#N/A	#N/A						SDHD	HYAL2			GATAD2B
sp|Q93062-3|RBPMS_HUMAN	RBPMS	RBPMS_HUMAN Isoform C of RNA-binding protein with multiple splicing	1	125.956	126.765	126.361	82.0941	103.717	92.9056	0.735242	-0.443709	119.737	125.29	122.513	0.969555	-0.0446048	113.777	113.31	113.543	0.898568	-0.1543	100.614	81.2538	90.9339	0.719639	-0.474655	#N/A	#N/A	#N/A	#N/A	#N/A	#N/A	#N/A	#N/A	#N/A	#N/A	#N/A	#N/A	#N/A						SELENOO	ICOSLG			GBX1
sp|Q13015|AF1Q_HUMAN	MLLT11	AF1Q_HUMAN Protein AF1q	8	1205.57	1041.85	1123.71	804.909	848.286	826.597	0.735597	-0.443013	941.88	901.419	921.649	0.820184	-0.28598	916.831	787.679	852.255	0.75843	-0.398913	668.984	677.444	673.214	0.599099	-0.739133	#N/A	#N/A	#N/A	#N/A	#N/A	#N/A	#N/A	#N/A	#N/A	#N/A	#N/A	#N/A	#N/A						SFXN1	IFIT5			GBX2
sp|O14562|UBFD1_HUMAN	UBFD1	UBFD1_HUMAN Ubiquitin domain-containing protein UBFD1	2	155.621	153.223	154.422	109.463	117.793	113.628	0.735828	-0.44256	137.263	129.173	133.218	0.862688	-0.213089	154.907	118.149	136.528	0.884123	-0.177681	110.298	124.592	117.445	0.760546	-0.394893	#N/A	#N/A	#N/A	#N/A	#N/A	#N/A	#N/A	#N/A	#N/A	#N/A	#N/A	#N/A	#N/A						SFXN2	IFITM1			GCFC2
sp|Q92945|FUBP2_HUMAN	KHSRP	FUBP2_HUMAN Far upstream element-binding protein 2	14	1559.63	1568.1	1563.87	1136.7	1165.92	1151.31	0.736195	-0.44184	1270.25	1463.02	1366.63	0.873883	-0.194488	1277.48	1266.55	1272.01	0.813379	-0.298	1199.94	1493.55	1346.74	0.861164	-0.215639	#N/A	#N/A	#N/A	#N/A	#N/A	#N/A	#N/A	#N/A	#N/A	#N/A	#N/A	#N/A	#N/A						SFXN3	IFITM10			GCM1
sp|O75376|NCOR1_HUMAN	NCOR1	NCOR1_HUMAN Nuclear receptor corepressor 1	1	104.706	104.023	104.364	77.5628	76.1466	76.8547	0.736407	-0.441426	95.8068	96.6021	96.2044	0.921812	-0.117456	97.7531	73.6237	85.6884	0.821049	-0.284459	76.7003	77.1281	76.9142	0.736977	-0.440309	#N/A	#N/A	#N/A	#N/A	#N/A	#N/A	#N/A	#N/A	NCOR1	#N/A	#N/A	#N/A	#N/A						SFXN4	IFITM2			GCM2
sp|Q9UKI2|BORG2_HUMAN	CDC42EP3	BORG2_HUMAN Cdc42 effector protein 3	4	563.083	549.676	556.38	418.908	400.57	409.739	0.736438	-0.441364	464.957	587.719	526.338	0.946005	-0.0800797	493.521	420.864	457.192	0.821728	-0.283268	342.31	477.648	409.979	0.736869	-0.440519	#N/A	#N/A	#N/A	#N/A	#N/A	#N/A	#N/A	#N/A	#N/A	#N/A	#N/A	#N/A	#N/A						SFXN5	IFITM5			GCNA
sp|Q8IX12|CCAR1_HUMAN	CCAR1	CCAR1_HUMAN Cell division cycle and apoptosis regulator protein 1	7	1481.59	1508.89	1495.24	1050.25	1153.36	1101.8	0.736875	-0.440508	1184.78	1325.61	1255.19	0.839461	-0.252466	1115.4	1119.85	1117.62	0.747455	-0.419941	1115.78	1167.66	1141.72	0.76357	-0.389168	#N/A	#N/A	#N/A	#N/A	#N/A	#N/A	#N/A	#N/A	#N/A	#N/A	#N/A	#N/A	#N/A						SHC1	IFNGR1			GEN1
sp|P15170-3|ERF3A_HUMAN	GSPT1	ERF3A_HUMAN Isoform 3 of Eukaryotic peptide chain release factor GTP-binding subunit ERF3A	9	2349.29	2347.91	2348.6	1677.43	1785.65	1731.54	0.737265	-0.439745	1906.96	2049.49	1978.22	0.8423	-0.247594	1952.16	1869.76	1910.96	0.813659	-0.297503	1754.52	2051.39	1902.95	0.810251	-0.30356	#N/A	#N/A	#N/A	#N/A	#N/A	#N/A	#N/A	#N/A	#N/A	#N/A	#N/A	#N/A	#N/A						SHMT2	IGDCC4			GFI1
sp|Q5VYK3|ECM29_HUMAN	ECM29	ECM29_HUMAN Proteasome-associated protein ECM29 homolog	3	220.697	274.854	247.775	191.609	173.768	182.689	0.737315	-0.439648	204.608	174.637	189.623	0.7653	-0.385903	209.338	208.313	208.825	0.842801	-0.246736	193.442	291.587	242.514	0.978767	-0.0309625	#N/A	#N/A	#N/A	#N/A	#N/A	#N/A	#N/A	#N/A	#N/A	#N/A	#N/A	#N/A	#N/A						SIAH3	IGF1R			GFI1B
sp|Q96AE4|FUBP1_HUMAN	FUBP1	FUBP1_HUMAN Far upstream element-binding protein 1	1	27.8693	26.353	27.1112	16.5427	23.4421	19.9924	0.737424	-0.439435	17.9469	23.2843	20.6156	0.76041	-0.39515	21.4896	12.9933	17.2415	0.635954	-0.653005	17.5112	19.87	18.6906	0.689406	-0.536573	#N/A	#N/A	#N/A	#N/A	#N/A	#N/A	#N/A	#N/A	FUBP1	#N/A	#N/A	#N/A	#N/A						SIRT3	IGFLR1			GINS1
sp|P49756|RBM25_HUMAN	RBM25	RBM25_HUMAN RNA-binding protein 25	8	1751.32	1810.54	1780.93	1181.08	1447.26	1314.17	0.737912	-0.438479	1331.12	1575.88	1453.5	0.816147	-0.2931	1468.18	1476.44	1472.31	0.826709	-0.274549	1626.61	1474.19	1550.4	0.870556	-0.19999	#N/A	#N/A	#N/A	#N/A	#N/A	#N/A	#N/A	#N/A	#N/A	#N/A	#N/A	#N/A	#N/A						SIRT4	IGSF11			GINS2
sp|O15355|PPM1G_HUMAN	PPM1G	PPM1G_HUMAN Protein phosphatase 1G	5	2151.76	2028.57	2090.16	1512.88	1571.84	1542.36	0.737913	-0.438477	1681.11	1842.12	1761.61	0.842811	-0.246718	1903.18	1692.98	1798.08	0.860257	-0.21716	1531.25	1868.18	1699.72	0.813197	-0.298324	#N/A	#N/A	#N/A	#N/A	#N/A	#N/A	#N/A	#N/A	#N/A	#N/A	#N/A	#N/A	#N/A						SLC25A1	IGSF21			GINS3
sp|P51858|HDGF_HUMAN	HDGF	HDGF_HUMAN Hepatoma-derived growth factor	4	856.445	660.529	758.487	569.384	550.129	559.756	0.737991	-0.438325	624.242	790.493	707.368	0.932603	-0.100665	655.385	569.445	612.415	0.807417	-0.308615	555.696	674.024	614.86	0.81064	-0.302866	#N/A	#N/A	#N/A	#N/A	#N/A	#N/A	#N/A	#N/A	#N/A	#N/A	#N/A	#N/A	#N/A						SLC25A10	IGSF5			GLI4
sp|Q6P1J9|CDC73_HUMAN	CDC73	CDC73_HUMAN Parafibromin	4	368.39	387.718	378.054	272.078	286.333	279.206	0.738533	-0.437265	282.865	334.046	308.456	0.815903	-0.29353	343.958	319.864	331.911	0.877946	-0.187796	326.906	342.766	334.836	0.885683	-0.175138	#N/A	#N/A	#N/A	#N/A	#N/A	#N/A	#N/A	#N/A	CDC73	#N/A	#N/A	#N/A	#N/A						SLC25A11	IGSF8			GLIS1
sp|O76070|SYUG_HUMAN	SNCG	SYUG_HUMAN Gamma-synuclein	11	2704.05	2813.09	2758.57	2075.45	2001.07	2038.26	0.738883	-0.436582	2560.98	2418.9	2489.94	0.90262	-0.14781	2225.6	2094.65	2160.12	0.78306	-0.352806	1849.14	2111.39	1980.26	0.717859	-0.478227	#N/A	#N/A	#N/A	#N/A	#N/A	#N/A	#N/A	#N/A	#N/A	#N/A	#N/A	#N/A	#N/A						SLC25A12	IGSF9			GLIS3
sp|Q96HC4|PDLI5_HUMAN	PDLIM5	PDLI5_HUMAN PDZ and LIM domain protein 5	21	3122.73	2810.12	2966.43	2139.48	2247.87	2193.68	0.739501	-0.435376	2453.77	2395.72	2424.74	0.817396	-0.290892	2471.23	2299.32	2385.28	0.804091	-0.31457	2142.72	2509.11	2325.91	0.78408	-0.350927	#N/A	#N/A	#N/A	#N/A	#N/A	#N/A	#N/A	#N/A	#N/A	#N/A	#N/A	#N/A	#N/A						SLC25A13	IGSF9B			GLYR1
sp|P25685|DNJB1_HUMAN	DNAJB1	DNJB1_HUMAN DnaJ homolog subfamily B member 1	34	14577.8	11846.3	13212	9635.26	9915.55	9775.4	0.739886	-0.434626	12548.2	12225	12386.6	0.937523	-0.0930741	11531.6	9908.38	10720	0.81138	-0.301551	8712.66	8501.73	8607.19	0.651466	-0.618239	#N/A	#N/A	#N/A	#N/A	#N/A	#N/A	#N/A	#N/A	#N/A	#N/A	#N/A	#N/A	#N/A						SLC25A14	IL17RC			GMCL1
sp|Q93009|UBP7_HUMAN	USP7	UBP7_HUMAN Ubiquitin carboxyl-terminal hydrolase 7	10	1432.81	1601.41	1517.11	1148.14	1098.47	1123.31	0.740424	-0.433576	1226.73	1194.77	1210.75	0.798063	-0.325425	1196.21	1132.1	1164.15	0.76735	-0.382043	1080.51	1447.13	1263.82	0.833044	-0.263535	#N/A	#N/A	#N/A	#N/A	#N/A	#N/A	#N/A	#N/A	#N/A	#N/A	#N/A	#N/A	#N/A						SLC25A15	IL18RAP			GMCL2
sp|P01023|A2MG_HUMAN	A2M	A2MG_HUMAN Alpha-2-macroglobulin	12	4256.82	4543.62	4400.22	3053.67	3464.28	3258.98	0.740639	-0.433157	4308.91	3215.27	3762.09	0.854978	-0.226041	4044.39	4716.29	4380.34	0.995482	-0.0065328	3371.79	4719.98	4045.88	0.919473	-0.12112	#N/A	#N/A	#N/A	#N/A	#N/A	#N/A	#N/A	#N/A	#N/A	#N/A	#N/A	#N/A	#N/A						SLC25A16	IL23R			GMNC
sp|Q9UHV9|PFD2_HUMAN	PFDN2	PFD2_HUMAN Prefoldin subunit 2	9	1250.94	1176.45	1213.7	883.373	915.405	899.389	0.741034	-0.432389	1028.91	1085.71	1057.31	0.87115	-0.199007	1101	1015.55	1058.28	0.871945	-0.197691	873.254	993.364	933.309	0.768981	-0.378979	#N/A	#N/A	#N/A	#N/A	#N/A	#N/A	#N/A	#N/A	#N/A	#N/A	#N/A	#N/A	#N/A						SLC25A18	IL2RB			GNAQ
tr|E9PAU2|E9PAU2_HUMAN	RAVER1	E9PAU2_HUMAN Ribonucleoprotein PTB-binding 1	54	14412.3	14334.1	14373.2	10489	10819.9	10654.5	0.741272	-0.431925	11332.8	11955	11643.9	0.810112	-0.303807	11909.8	10216.7	11063.2	0.769714	-0.377606	9212.25	9125.3	9168.77	0.637908	-0.64858	#N/A	#N/A	#N/A	#N/A	#N/A	#N/A	#N/A	#N/A	#N/A	#N/A	#N/A	#N/A	#N/A						SLC25A19	IL2RG			GNL2
sp|Q96LZ7-2|RMD2_HUMAN	RMDN2	RMD2_HUMAN Isoform 2 of Regulator of microtubule dynamics protein 2	1	656.314	659.822	658.068	502.213	473.405	487.809	0.741274	-0.43192	526.538	464.233	495.385	0.752788	-0.409685	539.811	566.116	552.964	0.840283	-0.251052	499.159	531.167	515.163	0.782842	-0.353208	#N/A	#N/A	#N/A	#N/A	#N/A	#N/A	#N/A	#N/A	#N/A	#N/A	#N/A	#N/A	#N/A						SLC25A2	IL31RA			GNL3
sp|Q00341|VIGLN_HUMAN	HDLBP	VIGLN_HUMAN Vigilin	13	3205.34	3542.01	3373.68	2383.5	2621.75	2502.62	0.74181	-0.430879	2583.75	3144.45	2864.1	0.848956	-0.236239	2555.78	2496.95	2526.36	0.748847	-0.417258	2254.24	2788.11	2521.18	0.747308	-0.420225	#N/A	#N/A	#N/A	#N/A	#N/A	#N/A	#N/A	#N/A	#N/A	#N/A	#N/A	#N/A	#N/A						SLC25A20	INPP5A			GNL3L
sp|O60925|PFD1_HUMAN	PFDN1	PFD1_HUMAN Prefoldin subunit 1	2	773.073	764.329	768.701	537.545	603.824	570.684	0.742401	-0.429729	743.996	716.579	730.287	0.950028	-0.073958	640.896	630.48	635.688	0.826964	-0.274104	592.803	555.748	574.275	0.747073	-0.42068	#N/A	#N/A	#N/A	#N/A	#N/A	#N/A	#N/A	#N/A	#N/A	#N/A	#N/A	#N/A	#N/A						SLC25A21	ISLR2			GON4L
sp|P42684|ABL2_HUMAN	ABL2	ABL2_HUMAN Abelson tyrosine-protein kinase 2	1	104.712	113.85	109.281	81.0853	81.1878	81.1365	0.742458	-0.429619	102.13	92.0078	97.0689	0.88825	-0.170962	109.239	96.0877	102.663	0.939444	-0.0901213	88.7159	147.547	118.131	1.08099	0.112351	#N/A	#N/A	#N/A	#N/A	#N/A	#N/A	#N/A	#N/A	#N/A	#N/A	#N/A	#N/A	#N/A						SLC25A22	ITGA3			GON7
sp|Q13765-2|NACA_HUMAN	NACA	NACA_HUMAN Isoform 2 of Nascent polypeptide-associated complex subunit alpha	10	3102	2895.29	2998.64	2059.78	2393.78	2226.78	0.742595	-0.429352	2499.71	2598.61	2549.16	0.850104	-0.234289	2506.52	2568.01	2537.27	0.846137	-0.241037	2311.69	2055.08	2183.39	0.728124	-0.457744	#N/A	#N/A	#N/A	#N/A	#N/A	#N/A	#N/A	#N/A	#N/A	#N/A	#N/A	#N/A	#N/A						SLC25A23	ITGA6			GPATCH2
sp|P08579|RU2B_HUMAN	SNRPB2	RU2B_HUMAN U2 small nuclear ribonucleoprotein B''	2	191.134	191.971	191.553	139.553	144.974	142.263	0.742687	-0.429174	159.704	155.769	157.737	0.823464	-0.280223	160.659	167.028	163.844	0.855345	-0.225421	164.245	116.087	140.166	0.731737	-0.450603	#N/A	#N/A	#N/A	#N/A	#N/A	#N/A	#N/A	#N/A	SNRPB2	#N/A	#N/A	#N/A	#N/A						SLC25A24	ITGA8			GPBP1L1
sp|O43290|SNUT1_HUMAN	SART1	SNUT1_HUMAN U4/U6.U5 tri-snRNP-associated protein 1	1	43.7634	56.6858	50.2246	37.5281	37.1321	37.3301	0.743263	-0.428055	39.5956	72.3286	55.9621	1.11424	0.156056	44.7498	50.5449	47.6474	0.948686	-0.0759982	52.4271	52.0684	52.2477	1.04028	0.0569747	#N/A	#N/A	#N/A	#N/A	#N/A	#N/A	#N/A	#N/A	SART1	#N/A	#N/A	#N/A	#N/A						SLC25A25	ITGAL			GPKOW
sp|Q8NFT8|DNER_HUMAN	DNER	DNER_HUMAN Delta and Notch-like epidermal growth factor-related receptor	1	185.233	198.515	191.874	148.095	137.156	142.625	0.743329	-0.427927	153.752	118.389	136.071	0.709166	-0.495805	169.426	181.933	175.679	0.915598	-0.127213	175.655	194.221	184.938	0.963851	-0.0531175	#N/A	#N/A	#N/A	#N/A	#N/A	#N/A	#N/A	#N/A	#N/A	#N/A	#N/A	#N/A	#N/A						SLC25A26	ITGAM			GRHL1
sp|Q8IZW8|TENS4_HUMAN	TNS4	TENS4_HUMAN Tensin-4	1	57.9571	65.9666	61.9618	53.7456	38.4276	46.0866	0.74379	-0.427033	40.9399	50.7011	45.8205	0.739495	-0.435387	51.6986	49.5043	50.6014	0.816655	-0.292201	39.5039	54.1903	46.8471	0.756064	-0.40342	#N/A	#N/A	#N/A	#N/A	#N/A	#N/A	#N/A	#N/A	#N/A	#N/A	#N/A	#N/A	#N/A						SLC25A27	ITGAV			GRHL2
sp|Q8N807|PDILT_HUMAN	PDILT	PDILT_HUMAN Protein disulfide-isomerase-like protein of the testis	1	141.458	166.741	154.1	113.11	116.32	114.715	0.744422	-0.425808	131.271	104.062	117.666	0.763575	-0.389159	113.54	129.462	121.501	0.788458	-0.342894	122.181	126.238	124.209	0.806034	-0.311087	PDILT	#N/A	#N/A	#N/A	#N/A	#N/A	#N/A	#N/A	#N/A	#N/A	#N/A	#N/A	#N/A						SLC25A28	ITGB2			GRHL3
sp|P25205|MCM3_HUMAN	MCM3	MCM3_HUMAN DNA replication licensing factor MCM3	17	3473.27	3739.51	3606.39	2625.06	2744.53	2684.8	0.744455	-0.425743	2760.99	3198.35	2979.67	0.82622	-0.275403	2776.39	2833.9	2805.14	0.777826	-0.36248	2621.91	3004.28	2813.1	0.780031	-0.358397	#N/A	#N/A	#N/A	#N/A	#N/A	#N/A	#N/A	#N/A	MCM3	#N/A	#N/A	#N/A	#N/A						SLC25A29	ITGB3			GRWD1
sp|P13726|TF_HUMAN	F3	TF_HUMAN Tissue factor	7	860.566	1049.05	954.808	687.707	735.401	711.554	0.745233	-0.424237	840.581	647.978	744.279	0.779507	-0.359366	828.627	974.449	901.538	0.944209	-0.0828224	849.218	2083.04	1466.13	1.53552	0.618729	#N/A	#N/A	#N/A	#N/A	#N/A	#N/A	#N/A	#N/A	#N/A	#N/A	#N/A	#N/A	#N/A						SLC25A3	ITGB4			GSC
sp|P49810|PSN2_HUMAN	PSEN2	PSN2_HUMAN Presenilin-2	2	101.605	104.784	103.195	72.0833	81.7304	76.9068	0.745261	-0.424182	82.082	76.6832	79.3826	0.769252	-0.378471	81.0278	80.2981	80.6629	0.781659	-0.355388	69.8444	86.5925	78.2184	0.757971	-0.399785	#N/A	#N/A	#N/A	#N/A	#N/A	#N/A	#N/A	#N/A	#N/A	#N/A	#N/A	#N/A	#N/A						SLC25A30	ITGB8			GSC2
sp|Q9BTD8|RBM42_HUMAN	RBM42	RBM42_HUMAN RNA-binding protein 42	3	729.728	673.301	701.514	507.813	538.025	522.919	0.745414	-0.423885	590.491	562.625	576.558	0.821876	-0.283007	593.299	553.311	573.305	0.817239	-0.29117	529.722	520.803	525.263	0.748755	-0.417434	#N/A	#N/A	#N/A	#N/A	#N/A	#N/A	#N/A	#N/A	#N/A	#N/A	#N/A	#N/A	#N/A						SLC25A31	IZUMO1R			GSX1
sp|Q92542|NICA_HUMAN	NCSTN	NICA_HUMAN Nicastrin	31	9946.27	11123.5	10534.9	7743.67	7971.49	7857.58	0.745863	-0.423018	8805	7207.18	8006.09	0.75996	-0.396005	8340.65	8923.5	8632.08	0.81938	-0.287395	7928.34	11294.2	9611.27	0.912328	-0.132376	#N/A	#N/A	#N/A	#N/A	#N/A	#N/A	#N/A	#N/A	#N/A	#N/A	#N/A	#N/A	#N/A						SLC25A32	IZUMO3			GSX2
sp|Q14142|TRI14_HUMAN	TRIM14	TRI14_HUMAN Tripartite motif-containing protein 14	8	742.544	763.179	752.861	585.037	538.822	561.929	0.746392	-0.421995	577.582	501.631	539.606	0.716741	-0.480477	734.69	765.119	749.905	0.996072	-0.0056776	619.569	705.915	662.742	0.880297	-0.183937	#N/A	#N/A	#N/A	#N/A	TRIM14	#N/A	#N/A	#N/A	#N/A	#N/A	#N/A	#N/A	#N/A						SLC25A33	JAM2			GTF2A1
sp|Q9H3U5-6|MFSD1_HUMAN	MFSD1	MFSD1_HUMAN Isoform 6 of Major facilitator superfamily domain-containing protein 1	3	648.528	724.524	686.526	558.89	465.989	512.439	0.746424	-0.421933	551.309	438.333	494.821	0.720761	-0.472408	513.352	572.8	543.076	0.791049	-0.33816	438.537	511.785	475.161	0.692124	-0.530898	#N/A	#N/A	#N/A	#N/A	#N/A	#N/A	#N/A	#N/A	#N/A	#N/A	#N/A	#N/A	#N/A						SLC25A34	JAML			GTF2A1L
sp|Q9UHD9|UBQL2_HUMAN	UBQLN2	UBQL2_HUMAN Ubiquilin-2	11	4271.23	4493.12	4382.17	3301.71	3245.6	3273.65	0.747039	-0.420745	3477.56	3693.57	3585.57	0.818216	-0.289447	3696.14	3422.84	3559.49	0.812266	-0.299977	2978.18	5175.43	4076.81	0.930315	-0.104208	#N/A	#N/A	#N/A	#N/A	#N/A	#N/A	#N/A	#N/A	#N/A	#N/A	#N/A	#N/A	#N/A						SLC25A35	KCNA3			GTF2A2
sp|P08047|SP1_HUMAN	SP1	SP1_HUMAN Transcription factor Sp1	2	50.5846	42.6548	46.6197	34.5164	35.1479	34.8321	0.747155	-0.42052	37.3822	40.112	38.7471	0.831131	-0.266851	38.5248	30.427	34.4759	0.739514	-0.435352	28.6987	44.5005	36.5996	0.785067	-0.349112	#N/A	#N/A	#N/A	#N/A	#N/A	#N/A	#N/A	#N/A	#N/A	#N/A	#N/A	#N/A	#N/A						SLC25A36	KCNA4			GTF2B
sp|Q9UHX1|PUF60_HUMAN	PUF60	PUF60_HUMAN Poly(U)-binding-splicing factor PUF60	19	4487.47	4495.39	4491.43	3319.96	3397.73	3358.85	0.747834	-0.41921	3813.04	3990.3	3901.67	0.868692	-0.203083	3520.95	3450.61	3485.78	0.776096	-0.365693	3156.09	3192.79	3174.44	0.706777	-0.500673	#N/A	#N/A	#N/A	#N/A	#N/A	#N/A	#N/A	#N/A	PUF60	#N/A	#N/A	#N/A	#N/A						SLC25A37	KCNA5			GTF2E1
sp|Q9P0W2|HM20B_HUMAN	HMG20B	HM20B_HUMAN SWI/SNF-related matrix-associated actin-dependent regulator of chromatin subfamily E member 1-related	2	39.9865	34.0466	37.0165	28.7153	26.6657	27.6905	0.748057	-0.418779	37.9134	33.174	35.5437	0.960211	-0.0585766	37.7932	31.2886	34.5409	0.93312	-0.0998648	32.9408	29.9521	31.4465	0.849524	-0.235273	#N/A	#N/A	#N/A	#N/A	#N/A	#N/A	#N/A	#N/A	HMG20B	#N/A	#N/A	#N/A	#N/A						SLC25A38	KCNA6			GTF2E2
sp|P41134|ID1_HUMAN	ID1	ID1_HUMAN DNA-binding protein inhibitor ID-1	2	621.357	579.503	600.43	432.177	466.289	449.233	0.748185	-0.418532	602.196	606.806	604.501	1.00678	0.00974866	630.531	530.099	580.315	0.966499	-0.0491598	411.083	448.462	429.773	0.715775	-0.482423	#N/A	#N/A	#N/A	#N/A	#N/A	#N/A	#N/A	#N/A	#N/A	#N/A	#N/A	#N/A	#N/A						SLC25A39	KCNB2			GTF2F1
sp|Q15393|SF3B3_HUMAN	SF3B3	SF3B3_HUMAN Splicing factor 3B subunit 3	9	1558.74	1832.33	1695.53	1252.82	1288.23	1270.53	0.749336	-0.416316	1461.04	1498.28	1479.66	0.87268	-0.196475	1372.38	1449.67	1411.03	0.8322	-0.264997	1328.93	1566.03	1447.48	0.853701	-0.228197	#N/A	#N/A	#N/A	#N/A	#N/A	#N/A	#N/A	#N/A	SF3B3	#N/A	#N/A	#N/A	#N/A						SLC25A4	KCNC1			GTF2F2
sp|Q9BVL2|NUPL1_HUMAN	NUPL1	NUPL1_HUMAN Nucleoporin p58/p45	3	430.517	466.756	448.636	318.73	353.98	336.355	0.749727	-0.415562	374.89	399.777	387.333	0.863357	-0.211971	357.7	366.405	362.053	0.807006	-0.309348	325.465	459.283	392.374	0.874592	-0.193318	#N/A	#N/A	#N/A	#N/A	#N/A	#N/A	#N/A	#N/A	#N/A	#N/A	#N/A	#N/A	#N/A						SLC25A40	KCNC2			GTF2H1
sp|Q14527|HLTF_HUMAN	HLTF	HLTF_HUMAN Helicase-like transcription factor	1	85.6581	89.0404	87.3493	63.6971	67.2942	65.4956	0.749814	-0.415396	56.4096	78.1505	67.28	0.770242	-0.376617	60.399	56.1005	58.2497	0.66686	-0.584543	53.88	53.1749	53.5275	0.612798	-0.706516	#N/A	#N/A	#N/A	#N/A	#N/A	#N/A	#N/A	#N/A	#N/A	#N/A	#N/A	#N/A	#N/A						SLC25A41	KCND3			GTF2H2
sp|Q86XP3|DDX42_HUMAN	DDX42	DDX42_HUMAN ATP-dependent RNA helicase DDX42	5	482.334	424.94	453.637	319.647	361.256	340.452	0.750493	-0.414089	306.601	412.345	359.473	0.792424	-0.335655	396.658	354.875	375.767	0.828342	-0.271702	340.77	387.959	364.365	0.803207	-0.316156	#N/A	#N/A	#N/A	#N/A	#N/A	#N/A	#N/A	#N/A	#N/A	#N/A	#N/A	#N/A	#N/A						SLC25A42	KCNE1			GTF2H2C
sp|O60341-2|KDM1A_HUMAN	KDM1A	KDM1A_HUMAN Isoform 2 of Lysine-specific histone demethylase 1A	10	1750.4	1657.07	1703.74	1253.11	1304.39	1278.75	0.750557	-0.413967	1569.49	1469.3	1519.39	0.891802	-0.165204	1510.99	1391.83	1451.41	0.851899	-0.231246	1356.72	1383.66	1370.19	0.804227	-0.314325	#N/A	#N/A	#N/A	#N/A	#N/A	#N/A	#N/A	#N/A	KDM1A	#N/A	#N/A	#N/A	#N/A						SLC25A43	KCNE2			GTF2H3
sp|Q14011|CIRBP_HUMAN	CIRBP	CIRBP_HUMAN Cold-inducible RNA-binding protein	1	299.479	254.847	277.163	213.867	202.265	208.066	0.750699	-0.413693	183.217	327.151	255.184	0.9207	-0.119197	227.022	211.765	219.393	0.791568	-0.337214	212.954	232.035	222.495	0.802757	-0.316965	#N/A	#N/A	#N/A	#N/A	#N/A	#N/A	#N/A	#N/A	#N/A	#N/A	#N/A	#N/A	#N/A						SLC25A44	KCNG1			GTF2H4
sp|Q13263|TIF1B_HUMAN	TRIM28	TIF1B_HUMAN Transcription intermediary factor 1-beta	39	7435.29	8217.81	7826.55	5791.12	5965.81	5878.47	0.751093	-0.412937	6664.96	7167.52	6916.24	0.883689	-0.178389	6809.57	6620.24	6714.9	0.857965	-0.22101	5984.42	8209.14	7096.78	0.906757	-0.141212	#N/A	#N/A	#N/A	#N/A	#N/A	#N/A	#N/A	#N/A	TRIM28	#N/A	#N/A	#N/A	#N/A						SLC25A45	KCNG4			GTF2H5
sp|P51991|ROA3_HUMAN	HNRNPA3	ROA3_HUMAN Heterogeneous nuclear ribonucleoprotein A3	4	1617.53	1606.14	1611.84	1231.56	1190.25	1210.9	0.751259	-0.412618	1265.5	1714.99	1490.24	0.924564	-0.113155	1346.86	1245.9	1296.38	0.804288	-0.314215	1453.18	1790.57	1621.88	1.00623	0.00895857	#N/A	#N/A	#N/A	#N/A	#N/A	#N/A	#N/A	#N/A	HNRNPA3	#N/A	#N/A	#N/A	#N/A						SLC25A46	KCNH2			GTF2IRD1
sp|Q86U06-2|RBM23_HUMAN	RBM23	RBM23_HUMAN Isoform 2 of Probable RNA-binding protein 23	3	552.687	527.25	539.968	397.627	414.129	405.878	0.75167	-0.411829	509.323	469.283	489.303	0.90617	-0.142147	506.032	470.396	488.214	0.904153	-0.145362	404.809	552.109	478.459	0.886087	-0.17448	#N/A	#N/A	#N/A	#N/A	#N/A	#N/A	#N/A	#N/A	RBM23	#N/A	#N/A	#N/A	#N/A						SLC25A47	KCNIP2			GTF2IRD2
sp|O75534-3|CSDE1_HUMAN	CSDE1	CSDE1_HUMAN Isoform 3 of Cold shock domain-containing protein E1	8	1055.72	1029.91	1042.82	788.533	779.698	784.115	0.751922	-0.411345	793.557	919.618	856.588	0.821418	-0.283811	830.806	829.282	830.044	0.795965	-0.329224	775.422	870.212	822.817	0.789034	-0.34184	#N/A	#N/A	#N/A	#N/A	#N/A	#N/A	#N/A	#N/A	#N/A	CSDE1	#N/A	#N/A	#N/A						SLC25A48	KCNJ1			GTF2IRD2B
sp|Q8NHG8|ZNRF2_HUMAN	ZNRF2	ZNRF2_HUMAN E3 ubiquitin-protein ligase ZNRF2	4	123.991	158.309	141.15	100.314	111.954	106.134	0.751923	-0.411342	94.9253	111.688	103.307	0.731893	-0.450296	124.232	105.416	114.824	0.813489	-0.297805	114.763	138.818	126.791	0.898268	-0.154782	#N/A	#N/A	#N/A	#N/A	#N/A	#N/A	#N/A	#N/A	#N/A	#N/A	#N/A	#N/A	#N/A						SLC25A5	KCNJ10			GTF3A
sp|Q12872-2|SFSWA_HUMAN	SFSWAP	SFSWA_HUMAN Isoform 2 of Splicing factor, suppressor of white-apricot homolog	1	89.2975	85.7468	87.5221	62.7986	68.8968	65.8477	0.752355	-0.410515	68.8408	73.0737	70.9573	0.810735	-0.302698	81.8394	78.5949	80.2172	0.916535	-0.125737	78.7432	80.0723	79.4077	0.907287	-0.140368	#N/A	#N/A	#N/A	#N/A	#N/A	#N/A	#N/A	#N/A	SFSWAP	#N/A	#N/A	#N/A	#N/A						SLC25A51	KCNJ12			GTF3C1
sp|Q96G74|OTUD5_HUMAN	OTUD5	OTUD5_HUMAN OTU domain-containing protein 5	1	17.6356	16.9173	17.2765	13.8322	12.164	12.9981	0.752359	-0.410506	13.4224	13.4476	13.435	0.777648	-0.36281	12.973	12.5375	12.7553	0.738303	-0.437716	13.8684	12.7453	13.3069	0.770231	-0.376638	#N/A	#N/A	#N/A	#N/A	#N/A	#N/A	#N/A	#N/A	#N/A	#N/A	#N/A	#N/A	#N/A						SLC25A52	KCNJ16			GTF3C2
sp|Q92917|GPKOW_HUMAN	GPKOW	GPKOW_HUMAN G patch domain and KOW motifs-containing protein	8	1084.63	967.751	1026.19	737.966	806.438	772.202	0.752494	-0.410248	932.423	937.54	934.981	0.911119	-0.134289	931.388	829.575	880.482	0.85801	-0.220934	775.951	704.108	740.029	0.721142	-0.471644	#N/A	#N/A	#N/A	#N/A	#N/A	#N/A	#N/A	#N/A	GPKOW	#N/A	#N/A	#N/A	#N/A						SLC25A53	KCNJ18			GTF3C3
sp|P12268|IMDH2_HUMAN	IMPDH2	IMDH2_HUMAN Inosine-5'-monophosphate dehydrogenase 2	23	4302.75	4363.28	4333.01	3170.51	3353.27	3261.89	0.752799	-0.409663	3823.06	3533.78	3678.42	0.848929	-0.236285	3433.36	3998.6	3715.98	0.857597	-0.221628	3520.81	3344.78	3432.8	0.792242	-0.335988	#N/A	#N/A	#N/A	#N/A	#N/A	#N/A	#N/A	#N/A	#N/A	#N/A	#N/A	#N/A	#N/A						SLC25A6	KCNK18			GTF3C4
sp|Q00537|CDK17_HUMAN	CDK17	CDK17_HUMAN Cyclin-dependent kinase 17	2	218.85	196.997	207.923	144.011	169.471	156.741	0.75384	-0.40767	184.559	179.923	182.241	0.876481	-0.190205	173.856	174.701	174.279	0.838186	-0.254658	168.85	201.996	185.423	0.891785	-0.165233	#N/A	#N/A	#N/A	#N/A	#N/A	#N/A	#N/A	#N/A	#N/A	#N/A	#N/A	#N/A	#N/A						SLC27A3	KCNK3			GTF3C5
sp|Q6Y7W6|PERQ2_HUMAN	GIGYF2	PERQ2_HUMAN PERQ amino acid-rich with GYF domain-containing protein 2	44	7562.95	7096.53	7329.74	5144.82	5907	5525.91	0.753903	-0.40755	6463.12	6493.85	6478.49	0.883863	-0.178106	6256.75	6039.36	6148.06	0.838782	-0.253632	5358.07	6741.96	6050.01	0.825406	-0.276823	#N/A	#N/A	#N/A	#N/A	#N/A	#N/A	#N/A	#N/A	#N/A	#N/A	#N/A	#N/A	#N/A						SLC8B1	KCNK4			GTF3C6
sp|P54725|RD23A_HUMAN	RAD23A	RD23A_HUMAN UV excision repair protein RAD23 homolog A	4	84.7542	79.3983	82.0763	62.9384	60.8333	61.8859	0.754004	-0.407355	87.2308	78.8567	83.0438	1.01179	0.0169068	77.3135	65.5169	71.4152	0.870108	-0.200734	51.879	60.3608	56.1199	0.683753	-0.548452	#N/A	#N/A	#N/A	#N/A	#N/A	#N/A	#N/A	#N/A	RAD23A	#N/A	#N/A	#N/A	#N/A						SMDT1	KCNK9			GTPBP10
sp|Q9NR56|MBNL1_HUMAN	MBNL1	MBNL1_HUMAN Muscleblind-like protein 1	4	532.074	453.091	492.582	335.148	407.922	371.535	0.754259	-0.406867	442.755	445.844	444.299	0.90198	-0.148833	365.91	371.528	368.719	0.748543	-0.417844	379.054	319.661	349.357	0.709237	-0.495661	#N/A	#N/A	#N/A	#N/A	#N/A	#N/A	#N/A	#N/A	#N/A	#N/A	#N/A	#N/A	#N/A						SMIM20	KCNMA1			GTPBP4
sp|Q14671-3|PUM1_HUMAN	PUM1	PUM1_HUMAN Isoform 3 of Pumilio homolog 1	11	2212.81	2114.34	2163.57	1571.52	1692.47	1631.99	0.754305	-0.40678	1832.94	1812.16	1822.55	0.842379	-0.247459	1773.83	1664.39	1719.11	0.794569	-0.331755	1592.72	2163.98	1878.35	0.86817	-0.203951	#N/A	#N/A	#N/A	#N/A	#N/A	#N/A	#N/A	#N/A	#N/A	#N/A	#N/A	#N/A	#N/A						SNN	KCNN4			H1-0
sp|O75717|WDHD1_HUMAN	WDHD1	WDHD1_HUMAN WD repeat and HMG-box DNA-binding protein 1	3	258.581	239.685	249.133	170.893	205.202	188.048	0.754808	-0.405819	250.914	245.746	248.33	0.996777	-0.00465757	239.356	190.773	215.065	0.863252	-0.212147	189.511	231.365	210.438	0.844681	-0.243521	#N/A	#N/A	#N/A	#N/A	#N/A	#N/A	#N/A	#N/A	WDHD1	#N/A	#N/A	#N/A	#N/A						SOD2	KCNQ2			H1-1
sp|Q9H1B7|I2BPL_HUMAN	IRF2BPL	I2BPL_HUMAN Interferon regulatory factor 2-binding protein-like	9	1269.58	1365.89	1317.74	1012.61	976.673	994.641	0.754811	-0.405812	1015.1	1056.3	1035.7	0.78597	-0.347454	1125.33	963.76	1044.55	0.792682	-0.335186	932.694	1213.65	1073.17	0.814407	-0.296179	#N/A	#N/A	#N/A	#N/A	#N/A	#N/A	#N/A	#N/A	IRF2BPL	#N/A	#N/A	#N/A	#N/A						SPATA19	KCNQ3			H1-2
sp|Q01130|SRSF2_HUMAN	SRSF2	SRSF2_HUMAN Serine/arginine-rich splicing factor 2	2	242.113	216.91	229.512	171.737	174.818	173.278	0.754984	-0.405482	180.682	265.4	223.041	0.971808	-0.0412575	197.518	200.292	198.905	0.866645	-0.206487	192.807	167.625	180.216	0.785216	-0.348839	#N/A	#N/A	#N/A	#N/A	#N/A	#N/A	#N/A	#N/A	SRSF2	#N/A	#N/A	#N/A	#N/A						SPG7	KCNQ4			H1-3
sp|A6NHT5|HMX3_HUMAN	HMX3	HMX3_HUMAN Homeobox protein HMX3	1	394.118	300.835	347.476	237.885	287.853	262.869	0.756509	-0.402571	349.307	342.199	345.753	0.99504	-0.00717364	279.115	320.062	299.589	0.862183	-0.213933	216.677	201.795	209.236	0.602159	-0.731784	#N/A	#N/A	#N/A	#N/A	#N/A	#N/A	#N/A	#N/A	HMX3	#N/A	#N/A	#N/A	#N/A						SPNS1	KCNQ5			H1-4
sp|Q658Y4|F91A1_HUMAN	FAM91A1	F91A1_HUMAN Protein FAM91A1	2	51.3756	53.2535	52.3145	40.8397	38.3404	39.5901	0.756769	-0.402074	55.1143	43.8209	49.4676	0.94558	-0.0807283	53.5191	48.9281	51.2236	0.979146	-0.0304036	39.9944	63.9166	51.9555	0.993137	-0.00993577	#N/A	#N/A	FAM91A1	#N/A	#N/A	#N/A	#N/A	#N/A	#N/A	#N/A	#N/A	#N/A	#N/A						SQOR	KCNS1			H1-5
sp|Q9NRZ9|HELLS_HUMAN	HELLS	HELLS_HUMAN Lymphoid-specific helicase	2	174.63	198.038	186.334	127.749	154.319	141.034	0.756888	-0.401848	156.097	178.866	167.482	0.898824	-0.153889	169.462	167.548	168.505	0.904317	-0.1451	143.647	189.53	166.589	0.894032	-0.161602	#N/A	#N/A	#N/A	#N/A	#N/A	#N/A	#N/A	#N/A	HELLS	#N/A	#N/A	#N/A	#N/A						SSBP1	KCNS2			H1FNT
sp|O75629|CREG1_HUMAN	CREG1	CREG1_HUMAN Protein CREG1	6	2838.28	3049.07	2943.68	2191.18	2265.8	2228.49	0.757043	-0.401552	2641.51	2162.45	2401.98	0.81598	-0.293394	2478.8	2896.38	2687.59	0.913005	-0.131305	2644.53	2018.5	2331.52	0.792042	-0.336351	#N/A	#N/A	#N/A	#N/A	#N/A	#N/A	#N/A	#N/A	#N/A	#N/A	#N/A	#N/A	#N/A						STAR	KCNS3			H1FX
sp|O75533|SF3B1_HUMAN	SF3B1	SF3B1_HUMAN Splicing factor 3B subunit 1	17	2283.83	2468.39	2376.11	1753.59	1845.61	1799.6	0.757372	-0.400925	1975.29	2196.26	2085.78	0.877811	-0.188018	1980.01	2044.03	2012.02	0.846771	-0.239957	2009.4	2090.63	2050.02	0.862761	-0.212967	#N/A	#N/A	#N/A	#N/A	#N/A	#N/A	#N/A	#N/A	#N/A	#N/A	#N/A	#N/A	#N/A						STARD7	KCNT1			H2AB1
sp|Q2TAY7|SMU1_HUMAN	SMU1	SMU1_HUMAN WD40 repeat-containing protein SMU1	8	2239.93	2307.63	2273.78	1607.78	1839.38	1723.58	0.758024	-0.399684	1990.91	2051.13	2021.02	0.888837	-0.170009	1858.54	1924.72	1891.63	0.831932	-0.265463	1490.89	1797.95	1644.42	0.72321	-0.467514	#N/A	#N/A	#N/A	#N/A	#N/A	#N/A	#N/A	#N/A	#N/A	#N/A	#N/A	#N/A	#N/A						STMP1	KCNT2			H2AB2
sp|Q16630-2|CPSF6_HUMAN	CPSF6	CPSF6_HUMAN Isoform 2 of Cleavage and polyadenylation specificity factor subunit 6	4	110.708	110.612	110.66	78.6591	89.1081	83.8836	0.75803	-0.399673	88.5754	115.047	101.811	0.920036	-0.120238	93.5647	95.8861	94.7254	0.856004	-0.224311	94.1442	108.742	101.443	0.91671	-0.125463	#N/A	#N/A	#N/A	#N/A	#N/A	#N/A	#N/A	#N/A	#N/A	#N/A	#N/A	#N/A	#N/A						STYXL1	KCNU1			H2AC11
sp|O00584|RNT2_HUMAN	RNASET2	RNT2_HUMAN Ribonuclease T2	11	3568.91	3575.46	3572.18	2696.36	2722.42	2709.39	0.758469	-0.398839	3246.59	2567.79	2907.19	0.813841	-0.297181	2966.12	3576.49	3271.3	0.915771	-0.126941	2948.59	2292.1	2620.35	0.733541	-0.44705	#N/A	#N/A	#N/A	#N/A	#N/A	#N/A	#N/A	#N/A	#N/A	#N/A	#N/A	#N/A	#N/A						SUCLA2	KCNV1			H2AC14
sp|Q9NQP4|PFD4_HUMAN	PFDN4	PFD4_HUMAN Prefoldin subunit 4	5	777.596	789.418	783.507	567.296	622.149	594.723	0.759052	-0.39773	733.312	712.764	723.038	0.922823	-0.115875	698.57	664.48	681.525	0.869839	-0.20118	615.298	547.379	581.339	0.74197	-0.430568	#N/A	#N/A	#N/A	#N/A	#N/A	#N/A	#N/A	#N/A	#N/A	#N/A	#N/A	#N/A	#N/A						SUCLG1	KCNV2			H2AC4
sp|Q8WWM7-3|ATX2L_HUMAN	ATXN2L	ATX2L_HUMAN Isoform 3 of Ataxin-2-like protein	20	2630.02	2609.24	2619.63	1981.6	2000.23	1990.91	0.759999	-0.395931	2291.8	2231.93	2261.86	0.863429	-0.21185	2298.65	2220.92	2259.78	0.862635	-0.213178	2075.45	2383.33	2229.39	0.851032	-0.232714	#N/A	#N/A	#N/A	#N/A	#N/A	#N/A	#N/A	#N/A	#N/A	#N/A	#N/A	#N/A	#N/A						SUCLG2	KCTD12			H2AC7
sp|Q9NRL3|STRN4_HUMAN	STRN4	STRN4_HUMAN Striatin-4	1	32.2443	29.6009	30.9226	23.7481	23.2754	23.5117	0.760342	-0.39528	24.0352	26.3745	25.2049	0.815095	-0.29496	32.4603	27.7535	30.1069	0.973621	-0.0385675	19.0506	33.8514	26.451	0.855394	-0.225339	#N/A	#N/A	#N/A	#N/A	#N/A	#N/A	#N/A	#N/A	#N/A	#N/A	#N/A	#N/A	#N/A						SUGCT	KCTD16			H2AFJ
sp|Q9Y618|NCOR2_HUMAN	NCOR2	NCOR2_HUMAN Nuclear receptor corepressor 2	11	1770.49	1912.81	1841.65	1418.34	1384.24	1401.29	0.760888	-0.394243	1558.72	1534.62	1546.67	0.839828	-0.251833	1559.67	1307.1	1433.38	0.778316	-0.361573	1324.19	1623.65	1473.92	0.800326	-0.321341	#N/A	#N/A	#N/A	#N/A	#N/A	#N/A	#N/A	#N/A	NCOR2	#N/A	#N/A	#N/A	#N/A						SUOX	KCTD3			H2AFV
sp|O00273|DFFA_HUMAN	DFFA	DFFA_HUMAN DNA fragmentation factor subunit alpha	6	1025.9	1006.99	1016.45	755.943	793.099	774.521	0.76199	-0.392156	873.539	904.905	889.222	0.874835	-0.192917	884.741	801.389	843.065	0.829425	-0.269816	680.995	776.915	728.955	0.717161	-0.47963	#N/A	#N/A	#N/A	#N/A	#N/A	#N/A	#N/A	#N/A	#N/A	DFFA	#N/A	#N/A	#N/A						SURF1	KCTD8			H2AFX
sp|Q96PU8|QKI_HUMAN	QKI	QKI_HUMAN Protein quaking	5	535.539	525.185	530.362	400.697	407.575	404.136	0.762	-0.392137	489.769	484.481	487.125	0.918476	-0.122685	444.115	454.434	449.274	0.847109	-0.23938	397.658	485.189	441.423	0.832306	-0.264814	#N/A	#N/A	#N/A	#N/A	#N/A	#N/A	#N/A	#N/A	#N/A	#N/A	#N/A	#N/A	#N/A						SYNJ2BP	KIR2DL1			H2AFY
sp|Q9BUJ2|HNRL1_HUMAN	HNRNPUL1	HNRL1_HUMAN Heterogeneous nuclear ribonucleoprotein U-like protein 1	11	1781.67	1876.44	1829.06	1344.37	1443.33	1393.85	0.76206	-0.392023	1437.97	1624.62	1531.3	0.837206	-0.256346	1512.29	1439.37	1475.83	0.806881	-0.309572	1367.87	1696.61	1532.24	0.837722	-0.255456	#N/A	#N/A	#N/A	#N/A	#N/A	#N/A	#N/A	#N/A	HNRNPUL1	#N/A	#N/A	#N/A	#N/A						TACO1	KIR2DL2			H2AFY2
sp|Q92878-2|RAD50_HUMAN	RAD50	RAD50_HUMAN Isoform 2 of DNA repair protein RAD50	14	2610.37	2849.34	2729.86	2030.23	2131.87	2081.05	0.76233	-0.391513	2170.96	2274.17	2222.57	0.81417	-0.296599	2086.14	2181.86	2134	0.781727	-0.355264	2052.09	2543.68	2297.89	0.841761	-0.248518	#N/A	#N/A	#N/A	#N/A	#N/A	#N/A	#N/A	#N/A	RAD50	#N/A	#N/A	#N/A	#N/A						TAMM41	KIR2DL3			H2AZ1
sp|O95347|SMC2_HUMAN	SMC2	SMC2_HUMAN Structural maintenance of chromosomes protein 2	6	1002.15	973.486	987.818	761.888	744.28	753.084	0.762371	-0.391434	938.468	992.193	965.331	0.977235	-0.0332223	918.778	909.268	914.023	0.925295	-0.112015	823.759	1134.21	978.985	0.991058	-0.0129592	#N/A	#N/A	#N/A	#N/A	#N/A	#N/A	#N/A	#N/A	#N/A	#N/A	#N/A	#N/A	#N/A						TARS2	KIR2DL5A			H2BC1
sp|Q9UQ13|SHOC2_HUMAN	SHOC2	SHOC2_HUMAN Leucine-rich repeat protein SHOC-2	1	37.7766	45.8533	41.8149	24.6198	39.188	31.9039	0.762978	-0.390286	35.2119	31.2859	33.2489	0.795144	-0.330712	36.043	32.2276	34.1353	0.816342	-0.292754	26.2066	36.0094	31.108	0.743944	-0.426733	#N/A	#N/A	#N/A	#N/A	#N/A	#N/A	#N/A	#N/A	#N/A	#N/A	#N/A	#N/A	#N/A						TBRG4	KIR2DL5B			H2BC11
sp|Q99571|P2RX4_HUMAN	P2RX4	P2RX4_HUMAN P2X purinoceptor 4	1	39.385	34.5928	36.9889	27.8684	28.5908	28.2296	0.763191	-0.389884	32.5695	25.3511	28.9603	0.782946	-0.353016	31.2253	34.0119	32.6186	0.881848	-0.181398	31.7807	43.1323	37.4565	1.01264	0.0181237	#N/A	#N/A	#N/A	#N/A	#N/A	#N/A	#N/A	#N/A	#N/A	#N/A	#N/A	#N/A	#N/A						TCAIM	KIR2DS1			H2BC12
sp|Q6ZVM7|TM1L2_HUMAN	TOM1L2	TM1L2_HUMAN TOM1-like protein 2	1	51.2907	57.2294	54.26	39.5769	43.2508	41.4138	0.763248	-0.389777	54.712	43.205	48.9585	0.902294	-0.148331	58.6324	41.1679	49.9001	0.919648	-0.120846	38.2284	48.4387	43.3336	0.798627	-0.324406	#N/A	#N/A	#N/A	#N/A	#N/A	#N/A	#N/A	#N/A	#N/A	#N/A	#N/A	#N/A	#N/A						TDH	KIR2DS2			H2BC13
sp|Q9Y314|NOSIP_HUMAN	NOSIP	NOSIP_HUMAN Nitric oxide synthase-interacting protein	4	908.742	803.224	855.983	644.932	662.368	653.65	0.763625	-0.389064	714.757	750.1	732.428	0.855658	-0.224894	776.22	734.843	755.532	0.882648	-0.18009	656.99	669.073	663.032	0.774585	-0.368505	#N/A	#N/A	#N/A	#N/A	#N/A	#N/A	#N/A	#N/A	#N/A	#N/A	#N/A	#N/A	#N/A						TEFM	KIR2DS3			H2BC14
sp|P31943|HNRH1_HUMAN	HNRNPH1	HNRH1_HUMAN Heterogeneous nuclear ribonucleoprotein H	11	1593	1608.77	1600.88	1205.96	1239.79	1222.88	0.763874	-0.388593	1252.92	1485.29	1369.11	0.855218	-0.225637	1379.06	1209.76	1294.41	0.808559	-0.306575	1256.54	1517.05	1386.8	0.866268	-0.207115	#N/A	#N/A	#N/A	#N/A	#N/A	#N/A	#N/A	#N/A	HNRNPH1	#N/A	#N/A	#N/A	#N/A						TFAM	KIR2DS4			H2BC15
sp|Q9NXR1|NDE1_HUMAN	NDE1	NDE1_HUMAN Nuclear distribution protein nudE homolog 1	1	25.6945	23.2754	24.485	19.3735	18.0664	18.72	0.764549	-0.387319	20.6257	22.8595	21.7426	0.887999	-0.171371	20.8461	21.0507	20.9484	0.855562	-0.225055	17.5182	16.2462	16.8822	0.689493	-0.536392	#N/A	#N/A	#N/A	#N/A	#N/A	#N/A	#N/A	#N/A	#N/A	#N/A	#N/A	#N/A	#N/A						TFB1M	KIR2DS5			H2BC4
sp|Q6PJT7|ZC3HE_HUMAN	ZC3H14	ZC3HE_HUMAN Zinc finger CCCH domain-containing protein 14	1	37.8982	29.7759	33.8371	23.1999	28.5506	25.8753	0.764702	-0.387031	34.463	38.4983	36.4806	1.07813	0.108528	33.6219	26.4541	30.038	0.887725	-0.171815	29.9764	41.2148	35.5956	1.05197	0.0730951	#N/A	#N/A	#N/A	#N/A	#N/A	#N/A	#N/A	#N/A	#N/A	#N/A	#N/A	#N/A	#N/A						TFB2M	KIR3DL1			H2BFS
sp|Q13243|SRSF5_HUMAN	SRSF5	SRSF5_HUMAN Serine/arginine-rich splicing factor 5	1	346.994	366.115	356.555	272.708	272.644	272.676	0.764753	-0.386935	285.621	349.644	317.632	0.890839	-0.166764	286.711	269.778	278.245	0.78037	-0.357769	269.361	273.576	271.469	0.761366	-0.393338	#N/A	#N/A	#N/A	#N/A	#N/A	#N/A	#N/A	#N/A	SRSF5	#N/A	#N/A	#N/A	#N/A						THEM5	KIR3DL2			H2BFWT
sp|P16333|NCK1_HUMAN	NCK1	NCK1_HUMAN Cytoplasmic protein NCK1	8	1541.84	1572.46	1557.15	1149.71	1232.27	1190.99	0.764852	-0.386747	1317.46	1290.14	1303.8	0.837299	-0.256185	1309.81	1246.94	1278.38	0.820971	-0.284597	1223.12	1040.04	1131.58	0.726699	-0.460569	#N/A	#N/A	#N/A	#N/A	#N/A	#N/A	#N/A	#N/A	#N/A	#N/A	#N/A	#N/A	#N/A						TIMM10	KIR3DL3			H2BW2
sp|Q14195-2|DPYL3_HUMAN	DPYSL3	DPYL3_HUMAN Isoform LCRMP-4 of Dihydropyrimidinase-related protein 3	3	283.054	277.285	280.169	218.211	210.684	214.447	0.765421	-0.385675	213.953	228.665	221.309	0.789911	-0.340238	233.719	213.976	223.847	0.798972	-0.323784	185.607	230.67	208.138	0.742902	-0.428756	#N/A	#N/A	#N/A	#N/A	#N/A	#N/A	#N/A	#N/A	#N/A	#N/A	#N/A	#N/A	#N/A						TIMM10B	KIR3DS1			H3-3A
sp|Q13151|ROA0_HUMAN	HNRNPA0	ROA0_HUMAN Heterogeneous nuclear ribonucleoprotein A0	2	260.605	266.082	263.344	209.786	193.545	201.666	0.765789	-0.384982	172.77	282.393	227.582	0.8642	-0.210563	231.61	206.776	219.193	0.832346	-0.264744	226.811	227.848	227.329	0.863243	-0.212161	#N/A	#N/A	#N/A	#N/A	#N/A	#N/A	#N/A	#N/A	HNRNPA0	#N/A	#N/A	#N/A	#N/A						TIMM13	KIRREL1			H3C1
sp|O15162|PLS1_HUMAN	PLSCR1	PLS1_HUMAN Phospholipid scramblase 1	2	857.456	792.719	825.088	645.579	618.358	631.968	0.765941	-0.384694	864.542	535.737	700.139	0.848564	-0.236905	762.768	891.111	826.939	1.00224	0.00323466	778.7	791.656	785.178	0.95163	-0.0715274	#N/A	#N/A	#N/A	#N/A	#N/A	#N/A	#N/A	#N/A	#N/A	#N/A	#N/A	#N/A	#N/A						TIMM17A	KIRREL2			H3F3C
sp|Q9H2V7|SPNS1_HUMAN	SPNS1	SPNS1_HUMAN Protein spinster homolog 1	15	5452.57	6063.14	5757.85	4437.5	4383.23	4410.36	0.765974	-0.384633	5042.83	3919.53	4481.18	0.778272	-0.361653	4206.98	5093.47	4650.23	0.807631	-0.308231	3935.7	4819.06	4377.38	0.760245	-0.395464	#N/A	#N/A	#N/A	#N/A	SPNS1	#N/A	#N/A	#N/A	#N/A	#N/A	#N/A	#N/A	#N/A						TIMM17B	KISS1R			H4C1
sp|O43294|TGFI1_HUMAN	TGFB1I1	TGFI1_HUMAN Transforming growth factor beta-1-induced transcript 1 protein	2	351.938	304.352	328.145	250.438	252.514	251.476	0.766356	-0.383913	318.831	305.986	312.409	0.952044	-0.0708997	286.004	264.231	275.118	0.838402	-0.254286	224.976	266.622	245.799	0.749056	-0.416854	#N/A	#N/A	#N/A	#N/A	#N/A	#N/A	#N/A	#N/A	#N/A	#N/A	#N/A	#N/A	#N/A						TIMM21	KLB			HAND1
sp|Q86VM9|ZCH18_HUMAN	ZC3H18	ZCH18_HUMAN Zinc finger CCCH domain-containing protein 18	1	194.282	193.516	193.899	140.783	156.445	148.614	0.766451	-0.383735	147.708	204.227	175.968	0.907521	-0.139996	148.526	139.6	144.063	0.74298	-0.428606	175.385	194.22	184.803	0.953086	-0.0693211	#N/A	#N/A	#N/A	#N/A	#N/A	#N/A	#N/A	#N/A	ZC3H18	#N/A	#N/A	#N/A	#N/A						TIMM22	KLRD1			HAND2
sp|Q9NWV8|BABA1_HUMAN	BABAM1	BABA1_HUMAN BRISC and BRCA1-A complex member 1	1	85.5097	70.029	77.7694	58.9519	60.2667	59.6093	0.766488	-0.383664	69.9425	75.8664	72.9044	0.937445	-0.0931948	57.9099	57.4919	57.7009	0.741949	-0.430608	59.7525	86.5432	73.1479	0.940574	-0.0883862	#N/A	#N/A	#N/A	#N/A	#N/A	#N/A	#N/A	#N/A	#N/A	#N/A	#N/A	#N/A	#N/A						TIMM23	KLRF2			HBP1
sp|O43684|BUB3_HUMAN	BUB3	BUB3_HUMAN Mitotic checkpoint protein BUB3	7	2150.9	2140.9	2145.9	1558.64	1731.87	1645.26	0.766697	-0.383272	1873.68	2041.85	1957.76	0.912328	-0.132375	1875.65	1826.89	1851.27	0.862701	-0.213068	1717.34	1837.28	1777.31	0.828235	-0.271888	#N/A	#N/A	#N/A	#N/A	#N/A	#N/A	#N/A	#N/A	BUB3	#N/A	#N/A	#N/A	#N/A						TIMM23B	KLRG1			HDAC1
sp|Q14814|MEF2D_HUMAN	MEF2D	MEF2D_HUMAN Myocyte-specific enhancer factor 2D	1	67.2647	58.6462	62.9554	48.2377	48.3103	48.274	0.766796	-0.383085	54.7542	57.3482	56.0512	0.890331	-0.167586	56.5919	47.7502	52.1711	0.828698	-0.271082	43.2498	59.8849	51.5674	0.819109	-0.287873	#N/A	#N/A	#N/A	#N/A	#N/A	#N/A	#N/A	#N/A	MEF2D	#N/A	#N/A	#N/A	#N/A						TIMM29	KLRK1			HDAC11
sp|P50502|F10A1_HUMAN	ST13	F10A1_HUMAN Hsc70-interacting protein	11	2585.94	2416.95	2501.44	1805.52	2032.57	1919.05	0.767175	-0.382373	2264.41	2243.63	2254.02	0.901087	-0.150261	2229.76	2185.93	2207.85	0.882628	-0.180123	2081.62	1946.63	2014.12	0.805185	-0.312609	#N/A	#N/A	#N/A	#N/A	#N/A	#N/A	#N/A	#N/A	#N/A	ST13	#N/A	#N/A	#N/A						TIMM44	KREMEN1			HDAC9
sp|P31942|HNRH3_HUMAN	HNRNPH3	HNRH3_HUMAN Heterogeneous nuclear ribonucleoprotein H3	16	2564.87	2730.96	2647.91	2048.69	2016.04	2032.37	0.767534	-0.381697	1910.59	2317.24	2113.91	0.798332	-0.324939	2107.63	1943.89	2025.76	0.76504	-0.386394	2064.16	2533.92	2299.04	0.868245	-0.203825	#N/A	#N/A	#N/A	#N/A	#N/A	#N/A	#N/A	#N/A	HNRNPH3	#N/A	#N/A	#N/A	#N/A						TIMM8A	KRT1			HDGFL2
sp|Q13492|PICAL_HUMAN	PICALM	PICAL_HUMAN Phosphatidylinositol-binding clathrin assembly protein	11	2179.35	1993.54	2086.44	1562.45	1641.34	1601.89	0.767763	-0.381267	1882.44	1744.07	1813.26	0.869064	-0.202465	1731.71	1621.18	1676.45	0.803494	-0.315642	1512.85	1395.94	1454.39	0.697068	-0.520628	#N/A	#N/A	#N/A	#N/A	#N/A	#N/A	#N/A	#N/A	#N/A	#N/A	#N/A	#N/A	#N/A						TIMM8B	L1CAM			HDGFL3
sp|O43719|HTSF1_HUMAN	HTATSF1	HTSF1_HUMAN HIV Tat-specific factor 1	5	681.917	756.136	719.026	550.791	553.315	552.053	0.767778	-0.381238	562.785	656.873	609.829	0.848131	-0.23764	557.041	569.687	563.364	0.783509	-0.351978	568.235	732.53	650.382	0.904532	-0.144757	#N/A	#N/A	#N/A	#N/A	#N/A	#N/A	#N/A	#N/A	HTATSF1	#N/A	#N/A	#N/A	#N/A						TIMM9	LAIR1			HDX
sp|P40222|TXLNA_HUMAN	TXLNA	TXLNA_HUMAN Alpha-taxilin	3	173.019	187.115	180.067	141.944	134.656	138.3	0.768047	-0.380733	140.387	154.486	147.436	0.818787	-0.28844	144.328	169.6	156.964	0.871698	-0.1981	132.376	143.777	138.077	0.766806	-0.383066	#N/A	#N/A	#N/A	#N/A	#N/A	#N/A	#N/A	#N/A	#N/A	#N/A	#N/A	#N/A	#N/A						TIMMDC1	LAT			HEATR1
sp|Q5T1J5|CHCH9_HUMAN	CHCHD2P9	CHCH9_HUMAN Putative coiled-coil-helix-coiled-coil-helix domain-containing protein CHCHD2P9, mitochondrial	3	251.085	277.134	264.11	185.297	220.464	202.88	0.768168	-0.380506	222.718	225.224	223.971	0.848023	-0.237824	227.637	233.978	230.808	0.873908	-0.194446	259.105	260.55	259.827	0.983787	-0.0235821	#N/A	#N/A	#N/A	#N/A	CHCHD2P9	#N/A	#N/A	#N/A	#N/A	#N/A	#N/A	#N/A	#N/A						TK2	LAT2			HELLS
sp|O15431|COPT1_HUMAN	SLC31A1	COPT1_HUMAN High affinity copper uptake protein 1	14	2213.06	2577.57	2395.32	1744.6	1935.83	1840.21	0.768256	-0.380341	2157.34	1492.47	1824.91	0.761864	-0.392394	1695.38	1671.28	1683.33	0.702759	-0.508897	1845.56	2382.7	2114.13	0.88261	-0.180151	#N/A	#N/A	#N/A	#N/A	#N/A	SLC31A1	#N/A	#N/A	#N/A	#N/A	#N/A	#N/A	#N/A						TMEM11	LAX1			HELT
sp|Q96KR1|ZFR_HUMAN	ZFR	ZFR_HUMAN Zinc finger RNA-binding protein	3	296.674	270.789	283.731	202.552	233.438	217.995	0.768314	-0.380231	239.253	258.263	248.758	0.876737	-0.189783	232.831	229.771	231.301	0.815211	-0.294755	241.474	276.524	258.999	0.912831	-0.13158	#N/A	#N/A	#N/A	#N/A	#N/A	#N/A	#N/A	#N/A	#N/A	#N/A	#N/A	#N/A	#N/A						TMEM126A	LCT			HELZ
sp|Q494V2-2|CCD37_HUMAN	CCDC37	CCD37_HUMAN Isoform 2 of Coiled-coil domain-containing protein 37	2	674.031	690.217	682.124	514.249	535.392	524.821	0.769392	-0.37821	649.433	447.813	548.623	0.804286	-0.314219	667.633	740.138	703.886	1.0319	0.0453067	651.118	714.507	682.812	1.00101	0.00145545	#N/A	#N/A	#N/A	#N/A	#N/A	#N/A	#N/A	#N/A	#N/A	#N/A	#N/A	#N/A	#N/A						TMEM126B	LDLRAD3			HELZ2
sp|Q8WWI1|LMO7_HUMAN	LMO7	LMO7_HUMAN LIM domain only protein 7	10	1302.12	1280.1	1291.11	957.932	1029.59	993.761	0.769695	-0.377641	1001.6	1053.71	1027.65	0.795947	-0.329256	1141.29	1031.17	1086.23	0.841315	-0.249282	1074.71	1364.32	1219.51	0.944548	-0.0823044	#N/A	#N/A	#N/A	#N/A	#N/A	#N/A	#N/A	#N/A	#N/A	#N/A	#N/A	#N/A	#N/A						TMEM14C	LGR4			HEMGN
sp|P0CG48|UBC_HUMAN	UBC	UBC_HUMAN Polyubiquitin-C	23	8487.77	9466.12	8976.94	6551.94	7270.77	6911.35	0.769901	-0.377256	7789.73	7278.18	7533.95	0.839256	-0.252817	8276.94	9211.78	8744.36	0.974091	-0.0378718	7537.49	12209.8	9873.65	1.09989	0.137358	#N/A	#N/A	#N/A	#N/A	#N/A	#N/A	#N/A	#N/A	#N/A	#N/A	#N/A	#N/A	#N/A						TMEM177	LGR6			HES1
sp|P61073-2|CXCR4_HUMAN	CXCR4	CXCR4_HUMAN Isoform 2 of C-X-C chemokine receptor type 4	4	1556.55	1835.38	1695.97	1322.61	1289.31	1305.96	0.770039	-0.376996	1640.31	1311.29	1475.8	0.870183	-0.200609	1516.13	1793.06	1654.6	0.975607	-0.0356283	1607.01	2758.81	2182.91	1.28712	0.364146	#N/A	#N/A	#N/A	#N/A	#N/A	#N/A	#N/A	#N/A	#N/A	#N/A	#N/A	#N/A	#N/A						TMEM70	LHCGR			HES2
sp|Q9Y5B9|SP16H_HUMAN	SUPT16H	SP16H_HUMAN FACT complex subunit SPT16	2	114.248	108.018	111.133	89.1331	82.0908	85.612	0.770356	-0.376403	96.0018	96.7078	96.3548	0.867022	-0.205859	98.9607	96.0001	97.4804	0.877151	-0.189103	74.1284	123.837	98.9827	0.890669	-0.167039	#N/A	#N/A	#N/A	#N/A	#N/A	#N/A	#N/A	#N/A	SUPT16H	#N/A	#N/A	#N/A	#N/A						TMLHE	LHFPL4			HES3
sp|Q9Y383|LC7L2_HUMAN	LUC7L2	LC7L2_HUMAN Putative RNA-binding protein Luc7-like 2	16	5448.64	5415.56	5432.1	4028.06	4346.02	4187.04	0.770796	-0.375579	4581.05	5442.77	5011.91	0.922647	-0.11615	4288.41	4259.2	4273.81	0.786768	-0.345989	4306.99	4940.4	4623.69	0.85118	-0.232464	#N/A	#N/A	#N/A	#N/A	#N/A	#N/A	#N/A	#N/A	LUC7L2	#N/A	#N/A	#N/A	#N/A						TOMM20	LHFPL5			HES4
sp|Q86U44|MTA70_HUMAN	METTL3	MTA70_HUMAN N6-adenosine-methyltransferase 70 kDa subunit	1	136.275	132.246	134.261	93.4363	113.612	103.524	0.771069	-0.375068	140.243	142.786	141.514	1.05403	0.075915	132.345	87.8947	110.12	0.820195	-0.28596	96.9598	88.5054	92.7326	0.690692	-0.533886	#N/A	#N/A	#N/A	#N/A	#N/A	#N/A	#N/A	#N/A	#N/A	#N/A	#N/A	#N/A	#N/A						TOMM20L	LILRA4			HES5
sp|Q16555|DPYL2_HUMAN	DPYSL2	DPYL2_HUMAN Dihydropyrimidinase-related protein 2	19	3893.95	3854.43	3874.19	3164.28	2815.91	2990.1	0.771799	-0.373703	2828.65	3294.99	3061.82	0.790312	-0.339505	3123.34	2925.26	3024.3	0.780628	-0.357293	2602.25	3083.79	2843.02	0.733836	-0.44647	#N/A	#N/A	#N/A	#N/A	#N/A	#N/A	#N/A	#N/A	#N/A	#N/A	#N/A	#N/A	#N/A						TOMM22	LILRB2			HES6
sp|Q96CB8|INT12_HUMAN	INTS12	INT12_HUMAN Integrator complex subunit 12	2	77.6589	77.9496	77.8042	63.9412	56.1881	60.0647	0.771997	-0.373333	66.6143	89.3514	77.9828	1.0023	0.00330792	82.8868	72.4929	77.6899	0.99853	-0.00212284	68.0697	38.2418	53.1557	0.683199	-0.549623	#N/A	#N/A	#N/A	#N/A	#N/A	#N/A	#N/A	#N/A	INTS12	#N/A	#N/A	#N/A	#N/A						TOMM40	LILRB3			HES7
sp|Q13573|SNW1_HUMAN	SNW1	SNW1_HUMAN SNW domain-containing protein 1	7	959.676	923.675	941.676	672.084	782.756	727.42	0.772474	-0.372441	794.706	802.668	798.687	0.848155	-0.2376	898.678	797.393	848.035	0.90056	-0.151105	772.01	880.479	826.245	0.87742	-0.188661	#N/A	#N/A	#N/A	#N/A	#N/A	#N/A	#N/A	#N/A	SNW1	#N/A	#N/A	#N/A	#N/A						TOMM40L	LILRB4			HESX1
sp|Q6UWY0|ARSK_HUMAN	ARSK	ARSK_HUMAN Arylsulfatase K	15	5393.17	5514.26	5453.72	4171.86	4255	4213.43	0.77258	-0.372244	4630.03	4030.82	4330.43	0.794032	-0.332731	4423.39	5221.36	4822.38	0.884237	-0.177495	4712.63	4407.06	4559.85	0.836099	-0.258255	#N/A	#N/A	#N/A	#N/A	#N/A	#N/A	#N/A	#N/A	#N/A	#N/A	#N/A	#N/A	#N/A						TOMM5	LIME1			HEXIM2
sp|Q00535|CDK5_HUMAN	CDK5	CDK5_HUMAN Cyclin-dependent kinase 5	1	38.9931	35.8354	37.4142	31.7673	26.0516	28.9094	0.772686	-0.372047	30.9096	28.7636	29.8366	0.797466	-0.326505	29.9787	31.9762	30.9774	0.827959	-0.272369	31.3199	34.4145	32.8672	0.878467	-0.186939	#N/A	#N/A	#N/A	#N/A	#N/A	#N/A	#N/A	#N/A	#N/A	#N/A	#N/A	#N/A	#N/A						TOMM6	LIN7A			HEY1
sp|O14974|MYPT1_HUMAN	PPP1R12A	MYPT1_HUMAN Protein phosphatase 1 regulatory subunit 12A	6	528.002	571.616	549.809	418.387	431.289	424.838	0.772701	-0.372018	454.346	498.794	476.57	0.866792	-0.206242	490.662	470.99	480.826	0.874533	-0.193416	436.866	540.151	488.508	0.888506	-0.170547	#N/A	#N/A	#N/A	#N/A	#N/A	#N/A	#N/A	#N/A	#N/A	#N/A	#N/A	#N/A	#N/A						TOMM7	LIN7B			HEY2
sp|P42025|ACTY_HUMAN	ACTR1B	ACTY_HUMAN Beta-centractin	1	21.3128	21.0605	21.1867	14.6699	18.0758	16.3728	0.772791	-0.37185	19.3783	23.1413	21.2598	1.00345	0.00497254	24.1807	21.2081	22.6944	1.07117	0.0991809	13.9005	15.6199	14.7602	0.696675	-0.521443	#N/A	#N/A	#N/A	#N/A	#N/A	#N/A	#N/A	#N/A	#N/A	#N/A	#N/A	#N/A	#N/A						TOMM70	LIN7C			HEYL
sp|P28074|PSB5_HUMAN	PSMB5	PSB5_HUMAN Proteasome subunit beta type-5	8	1130.86	1193.84	1162.35	891.361	906.086	898.724	0.773195	-0.371095	981.417	1141.71	1061.56	0.913291	-0.130854	1043.52	1000.52	1022.02	0.87927	-0.185621	891.424	1128.11	1009.77	0.868729	-0.203022	#N/A	#N/A	#N/A	#N/A	#N/A	#N/A	#N/A	#N/A	#N/A	#N/A	#N/A	#N/A	#N/A						TOP1MT	LINGO1			HHEX
sp|Q14849-3|STAR3_HUMAN	STARD3	STAR3_HUMAN Isoform 3 of StAR-related lipid transfer protein 3	5	1250.43	1356.62	1303.53	991.826	1024.18	1008	0.77329	-0.370918	992.241	807.409	899.825	0.690301	-0.534702	911.615	1006.58	959.098	0.735772	-0.442669	920.233	1023.31	971.771	0.745495	-0.423729	#N/A	#N/A	#N/A	#N/A	#N/A	#N/A	#N/A	#N/A	#N/A	#N/A	#N/A	#N/A	#N/A						TOP3A	LMBRD2			HIC1
sp|P41567|EIF1_HUMAN	EIF1	EIF1_HUMAN Eukaryotic translation initiation factor 1	5	1712.64	1636.07	1674.36	1222.56	1368.32	1295.44	0.773695	-0.370163	1429.51	1666.44	1547.97	0.92452	-0.113223	1418.36	1340.25	1379.3	0.823783	-0.279664	1219.08	1438.42	1328.75	0.793589	-0.333536	#N/A	#N/A	#N/A	#N/A	#N/A	#N/A	#N/A	#N/A	#N/A	#N/A	#N/A	#N/A	#N/A						TP53AIP1	LPAR2			HIC2
sp|O15294|OGT1_HUMAN	OGT	OGT1_HUMAN UDP-N-acetylglucosamine--peptide N-acetylglucosaminyltransferase 110 kDa subunit	1	73.1873	91.4311	82.3092	63.836	63.6502	63.7431	0.774435	-0.368785	67.9398	73.2992	70.6195	0.857978	-0.220987	64.731	57.1996	60.9653	0.740686	-0.433065	62.1337	74.3936	68.2636	0.829356	-0.269936	#N/A	#N/A	#N/A	#N/A	#N/A	#N/A	#N/A	#N/A	#N/A	#N/A	#N/A	#N/A	#N/A						TRAP1	LPAR3			HILS1
sp|O75150|BRE1B_HUMAN	RNF40	BRE1B_HUMAN E3 ubiquitin-protein ligase BRE1B	8	969.849	886.584	928.216	716.851	721.031	718.941	0.77454	-0.368588	842.843	783.191	813.017	0.875892	-0.191176	791.044	762.544	776.794	0.836867	-0.256929	611.456	726.501	668.978	0.720714	-0.472501	#N/A	#N/A	#N/A	#N/A	#N/A	#N/A	#N/A	#N/A	RNF40	#N/A	#N/A	#N/A	#N/A						TRIM14	LPAR4			HINFP
sp|P35237|SPB6_HUMAN	SERPINB6	SPB6_HUMAN Serpin B6	32	6377.61	7038.38	6707.99	5153.58	5238.79	5196.18	0.774626	-0.368429	6111.68	4892.86	5502.27	0.820256	-0.285855	5930.35	6497.26	6213.81	0.926328	-0.110405	5353.83	5786.43	5570.13	0.830372	-0.268171	#N/A	#N/A	#N/A	#N/A	#N/A	#N/A	#N/A	#N/A	#N/A	SERPINB6	#N/A	#N/A	#N/A						TRMT10C	LPAR5			HIRA
sp|O60884|DNJA2_HUMAN	DNAJA2	DNJA2_HUMAN DnaJ homolog subfamily A member 2	15	7001.75	7417.88	7209.82	5644.77	5527.57	5586.17	0.774801	-0.368103	5738.04	6242.51	5990.27	0.83085	-0.26734	5767.22	5337.09	5552.16	0.770083	-0.376914	4893.1	6599.04	5746.07	0.796979	-0.327387	#N/A	#N/A	#N/A	#N/A	#N/A	#N/A	#N/A	#N/A	#N/A	#N/A	#N/A	#N/A	#N/A						TRMT61B	LPAR6			HIRIP3
sp|Q1KMD3|HNRL2_HUMAN	HNRNPUL2	HNRL2_HUMAN Heterogeneous nuclear ribonucleoprotein U-like protein 2	1	78.8665	81.7507	80.3086	61.3742	63.0895	62.2319	0.774909	-0.367901	65.8528	83.7876	74.8202	0.931659	-0.102127	78.6106	69.3925	74.0016	0.921465	-0.117999	79.7677	90.6239	85.1958	1.06086	0.0852278	#N/A	#N/A	#N/A	#N/A	#N/A	#N/A	#N/A	#N/A	HNRNPUL2	#N/A	#N/A	#N/A	#N/A						TRMU	LRFN1			HIST1H1T
sp|Q9UQ35|SRRM2_HUMAN	SRRM2	SRRM2_HUMAN Serine/arginine repetitive matrix protein 2	17	1832.43	1930.59	1881.51	1352.29	1564.53	1458.41	0.775127	-0.367495	1673.35	1911	1792.17	0.95252	-0.0701794	1704.69	1611.85	1658.27	0.881351	-0.182212	1718.61	1894	1806.3	0.960029	-0.0588494	#N/A	#N/A	#N/A	#N/A	#N/A	#N/A	#N/A	#N/A	SRRM2	#N/A	#N/A	#N/A	#N/A						TRNT1	LRFN2			HIST1H2AA
sp|Q8IU81|I2BP1_HUMAN	IRF2BP1	I2BP1_HUMAN Interferon regulatory factor 2-binding protein 1	9	696.114	652.912	674.513	514.953	531.071	523.012	0.775392	-0.367002	649.791	579.859	614.825	0.911509	-0.13367	613.504	541.626	577.565	0.85627	-0.223863	430.339	492.26	461.299	0.6839	-0.548143	#N/A	#N/A	#N/A	#N/A	#N/A	#N/A	#N/A	#N/A	IRF2BP1	#N/A	#N/A	#N/A	#N/A						TRUB2	LRFN3			HIST1H2AC
sp|Q8NC51|PAIRB_HUMAN	SERBP1	PAIRB_HUMAN Plasminogen activator inhibitor 1 RNA-binding protein	25	7256.57	6607.34	6931.95	5412.65	5341.75	5377.2	0.775712	-0.366407	5198.5	6366.91	5782.7	0.83421	-0.261518	5447.94	5151.42	5299.68	0.764529	-0.387357	4792.58	5656.1	5224.34	0.75366	-0.408013	#N/A	#N/A	#N/A	#N/A	#N/A	#N/A	#N/A	#N/A	#N/A	#N/A	#N/A	#N/A	#N/A						TSFM	LRIG1			HIST1H2AH
sp|Q6UXD5-5|SE6L2_HUMAN	SEZ6L2	SE6L2_HUMAN Isoform 5 of Seizure 6-like protein 2	6	261.957	279.568	270.762	205.438	215.242	210.34	0.776843	-0.364305	258.638	199.014	228.826	0.845117	-0.242777	281.248	301.228	291.238	1.07562	0.105171	270.885	323.599	297.242	1.0978	0.13461	#N/A	#N/A	#N/A	#N/A	#N/A	#N/A	#N/A	#N/A	#N/A	#N/A	#N/A	#N/A	#N/A						TSPO	LRP4			HIST1H2BB
sp|Q8ND25-2|ZNRF1_HUMAN	ZNRF1	ZNRF1_HUMAN Isoform 2 of E3 ubiquitin-protein ligase ZNRF1	1	113.795	115.173	114.484	84.1618	93.8894	89.0256	0.777625	-0.362854	90.0101	95.504	92.757	0.810218	-0.303617	98.2688	87.33	92.7994	0.810588	-0.302959	88.3511	114.286	101.319	0.885002	-0.176248	#N/A	#N/A	#N/A	#N/A	#N/A	#N/A	#N/A	#N/A	#N/A	#N/A	#N/A	#N/A	#N/A						TST	LRRC32			HIST1H2BD
sp|Q08380|LG3BP_HUMAN	LGALS3BP	LG3BP_HUMAN Galectin-3-binding protein	32	8206.6	8673.67	8440.14	6348.04	6779.11	6563.57	0.777662	-0.362784	7262.46	6975.23	7118.84	0.843452	-0.245623	6852.55	7579.13	7215.84	0.854944	-0.226099	7532.23	8427.87	7980.05	0.945488	-0.0808683	#N/A	#N/A	#N/A	#N/A	#N/A	#N/A	#N/A	#N/A	#N/A	#N/A	#N/A	#N/A	#N/A						TTC19	LRRC38			HIST1H2BH
sp|P06748|NPM_HUMAN	NPM1	NPM_HUMAN Nucleophosmin	27	9117.08	8461.02	8789.05	6638.43	7038.07	6838.25	0.778042	-0.36208	7321.75	8694.44	8008.1	0.911145	-0.134248	6968.27	6660.93	6814.6	0.775351	-0.367078	6697.4	6902.74	6800.07	0.773698	-0.370158	#N/A	#N/A	#N/A	#N/A	#N/A	#N/A	#N/A	#N/A	#N/A	#N/A	#N/A	#N/A	#N/A						TUFM	LRRC4			HIST1H2BO
sp|Q07666|KHDR1_HUMAN	KHDRBS1	KHDR1_HUMAN KH domain-containing, RNA-binding, signal transduction-associated protein 1	1	121.537	98.3171	109.927	84.3652	86.752	85.5586	0.778322	-0.361562	86.032	114.607	100.32	0.912601	-0.131944	89.6139	89.1016	89.3578	0.812882	-0.298882	92.8493	78.3624	85.6059	0.778751	-0.360765	#N/A	#N/A	#N/A	#N/A	#N/A	#N/A	#N/A	#N/A	#N/A	#N/A	#N/A	#N/A	#N/A						TWNK	LRRC4B			HIST1H4G
sp|P31689|DNJA1_HUMAN	DNAJA1	DNJA1_HUMAN DnaJ homolog subfamily A member 1	35	14432.8	14624.2	14528.5	11134.3	11485.5	11309.9	0.778463	-0.3613	11845.5	12319.9	12082.7	0.831655	-0.265943	11923	11066.6	11494.8	0.79119	-0.337904	9752.24	12958	11355.1	0.781576	-0.355543	#N/A	#N/A	#N/A	#N/A	#N/A	#N/A	#N/A	#N/A	#N/A	#N/A	#N/A	#N/A	#N/A						TXN2	LRRC4C			HIST2H2AA3
sp|Q9NQS1|AVEN_HUMAN	AVEN	AVEN_HUMAN Cell death regulator Aven	1	113.978	115.371	114.674	85.3589	93.245	89.302	0.778743	-0.360781	121.548	130.684	126.116	1.09977	0.137207	98.1169	105.9	102.008	0.889548	-0.168856	82.9937	117.237	100.115	0.873039	-0.195881	#N/A	#N/A	#N/A	#N/A	#N/A	#N/A	#N/A	#N/A	#N/A	#N/A	#N/A	#N/A	#N/A						TXNRD2	LRRC52			HIST2H2AB
sp|Q9H2J7|S6A15_HUMAN	SLC6A15	S6A15_HUMAN Sodium-dependent neutral amino acid transporter B(0)AT2	5	448.443	571.028	509.736	414.872	379.498	397.185	0.779198	-0.359938	416.623	397.566	407.094	0.798639	-0.324385	443.567	389.884	416.726	0.817533	-0.290651	473.479	894.554	684.016	1.3419	0.424282	#N/A	#N/A	#N/A	#N/A	#N/A	#N/A	#N/A	#N/A	#N/A	#N/A	#N/A	#N/A	#N/A						UCP1	LRRC55			HIST2H2AC
sp|Q9C0H2-4|TTYH3_HUMAN	TTYH3	TTYH3_HUMAN Isoform 4 of Protein tweety homolog 3	1	152.076	174.039	163.058	123.976	130.133	127.055	0.779201	-0.359933	134.617	107.17	120.893	0.741416	-0.431644	125.324	164.303	144.814	0.888113	-0.171185	132.284	134.709	133.496	0.818708	-0.288579	#N/A	#N/A	#N/A	#N/A	#N/A	TTYH3	#N/A	#N/A	#N/A	#N/A	#N/A	#N/A	#N/A						UCP2	LRRTM1			HIST2H2BC
sp|O60573|IF4E2_HUMAN	EIF4E2	IF4E2_HUMAN Eukaryotic translation initiation factor 4E type 2	12	2485.86	2413.36	2449.61	1807.64	2010.05	1908.85	0.779244	-0.359852	2404.86	2306.89	2355.88	0.961735	-0.0562891	2149.5	2178.63	2164.07	0.883432	-0.178808	1837.22	2227.91	2032.57	0.82975	-0.269251	#N/A	#N/A	#N/A	#N/A	#N/A	#N/A	#N/A	#N/A	#N/A	#N/A	#N/A	#N/A	#N/A						UCP3	LRRTM2			HIST2H2BD
sp|Q8TB72|PUM2_HUMAN	PUM2	PUM2_HUMAN Pumilio homolog 2	1	67.4638	79.1015	73.2827	58.1721	56.0588	57.1154	0.779386	-0.359591	70.1499	67.5978	68.8739	0.939838	-0.0895153	62.7021	53.7594	58.2308	0.794605	-0.33169	54.9346	65.5282	60.2314	0.821905	-0.282956	#N/A	#N/A	#N/A	#N/A	#N/A	#N/A	#N/A	#N/A	#N/A	#N/A	#N/A	#N/A	#N/A						UQCC1	LRRTM3			HIST2H2BE
sp|Q9BS40|LXN_HUMAN	LXN	LXN_HUMAN Latexin	1	30.3991	36.354	33.3766	27.9317	24.1384	26.035	0.78004	-0.35838	30.5408	37.4674	34.0041	1.0188	0.0268739	30.2197	32.9733	31.5965	0.946668	-0.0790701	27.9222	30.2609	29.0915	0.871616	-0.198235	#N/A	#N/A	#N/A	#N/A	#N/A	#N/A	#N/A	#N/A	#N/A	LXN	#N/A	#N/A	#N/A						UQCC2	LRRTM4			HIST2H2BF
sp|P08651|NFIC_HUMAN	NFIC	NFIC_HUMAN Nuclear factor 1 C-type	3	1070.5	1030.45	1050.47	740.448	898.513	819.481	0.780105	-0.35826	919.44	960.697	940.069	0.894898	-0.160204	881.97	870.593	876.282	0.834176	-0.261576	726.081	855.49	790.785	0.752789	-0.409684	#N/A	#N/A	#N/A	#N/A	#N/A	#N/A	#N/A	#N/A	NFIC	#N/A	#N/A	#N/A	#N/A						UQCC3	LSAMP			HIST2H3A
sp|P29762|RABP1_HUMAN	CRABP1	RABP1_HUMAN Cellular retinoic acid-binding protein 1	10	1604.42	1735.9	1670.16	1376.12	1230.12	1303.12	0.780237	-0.358016	1201.54	1464.41	1332.97	0.798112	-0.325337	1699.35	1357.66	1528.51	0.915185	-0.127865	1194.85	1489.27	1342.06	0.803552	-0.315537	#N/A	#N/A	#N/A	#N/A	#N/A	#N/A	#N/A	#N/A	#N/A	CRABP1	#N/A	#N/A	#N/A						UQCR10	LSR			HIST3H2A
sp|P23381|SYWC_HUMAN	WARS	SYWC_HUMAN Tryptophan--tRNA ligase, cytoplasmic	5	1005.84	902.911	954.375	723.021	766.426	744.724	0.780325	-0.357852	886.57	917.286	901.928	0.945045	-0.0815447	898.581	859.448	879.014	0.921036	-0.11867	649.082	737.816	693.449	0.7266	-0.460767	#N/A	#N/A	#N/A	#N/A	#N/A	#N/A	#N/A	#N/A	#N/A	#N/A	#N/A	#N/A	#N/A						UQCR11	LTB4R			HIST3H2BB
tr|K7ES63|K7ES63_HUMAN	TUBB6	K7ES63_HUMAN Tubulin beta-6 chain (Fragment)	1	216.49	246.923	231.707	184.516	177.116	180.816	0.780367	-0.357776	209.447	229.099	219.273	0.946339	-0.0795703	187.421	186.387	186.904	0.806641	-0.310001	139.068	320.04	229.554	0.99071	-0.0134649	#N/A	#N/A	#N/A	#N/A	#N/A	#N/A	#N/A	#N/A	#N/A	#N/A	#N/A	#N/A	#N/A						UQCRB	LTB4R2			HIST3H3
sp|Q9BVA1|TBB2B_HUMAN	TUBB2B	TBB2B_HUMAN Tubulin beta-2B chain	18	6072.55	6220.25	6146.4	4916.33	4676.95	4796.64	0.780398	-0.357717	5632.83	5531.46	5582.15	0.908197	-0.138922	5232.25	4911.53	5071.89	0.825181	-0.277218	3756.91	5687.82	4722.36	0.768314	-0.380232	#N/A	#N/A	#N/A	#N/A	#N/A	#N/A	#N/A	#N/A	#N/A	#N/A	#N/A	#N/A	#N/A						UQCRC1	LY6D			HIVEP2
sp|Q9BQ67|GRWD1_HUMAN	GRWD1	GRWD1_HUMAN Glutamate-rich WD repeat-containing protein 1	2	132.93	146.964	139.947	114.935	103.523	109.229	0.780503	-0.357525	113.505	136.065	124.785	0.891659	-0.165436	122.483	117.252	119.868	0.856521	-0.22344	110.768	145.239	128.004	0.914657	-0.128697	#N/A	#N/A	#N/A	#N/A	#N/A	#N/A	#N/A	#N/A	GRWD1	#N/A	#N/A	#N/A	#N/A						UQCRC2	LY6E			HJURP
sp|Q7RTV5|AAED1_HUMAN	AAED1	AAED1_HUMAN Thioredoxin-like protein AAED1	1	268.823	236.697	252.76	186.858	207.944	197.401	0.780982	-0.356639	239.342	207.096	223.219	0.883126	-0.179308	192.744	188.82	190.782	0.754795	-0.405843	166.775	162.463	164.619	0.651286	-0.618637	#N/A	#N/A	#N/A	#N/A	#N/A	#N/A	#N/A	#N/A	#N/A	#N/A	#N/A	#N/A	#N/A						UQCRFS1	LY6G6C			HLF
sp|Q9NVA2-2|SEP11_HUMAN	SEPT11	SEP11_HUMAN Isoform 2 of Septin-11	3	942.112	879.981	911.046	715.143	708.331	711.737	0.78123	-0.35618	683.371	750.167	716.769	0.786753	-0.346016	850.549	749.947	800.248	0.878383	-0.187078	701.107	616.038	658.572	0.722875	-0.468182	#N/A	#N/A	#N/A	#N/A	#N/A	#N/A	#N/A	#N/A	#N/A	#N/A	#N/A	#N/A	#N/A						UQCRH	LY6G6D			HLX
sp|Q6P1N0|C2D1A_HUMAN	CC2D1A	C2D1A_HUMAN Coiled-coil and C2 domain-containing protein 1A	4	227.997	210.883	219.44	151.363	191.594	171.478	0.781437	-0.355799	204.354	197.616	200.985	0.9159	-0.126739	219.611	206.869	213.24	0.971746	-0.0413484	189.546	205.08	197.313	0.899166	-0.153341	#N/A	#N/A	#N/A	#N/A	#N/A	#N/A	#N/A	#N/A	#N/A	#N/A	#N/A	#N/A	#N/A						UQCRHL	LY6G6F			HMG20A
sp|Q00587|BORG5_HUMAN	CDC42EP1	BORG5_HUMAN Cdc42 effector protein 1	7	1325.48	1201.19	1263.34	953.446	1021.42	987.433	0.781608	-0.355482	1159.17	1090.95	1125.06	0.890548	-0.167235	1103.34	1005.83	1054.59	0.834763	-0.260562	902.657	1037.46	970.059	0.767855	-0.381094	#N/A	#N/A	#N/A	#N/A	#N/A	#N/A	#N/A	#N/A	#N/A	#N/A	#N/A	#N/A	#N/A						UQCRQ	LY6H			HMG20B
sp|Q9UHD8|SEPT9_HUMAN	SEPT9	SEPT9_HUMAN Septin-9	18	3002.81	2802.8	2902.81	2300.53	2244.77	2272.65	0.782915	-0.353072	2239.69	2430.21	2334.95	0.804377	-0.314056	2665.2	2316.91	2491.05	0.858154	-0.220691	2220.87	2288.29	2254.58	0.77669	-0.364589	#N/A	#N/A	#N/A	#N/A	#N/A	#N/A	#N/A	#N/A	#N/A	#N/A	#N/A	#N/A	#N/A						USP30	LY6L			HMGA1
sp|O60885|BRD4_HUMAN	BRD4	BRD4_HUMAN Bromodomain-containing protein 4	18	3918.83	3870.73	3894.78	2916.78	3181.86	3049.32	0.782925	-0.353054	3134.35	3595.52	3364.93	0.86396	-0.210963	3708.98	3221.4	3465.19	0.889701	-0.168607	2895.1	3446.12	3170.61	0.814067	-0.296781	#N/A	#N/A	#N/A	#N/A	#N/A	#N/A	#N/A	#N/A	BRD4	#N/A	#N/A	#N/A	#N/A						VARS2	LY9			HMGA2
sp|O14737|PDCD5_HUMAN	PDCD5	PDCD5_HUMAN Programmed cell death protein 5	7	1587.2	1467.57	1527.38	1141.41	1250.32	1195.87	0.782949	-0.353009	1389.75	1286.76	1338.26	0.876174	-0.190711	1348.61	1233.68	1291.14	0.84533	-0.242413	1198.13	1150.48	1174.31	0.768834	-0.379257	#N/A	#N/A	#N/A	#N/A	#N/A	#N/A	#N/A	#N/A	#N/A	#N/A	#N/A	#N/A	#N/A						VDAC2	LYPD1			HMGB1P1
sp|P33947|ERD22_HUMAN	KDELR2	ERD22_HUMAN ER lumen protein retaining receptor 2	3	348.198	305.176	326.687	289.821	221.918	255.87	0.783225	-0.352501	330.748	200.991	265.87	0.813836	-0.297191	225.247	244.375	234.811	0.718764	-0.476409	291.085	508.146	399.615	1.22324	0.290703	KDELR2	#N/A	#N/A	#N/A	#N/A	#N/A	#N/A	#N/A	#N/A	#N/A	#N/A	#N/A	#N/A						VDAC3	LYPD2			HMGB4
sp|O15455|TLR3_HUMAN	TLR3	TLR3_HUMAN Toll-like receptor 3	19	4418.75	4504.16	4461.45	3516.77	3472.37	3494.57	0.78328	-0.352399	3820.41	3214.8	3517.61	0.788443	-0.342921	3723.36	3979.39	3851.38	0.863255	-0.212141	3601.48	4322.11	3961.8	0.888005	-0.17136	#N/A	#N/A	#N/A	#N/A	#N/A	#N/A	#N/A	#N/A	#N/A	#N/A	#N/A	#N/A	#N/A						VPS13C	LYPD3			HMGN3
sp|Q92769|HDAC2_HUMAN	HDAC2	HDAC2_HUMAN Histone deacetylase 2	9	1050.98	1097.31	1074.14	805.393	877.528	841.461	0.783377	-0.352221	974.471	1002.1	988.285	0.920067	-0.120189	908.403	957.11	932.756	0.868371	-0.203616	913.065	1000.06	956.562	0.890534	-0.167258	#N/A	#N/A	#N/A	#N/A	#N/A	#N/A	#N/A	#N/A	#N/A	#N/A	#N/A	#N/A	#N/A						WARS2	LYPD4			HMGN4
sp|P12270|TPR_HUMAN	TPR	TPR_HUMAN Nucleoprotein TPR	16	2188.97	2190.08	2189.52	1720.64	1714.79	1717.72	0.784515	-0.350127	1914.97	1937.72	1926.35	0.8798	-0.184752	1828.18	1808.56	1818.37	0.830486	-0.267972	1876.41	1911.99	1894.2	0.865119	-0.209029	#N/A	#N/A	#N/A	#N/A	#N/A	#N/A	#N/A	#N/A	#N/A	#N/A	#N/A	#N/A	#N/A						YARS2	LYPD5			HMGN5
sp|Q9NW64|RBM22_HUMAN	RBM22	RBM22_HUMAN Pre-mRNA-splicing factor RBM22	3	220.451	214.919	217.685	163.735	177.858	170.797	0.784604	-0.349964	196.37	223.284	209.827	0.963902	-0.0530417	178.381	192.19	185.286	0.851163	-0.232492	170.569	182.724	176.647	0.811478	-0.301377	#N/A	#N/A	#N/A	#N/A	#N/A	#N/A	#N/A	#N/A	#N/A	#N/A	#N/A	#N/A	#N/A						YME1L1	LYPD6B			HMGXB3
sp|Q9UNN5|FAF1_HUMAN	FAF1	FAF1_HUMAN FAS-associated factor 1	3	297.969	294.936	296.452	246.416	218.815	232.615	0.784664	-0.349854	270.586	254.101	262.344	0.884943	-0.176344	281.642	258.15	269.896	0.910419	-0.135397	231.659	315.482	273.571	0.922814	-0.115888	#N/A	#N/A	#N/A	#N/A	#N/A	#N/A	#N/A	#N/A	FAF1	#N/A	#N/A	#N/A	#N/A						YRDC	MAG			HMGXB4
sp|Q9Y450|HBS1L_HUMAN	HBS1L	HBS1L_HUMAN HBS1-like protein	4	367.546	340.338	353.942	272.269	283.338	277.803	0.784884	-0.349448	324.918	340.976	332.947	0.940682	-0.0882204	344.953	308.217	326.585	0.922708	-0.116054	260.662	339.979	300.32	0.848502	-0.23701	#N/A	#N/A	#N/A	#N/A	#N/A	#N/A	#N/A	#N/A	#N/A	#N/A	#N/A	#N/A	#N/A							MAGI1			HMX1
sp|Q8WUA2|PPIL4_HUMAN	PPIL4	PPIL4_HUMAN Peptidyl-prolyl cis-trans isomerase-like 4	1	30.0372	29.9009	29.969	23.766	23.2904	23.5282	0.785083	-0.349082	23.8751	39.5656	31.7204	1.05844	0.0819353	21.9235	22.3867	22.1551	0.739266	-0.435835	25.5388	21.3218	23.4303	0.781817	-0.355098	#N/A	#N/A	#N/A	#N/A	#N/A	#N/A	#N/A	#N/A	PPIL4	#N/A	#N/A	#N/A	#N/A							MARCO			HMX2
sp|Q9H9A5-6|CNO10_HUMAN	CNOT10	CNO10_HUMAN Isoform 6 of CCR4-NOT transcription complex subunit 10	2	404.4	399.371	401.885	328.513	302.735	315.624	0.785358	-0.348578	300.54	316.228	308.384	0.767343	-0.382057	341.639	340.555	341.097	0.848742	-0.236602	328.099	441.691	384.895	0.957723	-0.0623196	#N/A	#N/A	#N/A	#N/A	#N/A	#N/A	#N/A	#N/A	#N/A	#N/A	#N/A	#N/A	#N/A							MARVELD2			HMX3
sp|Q9H1C4|UN93B_HUMAN	UNC93B1	UN93B_HUMAN Protein unc-93 homolog B1	2	681.211	781.681	731.446	585.509	563.886	574.697	0.785701	-0.347949	634.446	499.915	567.181	0.775424	-0.366943	535.498	616.97	576.234	0.787801	-0.344097	528.948	642.044	585.496	0.800464	-0.321092	#N/A	#N/A	#N/A	#N/A	#N/A	#N/A	#N/A	#N/A	#N/A	#N/A	#N/A	#N/A	#N/A							MAS1			HNF1A
sp|Q15366-2|PCBP2_HUMAN	PCBP2	PCBP2_HUMAN Isoform 2 of Poly(rC)-binding protein 2	24	5348.22	5689.36	5518.79	4261.68	4415.05	4338.36	0.786108	-0.347201	5143.22	5020.69	5081.95	0.920846	-0.118968	4855.63	4711.81	4783.72	0.866806	-0.206219	3984.2	5422.8	4703.5	0.85227	-0.230617	#N/A	#N/A	#N/A	#N/A	#N/A	#N/A	#N/A	#N/A	#N/A	#N/A	#N/A	#N/A	#N/A							MAS1L			HNF1B
sp|Q9UN86-2|G3BP2_HUMAN	G3BP2	G3BP2_HUMAN Isoform B of Ras GTPase-activating protein-binding protein 2	7	1229.81	1045.82	1137.82	902.601	886.469	894.535	0.786187	-0.347056	986.984	1099.95	1043.47	0.91708	-0.124881	970.499	885.033	927.766	0.815393	-0.294433	856.257	972.156	914.207	0.803476	-0.315674	#N/A	#N/A	#N/A	#N/A	#N/A	#N/A	#N/A	#N/A	#N/A	#N/A	#N/A	#N/A	#N/A							MC1R			HNF4A
sp|Q9H6Y7|RN167_HUMAN	RNF167	RN167_HUMAN E3 ubiquitin-protein ligase RNF167	3	2116.54	2352.19	2234.36	1762.92	1753.74	1758.33	0.786948	-0.345659	1663.98	1396.59	1530.28	0.684886	-0.546065	1608.66	1768.19	1688.43	0.755662	-0.404187	1428.4	1958.31	1693.36	0.757869	-0.39998	#N/A	#N/A	#N/A	#N/A	#N/A	#N/A	#N/A	#N/A	#N/A	#N/A	#N/A	#N/A	#N/A							MC2R			HNF4G
sp|Q9NP66|HM20A_HUMAN	HMG20A	HM20A_HUMAN High mobility group protein 20A	1	76.5292	79.0019	77.7656	61.9113	60.4919	61.2016	0.787001	-0.345562	70.865	66.7393	68.8021	0.884738	-0.176678	63.7832	59.0692	61.4262	0.78989	-0.340277	60.8096	58.6329	59.7212	0.767965	-0.380887	#N/A	#N/A	#N/A	#N/A	#N/A	#N/A	#N/A	#N/A	HMG20A	#N/A	#N/A	#N/A	#N/A							MC3R			HNRNPA0
sp|P21333|FLNA_HUMAN	FLNA	FLNA_HUMAN Filamin-A	208	68168.6	65097.1	66632.9	52636.5	52249.9	52443.2	0.787047	-0.345478	58553	63276.1	60914.6	0.914182	-0.129447	63588.7	58847.8	61218.2	0.91874	-0.122272	52716.7	67106.8	59911.8	0.899132	-0.153395	#N/A	#N/A	#N/A	#N/A	#N/A	#N/A	#N/A	#N/A	#N/A	#N/A	#N/A	#N/A	#N/A							MC4R			HNRNPA3
sp|P62318|SMD3_HUMAN	SNRPD3	SMD3_HUMAN Small nuclear ribonucleoprotein Sm D3	2	794.158	797.843	796	581.566	671.783	626.675	0.787279	-0.345053	717.074	848.665	782.87	0.983504	-0.0239975	682.898	675.47	679.184	0.853246	-0.228967	727.604	629.276	678.44	0.852311	-0.230548	#N/A	#N/A	#N/A	#N/A	#N/A	#N/A	#N/A	#N/A	#N/A	#N/A	#N/A	#N/A	#N/A							MC5R			HNRNPC
sp|Q9BR61|ACBD6_HUMAN	ACBD6	ACBD6_HUMAN Acyl-CoA-binding domain-containing protein 6	1	51.7602	47.9359	49.8481	36.5952	41.9033	39.2493	0.787378	-0.344872	45.1157	57.4702	51.2929	1.02899	0.0412235	49.4883	42.238	45.8632	0.920059	-0.120202	35.8793	38.4719	37.1756	0.745778	-0.423181	#N/A	#N/A	#N/A	#N/A	#N/A	#N/A	#N/A	#N/A	#N/A	ACBD6	#N/A	#N/A	#N/A							MCHR1			HNRNPCL1
sp|Q70E73|RAPH1_HUMAN	RAPH1	RAPH1_HUMAN Ras-associated and pleckstrin homology domains-containing protein 1	2	202.392	187.678	195.035	145.755	161.546	153.65	0.78781	-0.344081	185.509	182.927	184.218	0.944538	-0.082319	181.096	170.748	175.922	0.902002	-0.148797	160.396	159.407	159.901	0.819861	-0.28655	#N/A	#N/A	#N/A	#N/A	#N/A	#N/A	#N/A	#N/A	#N/A	#N/A	#N/A	#N/A	#N/A							MCHR2			HNRNPCL2
sp|Q96C86|DCPS_HUMAN	DCPS	DCPS_HUMAN m7GpppX diphosphatase	2	429.331	344.308	386.82	299.492	310.152	304.822	0.788021	-0.343693	411.505	357.593	384.549	0.99413	-0.00849308	367.226	339.127	353.177	0.913027	-0.131271	293.117	211.613	252.365	0.65241	-0.616149	#N/A	#N/A	#N/A	#N/A	#N/A	#N/A	#N/A	#N/A	#N/A	#N/A	#N/A	#N/A	#N/A							MDGA1			HNRNPCL3
sp|Q8ND56-2|LS14A_HUMAN	LSM14A	LS14A_HUMAN Isoform 2 of Protein LSM14 homolog A	1	156.453	149.626	153.04	115.944	125.394	120.669	0.788483	-0.342849	119.548	137.263	128.406	0.839035	-0.253197	128.399	122.547	125.473	0.819873	-0.286527	119.406	159.311	139.358	0.910605	-0.135103	#N/A	#N/A	#N/A	#N/A	#N/A	#N/A	#N/A	#N/A	#N/A	#N/A	#N/A	#N/A	#N/A							MDGA2			HNRNPCL4
sp|A3KN83|SBNO1_HUMAN	SBNO1	SBNO1_HUMAN Protein strawberry notch homolog 1	1	20.8836	24.8115	22.8475	16.6897	19.3764	18.033	0.789277	-0.341396	20.77	20.6197	20.6949	0.90578	-0.142768	19.0465	18.2021	18.6243	0.815155	-0.294853	24.2792	26.8711	25.5752	1.11938	0.162703	#N/A	#N/A	#N/A	#N/A	#N/A	#N/A	#N/A	#N/A	#N/A	#N/A	#N/A	#N/A	#N/A							MEGF10			HNRNPF
sp|P00966|ASSY_HUMAN	ASS1	ASSY_HUMAN Argininosuccinate synthase	7	1161.97	1067.62	1114.8	837.902	923.101	880.502	0.789833	-0.340381	977.168	1164.01	1070.59	0.960346	-0.0583737	935.918	927.811	931.865	0.835907	-0.258586	831.296	1009.71	920.503	0.825715	-0.276284	#N/A	#N/A	#N/A	#N/A	#N/A	#N/A	#N/A	#N/A	#N/A	ASS1	#N/A	#N/A	#N/A							MEGF11			HNRNPH1
sp|Q16576|RBBP7_HUMAN	RBBP7	RBBP7_HUMAN Histone-binding protein RBBP7	2	713.657	612.156	662.907	507.524	539.855	523.689	0.78999	-0.340094	556.264	670.047	613.156	0.92495	-0.112552	605	563.246	584.123	0.881154	-0.182533	506.505	536.232	521.369	0.786489	-0.346502	#N/A	#N/A	#N/A	#N/A	#N/A	#N/A	#N/A	#N/A	RBBP7	#N/A	#N/A	#N/A	#N/A							MELK			HNRNPH2
sp|Q6YBV0|S36A4_HUMAN	SLC36A4	S36A4_HUMAN Proton-coupled amino acid transporter 4	1	561.881	632.225	597.053	492.623	451.338	471.981	0.790517	-0.339132	569.935	428.281	499.108	0.835953	-0.258507	558.382	642.264	600.323	1.00548	0.00787994	636.346	1041	838.673	1.40469	0.490249	#N/A	#N/A	#N/A	#N/A	#N/A	#N/A	#N/A	#N/A	#N/A	#N/A	#N/A	#N/A	#N/A							MELTF			HNRNPH3
sp|O76094|SRP72_HUMAN	SRP72	SRP72_HUMAN Signal recognition particle subunit SRP72	28	7401.62	7897.05	7649.34	6062.44	6033.44	6047.94	0.790649	-0.338891	7143.84	6806.65	6975.24	0.911876	-0.13309	6405.03	6047.21	6226.12	0.813943	-0.297001	5484.92	7413.31	6449.11	0.843095	-0.246233	#N/A	#N/A	#N/A	#N/A	#N/A	#N/A	#N/A	#N/A	#N/A	#N/A	#N/A	#N/A	#N/A							MFAP3			HNRNPM
sp|Q14677|EPN4_HUMAN	CLINT1	EPN4_HUMAN Clathrin interactor 1	2	144.07	114.304	129.187	100.918	103.377	102.148	0.790695	-0.338807	120.848	102.111	111.48	0.862931	-0.212682	101.747	84.7419	93.2445	0.721779	-0.470371	85.0955	138.632	111.864	0.865906	-0.207718	#N/A	#N/A	#N/A	#N/A	#N/A	#N/A	#N/A	#N/A	#N/A	#N/A	#N/A	#N/A	#N/A							MFRP			HNRNPUL1
sp|Q9UMX0|UBQL1_HUMAN	UBQLN1	UBQL1_HUMAN Ubiquilin-1	11	1491.8	1523.77	1507.78	1136.35	1250.44	1193.39	0.791489	-0.337359	1365.17	1473.33	1419.25	0.941281	-0.087302	1226.12	1266.3	1246.21	0.826517	-0.274884	1181.72	1824.33	1503.03	0.996843	-0.00456172	#N/A	#N/A	#N/A	#N/A	#N/A	#N/A	#N/A	#N/A	#N/A	#N/A	#N/A	#N/A	#N/A							MFSD2B			HNRNPUL2
sp|P42677|RS27_HUMAN	RPS27	RS27_HUMAN 40S ribosomal protein S27	10	4863.17	4502.99	4683.08	3526.92	3886.31	3706.61	0.791491	-0.337355	4335.04	4332.15	4333.59	0.925373	-0.111893	4445.66	4143.74	4294.7	0.917067	-0.1249	4110.76	4627.3	4369.03	0.932939	-0.100145	#N/A	#N/A	#N/A	#N/A	#N/A	#N/A	#N/A	#N/A	#N/A	#N/A	#N/A	#N/A	#N/A							MFSD4B			HOMEZ
sp|Q7KZ85|SPT6H_HUMAN	SUPT6H	SPT6H_HUMAN Transcription elongation factor SPT6	1	43.3222	43.2873	43.3047	37.8885	30.6912	34.2899	0.791827	-0.336744	35.1866	48.0171	41.6018	0.960676	-0.0578776	33.6604	34.161	33.9107	0.783071	-0.352785	39.3498	41.0987	40.2242	0.928865	-0.10646	#N/A	#N/A	#N/A	#N/A	#N/A	#N/A	#N/A	#N/A	SUPT6H	#N/A	#N/A	#N/A	#N/A							MFSD5			HORMAD1
sp|Q6DKK2|TTC19_HUMAN	TTC19	TTC19_HUMAN Tetratricopeptide repeat protein 19, mitochondrial	1	61.8399	82.3976	72.1188	57.7029	56.5413	57.1221	0.792056	-0.336325	56.9005	61.451	59.1758	0.820532	-0.285368	63.0914	60.0124	61.5519	0.85348	-0.228571	50.1051	108.63	79.3675	1.10051	0.138175	#N/A	#N/A	#N/A	#N/A	TTC19	#N/A	#N/A	#N/A	#N/A	#N/A	#N/A	#N/A	#N/A							MGAM			HORMAD2
sp|O75822|EIF3J_HUMAN	EIF3J	EIF3J_HUMAN Eukaryotic translation initiation factor 3 subunit J	15	5536.58	5535.71	5536.15	4319.95	4458.6	4389.27	0.79284	-0.334899	4799.12	5083.66	4941.39	0.892569	-0.163965	4782.06	4401.43	4591.75	0.829412	-0.269839	4032.28	4424.23	4228.26	0.763754	-0.388819	#N/A	#N/A	#N/A	#N/A	#N/A	#N/A	#N/A	#N/A	#N/A	EIF3J	#N/A	#N/A	#N/A							MILR1			HOXA1
sp|Q9BPX5|ARP5L_HUMAN	ARPC5L	ARP5L_HUMAN Actin-related protein 2/3 complex subunit 5-like protein	8	919.438	966.183	942.811	739.418	755.695	747.557	0.792902	-0.334785	963.753	920.139	941.946	0.999083	-0.00132347	867.18	750.479	808.83	0.857892	-0.221132	711.728	694.215	702.971	0.745613	-0.423502	#N/A	#N/A	#N/A	#N/A	#N/A	#N/A	#N/A	#N/A	#N/A	#N/A	#N/A	#N/A	#N/A							MINAR1			HOXA10
sp|A8MWD9|RUXGL_HUMAN		RUXGL_HUMAN Small nuclear ribonucleoprotein G-like protein	3	1142.78	1029.48	1086.13	889.869	832.646	861.257	0.79296	-0.33468	961.604	1036	998.802	0.919597	-0.120926	900.676	894.519	897.598	0.826418	-0.275056	907.977	733.356	820.667	0.755588	-0.404329	#N/A	#N/A	#N/A	#N/A	#N/A	#N/A	#N/A	#N/A	#N/A	#N/A	#N/A	#N/A	#N/A							MIP			HOXA11
sp|Q92499|DDX1_HUMAN	DDX1	DDX1_HUMAN ATP-dependent RNA helicase DDX1	14	2736.41	2870.14	2803.27	2226.82	2221.96	2224.39	0.793497	-0.333704	2440.37	2530.7	2485.53	0.886654	-0.173557	2332.97	2380.9	2356.93	0.840779	-0.250201	2137.24	2688.24	2412.74	0.860686	-0.216441	#N/A	#N/A	#N/A	#N/A	#N/A	#N/A	#N/A	#N/A	#N/A	#N/A	#N/A	#N/A	#N/A							MLNR			HOXA13
sp|Q969X1|LFG3_HUMAN	TMBIM1	LFG3_HUMAN Protein lifeguard 3	5	496.693	571.107	533.9	443.246	404.295	423.77	0.793726	-0.333286	456.443	336.204	396.323	0.742318	-0.429891	410.472	426.79	418.631	0.7841	-0.35089	375.463	502.446	438.955	0.822166	-0.282498	#N/A	#N/A	#N/A	#N/A	#N/A	#N/A	#N/A	#N/A	#N/A	#N/A	#N/A	#N/A	#N/A							MME			HOXA2
sp|Q13490|BIRC2_HUMAN	BIRC2	BIRC2_HUMAN Baculoviral IAP repeat-containing protein 2	1	33.5338	36.5039	35.0189	26.5341	29.0897	27.8119	0.794198	-0.332429	23.5404	24.4819	24.0112	0.685664	-0.544427	25.3959	28.6945	27.0452	0.772304	-0.372759	23.8588	28.6989	26.2788	0.75042	-0.41423	#N/A	#N/A	#N/A	#N/A	#N/A	#N/A	#N/A	#N/A	#N/A	#N/A	#N/A	#N/A	#N/A							MOG			HOXA3
sp|Q14194-2|DPYL1_HUMAN	CRMP1	DPYL1_HUMAN Isoform LCRMP-1 of Dihydropyrimidinase-related protein 1	5	1720.11	1698.46	1709.28	1426.54	1288.9	1357.72	0.79432	-0.332207	1231.97	1470.77	1351.37	0.790605	-0.33897	1438.76	1315.24	1377	0.8056	-0.311864	1130.48	1408.8	1269.64	0.74279	-0.428973	#N/A	#N/A	#N/A	#N/A	#N/A	#N/A	#N/A	#N/A	#N/A	#N/A	#N/A	#N/A	#N/A							MOSMO			HOXA4
sp|Q96KG9|NTKL_HUMAN	SCYL1	NTKL_HUMAN N-terminal kinase-like protein	8	939.394	950.238	944.816	733.195	767.841	750.518	0.794354	-0.332147	910.433	875.647	893.04	0.9452	-0.0813086	864.886	868.768	866.827	0.917456	-0.124289	734.529	1062.14	898.335	0.950804	-0.0727807	#N/A	#N/A	#N/A	#N/A	#N/A	#N/A	#N/A	#N/A	#N/A	#N/A	#N/A	#N/A	#N/A							MOSPD2			HOXA5
sp|Q8N2U0|TM256_HUMAN	TMEM256	TM256_HUMAN Transmembrane protein 256	1	35.7241	31.9952	33.8597	28.8718	24.9284	26.9001	0.794459	-0.331956	27.4841	19.4428	23.4635	0.692962	-0.529152	30.1918	24.0347	27.1133	0.800754	-0.320569	38.5086	27.1372	32.8229	0.969381	-0.0448643	#N/A	#N/A	#N/A	#N/A	#N/A	#N/A	#N/A	#N/A	#N/A	#N/A	#N/A	#N/A	#N/A							MPP1			HOXA6
sp|Q9BWF3|RBM4_HUMAN	RBM4	RBM4_HUMAN RNA-binding protein 4	2	428.303	432.693	430.498	317.403	366.625	342.014	0.794461	-0.331951	387.033	418.334	402.683	0.93539	-0.0963602	347.602	338.855	343.228	0.797282	-0.326837	367.747	371.766	369.757	0.858904	-0.219431	#N/A	#N/A	#N/A	#N/A	#N/A	#N/A	#N/A	#N/A	#N/A	#N/A	#N/A	#N/A	#N/A							MPZ			HOXA7
sp|O75581|LRP6_HUMAN	LRP6	LRP6_HUMAN Low-density lipoprotein receptor-related protein 6	1	57.9986	67.3445	62.6715	55.8133	43.7693	49.7913	0.79448	-0.331917	64.8083	51.8749	58.3416	0.93091	-0.103286	55.0073	60.4815	57.7444	0.921381	-0.11813	57.8244	67.5202	62.6723	1.00001	1.72648e-05	#N/A	#N/A	#N/A	#N/A	#N/A	#N/A	#N/A	#N/A	#N/A	#N/A	#N/A	#N/A	#N/A							MRGPRE			HOXA9
sp|Q07157|ZO1_HUMAN	TJP1	ZO1_HUMAN Tight junction protein ZO-1	2	140.656	144.227	142.442	111.616	114.748	113.182	0.794586	-0.331725	120.225	127.216	123.72	0.868571	-0.203285	132.013	125.693	128.853	0.904603	-0.144643	107.136	148.875	128.005	0.898653	-0.154164	#N/A	#N/A	#N/A	#N/A	#N/A	#N/A	#N/A	#N/A	#N/A	#N/A	#N/A	#N/A	#N/A							MRGPRF			HOXB1
sp|Q12913|PTPRJ_HUMAN	PTPRJ	PTPRJ_HUMAN Receptor-type tyrosine-protein phosphatase eta	29	5805.1	5653.88	5729.49	4561.1	4544.98	4553.04	0.794668	-0.331577	5322.65	5184.93	5253.79	0.916973	-0.125048	5670.17	5386.81	5528.49	0.964918	-0.0515212	4638.22	6124.45	5381.34	0.939235	-0.0904426	#N/A	#N/A	#N/A	#N/A	#N/A	PTPRJ	#N/A	#N/A	#N/A	#N/A	#N/A	#N/A	#N/A							MRGPRG			HOXB13
sp|Q9BVX2|T106C_HUMAN	TMEM106C	T106C_HUMAN Transmembrane protein 106C	1	147.487	193.153	170.32	133.426	137.282	135.354	0.794704	-0.33151	131.762	109.15	120.456	0.707233	-0.499742	108.333	138.631	123.482	0.725	-0.463947	121.472	175.602	148.537	0.872105	-0.197426	TMEM106C	#N/A	#N/A	#N/A	#N/A	#N/A	#N/A	#N/A	#N/A	#N/A	#N/A	#N/A	#N/A							MRGPRX1			HOXB2
sp|Q5H9R7-5|PP6R3_HUMAN	PPP6R3	PP6R3_HUMAN Isoform 5 of Serine/threonine-protein phosphatase 6 regulatory subunit 3	1	169.462	146.042	157.752	121.591	129.242	125.416	0.795023	-0.330931	158.696	153.855	156.275	0.99064	-0.0135667	149.098	143.737	146.418	0.92815	-0.10757	126.091	147.775	136.933	0.868027	-0.204188	#N/A	#N/A	#N/A	#N/A	#N/A	#N/A	#N/A	#N/A	#N/A	#N/A	#N/A	#N/A	#N/A							MRGPRX2			HOXB3
sp|P52569-3|CTR2_HUMAN	SLC7A2	CTR2_HUMAN Isoform 3 of Low affinity cationic amino acid transporter 2	18	5560.62	5669.24	5614.93	4152.31	4780.41	4466.36	0.795444	-0.330168	6796.25	4304.26	5550.26	0.988482	-0.016714	5697.94	7755.38	6726.66	1.198	0.260622	6729.97	10924.6	8827.28	1.57211	0.652702	#N/A	#N/A	#N/A	#N/A	#N/A	SLC7A2	#N/A	#N/A	#N/A	#N/A	#N/A	#N/A	#N/A							MRGPRX3			HOXB4
sp|Q5T3U5|MRP7_HUMAN	ABCC10	MRP7_HUMAN Multidrug resistance-associated protein 7	7	863.811	1007.23	935.521	740.106	748.787	744.447	0.795756	-0.329601	762.092	687.533	724.812	0.774769	-0.368161	800.426	864.87	832.648	0.890037	-0.168063	759.365	914.09	836.727	0.894398	-0.161011	#N/A	#N/A	#N/A	#N/A	#N/A	ABCC10	#N/A	#N/A	#N/A	#N/A	#N/A	#N/A	#N/A							MRGPRX4			HOXB5
sp|O75882|ATRN_HUMAN	ATRN	ATRN_HUMAN Attractin	1	125.652	104.829	115.24	99.8383	83.5872	91.7127	0.795838	-0.329454	93.532	86.3814	89.9567	0.7806	-0.357345	99.8237	93.1907	96.5072	0.837442	-0.255939	104.451	108.411	106.431	0.923556	-0.114729	#N/A	#N/A	#N/A	#N/A	#N/A	#N/A	#N/A	#N/A	#N/A	#N/A	#N/A	#N/A	#N/A							MS4A1			HOXB6
sp|Q13049|TRI32_HUMAN	TRIM32	TRI32_HUMAN E3 ubiquitin-protein ligase TRIM32	7	1777.23	1813.78	1795.51	1464.3	1393.94	1429.12	0.795943	-0.329263	1626.04	1542.76	1584.4	0.882426	-0.180453	1628.75	1527.85	1578.3	0.879028	-0.186018	1235.38	1692.01	1463.7	0.8152	-0.294775	#N/A	#N/A	#N/A	#N/A	#N/A	#N/A	#N/A	#N/A	#N/A	#N/A	#N/A	#N/A	#N/A							MTNR1A			HOXB7
sp|Q6UUV7|CRTC3_HUMAN	CRTC3	CRTC3_HUMAN CREB-regulated transcription coactivator 3	1	187.643	197.288	192.466	152.749	153.668	153.209	0.796031	-0.329104	170.933	196.983	183.958	0.955797	-0.0652234	192.695	165.614	179.154	0.93084	-0.103396	144.002	168.818	156.41	0.812665	-0.299267	#N/A	#N/A	#N/A	#N/A	#N/A	#N/A	#N/A	#N/A	#N/A	#N/A	#N/A	#N/A	#N/A							MTNR1B			HOXB8
sp|Q9BWU0|NADAP_HUMAN	SLC4A1AP	NADAP_HUMAN Kanadaptin	1	65.4137	62.81	64.1119	52.7672	49.3191	51.0431	0.796158	-0.328874	50.9525	62.2757	56.6141	0.883052	-0.17943	44.0225	49.8402	46.9314	0.732023	-0.450039	49.873	63.0323	56.4526	0.880534	-0.18355	#N/A	#N/A	#N/A	#N/A	#N/A	#N/A	#N/A	#N/A	#N/A	#N/A	#N/A	#N/A	#N/A							MUC21			HOXB9
sp|Q12884|SEPR_HUMAN	FAP	SEPR_HUMAN Seprase	9	1240.12	1380.28	1310.2	931.13	1155.61	1043.37	0.796344	-0.328536	1266.22	1038.04	1152.13	0.879354	-0.185484	1089.57	1272.72	1181.14	0.9015	-0.149601	1117.13	1452.74	1284.93	0.980717	-0.0280917	#N/A	#N/A	#N/A	#N/A	#N/A	#N/A	#N/A	#N/A	#N/A	#N/A	#N/A	#N/A	#N/A							MUSK			HOXC10
sp|Q5SRE5|NU188_HUMAN	NUP188	NU188_HUMAN Nucleoporin NUP188 homolog	5	857.539	922.866	890.202	693.483	724.364	708.923	0.796362	-0.328504	793.604	779.777	786.691	0.883721	-0.178337	778.854	709.964	744.409	0.836224	-0.258038	650.816	809.756	730.286	0.820359	-0.285672	#N/A	#N/A	#N/A	#N/A	#N/A	#N/A	#N/A	#N/A	NUP188	#N/A	#N/A	#N/A	#N/A							MYMX			HOXC11
sp|P43243|MATR3_HUMAN	MATR3	MATR3_HUMAN Matrin-3	8	1232.25	1039.37	1135.81	874.14	934.995	904.567	0.796407	-0.328421	1028.86	1142.55	1085.7	0.955886	-0.0650894	983.955	995.093	989.524	0.871206	-0.198915	981.682	842.14	911.911	0.802873	-0.316757	#N/A	#N/A	#N/A	#N/A	#N/A	#N/A	#N/A	#N/A	MATR3	#N/A	#N/A	#N/A	#N/A							MYO1G			HOXC12
sp|Q07866-9|KLC1_HUMAN	KLC1	KLC1_HUMAN Isoform I of Kinesin light chain 1	3	375.433	370.707	373.07	293.985	300.438	297.212	0.796664	-0.327956	361.665	344.003	352.834	0.945758	-0.0804568	351.078	338.689	344.884	0.924447	-0.113337	303.524	363.673	333.599	0.894198	-0.161334	#N/A	#N/A	#N/A	#N/A	#N/A	#N/A	#N/A	#N/A	#N/A	#N/A	#N/A	#N/A	#N/A							NAALAD2			HOXC13
sp|Q00839|HNRPU_HUMAN	HNRNPU	HNRPU_HUMAN Heterogeneous nuclear ribonucleoprotein U	27	8187.03	7902.52	8044.77	6429.69	6390.93	6410.31	0.796829	-0.327658	6085.66	7823.18	6954.42	0.864464	-0.210122	6234.26	6062.96	6148.61	0.764299	-0.387792	6514.66	6674.17	6594.41	0.819714	-0.286807	#N/A	#N/A	#N/A	#N/A	#N/A	#N/A	#N/A	#N/A	#N/A	#N/A	#N/A	#N/A	#N/A							NAALADL1			HOXC4
sp|Q9HB71|CYBP_HUMAN	CACYBP	CYBP_HUMAN Calcyclin-binding protein	15	4744.09	4740.15	4742.12	3725.72	3833.25	3779.48	0.797003	-0.327343	4722.67	4751.73	4737.2	0.998962	-0.00149759	4527.16	4214.28	4370.72	0.921681	-0.117661	3780.78	3942.8	3861.79	0.814359	-0.296262	#N/A	#N/A	#N/A	#N/A	#N/A	#N/A	#N/A	#N/A	#N/A	#N/A	#N/A	#N/A	#N/A							NAE1			HOXC5
sp|Q96DH6|MSI2H_HUMAN	MSI2	MSI2H_HUMAN RNA-binding protein Musashi homolog 2	1	165.845	152.906	159.375	125.551	128.54	127.046	0.797146	-0.327085	143.393	136.572	139.983	0.878319	-0.187183	127.492	138.401	132.947	0.834172	-0.261584	126.14	119.031	122.585	0.769162	-0.378642	#N/A	#N/A	#N/A	#N/A	#N/A	#N/A	#N/A	#N/A	#N/A	#N/A	#N/A	#N/A	#N/A							NAPA			HOXC6
sp|P51610-4|HCFC1_HUMAN	HCFC1	HCFC1_HUMAN Isoform 4 of Host cell factor 1	4	1052.48	999.886	1026.18	796.847	839.603	818.225	0.797348	-0.326719	899.562	1005.48	952.521	0.928217	-0.107465	908.819	839.743	874.281	0.851974	-0.231119	846.574	882.166	864.37	0.842316	-0.247567	#N/A	#N/A	#N/A	#N/A	#N/A	#N/A	#N/A	#N/A	#N/A	#N/A	#N/A	#N/A	#N/A							NCAM2			HOXC8
sp|Q8IZH2|XRN1_HUMAN	XRN1	XRN1_HUMAN 5'-3' exoribonuclease 1	1	66.5239	62.1312	64.3276	49.1604	53.4471	51.3038	0.797539	-0.326372	60.7273	73.6243	67.1758	1.04428	0.0625049	56.1577	60.6912	58.4245	0.908234	-0.138864	47.2643	53.1779	50.2211	0.780709	-0.357143	#N/A	#N/A	#N/A	#N/A	#N/A	#N/A	#N/A	#N/A	#N/A	#N/A	#N/A	#N/A	#N/A							NCMAP			HOXC9
sp|Q9BPZ3|PAIP2_HUMAN	PAIP2	PAIP2_HUMAN Polyadenylate-binding protein-interacting protein 2	1	32.648	40.4533	36.5507	30.812	27.4903	29.1512	0.797555	-0.326344	31.4086	27.6964	29.5525	0.808536	-0.306617	31.2985	27.7354	29.517	0.807563	-0.308353	23.1523	32.4819	27.8171	0.761056	-0.393925	#N/A	#N/A	#N/A	#N/A	#N/A	#N/A	#N/A	#N/A	#N/A	PAIP2	#N/A	#N/A	#N/A							NCR1			HOXD1
sp|P16989|YBOX3_HUMAN	YBX3	YBOX3_HUMAN Y-box-binding protein 3	12	5000.72	5022.72	5011.72	4064.93	3929.82	3997.38	0.797605	-0.326253	4178.69	4622.95	4400.82	0.878106	-0.187533	4452.49	4259.96	4356.23	0.869208	-0.202227	3868.53	4864.49	4366.51	0.87126	-0.198825	#N/A	#N/A	#N/A	#N/A	#N/A	#N/A	#N/A	#N/A	#N/A	#N/A	#N/A	#N/A	#N/A							NCR2			HOXD10
sp|Q53EL6|PDCD4_HUMAN	PDCD4	PDCD4_HUMAN Programmed cell death protein 4	1	48.0868	43.7502	45.9185	32.573	40.6778	36.6254	0.797618	-0.326231	44.818	42.8551	43.8366	0.95466	-0.0669413	42.4769	37.0584	39.7677	0.866049	-0.20748	43.6437	36.07	39.8569	0.867991	-0.204248	#N/A	#N/A	#N/A	#N/A	#N/A	#N/A	#N/A	#N/A	#N/A	#N/A	#N/A	#N/A	#N/A							NCR3			HOXD11
sp|P20908|CO5A1_HUMAN	COL5A1	CO5A1_HUMAN Collagen alpha-1(V) chain	3	290.051	220.258	255.154	189.295	217.961	203.628	0.798058	-0.325435	267.213	239.109	253.161	0.992187	-0.0113159	253.454	278.801	266.127	1.04301	0.0607465	236.914	194.371	215.642	0.845145	-0.24273	#N/A	#N/A	#N/A	#N/A	#N/A	#N/A	#N/A	#N/A	#N/A	#N/A	#N/A	#N/A	#N/A							NCR3LG1			HOXD12
sp|P62829|RL23_HUMAN	RPL23	RL23_HUMAN 60S ribosomal protein L23	14	4596.85	4452.03	4524.44	3473.17	3753.45	3613.31	0.79862	-0.324418	4665.52	4250.01	4457.77	0.985263	-0.0214187	4434.65	4294.08	4364.36	0.96462	-0.0519675	3561.99	4029.73	3795.86	0.838968	-0.253312	#N/A	#N/A	#N/A	#N/A	#N/A	#N/A	#N/A	#N/A	#N/A	#N/A	#N/A	#N/A	#N/A							NECTIN2			HOXD13
sp|P15144|AMPN_HUMAN	ANPEP	AMPN_HUMAN Aminopeptidase N	24	4578.54	5556.29	5067.41	3973.82	4120.29	4047.06	0.798643	-0.324378	4045.1	3560.29	3802.69	0.750421	-0.414228	4334.58	4457.14	4395.86	0.867476	-0.205105	3775.09	6469.43	5122.26	1.01082	0.0155305	#N/A	#N/A	#N/A	#N/A	#N/A	ANPEP	#N/A	#N/A	#N/A	#N/A	#N/A	#N/A	#N/A							NECTIN3			HOXD3
sp|Q92890-1|UFD1_HUMAN	UFD1L	UFD1_HUMAN Isoform Long of Ubiquitin fusion degradation protein 1 homolog	12	3438.7	3420.67	3429.68	2625.22	2853.56	2739.39	0.798729	-0.324221	2858.06	3021.01	2939.53	0.857086	-0.222488	3030.48	2870.35	2950.41	0.860258	-0.217158	2700.06	2537.69	2618.88	0.763591	-0.389129	#N/A	#N/A	#N/A	#N/A	#N/A	#N/A	#N/A	#N/A	#N/A	#N/A	#N/A	#N/A	#N/A							NEGR1			HOXD4
sp|Q9NUL3|STAU2_HUMAN	STAU2	STAU2_HUMAN Double-stranded RNA-binding protein Staufen homolog 2	1	448.592	457.093	452.842	362.096	361.661	361.879	0.799127	-0.323504	405.969	401.69	403.829	0.891766	-0.165263	388.626	378.367	383.496	0.846865	-0.239796	349.01	398.208	373.609	0.825031	-0.27748	#N/A	#N/A	#N/A	#N/A	#N/A	#N/A	#N/A	#N/A	#N/A	#N/A	#N/A	#N/A	#N/A							NEO1			HOXD8
sp|Q99615|DNJC7_HUMAN	DNAJC7	DNJC7_HUMAN DnaJ homolog subfamily C member 7	45	14711.5	12900.6	13806	10289.7	11777.8	11033.8	0.799197	-0.323377	13474.1	12407.4	12940.8	0.937325	-0.0933794	12349.8	11453.5	11901.6	0.86206	-0.214139	9958.19	9420.65	9689.42	0.701824	-0.510818	#N/A	#N/A	#N/A	#N/A	#N/A	#N/A	#N/A	#N/A	#N/A	#N/A	#N/A	#N/A	#N/A							NEU3			HOXD9
sp|Q8WXA9-2|SREK1_HUMAN	SREK1	SREK1_HUMAN Isoform 2 of Splicing regulatory glutamine/lysine-rich protein 1	1	106.506	94.6533	100.58	74.171	86.6445	80.4077	0.799444	-0.322932	90.0697	137.002	113.536	1.12882	0.174809	86.421	74.3994	80.4102	0.799468	-0.322888	80.7619	90.2493	85.5056	0.850128	-0.234248	#N/A	#N/A	#N/A	#N/A	#N/A	#N/A	#N/A	#N/A	SREK1	#N/A	#N/A	#N/A	#N/A							NFAM1			HP1BP3
sp|Q13409|DC1I2_HUMAN	DYNC1I2	DC1I2_HUMAN Cytoplasmic dynein 1 intermediate chain 2	7	1455.45	1514.71	1485.08	1206.55	1168.34	1187.44	0.799583	-0.32268	1257.85	1325.59	1291.72	0.869798	-0.201247	1307.69	1241.26	1274.47	0.858186	-0.220638	1137.15	1545.17	1341.16	0.903089	-0.147059	#N/A	#N/A	#N/A	#N/A	#N/A	#N/A	#N/A	#N/A	#N/A	#N/A	#N/A	#N/A	#N/A							NFASC			HR
sp|Q6P2H3|CEP85_HUMAN	CEP85	CEP85_HUMAN Centrosomal protein of 85 kDa	6	918.088	880.638	899.363	668.447	769.837	719.142	0.799613	-0.322627	957.304	863.454	910.379	1.01225	0.0175637	796.711	753.692	775.202	0.861945	-0.214332	654.779	725.372	690.075	0.767294	-0.382149	#N/A	#N/A	#N/A	#N/A	#N/A	#N/A	#N/A	#N/A	#N/A	#N/A	#N/A	#N/A	#N/A							NGFR			HSBP1
sp|Q01813|K6PP_HUMAN	PFKP	K6PP_HUMAN 6-phosphofructokinase type C	2	85.8672	56.5964	71.2318	60.9002	53.0874	56.9938	0.800117	-0.321716	69.7295	72.0656	70.8975	0.995308	-0.00678567	70.9045	62.6229	66.7637	0.937274	-0.0934575	67.3894	65.5631	66.4762	0.933238	-0.0996824	#N/A	#N/A	#N/A	#N/A	#N/A	#N/A	#N/A	#N/A	#N/A	PFKP	#N/A	#N/A	#N/A							NKAIN1			HSF4
sp|Q9NXF7|DCA16_HUMAN	DCAF16	DCA16_HUMAN DDB1- and CUL4-associated factor 16	1	37.9988	44.8084	41.4036	28.746	37.516	33.131	0.800196	-0.321574	34.1733	41.6186	37.8959	0.915282	-0.127713	39.6508	39.1996	39.4252	0.952217	-0.0706381	29.3542	37.8476	33.6009	0.811545	-0.301256	#N/A	#N/A	#N/A	#N/A	#N/A	#N/A	#N/A	#N/A	DCAF16	#N/A	#N/A	#N/A	#N/A							NKAIN2			HSF5
sp|O95758-4|PTBP3_HUMAN	PTBP3	PTBP3_HUMAN Isoform 4 of Polypyrimidine tract-binding protein 3	3	576.756	536.164	556.46	423.733	466.971	445.352	0.800331	-0.321332	452.539	520.957	486.748	0.874722	-0.193103	507.608	480.196	493.902	0.887579	-0.172053	452.373	429.656	441.014	0.792536	-0.335452	#N/A	#N/A	#N/A	#N/A	#N/A	#N/A	#N/A	#N/A	#N/A	#N/A	#N/A	#N/A	#N/A							NKAIN3			HSFX3
sp|Q92615|LAR4B_HUMAN	LARP4B	LAR4B_HUMAN La-related protein 4B	3	186.261	167.381	176.821	133.503	149.731	141.617	0.800906	-0.320295	152.321	151.449	151.885	0.858976	-0.21931	136.955	138.791	137.873	0.779732	-0.35895	139.421	155.241	147.331	0.833221	-0.263229	#N/A	#N/A	#N/A	#N/A	#N/A	#N/A	#N/A	#N/A	#N/A	#N/A	#N/A	#N/A	#N/A							NKAIN4			HSFX4
sp|P33991|MCM4_HUMAN	MCM4	MCM4_HUMAN DNA replication licensing factor MCM4	16	3731.02	4067.62	3899.32	3024.94	3222.38	3123.66	0.801078	-0.319985	3259.79	3555.68	3407.73	0.873931	-0.194409	3211.51	3162.41	3186.96	0.817312	-0.291042	2834.14	3081.34	2957.74	0.758527	-0.398727	#N/A	#N/A	#N/A	#N/A	#N/A	#N/A	#N/A	#N/A	MCM4	#N/A	#N/A	#N/A	#N/A							NKTR			HTATSF1
sp|Q8NC96|NECP1_HUMAN	NECAP1	NECP1_HUMAN Adaptin ear-binding coat-associated protein 1	2	461.303	423.381	442.342	372.722	335.991	354.356	0.801092	-0.319961	346.847	368.84	357.843	0.808975	-0.305833	386.146	358.214	372.18	0.841385	-0.249162	314.977	334.298	324.637	0.733906	-0.446333	#N/A	#N/A	#N/A	#N/A	#N/A	#N/A	#N/A	#N/A	#N/A	#N/A	#N/A	#N/A	#N/A							NLGN1			ICE1
sp|P35251|RFC1_HUMAN	RFC1	RFC1_HUMAN Replication factor C subunit 1	4	248.693	252.234	250.464	188.978	212.379	200.678	0.801229	-0.319714	190.678	225.155	207.916	0.830127	-0.268596	210.71	190.541	200.625	0.801017	-0.320095	185.346	214.247	199.797	0.797707	-0.326069	#N/A	#N/A	#N/A	#N/A	#N/A	#N/A	#N/A	#N/A	RFC1	#N/A	#N/A	#N/A	#N/A							NLGN2			ICE2
tr|E7EVA0|E7EVA0_HUMAN	MAP4	E7EVA0_HUMAN Microtubule-associated protein	20	6660.63	5672.96	6166.8	4802.15	5084.39	4943.27	0.801595	-0.319055	5471.26	5807.96	5639.61	0.914512	-0.128925	5679.03	5235.34	5457.18	0.884931	-0.176364	4749.48	4852.63	4801.06	0.778533	-0.361169	#N/A	#N/A	#N/A	#N/A	#N/A	#N/A	#N/A	#N/A	#N/A	#N/A	#N/A	#N/A	#N/A							NLGN3			ID3
sp|P16333-2|NCK1_HUMAN	NCK1	NCK1_HUMAN Isoform 2 of Cytoplasmic protein NCK1	1	283.588	283.862	283.725	211.877	243.021	227.449	0.801653	-0.31895	284.047	228.499	256.273	0.903244	-0.146812	249.882	242.162	246.022	0.867114	-0.205706	229.021	222.968	225.994	0.796527	-0.328206	#N/A	#N/A	#N/A	#N/A	#N/A	#N/A	#N/A	#N/A	#N/A	#N/A	#N/A	#N/A	#N/A							NLGN4X			ID4
sp|Q04323-2|UBXN1_HUMAN	UBXN1	UBXN1_HUMAN Isoform 2 of UBX domain-containing protein 1	2	206.817	210.973	208.895	164.443	170.56	167.502	0.801845	-0.318604	181.478	180.41	180.944	0.866196	-0.207235	191.304	198.916	195.11	0.93401	-0.0984902	149.644	130.736	140.19	0.671103	-0.575395	#N/A	#N/A	#N/A	#N/A	#N/A	#N/A	#N/A	#N/A	#N/A	UBXN1	#N/A	#N/A	#N/A							NLGN4Y			IFI35
sp|Q92841|DDX17_HUMAN	DDX17	DDX17_HUMAN Probable ATP-dependent RNA helicase DDX17	19	4997.2	5028.71	5012.95	3993.29	4049.41	4021.35	0.802192	-0.317981	3834.87	4812.67	4323.77	0.862519	-0.213372	4111.11	4033.42	4072.26	0.812348	-0.29983	4084.33	4345.79	4215.06	0.840833	-0.250108	#N/A	#N/A	#N/A	#N/A	#N/A	#N/A	#N/A	#N/A	#N/A	#N/A	#N/A	#N/A	#N/A							NMBR			IKZF2
sp|Q92900|RENT1_HUMAN	UPF1	RENT1_HUMAN Regulator of nonsense transcripts 1	18	2496.72	2651.79	2574.26	2017.43	2116.38	2066.91	0.802914	-0.316683	2374.06	2357.52	2365.79	0.919019	-0.121833	2363.51	2222.76	2293.14	0.890796	-0.166834	2026.46	2738.5	2382.48	0.925503	-0.111691	#N/A	#N/A	#N/A	#N/A	#N/A	#N/A	#N/A	#N/A	#N/A	#N/A	#N/A	#N/A	#N/A							NMUR1			IKZF4
sp|O15372|EIF3H_HUMAN	EIF3H	EIF3H_HUMAN Eukaryotic translation initiation factor 3 subunit H	7	615.359	683.737	649.548	528.239	514.933	521.586	0.802998	-0.316531	580.121	587.278	583.699	0.898624	-0.15421	571.322	583.798	577.56	0.889172	-0.169465	610.382	716.534	663.458	1.02141	0.030569	#N/A	#N/A	#N/A	#N/A	#N/A	#N/A	#N/A	#N/A	#N/A	EIF3H	#N/A	#N/A	#N/A							NMUR2			IKZF5
sp|Q92622|RUBIC_HUMAN	KIAA0226	RUBIC_HUMAN Run domain Beclin-1 interacting and cysteine-rich containing protein	1	29.1669	32.7287	30.9478	23.9352	25.7923	24.8637	0.803409	-0.315793	19.5192	19.2775	19.3984	0.626809	-0.673903	23.4698	22.7414	23.1056	0.746599	-0.421594	21.1172	40.3812	30.7492	0.993583	-0.00928798	#N/A	#N/A	#N/A	#N/A	#N/A	#N/A	#N/A	#N/A	#N/A	#N/A	#N/A	#N/A	#N/A							NOS1			IMP3
sp|Q99567|NUP88_HUMAN	NUP88	NUP88_HUMAN Nuclear pore complex protein Nup88	8	887.069	771.904	829.486	661.555	671.306	666.43	0.803425	-0.315764	762.947	765.359	764.153	0.921236	-0.118357	763.213	747.961	755.587	0.910909	-0.134621	708.472	570.272	639.372	0.770805	-0.375563	#N/A	#N/A	#N/A	#N/A	#N/A	#N/A	#N/A	#N/A	NUP88	#N/A	#N/A	#N/A	#N/A							NOX1			IMP4
sp|P12081|SYHC_HUMAN	HARS	SYHC_HUMAN Histidine--tRNA ligase, cytoplasmic	1	26.5149	29.2611	27.888	19.4904	25.3237	22.407	0.803466	-0.315692	27.3095	36.8352	32.0724	1.15004	0.201686	22.2564	25.6662	23.9613	0.859198	-0.218938	21.1927	17.6846	19.4386	0.697026	-0.520716	#N/A	#N/A	#N/A	#N/A	#N/A	#N/A	#N/A	#N/A	#N/A	#N/A	#N/A	#N/A	#N/A							NPBWR1			IMUP
sp|Q9NV58|RN19A_HUMAN	RNF19A	RN19A_HUMAN E3 ubiquitin-protein ligase RNF19A	1	94.3758	88.1401	91.2579	79.8654	66.78	73.3227	0.803466	-0.31569	86.9917	70.4982	78.7449	0.862883	-0.212763	90.6107	82.3881	86.4994	0.947856	-0.0772601	87.3653	125.113	106.239	1.16416	0.219293	#N/A	#N/A	#N/A	#N/A	#N/A	#N/A	#N/A	#N/A	#N/A	#N/A	#N/A	#N/A	#N/A							NPBWR2			ING1
sp|Q01151|CD83_HUMAN	CD83	CD83_HUMAN CD83 antigen	2	736.41	497.865	617.138	454.681	537.207	495.944	0.80362	-0.315415	662.535	479.816	571.175	0.925524	-0.111658	665.545	757.019	711.282	1.15255	0.20483	875.822	860.802	868.312	1.407	0.492622	#N/A	#N/A	#N/A	#N/A	#N/A	#N/A	#N/A	#N/A	#N/A	#N/A	#N/A	#N/A	#N/A							NPFFR1			ING3
sp|P33993|MCM7_HUMAN	MCM7	MCM7_HUMAN DNA replication licensing factor MCM7	14	1892.35	2071.36	1981.86	1601.88	1583.64	1592.76	0.803671	-0.315323	1618.63	1795.44	1707.04	0.861332	-0.215359	1638.84	1612.89	1625.87	0.820375	-0.285644	1551	1863.95	1707.47	0.861554	-0.214987	#N/A	#N/A	#N/A	#N/A	#N/A	#N/A	#N/A	#N/A	MCM7	#N/A	#N/A	#N/A	#N/A							NPFFR2			ING4
sp|Q15785|TOM34_HUMAN	TOMM34	TOM34_HUMAN Mitochondrial import receptor subunit TOM34	5	832.515	838.963	835.739	684.678	658.854	671.766	0.803799	-0.315094	725.759	731.488	728.624	0.871831	-0.197879	745.128	705.955	725.542	0.868144	-0.203994	598.868	562.493	580.681	0.694811	-0.525308	#N/A	#N/A	#N/A	#N/A	#N/A	#N/A	#N/A	#N/A	#N/A	#N/A	#N/A	#N/A	#N/A							NPHS1			ING5
sp|P49768|PSN1_HUMAN	PSEN1	PSN1_HUMAN Presenilin-1	11	1107.81	1137.33	1122.57	898.162	906.89	902.526	0.803982	-0.314765	948.544	827.629	888.087	0.791119	-0.338033	908.522	965.6	937.061	0.834746	-0.260591	833.918	1034.45	934.184	0.832183	-0.265027	#N/A	#N/A	#N/A	#N/A	#N/A	#N/A	#N/A	#N/A	#N/A	#N/A	#N/A	#N/A	#N/A							NPR2			INIP
sp|Q99933|BAG1_HUMAN	BAG1	BAG1_HUMAN BAG family molecular chaperone regulator 1	2	192.965	151.126	172.046	124.943	151.716	138.329	0.804029	-0.314681	147.756	155.693	151.725	0.881886	-0.181336	148.67	149.457	149.063	0.866419	-0.206863	126.433	134.591	130.512	0.75859	-0.398608	#N/A	#N/A	#N/A	#N/A	#N/A	#N/A	#N/A	#N/A	#N/A	#N/A	#N/A	#N/A	#N/A							NPTN			INKA2
sp|P42566|EPS15_HUMAN	EPS15	EPS15_HUMAN Epidermal growth factor receptor substrate 15	2	133.647	163.351	148.499	119.675	119.214	119.445	0.804345	-0.314113	149.141	155.273	152.207	1.02497	0.0355815	143.769	144.267	144.018	0.969825	-0.0442041	124.206	172.587	148.397	0.99931	-0.00099615	#N/A	#N/A	#N/A	#N/A	#N/A	#N/A	#N/A	#N/A	#N/A	#N/A	#N/A	#N/A	#N/A							NPY1R			INO80B
sp|P37198|NUP62_HUMAN	NUP62	NUP62_HUMAN Nuclear pore glycoprotein p62	9	1582.9	1456.78	1519.84	1194.86	1250.12	1222.49	0.804354	-0.314097	1349.66	1456.42	1403.04	0.92315	-0.115363	1364.06	1327.07	1345.57	0.885333	-0.175707	1174.63	1324.05	1249.34	0.822021	-0.282753	#N/A	#N/A	#N/A	#N/A	#N/A	#N/A	#N/A	#N/A	#N/A	#N/A	#N/A	#N/A	#N/A							NPY2R			INO80C
sp|Q09028|RBBP4_HUMAN	RBBP4	RBBP4_HUMAN Histone-binding protein RBBP4	9	1996.93	1986.01	1991.47	1593.41	1610.89	1602.15	0.804506	-0.313825	1787.62	1974.15	1880.88	0.944471	-0.0824221	1802.37	1762.11	1782.24	0.894937	-0.160142	1564.9	1893.73	1729.32	0.868361	-0.203633	#N/A	#N/A	#N/A	#N/A	#N/A	#N/A	#N/A	#N/A	RBBP4	#N/A	#N/A	#N/A	#N/A							NPY4R			INO80D
sp|P68371|TBB4B_HUMAN	TUBB4B	TBB4B_HUMAN Tubulin beta-4B chain	13	3829.09	3752.35	3790.72	3167.86	2936.2	3052.03	0.805132	-0.312703	3288.12	3410.74	3349.43	0.883587	-0.178556	3265.51	3024.52	3145.02	0.829662	-0.269405	2390.32	3253.41	2821.86	0.744414	-0.425823	#N/A	#N/A	#N/A	#N/A	#N/A	#N/A	#N/A	#N/A	#N/A	#N/A	#N/A	#N/A	#N/A							NPY4R2			INO80E
sp|P55795|HNRH2_HUMAN	HNRNPH2	HNRH2_HUMAN Heterogeneous nuclear ribonucleoprotein H2	17	3855.8	3996.61	3926.2	3037.42	3286.42	3161.92	0.805337	-0.312335	3199.26	3799.17	3499.22	0.891246	-0.166104	3151.58	2981.28	3066.43	0.781016	-0.356575	3130.54	3561.54	3346.04	0.852233	-0.230681	#N/A	#N/A	#N/A	#N/A	#N/A	#N/A	#N/A	#N/A	HNRNPH2	#N/A	#N/A	#N/A	#N/A							NPY5R			INSM1
sp|Q8TEQ6|GEMI5_HUMAN	GEMIN5	GEMI5_HUMAN Gem-associated protein 5	2	92.8994	113.643	103.271	86.5854	79.7617	83.1736	0.80539	-0.312241	90.3987	100.11	95.2544	0.922371	-0.116581	93.3059	96.1148	94.7104	0.917103	-0.124844	83.4587	116.68	100.069	0.968996	-0.0454378	#N/A	#N/A	#N/A	#N/A	#N/A	#N/A	#N/A	#N/A	#N/A	#N/A	#N/A	#N/A	#N/A							NRAC			INTS1
sp|P33240|CSTF2_HUMAN	CSTF2	CSTF2_HUMAN Cleavage stimulation factor subunit 2	3	325.504	301.391	313.447	247.937	257.049	252.493	0.805535	-0.31198	286.64	299	292.82	0.934192	-0.0982097	286.988	246.93	266.959	0.851686	-0.231606	239.981	246.816	243.399	0.776521	-0.364904	#N/A	#N/A	#N/A	#N/A	#N/A	#N/A	#N/A	#N/A	CSTF2	#N/A	#N/A	#N/A	#N/A							NRN1			INTS10
sp|P49023-3|PAXI_HUMAN	PXN	PAXI_HUMAN Isoform Gamma of Paxillin	6	1292.3	1371.32	1331.81	1092.1	1054.32	1073.21	0.805828	-0.311456	1254.04	1262.5	1258.27	0.944782	-0.0819467	1202.21	1116.38	1159.3	0.870466	-0.200141	969.062	1205.94	1087.5	0.816559	-0.292372	#N/A	#N/A	#N/A	#N/A	#N/A	#N/A	#N/A	#N/A	#N/A	#N/A	#N/A	#N/A	#N/A							NRN1L			INTS12
sp|Q8N7H5|PAF1_HUMAN	PAF1	PAF1_HUMAN RNA polymerase II-associated factor 1 homolog	2	233.088	241.369	237.228	189.662	192.831	191.246	0.80617	-0.310844	216.315	243.789	230.052	0.969749	-0.0443173	211.788	204.661	208.225	0.877738	-0.188138	236.376	257.15	246.763	1.04019	0.0568487	#N/A	#N/A	#N/A	#N/A	#N/A	#N/A	#N/A	#N/A	PAF1	#N/A	#N/A	#N/A	#N/A							NRXN1			INTS14
sp|P27105|STOM_HUMAN	STOM	STOM_HUMAN Erythrocyte band 7 integral membrane protein	35	8628.63	9571.42	9100.02	7372.34	7307.03	7339.68	0.806557	-0.310152	8087.63	5944.99	7016.31	0.771021	-0.375158	7489.37	9325.12	8407.25	0.923871	-0.114237	8372.25	8776.8	8574.52	0.942253	-0.0858138	#N/A	#N/A	#N/A	#N/A	#N/A	#N/A	#N/A	#N/A	#N/A	#N/A	#N/A	#N/A	#N/A							NRXN1			INTS4
sp|Q9UKY7|CDV3_HUMAN	CDV3	CDV3_HUMAN Protein CDV3 homolog	1	52.3008	52.873	52.5869	42.5668	42.2929	42.4299	0.806852	-0.309624	47.1888	47.4477	47.3182	0.899811	-0.152307	49.6941	47.6522	48.6731	0.925576	-0.111577	46.3426	49.4844	47.9135	0.91113	-0.134271	#N/A	#N/A	#N/A	#N/A	#N/A	#N/A	#N/A	#N/A	#N/A	CDV3	#N/A	#N/A	#N/A							NT5E			INTS6
sp|Q9ULX6|AKP8L_HUMAN	AKAP8L	AKP8L_HUMAN A-kinase anchor protein 8-like	2	224.702	233.159	228.93	181.537	188.02	184.779	0.807138	-0.309113	197.903	217.452	207.678	0.907164	-0.140565	217.704	185.23	201.467	0.880036	-0.184366	172.379	235.278	203.828	0.890351	-0.167554	#N/A	#N/A	#N/A	#N/A	#N/A	#N/A	#N/A	#N/A	#N/A	#N/A	#N/A	#N/A	#N/A							NTM			INTS8
sp|Q14978-2|NOLC1_HUMAN	NOLC1	NOLC1_HUMAN Isoform Beta of Nucleolar and coiled-body phosphoprotein 1	2	587.734	555.293	571.514	444.4	478.377	461.389	0.80731	-0.308806	461.998	582.08	522.039	0.913432	-0.13063	429.914	377.629	403.772	0.706495	-0.501248	447.6	391.803	419.702	0.734368	-0.445424	#N/A	#N/A	#N/A	#N/A	#N/A	#N/A	#N/A	#N/A	#N/A	#N/A	#N/A	#N/A	#N/A							NTNG1			INTS9
sp|Q9BSJ2-4|GCP2_HUMAN	TUBGCP2	GCP2_HUMAN Isoform 3 of Gamma-tubulin complex component 2	1	154.18	134.159	144.169	117.695	115.192	116.444	0.807685	-0.308136	146.918	154.874	150.896	1.04666	0.0657886	131.025	128.812	129.918	0.901151	-0.150159	119.186	66.6238	92.9049	0.644414	-0.633939	#N/A	#N/A	#N/A	#N/A	#N/A	#N/A	#N/A	#N/A	#N/A	#N/A	#N/A	#N/A	#N/A							NTNG2			IP6K2
sp|Q16531|DDB1_HUMAN	DDB1	DDB1_HUMAN DNA damage-binding protein 1	22	5131.91	5585.63	5358.77	4275.9	4383.3	4329.6	0.807947	-0.307668	4719.73	5025.02	4872.38	0.909234	-0.137277	4832.01	4848.38	4840.19	0.903229	-0.146837	4280.72	5688.18	4984.45	0.930148	-0.104468	#N/A	#N/A	#N/A	#N/A	#N/A	#N/A	#N/A	#N/A	#N/A	#N/A	#N/A	#N/A	#N/A							NTSR1			IPMK
sp|O95999|BCL10_HUMAN	BCL10	BCL10_HUMAN B-cell lymphoma/leukemia 10	1	171.874	201.757	186.815	149.632	152.324	150.978	0.808166	-0.307276	165.3	174.722	170.011	0.910048	-0.135986	167.2	161.763	164.481	0.880449	-0.183689	151.023	176.099	163.561	0.875522	-0.191785	#N/A	#N/A	#N/A	#N/A	#N/A	#N/A	#N/A	#N/A	#N/A	#N/A	#N/A	#N/A	#N/A							NTSR2			IRF2
sp|P62875|RPAB5_HUMAN	POLR2L	RPAB5_HUMAN DNA-directed RNA polymerases I, II, and III subunit RPABC5	5	1644.08	1441.94	1543.01	1347.42	1147.05	1247.24	0.808313	-0.307014	1589.07	1327.51	1458.29	0.945094	-0.0814698	1331.47	1259.91	1295.69	0.839716	-0.252027	1131.13	1209.62	1170.38	0.758501	-0.398777	#N/A	#N/A	#N/A	#N/A	#N/A	#N/A	#N/A	#N/A	POLR2L	#N/A	#N/A	#N/A	#N/A							OCLN			IRF2BP1
sp|Q6P1L8|RM14_HUMAN	MRPL14	RM14_HUMAN 39S ribosomal protein L14, mitochondrial	6	927.837	1030.53	979.183	759.605	824.005	791.805	0.808638	-0.306434	851.158	826.587	838.872	0.856706	-0.223128	910.598	890.953	900.775	0.919925	-0.120412	884.682	974.233	929.457	0.949217	-0.0751903	#N/A	#N/A	#N/A	#N/A	MRPL14	#N/A	#N/A	#N/A	#N/A	#N/A	#N/A	#N/A	#N/A							OMG			IRF2BPL
sp|P48634|PRC2A_HUMAN	PRRC2A	PRC2A_HUMAN Protein PRRC2A	1	85.4094	84.1428	84.7761	73.1649	64.0603	68.6126	0.809339	-0.305184	78.1225	89.0468	83.5847	0.985946	-0.0204196	80.6379	67.5409	74.0894	0.873942	-0.19439	64.3728	97.2309	80.8019	0.953121	-0.0692693	#N/A	#N/A	#N/A	#N/A	#N/A	#N/A	#N/A	#N/A	#N/A	#N/A	#N/A	#N/A	#N/A							OPALIN			IRF4
sp|Q5VT52|RPRD2_HUMAN	RPRD2	RPRD2_HUMAN Regulation of nuclear pre-mRNA domain-containing protein 2	19	2887.93	3142.82	3015.38	2279.7	2601.97	2440.84	0.809463	-0.304963	2770.81	3079.36	2925.09	0.970057	-0.0438589	3005.93	2769.78	2887.86	0.95771	-0.0623391	2631.2	3282.53	2956.86	0.980596	-0.0282691	#N/A	#N/A	#N/A	#N/A	#N/A	#N/A	#N/A	#N/A	#N/A	#N/A	#N/A	#N/A	#N/A							OPCML			IRX1
sp|P62857|RS28_HUMAN	RPS28	RS28_HUMAN 40S ribosomal protein S28	8	1157.82	1105.47	1131.64	921.361	911.575	916.468	0.809855	-0.304265	941.982	1062.48	1002.23	0.885641	-0.175206	1000.74	952.437	976.589	0.862981	-0.212599	849.131	775.656	812.393	0.717887	-0.478171	#N/A	#N/A	#N/A	#N/A	#N/A	#N/A	#N/A	#N/A	#N/A	#N/A	#N/A	#N/A	#N/A							OPN1MW			IRX2
sp|P20290|BTF3_HUMAN	BTF3	BTF3_HUMAN Transcription factor BTF3	14	4403.59	3516.3	3959.95	3053.81	3361.59	3207.7	0.810037	-0.303941	3446.65	3858.66	3652.65	0.9224	-0.116535	3748.59	3670.8	3709.7	0.936805	-0.0941798	3134.89	2265.64	2700.26	0.681895	-0.552379	#N/A	#N/A	#N/A	#N/A	#N/A	#N/A	#N/A	#N/A	#N/A	#N/A	#N/A	#N/A	#N/A							OPN1MW2			IRX3
sp|P05387|RLA2_HUMAN	RPLP2	RLA2_HUMAN 60S acidic ribosomal protein P2	20	6727.32	6540.03	6633.67	4981.49	5765.82	5373.65	0.810057	-0.303905	6880.51	6089.47	6484.99	0.977586	-0.032704	5775.8	5560.3	5668.05	0.854436	-0.226956	5214.67	4559.24	4886.95	0.736689	-0.440873	#N/A	#N/A	#N/A	#N/A	#N/A	#N/A	#N/A	#N/A	#N/A	#N/A	#N/A	#N/A	#N/A							OPN1MW3			IRX4
sp|O94992|HEXI1_HUMAN	HEXIM1	HEXI1_HUMAN Protein HEXIM1	1	120.578	107.457	114.017	91.82	92.9316	92.3758	0.81019	-0.303668	99.9305	110.258	105.094	0.921738	-0.117572	102.956	106.819	104.888	0.919925	-0.120413	101.351	118.849	110.1	0.965641	-0.0504408	#N/A	#N/A	#N/A	#N/A	#N/A	#N/A	#N/A	#N/A	#N/A	#N/A	#N/A	#N/A	#N/A							OPN4			IRX5
sp|Q9NP97|DLRB1_HUMAN	DYNLRB1	DLRB1_HUMAN Dynein light chain roadblock-type 1	7	2033.65	1861.08	1947.37	1609.84	1547.94	1578.89	0.810783	-0.302613	1896.02	1844.08	1870.05	0.960298	-0.0584465	1821.5	1588.3	1704.9	0.875491	-0.191836	1411.93	1305.01	1358.47	0.697594	-0.519541	#N/A	#N/A	#N/A	#N/A	#N/A	#N/A	#N/A	#N/A	#N/A	#N/A	#N/A	#N/A	#N/A							OPRD1			IRX6
sp|P11802|CDK4_HUMAN	CDK4	CDK4_HUMAN Cyclin-dependent kinase 4	1	125.812	117.191	121.501	96.8731	100.189	98.531	0.810945	-0.302324	130.178	117.147	123.662	1.01779	0.025434	107.743	108.611	108.177	0.890335	-0.16758	99.6233	110.745	105.184	0.865702	-0.208057	#N/A	#N/A	#N/A	#N/A	#N/A	#N/A	#N/A	#N/A	#N/A	#N/A	#N/A	#N/A	#N/A							OPRK1			ISG20L2
sp|P62263|RS14_HUMAN	RPS14	RS14_HUMAN 40S ribosomal protein S14	9	2064.35	2149.08	2106.72	1643.8	1773.84	1708.82	0.81113	-0.301995	1871.06	1961.31	1916.18	0.909561	-0.136758	1734.22	1721.26	1727.74	0.820111	-0.286109	1569.38	1571.86	1570.62	0.74553	-0.423661	#N/A	#N/A	#N/A	#N/A	#N/A	#N/A	#N/A	#N/A	#N/A	#N/A	#N/A	#N/A	#N/A							OR10A2			ISL1
sp|Q9Y2D5-4|AKAP2_HUMAN	AKAP2	AKAP2_HUMAN Isoform 2 of A-kinase anchor protein 2	3	220.736	189.825	205.28	163.219	169.848	166.534	0.811249	-0.301784	186.471	164.716	175.594	0.855383	-0.225357	159.113	164.482	161.798	0.788178	-0.343407	160.769	187.037	173.903	0.847148	-0.239314	#N/A	#N/A	#N/A	#N/A	#N/A	#N/A	#N/A	#N/A	#N/A	#N/A	#N/A	#N/A	#N/A							OR10A3			ISL2
sp|P26368|U2AF2_HUMAN	U2AF2	U2AF2_HUMAN Splicing factor U2AF 65 kDa subunit	7	1260.35	1251.21	1255.78	976.159	1061.55	1018.85	0.811332	-0.301636	980.715	1424.24	1202.48	0.957554	-0.0625738	1015.36	1017.89	1016.62	0.809557	-0.304796	1077.78	1015	1046.39	0.833259	-0.263163	#N/A	#N/A	#N/A	#N/A	#N/A	#N/A	#N/A	#N/A	U2AF2	#N/A	#N/A	#N/A	#N/A							OR10A4			ISX
sp|Q9H9Q2|CSN7B_HUMAN	COPS7B	CSN7B_HUMAN COP9 signalosome complex subunit 7b	1	18.1451	32.3679	25.2565	23.6806	17.3049	20.4928	0.811385	-0.301541	18.8099	15.1271	16.9685	0.671847	-0.573796	17.581	21.8965	19.7387	0.781531	-0.355624	20.1974	23.2366	21.717	0.859858	-0.21783	#N/A	#N/A	#N/A	#N/A	#N/A	#N/A	#N/A	#N/A	#N/A	#N/A	#N/A	#N/A	#N/A							OR10A5			ISY1
sp|P23193|TCEA1_HUMAN	TCEA1	TCEA1_HUMAN Transcription elongation factor A protein 1	1	139.686	130.014	134.85	112.86	106.042	109.451	0.81165	-0.30107	109.12	123.73	116.425	0.863367	-0.211955	136.505	104.546	120.525	0.893775	-0.162017	129.639	98.7342	114.187	0.846768	-0.239962	#N/A	#N/A	#N/A	#N/A	#N/A	#N/A	#N/A	#N/A	TCEA1	#N/A	#N/A	#N/A	#N/A							OR10A6			IWS1
sp|Q53RT3|APRV1_HUMAN	ASPRV1	APRV1_HUMAN Retroviral-like aspartic protease 1	1	98.4487	38.5991	68.5239	47.9219	63.3449	55.6334	0.811883	-0.300656	85.196	2988.31	1536.75	22.4265	4.48713	63.5138	110.843	87.1784	1.27223	0.347363	577.675	77.7758	327.725	4.78264	2.25781	#N/A	#N/A	#N/A	#N/A	#N/A	#N/A	#N/A	#N/A	#N/A	#N/A	#N/A	#N/A	#N/A							OR10A7			JARID2
sp|Q05682|CALD1_HUMAN	CALD1	CALD1_HUMAN Caldesmon	13	2057.93	1949.41	2003.67	1575.09	1678.83	1626.96	0.81199	-0.300466	1744.25	1849.96	1797.11	0.896907	-0.15697	1824.8	1772.27	1798.53	0.89762	-0.155823	1705.22	1680.78	1693	0.84495	-0.243063	#N/A	#N/A	#N/A	#N/A	#N/A	#N/A	#N/A	#N/A	#N/A	#N/A	#N/A	#N/A	#N/A							OR10AC1			JAZF1
sp|P54105|ICLN_HUMAN	CLNS1A	ICLN_HUMAN Methylosome subunit pICln	3	412.939	460.289	436.614	370.002	339.133	354.567	0.812085	-0.300298	372.497	408.875	390.686	0.894809	-0.160349	402.296	416.949	409.623	0.93818	-0.0920634	364.485	399.767	382.126	0.875203	-0.19231	#N/A	#N/A	#N/A	#N/A	#N/A	#N/A	#N/A	#N/A	#N/A	#N/A	#N/A	#N/A	#N/A							OR10AD1			JDP2
sp|Q9NY26|S39A1_HUMAN	SLC39A1	S39A1_HUMAN Zinc transporter ZIP1	3	424.782	527.491	476.136	402.208	371.164	386.686	0.812133	-0.300213	415.292	331.823	373.558	0.78456	-0.350045	425.106	478.581	451.844	0.948979	-0.0755521	373.546	483.299	428.423	0.899789	-0.152341	#N/A	#N/A	#N/A	#N/A	#N/A	#N/A	#N/A	#N/A	#N/A	#N/A	#N/A	#N/A	#N/A							OR10AG1			JMJD1C
sp|Q15365|PCBP1_HUMAN	PCBP1	PCBP1_HUMAN Poly(rC)-binding protein 1	8	1301.91	1370.31	1336.11	1102.85	1067.83	1085.34	0.812313	-0.299892	1257.08	1254.1	1255.59	0.939736	-0.0896733	1231.8	1123.32	1177.56	0.881335	-0.182238	1144.75	1290.25	1217.5	0.911227	-0.134117	#N/A	#N/A	#N/A	#N/A	#N/A	#N/A	#N/A	#N/A	#N/A	#N/A	#N/A	#N/A	#N/A							OR10C1			JRK
sp|Q9H4A3-6|WNK1_HUMAN	WNK1	WNK1_HUMAN Isoform 5 of Serine/threonine-protein kinase WNK1	4	692.939	673.117	683.028	571.039	539.08	555.06	0.812645	-0.299302	661.158	647.745	654.452	0.958162	-0.0616584	639.253	544.581	591.917	0.866607	-0.20655	487.892	764.967	626.429	0.917136	-0.124793	#N/A	#N/A	#N/A	#N/A	#N/A	#N/A	#N/A	#N/A	#N/A	WNK1	#N/A	#N/A	#N/A							OR10D3			JRKL
sp|Q9BUH8|BEGIN_HUMAN	BEGAIN	BEGIN_HUMAN Brain-enriched guanylate kinase-associated protein	1	134.851	126.107	130.479	106.336	105.744	106.04	0.812698	-0.299209	106.709	124.208	115.459	0.884882	-0.176443	111.835	112.027	111.931	0.857847	-0.221208	101.892	103.474	102.683	0.78697	-0.34562	#N/A	#N/A	#N/A	#N/A	#N/A	#N/A	#N/A	#N/A	#N/A	#N/A	#N/A	#N/A	#N/A							OR10D4P			JUN
sp|O43670-4|ZN207_HUMAN	ZNF207	ZN207_HUMAN Isoform 4 of Zinc finger protein 207	3	960.104	929.535	944.82	734.843	800.979	767.911	0.812759	-0.2991	746.398	972.991	859.695	0.909903	-0.136215	826.718	775.702	801.21	0.848003	-0.237858	758.009	728.446	743.227	0.786634	-0.346235	#N/A	#N/A	#N/A	#N/A	#N/A	#N/A	#N/A	#N/A	#N/A	#N/A	#N/A	#N/A	#N/A							OR10G2			JUNB
sp|Q96RE7|NACC1_HUMAN	NACC1	NACC1_HUMAN Nucleus accumbens-associated protein 1	1	16.7421	14.031	15.3865	13.013	12.002	12.5075	0.812885	-0.298876	15.3085	13.1447	14.2266	0.924613	-0.113079	21.6238	14.6785	18.1512	1.17968	0.238391	10.5342	11.8406	11.1874	0.72709	-0.459795	#N/A	#N/A	#N/A	#N/A	#N/A	#N/A	#N/A	#N/A	#N/A	#N/A	#N/A	#N/A	#N/A							OR10G3			JUND
sp|Q9NUQ8|ABCF3_HUMAN	ABCF3	ABCF3_HUMAN ATP-binding cassette sub-family F member 3	2	185.857	188.907	187.382	154.953	149.719	152.336	0.81297	-0.298725	170.006	157.651	163.829	0.874302	-0.193796	173.303	160.082	166.692	0.889587	-0.168793	135.933	175.975	155.954	0.832278	-0.264862	#N/A	#N/A	#N/A	#N/A	#N/A	#N/A	#N/A	#N/A	#N/A	#N/A	#N/A	#N/A	#N/A							OR10G4			KANSL1
sp|Q8N3U4-2|STAG2_HUMAN	STAG2	STAG2_HUMAN Isoform 2 of Cohesin subunit SA-2	2	85.2846	87.4549	86.3697	62.0101	78.4222	70.2161	0.812972	-0.298723	86.8486	100.765	93.8068	1.08611	0.119166	88.3155	90.0644	89.19	1.03265	0.046355	71.7758	84.8223	78.299	0.906556	-0.141531	#N/A	#N/A	#N/A	#N/A	#N/A	#N/A	#N/A	#N/A	STAG2	#N/A	#N/A	#N/A	#N/A							OR10G6			KANSL2
sp|P33992|MCM5_HUMAN	MCM5	MCM5_HUMAN DNA replication licensing factor MCM5	13	1930.21	2058.75	1994.48	1609.42	1634.45	1621.93	0.813212	-0.298297	1611.32	1885.47	1748.39	0.876617	-0.189981	1640.75	1656.72	1648.74	0.826649	-0.274653	1526.2	1803.08	1664.64	0.834624	-0.260802	#N/A	#N/A	#N/A	#N/A	#N/A	#N/A	#N/A	#N/A	#N/A	#N/A	#N/A	#N/A	#N/A							OR10G7			KANSL3
sp|P30825|CTR1_HUMAN	SLC7A1	CTR1_HUMAN High affinity cationic amino acid transporter 1	4	586.015	878.375	732.195	596.548	594.409	595.478	0.813279	-0.298179	969.015	634.657	801.836	1.09511	0.131079	654.267	905.264	779.765	1.06497	0.0908124	671.538	1373.08	1022.31	1.39623	0.481531	#N/A	#N/A	#N/A	#N/A	#N/A	SLC7A1	#N/A	#N/A	#N/A	#N/A	#N/A	#N/A	#N/A							OR10G8			KAT6A
sp|P62269|RS18_HUMAN	RPS18	RS18_HUMAN 40S ribosomal protein S18	9	3299.88	3534.2	3417.04	2647.85	2914.22	2781.03	0.813873	-0.297125	2775.76	2973.56	2874.66	0.841272	-0.249356	2605.33	2625.09	2615.21	0.765344	-0.38582	2479.96	2295.17	2387.57	0.698723	-0.517207	#N/A	#N/A	#N/A	#N/A	#N/A	#N/A	#N/A	#N/A	#N/A	RPS18	#N/A	#N/A	#N/A							OR10G9			KAT6B
sp|P61247|RS3A_HUMAN	RPS3A	RS3A_HUMAN 40S ribosomal protein S3a	19	6515.16	5949.98	6232.57	5076.13	5076.6	5076.36	0.81449	-0.296031	5457.72	6084.01	5770.86	0.925921	-0.11104	5430.39	5303.77	5367.08	0.861134	-0.21569	5047.65	4414.42	4731.03	0.759083	-0.397671	#N/A	#N/A	#N/A	#N/A	#N/A	#N/A	#N/A	#N/A	#N/A	#N/A	#N/A	#N/A	#N/A							OR10H1			KAT8
sp|Q9H1C7|CYTM1_HUMAN	CYSTM1	CYTM1_HUMAN Cysteine-rich and transmembrane domain-containing protein 1	1	124.868	119.099	121.983	106.486	92.2683	99.3772	0.814677	-0.2957	100.929	84.7192	92.8241	0.760956	-0.394115	87.4244	101.534	94.4792	0.774524	-0.368617	86.5574	152.612	119.585	0.980335	-0.0286532	#N/A	#N/A	#N/A	#N/A	#N/A	#N/A	#N/A	#N/A	#N/A	#N/A	#N/A	#N/A	#N/A							OR10H2			KCTD1
sp|Q15029|U5S1_HUMAN	EFTUD2	U5S1_HUMAN 116 kDa U5 small nuclear ribonucleoprotein component	7	1476.19	1387.74	1431.97	1186.67	1146.77	1166.72	0.814769	-0.295538	1367.09	1388.15	1377.62	0.962049	-0.0558182	1341.66	1375.96	1358.81	0.948913	-0.0756525	1178.11	1042.02	1110.07	0.775204	-0.367352	#N/A	#N/A	#N/A	#N/A	#N/A	#N/A	#N/A	#N/A	EFTUD2	#N/A	#N/A	#N/A	#N/A							OR10H3			KCTD10
sp|O43592|XPOT_HUMAN	XPOT	XPOT_HUMAN Exportin-T	4	622.281	627.201	624.741	516.701	502.075	509.388	0.815359	-0.294493	633.854	623.589	628.722	1.00637	0.00916289	596.044	623.234	609.639	0.975827	-0.035303	528.828	572.883	550.856	0.881734	-0.181584	#N/A	#N/A	#N/A	#N/A	#N/A	#N/A	#N/A	#N/A	#N/A	#N/A	#N/A	#N/A	#N/A							OR10H4			KCTD13
sp|Q12959-2|DLG1_HUMAN	DLG1	DLG1_HUMAN Isoform 2 of Disks large homolog 1	2	169.755	199.019	184.387	148.901	151.784	150.343	0.815364	-0.294484	148.079	161.617	154.848	0.839799	-0.251884	202.467	197.961	200.214	1.08584	0.118806	201.896	219.579	210.738	1.14291	0.19271	#N/A	#N/A	#N/A	#N/A	#N/A	#N/A	#N/A	#N/A	#N/A	#N/A	#N/A	#N/A	#N/A							OR10H5			KDM1A
sp|P52789|HXK2_HUMAN	HK2	HXK2_HUMAN Hexokinase-2	4	262.094	298.451	280.273	226.117	230.971	228.544	0.815435	-0.294358	233.136	251.247	242.192	0.864129	-0.210682	238.403	241.464	239.933	0.856072	-0.224196	218.093	263.833	240.963	0.859745	-0.218019	#N/A	#N/A	#N/A	#N/A	#N/A	#N/A	#N/A	#N/A	#N/A	#N/A	#N/A	#N/A	#N/A							OR10J1			KDM1B
sp|Q9UNZ2-5|NSF1C_HUMAN	NSFL1C	NSF1C_HUMAN Isoform 3 of NSFL1 cofactor p47	2	57.4665	47.7012	52.5838	39.1877	46.6038	42.8957	0.815759	-0.293785	46.2522	57.581	51.9166	0.987311	-0.0184239	59.2503	41.9517	50.601	0.962292	-0.0554539	33.5005	49.5203	41.5104	0.789413	-0.341147	#N/A	#N/A	#N/A	#N/A	#N/A	#N/A	#N/A	#N/A	#N/A	#N/A	#N/A	#N/A	#N/A							OR10J3			KDM2A
sp|P55884-2|EIF3B_HUMAN	EIF3B	EIF3B_HUMAN Isoform 2 of Eukaryotic translation initiation factor 3 subunit B	18	2728.85	3045.91	2887.38	2344.66	2366.67	2355.66	0.815849	-0.293627	2450.69	2599.12	2524.9	0.874462	-0.193532	2429.99	2492.2	2461.09	0.852363	-0.230461	2141.9	2825.59	2483.74	0.860207	-0.217244	#N/A	#N/A	#N/A	#N/A	#N/A	#N/A	#N/A	#N/A	#N/A	EIF3B	#N/A	#N/A	#N/A							OR10J4			KDM2B
sp|Q01105-2|SET_HUMAN	SET	SET_HUMAN Isoform 2 of Protein SET	11	2067.03	1631.81	1849.42	1544.17	1474.05	1509.11	0.815991	-0.293375	1703.5	2157.41	1930.45	1.04382	0.061868	1682.59	1600.93	1641.76	0.887716	-0.17183	1459.88	1437.9	1448.89	0.783429	-0.352125	#N/A	#N/A	#N/A	#N/A	#N/A	#N/A	#N/A	#N/A	#N/A	#N/A	#N/A	#N/A	#N/A							OR10J5			KDM3B
sp|Q99808|S29A1_HUMAN	SLC29A1	S29A1_HUMAN Equilibrative nucleoside transporter 1	4	178.071	217.997	198.034	161.114	162.142	161.628	0.816163	-0.293071	163.394	161.306	162.35	0.819809	-0.286641	164.712	177.74	171.226	0.864629	-0.209846	201.257	288.739	244.998	1.23715	0.307022	#N/A	#N/A	#N/A	#N/A	#N/A	SLC29A1	#N/A	#N/A	#N/A	#N/A	#N/A	#N/A	#N/A							OR10J6P			KDM4A
sp|Q16342|PDCD2_HUMAN	PDCD2	PDCD2_HUMAN Programmed cell death protein 2	5	616.639	595.416	606.028	489.776	499.548	494.662	0.816237	-0.29294	562.453	564.067	563.26	0.92943	-0.105582	549.556	616.526	583.041	0.96207	-0.0557859	449.852	461.825	455.838	0.752175	-0.41086	#N/A	#N/A	#N/A	#N/A	#N/A	#N/A	#N/A	#N/A	PDCD2	#N/A	#N/A	#N/A	#N/A							OR10K1			KDM4B
sp|Q9GZZ1|NAA50_HUMAN	NAA50	NAA50_HUMAN N-alpha-acetyltransferase 50	1	30.2335	21.8631	26.0483	22.6401	19.8856	21.2629	0.816286	-0.292854	24.7284	23.349	24.0387	0.922851	-0.11583	25.6376	25.9171	25.7773	0.989598	-0.0150853	26.7447	23.453	25.0988	0.96355	-0.053568	#N/A	#N/A	#N/A	#N/A	#N/A	#N/A	#N/A	#N/A	#N/A	#N/A	#N/A	#N/A	#N/A							OR10K2			KDM4C
sp|O75175|CNOT3_HUMAN	CNOT3	CNOT3_HUMAN CCR4-NOT transcription complex subunit 3	1	203.808	208.118	205.963	170.753	165.539	168.146	0.816389	-0.292671	192.933	202.345	197.639	0.959585	-0.0595175	213.406	190.642	202.024	0.980875	-0.0278585	164.679	224.06	194.37	0.943711	-0.0835833	#N/A	#N/A	#N/A	#N/A	#N/A	#N/A	#N/A	#N/A	#N/A	#N/A	#N/A	#N/A	#N/A							OR10P1			KDM4D
sp|Q96JA1|LRIG1_HUMAN	LRIG1	LRIG1_HUMAN Leucine-rich repeats and immunoglobulin-like domains protein 1	1	64.6066	72.8958	68.7512	57.5893	54.6897	56.1395	0.81656	-0.292369	74.675	61.5171	68.096	0.990471	-0.0138138	82.2644	82.0799	82.1721	1.19521	0.257265	77.7306	93.3174	85.524	1.24396	0.314944	#N/A	#N/A	#N/A	#N/A	#N/A	LRIG1	#N/A	#N/A	#N/A	#N/A	#N/A	#N/A	#N/A							OR10Q1			KDM4E
sp|P36507|MP2K2_HUMAN	MAP2K2	MP2K2_HUMAN Dual specificity mitogen-activated protein kinase kinase 2	7	1865.75	2175.49	2020.62	1731.12	1569.25	1650.18	0.816673	-0.29217	1815.71	1756.99	1786.35	0.88406	-0.177783	1793	1710.14	1751.57	0.866848	-0.206149	1431.86	2352.73	1892.3	0.936492	-0.094661	#N/A	#N/A	#N/A	#N/A	#N/A	#N/A	#N/A	#N/A	#N/A	#N/A	#N/A	#N/A	#N/A							OR10R2			KDM5A
sp|Q01844-5|EWS_HUMAN	EWSR1	EWS_HUMAN Isoform 5 of RNA-binding protein EWS	2	693.831	585.655	639.743	557.892	487.193	522.543	0.816801	-0.291944	493.715	719.705	606.71	0.948365	-0.0764854	593.818	554.967	574.392	0.897849	-0.155456	496.92	580.435	538.678	0.842022	-0.248071	#N/A	#N/A	#N/A	#N/A	#N/A	#N/A	#N/A	#N/A	#N/A	#N/A	#N/A	#N/A	#N/A							OR10S1			KDM5B
sp|O60563|CCNT1_HUMAN	CCNT1	CCNT1_HUMAN Cyclin-T1	1	63.1331	70.0096	66.5713	54.8553	53.9291	54.3922	0.817051	-0.291502	47.9188	55.6367	51.7777	0.777778	-0.362569	52.4312	56.8259	54.6285	0.820602	-0.285246	63.7956	59.7593	61.7775	0.927989	-0.107821	#N/A	#N/A	#N/A	#N/A	#N/A	#N/A	#N/A	#N/A	CCNT1	#N/A	#N/A	#N/A	#N/A							OR10T2			KDM5C
sp|O00499|BIN1_HUMAN	BIN1	BIN1_HUMAN Myc box-dependent-interacting protein 1	3	378.88	334.954	356.917	288.251	295.295	291.773	0.817481	-0.290742	349.492	335.671	342.582	0.959835	-0.0591414	313.997	331.761	322.879	0.904633	-0.144595	348.313	290.906	319.61	0.895473	-0.159278	#N/A	#N/A	#N/A	#N/A	#N/A	#N/A	#N/A	#N/A	#N/A	#N/A	#N/A	#N/A	#N/A							OR10V1			KDM5D
sp|Q9Y3B4|PM14_HUMAN	SF3B14	PM14_HUMAN Pre-mRNA branch site protein p14	2	509.51	542.023	525.766	432.542	427.217	429.88	0.817624	-0.29049	458.992	532.208	495.6	0.942624	-0.085246	460.582	456.623	458.602	0.872255	-0.197178	464.256	413.029	438.642	0.834291	-0.261377	#N/A	#N/A	#N/A	#N/A	#N/A	#N/A	#N/A	#N/A	#N/A	#N/A	#N/A	#N/A	#N/A							OR10W1			KDM6A
sp|Q99471|PFD5_HUMAN	PFDN5	PFD5_HUMAN Prefoldin subunit 5	5	1592.95	1500.05	1546.5	1231.69	1297.82	1264.76	0.817818	-0.290149	1504.52	1450.06	1477.29	0.955247	-0.0660538	1400.98	1392.19	1396.59	0.903062	-0.147103	1243.4	1021.89	1132.64	0.732392	-0.449311	#N/A	#N/A	#N/A	#N/A	#N/A	#N/A	#N/A	#N/A	#N/A	#N/A	#N/A	#N/A	#N/A							OR10X1			KDM6B
sp|P62241|RS8_HUMAN	RPS8	RS8_HUMAN 40S ribosomal protein S8	18	5299.06	5170.3	5234.68	4197.69	4364.93	4281.31	0.817874	-0.290049	4511.77	5197.54	4854.66	0.927402	-0.108733	4559.36	4398.94	4479.15	0.855668	-0.224876	4176.4	4078.57	4127.48	0.788489	-0.342838	#N/A	#N/A	#N/A	#N/A	#N/A	#N/A	#N/A	#N/A	#N/A	#N/A	#N/A	#N/A	#N/A							OR10Z1			KDM7A
sp|Q9H2H9|S38A1_HUMAN	SLC38A1	S38A1_HUMAN Sodium-coupled neutral amino acid transporter 1	9	3936.43	4496.88	4216.65	3419.11	3480.06	3449.59	0.818086	-0.289676	4017.4	3424.92	3721.16	0.882491	-0.180347	3935.17	4021.03	3978.1	0.943426	-0.0840194	4193.23	7078.52	5635.88	1.33657	0.418541	#N/A	#N/A	#N/A	#N/A	#N/A	SLC38A1	#N/A	#N/A	#N/A	#N/A	#N/A	#N/A	#N/A							OR11A1			KDM8
sp|P55209|NP1L1_HUMAN	NAP1L1	NP1L1_HUMAN Nucleosome assembly protein 1-like 1	15	2383.05	2314.4	2348.73	1882.1	1961.08	1921.59	0.818142	-0.289577	2248.4	2273.61	2261.01	0.962652	-0.0549136	2097.13	2095.52	2096.32	0.892537	-0.164015	1943.91	2041.6	1992.76	0.848441	-0.237113	#N/A	#N/A	#N/A	#N/A	#N/A	#N/A	#N/A	#N/A	#N/A	#N/A	#N/A	#N/A	#N/A							OR11G2			KHDRBS2
sp|Q13093|PAFA_HUMAN	PLA2G7	PAFA_HUMAN Platelet-activating factor acetylhydrolase	1	522.873	690.842	606.858	491.837	501.245	496.541	0.818217	-0.289445	456.331	393.343	424.837	0.700061	-0.514448	460.088	525.372	492.73	0.811937	-0.30056	483.561	727.665	605.613	0.997949	-0.00296161	#N/A	#N/A	#N/A	#N/A	#N/A	#N/A	#N/A	#N/A	#N/A	#N/A	#N/A	#N/A	#N/A							OR11H1			KHDRBS3
sp|P56945-6|BCAR1_HUMAN	BCAR1	BCAR1_HUMAN Isoform 6 of Breast cancer anti-estrogen resistance protein 1	9	772.526	963.725	868.125	651.05	769.789	710.419	0.818337	-0.289232	945.535	753.401	849.468	0.978508	-0.031344	755.119	668.009	711.564	0.819656	-0.28691	562.537	824.151	693.344	0.798668	-0.324332	#N/A	#N/A	#N/A	#N/A	#N/A	#N/A	#N/A	#N/A	#N/A	#N/A	#N/A	#N/A	#N/A							OR11H12			KLF1
sp|Q9NZI8|IF2B1_HUMAN	IGF2BP1	IF2B1_HUMAN Insulin-like growth factor 2 mRNA-binding protein 1	1	267.798	295.013	281.405	228.753	231.82	230.286	0.818344	-0.289221	255.183	294.828	275.005	0.977257	-0.0331901	243.163	247.277	245.22	0.871412	-0.198574	247.651	260.656	254.154	0.903158	-0.14695	#N/A	#N/A	#N/A	#N/A	#N/A	#N/A	#N/A	#N/A	#N/A	#N/A	#N/A	#N/A	#N/A							OR11H2			KLF10
sp|P23246|SFPQ_HUMAN	SFPQ	SFPQ_HUMAN Splicing factor, proline- and glutamine-rich	9	907.933	809.114	858.524	678.486	726.717	702.601	0.818384	-0.289151	752.421	1010.9	881.66	1.02695	0.0383656	736.243	776.824	756.534	0.881203	-0.182454	898.703	783.865	841.284	0.97992	-0.0292647	#N/A	#N/A	#N/A	#N/A	#N/A	#N/A	#N/A	#N/A	#N/A	#N/A	#N/A	#N/A	#N/A							OR11H4			KLF11
tr|M0QZM1|M0QZM1_HUMAN	HNRNPM	M0QZM1_HUMAN Heterogeneous nuclear ribonucleoprotein M (Fragment)	2	211.957	207.653	209.805	167.77	175.734	171.752	0.818627	-0.288722	192.482	227.233	209.858	1.00025	0.000360964	162.732	186.679	174.706	0.832704	-0.264124	147.74	175.086	161.413	0.769348	-0.378292	#N/A	#N/A	#N/A	#N/A	#N/A	#N/A	#N/A	#N/A	HNRNPM	#N/A	#N/A	#N/A	#N/A							OR11H6			KLF12
sp|Q9UKD2|MRT4_HUMAN	MRTO4	MRT4_HUMAN mRNA turnover protein 4 homolog	1	35.5022	32.9338	34.218	32.7961	23.2342	28.0152	0.818726	-0.288548	38.1217	33.1515	35.6366	1.04146	0.0586043	34.5734	32.2657	33.4196	0.976666	-0.0340631	32.8575	27.0669	29.9622	0.875627	-0.191612	#N/A	#N/A	#N/A	#N/A	#N/A	#N/A	#N/A	#N/A	#N/A	#N/A	#N/A	#N/A	#N/A							OR11H7			KLF13
sp|Q13868|EXOS2_HUMAN	EXOSC2	EXOS2_HUMAN Exosome complex component RRP4	1	412.881	410.607	411.744	333.228	341.126	337.177	0.8189	-0.288241	401.492	452.087	426.789	1.03654	0.0517771	374.542	409.685	392.113	0.952324	-0.0704763	326.564	337.756	332.16	0.806715	-0.309869	#N/A	#N/A	#N/A	#N/A	#N/A	#N/A	#N/A	#N/A	#N/A	#N/A	#N/A	#N/A	#N/A							OR11L1			KLF14
sp|O60869|EDF1_HUMAN	EDF1	EDF1_HUMAN Endothelial differentiation-related factor 1	2	437.675	423.97	430.822	370.588	335.86	353.224	0.819883	-0.28651	356.764	444.701	400.733	0.930157	-0.104454	396.202	390.955	393.578	0.913551	-0.130442	337.34	398.009	367.674	0.853425	-0.228664	#N/A	#N/A	#N/A	#N/A	#N/A	#N/A	#N/A	#N/A	#N/A	#N/A	#N/A	#N/A	#N/A							OR12D1			KLF15
sp|Q04637-9|IF4G1_HUMAN	EIF4G1	IF4G1_HUMAN Isoform 9 of Eukaryotic translation initiation factor 4 gamma 1	23	6234.14	6371.37	6302.76	5142.12	5205.63	5173.88	0.820891	-0.284737	5646.53	6029.16	5837.84	0.926237	-0.110547	5648.07	5543.47	5595.77	0.887829	-0.171646	5184.73	6186.61	5685.67	0.902093	-0.148652	#N/A	#N/A	#N/A	#N/A	#N/A	#N/A	#N/A	#N/A	#N/A	#N/A	#N/A	#N/A	#N/A							OR12D2			KLF16
sp|Q9UMS4|PRP19_HUMAN	PRPF19	PRP19_HUMAN Pre-mRNA-processing factor 19	8	1767.09	1839.62	1803.36	1498.69	1462.08	1480.38	0.820906	-0.284711	1575.24	1751.68	1663.46	0.922425	-0.116496	1614.81	1525.98	1570.39	0.870819	-0.199556	1386.29	1686.84	1536.57	0.852059	-0.230975	#N/A	#N/A	#N/A	#N/A	#N/A	#N/A	#N/A	#N/A	#N/A	#N/A	#N/A	#N/A	#N/A							OR12D3			KLF17
sp|P62312|LSM6_HUMAN	LSM6	LSM6_HUMAN U6 snRNA-associated Sm-like protein LSm6	2	982.901	1006.84	994.87	786.137	847.668	816.902	0.821114	-0.284345	883.956	975.394	929.675	0.934468	-0.0977823	877.333	968.949	923.141	0.927901	-0.107958	812.334	724.299	768.316	0.772278	-0.372808	#N/A	#N/A	#N/A	#N/A	#N/A	#N/A	#N/A	#N/A	#N/A	#N/A	#N/A	#N/A	#N/A							OR13A1			KLF18
sp|O75369-8|FLNB_HUMAN	FLNB	FLNB_HUMAN Isoform 8 of Filamin-B	121	29655.8	27670.9	28663.3	23872.6	23206	23539.3	0.821233	-0.284136	24347.8	27209.4	25778.6	0.899358	-0.153033	27906.9	25363.5	26635.2	0.929242	-0.105873	22881.4	28031	25456.2	0.88811	-0.17119	#N/A	#N/A	#N/A	#N/A	#N/A	#N/A	#N/A	#N/A	#N/A	#N/A	#N/A	#N/A	#N/A							OR13C2			KLF2
sp|P52701|MSH6_HUMAN	MSH6	MSH6_HUMAN DNA mismatch repair protein Msh6	10	1157.13	1182.73	1169.93	950.845	971.35	961.098	0.8215	-0.283668	1058.22	1106.38	1082.3	0.925098	-0.112322	1100.62	991.343	1045.98	0.894055	-0.161565	884.815	1080.49	982.653	0.839924	-0.251669	#N/A	#N/A	#N/A	#N/A	#N/A	#N/A	#N/A	#N/A	MSH6	#N/A	#N/A	#N/A	#N/A							OR13C3			KLF3
sp|P43246|MSH2_HUMAN	MSH2	MSH2_HUMAN DNA mismatch repair protein Msh2	13	1234.38	1251.08	1242.73	995.425	1046.82	1021.12	0.821677	-0.283357	1216.44	1237.53	1226.99	0.98733	-0.0183953	1121.44	1110.21	1115.83	0.897882	-0.155402	958.392	1030.41	994.401	0.800175	-0.321613	#N/A	#N/A	#N/A	#N/A	#N/A	#N/A	#N/A	#N/A	MSH2	#N/A	#N/A	#N/A	#N/A							OR13C4			KLF4
sp|O75937|DNJC8_HUMAN	DNAJC8	DNJC8_HUMAN DnaJ homolog subfamily C member 8	6	1528.88	1362.37	1445.62	1095.42	1281.52	1188.47	0.822115	-0.282588	1327.69	1428.68	1378.18	0.953349	-0.0689238	1216.25	1247.35	1231.8	0.852088	-0.230925	1241.52	1031.98	1136.75	0.786338	-0.346778	#N/A	#N/A	#N/A	#N/A	#N/A	#N/A	#N/A	#N/A	DNAJC8	#N/A	#N/A	#N/A	#N/A							OR13C5			KLF5
sp|Q9NRR5|UBQL4_HUMAN	UBQLN4	UBQL4_HUMAN Ubiquilin-4	4	338.849	374.189	356.519	303.07	283.319	293.195	0.822381	-0.282121	327.539	304.656	316.097	0.886622	-0.173609	345.831	325.013	335.422	0.940825	-0.0880016	301.965	344.229	323.097	0.906255	-0.142012	#N/A	#N/A	#N/A	#N/A	#N/A	#N/A	#N/A	#N/A	#N/A	#N/A	#N/A	#N/A	#N/A							OR13C6P			KLF6
sp|O00411|RPOM_HUMAN	POLRMT	RPOM_HUMAN DNA-directed RNA polymerase, mitochondrial	2	24.7742	38.5405	31.6574	24.1625	27.9173	26.0399	0.822555	-0.281817	26.839	26.1351	26.487	0.836679	-0.257253	24.8198	27.0563	25.9381	0.819337	-0.28747	29.1213	57.2897	43.2055	1.36479	0.448674	#N/A	#N/A	#N/A	#N/A	POLRMT	#N/A	#N/A	#N/A	#N/A	#N/A	#N/A	#N/A	#N/A							OR13C7			KLF7
sp|P53999|TCP4_HUMAN	SUB1	TCP4_HUMAN Activated RNA polymerase II transcriptional coactivator p15	8	428.672	384.385	406.529	325.976	342.814	334.395	0.822562	-0.281803	361.431	454.103	407.767	1.00305	0.00438853	370.309	363.726	367.018	0.902809	-0.147508	349.291	365.03	357.16	0.878562	-0.186784	#N/A	#N/A	#N/A	#N/A	#N/A	#N/A	#N/A	#N/A	SUB1	#N/A	#N/A	#N/A	#N/A							OR13C8			KLF8
sp|Q01658|NC2B_HUMAN	DR1	NC2B_HUMAN Protein Dr1	2	259.756	262.247	261.001	205.148	224.26	214.704	0.822616	-0.281709	285.094	250.331	267.712	1.02571	0.0366264	250.133	237.834	243.983	0.934797	-0.0972745	224.821	202.096	213.459	0.817844	-0.290102	#N/A	#N/A	#N/A	#N/A	#N/A	#N/A	#N/A	#N/A	DR1	#N/A	#N/A	#N/A	#N/A							OR13C9			KLF9
sp|P13639|EF2_HUMAN	EEF2	EF2_HUMAN Elongation factor 2	59	19923.7	18809.6	19366.7	15626.9	16241.4	15934.1	0.822762	-0.281452	19248.9	18778.4	19013.7	0.981773	-0.0265389	17946.8	17599.5	17773.2	0.917719	-0.123875	15184.7	16417.4	15801.1	0.81589	-0.293554	#N/A	#N/A	#N/A	#N/A	#N/A	#N/A	#N/A	#N/A	#N/A	#N/A	#N/A	#N/A	#N/A							OR13D1			KLHDC2
sp|O94888|UBXN7_HUMAN	UBXN7	UBXN7_HUMAN UBX domain-containing protein 7	3	467.08	485.074	476.077	396.87	386.587	391.728	0.822826	-0.281341	434.472	455.245	444.858	0.934426	-0.0978484	440.772	444.362	442.567	0.929612	-0.105299	338.327	428.174	383.25	0.805018	-0.312907	#N/A	#N/A	#N/A	#N/A	#N/A	#N/A	#N/A	#N/A	UBXN7	#N/A	#N/A	#N/A	#N/A							OR13F1			KLHL15
sp|Q9Y3I0|RTCB_HUMAN	RTCB	RTCB_HUMAN tRNA-splicing ligase RtcB homolog	9	2455.09	2459	2457.05	2002.05	2041.4	2021.72	0.822828	-0.281338	2089.62	2340.9	2215.26	0.901595	-0.149448	2045.21	1975.74	2010.47	0.818249	-0.289388	1866.26	1886.54	1876.4	0.763682	-0.388957	#N/A	#N/A	#N/A	#N/A	#N/A	#N/A	#N/A	#N/A	#N/A	#N/A	#N/A	#N/A	#N/A							OR13G1			KLLN
sp|Q9Y4X5|ARI1_HUMAN	ARIH1	ARI1_HUMAN E3 ubiquitin-protein ligase ARIH1	1	489.985	503.819	496.902	412.96	404.77	408.865	0.822828	-0.281337	487.952	506.366	497.159	1.00052	0.000745976	463.848	443.38	453.614	0.912884	-0.131496	354.602	498.191	426.396	0.85811	-0.220766	#N/A	#N/A	#N/A	#N/A	#N/A	#N/A	#N/A	#N/A	#N/A	#N/A	#N/A	#N/A	#N/A							OR13H1			KMT2A
sp|P13010|XRCC5_HUMAN	XRCC5	XRCC5_HUMAN X-ray repair cross-complementing protein 5	22	5618.43	6459.44	6038.93	5255.03	4686.28	4970.65	0.823101	-0.280858	4976.2	5867.51	5421.85	0.897816	-0.155508	5506.92	4757.88	5132.4	0.849885	-0.234661	4327.62	5342.58	4835.1	0.800654	-0.320748	#N/A	#N/A	#N/A	#N/A	#N/A	#N/A	#N/A	#N/A	XRCC5	#N/A	#N/A	#N/A	#N/A							OR13J1			KMT2B
sp|Q9Y5K5|UCHL5_HUMAN	UCHL5	UCHL5_HUMAN Ubiquitin carboxyl-terminal hydrolase isozyme L5	5	823.902	815.661	819.782	656.93	693.164	675.047	0.823447	-0.280251	821.436	743.6	782.518	0.954545	-0.0671155	732.442	765.972	749.207	0.913911	-0.129875	692.732	762.928	727.83	0.887834	-0.171638	#N/A	#N/A	#N/A	#N/A	#N/A	#N/A	#N/A	#N/A	#N/A	#N/A	#N/A	#N/A	#N/A							OR14A16			KMT2C
sp|O00193|SMAP_HUMAN	SMAP	SMAP_HUMAN Small acidic protein	3	568.104	520.043	544.073	455.545	440.505	448.025	0.823464	-0.280222	417.058	518.301	467.68	0.859589	-0.218281	503.914	435.236	469.575	0.863073	-0.212446	363.94	404.645	384.293	0.706325	-0.501597	#N/A	#N/A	#N/A	#N/A	#N/A	#N/A	#N/A	#N/A	#N/A	#N/A	#N/A	#N/A	#N/A							OR14A2			KMT2D
sp|Q53G44|IF44L_HUMAN	IFI44L	IF44L_HUMAN Interferon-induced protein 44-like	1	88.3431	80.3967	84.3699	71.0305	67.9585	69.4945	0.823688	-0.27983	65.3196	58.5291	61.9243	0.733963	-0.446222	88.23	63.1635	75.6968	0.897201	-0.156497	50.2027	63.2053	56.704	0.672088	-0.573278	#N/A	#N/A	#N/A	#N/A	#N/A	#N/A	#N/A	#N/A	#N/A	IFI44L	#N/A	#N/A	#N/A							OR14C36			KMT5A
sp|Q9Y2X9|ZN281_HUMAN	ZNF281	ZN281_HUMAN Zinc finger protein 281	2	284.556	282.958	283.757	232.754	234.746	233.75	0.823768	-0.27969	254.235	290.903	272.569	0.960572	-0.0580345	246.015	219.018	232.517	0.819421	-0.287323	203.468	262.544	233.006	0.821146	-0.284289	#N/A	#N/A	#N/A	#N/A	#N/A	#N/A	#N/A	#N/A	ZNF281	#N/A	#N/A	#N/A	#N/A							OR14I1			KMT5B
sp|Q9Y6Y8|S23IP_HUMAN	SEC23IP	S23IP_HUMAN SEC23-interacting protein	10	2041.58	2221.37	2131.47	1750.23	1762.04	1756.13	0.823906	-0.279448	1996.44	2057.93	2027.18	0.951071	-0.0723744	1863.56	1737.37	1800.46	0.844704	-0.243483	1541.8	2337.34	1939.57	0.909966	-0.136115	SEC23IP	#N/A	#N/A	#N/A	#N/A	#N/A	#N/A	#N/A	#N/A	#N/A	#N/A	#N/A	#N/A							OR14J1			KMT5C
sp|Q96MW1|CCD43_HUMAN	CCDC43	CCD43_HUMAN Coiled-coil domain-containing protein 43	1	117.689	104.159	110.924	89.872	92.9263	91.3991	0.82398	-0.279319	116.851	95.5348	106.193	0.957348	-0.0628842	93.5892	79.4649	86.5271	0.780057	-0.358348	77.4416	83.7856	80.6136	0.726746	-0.460476	#N/A	#N/A	#N/A	#N/A	#N/A	#N/A	#N/A	#N/A	#N/A	#N/A	#N/A	#N/A	#N/A							OR14K1			KNL1
sp|P11717|MPRI_HUMAN	IGF2R	MPRI_HUMAN Cation-independent mannose-6-phosphate receptor	55	16190.5	20356.3	18273.4	15426.2	14690.2	15058.2	0.82405	-0.279196	16504.7	15228.7	15866.7	0.868295	-0.203743	17205.9	17069.1	17137.5	0.937839	-0.0925884	15692.7	29202.6	22447.7	1.22843	0.296819	#N/A	#N/A	#N/A	#N/A	#N/A	#N/A	#N/A	#N/A	#N/A	#N/A	#N/A	#N/A	#N/A							OR14L1P			KNOP1
sp|P62873|GBB1_HUMAN	GNB1	GBB1_HUMAN Guanine nucleotide-binding protein G(I)/G(S)/G(T) subunit beta-1	7	2345.14	2783.72	2564.43	2141.02	2085.9	2113.46	0.824144	-0.279031	2221.27	1923.06	2072.16	0.808041	-0.307499	2240.55	2279.58	2260.07	0.881313	-0.182274	1895.48	3460.52	2678	1.04429	0.0625178	#N/A	#N/A	#N/A	#N/A	#N/A	#N/A	#N/A	#N/A	#N/A	#N/A	#N/A	#N/A	#N/A							OR1A1			KPNA7
sp|Q5T3I0-3|GPTC4_HUMAN	GPATCH4	GPTC4_HUMAN Isoform 3 of G patch domain-containing protein 4	2	338.09	307.955	323.022	239.239	293.228	266.233	0.824195	-0.278943	308.24	339.484	323.862	1.0026	0.00374454	276.68	246.915	261.798	0.810462	-0.303183	269.707	242.66	256.183	0.793083	-0.334457	#N/A	#N/A	#N/A	#N/A	#N/A	#N/A	#N/A	#N/A	#N/A	#N/A	#N/A	#N/A	#N/A							OR1A2			L3MBTL1
sp|Q6NT16|S18B1_HUMAN	SLC18B1	S18B1_HUMAN MFS-type transporter SLC18B1	3	397.686	373.805	385.745	326.124	309.879	318.002	0.824382	-0.278616	391.886	298.762	345.324	0.895212	-0.159699	312.407	365.085	338.746	0.878159	-0.187445	314.23	291.65	302.94	0.785336	-0.348617	#N/A	#N/A	#N/A	#N/A	#N/A	#N/A	#N/A	#N/A	#N/A	#N/A	#N/A	#N/A	#N/A							OR1B1			L3MBTL2
sp|O75367|H2AY_HUMAN	H2AFY	H2AY_HUMAN Core histone macro-H2A.1	2	191.563	167.733	179.648	129.309	167.107	148.208	0.824991	-0.27755	188.223	219.861	204.042	1.13579	0.183693	166.193	210.997	188.595	1.0498	0.0701186	216.568	180.921	198.745	1.1063	0.145742	#N/A	#N/A	#N/A	#N/A	#N/A	#N/A	#N/A	#N/A	H2AFY	#N/A	#N/A	#N/A	#N/A							OR1C1			L3MBTL3
sp|Q16881|TRXR1_HUMAN	TXNRD1	TRXR1_HUMAN Thioredoxin reductase 1, cytoplasmic	20	2630.7	2772.59	2701.64	2217.96	2240.47	2229.22	0.825132	-0.277302	2455.34	2306.57	2380.95	0.881298	-0.182298	2597.5	2795.41	2696.45	0.998079	-0.00277416	2525.16	2781.26	2653.21	0.982072	-0.0260992	#N/A	#N/A	#N/A	#N/A	#N/A	#N/A	#N/A	#N/A	#N/A	#N/A	#N/A	#N/A	#N/A							OR1D2			L3MBTL4
sp|Q9UEW8|STK39_HUMAN	STK39	STK39_HUMAN STE20/SPS1-related proline-alanine-rich protein kinase	1	135.143	169.615	152.379	135.075	116.424	125.749	0.825242	-0.277111	131.647	152.724	142.185	0.933104	-0.0998897	148.595	141.252	144.923	0.951073	-0.0723725	113.849	169.415	141.632	0.929472	-0.105517	#N/A	#N/A	#N/A	#N/A	#N/A	#N/A	#N/A	#N/A	#N/A	#N/A	#N/A	#N/A	#N/A							OR1D4			LARP7
sp|Q9Y2H0|DLGP4_HUMAN	DLGAP4	DLGP4_HUMAN Disks large-associated protein 4	5	826.87	859.974	843.422	702.421	689.744	696.082	0.825307	-0.276996	761.8	659.372	710.586	0.842504	-0.247245	726.76	782.463	754.611	0.894702	-0.160521	817.909	1123.83	970.87	1.15111	0.203023	#N/A	#N/A	#N/A	#N/A	#N/A	#N/A	#N/A	#N/A	#N/A	#N/A	#N/A	#N/A	#N/A							OR1D5			LBX1
sp|Q13257|MD2L1_HUMAN	MAD2L1	MD2L1_HUMAN Mitotic spindle assembly checkpoint protein MAD2A	3	301.011	285.966	293.489	249.097	235.344	242.221	0.825315	-0.276983	277.244	227.928	252.586	0.860633	-0.216529	235.546	221.3	228.423	0.778303	-0.361596	172.964	197.625	185.294	0.631352	-0.663484	#N/A	#N/A	#N/A	#N/A	#N/A	#N/A	#N/A	#N/A	#N/A	#N/A	#N/A	#N/A	#N/A							OR1E1			LBX2
sp|P67809|YBOX1_HUMAN	YBX1	YBOX1_HUMAN Nuclease-sensitive element-binding protein 1	9	2893.31	2766.75	2830.03	2319.78	2353.97	2336.88	0.825742	-0.276237	2418.91	2603.26	2511.09	0.8873	-0.172506	2458.02	2392.5	2425.26	0.856973	-0.222678	2288.4	2943.58	2615.99	0.924368	-0.11346	#N/A	#N/A	#N/A	#N/A	#N/A	#N/A	#N/A	#N/A	#N/A	#N/A	#N/A	#N/A	#N/A							OR1E2			LCOR
sp|O00743-3|PPP6_HUMAN	PPP6C	PPP6_HUMAN Isoform 3 of Serine/threonine-protein phosphatase 6 catalytic subunit	3	712.378	697.205	704.792	586.031	578.223	582.127	0.825956	-0.275863	720.884	652.689	686.786	0.974453	-0.0373348	672.192	705.83	689.011	0.97761	-0.0326695	592.956	665.487	629.221	0.892777	-0.163629	#N/A	#N/A	#N/A	#N/A	#N/A	#N/A	#N/A	#N/A	#N/A	#N/A	#N/A	#N/A	#N/A							OR1E3			LCORL
sp|P28370|SMCA1_HUMAN	SMARCA1	SMCA1_HUMAN Probable global transcription activator SNF2L1	1	145.691	140.153	142.922	117.294	118.914	118.104	0.826353	-0.27517	125.286	144.316	134.801	0.943179	-0.0843968	127.718	122.357	125.037	0.874865	-0.192867	118.402	130.386	124.394	0.870363	-0.200311	#N/A	#N/A	#N/A	#N/A	#N/A	#N/A	#N/A	#N/A	SMARCA1	#N/A	#N/A	#N/A	#N/A							OR1F1			LDB1
sp|O15379-2|HDAC3_HUMAN	HDAC3	HDAC3_HUMAN Isoform 2 of Histone deacetylase 3	1	90.0179	82.6268	86.3224	64.8316	77.8845	71.358	0.826646	-0.274658	80.2299	74.6101	77.42	0.896871	-0.157028	78.7955	68.249	73.5222	0.851717	-0.231553	72.4002	66.8722	69.6362	0.8067	-0.309897	#N/A	#N/A	#N/A	#N/A	#N/A	#N/A	#N/A	#N/A	#N/A	#N/A	#N/A	#N/A	#N/A							OR1F12			LDB2
sp|Q53H96|P5CR3_HUMAN	PYCRL	P5CR3_HUMAN Pyrroline-5-carboxylate reductase 3	1	125.226	115.031	120.129	104.301	94.3963	99.3486	0.82702	-0.274006	112.485	111.762	112.124	0.933363	-0.0994898	93.2075	119.086	106.147	0.88361	-0.178518	94.7127	84.3003	89.5065	0.74509	-0.424514	#N/A	#N/A	#N/A	#N/A	#N/A	#N/A	#N/A	#N/A	#N/A	#N/A	#N/A	#N/A	#N/A							OR1F2P			LDOC1
sp|Q96P16|RPR1A_HUMAN	RPRD1A	RPR1A_HUMAN Regulation of nuclear pre-mRNA domain-containing protein 1A	7	1118.5	1028.3	1073.4	854.689	922.434	888.562	0.827801	-0.272644	1107.22	1054.07	1080.64	1.00675	0.00970487	1011.2	1005.72	1008.46	0.939501	-0.0900339	908.118	881.514	894.816	0.833628	-0.262525	#N/A	#N/A	#N/A	#N/A	#N/A	#N/A	#N/A	#N/A	#N/A	#N/A	#N/A	#N/A	#N/A							OR1G1			LEF1
sp|Q96LD4|TRI47_HUMAN	TRIM47	TRI47_HUMAN Tripartite motif-containing protein 47	3	114.49	119.543	117.017	98.7843	94.9542	96.8692	0.827826	-0.272601	121.772	90.0067	105.889	0.90491	-0.144154	115.556	97.5482	106.552	0.910573	-0.135153	84.4744	112.456	98.4652	0.841464	-0.249026	#N/A	#N/A	#N/A	#N/A	#N/A	#N/A	#N/A	#N/A	#N/A	#N/A	#N/A	#N/A	#N/A							OR1I1			LEMD2
sp|Q96M27|PRRC1_HUMAN	PRRC1	PRRC1_HUMAN Protein PRRC1	12	3116.05	3153.83	3134.94	2732.49	2458.3	2595.39	0.827893	-0.272484	2809.02	2890.51	2849.77	0.909033	-0.137595	2760.16	2660.15	2710.15	0.8645	-0.210062	2339.02	2799.9	2569.46	0.81962	-0.286973	#N/A	#N/A	PRRC1	#N/A	#N/A	#N/A	#N/A	#N/A	#N/A	#N/A	#N/A	#N/A	#N/A							OR1J1			LEMD3
sp|O60936|NOL3_HUMAN	NOL3	NOL3_HUMAN Nucleolar protein 3	1	33.2379	31.9229	32.5804	28.5169	25.4548	26.9858	0.828285	-0.271801	37.9707	62.8974	50.434	1.54799	0.630394	39.7908	37.4753	38.633	1.18578	0.245831	46.6973	24.6737	35.6855	1.09531	0.131334	#N/A	#N/A	#N/A	#N/A	#N/A	#N/A	#N/A	#N/A	#N/A	#N/A	#N/A	#N/A	#N/A							OR1J2			LEO1
sp|B5ME19|EIFCL_HUMAN	EIF3CL	EIFCL_HUMAN Eukaryotic translation initiation factor 3 subunit C-like protein	11	2483.46	2730.05	2606.76	2138.25	2180.05	2159.15	0.82829	-0.271792	2136.56	2533.42	2334.99	0.895746	-0.158839	2262.14	2223.19	2242.66	0.860328	-0.217041	2108.92	2584.93	2346.93	0.900324	-0.151483	#N/A	#N/A	#N/A	#N/A	#N/A	#N/A	#N/A	#N/A	#N/A	EIF3CL	#N/A	#N/A	#N/A							OR1J4			LEUTX
sp|P08174-7|DAF_HUMAN	CD55	DAF_HUMAN Isoform 7 of Complement decay-accelerating factor	3	736.323	709.563	722.943	647.445	550.377	598.911	0.828435	-0.27154	739.464	610.26	674.862	0.933493	-0.0992894	788.715	769.047	778.881	1.07738	0.107521	600.437	1584.89	1092.66	1.51141	0.595895	#N/A	#N/A	#N/A	#N/A	#N/A	#N/A	#N/A	#N/A	#N/A	#N/A	#N/A	#N/A	#N/A							OR1K1			LGALS12
sp|Q8NBJ9-2|SIDT2_HUMAN	SIDT2	SIDT2_HUMAN Isoform 2 of SID1 transmembrane family member 2	6	1399.91	1431.02	1415.47	1171.94	1173.69	1172.82	0.828572	-0.271301	1161.41	1082.87	1122.14	0.792771	-0.335023	1113.52	1227.42	1170.47	0.826916	-0.274188	1011.43	1417.15	1214.29	0.857874	-0.221163	#N/A	#N/A	#N/A	#N/A	#N/A	#N/A	#N/A	#N/A	#N/A	#N/A	#N/A	#N/A	#N/A							OR1L1			LGALS14
sp|Q14498|RBM39_HUMAN	RBM39	RBM39_HUMAN RNA-binding protein 39	27	4646.67	4178.59	4412.63	3589.39	3724.82	3657.11	0.828781	-0.270937	3935.87	4141.89	4038.88	0.9153	-0.127683	3866.5	3696.39	3781.44	0.856959	-0.222701	3016.77	3404.8	3210.78	0.727635	-0.458713	#N/A	#N/A	#N/A	#N/A	#N/A	#N/A	#N/A	#N/A	RBM39	#N/A	#N/A	#N/A	#N/A							OR1L3			LHX1
sp|P19021-5|AMD_HUMAN	PAM	AMD_HUMAN Isoform 5 of Peptidyl-glycine alpha-amidating monooxygenase	1	22.7339	16.8235	19.7787	13.0832	19.7114	16.3973	0.829038	-0.270489	16.8692	16.8675	16.8683	0.852854	-0.229629	16.0871	22.1443	19.1157	0.966479	-0.0491896	25.2906	26.6068	25.9487	1.31195	0.391715	#N/A	#N/A	#N/A	#N/A	#N/A	#N/A	#N/A	#N/A	#N/A	#N/A	#N/A	#N/A	#N/A							OR1L4			LHX2
sp|Q16543|CDC37_HUMAN	CDC37	CDC37_HUMAN Hsp90 co-chaperone Cdc37	2	976.665	900.108	938.386	770.996	785.263	778.13	0.829221	-0.270172	857.442	957.095	907.269	0.966839	-0.0486527	856.308	781.218	818.763	0.872522	-0.196736	735.064	755.363	745.214	0.794143	-0.332528	#N/A	#N/A	#N/A	#N/A	#N/A	#N/A	#N/A	#N/A	#N/A	CDC37	#N/A	#N/A	#N/A							OR1L6			LHX3
sp|P55010|IF5_HUMAN	EIF5	IF5_HUMAN Eukaryotic translation initiation factor 5	1	57.5564	55.0784	56.3174	43.8366	49.5671	46.7019	0.829261	-0.270101	63.741	62.4499	63.0954	1.12035	0.163955	42.0146	50.8078	46.4112	0.824101	-0.279108	43.2896	32.8533	38.0714	0.676016	-0.564871	#N/A	#N/A	#N/A	#N/A	#N/A	#N/A	#N/A	#N/A	#N/A	#N/A	#N/A	#N/A	#N/A							OR1L8			LHX4
sp|P42285|SK2L2_HUMAN	SKIV2L2	SK2L2_HUMAN Superkiller viralicidic activity 2-like 2	1	25.8973	26.6216	26.2595	23.5677	19.991	21.7794	0.829391	-0.269876	28.4395	25.9192	27.1793	1.03503	0.0496743	27.0554	21.941	24.4982	0.932929	-0.100161	23.1047	34.0395	28.5721	1.08807	0.12177	#N/A	#N/A	#N/A	#N/A	#N/A	#N/A	#N/A	#N/A	#N/A	#N/A	#N/A	#N/A	#N/A							OR1M1			LHX5
sp|Q9ULI3|HEG1_HUMAN	HEG1	HEG1_HUMAN Protein HEG homolog 1	3	607.369	654.602	630.986	560.76	485.913	523.337	0.829395	-0.269868	589.21	548.103	568.657	0.90122	-0.150049	613.976	588.686	601.331	0.953003	-0.0694475	559.612	589.813	574.712	0.910817	-0.134766	#N/A	#N/A	#N/A	#N/A	#N/A	#N/A	#N/A	#N/A	#N/A	#N/A	#N/A	#N/A	#N/A							OR1N1			LHX6
sp|Q04727-3|TLE4_HUMAN	TLE4	TLE4_HUMAN Isoform 3 of Transducin-like enhancer protein 4	2	234.131	281.37	257.75	210.405	217.243	213.824	0.829577	-0.269551	237.201	241.421	239.311	0.92846	-0.107089	244.067	238.72	241.394	0.936539	-0.0945884	207.245	247.119	227.182	0.881403	-0.182127	#N/A	#N/A	#N/A	#N/A	#N/A	#N/A	#N/A	#N/A	TLE4	#N/A	#N/A	#N/A	#N/A							OR1N2			LHX8
sp|Q9BVP2|GNL3_HUMAN	GNL3	GNL3_HUMAN Guanine nucleotide-binding protein-like 3	6	1017.68	1112.86	1065.27	863.154	905.091	884.122	0.829952	-0.268901	945.345	1015.41	980.378	0.920309	-0.11981	860.582	885.68	873.131	0.819634	-0.286949	785.838	921.45	853.644	0.801341	-0.319513	#N/A	#N/A	#N/A	#N/A	#N/A	#N/A	#N/A	#N/A	GNL3	#N/A	#N/A	#N/A	#N/A							OR1P1			LHX9
sp|Q9P258|RCC2_HUMAN	RCC2	RCC2_HUMAN Protein RCC2	2	956.419	868.788	912.603	782.152	732.801	757.476	0.830017	-0.268787	845.287	974.195	909.741	0.996863	-0.00453231	851.843	802.994	827.418	0.906657	-0.141371	680.007	879.437	779.722	0.854393	-0.227028	#N/A	#N/A	#N/A	#N/A	#N/A	#N/A	#N/A	#N/A	#N/A	#N/A	#N/A	#N/A	#N/A							OR1Q1			LIG1
sp|P62081|RS7_HUMAN	RPS7	RS7_HUMAN 40S ribosomal protein S7	10	4041.34	4111.02	4076.18	3069.69	3700.64	3385.16	0.830475	-0.267992	4203.78	3741.62	3972.7	0.974613	-0.0370979	3446.65	3550.35	3498.5	0.858279	-0.220481	3088.81	3049.36	3069.09	0.752932	-0.409409	#N/A	#N/A	#N/A	#N/A	#N/A	#N/A	#N/A	#N/A	#N/A	#N/A	#N/A	#N/A	#N/A							OR1S1			LIG4
sp|Q14839-2|CHD4_HUMAN	CHD4	CHD4_HUMAN Isoform 2 of Chromodomain-helicase-DNA-binding protein 4	6	929.921	995.326	962.624	749.805	849.398	799.601	0.830648	-0.26769	806.09	1003.41	904.75	0.939879	-0.0894524	780.451	806.486	793.468	0.824277	-0.278799	797.859	842.229	820.044	0.851884	-0.23127	#N/A	#N/A	#N/A	#N/A	#N/A	#N/A	#N/A	#N/A	#N/A	#N/A	#N/A	#N/A	#N/A							OR1S2			LIN54
sp|P04792|HSPB1_HUMAN	HSPB1	HSPB1_HUMAN Heat shock protein beta-1	22	6653.48	5536.56	6095.02	5053.74	5072.91	5063.32	0.830731	-0.267546	6004.18	8092.97	7048.58	1.15645	0.209701	5783.02	5268.59	5525.81	0.90661	-0.141446	6382.45	4163.01	5272.73	0.865088	-0.209081	#N/A	#N/A	#N/A	#N/A	#N/A	#N/A	#N/A	#N/A	#N/A	#N/A	#N/A	#N/A	#N/A							OR2A1			LIN9
sp|O15554|KCNN4_HUMAN	KCNN4	KCNN4_HUMAN Intermediate conductance calcium-activated potassium channel protein 4	5	1457.95	1465.65	1461.8	1238.03	1190.72	1214.38	0.830739	-0.267532	1248.25	1137.99	1193.12	0.816199	-0.293007	1234.57	1344.66	1289.62	0.88221	-0.180806	1412.77	1445.34	1429.05	0.9776	-0.0326845	#N/A	#N/A	#N/A	#N/A	#N/A	KCNN4	#N/A	#N/A	#N/A	#N/A	#N/A	#N/A	#N/A							OR2A12			LLPH
sp|Q16270|IBP7_HUMAN	IGFBP7	IBP7_HUMAN Insulin-like growth factor-binding protein 7	4	2132.35	1857.35	1994.85	1612.33	1702.1	1657.21	0.830747	-0.267519	1893.58	1841.71	1867.64	0.936233	-0.09506	2157.52	2094.65	2126.09	1.06579	0.091919	1890.95	2766.44	2328.7	1.16735	0.223241	#N/A	#N/A	#N/A	#N/A	#N/A	#N/A	#N/A	#N/A	#N/A	#N/A	#N/A	#N/A	#N/A							OR2A14			LMNA
sp|O60828|PQBP1_HUMAN	PQBP1	PQBP1_HUMAN Polyglutamine-binding protein 1	4	605.195	508.896	557.046	431.846	493.821	462.834	0.830872	-0.267302	478.335	516.01	497.173	0.892517	-0.164049	543.221	523.628	533.425	0.957596	-0.0625111	494.252	469.545	481.899	0.865097	-0.209066	#N/A	#N/A	#N/A	#N/A	#N/A	#N/A	#N/A	#N/A	#N/A	#N/A	#N/A	#N/A	#N/A							OR2A2			LMNB1
sp|Q9UI42|CBPA4_HUMAN	CPA4	CBPA4_HUMAN Carboxypeptidase A4	3	278.154	302.237	290.196	247.541	234.88	241.21	0.8312	-0.266732	270.427	542.066	406.247	1.39991	0.48533	299.909	287.57	293.74	1.01221	0.0175121	369.859	309.818	339.838	1.17107	0.227824	#N/A	#N/A	#N/A	#N/A	#N/A	#N/A	#N/A	#N/A	#N/A	#N/A	#N/A	#N/A	#N/A							OR2A25			LMNB2
sp|Q86UK7|ZN598_HUMAN	ZNF598	ZN598_HUMAN Zinc finger protein 598	4	375.792	353.749	364.77	282.399	324.112	303.255	0.83136	-0.266455	354.236	342.885	348.56	0.955561	-0.06558	335.541	341.689	338.615	0.928296	-0.107343	284.213	308.575	296.394	0.812549	-0.299473	#N/A	#N/A	#N/A	#N/A	#N/A	#N/A	#N/A	#N/A	#N/A	#N/A	#N/A	#N/A	#N/A							OR2A4			LMO1
sp|Q12906-7|ILF3_HUMAN	ILF3	ILF3_HUMAN Isoform 7 of Interleukin enhancer-binding factor 3	7	900.259	983.983	942.121	783.855	783.342	783.599	0.831739	-0.265798	793.77	992.301	893.035	0.947899	-0.0771948	816.008	777.091	796.55	0.845485	-0.242148	746.088	848.129	797.109	0.846079	-0.241136	#N/A	#N/A	#N/A	#N/A	#N/A	#N/A	#N/A	#N/A	#N/A	#N/A	#N/A	#N/A	#N/A							OR2A5			LMO2
sp|P31153|METK2_HUMAN	MAT2A	METK2_HUMAN S-adenosylmethionine synthase isoform type-2	15	2090.87	2200.31	2145.59	1829.41	1741.5	1785.45	0.832151	-0.265083	2003.01	2136.96	2069.99	0.964763	-0.0517541	1918.97	1976.16	1947.57	0.907706	-0.139703	1803.7	1878.33	1841.01	0.858046	-0.220873	#N/A	#N/A	#N/A	#N/A	#N/A	#N/A	#N/A	#N/A	#N/A	#N/A	#N/A	#N/A	#N/A							OR2A7			LMX1A
sp|P14543|NID1_HUMAN	NID1	NID1_HUMAN Nidogen-1	1	37.8723	23.9567	30.9145	29.0783	22.3848	25.7315	0.832346	-0.264745	22.6011	27.6954	25.1482	0.813477	-0.297826	31.9887	34.5047	33.2467	1.07544	0.104927	35.4742	54.3295	44.9019	1.45245	0.538491	#N/A	#N/A	#N/A	#N/A	#N/A	#N/A	#N/A	#N/A	#N/A	#N/A	#N/A	#N/A	#N/A							OR2AE1			LMX1B
sp|O75475|PSIP1_HUMAN	PSIP1	PSIP1_HUMAN PC4 and SFRS1-interacting protein	4	1036.38	948.424	992.402	836.13	816.11	826.12	0.832445	-0.264573	764.755	1103.9	934.328	0.941481	-0.0869963	862.599	772.823	817.711	0.823972	-0.279334	750.967	723.9	737.433	0.743079	-0.428412	#N/A	#N/A	#N/A	#N/A	#N/A	#N/A	#N/A	#N/A	PSIP1	#N/A	#N/A	#N/A	#N/A							OR2AG1			LPIN3
sp|P25786-2|PSA1_HUMAN	PSMA1	PSA1_HUMAN Isoform Long of Proteasome subunit alpha type-1	12	3460.47	3072.46	3266.47	2709.93	2729.14	2719.53	0.832562	-0.26437	2945.88	3327.63	3136.76	0.96029	-0.0584573	2855.27	2688.45	2771.86	0.848581	-0.236876	2545.67	2182.15	2363.91	0.723691	-0.466555	#N/A	#N/A	#N/A	#N/A	#N/A	#N/A	#N/A	#N/A	#N/A	#N/A	#N/A	#N/A	#N/A							OR2AG2			LRIF1
sp|Q9BTE3|MCMBP_HUMAN	MCMBP	MCMBP_HUMAN Mini-chromosome maintenance complex-binding protein	1	232.94	250.606	241.773	189.151	213.488	201.32	0.83268	-0.264166	237.164	242.043	239.603	0.991027	-0.0130042	239.774	242.346	241.06	0.997051	-0.00426086	190.381	205.764	198.072	0.81925	-0.287625	#N/A	#N/A	#N/A	#N/A	#N/A	#N/A	#N/A	#N/A	MCMBP	#N/A	#N/A	#N/A	#N/A							OR2AJ1			LRRC10
sp|P18615|NELFE_HUMAN	NELFE	NELFE_HUMAN Negative elongation factor E	4	844.668	589.867	717.267	689.784	505.343	597.563	0.833111	-0.263419	659.126	573.823	616.475	0.859476	-0.21847	730.197	573.262	651.729	0.908628	-0.138238	606.092	506.495	556.293	0.775573	-0.366665	#N/A	#N/A	#N/A	#N/A	#N/A	#N/A	#N/A	#N/A	NELFE	#N/A	#N/A	#N/A	#N/A							OR2AK2			LSM10
sp|P21127|CD11B_HUMAN	CDK11B	CD11B_HUMAN Cyclin-dependent kinase 11B	6	1240.95	1425.62	1333.28	1157.39	1064.81	1111.1	0.833355	-0.262997	1159.88	1324.22	1242.05	0.931571	-0.102262	1108.62	1037.57	1073.09	0.80485	-0.313207	1017.8	1226.21	1122.01	0.841534	-0.248906	#N/A	#N/A	#N/A	#N/A	#N/A	#N/A	#N/A	#N/A	#N/A	#N/A	#N/A	#N/A	#N/A							OR2AP1			LSM11
sp|Q9Y285|SYFA_HUMAN	FARSA	SYFA_HUMAN Phenylalanine--tRNA ligase alpha subunit	8	972.118	943.296	957.707	772.2	824.349	798.274	0.833527	-0.262699	854.205	944.983	899.594	0.939321	-0.0903103	832.309	865.893	849.101	0.886598	-0.173648	792.174	824.71	808.442	0.844143	-0.24444	#N/A	#N/A	#N/A	#N/A	#N/A	#N/A	#N/A	#N/A	#N/A	FARSA	#N/A	#N/A	#N/A							OR2AT4			LSM2
sp|P51511|MMP15_HUMAN	MMP15	MMP15_HUMAN Matrix metalloproteinase-15	5	1326.47	1290.87	1308.67	1075.05	1108.17	1091.61	0.834137	-0.261644	1266.76	1054.58	1160.67	0.886908	-0.173144	1504.41	1693.46	1598.93	1.2218	0.28901	1433.24	1354.21	1393.72	1.06499	0.0908446	#N/A	#N/A	#N/A	#N/A	#N/A	#N/A	#N/A	#N/A	#N/A	#N/A	#N/A	#N/A	#N/A							OR2B11			LSM3
sp|Q92688|AN32B_HUMAN	ANP32B	AN32B_HUMAN Acidic leucine-rich nuclear phosphoprotein 32 family member B	1	221.576	163.437	192.507	164.799	156.382	160.591	0.834208	-0.261521	171.815	247.353	209.584	1.08871	0.122621	185.748	183.931	184.839	0.960173	-0.0586341	139.397	160.961	150.179	0.780124	-0.358224	#N/A	#N/A	#N/A	#N/A	#N/A	#N/A	#N/A	#N/A	#N/A	#N/A	#N/A	#N/A	#N/A							OR2B2			LSM4
sp|Q8NFH5|NUP53_HUMAN	NUP35	NUP53_HUMAN Nucleoporin NUP53	10	1789.68	1713.4	1751.54	1423	1499.88	1461.44	0.834374	-0.261233	1696.17	1659.24	1677.7	0.957846	-0.0621349	1648.19	1610.84	1629.51	0.930333	-0.104181	1360.44	1340.12	1350.28	0.77091	-0.375365	#N/A	#N/A	#N/A	#N/A	#N/A	#N/A	#N/A	#N/A	NUP35	#N/A	#N/A	#N/A	#N/A							OR2B3			LSM5
sp|O15230|LAMA5_HUMAN	LAMA5	LAMA5_HUMAN Laminin subunit alpha-5	12	2154.86	2406.54	2280.7	1863.18	1943.94	1903.56	0.834638	-0.260777	2114.47	1759.18	1936.82	0.849224	-0.235783	2428.92	2650.98	2539.95	1.11367	0.155323	2424.35	3591.03	3007.69	1.31876	0.399179	#N/A	#N/A	#N/A	#N/A	#N/A	#N/A	#N/A	#N/A	#N/A	#N/A	#N/A	#N/A	#N/A							OR2B6			LSM7
sp|Q13228|SBP1_HUMAN	SELENBP1	SBP1_HUMAN Selenium-binding protein 1	9	1384.78	1529.53	1457.15	1256.02	1178.2	1217.11	0.835265	-0.259695	1364.06	1310.11	1337.09	0.9176	-0.124063	1505.56	1509.04	1507.3	1.03441	0.0488122	1392.48	1646.98	1519.73	1.04294	0.0606607	#N/A	#N/A	#N/A	#N/A	#N/A	#N/A	#N/A	#N/A	#N/A	#N/A	#N/A	#N/A	#N/A							OR2B8P			LSM8
sp|Q16181|SEPT7_HUMAN	SEPT7	SEPT7_HUMAN Septin-7	4	613.982	601.906	607.944	504.132	511.588	507.86	0.835373	-0.259508	489.933	525.922	507.928	0.835484	-0.259316	589.427	513.45	551.438	0.907055	-0.140738	506.076	475.431	490.754	0.807235	-0.30894	#N/A	#N/A	#N/A	#N/A	#N/A	#N/A	#N/A	#N/A	#N/A	#N/A	#N/A	#N/A	#N/A							OR2C1			LTO1
sp|Q9H910|HN1L_HUMAN	HN1L	HN1L_HUMAN Hematological and neurological expressed 1-like protein	1	39.6339	28.0944	33.8641	28.3853	28.1951	28.2902	0.835403	-0.259456	25.2732	34.5897	29.9314	0.883868	-0.178097	28.2	28.6015	28.4008	0.838667	-0.25383	21.7543	29.8749	25.8146	0.762299	-0.391572	#N/A	#N/A	#N/A	#N/A	#N/A	#N/A	#N/A	#N/A	#N/A	#N/A	#N/A	#N/A	#N/A							OR2C3			LUC7L2
sp|Q96BP2|CHCH1_HUMAN	CHCHD1	CHCH1_HUMAN Coiled-coil-helix-coiled-coil-helix domain-containing protein 1	1	254.575	274.52	264.548	217.061	224.956	221.008	0.835421	-0.259425	205.692	246.817	226.255	0.855251	-0.22558	272.415	246.988	259.702	0.981682	-0.0266724	296.806	328.444	312.625	1.18173	0.240906	#N/A	#N/A	#N/A	#N/A	#N/A	#N/A	#N/A	#N/A	#N/A	#N/A	#N/A	#N/A	#N/A							OR2D2			LUC7L3
sp|Q8WZA0|LZIC_HUMAN	LZIC	LZIC_HUMAN Protein LZIC	3	357.859	333.782	345.82	277.868	300.094	288.981	0.835639	-0.259049	359.923	354.186	357.054	1.03249	0.0461209	306.564	291.146	298.855	0.864191	-0.210578	271.786	250.757	261.272	0.755512	-0.404474	#N/A	#N/A	#N/A	#N/A	#N/A	#N/A	#N/A	#N/A	#N/A	#N/A	#N/A	#N/A	#N/A							OR2D3			LUZP1
sp|P52732|KIF11_HUMAN	KIF11	KIF11_HUMAN Kinesin-like protein KIF11	2	107.502	92.6749	100.088	86.966	80.3932	83.6796	0.836057	-0.258328	118.438	110.5	114.469	1.14368	0.193681	99.6998	103.061	101.38	1.01291	0.0185033	86.748	117.782	102.265	1.02175	0.031037	#N/A	#N/A	#N/A	#N/A	#N/A	#N/A	#N/A	#N/A	#N/A	#N/A	#N/A	#N/A	#N/A							OR2F1			LYL1
sp|Q96S55|WRIP1_HUMAN	WRNIP1	WRIP1_HUMAN ATPase WRNIP1	2	202.052	228.625	215.339	180.24	179.931	180.086	0.83629	-0.257924	209.407	195.877	202.642	0.941039	-0.0876731	206.438	223.145	214.791	0.99746	-0.00366938	175.701	257.906	216.803	1.0068	0.00978177	#N/A	#N/A	#N/A	#N/A	#N/A	#N/A	#N/A	#N/A	#N/A	#N/A	#N/A	#N/A	#N/A							OR2F2			LYRM1
sp|Q9BWH6|RPAP1_HUMAN	RPAP1	RPAP1_HUMAN RNA polymerase II-associated protein 1	1	45.6404	48.498	47.0692	36.3751	42.5122	39.4437	0.837993	-0.25499	46.7639	51.9902	49.377	1.04903	0.0690573	47.1202	48.0149	47.5675	1.01059	0.0151944	39.3053	41.2387	40.272	0.855591	-0.225006	#N/A	#N/A	#N/A	#N/A	#N/A	#N/A	#N/A	#N/A	RPAP1	#N/A	#N/A	#N/A	#N/A							OR2G2			MAB21L1
sp|P50552|VASP_HUMAN	VASP	VASP_HUMAN Vasodilator-stimulated phosphoprotein	5	1095.58	1030.82	1063.2	875.18	906.948	891.064	0.838096	-0.254812	974.286	938.108	956.197	0.899358	-0.153033	1049.03	1032.8	1040.91	0.97904	-0.0305607	1000.35	1132.48	1066.41	1.00302	0.00435597	#N/A	#N/A	#N/A	#N/A	#N/A	#N/A	#N/A	#N/A	#N/A	#N/A	#N/A	#N/A	#N/A							OR2G3			MACROD1
sp|Q9Y2I1|NISCH_HUMAN	NISCH	NISCH_HUMAN Nischarin	1	435.353	477.15	456.251	359.483	405.311	382.397	0.838128	-0.254758	444.581	357.443	401.012	0.878928	-0.186184	423.006	393.631	408.318	0.894942	-0.160134	436.451	446.975	441.713	0.968135	-0.04672	#N/A	#N/A	#N/A	#N/A	#N/A	#N/A	#N/A	#N/A	#N/A	#N/A	#N/A	#N/A	#N/A							OR2G6			MACROD2
sp|Q13177|PAK2_HUMAN	PAK2	PAK2_HUMAN Serine/threonine-protein kinase PAK 2	8	2150.58	2009.91	2080.24	1712.3	1774.74	1743.52	0.838132	-0.254751	1896.26	1952.25	1924.26	0.925014	-0.112453	1957.33	1884.73	1921.03	0.923463	-0.114873	1689.05	1569.92	1629.49	0.783314	-0.352337	#N/A	#N/A	#N/A	#N/A	#N/A	#N/A	#N/A	#N/A	#N/A	#N/A	#N/A	#N/A	#N/A							OR2H1			MAF
sp|P09234|RU1C_HUMAN	SNRPC	RU1C_HUMAN U1 small nuclear ribonucleoprotein C	1	114.19	102.584	108.387	88.0613	93.6281	90.8447	0.838151	-0.254717	89.9083	99.669	94.7886	0.874539	-0.193406	88.8414	95.3335	92.0874	0.849617	-0.235115	105.222	75.7141	90.4681	0.834676	-0.260711	#N/A	#N/A	#N/A	#N/A	#N/A	#N/A	#N/A	#N/A	SNRPC	#N/A	#N/A	#N/A	#N/A							OR2H2			MAFA
sp|Q9HBH5|RDH14_HUMAN	RDH14	RDH14_HUMAN Retinol dehydrogenase 14	10	2389.25	2477.21	2433.23	2118.33	1960.63	2039.48	0.838178	-0.254671	1909.24	1745.48	1827.36	0.751002	-0.413112	1944.1	2023.09	1983.59	0.815211	-0.294755	1832.27	1572.17	1702.22	0.699572	-0.515455	#N/A	#N/A	#N/A	#N/A	#N/A	#N/A	#N/A	#N/A	#N/A	#N/A	#N/A	#N/A	#N/A							OR2I1P			MAFB
sp|Q8NFC6|BD1L1_HUMAN	BOD1L1	BD1L1_HUMAN Biorientation of chromosomes in cell division protein 1-like 1	1	32.8027	36.4919	34.6473	30.3516	27.7297	29.0406	0.838179	-0.254669	35.2208	41.9519	38.5863	1.11369	0.155348	29.6977	32.8635	31.2806	0.902829	-0.147475	24.4555	33.0039	28.7297	0.829205	-0.2702	#N/A	#N/A	#N/A	#N/A	#N/A	#N/A	#N/A	#N/A	#N/A	#N/A	#N/A	#N/A	#N/A							OR2J1			MAFF
sp|Q00403|TF2B_HUMAN	GTF2B	TF2B_HUMAN Transcription initiation factor IIB	1	100.11	105.6	102.855	88.9679	83.4636	86.2157	0.838226	-0.254589	89.6995	90.8684	90.284	0.877779	-0.18807	84.3242	94.7627	89.5435	0.870579	-0.199952	73.598	119.229	96.4135	0.937373	-0.0933049	#N/A	#N/A	#N/A	#N/A	#N/A	#N/A	#N/A	#N/A	GTF2B	#N/A	#N/A	#N/A	#N/A							OR2J2			MAFG
sp|Q9H8Y8|GORS2_HUMAN	GORASP2	GORS2_HUMAN Golgi reassembly-stacking protein 2	9	3018.02	3304.38	3161.2	2618.33	2681.48	2649.9	0.838259	-0.254532	2694.46	2784.48	2739.47	0.866592	-0.206576	3126.69	2726.83	2926.76	0.925838	-0.111168	3166.49	4685.17	3925.83	1.24188	0.312525	#N/A	#N/A	GORASP2	#N/A	#N/A	#N/A	#N/A	#N/A	#N/A	#N/A	#N/A	#N/A	#N/A							OR2J3			MAFK
sp|Q9BZE4|NOG1_HUMAN	GTPBP4	NOG1_HUMAN Nucleolar GTP-binding protein 1	2	381.011	389.853	385.432	327.089	319.824	323.457	0.839205	-0.252905	326.272	345.554	335.913	0.871523	-0.198389	331.733	344.994	338.364	0.877881	-0.187902	265.39	369.507	317.448	0.823617	-0.279954	#N/A	#N/A	#N/A	#N/A	#N/A	#N/A	#N/A	#N/A	GTPBP4	#N/A	#N/A	#N/A	#N/A							OR2K2			MAGEA10
sp|Q9C0C2|TB182_HUMAN	TNKS1BP1	TB182_HUMAN 182 kDa tankyrase-1-binding protein	12	1557.39	1497.99	1527.69	1279.79	1284.36	1282.07	0.839225	-0.252871	1527.92	1421.42	1474.67	0.965294	-0.0509597	1450.96	1314.76	1382.86	0.905197	-0.143697	1470.32	1596.41	1533.37	1.00371	0.00534933	#N/A	#N/A	#N/A	#N/A	#N/A	#N/A	#N/A	#N/A	#N/A	#N/A	#N/A	#N/A	#N/A							OR2L13			MAGEA2
sp|P08473|NEP_HUMAN	MME	NEP_HUMAN Neprilysin	33	8217.89	8255.53	8236.71	6773.87	7052.21	6913.04	0.839296	-0.252748	8044.51	7088.48	7566.49	0.918631	-0.122443	7787.74	8614.12	8200.93	0.995656	-0.00628067	7390.04	9186.76	8288.4	1.00628	0.00902543	#N/A	#N/A	#N/A	#N/A	#N/A	MME	#N/A	#N/A	#N/A	#N/A	#N/A	#N/A	#N/A							OR2L2			MAGOHB
sp|P68366|TBA4A_HUMAN	TUBA4A	TBA4A_HUMAN Tubulin alpha-4A chain	10	3792.41	3782.59	3787.5	3287.65	3075.06	3181.36	0.839962	-0.251605	3520.07	3256.76	3388.41	0.894631	-0.160635	3258.77	3070.2	3164.48	0.835508	-0.259275	2446.57	3381.16	2913.86	0.769337	-0.378312	#N/A	#N/A	#N/A	#N/A	#N/A	#N/A	#N/A	#N/A	#N/A	#N/A	#N/A	#N/A	#N/A							OR2L3			MAJIN
sp|Q14103|HNRPD_HUMAN	HNRNPD	HNRPD_HUMAN Heterogeneous nuclear ribonucleoprotein D0	2	438.951	368.455	403.703	338.222	339.969	339.096	0.839963	-0.251603	340.924	472.345	406.635	1.00726	0.0104383	372.809	333.385	353.097	0.874645	-0.19323	336.663	366.356	351.51	0.870713	-0.199731	#N/A	#N/A	#N/A	#N/A	#N/A	#N/A	#N/A	#N/A	#N/A	#N/A	#N/A	#N/A	#N/A							OR2L5			MAK16
sp|Q9NQW6|ANLN_HUMAN	ANLN	ANLN_HUMAN Actin-binding protein anillin	2	146.033	125.435	135.734	111.939	116.085	114.012	0.839966	-0.251596	131.055	139.157	135.106	0.995373	-0.0066904	130.069	140.166	135.118	0.995458	-0.00656761	113.187	134.286	123.737	0.91161	-0.133511	#N/A	#N/A	#N/A	#N/A	#N/A	#N/A	#N/A	#N/A	#N/A	#N/A	#N/A	#N/A	#N/A							OR2L8			MAML1
sp|P53816|HRSL3_HUMAN	PLA2G16	HRSL3_HUMAN HRAS-like suppressor 3	1	57.1134	44.9989	51.0562	42.0922	43.6921	42.8922	0.840098	-0.251371	34.5857	40.9553	37.7705	0.739784	-0.434825	50.4405	48.0253	49.2329	0.964289	-0.052462	38.655	40.9167	39.7858	0.779257	-0.359829	#N/A	#N/A	#N/A	#N/A	#N/A	#N/A	#N/A	#N/A	#N/A	#N/A	#N/A	#N/A	#N/A							OR2M2			MAML2
sp|Q6MZW2|FSTL4_HUMAN	FSTL4	FSTL4_HUMAN Follistatin-related protein 4	1	152.869	153.389	153.129	113.099	144.227	128.663	0.840226	-0.25115	139.943	147.036	143.49	0.93705	-0.0938024	160.634	153.403	157.018	1.0254	0.036187	129.938	212.065	171.001	1.11672	0.159261	#N/A	#N/A	#N/A	#N/A	#N/A	#N/A	#N/A	#N/A	#N/A	#N/A	#N/A	#N/A	#N/A							OR2M3			MAML3
sp|O94842|TOX4_HUMAN	TOX4	TOX4_HUMAN TOX high mobility group box family member 4	1	24.3096	22.4624	23.386	17.2471	22.054	19.6505	0.84027	-0.251075	14.9636	21.9453	18.4545	0.789124	-0.341676	22.1676	19.2251	20.6964	0.884989	-0.176269	14.5506	16.3224	15.4365	0.660074	-0.599299	#N/A	#N/A	#N/A	#N/A	#N/A	#N/A	#N/A	#N/A	TOX4	#N/A	#N/A	#N/A	#N/A							OR2M4			MAMLD1
sp|Q9Y3I1|FBX7_HUMAN	FBXO7	FBX7_HUMAN F-box only protein 7	1	35.2452	31.4711	33.3581	25.3885	30.7089	28.0487	0.840835	-0.250105	34.912	34.7324	34.8222	1.04389	0.0619681	29.1394	29.6239	29.3817	0.880794	-0.183124	28.382	31.6048	29.9934	0.899133	-0.153394	#N/A	#N/A	#N/A	#N/A	#N/A	#N/A	#N/A	#N/A	#N/A	#N/A	#N/A	#N/A	#N/A							OR2M5			MAMSTR
sp|Q9NQY0|BIN3_HUMAN	BIN3	BIN3_HUMAN Bridging integrator 3	5	705.31	753.965	729.638	617.355	609.796	613.576	0.840932	-0.249939	719.172	779.277	749.225	1.02684	0.0382182	749.319	688.537	718.928	0.985322	-0.0213326	650.561	623.415	636.988	0.87302	-0.195914	#N/A	#N/A	#N/A	#N/A	#N/A	#N/A	#N/A	#N/A	#N/A	#N/A	#N/A	#N/A	#N/A							OR2M7			MATR3
sp|Q12824|SNF5_HUMAN	SMARCB1	SNF5_HUMAN SWI/SNF-related matrix-associated actin-dependent regulator of chromatin subfamily B member 1	1	28.187	23.4871	25.8371	21.258	22.2069	21.7325	0.841135	-0.249591	22.2205	22.6754	22.4479	0.868828	-0.202858	22.5896	23.8269	23.2082	0.898255	-0.154804	22.1853	29.6923	25.9388	1.00394	0.00567038	#N/A	#N/A	#N/A	#N/A	#N/A	#N/A	#N/A	#N/A	SMARCB1	#N/A	#N/A	#N/A	#N/A							OR2S2			MAU2
sp|Q9Y333|LSM2_HUMAN	LSM2	LSM2_HUMAN U6 snRNA-associated Sm-like protein LSm2	1	152.177	141.392	146.784	119.665	127.306	123.486	0.841271	-0.249358	142.928	162.269	152.599	1.03961	0.0560411	123.974	142.422	133.198	0.907439	-0.140127	124.418	105.091	114.755	0.781789	-0.355149	#N/A	#N/A	#N/A	#N/A	#N/A	#N/A	#N/A	#N/A	LSM2	#N/A	#N/A	#N/A	#N/A							OR2T1			MAX
sp|O60231|DHX16_HUMAN	DHX16	DHX16_HUMAN Putative pre-mRNA-splicing factor ATP-dependent RNA helicase DHX16	10	928.39	975.982	952.186	777.485	824.799	801.142	0.841371	-0.249185	947.483	887.717	917.6	0.963677	-0.053378	844.166	863.816	853.991	0.896874	-0.157023	719.397	765.336	742.367	0.779644	-0.359112	#N/A	#N/A	#N/A	#N/A	#N/A	#N/A	#N/A	#N/A	DHX16	#N/A	#N/A	#N/A	#N/A							OR2T10			MAZ
sp|Q8NC42|RN149_HUMAN	RNF149	RN149_HUMAN E3 ubiquitin-protein ligase RNF149	8	1051.7	1020.74	1036.22	871.414	873.035	872.225	0.841737	-0.248559	1041.67	823.137	932.404	0.899812	-0.152304	1089.99	1315.99	1202.99	1.16094	0.215294	1155.8	1619.66	1387.73	1.33922	0.421397	#N/A	#N/A	#N/A	#N/A	#N/A	#N/A	#N/A	#N/A	#N/A	#N/A	#N/A	#N/A	#N/A							OR2T11			MBD1
sp|Q8N1T3|MYO1H_HUMAN	MYO1H	MYO1H_HUMAN Unconventional myosin-Ih	1	82.2731	87.0862	84.6797	70.4519	72.1098	71.2809	0.841771	-0.248501	71.6401	56.6477	64.1439	0.757489	-0.400703	75.9359	86.1507	81.0433	0.957058	-0.0633224	69.1305	67.6206	68.3756	0.807461	-0.308535	#N/A	#N/A	#N/A	#N/A	#N/A	#N/A	#N/A	#N/A	#N/A	#N/A	#N/A	#N/A	#N/A							OR2T12			MBD2
sp|P04406|G3P_HUMAN	GAPDH	G3P_HUMAN Glyceraldehyde-3-phosphate dehydrogenase	147	46391	46461.7	46426.3	39461	38721.9	39091.4	0.84201	-0.248091	41877.6	37489.2	39683.4	0.85476	-0.226408	42273.5	48790.6	45532.1	0.980737	-0.0280614	38758.9	40754.9	39756.9	0.856343	-0.223739	#N/A	#N/A	#N/A	#N/A	#N/A	#N/A	#N/A	#N/A	#N/A	#N/A	#N/A	#N/A	#N/A							OR2T2			MBD3
[truncated: 2,344 more rows]
[truncated: 4 more columns]

## Sheet: LysoIP-Untreated-GPN22.5min
Control_1	Control_2	GPN_22.5min_1	GPN_22.5min_2	Number of peptides	Welch's T-test Difference GPN_22.5min_Control	-Log Welch's T-test p-value GPN_22.5min_Control	Welch's T-test q-value GPN_22.5min_Control	Welch's T-test Test statistic GPN_22.5min_Control	Protein Id	Gene Symbol (3417)	Description	ER (181)	ERGIC (23)	Golgi apparatus (95)	Lysosome (130)	Mitochondria (358)	Plasma Membrane (103)	Endosome (88)	Peroxisome (16)	Nucleus (297)	Cytoplasm (168)	AUTOPHAGY (35)	mTOR/AMPK (32)	ESCRT (24)
[truncated: 3,417 more rows]

[truncated: 3 more sheets: LysoIP-Untreated-GPN45min, LysoIP-Untreated-GPN90min, LysoIP-Untreated-GPN180min]
