# Supplementary material for: Quantitative proteomics reveals the selectivity of ubiquitin-binding autophagy receptors in the turnover of damaged lysosomes by lysophagy
Source: eLife. 2021 Sep 29;10:e72328. doi: 10.7554/eLife.72328 (PMC8523161; doi:10.7554/eLife.72328)
Supplement: Supplementary file 6. [file elife-72328-supp6.xlsx]

## Sheet: Proteomics raw data files
Experiment	Raw data file	Protein Map ID	Date	Number of files
Supplementary file 1:Lysosome IP vs Negative control proteomics	m17808	61674	2018-08-06	6
HeLa	m17808_20180806155707
TMT6plex	m17808_20180806130523
TMEM192 3xHA tag (3 replicates) and Negative control (no tag) (3 replicates)	m17808_20180806101315
	m17808_20180806072116
	m17808_20180806042924
Supplementary file 2:Lysosome IP proteomics - time course GPN treatment	m18585-m18590	62540	2018-10-20	6
HeLa
TMT10plex
Untreated(3 replicates) and GPN 22.5min, GPN 45min, GPN 90min, GPN 180min (2 replicates each)
Supplementary file 3: APEX2-ATG8 interaction proteomics	m19937	63516	2019-02-01	1
HeLa
APEX2-MAP1LC3B WT and K51A
TMT10plex
Untreated (2 replicates) and LLOMe 1000uM 1hr (3 replicates) for each genotype
Supplementary file 3: APEX2-ATG8 interaction proteomics	m19935	63509	2019-02-01	1
HeLa
APEX2-GABARAPL2 WT and Y49A/L50A
TMT10plex
Untreated (2 replicates) and LLOMe 1000uM 1hr (3 replicates) for each genotype
Supplementary file 4:APEX2-Galectins 1,3,8 and APEX2-CALCOCO2 interaction proteomics	m20605	64003	2019-03-22	1
HeLa
APEX2-LGALS1
APEX2-LGALS3
APEX2-GFP (Control)
TMT11plex
Untreated (2 replicates) and LLOMe 1000uM 1hr (2 replicates) for each genotype
Supplementary file 4:APEX2-Galectins 1,3,8 and APEX2-CALCOCO2 interaction proteomics	m20603	63988	2019-03-22	1
HeLa
APEX2-LGALS8
APEX2-CALCOCO2
APEX2-GFP (Control)
TMT10plex
Untreated (2 replicates) and LLOMe 1000uM 1hr (2 replicates) for each genotype
Supplementary file 5:APEX2-SQSTM1, APEX2-OPTN, APEX2-TAX1BP1 interaction proteomics	a22358	71814	2021-05-13	1
APEX2-SQSTM1
APEX2-GFP (Control)
TMT10plex
Untreated (2 replicates) and LLOMe 1000uM 1hr (3 replicates) for each genotype
Supplementary file 5:APEX2-SQSTM1, APEX2-OPTN, APEX2-TAX1BP1 interaction proteomics	a22360	71815	2021-05-13	1
APEX2-OPTN
APEX2-TAX1BP1
APEX2-GFP (Control)
TMT15plex
Untreated (2 replicates) and LLOMe 1000uM 1hr (3 replicates) for each genotype
